# Supplementary material
Source: PubMed Central journal article supplement (PMC7367077)
Supplement: NIHMS1578669-supplement-1.pdf [file NIHMS1578669-supplement-1.pdf]

## Table of contents

|                                                                                    |     |
|------------------------------------------------------------------------------------|-----|
| 1. General.....                                                                    | S3  |
| 2. General procedure for iodochlorination of alkynes .....                         | S3  |
| 3. General procedure for iodochlorination of aromatic alkynes .....                | S3  |
| 4. General procedure for iodochlorination of aliphatic alkynes .....               | S4  |
| 5. General procedure for iodochlorination alkynyl esters and sulfonyl alkynes..... | S4  |
| 6. General procedure for diiodination .....                                        | S4  |
| 7. General procedure for iodobromination.....                                      | S5  |
| 8. General procedure for dibromination.....                                        | S5  |
| 9. General procedure for chlorobromination .....                                   | S5  |
| 10. General procedure for Iodo-functionalization of alkynes .....                  | S6  |
| 11. Gram-scale synthesis of <b>2</b> .....                                         | S6  |
| 12. Characterization data of the products (compounds <b>2-105</b> ) .....          | S7  |
| 13. Synthesis of <b>100</b> .....                                                  | S32 |
| 14. Synthesis of <b>101</b> .....                                                  | S32 |
| 15. Synthesis of <b>58</b> .....                                                   | S33 |
| 16. Synthesis of <b>102</b> .....                                                  | S33 |
| 17. Synthesis of <b>103</b> .....                                                  | S34 |
| 18. Synthesis of <b>104</b> .....                                                  | S34 |
| 19. Synthesis of <b>105</b> .....                                                  | S35 |
| 20. Structure assignment of compound <b>18</b> .....                               | S36 |
| 21. Structure assignment of compound <b>62</b> .....                               | S39 |
| 22. Structure assignment of compound <b>95</b> .....                               | S41 |
| 23. Comparison experiments .....                                                   | S42 |
| 24. The crystallographic data of <b>10</b> .....                                   | S48 |
| 25. The crystallographic data of <b>29</b> .....                                   | S57 |
| 26. The crystallographic data of <b>51</b> .....                                   | S60 |
| 27. The crystallographic data of <b>69</b> .....                                   | S64 |
| 28. The crystallographic data of <b>82</b> .....                                   | S70 |
| 29. The crystallographic data of <b>91</b> .....                                   | S75 |
| 30. The crystallographic data of <b>101</b> .....                                  | S80 |

|     |                                               |     |
|-----|-----------------------------------------------|-----|
| 31. | The crystallographic data of <b>105</b> ..... | S83 |
| 32. | References .....                              | S88 |
| 33. | Copies of NMR Spectra .....                   | S89 |

## 1. General

Commercial reagents and solvents were obtained from the commercial providers and used without further purification. The products were purified using a commercial flash chromatography system or a regular glass column. TLC was developed on silica gel 60 F254 glass plates.  $^1\text{H}$  NMR (400 MHz, 500 MHz or 600 MHz) and  $^{13}\text{C}$  NMR (101 MHz, 126 MHz or 151 MHz) spectra were recorded on a Bruker NMR apparatus. The chemical shifts are reported in  $\delta$  (ppm) values ( $^1\text{H}$  and  $^{13}\text{C}$  NMR relative to  $\text{CHCl}_3$ ,  $\delta$  7.26 ppm for  $^1\text{H}$  NMR and  $\delta$  77.0 ppm for  $^{13}\text{C}$  NMR). Or alternatively,  $^1\text{H}$  NMR chemical shifts were referenced to tetramethylsilane signal (0 ppm). Multiplicities are recorded by s (singlet), d (doublet), t (triplet), q (quartet), p (pentet), h (hextet), m (multiplet) and br (broad). Coupling constants ( $J$ ), are reported in Hertz (Hz). GC analyses were performed using a Shimadzu GC-2010 ultragass chromatography–mass spectrometry instrument equipped with a Shimadzu AOC-20s autosampler.

## 2. General procedure for iodochlorination of alkynes

A 10 mL glass vial with a screw cap was charged with alkynes (0.2 mmol), NIS (0.3 mmol, 1.5 equiv.), LiCl (0.4 mmol, 2 equiv.) and a solvent mixture of DCM (0.5 mL) and HOAc (0.5 mL). The reaction mixture was stirred at rt for 24 h. Upon completion, the reaction mixture was quenched with saturated NaCl solution and was extracted with EtOAc, the combined organic layers were dried with anhydrous  $\text{Na}_2\text{SO}_4$ , and the solvent was removed in vacuum. The residue was purified by flash silica gel column chromatography (eluted with hexanes and ethyl acetate) to give the desired products.

## 3. General procedure for iodochlorination of aromatic alkynes

A 10 mL glass vial with a screw cap was charged with alkynes (0.2 mmol), NIS (0.3 mmol, 1.5 equiv.), LiCl (0.4 mmol, 2 equiv.) and a solvent mixture of DCM (0.5 mL) and HOAc (0.5 mL). The reaction mixture was stirred at  $-10\text{ }^\circ\text{C}$  for 18 h. Upon completion, the reaction mixture was quenched with saturated NaCl solution and was extracted with EtOAc, the combined organic layers were dried with anhydrous  $\text{Na}_2\text{SO}_4$  and the solvent was removed in vacuum. The residue

was purified by flash silica gel column chromatography (eluted with hexanes and ethyl acetate) to give the desired products.

#### **4. General procedure for iodochlorination of aliphatic alkynes**

A 10 mL glass vial with a screw cap was charged with alkynes (0.2 mmol), NIS (0.3 mmol, 1.5 equiv.), LiCl (0.4 mmol, 2 equiv) and a solvent mixture of DCM (0.5 mL) and HOAc (0.5 mL). The reaction mixture was stirred at -25 °C for 24 h. Upon completion, the reaction mixture was quenched with saturated NaCl solution and was extracted with EtOAc, the combined organic layers were dried with anhydrous Na<sub>2</sub>SO<sub>4</sub> and the solvent was removed in vacuum. The residue was purified by flash column chromatography on silica gel (eluted with hexanes and ethyl acetate) to give the desired products.

#### **5. General procedure for iodochlorination alkynyl esters and sulfonyl alkynes**

A 10 mL glass vial with a screw cap was charged with alkynes (0.2 mmol), NIS (0.4 mmol, 2 equiv.), LiCl (0.6 mmol, 3 equiv.) and a solvent mixture of DCM (0.5 mL) and HOAc (0.5 mL). The reaction mixture was stirred at rt for 48 h. Upon completion, the reaction mixture was quenched with saturated NaCl solution and was extracted with EtOAc, the combined organic layers were dried with anhydrous Na<sub>2</sub>SO<sub>4</sub>, and the solvent was removed in vacuum. The residue was purified by flash column chromatography on silica gel (eluted with hexanes and ethyl acetate) to give the desired products.

#### **6. General procedure for diiodination**

A 10 mL glass vial with a screw cap was charged with alkynes (0.2 mmol), NIS (0.3 mmol, 1.5 equiv.), LiI (0.4 mmol, 2equiv.) and a solvent mixture of DCM (0.5 mL) and HOAc (0.5 mL). The reaction mixture was stirred at 0 °C and warm to rt for 24 h. Upon completion, the reaction mixture was quenched with saturated NaCl solution and was extracted with EtOAc, the combined organic

layers were dried with anhydrous  $\text{Na}_2\text{SO}_4$  and the solvent was removed in vacuum. The residue was purified by flash column chromatography on silica gel (eluted with hexanes and ethyl acetate).

## **7. General procedure for iodobromination**

A 10 mL glass vial with a screw cap was charged with alkynes (0.2 mmol), NIS (0.3 mmol, 1.5 equiv.), LiBr (0.4 mmol, 2 equiv) and a solvent mixture of DCM (0.5 mL) and HOAc (0.5 mL). The reaction mixture was stirred at  $0^\circ\text{C}$  for 24 h. Upon completion, the reaction mixture was quenched with saturated NaCl solution and was extracted with EtOAc, the combined organic layers were dried with anhydrous  $\text{Na}_2\text{SO}_4$  and the solvent was removed in vacuum. The residue was purified by flash column chromatography on silica gel (eluted with hexanes and ethyl acetate).

## **8. General procedure for dibromination**

A 10 mL glass vial with a screw cap was charged with alkynes (0.2 mmol), NBS (0.24 mmol, 1.2 equiv.), LiBr (0.24 mmol, 1.2equiv.) and a solvent mixture of DCM (0.5 mL) and HOAc (0.5 mL). The reaction mixture was stirred at  $0^\circ\text{C}$  for 24 h. Upon completion, the reaction mixture was quenched with saturated NaCl solution and was extracted with EtOAc, the combined organic layers were dried with anhydrous  $\text{Na}_2\text{SO}_4$  and the solvent was removed in vacuum. The residue was purified by flash column chromatography on silica gel (eluted with hexanes and ethyl acetate).

## **9. General procedure for chlorobromination**

A 10 mL glass vial with a screw cap was charged with alkynes (0.2 mmol), NBS (0.24 mmol, 1.2 equiv.), LiCl (0.24 mmol, 1.2equiv.) and a solvent mixture of DCM (0.6 mL) and HOAc (0.4 mL). The reaction mixture was stirred at  $-40^\circ\text{C}$  for 24 h. Upon completion, the reaction mixture was quenched with saturated NaCl solution and was extracted with EtOAc, the combined organic layers were dried with anhydrous  $\text{Na}_2\text{SO}_4$  and the solvent was removed in vacuum. The residue was purified by flash column chromatography on silica gel (eluted with hexanes and ethyl acetate).

## 10. General procedure for Iodo-functionalization of alkynes

A 10 mL glass vial with a screw cap was charged with phenylacetylene (20.4mg, 0.2 mmol), NIS (0.24 mmol, 1.2 equiv.), Nucleophiles (0.24 mmol, 1.2 equiv.) and a solvent mixture of DCM (0.5 mL) and HOAc (0.5 mL). The reaction mixture was stirred at 0°C and warm to rt for 24 h. Upon completion, the reaction mixture was quenched with saturated NaCl solution and was extracted with EtOAc, the combined organic layers were dried with anhydrous Na<sub>2</sub>SO<sub>4</sub> and the solvent was removed in vacuum. The residue was purified by flash column chromatography on silica gel (eluted with hexanes and ethyl acetate).

## 11. Gram-scale synthesis of 2

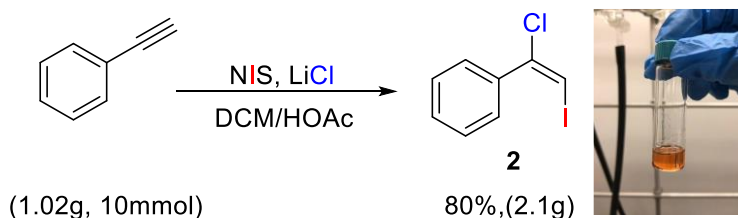

A 100 mL double neck flask equipped with a stir bar was charged with NIS (15 mmol, 3.37 g, 1.5 equiv.), and DCM (15 mL) then cool to -10°C. LiCl (20 mmol, 848 mg, 2 equiv.) was dissolved in the HOAc (25 ml) and slowly added to the reaction mixture for 45min. At the same time, to this flask, a solution of phenylacetylene (10 mmol, 1.02g, 1 equiv.) in DCM (10 ml) was slowly added over a course of 45 min and the resulting solution was stirred for 2h. after the reaction was complete, the reaction mixture was filtered through a short plug of Celite. And the organic layer was diluted a saturated aqueous Na<sub>2</sub>S<sub>2</sub>O<sub>3</sub> solution and extracted with DCM. The combined organic layer was then washed with brine, and was dried over anhydrous Na<sub>2</sub>SO<sub>4</sub>. After the solvent was removed under a reduced pressure, the crude product was purified by silica gel column chromatography to give the desired product 3 (2.1 g, 80% yield).

## 12. Characterization data of the products (compounds 2-105)

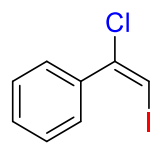 (*E*)-1-chloro-2-iodovinylbenzene (**2**). Colorless oil<sup>1</sup>, 37.5 mg, 71% yield. <sup>1</sup>H NMR (400 MHz, Chloroform-*d*) δ 7.61 – 7.48 (m, 2H), 7.45 – 7.31 (m, 3H), 6.77 (s, 1H). <sup>13</sup>C NMR (100 MHz, Chloroform-*d*) δ 137.6, 134.1, 129.5, 128.95, 128.91, 128.3, 128.2, 72.9.

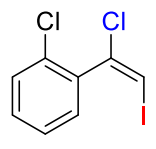 (*E*)-1-chloro-2-(1-chloro-2-iodovinyl)benzene (**3**). Yellow oil, 40.5 mg, 68% yield. <sup>1</sup>H NMR (500 MHz, Chloroform-*d*) δ 7.51 – 7.40 (m, 1H), 7.39 – 7.34 (m, 2H), 7.34 – 7.29 (m, 1H), 6.90 (s, 1H). <sup>13</sup>C NMR (126 MHz, Chloroform-*d*) δ 137.5, 132.5, 132.2, 130.7, 130.5, 129.99, 127.1, 78.3. IR (neat, cm<sup>-1</sup>): 3072, 2925, 1588, 1470, 1438, 1149, 1052, 888, 742, 679. HRMS (EI<sup>+</sup>) calcd. for C<sub>8</sub>H<sub>5</sub>Cl<sub>2</sub>I [M]<sup>+</sup>: 297.8813 found: 297.8810.

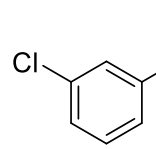 (*E*)-1-chloro-3-(1-chloro-2-iodovinyl)benzene (**4**). Yellow oil, 42.9 mg, 72% yield. <sup>1</sup>H NMR (400 MHz, Chloroform-*d*) δ 7.51 (td, *J* = 1.8, 0.6 Hz, 1H), 7.44 – 7.32 (m, 3H), 6.82 (s, 1H). <sup>13</sup>C NMR (100 MHz, Chloroform-*d*) δ 139.3, 134.2, 132.5, 129.6, 129.1, 127.2, 74.2. IR (neat, cm<sup>-1</sup>): 3064, 1561, 1470, 1414, 1247, 1160, 1080, 919, 881, 791. HRMS (EI<sup>+</sup>) calcd. for C<sub>8</sub>H<sub>5</sub>Cl<sub>2</sub>I [M]<sup>+</sup>: 297.8813 found: 297.8807.

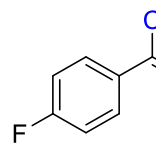 (*E*)-1-(1-chloro-2-iodovinyl)-4-fluorobenzene (**5**). Yellow oil, 47.4 mg, 84% yield. <sup>1</sup>H NMR (400 MHz, Chloroform-*d*) δ 7.46 (dd, *J* = 8.9, 5.3 Hz, 2H), 7.21 – 6.81 (m, 2H), 6.70 (s, 1H). <sup>19</sup>F NMR (376 MHz, Chloroform-*d*) δ -103.74 – -121.56 (m, 1F). <sup>13</sup>C NMR (100 MHz, Chloroform-*d*) δ 162.9 (d, *J* = 250.4 Hz), 133.6, 133.1, 131.1 (d, *J* = 8.6 Hz), 115.4 (d, *J* = 22.0 Hz), 73.4. IR (neat, cm<sup>-1</sup>): 3069, 1893, 1605, 1499, 1231, 1158, 1097, 1015, 886, 836. HRMS (EI<sup>+</sup>) calcd. for C<sub>8</sub>H<sub>5</sub>ClFI [M]<sup>+</sup>: 281.9108 found: 281.9101.

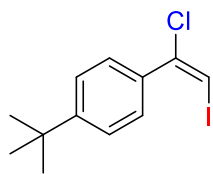

(*E*)-1-(tert-butyl)-4-(1-chloro-2-iodovinyl)benzene (**6**). Yellow oil, 49.9 mg, 78% yield.  $^1\text{H}$  NMR (500 MHz, Chloroform-*d*)  $\delta$  7.52 (d,  $J = 8.5$  Hz, 2H), 7.44 (d,  $J = 8.4$  Hz, 2H), 6.74 (s, 1H), 1.36 (s, 9H).  $^{13}\text{C}$  NMR (126 MHz, Chloroform-*d*)  $\delta$  152.7, 134.5, 134.2, 128.7, 125.2, 72.0, 34.9, 31.2. IR (neat,  $\text{cm}^{-1}$ ): 3068, 2961, 2903, 2867, 1608, 1504, 1461, 1363, 1267, 1155. HRMS ( $\text{EI}^+$ ) calcd. for  $\text{C}_{12}\text{H}_{14}\text{ClI}$  [ $\text{M}$ ] $^+$ : 319.9829 found: 319.9823.

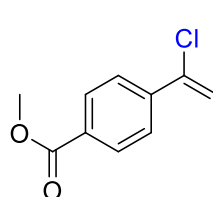

Methyl (*E*)-4-(1-chloro-2-iodovinyl)benzoate (**7**). Yellow oil, 34.0 mg, 53% yield.  $^1\text{H}$  NMR (400 MHz, Chloroform-*d*)  $\delta$  8.07 (d,  $J = 8.1$  Hz, 2H), 7.59 (d,  $J = 8.2$  Hz, 2H), 3.93 (s, 3H).  $^{13}\text{C}$  NMR (101 MHz,  $\text{CDCl}_3$ )  $\delta$  166.3, 141.9, 133.0, 130.9, 129.6, 129.1, 74.4, 52.3. IR (neat,  $\text{cm}^{-1}$ ): 3066, 2949, 1031, 1718, 1595, 1434, 1273, 1179, 1106, 1018. HRMS ( $\text{ESI}^+$ ) calcd. for  $\text{C}_{10}\text{H}_9\text{ClIO}_2$  [ $\text{M}+\text{H}$ ] $^+$ : 322.9336. found: 322.9330.

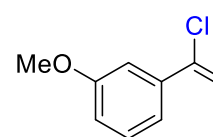

(*E*)-1-(1-chloro-2-iodovinyl)-3-methoxybenzene (**8**). Yellow oil, 47.0 mg, 80% yield.  $^1\text{H}$  NMR (500 MHz, Chloroform-*d*)  $\delta$  7.33 (t,  $J = 8.0$  Hz, 1H), 7.15 – 7.10 (m, 1H), 7.07 (dd,  $J = 2.6, 1.6$  Hz, 1H), 6.95 (ddd,  $J = 8.3, 2.6, 1.0$  Hz, 1H), 6.77 (s, 1H), 3.85 (s, 3H).  $^{13}\text{C}$  NMR (126 MHz, Chloroform-*d*)  $\delta$  159.3, 138.8, 133.9, 129.4, 121.3, 115.4, 114.3, 73.1, 55.4. IR (neat,  $\text{cm}^{-1}$ ): 3070, 3007, 2939, 2835, 1578, 1484, 1282, 1226, 1041, 784. HRMS ( $\text{EI}^+$ ) calcd. for  $\text{C}_9\text{H}_8\text{ClIO}$  [ $\text{M}$ ] $^+$ : 293.9303 found: 293.9302.

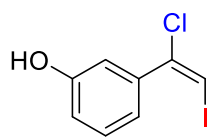

(*E*)-3-(1-chloro-2-iodovinyl)phenol (**9**). Yellow oil, 44.8 mg, 80% yield.  $^1\text{H}$  NMR (400 MHz, Chloroform-*d*)  $\delta$  7.32 (d,  $J = 7.9$  Hz, 1H), 7.12 (dt,  $J = 7.7, 1.3$  Hz, 1H), 7.01 (dd,  $J = 2.6, 1.7$  Hz, 1H), 6.89 (ddd,  $J = 8.1, 2.6, 1.0$  Hz, 1H), 6.78 (s, 1H), 5.06 (s, 1H).  $^{13}\text{C}$  NMR (101 MHz, Chloroform-*d*)  $\delta$  155.3, 139.1, 133.6, 129.7, 121.6, 116.6, 115.9, 73.2. IR (neat,  $\text{cm}^{-1}$ ):  $\nu = 3419, 1584, 1444, 1281, 1216, 954, 816, 784, 702, 666$   $\text{cm}^{-1}$ . HRMS ( $\text{ESI}^-$ ) calcd. for  $\text{C}_8\text{H}_5\text{ClIO}$  [ $\text{M}-\text{H}$ ] $^-$ : 278.9074, found 278.9068.



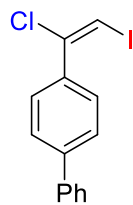

(*E*)-4-(1-chloro-2-iodovinyl)-1,1'-biphenyl (**10**). Yellow solid, 55 mg, 81% yield.  $^1\text{H}$  NMR (400 MHz, Chloroform-*d*)  $\delta$  7.70 - 7.67 (m, 6H), 7.53 (t,  $J = 7.1$  Hz, 2H), 7.46 - 7.43 (m, 1H), 6.86 (s, 1H).  $^{13}\text{C}$  NMR (101 MHz,  $\text{CDCl}_3$ )  $\delta$  142.3, 140.2, 136.4, 133.9, 129.6, 129.0, 127.9, 127.3, 127.1, 127.0, 73.1. HRMS (ESI $^+$ ) calcd. for  $\text{C}_{14}\text{H}_{10}\text{ClI}$  [ $\text{M}$ ] $^+$  339.9516, found 339.9510.

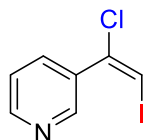

(*E*)-3-(1-chloro-2-iodovinyl)pyridine (**11**). Yellow oil, 38.7 mg, 73% yield.  $^1\text{H}$  NMR (500 MHz, Chloroform-*d*)  $\delta$  8.70 (ddd,  $J = 4.9, 1.8, 0.9$  Hz, 1H), 7.70 (td,  $J = 7.7, 1.8$  Hz, 1H), 7.60 (d,  $J = 7.9$  Hz, 1H), 7.23 (ddd,  $J = 7.6, 4.9, 1.2$  Hz, 1H), 7.00 (s, 1H).  $^{13}\text{C}$  NMR (126 MHz, Chloroform-*d*)  $\delta$  155.1, 149.8, 136.3, 123.8, 123.5, 121.7, 96.9. IR (neat,  $\text{cm}^{-1}$ ): 3050, 1708, 1578, 1564, 1460, 1427, 1283, 1150, 1048, 991. HRMS (ESI $^+$ ) calcd. for  $\text{C}_7\text{H}_6\text{ClIN}$  [ $\text{M}+\text{H}$ ] $^+$ : 265.9233 found: 265.9233.

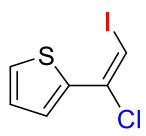

(*E*)-2-(1-chloro-2-iodovinyl)thiophene (**12**). Colorless oil, 37.8 mg, 70% yield.  $^1\text{H}$  NMR (400 MHz, Chloroform-*d*)  $\delta$  7.81 (dd,  $J = 3.1, 1.2$  Hz, 1H), 7.49 (dd,  $J = 5.2, 1.1$  Hz, 1H), 7.32 (dd,  $J = 5.1, 3.0$  Hz, 1H), 6.69 (s, 1H).  $^{13}\text{C}$  NMR (100 MHz, Chloroform-*d*)  $\delta$  137.2, 129.2, 127.8, 127.6, 125.1, 71.0. IR (neat,  $\text{cm}^{-1}$ ): 3072, 1566, 1418, 1261, 1122, 1043, 1048, 814, 702. HRMS (EI $^+$ ) calcd. for  $\text{C}_6\text{H}_4\text{ClIS}$  [ $\text{M}$ ] $^+$ : 269.8767 found: 269.8761.

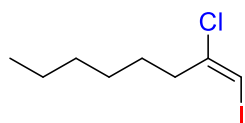

(*E*)-2-chloro-1-iodooct-1-ene (**13**). Colorless oil, 42.4 mg, 78% yield.  $^1\text{H}$  NMR (500 MHz, Chloroform-*d*)  $\delta$  6.29 (s, 1H), 2.75 - 2.38 (m, 2H), 1.75 - 1.56 (m, 2H), 1.41 - 1.23 (m, 6H), 0.99 - 0.81 (m, 3H).  $^{13}\text{C}$  NMR (126 MHz, Chloroform-*d*)  $\delta$  138.4, 72.1, 38.5, 31.5, 28.2, 26.6, 22.5, 14.1. IR (neat,  $\text{cm}^{-1}$ ): 2964, 2925, 2100, 1498, 1466, 1310, 1247, 1083, 860, 651. HRMS (EI $^+$ ) calcd. for  $\text{C}_8\text{H}_{14}\text{ClI}$  [ $\text{M}$ ] $^+$ : 271.9829 found: 271.9826.

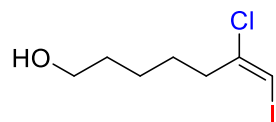

(*E*)-6-chloro-7-iodohept-6-en-1-ol (**14**). Yellow oil, 41.6 mg, 76% yield.  $^1\text{H}$  NMR (400 MHz, Chloroform-*d*)  $\delta$  6.32 (s, 1H), 3.69 (t,  $J = 6.5$  Hz, 2H), 2.61 (t,  $J = 7.4$  Hz, 2H), 1.70-1.64 (m, 4H), 1.63 – 1.03 (m, 3H).  $^{13}\text{C}$  NMR (101 MHz, Chloroform-*d*)  $\delta$  138.0, 72.5, 62.8, 38.4, 32.5, 26.5, 24.6. IR (neat,  $\text{cm}^{-1}$ ):  $\nu = 3380$ , 2933, 2860, 1450, 1429, 1051, 774, 668  $\text{cm}^{-1}$ . HRMS ( $\text{EI}^+$ ) calcd. for  $\text{C}_7\text{H}_{12}\text{ClI}_2$   $[\text{M}]^+$ : 273.9621, found 273.9616.

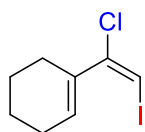

(*E*)-1-(1-chloro-2-iodovinyl)cyclohex-1-ene (**15**). Yellow oil, 39.7 mg, 74% yield.  $^1\text{H}$  NMR (400 MHz, Chloroform-*d*)  $\delta$  6.34 (s, 1H), 5.98 (p,  $J = 2.0$  Hz, 1H), 2.23 – 2.04 (m, 4H), 1.71 (qq,  $J = 5.1, 2.6$  Hz, 2H), 1.67 – 1.59 (m, 2H).  $^{13}\text{C}$  NMR (100 MHz, Chloroform-*d*)  $\delta$  137.0, 135.2, 132.3, 70.4, 25.8, 25.0, 22.2, 21.5. IR (neat,  $\text{cm}^{-1}$ ): 3068, 2932, 2863, 1741, 1544, 1435, 1369, 1219, 1014, 923. HRMS ( $\text{EI}^+$ ) calcd. for  $\text{C}_8\text{H}_{10}\text{ClI}$   $[\text{M}]^+$ : 267.9510, found: 267.9506.

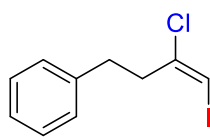

(*E*)-(3-chloro-4-iodobut-3-en-1-yl)benzene (**16**). Colorless oil, 53.7 mg, 92% yield.  $^1\text{H}$  NMR (400 MHz, Chloroform-*d*)  $\delta$  7.29 – 7.22 (m, 2H), 7.21 – 7.14 (m, 3H), 6.27 (s, 1H), 2.98 – 2.36 (m, 4H).  $^{13}\text{C}$  NMR (100 MHz, Chloroform-*d*)  $\delta$  140.0, 136.9, 128.6, 128.4, 126.3, 73.3, 40.6, 32.8. IR (neat,  $\text{cm}^{-1}$ ): 3072, 3026, 2926, 2860, 1603, 1494, 1453, 1428, 1165, 1025. HRMS ( $\text{EI}^+$ ) calcd. for  $\text{C}_{10}\text{H}_{10}\text{ClI}$   $[\text{M}]^+$ : 291.9516, found: 291.9512.

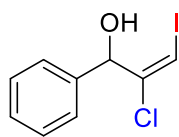

(*E*)-2-chloro-3-iodo-1-phenylprop-2-en-1-ol (**17**). Yellow oil, 45.9 mg, 78% yield.  $^1\text{H}$  NMR (500 MHz, Chloroform-*d*)  $\delta$  7.46 (d,  $J = 7.4$  Hz, 2H), 7.47-7.21 (m, 3H), 6.70 (s, 1H), 5.57 (d,  $J = 5.9$  Hz, 1H), 2.33 (d,  $J = 6.1$  Hz, 1H).  $^{13}\text{C}$  NMR (126 MHz, Chloroform-*d*)  $\delta$  139.9, 128.5, 128.2, 125.7, 119.7, 110.6, 70.6. IR (neat,  $\text{cm}^{-1}$ ): 3385, 3075, 3033, 1602, 1494, 1452, 1191, 1052, 784, 693. HRMS ( $\text{EI}^+$ ) calcd. for  $\text{C}_9\text{H}_8\text{ClIO}$   $[\text{M}]^+$ : 293.9308, found: 293.9303.

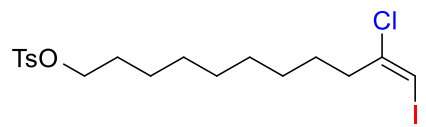
 (E)-10-chloro-11-iodoundec-10-en-1-yl-4-methylbenzenesulfonate (**18**). Colorless oil, 77.4 mg, 80% yield.  $^1\text{H}$  NMR (500 MHz, Chloroform-*d*)  $\delta$  7.80 (d,  $J = 8.3$  Hz, 2H), 7.35 (d,  $J = 8.0$  Hz, 2H), 6.29 (s, 1H), 4.03 (t,  $J = 6.5$  Hz, 2H), 2.61 – 2.52 (m, 2H), 2.46 (s, 3H), 1.73 – 1.51 (m, 4H), 1.38 – 1.15 (m, 10H).  $^{13}\text{C}$  NMR (100 MHz, Chloroform-*d*)  $\delta$  144.6, 138.2, 133.2, 129.8, 127.9, 72.2, 70.7, 38.4, 29.2, 29.1, 28.8, 28.8, 28.3, 26.6, 25.3, 21.6 IR (neat,  $\text{cm}^{-1}$ ): 2926, 2855, 1598, 1463, 1358, 1188, 1097, 951, 812. HRMS (ESI $^+$ ) calcd. for  $\text{C}_{18}\text{H}_{26}\text{ClIO}_3\text{SNa}$  [ $\text{M}+\text{Na}$ ] $^+$  : 507.0233, found: 507.0227.

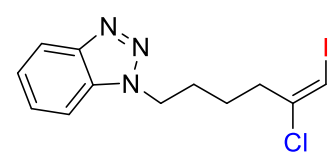
 (E)-1-(5-chloro-6-iodohex-5-en-1-yl)-1H-benzo[d][1,2,3]triazole (**19**). Yellow oil, 56.3 mg, 78% yield.  $^1\text{H}$  NMR (400 MHz, Chloroform-*d*)  $\delta$  7.92 (dd,  $J = 6.5, 3.1$  Hz, 2H), 7.43 (dd,  $J = 6.5, 3.1$  Hz, 2H), 6.38 (s, 1H), 4.83 (t,  $J = 7.0$  Hz, 2H), 2.69 (t,  $J = 7.3$  Hz, 2H), 2.55 – 2.03 (m, 2H), 1.73 (dq,  $J = 10.3, 7.5$  Hz, 2H).  $^{13}\text{C}$  NMR (100 MHz, Chloroform-*d*)  $\delta$  144.3, 137.1, 126.2, 117.9, 73.3, 56.1, 37.7, 37.7, 28.7, 28.6, 23.7, 23.6. IR (neat,  $\text{cm}^{-1}$ ): 3067, 2951, 2864, 1602, 1566, 1448, 1326, 1279, 1145, 1086. HRMS (ESI $^+$ ) calcd. for  $\text{C}_{12}\text{H}_{14}\text{ClIN}_3$  [ $\text{M}+\text{H}$ ] $^+$  : 361.9921, found: 361.9920.

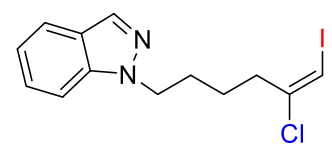
 (E)-1-(5-chloro-6-iodohex-5-en-1-yl)-1H-indazole (**20**). Yellow oil, 59.8 mg, 83% yield.  $^1\text{H}$  NMR (400 MHz, Chloroform-*d*)  $\delta$  8.00 (s, 1H), 7.73 (d,  $J = 8.1$  Hz, 1H), 7.46 – 7.30 (m, 2H), 7.14 (t,  $J = 7.4$  Hz, 1H), 6.30 (s, 1H), 4.42 (t,  $J = 7.0$  Hz, 2H), 2.60 (t,  $J = 7.3$  Hz, 2H), 2.12 – 1.78 (m, 2H), 1.63 (tt,  $J = 10.2, 6.5$  Hz, 2H).  $^{13}\text{C}$  NMR (100 MHz, Chloroform-*d*)  $\delta$  139.4, 137.4, 132.9, 126.1, 124.0, 121.1, 120.4, 108.9, 73.0, 48.4, 37.8, 28.5, 23.9. IR (neat,  $\text{cm}^{-1}$ ): 3067, 2972, 2948, 2870, 1741, 1466, 1428, 1368, 1219, 735. HRMS (EI $^+$ ) calcd. for  $\text{C}_{13}\text{H}_{14}\text{ClIN}_2$  [ $\text{M}$ ] $^+$  : 359.9890, found: 359.9885.

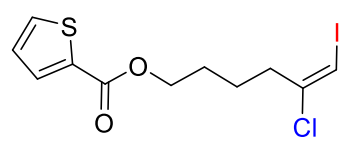
 (E)-5-chloro-6-iodohex-5-en-1-yl thiophene-2-carboxylate (**21**). Colorless oil, 58.4 mg, 79% yield.  $^1\text{H}$  NMR (400 MHz, Chloroform-*d*)  $\delta$  7.80 (dd,  $J = 3.7, 1.3$  Hz, 1H), 7.55 (dd,  $J = 5.0, 1.3$  Hz, 1H), 7.10

(dd,  $J = 5.0, 3.7$  Hz, 1H), 6.33 (s, 1H), 4.46 – 4.05 (m, 2H), 2.65 (t,  $J = 7.0$  Hz, 2H), 1.95 – 1.61 (m, 4H).  $^{13}\text{C}$  NMR (100 MHz, Chloroform- $d$ )  $\delta$  162.1, 137.4, 133.7, 133.3, 132.2, 127.6, 72.9, 64.5, 37.9, 27.4, 23.1. IR (neat,  $\text{cm}^{-1}$ ): 3074, 2958, 2857, 1703, 1522, 1417, 1257, 1090, 752, 721. HRMS (ESI $^{+}$ ) calcd. for  $\text{C}_{13}\text{H}_{14}\text{ClIN}_2$  [M-I] $^{+}$  : 243.0247, found: 243.0243.

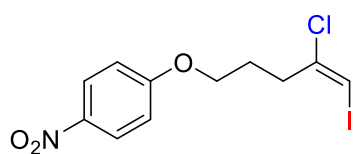

(*E*)-1-((4-chloro-5-iodopent-4-en-1-yl)oxy)-4-nitrobenzene (**22**).

White solid, 60.2 mg, 82% yield.  $^1\text{H}$  NMR (500 MHz, Chloroform- $d$ )  $\delta$  8.21 (d,  $J = 9.3$  Hz, 2H), 6.97 (d,  $J = 9.2$  Hz, 2H), 6.40 (s, 1H), 4.09 (t,  $J = 6.1$  Hz, 2H), 2.83 (t,  $J = 7.1$  Hz, 2H), 2.15 (td,  $J = 6.9, 1.0$  Hz, 2H).  $^{13}\text{C}$  NMR (126 MHz, Chloroform- $d$ )  $\delta$  163.8, 141.5, 136.6, 125.9, 114.5, 73.8, 66.8, 35.1, 26.1. IR (neat,  $\text{cm}^{-1}$ ): 2926, 2855, 1598, 1463, 1358, 1188, 1174, 1097, 951, 812. HRMS (ESI $^{+}$ ) calcd. for  $\text{C}_{11}\text{H}_{12}\text{ClINO}_3$  [M+H] $^{+}$ : 367.9550, found: 367.9542.

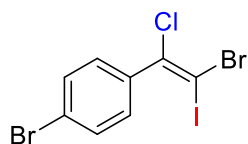

(*E*)-1-bromo-4-(2-bromo-1-chloro-2-iodovinyl)benzene (**23**). Yellow oil, 65.5 mg, 78% yield.  $^1\text{H}$  NMR (400 MHz, Chloroform- $d$ )  $\delta$  7.54 (d,  $J = 8.4$  Hz, 2H), 7.28 (d,  $J = 8.4$  Hz, 2H).  $^{13}\text{C}$  NMR (100 MHz, Chloroform- $d$ )  $\delta$

138.5, 134.8, 131.8, 130.5, 123.9, 52.6. IR (neat,  $\text{cm}^{-1}$ ):  $\nu = 3084, 2922, 1909, 1573, 1480, 1391, 1181, 1069, 1009, 828$ . HRMS (EI $^{+}$ ) calcd. for  $\text{C}_8\text{H}_4\text{Br}_2\text{ClI}$  [M] $^{+}$ : 419.7407, found: 419.7406.

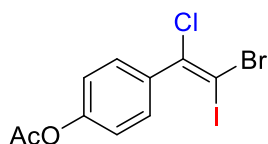

(*E*)-4-(2-bromo-1-chloro-2-iodovinyl)phenyl acetate (**24**). White solid, 72.8 mg, 91% yield.  $^1\text{H}$  NMR (500 MHz, Chloroform- $d$ )  $\delta$  7.43 (d,  $J = 8.8$  Hz, 2H), 7.15 (d,  $J = 8.7$  Hz, 2H), 2.32 (s, 3H).  $^{13}\text{C}$  NMR (126 MHz, Chloroform- $d$ )  $\delta$  168.9, 151.3, 130.2, 121.8, 52.4, 21.2. IR (neat,  $\text{cm}^{-1}$ ): 2935, 1766, 1727, 1598,

1498, 1366, 1162, 1008, 898, 852. HRMS (EI $^{+}$ ) calcd. for  $\text{C}_{10}\text{H}_7\text{BrClIO}_2$  [M] $^{+}$ : 399.8363 found: 399.8355.

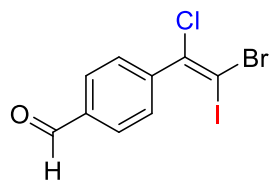

(*E*)-4-(2-bromo-1-chloro-2-iodovinyl)benzaldehyde (**25**). Yellow solid, 63.6 mg, 86% yield.  $^1\text{H}$  NMR (400 MHz, Chloroform-*d*)  $\delta$  9.94 (s, 1H), 7.82 (d,  $J = 8.2$  Hz, 2H), 7.48 (d,  $J = 8.2$  Hz, 2H).  $^{13}\text{C}$  NMR (126 MHz, Chloroform-*d*)  $\delta$  191.3, 145.2, 136.6, 134.4, 129.9, 129.7, 53.3. IR (neat,  $\text{cm}^{-1}$ ): 2828, 2553, 1682, 1605, 1428, 1278, 1205, 926, 864, 763. HRMS ( $\text{EI}^+$ ) calcd. for  $\text{C}_9\text{H}_5\text{BrClIO}$  [ $\text{M}$ ] $^+$ : 369.8248 found: 369.8251.

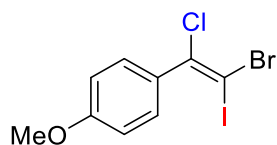

(*E*)-1-(2-bromo-1-chloro-2-iodovinyl)-4-methoxybenzene (**26**). White solid, 62.5 mg, 84% yield.  $^1\text{H}$  NMR (500 MHz, Chloroform-*d*)  $\delta$  7.36 (d,  $J = 8.8$  Hz, 2H), 6.92 (d,  $J = 8.8$  Hz, 2H), 3.85 (s, 3H).  $^{13}\text{C}$  NMR (100 MHz, Chloroform-*d*)  $\delta$  160.2, 136.0, 131.7, 130.3, 113.7, 55.2, 51.1. IR (neat,  $\text{cm}^{-1}$ ): 3006, 2926, 2840, 1896, 1605, 1504, 1296, 1237, 1175, 1026. HRMS ( $\text{EI}^+$ ) calcd. for  $\text{C}_9\text{H}_7\text{BrClIO}$  [ $\text{M}$ ] $^+$ : 371.8408 found: 371.8408.

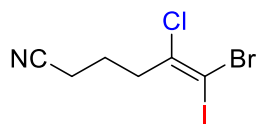

(*E*)-6-bromo-5-chloro-6-iodohex-5-enenitrile (**27**). Yellow oil, 57.2 mg, 86% yield.  $^1\text{H}$  NMR (500 MHz, Chloroform-*d*)  $\delta$  2.99 – 2.59 (m, 2H), 2.43 (t,  $J = 7.2$  Hz, 2H), 2.02 (p,  $J = 7.2$  Hz, 2H).  $^{13}\text{C}$  NMR (126 MHz, Chloroform-*d*)  $\delta$  136.4, 118.8, 51.4, 40.6, 23.2, 16.2. IR (neat,  $\text{cm}^{-1}$ ): 2925, 2247, 1561, 1452, 1424, 1177, 1093, 909, 795, 760. HRMS (ESI) calcd. for  $\text{C}_6\text{H}_7\text{BrClIN}$  [ $\text{M}+\text{H}$ ] $^+$  333.8495, found 333.8489.

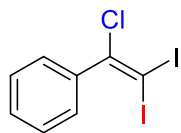

(1-chloro-2,2-diiodovinyl)benzene (**28**)<sup>2</sup>. Yellow solid, 62.4 mg, 80% yield.  $^1\text{H}$  NMR (400 MHz, Chloroform-*d*)  $\delta$  7.38 (s, 5H).  $^{13}\text{C}$  NMR (100 MHz, Chloroform-*d*)  $\delta$  140.6, 139.6, 129.4, 128.6, 128.5, 14.2.

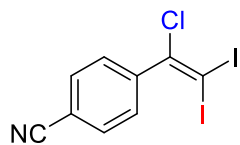

4-(1-chloro-2,2-diiodovinyl)benzonitrile (**29**). Yellow oil, 71.3 mg, 86% yield.  $^1\text{H}$  NMR (500 MHz, Chloroform-*d*)  $\delta$  7.71 (d,  $J = 8.4$  Hz, 2H), 7.53 (d,  $J = 8.4$  Hz, 2H).  $^{13}\text{C}$  NMR (100 MHz, Chloroform-*d*)  $\delta$  143.6, 137.9, 132.2, 129.3, 117.9, 113.0, 16.2. IR (neat,  $\text{cm}^{-1}$ ): 3084, 2221, 1603, 1496, 1402, 1018, 841, 726

555cm<sup>-1</sup>. HRMS (EI<sup>+</sup>) calcd. for C<sub>9</sub>H<sub>4</sub>ClI<sub>2</sub>N [M]<sup>+</sup>: 414.8116 found: 414.8112.

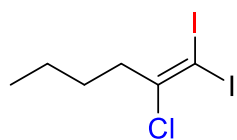

2-Chloro-1,1-diodohex-1-ene (**30**). Yellow oil, 62.1 mg, 84% yield. <sup>1</sup>H NMR (500 MHz, Chloroform-*d*) δ 2.77 – 2.40 (m, 2H), 1.60 (q, *J* = 7.6, 6.8 Hz, 2H), 1.38 (h, *J* = 7.4 Hz, 2H), 0.96 (t, *J* = 7.3 Hz, 3H). <sup>13</sup>C NMR (126 MHz, Chloroform-*d*) δ 144.1, 41.3, 29.4, 21.7, 13.9, 10.7. IR (neat, cm<sup>-1</sup>): 2960, 2929, 2869, 1567, 1456, 1296, 1125, 759, 731, 683. HRMS (EI<sup>+</sup>) calcd. for C<sub>6</sub>H<sub>10</sub>ClI<sub>2</sub> [M]<sup>+</sup>: 370.8560, found: 370.8555.

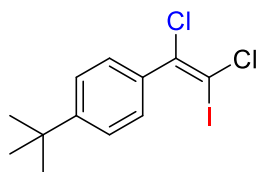

(*E*)-1-(tert-butyl)-4-(1,2-dichloro-2-iodovinyl)benzene (**31**). White solid, 48.8 mg, 69% yield. <sup>1</sup>H NMR (500 MHz, Chloroform-*d*) δ 7.42 (d, *J* = 8.7 Hz, 2H), 7.35 (d, *J* = 8.6 Hz, 2H), 1.35 (s, 9H). <sup>13</sup>C NMR (126 MHz, Chloroform-*d*) δ 152.9, 136.2, 133.6, 128.9, 125.4, 69.0, 34.8, 31.2. IR (neat, cm<sup>-1</sup>): 2971, 2870, 1926, 1463, 1111, 937, 850, 818, 724, 676. HRMS (EI<sup>+</sup>) calcd. for C<sub>12</sub>H<sub>13</sub>Cl<sub>2</sub>I [M]<sup>+</sup>: 353.9439, found: 353.9429.

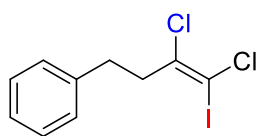

(*E*)-(3,4-dichloro-4-iodobut-3-en-1-yl)benzene (**32**). Yellow oil, 41.1 mg, 63% yield. <sup>1</sup>H NMR (500 MHz, Chloroform-*d*) δ 7.37 – 7.29 (m, 2H), 7.27 – 7.21 (m, 2H), 3.45 – 2.40 (m, 4H). <sup>13</sup>C NMR (100 MHz, Chloroform-*d*) δ 139.5, 135.2, 128.5, 126.4, 68.0, 43.6, 33.2. IR (neat, cm<sup>-1</sup>): 3067, 2948, 2892, 2834, 1612, 1481, 1451, 1247, 1085, 967. HRMS (EI<sup>+</sup>) calcd. for C<sub>10</sub>H<sub>9</sub>Cl<sub>2</sub>I [M]<sup>+</sup>: 325.9126, found: 325.9121.

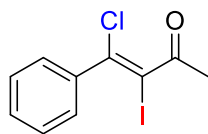

(*E*)-4-chloro-3-iodo-4-phenylbut-3-en-2-one (**33**)<sup>3</sup>. Yellow oil, 44.1 mg, 72% yield. <sup>1</sup>H NMR (400 MHz, Chloroform-*d*) δ 7.55 – 7.46 (m, 2H), 7.45 – 7.36 (m, 3H), 2.57 (s, 3H). <sup>13</sup>C NMR (100 MHz, Chloroform-*d*) δ 197.9, 138.3, 131.0, 129.7, 128.7, 128.3, 92.1, 27.2. IR (neat, cm<sup>-1</sup>): 3061, 2925, 1706, 1616, 1487, 1355, 1442, 1191, 766, 717. HRMS (ESI) Calculated for C<sub>10</sub>H<sub>9</sub>ClIO [M+H]<sup>+</sup> 306.9386, found 306.9381.

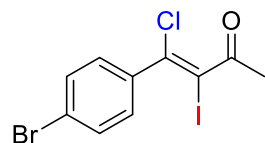

(*E*)-4-(4-bromophenyl)-4-chloro-3-iodobut-3-en-2-one (**34**). Yellow solid, 58.3 mg, 76% yield.  $^1\text{H}$  NMR (500 MHz, Chloroform-*d*)  $\delta$  7.58 (d,  $J = 8.5$  Hz, 2H), 7.38 (d,  $J = 8.4$  Hz, 2H), 2.56 (s, 3H).  $^{13}\text{C}$  NMR (126 MHz, Chloroform-*d*)  $\delta$  197.8, 137.2, 131.8, 130.5, 129.9, 124.2, 92.9, 27.3. IR (neat,  $\text{cm}^{-1}$ ): 3082, 2957, 1922, 1700, 1605, 1479, 1348, 1188, 836, 728. HRMS ( $\text{EI}^+$ ) calcd. for  $\text{C}_{10}\text{H}_7\text{BrClIO}$  [ $\text{M}$ ] $^+$ : 383.8413, found: 383.8407.

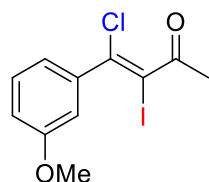

(*E*)-4-chloro-3-iodo-4-(3-methoxyphenyl)but-3-en-2-one (**35**). Yellow solid, 60.5 mg, 90% yield.  $^1\text{H}$  NMR (400 MHz, Chloroform-*d*)  $\delta$  7.33 (t,  $J = 8.0$  Hz, 1H), 7.06 (d,  $J = 7.7$  Hz, 1H), 6.99 (t,  $J = 2.1$  Hz, 1H), 6.95 (dd,  $J = 8.5, 2.3$  Hz, 1H), 3.84 (s, 3H), 2.56 (s, 3H).  $^{13}\text{C}$  NMR (100 MHz, Chloroform-*d*)  $\delta$  197.7, 159.0, 139.2, 130.5, 129.3, 120.8, 115.4, 113.8, 92.0, 55.1, 27.0. IR (neat,  $\text{cm}^{-1}$ ): 2962, 2920, 2849, 1706, 1585, 1487, 1358, 1320, 1264, 1170. HRMS ( $\text{EI}^+$ ) calcd. for  $\text{C}_{11}\text{H}_{10}\text{ClIO}_2$  [ $\text{M}$ ] $^+$ : 335.9409, found: 335.9403.

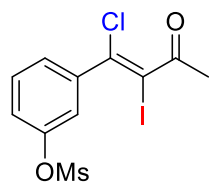

(*E*)-3-(1-chloro-2-iodo-3-oxobut-1-en-1-yl)phenylmethanesulfonate (**36**). Yellow oil, 59.2 mg, 74% yield.  $^1\text{H}$  NMR (400 MHz, Chloroform-*d*)  $\delta$  7.56 – 7.45 (m, 2H), 7.45 – 7.41 (m, 1H), 7.36 (dt,  $J = 7.4, 2.1$  Hz, 1H), 3.20 (s, 3H), 2.56 (s, 3H).  $^{13}\text{C}$  NMR (100 MHz, Chloroform-*d*)  $\delta$  197.5, 148.6, 140.1, 130.2, 128.9, 127.8, 123.5, 122.6, 93.5, 37.6, 27.1. IR (neat,  $\text{cm}^{-1}$ ): 3031, 2934, 1701, 1578, 1478, 1352, 1176, 1132, 962, 825. HRMS ( $\text{EI}^+$ ) calcd. for  $\text{C}_{11}\text{H}_{10}\text{ClIO}_4\text{S}$  [ $\text{M}$ ] $^+$ : 399.9028, found: 399.9027.

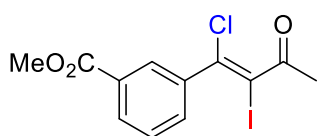

Methyl (*E*)-3-(1-chloro-2-iodo-3-oxobut-1-en-1-yl)benzoate (**37**). Yellow solid, 42.2 mg, 58% yield.  $^1\text{H}$  NMR (500 MHz, Chloroform-*d*)  $\delta$  8.18 – 8.14 (m, 1H), 8.08 (ddd,  $J = 7.8, 1.7, 1.2$  Hz, 1H), 7.66 (ddd,  $J = 7.7, 1.9, 1.2$  Hz, 1H), 7.51 (d,  $J = 7.8$  Hz, 1H), 3.94 (s, 3H), 2.57 (s, 3H).  $^{13}\text{C}$  NMR (126 MHz, Chloroform-*d*)  $\delta$  197.7, 166.1, 138.8, 133.2, 130.8, 130.6, 130.1, 129.9, 128.7, 93.3, 52.4, 27.3. IR (neat,  $\text{cm}^{-1}$ ): 2960, 2925, 1717, 1689, 1428, 1303, 1198, 1104, 1076, 728. HRMS ( $\text{EI}^+$ ) calcd. for  $\text{C}_{12}\text{H}_{10}\text{ClIO}_3$  [ $\text{M}$ ] $^+$ : 363.9358, found: 363.9356.

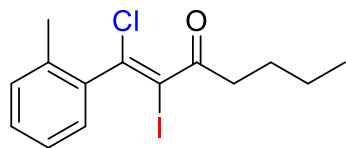

(*E*)-1-chloro-2-iodo-1-(*o*-tolyl)hept-1-en-3-one (**38**). Colorless oil, 59.4 mg, 82% yield.  $^1\text{H}$  NMR (500 MHz, Chloroform-*d*)  $\delta$  7.70 (dd,  $J = 7.8, 1.3$  Hz, 1H), 7.45 (td,  $J = 7.5, 1.4$  Hz, 1H), 7.34 – 7.28 (m, 2H), 2.85 – 2.76 (m, 2H), 2.62 (s, 3H), 1.78 – 1.63 (m, 2H), 1.47 (h,  $J = 7.4$  Hz, 2H), 1.01 (t,  $J = 7.3$  Hz, 3H).  $^{13}\text{C}$  NMR (126 MHz, Chloroform-*d*)  $\delta$  192.5, 141.3, 136.5, 132.7, 132.4, 131.4, 125.8, 90.5, 41.0, 29.0, 21.9, 21.7, 13.9. IR (neat,  $\text{cm}^{-1}$ ): 2960, 2925, 2859, 1672, 1452, 1233, 1031, 731. HRMS ( $\text{EI}^+$ ) calcd. for  $\text{C}_{14}\text{H}_{16}\text{ClIO}$  [ $\text{M}$ ] $^+$ : 361.9934, found: 361.9938.

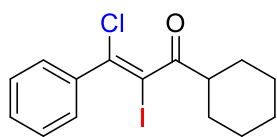

(*E*)-3-chloro-1-cyclohexyl-2-iodo-3-phenylprop-2-en-1-one (**39**). Yellow solid, 59.8 mg, 80% yield.  $^1\text{H}$  NMR (400 MHz, Chloroform-*d*)  $\delta$  7.60 – 7.24 (m, 5H), 2.92 (tt,  $J = 11.5, 3.5$  Hz, 1H), 2.00 (dd,  $J = 14.0, 2.4$  Hz, 2H), 1.73 (ddd,  $J = 11.2, 5.5, 2.4$  Hz, 2H), 1.69 – 1.52 (m, 1H), 1.43 (tdd,  $J = 12.8, 9.7, 3.4$  Hz, 2H), 1.30 – 1.01 (m, 3H).  $^{13}\text{C}$  NMR (126 MHz, Chloroform-*d*)  $\delta$  203.4, 138.7, 131.0, 129.7, 128.9, 128.4, 91.0, 48.8, 29.1, 25.8, 25.8. IR (neat,  $\text{cm}^{-1}$ ): 2950, 2922, 2846, 1696, 1442, 1142, 1094, 1024, 717, 693. HRMS ( $\text{EI}^+$ ) calcd. for  $\text{C}_{15}\text{H}_{16}\text{ClIO}$  [ $\text{M}$ ] $^+$ : 373.9928, found: 373.9929.

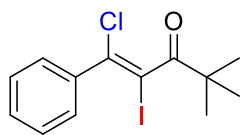

(*E*)-1-chloro-2-iodo-4,4-dimethyl-1-phenylpent-1-en-3-one (**40**). White solid, 59.2 mg, 85% yield.  $^1\text{H}$  NMR (500 MHz, Chloroform-*d*)  $\delta$  7.51 – 7.47 (m, 2H), 7.46 – 7.40 (m, 3H), 1.46 (s, 9H).  $^{13}\text{C}$  NMR (126 MHz, Chloroform-*d*)  $\delta$  207.5, 138.1, 129.7, 129.3, 129.0, 128.4, 87.9, 44.2, 28.7. IR (neat,  $\text{cm}^{-1}$ ): 2974, 2932, 2873, 1741, 1679, 1362, 1229, 1104, 735, 697. HRMS ( $\text{EI}^+$ ) calcd. for  $\text{C}_{13}\text{H}_{14}\text{ClIO}$  [ $\text{M}$ ] $^+$ : 347.9772, found: 347.9768.

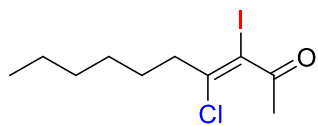

(*E*)-4-chloro-3-iododec-3-en-2-one (**41**). Yellow oil, 49.6 mg, 79% yield.  $^1\text{H}$  NMR (500 MHz, Chloroform-*d*)  $\delta$  2.97 – 2.53 (m, 2H), 2.45 (s, 3H), 1.64 (p,  $J = 7.4$  Hz, 2H), 1.47 – 1.13 (m, 6H), 1.15 – 0.49 (m, 3H).  $^{13}\text{C}$  NMR (126 MHz, Chloroform-*d*)  $\delta$  197.9, 135.3, 91.5, 41.4, 31.5, 28.2, 27.6, 26.7, 22.5, 14.0. IR (neat,  $\text{cm}^{-1}$ ): 2958, 2927, 2857, 1690, 1558, 1444, 1352, 1203, 1099, 734. HRMS ( $\text{EI}^+$ ) calcd. for  $\text{C}_{10}\text{H}_{16}\text{ClIO}$  [ $\text{M}$ ] $^+$ : 313.9885, found: 313.9889.



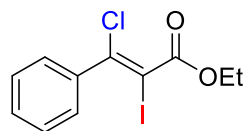

Ethyl (*E*)-3-chloro-2-iodo-3-phenylacrylate (**42**).<sup>4</sup> Yellow oil, 54.4 mg, 81% yield. <sup>1</sup>H NMR (400 MHz, Chloroform-*d*)  $\delta$  7.48 – 7.36 (m, 1H), 4.38 (q, *J* = 7.1 Hz, 0H), 1.39 (t, *J* = 7.1 Hz, 1H). <sup>13</sup>C NMR (100 MHz, Chloroform-*d*)  $\delta$  165.3, 138.7, 134.7, 129.8, 128.7, 128.6, 128.4, 81.2, 62.7, 13.9.

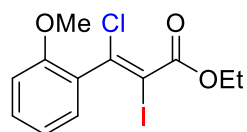

Ethyl (*E*)-3-chloro-2-iodo-3-(2-methoxyphenyl)acrylate (**43**). Yellow oil, 57.1 mg, 78% yield. <sup>1</sup>H NMR (500 MHz, Chloroform-*d*)  $\delta$  7.40 (ddd, *J* = 8.4, 7.4, 1.7 Hz, 1H), 7.31 – 7.17 (m, 1H), 7.02 (t, *J* = 7.3 Hz, 1H), 6.96 (d, *J* = 8.4 Hz, 1H), 4.38 (q, *J* = 7.1 Hz, 2H), 3.90 (s, 3H), 1.40 (t, *J* = 7.1 Hz, 3H). <sup>13</sup>C NMR (100 MHz, Chloroform-*d*)  $\delta$  164.4, 155.3, 133.1, 130.8, 129.3, 128.0, 120.1, 111.0, 84.2, 62.12, 62.07, 55.3, 13.5. IR (neat, cm<sup>-1</sup>): 2976, 2941, 2838, 1724, 1595, 1491, 1236, 1024, 756, 672. HRMS (EI<sup>+</sup>) calcd. for C<sub>12</sub>H<sub>12</sub>ClIO<sub>3</sub> [M]<sup>+</sup>: 365.9514 found: 365.9511.

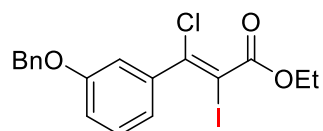

Ethyl (*E*)-3-(3-(benzyloxy)phenyl)-3-chloro-2-iodoacrylate (**44**). Yellow oil, 76.0 mg, 86% yield. <sup>1</sup>H NMR (500 MHz, Chloroform-*d*)  $\delta$  7.47 – 7.44 (m, 2H), 7.41 (t, *J* = 7.4 Hz, 2H), 7.35 (t, *J* = 8.2 Hz, 2H), 7.12 – 7.06 (m, 2H), 7.04 (ddd, *J* = 8.3, 2.5, 1.0 Hz, 1H), 5.11 (s, 2H), 4.39 (q, *J* = 7.1 Hz, 2H), 1.40 (t, *J* = 7.1 Hz, 3H). <sup>13</sup>C NMR (126 MHz, Chloroform-*d*)  $\delta$  165.3, 158.5, 139.9, 136.5, 134.4, 129.6, 128.7, 128.1, 127.5, 121.3, 116.8, 114.9, 81.3, 70.2, 62.7, 14.0. IR (neat, cm<sup>-1</sup>): 3032, 2981, 1724, 1578, 1454, 1226, 1175, 1026, 776, 691. HRMS (EI<sup>+</sup>) calcd. for C<sub>18</sub>H<sub>16</sub>ClIO<sub>3</sub> [M]<sup>+</sup>: 441.9833 found: 441.9823.

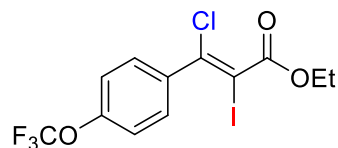

Ethyl (*E*)-3-chloro-2-iodo-3-(4-(trifluoromethoxy)phenyl)acrylate (**45**). Yellow oil, 65.5 mg, 78% yield. <sup>1</sup>H NMR (500 MHz, Chloroform-*d*)  $\delta$  7.53 (d, *J* = 8.8 Hz, 2H), 7.27 (d, *J* = 7.7 Hz, 2H), 4.39 (q, *J* = 7.1 Hz, 2H), 1.40 (t, *J* = 7.1 Hz, 3H). <sup>19</sup>F NMR (376 MHz, Chloroform-*d*)  $\delta$  -57.89, (s, 3F). <sup>13</sup>C NMR (100 MHz, Chloroform-*d*)  $\delta$  164.9, 149.7,

136.9, 133.1, 130.5,  $\delta$  120.2 (q,  $J = 256.1$  Hz), 120.43, 82.00, 62.65, 13.74. IR (neat,  $\text{cm}^{-1}$ ): 2985, 1726, 1615, 1504, 1242, 1205, 1162, 1027, 902, 854. HRMS ( $\text{EI}^+$ ) calcd. for  $\text{C}_{12}\text{H}_9\text{ClF}_3\text{IO}_3$  [ $\text{M}$ ] $^+$ : 419.9232, found: 419.9232.

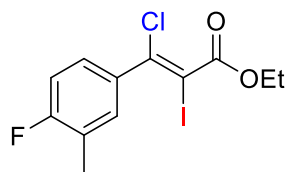

Ethyl (*E*)-3-chloro-3-(4-fluoro-3-methylphenyl)-2-iodoacrylate (**46**).

Yellow oil, 62.6 mg, 85% yield.  $^1\text{H}$  NMR (400 MHz, Chloroform-*d*)  $\delta$  7.29 (ddd,  $J = 16.2, 7.4, 2.3$  Hz, 2H), 7.03 (t,  $J = 8.9$  Hz, 1H), 4.36 (q,  $J = 7.1$  Hz, 2H), 2.30 (d,  $J = 2.0$  Hz, 3H), 1.38 (t,  $J = 7.1$  Hz, 3H).  $^{19}\text{F}$  NMR (376 MHz, Chloroform-*d*)  $\delta$  -109.06 – -120.58 (m, 1F).  $^{13}\text{C}$  NMR (100 MHz, Chloroform-*d*)  $\delta$  165.1, 161.6 (d,  $J = 249.1$  Hz), 134.3, 133.9, 132.0, 128.2, 125.2 (d,  $J = 17.6$  Hz), 115.0 (d,  $J = 22.3$  Hz), 81.2, 62.6, 14.4, 13.8. IR (neat,  $\text{cm}^{-1}$ ): 3469, 3009, 2974, 2950, 1745, 1494, 1445, 1372, 1226, 1031. HRMS ( $\text{EI}^+$ ) calcd. for  $\text{C}_{12}\text{H}_{11}\text{ClFIO}_2$  [ $\text{M}$ ] $^+$ : 367.9471, found: 367.9469.

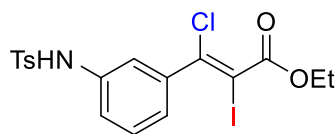

Ethyl (*E*)-3-chloro-2-iodo-3-(3-((4-methylphenyl) sulfonamido)

phenyl)acrylate (**47**).  $^1\text{H}$  NMR (400 MHz, Chloroform-*d*)  $\delta$  7.57 (d,  $J = 8.0$  Hz, 2H), 7.19 – 6.65 (m, 6H), 4.22 (q,  $J = 7.0$  Hz, 2H), 2.22 (s, 3H), 1.24 (t,  $J = 7.1$  Hz, 3H).  $^{13}\text{C}$  NMR (100 MHz, Chloroform-*d*)  $\delta$  165.3, 144.3, 140.0, 137.0, 135.9, 133.9, 130.0, 129.8, 127.6, 125.6, 123.0, 121.7, 82.2, 63.0, 21.7, 14.1. IR (neat,  $\text{cm}^{-1}$ ): 3252, 2982, 1709, 1597, 1465, 1392, 1231, 1154, 1090, 1028. HRMS ( $\text{ESI}^+$ ) calcd. for  $\text{C}_{18}\text{H}_{17}\text{ClINO}_4\text{Na}$  [ $\text{M}+\text{Na}$ ] $^+$ : 527.9509 found: 527.9500.

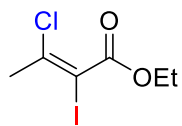

Ethyl (*E*)-3-chloro-2-iodobut-2-enoate (**48**)<sup>4</sup>. Colorless oil, 46.0 mg, 84% yield.

$^1\text{H}$  NMR (400 MHz, Chloroform-*d*)  $\delta$  4.29 (q,  $J = 7.1$  Hz, 2H), 2.45 (s, 3H), 1.33 (t,  $J = 7.1$  Hz, 3H).  $^{13}\text{C}$  NMR (126 MHz, Chloroform-*d*)  $\delta$  164.9, 135.0, 80.9, 62.5, 29.6, 13.9.

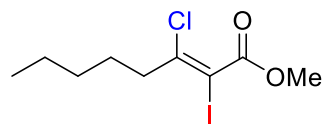

Methyl (*E*)-3-chloro-2-iodooct-2-enoate (**49**). Yellow oil, 56.2 mg, 89% yield.  $^1\text{H}$  NMR (500 MHz, Chloroform-*d*)  $\delta$  3.84 (s, 3H), 2.75 – 2.42 (m, 2H), 1.77 – 1.57 (m, 2H), 1.42 – 1.18 (m, 4H), 0.98 – 0.70 (m, 3H).  $^{13}\text{C}$  NMR (126 MHz, Chloroform-*d*)  $\delta$  165.4, 139.7, 79.5, 53.2, 41.7, 30.7, 26.4, 22.4, 13.9. IR (neat,  $\text{cm}^{-1}$ ): 2955, 2929, 2864, 1731, 1614, 1432, 1242, 1021, 790, 674. HRMS ( $\text{EI}^+$ ) calcd. for  $\text{C}_9\text{H}_{14}\text{ClIO}_2$  [ $\text{M}$ ] $^+$ : 315.9722, found: 315.9717.

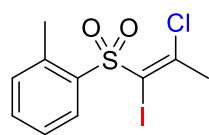

(*E*)-1-((2-chloro-1-iodoprop-1-en-1-yl)sulfonyl)-2-methylbenzene (**50**). White solid, 64.1 mg, 90% yield.  $^1\text{H}$  NMR (500 MHz, Chloroform-*d*)  $\delta$  7.38 – 7.33 (m, 1H), 7.30 (t,  $J = 8.6$  Hz, 2H), 7.15 (d,  $J = 7.6$  Hz, 1H), 3.38 (s, 3H), 2.32 (s, 3H).  $^{13}\text{C}$  NMR (126 MHz, Chloroform-*d*)  $\delta$  144.0, 141.1, 134.0, 130.9, 130.2, 126.8, 126.7, 101.4, 41.0, 18.8. IR (neat,  $\text{cm}^{-1}$ ): 2918, 2850, 1702, 1619, 1459, 1365, 1314, 1054, 797, 721. HRMS ( $\text{EI}^+$ ) calcd. for  $\text{C}_{10}\text{H}_{10}\text{ClIO}_2\text{S}$  [ $\text{M}$ ] $^+$ : 355.9129, found: 355.9126.

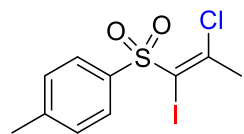

(*E*)-1-((2-chloro-1-iodoprop-1-en-1-yl)sulfonyl)-4-methylbenzene (**51**). White solid, 66.2 mg, 93% yield.  $^1\text{H}$  NMR (400 MHz, Chloroform-*d*)  $\delta$  7.89 (d,  $J = 8.3$  Hz, 2H), 7.35 (d,  $J = 8.5$  Hz, 2H), 2.58 (s, 3H), 2.46 (s, 3H).  $^{13}\text{C}$  NMR (100 MHz, Chloroform-*d*)  $\delta$  145.1, 143.2, 136.0, 129.6, 128.8, 99.2, 34.9, 21.7. IR (neat,  $\text{cm}^{-1}$ ): 2972, 1923, 1738, 1593, 1553, 1362, 1320, 1153, 856, 811. HRMS ( $\text{EI}^+$ ) calcd. for  $\text{C}_{10}\text{H}_{10}\text{ClIO}_2\text{S}$  [ $\text{M}$ ] $^+$ : 355.9129, found: 355.9124.

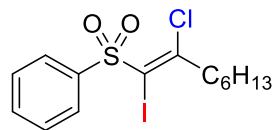

(*E*)-((2-chloro-1-iodooct-1-en-1-yl)sulfonyl)benzene (**52**). Yellow oil, 72.5 mg, 88% yield.  $^1\text{H}$  NMR (400 MHz, Chloroform-*d*)  $\delta$  8.04 – 7.92 (m, 2H), 7.66 (t,  $J = 7.4$  Hz, 1H), 7.56 (d,  $J = 8.0$  Hz, 2H), 3.10 – 2.18 (m, 2H), 1.58 (q,  $J = 7.7$  Hz, 2H), 1.50 – 1.08 (m, 6H), 1.06 – 0.38 (m, 3H).  $^{13}\text{C}$  NMR (101 MHz, Chloroform-*d*)  $\delta$  148.1, 139.3, 133.8, 128.9, 128.6, 98.3, 46.7, 31.4, 28.2, 26.9, 22.4, 14.0. IR (neat,  $\text{cm}^{-1}$ ):  $\nu = 3064, 2956, 2928, 2857, 1550, 1447, 1328, 1157, 1084, 849, 755, 717, 687, 591$   $\text{cm}^{-1}$ . HRMS ( $\text{EI}^+$ ) calcd. for  $\text{C}_{14}\text{H}_{18}\text{ClIO}_2\text{S}$  [ $\text{M}$ ] $^+$ : 411.9761, found: 411.9756.

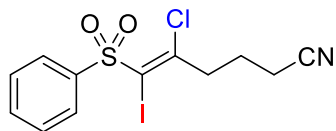

(*E*)-5-chloro-6-iodo-6-(phenylsulfonyl)hex-5-enitrile (**53**). Yellow oil, 61.6 mg, 78% yield.  $^1\text{H}$  NMR (400 MHz, Chloroform-*d*)  $\delta$  8.05 – 7.96 (m, 2H), 7.69 (t,  $J = 7.5$  Hz, 1H), 7.57 (t,  $J = 7.8$  Hz, 2H), 3.05 – 2.76 (m, 2H), 2.39 (t,  $J = 7.0$  Hz, 2H), 2.08 – 1.87 (m, 2H).  $^{13}\text{C}$  NMR (101 MHz, Chloroform-*d*)  $\delta$  144.6, 138.8, 134.2, 129.1, 128.8, 118.4, 101.0, 45.3, 22.9, 16.4. IR (neat,  $\text{cm}^{-1}$ ):  $\nu = 3064, 2937, 2247, 1552, 1448, 1325, 1155, 1082, 830, 757, 717, 687, 590$   $\text{cm}^{-1}$ . HRMS ( $\text{EI}^+$ ) calcd. for  $\text{C}_{12}\text{H}_{11}\text{ClINO}_2\text{S}$  [ $\text{M}$ ] $^+$ : 394.9244, found: 394.9245.

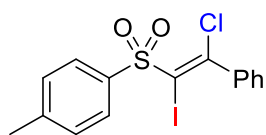

(*E*)-1-((2-chloro-1-iodo-2-phenylvinyl)sulfonyl)-4-methylbenzene (**54**). Yellow oil, 73.6 mg, 88% yield.  $^1\text{H}$  NMR (400 MHz, Chloroform-*d*)  $\delta$  7.47 (d,  $J = 8.3$  Hz, 2H), 7.41 – 7.35 (m, 1H), 7.34 – 7.27 (m, 2H), 7.23 – 7.15 (m, 4H), 2.41 (s, 3H).  $^{13}\text{C}$  NMR (101 MHz, Chloroform-*d*)  $\delta$  153.6, 144.8, 136.1, 135.8, 130.0, 129.4, 128.8, 128.4, 128.0, 106.3, 21.7. IR (neat,  $\text{cm}^{-1}$ ):  $\nu = 3059, 2920, 2851, 1592, 1322, 1152, 1082, 811, 719, 692, 661, 610$   $\text{cm}^{-1}$ . HRMS ( $\text{EI}^+$ ) calcd. for  $\text{C}_{15}\text{H}_{12}\text{ClIO}_2\text{S}$  [ $\text{M}$ ] $^+$ : 417.9291, found: 417.9285.

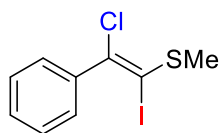

(*E*)-(2-chloro-1-iodo-2-phenylvinyl)(methyl)sulfane (**55**). Yellow oil, 52.7 mg, 85% yield.  $^1\text{H}$  NMR (400 MHz, Chloroform-*d*)  $\delta$  7.66 – 6.91 (m, 5H), 2.56 (s, 3H).  $^{13}\text{C}$  NMR (101 MHz, Chloroform-*d*)  $\delta$  142.6, 129.1, 129.0, 129.0, 128.3, 128.2, 93.1, 18.5. IR (neat,  $\text{cm}^{-1}$ ): 3056, 2922, 1594, 1556, 1436, 1070, 934, 834, 698  $\text{cm}^{-1}$ . HRMS ( $\text{EI}^+$ ) Calculated for  $\text{C}_9\text{H}_8\text{ClIS}$  [ $\text{M}$ ] $^+$ : 309.9081, found 309.9074.

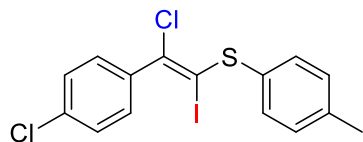

(*E*)-(2-chloro-2-(4-chlorophenyl)-1-iodovinyl)(p-tolyl)sulfane (**56**). Yellow oil, 70.5 mg, 84% yield.  $^1\text{H}$  NMR (400 MHz, Chloroform-*d*)  $\delta$  7.46 (d,  $J = 7.9$  Hz, 2H), 7.34 (s, 4H), 7.24 (d,  $J = 7.8$  Hz, 2H), 2.41 (s, 3H).  $^{13}\text{C}$  NMR (101 MHz, Chloroform-*d*)  $\delta$  141.0, 139.6, 134.3, 133.8, 130.4, 130.1, 129.8, 128.5, 128.5, 94.2, 21.4. IR (neat,  $\text{cm}^{-1}$ ): 3024, 2918, 1591, 1484, 1392, 1084, 1012, 830, 802, 726, 662  $\text{cm}^{-1}$ . HRMS ( $\text{EI}^+$ ) calcd. for  $\text{C}_{15}\text{H}_{11}\text{Cl}_2\text{IS}$  [ $\text{M}$ ] $^+$ : 419.9003, found: 419.8994.

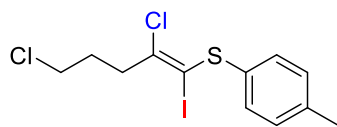

(*E*)-(2,5-dichloro-1-iodopent-1-en-1-yl)(phenyl)sulfane (**57**). Yellow oil, 57.3 mg, 77% yield.  $^1\text{H}$  NMR (400 MHz, Chloroform-*d*)  $\delta$  7.35 (d,  $J = 8.2$  Hz, 2H), 7.20 (d,  $J = 7.9$  Hz, 2H), 3.60 (t,  $J = 6.6$  Hz, 2H), 3.04 – 2.92 (m, 2H), 2.39 (s, 3H), 2.10 – 2.08 (m, 2H).  $^{13}\text{C}$  NMR (101 MHz, Chloroform-*d*)  $\delta$  139.0, 132.6, 130.0, 128.7, 128.0, 104.1, 43.4, 40.8, 31.5, 21.3. IR (neat,  $\text{cm}^{-1}$ ): 3025, 2924, 2855, 1602, 1494, 1083, 898, 805, 745, 698  $\text{cm}^{-1}$ . HRMS ( $\text{EI}^+$ ) calcd. for  $\text{C}_{11}\text{H}_{13}\text{Cl}_2\text{IS}$   $[\text{M}]^+$ : 385.9160, found 385.9166.

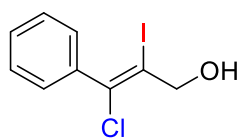

(*E*)-3-chloro-2-iodo-3-phenylprop-2-en-1-ol (**58**)<sup>5</sup>. Yellow solid, 44.1 mg, 75% yield.  $^1\text{H}$  NMR (500 MHz, Chloroform-*d*)  $\delta$  7.55 – 7.34 (m, 5H), 4.63 (s, 2H).  $^{13}\text{C}$  NMR (126 MHz, Chloroform-*d*)  $\delta$  140.9, 130.4, 129.2, 128.9, 128.4, 101.3, 67.8. IR (neat,  $\text{cm}^{-1}$ ): 3427, 3058, 2906, 1623, 1489, 1442, 1241, 1070, 1024, 873. HRMS ( $\text{EI}^+$ ) Calculated for  $\text{C}_9\text{H}_8\text{ClIO}$   $[\text{M}]^+$  293.9308, found 293.9311.

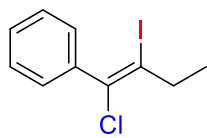

(*E*)-(1-chloro-2-iodobut-1-en-1-yl)benzene (**59**)<sup>1</sup>. Yellow oil, 47.9 mg, 82% yield.  $^1\text{H}$  NMR (400 MHz, Chloroform-*d*)  $\delta$  7.88 – 7.32 (m, 5H), 2.91 (q,  $J = 7.2$  Hz, 2H), 1.22 (t,  $J = 7.3$  Hz, 3H). IR (neat,  $\text{cm}^{-1}$ ):  $\nu = 3055, 2970, 2931, 2872, 1594, 1487, 1545, 1104, 1069, 875, 757, 694$   $\text{cm}^{-1}$ .  $^{13}\text{C}$  NMR (101 MHz, Chloroform-*d*)  $\delta$  141.9, 129.2, 128.8, 128.3, 127.7, 102.8, 36.3, 13.1.

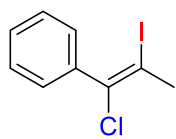

(*E*)-(1-chloro-2-iodoprop-1-en-1-yl)benzene (**60**)<sup>1</sup>. Colorless oil, 43.4 mg, 78% yield.  $^1\text{H}$  NMR (500 MHz, Chloroform-*d*)  $\delta$  7.54 – 7.32 (m, 5H), 2.76 (s, 3H).  $^{13}\text{C}$  NMR (126 MHz, Chloroform-*d*)  $\delta$  141.7, 129.1, 129.0, 128.8, 128.3, 92.0, 31.3.

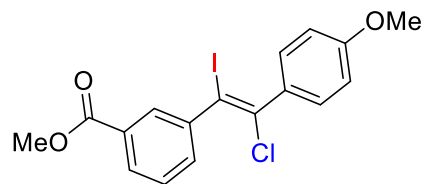

Methyl (*E*)-3-(2-chloro-1-iodo-2-(4-methoxyphenyl)vinyl)benzoate (**61**). White solid, 72.8 mg, 85% yield.  $^1\text{H}$  NMR (400 MHz, Chloroform-*d*)  $\delta$  8.12 (s, 1H), 7.98 (d,  $J = 7.8$  Hz, 1H), 7.63 (d,  $J = 7.8$  Hz, 1H), 7.52 – 7.36 (m, 3H), 6.94 (d,  $J = 8.7$  Hz, 2H), 3.94 (s, 3H), 3.85 (s, 3H).  $^{13}\text{C}$  NMR (100 MHz, Chloroform-*d*)  $\delta$  166.3, 159.9, 143.1, 133.3, 133.1, 131.4, 130.5, 130.3, 129.3, 129.3, 128.4, 113.5, 91.2, 55.2, 52.1. IR (neat,  $\text{cm}^{-1}$ ): 3068, 3019, 2952, 2839, 1725, 1602, 1506, 1438, 1292, 1230. HRMS ( $\text{EI}^+$ ) calcd. for  $\text{C}_{17}\text{H}_{14}\text{ClIO}_3$  [ $\text{M}$ ] $^+$ : 427.9676; found: 427.9670.

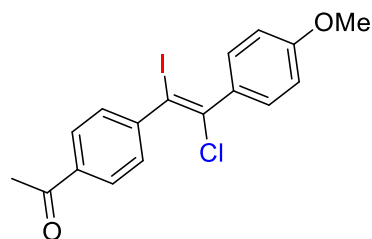

(*E*)-1-(4-(2-chloro-1-iodo-2-(4-methoxyphenyl)vinyl)phenyl)ethan-1-one (**62**). White solid, 75.8 mg, 92% yield.  $^1\text{H}$  NMR (500 MHz, Chloroform-*d*)  $\delta$  8.00 (d,  $J = 8.4$  Hz, 2H), 7.56 (d,  $J = 8.4$  Hz, 2H), 7.51 (d,  $J = 8.7$  Hz, 2H), 6.97 (d,  $J = 8.8$  Hz, 2H), 3.87 (s, 3H), 2.64 (s, 3H).  $^{13}\text{C}$  NMR (126 MHz, Chloroform-*d*)  $\delta$  197.3, 160.2, 147.5, 136.6, 133.3, 131.6, 130.7, 129.2, 128.4, 113.7, 91.1, 55.4, 26.7. IR (neat,  $\text{cm}^{-1}$ ): 3069, 2952, 2839, 1725, 1607, 1603, 1438, 1292, 1231, 1174. HRMS ( $\text{ESI}^+$ ) calcd. for  $\text{C}_{17}\text{H}_{15}\text{ClIO}_2$  [ $\text{M}+\text{H}$ ] $^+$ : 412.9805 found: 412.9802.

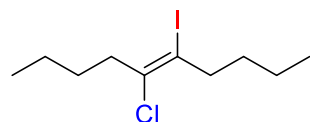

(*E*)-5-chloro-6-iododec-5-ene (**63**). Colorless oil, 54.0 mg, 90% yield.  $^1\text{H}$  NMR (400 MHz, Chloroform-*d*)  $\delta$  2.66 (q,  $J = 7.2$  Hz, 4H), 1.67 – 1.45 (m, 4H), 1.43 – 1.25 (m, 4H), 0.94 (td,  $J = 7.3, 3.3$  Hz, 6H).  $^{13}\text{C}$  NMR (100 MHz, Chloroform-*d*)  $\delta$  131.5, 99.1, 42.8, 41.6, 30.5, 29.2, 21.8, 21.5, 13.9. IR (neat,  $\text{cm}^{-1}$ ): 2958, 2927, 2863, 1619, 1456, 1379, 1108, 1080, 933, 728. HRMS ( $\text{EI}^+$ ) calcd. for  $\text{C}_{10}\text{H}_{18}\text{ClI}$  [ $\text{M}$ ] $^+$ : 300.0136 found: 300.0113.

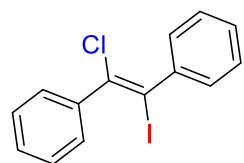

(*E*)-(1-chloro-2-iodoethene-1,2-diyl)dibenzene (**64**)<sup>6</sup>. White solid, 41.5 mg, 61% yield.  $^1\text{H}$  NMR (400 MHz, Chloroform-*d*)  $\delta$  7.55 – 7.35 (m, 9H), 7.34 – 7.27 (m, 1H).  $^{13}\text{C}$  NMR (100 MHz, Chloroform-*d*)  $\delta$  142.5, 141.5, 130.2,

128.9, 128.6, 128.3, 93.6. IR (neat,  $\text{cm}^{-1}$ ): 3061, 3016, 1957, 1633, 1487, 1442, 1073, 836, 697, 655. HRMS ( $\text{EI}^+$ ) calcd. for  $\text{C}_{14}\text{H}_{10}\text{ClI}$   $[\text{M}]^+$ : 339.9516 found: 339.9512.

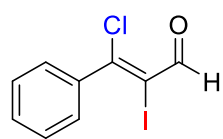

(*E*)-3-chloro-2-iodo-3-phenylacrylaldehyde (**65**). Yellow oil, 43.8 mg, 75% yield.  $^1\text{H}$  NMR (500 MHz, Chloroform-*d*)  $\delta$  9.45 (s, 1H), 7.60 – 7.50 (m, 2H), 7.52 – 7.42 (m, 3H).  $^{13}\text{C}$  NMR (126 MHz, Chloroform-*d*)  $\delta$  186.1, 149.1, 139.9,

130.8, 128.6, 128.5, 103.1. IR (neat,  $\text{cm}^{-1}$ ): 3056, 2863, 1737, 1687, 1555, 1483, 1443, 1217, 1098, 877. HRMS ( $\text{EI}^+$ ) calcd. for  $\text{C}_9\text{H}_6\text{ClIO}$   $[\text{M}]^+$ : 291.9146 found: 291.9148.

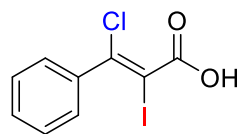

(*E*)-3-chloro-2-iodo-3-phenylacrylic acid (**66**). Yellow solid, 32.0 mg, 52% yield.  $^1\text{H}$  NMR (500 MHz, Chloroform-*d*)  $\delta$  7.51 – 7.47 (m, 2H), 7.47 – 7.41 (m, 3H). (acid peak?)  $^{13}\text{C}$  NMR (126 MHz, Chloroform-*d*)  $\delta$  169.3, 139.0,

137.0, 130.0, 128.6, 128.5, 80.2. IR (neat,  $\text{cm}^{-1}$ ): 2915, 2810, 2633, 2518, 1686, 1574, 1445, 1407, 1264, 912. HRMS ( $\text{EI}^+$ ) calcd. for  $\text{C}_9\text{H}_6\text{ClIO}_2$   $[\text{M}]^+$ : 307.9096 found: 307.9093.

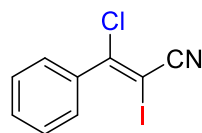

(*E*)-3-chloro-2-iodo-3-phenylacrylonitrile (**67**). Yellow oil, 24.8 mg, 43% yield.  $^1\text{H}$  NMR (400 MHz, Chloroform-*d*)  $\delta$  7.64 – 7.37 (m, 5H).  $^{13}\text{C}$  NMR (101 MHz, Chloroform-*d*)  $\delta$  149.0, 136.9, 131.3, 128.7, 128.6, 116.7, 52.6. IR (neat,  $\text{cm}^{-1}$ ):

2921, 2211, 1599, 1574, 1438, 1218, 1156, 896, 733, 693  $\text{cm}^{-1}$ . HRMS ( $\text{EI}^+$ ) calcd. for  $\text{C}_9\text{H}_5\text{ClIN}$   $[\text{M}]^+$ : 288.9155 found: 288.9162.

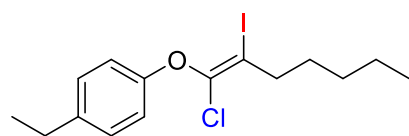

(*E*)-1-((1-chloro-2-iodohept-1-en-1-yl)oxy)-4-ethylbenzene (**68**). Yellow oil, 54.4 mg, 72% yield.  $^1\text{H}$  NMR (400 MHz, Chloroform-*d*)  $\delta$  7.20 (d,  $J$  = 8.5 Hz, 2H), 6.96 (d,  $J$  = 8.5 Hz,

2H), 2.77 – 2.44 (m, 4H), 1.63 (dd,  $J$  = 9.1, 5.5 Hz, 2H), 1.40 (p,  $J$  = 4.0, 3.4 Hz, 4H), 1.26 (t,  $J$  = 7.6 Hz, 3H), 0.96 (t,  $J$  = 6.8 Hz, 3H).  $^{13}\text{C}$  NMR (101 MHz, Chloroform-*d*)  $\delta$  151.8, 140.0, 134.8,

129.0, 116.5, 86.8, 38.9, 30.6, 28.3, 28.2, 22.5, 15.6, 14.1. IR (neat,  $\text{cm}^{-1}$ ):  $\nu = 2958, 2926, 2856, 1604, 1503, 1203, 1166, 1049, 830, 727, 682 \text{ cm}^{-1}$ . HRMS (EI<sup>+</sup>) calcd. for  $\text{C}_{15}\text{H}_{20}\text{ClIO}$  [ $\text{M}$ ]<sup>+</sup>: 378.0247 found: 378.0242.

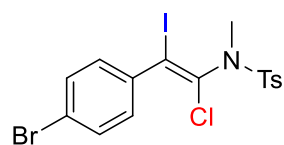

(*E*)-*N*-(2-(4-bromophenyl)-1-chloro-2-iodovinyl)-*N*,4-dimethylbenzenesulfonamide (**69**), Yellow solid, 75mg, 72% yield <sup>1</sup>H NMR (600 MHz, Chloroform-*d*)  $\delta$  7.87 (d,  $J = 8.4$  Hz, 2H), 7.52 (d,  $J = 8.5$  Hz, 2H), 7.36 (d,  $J = 8.5$  Hz, 2H), 7.29 (d,  $J = 8.5$  Hz, 2H), 3.01 (s, 3H), 2.47 (s, 3H). <sup>13</sup>C NMR (151 MHz, Chloroform-*d*)  $\delta$  144.7, 139.7, 134.4, 131.6, 130.4, 129.6, 129.6, 128.8, 123.2, 99.2, 77.3, 77.0, 76.8, 35.1, 21.7. IR (neat,  $\text{cm}^{-1}$ ): 2931, 1574, 1356, 1173, 987, 771, 662, 554  $\text{cm}^{-1}$ . HRMS (ESI<sup>+</sup>) calcd. for  $\text{C}_{16}\text{H}_{14}\text{ClIBrNO}_2\text{SNa}$  [ $\text{M}+\text{Na}$ ]<sup>+</sup>: 547.8560 found: 547.8554.

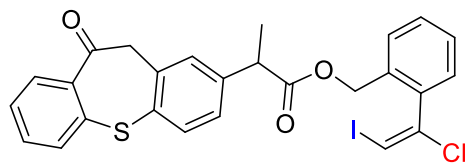

(*E*)-2-(1-chloro-2-iodovinyl)benzyl 2-(10-oxo-10,11-dihydrodibenzo[*b,f*]thiepin-2-yl)propanoate (**70**). Yellow oil, 93.0 mg, 81% yield. <sup>1</sup>H NMR (400 MHz, Chloroform-*d*)  $\delta$  8.23 (dd,  $J = 8.0, 1.5$  Hz, 1H), 7.62 (dd,  $J = 7.9, 4.0$  Hz, 2H), 7.52 – 7.28 (m, 6H), 7.22 (ddd,  $J = 24.7, 7.0, 2.3$  Hz, 2H), 6.79 (s, 1H), 5.16 (d,  $J = 17.2$  Hz, 2H), 4.38 (s, 2H), 3.82 (d,  $J = 7.1$  Hz, 1H), 1.53 (d,  $J = 7.2$  Hz, 3H). <sup>13</sup>C NMR (101 MHz, Chloroform-*d*)  $\delta$  191.3, 173.5, 142.5, 140.2, 137.9, 137.8, 136.2, 133.4, 133.2, 132.9, 132.5, 131.6, 131.5, 130.9, 129.8, 129.3, 129.1, 128.8, 128.7, 126.9, 126.5, 77.7, 64.2, 51.1, 45.2, 18.5. IR (neat,  $\text{cm}^{-1}$ ): 3062, 2928, 1734, 1673, 1587, 1456, 1426, 1284, 1154, 1073, 886, 757, 684  $\text{cm}^{-1}$ . HRMS (ESI<sup>+</sup>) Calculated for  $\text{C}_{26}\text{H}_{21}\text{ClIO}_3\text{S}$  [ $\text{M}+\text{H}$ ]<sup>+</sup>: 574.9944, found 574.9935.



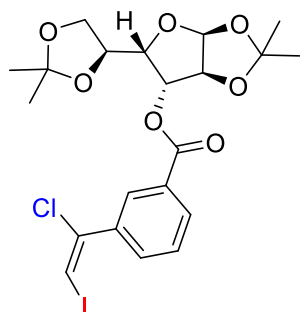

(3aS,5S,6R,6aS)-5-((S)-2,2-dimethyl-1,3-dioxolan-4-yl)-2,2-dimethyltetrahydrofuro[2,3-d][1,3]dioxol-6-yl-3-((E)-1-chloro-2-iodovinyl)benzoate (**71**). Yellow oil, 74.8 mg, 68% yield.  $^1\text{H NMR}$  (400 MHz, Chloroform-*d*)  $\delta$  8.18 (t,  $J = 1.8$  Hz, 1H), 8.12 – 7.89 (m, 1H), 7.75 (dt,  $J = 7.9, 1.4$  Hz, 1H), 7.52 (t,  $J = 7.8$  Hz, 1H), 6.85 (s, 1H), 5.96 (d,  $J = 3.7$  Hz, 1H), 5.50 (d,  $J = 2.9$  Hz, 1H), 4.65 (d,  $J = 3.7$  Hz, 1H), 4.39 (ddd,  $J = 8.1, 5.8, 4.8$  Hz, 1H), 4.32 (dd,  $J = 8.1, 2.9$  Hz, 1H), 4.14 (dd,  $J = 8.6, 5.9$  Hz, 1H), 4.09 (dd,  $J = 8.6, 4.9$  Hz, 1H), 1.61 (s, 3H), 1.42 (s, 3H), 1.32 (s, 3H), 1.27 (s, 3H).  $^{13}\text{C NMR}$  (101 MHz, Chloroform-*d*)  $\delta$  164.5, 138.3, 133.9, 132.8, 130.6, 130.4, 129.8, 128.7, 112.4, 109.5, 105.2, 83.4, 80.0, 74.4, 72.6, 67.4, 26.8, 26.8, 26.2, 25.3. IR (neat,  $\text{cm}^{-1}$ ):  $\nu = 3447, 3069, 2987, 2860, 1729, 1630, 1378, 1234, 1156, 1077, 945, 844, 754, 673$   $\text{cm}^{-1}$ . HRMS (ESI<sup>+</sup>) Calculated for  $\text{C}_{21}\text{H}_{25}\text{ClIO}_7$   $[\text{M}+\text{H}]^+$ : 551.0328, found 551.0325.

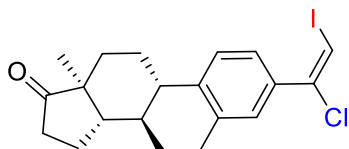

(8R,9S,13S,14S)-3-((E)-1-chloro-2-iodovinyl)-13-methyl-6,7,8,9,11,12,13,14,15,16-decahydro-17H-cyclopenta[a]phenanthren-17-one (**72**). Yellow oil, 63.4 mg, 72% yield.  $^1\text{H NMR}$  (400 MHz, Chloroform-*d*)  $\delta$  7.35 (s, 2H), 7.30 (s, 1H), 6.74 (s, 1H), 3.07 – 2.89 (m, 2H), 2.54 (dd,  $J = 18.8, 8.7$  Hz, 1H), 2.50 – 2.42 (m, 1H), 2.35 (td,  $J = 10.8, 4.3$  Hz, 1H), 2.25 – 1.90 (m, 4H), 1.73 – 1.62 (m, 2H), 1.59 – 1.44 (m, 4H), 0.95 (s, 3H).  $^{13}\text{C NMR}$  (101 MHz, Chloroform-*d*)  $\delta$  141.4, 136.6, 135.0, 134.2, 129.4, 126.4, 125.2, 72.2, 50.5, 48.0, 44.5, 37.9, 35.9, 31.6, 29.3, 26.4, 25.6, 21.6, 13.9. IR (neat,  $\text{cm}^{-1}$ ):  $\nu = 3053, 2918, 2851, 1737, 1402, 1033, 841, 822, 794, 705, 667$   $\text{cm}^{-1}$ . HRMS (ESI<sup>+</sup>) Calculated for  $\text{C}_{20}\text{H}_{23}\text{ClIO}$   $[\text{M}+\text{H}]^+$ : 441.0482, found 441.0479.

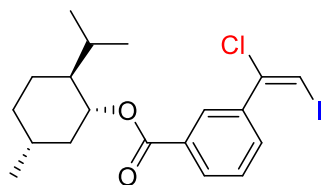

(1R,2S,5R)-2-isopropyl-5-methylcyclohexyl-3-((E)-1-chloro-2-iodovinyl)benzoate (**73**). Yellow oil, 62.4 mg, 70% yield.  $^1\text{H NMR}$  (400 MHz, Chloroform-*d*)  $\delta$  8.24 (s, 1H), 8.09 (d,  $J = 7.8$  Hz, 1H), 7.78 – 7.61 (m, 1H), 7.52 (t,  $J = 7.8$  Hz, 1H), 6.86 (s, 1H), 4.97 (td,  $J = 10.9, 4.4$  Hz, 1H), 2.16 (d,  $J = 12.0$  Hz, 1H), 2.00 (pd,  $J = 7.0, 2.7$  Hz, 1H), 1.82 – 1.69 (m, 2H), 1.62 – 1.53 (m, 2H), 1.27 – 1.05 (m, 3H), 0.95 (dd,  $J = 6.8, 4.3$  Hz, 6H), 0.82 (d,  $J = 6.9$  Hz, 3H).  $^{13}\text{C NMR}$  (101 MHz, Chloroform-*d*)  $\delta$  165.3, 137.9, 133.1, 131.1, 130.5, 130.3, 128.4, 75.3,

73.9, 47.3, 41.0, 34.3, 31.5, 26.5, 23.7, 22.1, 20.8, 16.6. IR (neat,  $\text{cm}^{-1}$ ):  $\nu = 3068, 2954, 2925, 2868, 1717, 1454, 1293, 1237, 1107, 884, 781, 690 \text{ cm}^{-1}$ . HRMS (ESI<sup>+</sup>) Calculated for  $\text{C}_{19}\text{H}_{25}\text{ClIO}_2$   $[\text{M}+\text{H}]^+$ : 447.0588, found 447.0582.

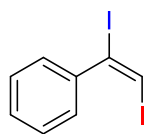

(*E*)-(1,2-diiodovinyl)benzene (**74**).<sup>7</sup> White solid, 53.4 mg, 75% yield. <sup>1</sup>H NMR (400 MHz, Chloroform-*d*)  $\delta$  7.38 – 7.32 (m, 5H), 7.26 (s, 1H). <sup>13</sup>C NMR (100 MHz, Chloroform-*d*)  $\delta$  143.1, 128.9, 128.5, 128.4, 96.1, 80.7.

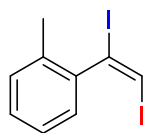

(*E*)-1-(1,2-diiodovinyl)-2-methylbenzene (**75**).<sup>8</sup> Yellow solid, 57.7 mg, 78% yield. <sup>1</sup>H NMR (500 MHz, Chloroform-*d*)  $\delta$  7.32 – 7.23 (m, 3H), 7.21 (ddd,  $J = 7.4, 1.6, 0.8 \text{ Hz}$ , 1H), 7.11 (dd,  $J = 7.4, 1.7 \text{ Hz}$ , 1H), 2.25 (s, 3H). <sup>13</sup>C NMR (126 MHz, Chloroform-*d*)  $\delta$  142.9, 134.5, 130.6, 129.0, 127.6, 126.3, 96.2, 82.8, 19.5.

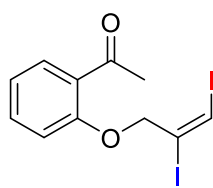

(*E*)-1-(2-((2,3-diiodoallyl)oxy)phenyl)ethan-1-one (**76**). Yellow oil, 59.9 mg, 70% yield. <sup>1</sup>H NMR (500 MHz, Chloroform-*d*)  $\delta$  7.78 (dd,  $J = 7.7, 1.8 \text{ Hz}$ , 1H), 7.47 (ddd,  $J = 8.3, 7.3, 1.9 \text{ Hz}$ , 1H), 7.29 (s, 1H), 7.07 (td,  $J = 7.5, 1.0 \text{ Hz}$ , 1H), 6.94 – 6.83 (m, 1H), 4.85 (d,  $J = 1.0 \text{ Hz}$ , 2H), 2.74 (s, 3H). <sup>13</sup>C NMR (126 MHz, Chloroform-*d*)  $\delta$  199.6, 156.5, 133.5, 130.7, 129.0, 121.7, 112.9, 96.9, 83.4, 75.5, 32.6. IR (neat,  $\text{cm}^{-1}$ ): 3084, 2972, 2918, 1741, 1654, 1592, 1438, 1358, 1226, 1024. HRMS (ESI<sup>+</sup>) Calculated for  $\text{C}_{11}\text{H}_{10}\text{I}_2\text{O}_2$   $[\text{M}]^+$ : 427.8770, found 427.8758.

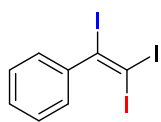

(1,2,2-triiodovinyl)benzene (**77**). Yellow solid, 86.7 mg, 90% yield. <sup>1</sup>H NMR (500 MHz, Chloroform-*d*)  $\delta$  7.43 – 7.30 (m, 3H), 7.29 – 7.22 (m, 2H). <sup>13</sup>C NMR (126 MHz, Chloroform-*d*)  $\delta$  147.7, 128.7, 128.6, 127.4, 112.5, 22.5. IR (neat,  $\text{cm}^{-1}$ ): 3049, 2919, 1972, 1951, 1482, 1439, 1276, 1069, 1027, 859. HRMS (EI<sup>+</sup>) calcd. for  $\text{C}_8\text{H}_5\text{ClI}_2$   $[\text{M}]^+$ : 341.389.8164, found: 389.8163.

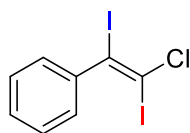

(*E*)-2-chloro-1,2-diiodovinylbenzene (**78**).<sup>9</sup> White solid, 66.3 mg, 85% yield.

<sup>1</sup>H NMR (500 MHz, Chloroform-*d*)  $\delta$  7.42 – 7.32 (m, 3H), 7.32 – 7.22 (m, 2H).

<sup>13</sup>C NMR (126 MHz, Chloroform-*d*)  $\delta$  145.9, 128.9, 128.6, 128.4, 100.5, 73.4.

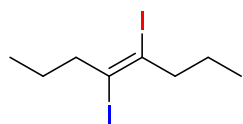

(*E*)-4,5-diiodooct-4-ene (**79**).<sup>8</sup> Colorless oil, 58.2 mg, 80% yield. <sup>1</sup>H NMR

(400 MHz, Chloroform-*d*)  $\delta$  2.75 – 2.38 (m, 4H), 1.59 (h,  $J = 7.4$  Hz, 4H),

0.96 (t,  $J = 7.4$  Hz, 6H). <sup>13</sup>C NMR (100 MHz, Chloroform-*d*)  $\delta$  101.8, 52.3,

21.39, 12.59.

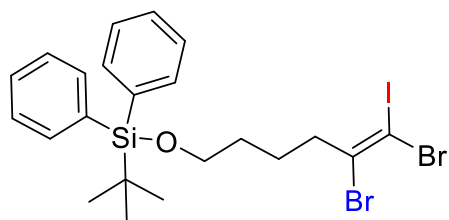

(*E*)-tert-butyl((5,6-dibromo-6-iodohex-5-en-1-yl)oxy)diphenylsilane (**80**). Colorless oil, 102.9 mg, 83% yield.

<sup>1</sup>H NMR (400 MHz, Chloroform-*d*)  $\delta$  7.85 – 7.58 (m, 4H), 7.51 – 7.31 (m, 6H), 3.71 (t,  $J = 6.1$  Hz, 2H), 2.85 – 2.55 (m, 2H), 1.84 – 1.70 (m, 2H), 1.61 (dt,  $J = 8.6, 6.0$  Hz, 2H),

1.07 (s, 9H). <sup>13</sup>C NMR (100 MHz, Chloroform-*d*)  $\delta$  135.5, 133.8, 131.0, 129.5, 127.5, 63.2, 49.5, 44.5, 31.1, 26.8, 24.1, 19.1. IR (neat, cm<sup>-1</sup>): 3074, 2934, 2857, 1473, 1427, 1111, 1006, 825, 742, 700. HRMS (EI<sup>+</sup>) calcd. for C<sub>22</sub>H<sub>27</sub>Br<sub>2</sub>IOSi [M-(H-<sup>t</sup>Bu)+H]<sup>+</sup> : 562.8539, found:562.8530.

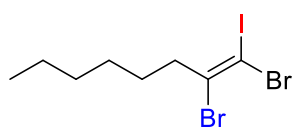

(*E*)-1,2-dibromo-1-iodooct-1-ene (**81**). Colorless oil, 63.8 mg, 81% yield.

<sup>1</sup>H NMR (500 MHz, Chloroform-*d*)  $\delta$  2.74 – 2.56 (m, 2H), 1.62 (dq,  $J = 12.3, 7.6, 7.2$  Hz, 2H), 1.44 – 1.26 (m, 6H), 1.02 – 0.74 (m, 3H). <sup>13</sup>C NMR

(126 MHz, Chloroform-*d*)  $\delta$  131.3, 49.2, 44.9, 31.5, 28.1, 27.7, 22.5, 14.0. IR (neat, cm<sup>-1</sup>): 2955, 2920, 2855, 1644, 1456, 1376, 1278, 1125, 777, 724. HRMS (EI<sup>+</sup>) calcd. for C<sub>8</sub>H<sub>13</sub>Br<sub>2</sub>I [M]<sup>+</sup>: 393.8423, found: 393.8420.

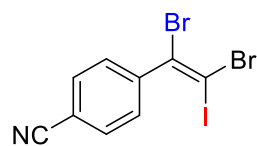

(*E*)-4-(1,2-dibromo-2-iodovinyl)benzonitrile (**82**). Yellow solid, 68.6mg, 84% yield.  $^1\text{H}$  NMR (400 MHz, Chloroform-*d*)  $\delta$  7.68 (d,  $J = 8.2$  Hz, 2H), 7.45 (d,  $J = 8.2$  Hz, 2H).  $^{13}\text{C}$  NMR (101 MHz, Chloroform-*d*)  $\delta$  146.3, 132.6, 129.7, 123.6, 118.1, 113.1, 55.2. IR (neat,  $\text{cm}^{-1}$ ): 2916.2221.1402.1600.1017.833.788. HRMS ( $\text{EI}^+$ ) calcd. for  $\text{C}_9\text{H}_4\text{Br}_2\text{I}$  [ $\text{M}$ ] $^+$ : 410.7755, found: 410.7750.

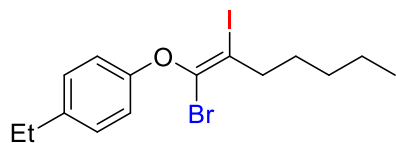

(*E*)-1-((1-bromo-2-iodohex-1-en-1-yl)oxy)-4-ethylbenzene (**83**). Yellow oil, 60.4 mg, 74% yield.  $^1\text{H}$  NMR (400 MHz, Chloroform-*d*)  $\delta$  7.20 (d,  $J = 7.9$  Hz, 2H), 6.97 (d,  $J = 7.4$  Hz, 2H), 2.64 (q,  $J = 7.5$  Hz, 4H), 1.64 (p,  $J = 7.4$  Hz, 2H), 1.40 (s, 4H), 1.26 (t,  $J = 7.6$  Hz, 3H), 0.97 (t,  $J = 6.4$  Hz, 3H).  $^{13}\text{C}$  NMR (101 MHz, Chloroform-*d*)  $\delta$  151.9, 140.1, 129.0, 125.5, 116.7, 88.4, 40.7, 30.6, 28.2, 28.2, 22.5, 15.6, 14.0. IR (neat,  $\text{cm}^{-1}$ ):  $\nu = 2958, 2926, 2856, 1636, 1604, 1503, 1460, 1203, 1049, 830, 727, 682$   $\text{cm}^{-1}$ . HRMS ( $\text{EI}^+$ ) calcd. for  $\text{C}_{15}\text{H}_{20}\text{BrIO}$  [ $\text{M}$ ] $^+$ : 421.9742, found: 421.9740.

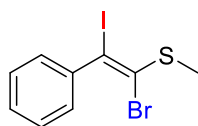

(*E*)-1-bromo-2-iodo-2-phenylvinyl(methyl)sulfane (**84**). Yellow oil, 60 mg, 85% yield.  $^1\text{H}$  NMR (400 MHz, Chloroform-*d*)  $\delta$  7.40 – 7.25 (m, 5H), 2.54 (s, 3H).  $^{13}\text{C}$  NMR (101 MHz,  $\text{CDCl}_3$ )  $\delta$  144.7, 128.7, 128.4, 128.3, 118.7, 94.9, 20.6. HRMS ( $\text{EI}^+$ ) calcd. for  $\text{C}_9\text{H}_8\text{BrIS}$  [ $\text{M}$ ] $^+$ : 353.8575, found: 353.8570.

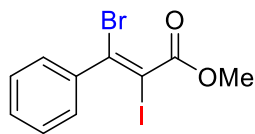

methyl (*E*)-3-bromo-2-iodo-3-phenylacrylate (**85**).<sup>10</sup> Yellow oil, 50 mg, 70% yield.  $^1\text{H}$  NMR (400 MHz, Chloroform-*d*)  $\delta$  7.57 – 7.25 (m, 5H), 3.92 (s, 3H).  $^{13}\text{C}$  NMR (100 MHz, Chloroform-*d*)  $\delta$  166.2, 140.6, 129.7, 128.6, 128.5, 123.1, 81.6, 53.5. IR (neat,  $\text{cm}^{-1}$ ): 2951, 2253, 1726, 1613, 1432, 1243, 1205, 1017, 907, 727. MS ( $\text{EI}^+$ ) calcd. for  $\text{C}_{10}\text{H}_8\text{BrIO}_2$ : 365.9, found: 365.9.

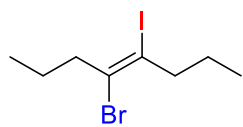

(*E*)-4-bromo-5-iodooct-4-ene (**86**).<sup>10</sup> Colorless oil, 44.2 mg, 70% yield. <sup>1</sup>H NMR (500 MHz, Chloroform-*d*)  $\delta$  2.75 – 2.70 (m, 2H), 2.69 – 2.65 (m, 2H), 1.86 – 1.36 (m, 4H), 1.01 – 0.90 (m, 6H). <sup>13</sup>C NMR (126 MHz, Chloroform-*d*)  $\delta$  122.6, 99.8, 47.5, 46.9, 21.6, 21.0, 13.0, 12.8. IR (neat, cm<sup>-1</sup>): 2962, 2932, 2873, 1461, 1428, 1379, 1111, 1090, 885, 745. HRMS (EI<sup>+</sup>) calcd. for C<sub>8</sub>H<sub>14</sub>BrI [M]<sup>+</sup>: 315.9318, found: 315.9315.

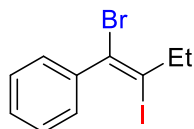

(*E*)-(1-bromo-2-iodobut-1-en-1-yl)benzene (**87**).<sup>10</sup> Yellow oil, 50.4 mg, 75% yield. <sup>1</sup>H NMR (400 MHz, Chloroform-*d*)  $\delta$  7.48 – 7.27 (m, 5H), 2.87 (q, *J* = 7.4 Hz, 2H), 1.19 (t, *J* = 7.4 Hz, 3H). <sup>13</sup>C NMR (101 MHz, Chloroform-*d*)  $\delta$  143.9, 129.1, 128.6, 128.4, 116.8, 103.7, 39.4, 12.9. IR (neat, cm<sup>-1</sup>):  $\nu$  = 3050, 2972, 2933, 2872, 1594, 1544, 1104, 1069, 875, 758, 690 cm<sup>-1</sup>. HRMS (EI<sup>+</sup>) calcd. for C<sub>10</sub>H<sub>10</sub>BrI [M]<sup>+</sup>: 335.9011, found: 335.9009.

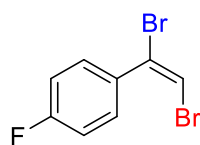

(*E*)-1-(1,2-dibromovinyl)-4-fluorobenzene (**88**).<sup>11</sup> Yellow oil, 25 mg, 45% yield. <sup>1</sup>H NMR (600 MHz, Chloroform-*d*)  $\delta$  7.51 (dd, *J* = 8.8, 5.2 Hz, 2H), 7.08 (t, *J* = 8.7 Hz, 2H), 6.80 (s, 1H). <sup>13</sup>C NMR (151 MHz, Chloroform-*d*)  $\delta$  162.9 (d, *J* = 250.5 Hz), 133.1 (d, *J* = 3.7 Hz), 131.3 (d, *J* = 8.4 Hz), 120.2, 115.4 (d, *J* = 22.1 Hz), 103.4. MS (EI) calcd. for C<sub>8</sub>H<sub>5</sub>FBr<sub>2</sub>: 277.9, found: 277.9.

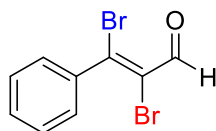

(*E*)-2,3-dibromo-3-phenylacrylaldehyde (**89**).<sup>12</sup> Yellow oil, 47.8 mg, 83% yield. <sup>1</sup>H NMR (500 MHz, Chloroform-*d*)  $\delta$  10.00 (s, 1H), 7.54 – 7.50 (m, 2H), 7.49 – 7.44 (m, 3H). <sup>13</sup>C NMR (126 MHz, Chloroform-*d*)  $\delta$  185.9, 139.2, 137.5, 130.6, 128.5, 128.5, 120.8. IR (neat, cm<sup>-1</sup>): 3056, 2869, 1678, 1562, 1486, 1443, 1377, 1214, 1108, 717. HRMS (EI<sup>+</sup>) calcd. for C<sub>9</sub>H<sub>6</sub>Br<sub>2</sub>O [M]<sup>+</sup>: 287.8785, found: 287.8776.

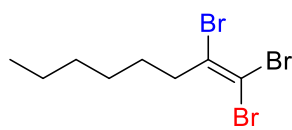

1,1,2-tribromooct-1-ene (**90**). Colorless oil, 62.9 mg, 91% yield. <sup>1</sup>H NMR (400 MHz, Chloroform-*d*)  $\delta$  2.79 – 2.50 (m, 2H), 1.73 – 1.54 (m, 2H), 1.30 (p, *J* = 4.3, 3.3 Hz, 6H), 0.98 – 0.81 (m, 3H). <sup>13</sup>C NMR (100 MHz, Chloroform-*d*)  $\delta$  129.7, 86.7, 40.8, 31.3, 28.0, 27.4, 22.4, 14.0. IR (neat, cm<sup>-1</sup>): 2955,

2926, 2857, 1455, 1378, 1125, 824, 802, 755, 724. HRMS (EI<sup>+</sup>) calcd. for C<sub>8</sub>H<sub>13</sub>Br<sub>3</sub> [M]<sup>+</sup>: 345.8542, found: 345.8538.

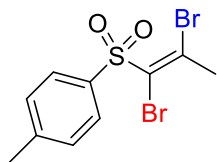

(*E*)-1-((1,2-dibromoprop-1-en-1-yl)sulfonyl)-4-methylbenzene (**91**).

White solid, 50.7 mg, 72% yield. <sup>1</sup>H NMR (500 MHz, Chloroform-*d*) δ 7.92 (d, *J* = 8.4 Hz, 2H), 7.37 (d, *J* = 7.8 Hz, 2H), 2.61 (s, 3H), 2.47 (s, 3H). <sup>13</sup>C NMR (126 MHz, Chloroform-*d*) δ 145.4, 129.7, 128.8, 128.6, 120.9, 33.3, 21.8. IR (neat, cm<sup>-1</sup>): 2932, 1922, 1595, 1560, 1327, 1305, 1153, 1080, 871, 811. HRMS (EI<sup>+</sup>) calcd. for C<sub>10</sub>H<sub>10</sub>Br<sub>2</sub>O<sub>2</sub>S [M]<sup>+</sup>: 351.8763, found: 351.8762.

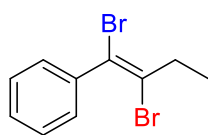

(*E*)-(1,2-dibromobut-1-en-1-yl)benzene (**92**).<sup>11</sup> Yellow oil, 35 mg, 61% yield.

<sup>1</sup>H NMR (600 MHz, Chloroform-*d*) δ 7.43 – 7.32 (m, 5H), 2.90 (q, *J* = 7.4 Hz, 2H), 1.27 (t, *J* = 7.4 Hz, 3H). <sup>13</sup>C NMR (151 MHz, Chloroform-*d*) δ 140.9, 129.1, 128.6, 128.2, 124.9, 115.6, 35.1, 12.1. MS (EI) calcd. for C<sub>10</sub>H<sub>10</sub>Br<sub>2</sub>: 287.9, found: 287.9.

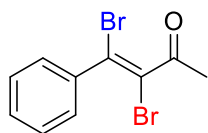

(*E*)-3,4-dibromo-4-phenylbut-3-en-2-one (**93**).<sup>13</sup> Colorless oil, 41.7 mg, 69% yield. <sup>1</sup>H NMR (500 MHz, Chloroform-*d*) δ 7.45 – 7.28 (m, 5H), 2.05 (s, 3H).

<sup>13</sup>C NMR (126 MHz, Chloroform-*d*) δ 195.4, 138.5, 132.9, 130.3, 128.8, 128.7, 124.6, 29.3. IR (neat, cm<sup>-1</sup>): 3062, 2920, 2852, 1701, 1568, 1487, 1443, 1353, 1228, 1186. HRMS (EI<sup>+</sup>) calcd. for C<sub>10</sub>H<sub>8</sub>Br<sub>2</sub>O [M]<sup>+</sup>: 301.8942, found: 301.8932.

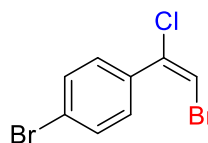

(*E*)-1-bromo-4-(2-bromo-1-chlorovinyl)benzene (**94**). Yellow oil, 28.2 mg, 48% yield.

<sup>1</sup>H NMR (400 MHz, Chloroform-*d*) δ 7.57 (d, *J* = 8.6 Hz, 2H), 7.48 (d, *J* = 8.5 Hz, 2H), 6.67 (s, 1H). <sup>13</sup>C NMR (101 MHz, Chloroform-*d*) δ 134.4, 131.7, 131.5, 130.6, 123.8, 102.5. IR (neat, cm<sup>-1</sup>): ν = 3072, 2923, 2854, 1505, 1477, 1066, 1008, 880, 824, 777, 725, 672, 626, cm<sup>-1</sup>. HRMS (EI<sup>+</sup>) calcd. for C<sub>8</sub>H<sub>5</sub>Br<sub>2</sub>Cl [M]<sup>+</sup>: 293.8447, found: 293.8445.

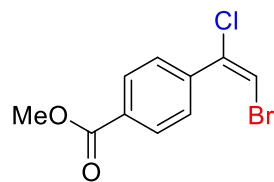

Methyl (*E*)-4-(2-bromo-1-chlorovinyl)benzoate (**95**). Yellow oil, 27.4 mg, 50% yield.  $^1\text{H}$  NMR (500 MHz, Chloroform-*d*)  $\delta$  8.08 (d,  $J = 8.7$  Hz, 2H), 7.66 (d,  $J = 8.7$  Hz, 2H), 6.71 (s, 1H), 3.95 (s, 3H).  $^{13}\text{C}$  NMR (100 MHz, Chloroform-*d*)  $\delta$  165.9, 139.4, 131.4, 130.5, 129.1, 128.6, 102.9, 52.0. IR (neat,  $\text{cm}^{-1}$ ):  $\nu = 3078, 2950, 1719, 1607, 1434, 1270, 1160, 771, 730, 697$ . HRMS ( $\text{EI}^+$ ) calcd. for  $\text{C}_{10}\text{H}_8\text{BrClO}_2$   $[\text{M}]^+$ : 273.9396, found: 273.9389.

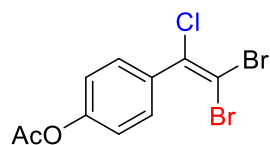

4-(2,2-Dibromo-1-chlorovinyl)phenyl acetate (**96**). Yellow oil, 66.1 mg, 94% yield.  $^1\text{H}$  NMR (500 MHz, Chloroform-*d*)  $\delta$  7.48 (d,  $J = 8.7$  Hz, 2H), 7.14 (d,  $J = 8.8$  Hz, 2H), 2.32 (s, 3H).  $^{13}\text{C}$  NMR (126 MHz, Chloroform-*d*)  $\delta$  169.0, 151.2, 134.6, 133.4, 130.2, 121.6, 89.6, 21.2. IR (neat,  $\text{cm}^{-1}$ ): 2936, 1769, 1505, 1369, 1160, 1020, 898, 850, 791, 724. HRMS ( $\text{EI}^+$ ) calcd. for  $\text{C}_{10}\text{H}_7\text{Br}_2\text{ClO}_2$   $[\text{M}]^+$ : 351.8496, found: 351.8491.

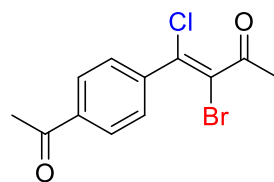

(*E*)-4-(4-acetylphenyl)-3-bromo-4-chlorobut-3-en-2-one (**97**). White solid, 24.6 mg, 41% yield.  $^1\text{H}$  NMR (400 MHz, Chloroform-*d*)  $\delta$  8.01 (d,  $J = 8.1$  Hz, 2H), 7.62 (d,  $J = 8.2$  Hz, 2H), 2.63 (s, 3H), 2.57 (s, 3H).  $^{13}\text{C}$  NMR (100 MHz, Chloroform-*d*)  $\delta$  196.9, 195.0, 140.6, 137.6, 129.0, 128.2, 116.0, 28.4, 26.6. IR (neat,  $\text{cm}^{-1}$ ): 3009, 2915, 1713, 1683, 1599, 1401, 1358, 1268, 1195, 857. HRMS ( $\text{EI}^+$ ) calcd. for  $\text{C}_{12}\text{H}_{10}\text{BrClO}$   $[\text{M}]^+$ : 299.9553, found: 299.9548.

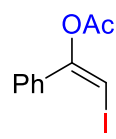

(*E*)-2-iodo-1-phenylvinyl acetate (**98**).<sup>14</sup> Colorless oil, 31.6 mg, 55% yield.  $^1\text{H}$  NMR (400 MHz, Chloroform-*d*)  $\delta$  7.66 – 7.46 (m, 2H), 7.38 (dd,  $J = 5.1, 2.1$  Hz, 3H), 6.34 (s, 1H), 2.15 (s, 3H).  $^{13}\text{C}$  NMR (101 MHz, Chloroform-*d*)  $\delta$  168.5, 151.2, 134.5, 129.5, 128.9, 128.2, 67.1, 20.8.

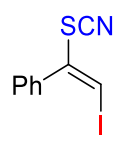

(*E*)-(2-iodo-1-thiocyanatovinyl)benzene (**99**).<sup>15</sup> Colorless oil, 25.7 mg, 45% yield.  $^1\text{H}$  NMR (600 MHz, Chloroform-*d*)  $\delta$  7.53 – 7.43 (m, 5H), 7.28 (s, 1H).  $^{13}\text{C}$  NMR (101 MHz, Chloroform-*d*)  $\delta$  136.0, 131.0, 130.3, 129.1, 129.0, 109.3, 81.3.

### 13. Synthesis of 100

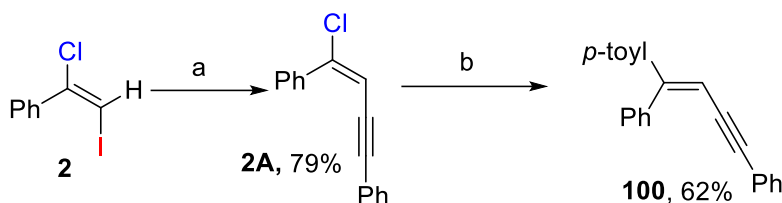

**Sonogashira coupling.** A mixture of **2** (52.8 mg, 0.2 mmol), phenylacetylene (28.6 mg, 0.28 mmol), Pd(PPh<sub>3</sub>)Cl<sub>2</sub> (7 mg, 5 mol%) and CuI (5.7 mg, 15 mol%) in dry toluene (0.6 mL) was added Et<sub>3</sub>N (0.1 mL, 0.9 mmol). After stirring overnight at 80 °C under nitrogen, the reaction mixture was filtered through celite and the solvent was removed by rotary evaporation. The resulting residue was purified by chromatography on silica gel to give the desired product **2A** (37.6 mg, 79%). <sup>1</sup>H NMR (400 MHz, Chloroform-*d*) δ 7.99 (d, *J* = 8.4 Hz, 2H), 7.51 – 7.37 (m, 5H), 7.36 – 7.29 (m, 3H), 6.31 (s, 1H). <sup>13</sup>C NMR (100 MHz, Chloroform-*d*) δ 143.0, 136.1, 131.4, 129.7, 128.6, 128.6, 128.4, 128.4, 127.9, 123.0, 108.3, 94.7, 86.3. HRMS (EI<sup>+</sup>) calcd. for C<sub>16</sub>H<sub>11</sub>Cl: 238.0549, found: 238.0546.

**Suzuki coupling.** A mixture of **2A** (23.8 mg, 0.1 mmol), *p*-Me-C<sub>6</sub>H<sub>4</sub>B(OH)<sub>2</sub> (20.4 mg, 0.15 mmol), Pd(OAc)<sub>2</sub> (2.3 mg, 10 mol%) and Cs<sub>2</sub>CO<sub>3</sub> (65 mg, 0.2 mmol) in dry 1,4-dioxane (1 mL) was stirred at 90 °C under nitrogen for 8 h. After the completion of the reaction, the reaction mixture was filtered through celite and the solvent was removed by rotary evaporation. The resulting residue was purified by chromatography on silica gel to give the desired products **100** (18.2 mg, 62%).

<sup>1</sup>H NMR (400 MHz, Chloroform-*d*) δ 7.54 (d, *J* = 5.9 Hz, 2H), 7.46 – 7.36 (m, 3H), 7.30 – 7.19 (m, 7H), 7.14 (d, *J* = 7.9 Hz, 2H), 6.21 (s, 1H), 2.37 (s, 3H). <sup>13</sup>C NMR (100 MHz, Chloroform-*d*) δ 152.7, 139.3, 138.5, 138.3, 131.3, 130.2, 129.0, 128.2, 128.1, 127.9, 123.7, 106.2, 93.3, 89.3, 21.2. HRMS (EI<sup>+</sup>) calcd. for C<sub>23</sub>H<sub>18</sub>: 294.1409, found: 294.1414.

### 14. Synthesis of 101

To a 20 mL vial equipped a stirring bar, **55** (61.8 mg, 0.2 mmol), 77% *m*CPBA (90 mg, 0.4 mmol), and DCM (4 mL) were added at room temperature. Then the reaction mixture was stirred at room temperature for 3 hours and then saturated NaHCO<sub>3</sub> (15 mL) was added. The resulting mixture was extracted with DCM (3 × 20 mL). The combined organic extracts were concentrated under



reduced pressure and purified by flash chromatography on silica gel to give the desired product **101** (54.5 mg, 80%).

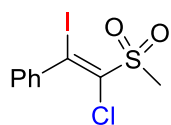

(*E*)-(2-chloro-1-iodo-2-(methylsulfonyl)vinyl)benzene (**101**). White solid, 27.3 mg, 80% yield.  $^1\text{H}$  NMR (400 MHz, Chloroform-*d*)  $\delta$  7.45 – 7.38 (m, 2H), 7.38 – 7.31 (m, 1H), 7.32 – 7.24 (m, 2H), 3.32 (s, 3H).  $^{13}\text{C}$  NMR (151 MHz, Chloroform-*d*)  $\delta$  143.0, 130.4, 129.6, 128.6, 127.2, 101.0, 40.9. IR (neat,  $\text{cm}^{-1}$ ): 3008, 2929, 1559, 1479, 1323, 1147, 978, 757, 706, 510  $\text{cm}^{-1}$ . HRMS (EI $^+$ ) calcd. for  $\text{C}_9\text{H}_8\text{ClIO}_2\text{S}$  [M] $^+$ : 341.8978, found: 341.8973.

## 15. Synthesis of **58**

To a solution of ester **42** (67.2 mg, 0.2 mmol, 1.0 eq) in DCM (2 mL) at 0 °C was added diisobutylaluminum hydride as a 1 M solution in hexanes (0.5 mL, 0.5 mmol). The reaction was warmed to room temperature and stirred for 2 h. Methanol (1 mL) was carefully added dropwise to quench the reaction. Ether (5 mL) and a saturated solution of Rochelle's salt (3 mL) were then introduced, and the resulting mixture was stirred until both layers became clear. The layers were separated, and the organic phase was dried over  $\text{NaSO}_4$ , filtered, and concentrated. Purification by column chromatography on silica gel eluting with 10 % EtOAc in hexanes gave the desired compound **58** (43mg,74%).

Using the same procedure, Aldehyde **65** could also be reduced to compound **58** (45.7mg, 78%)

## 16. Synthesis of **102**

A mixture of **59** (0.2 mmol, 58 mg),  $\text{Zn}(\text{CN})_2$  (0.2mmol, 23 mg) and  $\text{CuI}$  ( 0.24 mmol, 45 mg) in DMF 1 mL was stirred at 100 °C for 12 h. Upon completion, the reaction mixture was diluted with EtOAc ( 4ml ), filtered through a short of silica gel. The organic oil was added to a saturated aqueous solution and washed with EtOAc (3 x 15 mL). The combined organic extracts were concentrated under reduced pressure and purified by flash chromatography on silica gel to give the desired product **102** (33.4 mg, 89%).

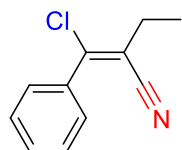

(*E*)-2-(chloro(phenyl)methylene)butanenitrile (**102**). Colorless oil, 33.4 mg, 89% yield.  $^1\text{H}$  NMR (400 MHz, Chloroform-*d*)  $\delta$  7.75 – 7.50 (m, 2H),  $\delta$  7.45 – 7.49 (m, 3H) 2.62 (q,  $J = 7.6$  Hz, 2H), 1.28 (t,  $J = 7.5$  Hz, 3H).  $^{13}\text{C}$  NMR (101 MHz,  $\text{CDCl}_3$ )  $\delta$  148.5, 136.2, 130.7, 128.6, 128.5, 117.5, 113.7, 77.4, 77.1, 76.8, 26.3, 11.8. IR (neat,  $\text{cm}^{-1}$ ): 2976, 2160, 1605, 1450, 1402, 906, 755, 693  $\text{cm}^{-1}$ . MS (EI) calcd. for  $\text{C}_{11}\text{H}_{10}\text{ClN}$ : 191.1, found: 191.1.

## 17. Synthesis of **103**

A mixture of **74** (0.2 mmol, 71 mg), 3-butyn-1-ol (0.4 mmol, 28 mg),  $\text{Pd}(\text{OAc})_2$  (5 mol%, 2.2 mg),  $\text{CuI}$  (5 mol%, 2 mg),  $\text{Et}_3\text{N}$  (0.2 mL), and THF (0.8 mL) was stirred under an argon atmosphere at rt for 24 h. Upon complete consumption of the starting material, the reaction mixture was filtered and evaporated. The residue was purified by flash column chromatography to afford products **103** (26.5 mg, 78% yield).

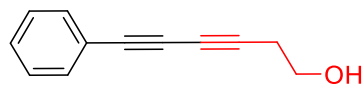

6-Phenylhexa-3,5-diyne-1-ol (**103**). Colorless oil, 26.5 mg, 78% yield.  $^1\text{H}$  NMR (400 MHz, Chloroform-*d*)  $\delta$  7.65 – 7.41 (m, 2H), 7.36 – 7.27 (m, 3H), 3.79 (t,  $J = 6.3$  Hz, 2H), 2.63 (t,  $J = 6.3$  Hz, 2H).  $^{13}\text{C}$  NMR (101 MHz,  $\text{CDCl}_3$ )  $\delta$  132.6, 129.1, 128.4, 121.8, 81.1, 75.4, 74.0, 66.8, 60.8, 24.0. IR (neat,  $\text{cm}^{-1}$ ): 3324, 2285, 1489, 1414, 1375, 1036, 946, 752, 686, 542  $\text{cm}^{-1}$ . MS (EI) calcd. for  $\text{C}_{12}\text{H}_{10}\text{O}$ : 170.2, found: 170.2.

## 18. Synthesis of **104**

A mixture of **74** (0.2 mmol, 71 mg), 2-Ethynylphenol (0.4 mmol, 47 mg),  $\text{Pd}(\text{OAc})_2$  (2 mol%, 1 mg),  $\text{CuI}$  (5 mol%, 2 mg),  $\text{Et}_3\text{N}$  (0.2 mL), and THF (0.8 mL) was stirred under an argon atmosphere at r.t. for 18 h. Then heat to 100°C for 6 h. Upon complete consumption of the starting material, the mixture was filtered and evaporated, the residue was purified by flash column chromatography to afford products **104** (26.1 mg, 61% yield).

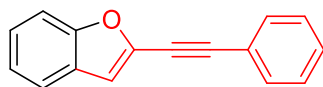

2-(Phenylethynyl)benzofuran (**104**), colorless oil, 26.6 mg, 61% yield.  $^1\text{H}$  NMR (600 MHz, Chloroform-*d*)  $\delta$  7.71 – 7.64 (m, 3H), 7.58

(dq,  $J = 8.3, 0.9$  Hz, 1H), 7.50 – 7.46 (m, 3H), 7.46 – 7.41 (m, 1H), 7.37 – 7.29 (m, 1H), 7.11 (s, 1H).  $^{13}\text{C}$  NMR (151 MHz, Chloroform- $d$ )  $\delta$  154.9, 138.8, 131.7, 129.2, 128.5, 127.8, 125.6, 123.3, 121.9, 121.2, 111.6, 111.3, 95.1, 79.7. IR (neat,  $\text{cm}^{-1}$ ): 3060, 2923, 1596, 1441, 1145, 970, 855, 734, 687, 645  $\text{cm}^{-1}$ . MS (EI) calcd. for  $\text{C}_{16}\text{H}_{10}\text{O}$ : 218.1, found: 218.1.

## 19. Synthesis of **105**

To a well-stirred solution of **85** (73mg, 0.2mmol), in aqueous-acetonitrile (3:1, 1.2ml) was added dropwise a solution of Oxone (0.14mmol) in water (1.2ml). Stirring was continued and the reaction was monitored by TLC. Upon completion of the reaction, the mixture was diluted with chilled water. The resultant sulfoxide was extracted with ethyl acetate. The combined organic extracts were concentrated under reduced pressure and purified by flash chromatography on silica gel to give the desired product **105** (54 mg, 71%).

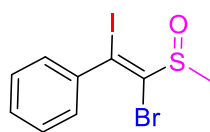

(*E*)-(2-bromo-1-iodo-2-(methylsulfinyl)vinyl)benzene (**105**). White solid, 54 mg, 71% yield.  $^1\text{H}$  NMR (400 MHz, Chloroform- $d$ )  $\delta$  7.64 – 6.87 (m, 5H), 2.65 (s, 3).  $^{13}\text{C}$  NMR (101 MHz, Chloroform- $d$ )  $\delta$  142.0, 131.3, 129.6, 128.6, 128.2, 99.3, 39.0. IR (neat,  $\text{cm}^{-1}$ ): 2915, 2854, 1596, 1727, 1296, 1064, 943, 693  $\text{cm}^{-1}$ . HRMS ( $\text{EI}^+$ ) calcd. for  $\text{C}_9\text{H}_8\text{BrIOS}$   $[\text{M}]^+$ : 369.8524, found: 369.8519.

## 20. Structure assignment of compound 18

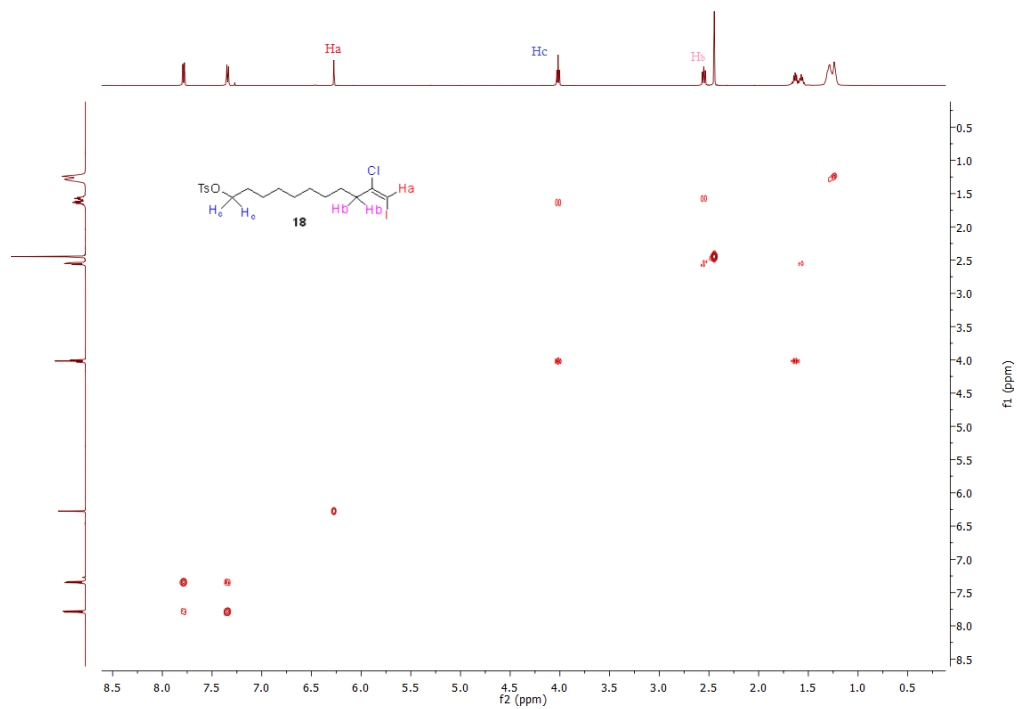

Figure S1. COSY of 18

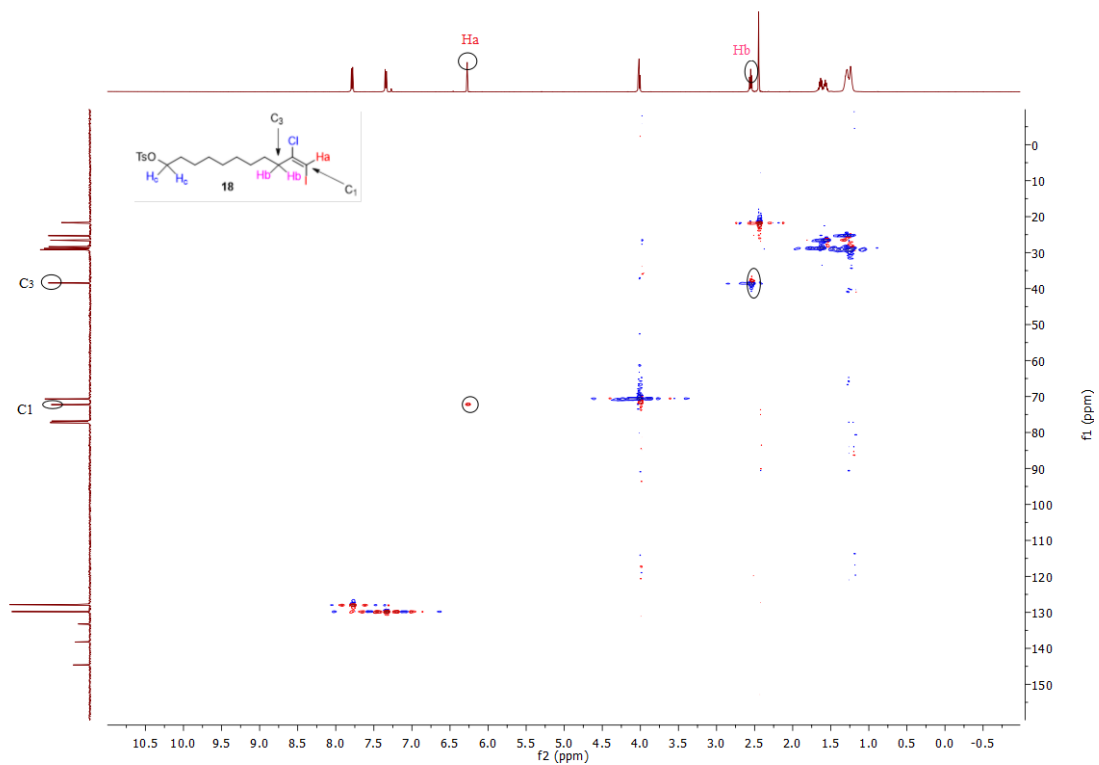

Figure S2. HSQC of 18

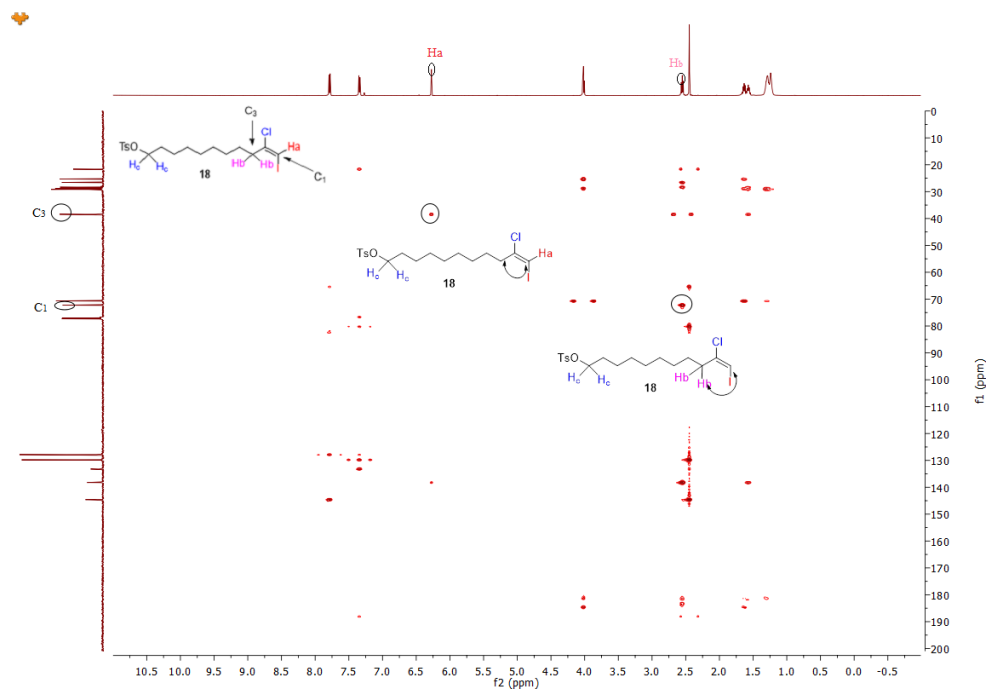

**Figure S3. HMBC of 18.**

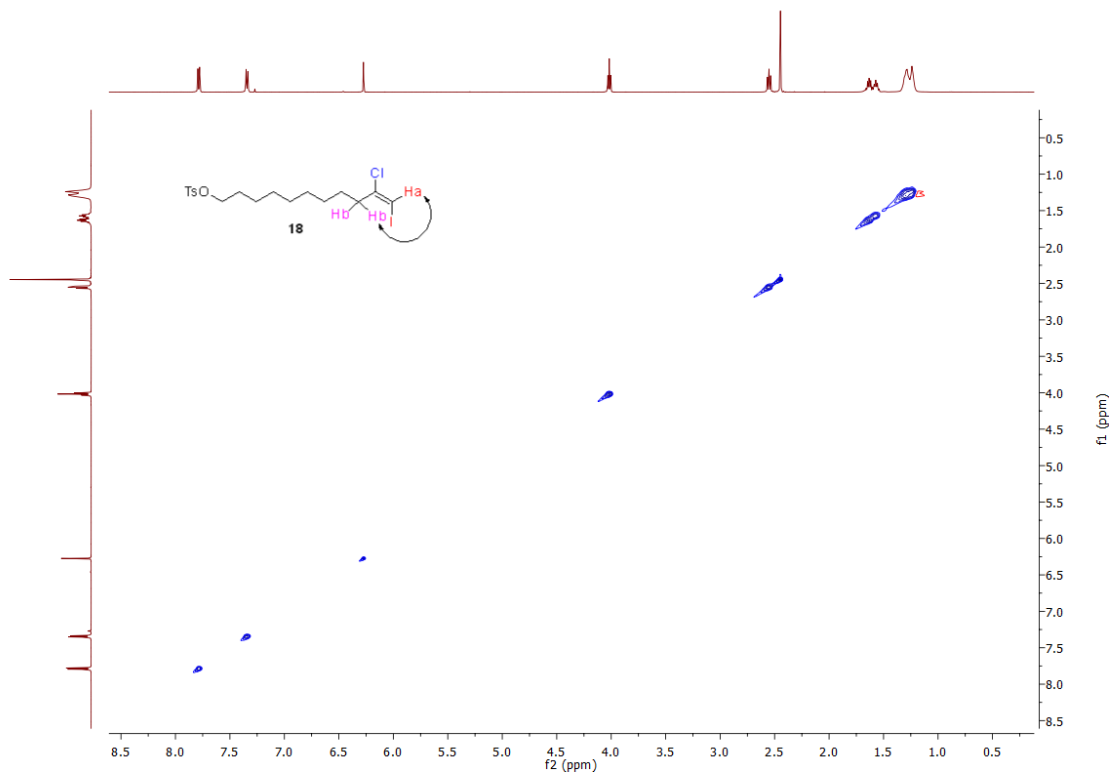

**Figure S4. NOSEY of 18.**

The assignment of C<sub>3</sub> and C<sub>1</sub> were confirmed as indicated by the observation of a <sup>1</sup>H-<sup>13</sup>C HSQC interaction (Figure S2). The interaction was observed between the H<sub>a</sub> and C<sub>3</sub> as well as H<sub>c</sub> and C<sub>1</sub> in the <sup>1</sup>H-<sup>13</sup>C HMBC experiment (Figure 3) which indicated that the C<sub>1</sub> substituted with iodine. According to Zhu's report<sup>16</sup>, the NOE effect was detected for the *Z*-1,2-dihaloalkenes compounds; in contrast, no enhancements were observed for the *E*-1,2-dihaloalkenes. Similarly, we have not observed the cross peak between the H<sub>b</sub> and H<sub>a</sub> in NOESY of **18** (Figure S4).

## 21. Structure assignment of compound 62

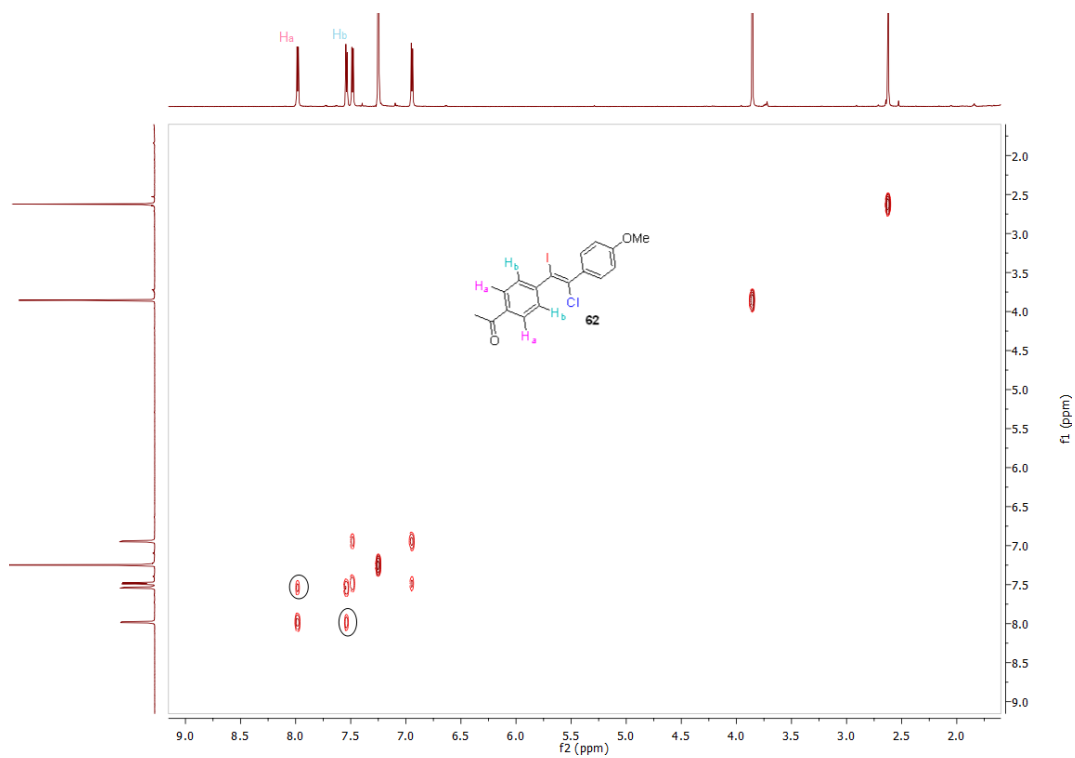

Figure S5. COSY of 62

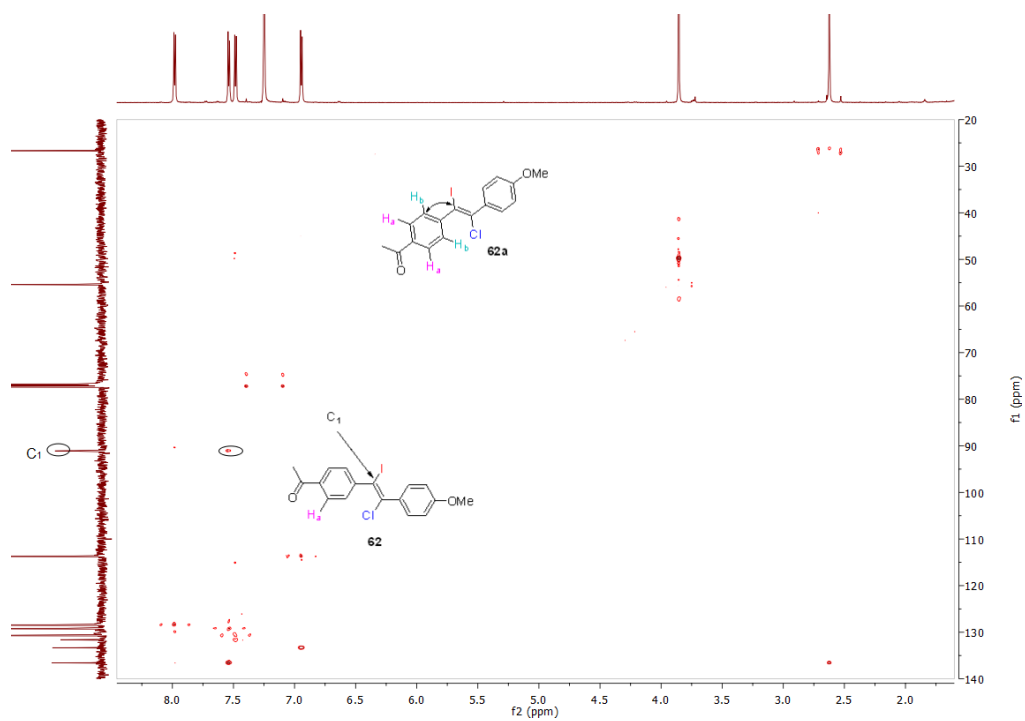

Figure S6. HMBC of 62.

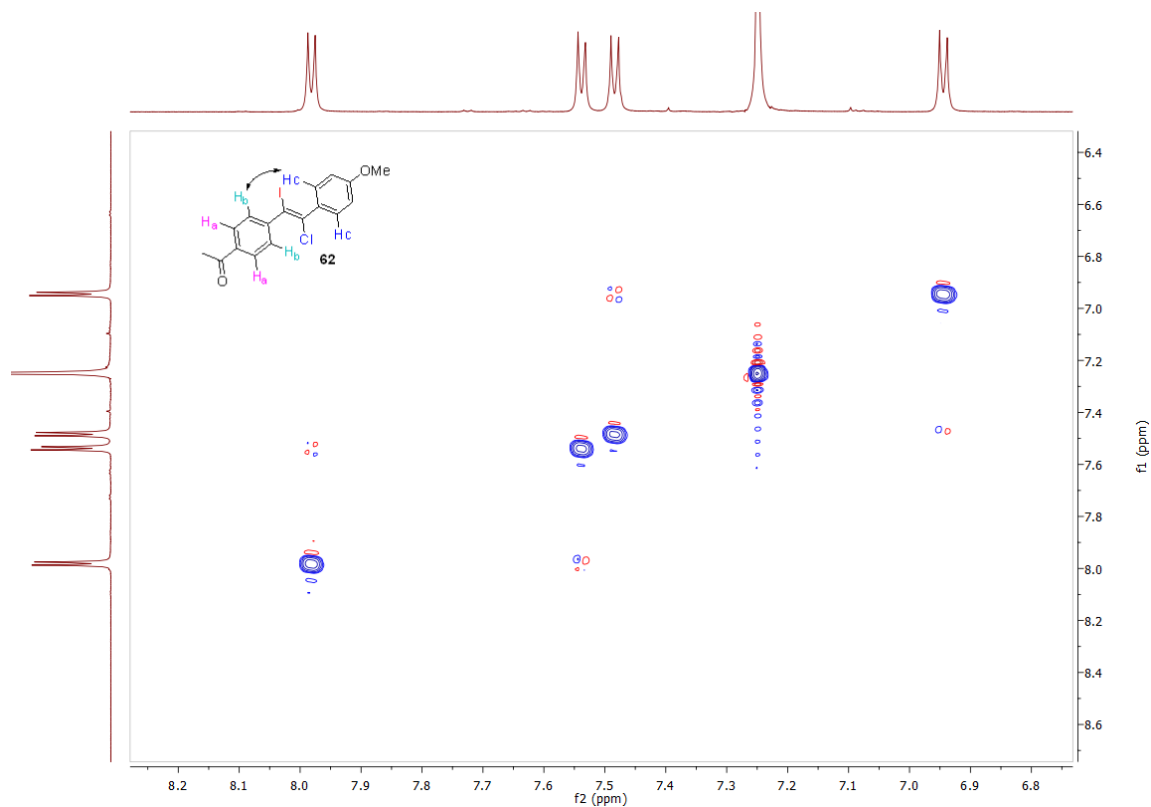

**Figure S7.** NOESY of **62**

The NMR peaks for  $H_a$  and  $H_b$  was assigned based on the H-H COSY analysis (Figure S5). In light of a previous report<sup>17</sup>, the  $C_1$  should exhibit a substantial upfield shift due to the iodine substitution (Figure S6). An interaction was observed between the  $H_b$  and  $C_1$  in the  $^1H$ - $^{13}C$  HMBC experiment (Figure S6), which indicated that the  $C_1$  was substituted with iodine. A NOESY experiment was carried out, and we have not observed interaction between the  $H_b$  and  $H_c$  (Figure S7).



## 22. Structure assignment of compound 95

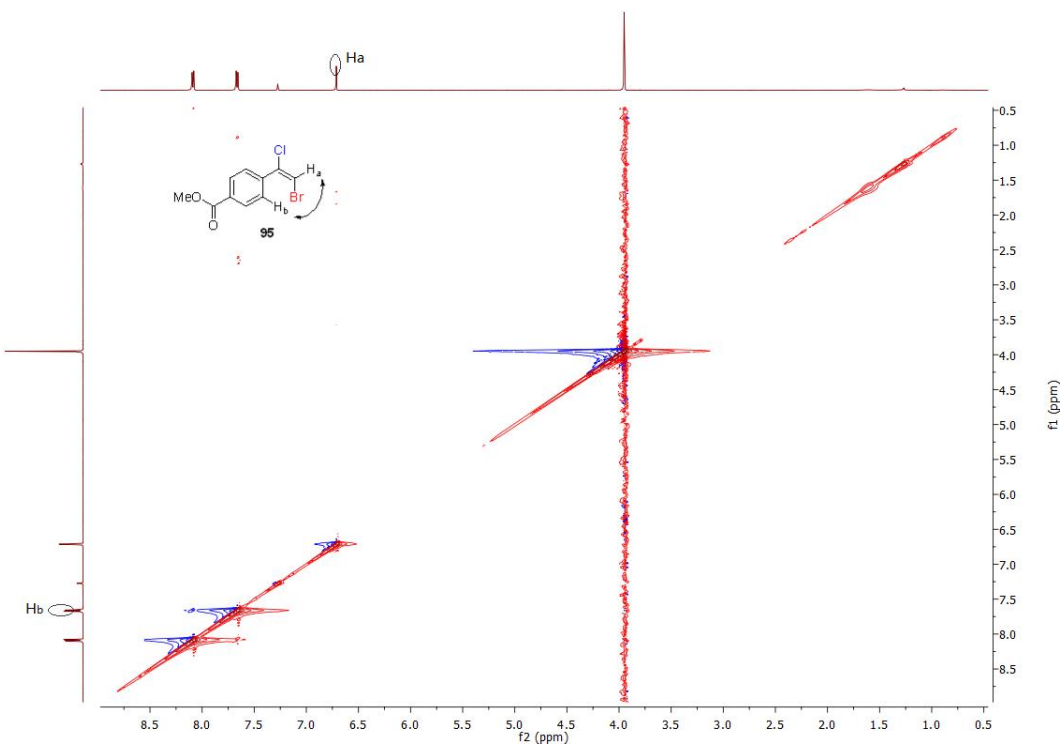

**Figure S8.** NOESY of **95**

A NOESY experiment was carried out, and we have not observed interaction between the H<sub>b</sub> and H<sub>a</sub> (Figure S8).

## 23. Comparison experiments

| Alkynes                                                                             | Reaction with ICl                                                                                                 | Standard reaction condition with NIS/LiCl                                                               |
|-------------------------------------------------------------------------------------|-------------------------------------------------------------------------------------------------------------------|---------------------------------------------------------------------------------------------------------|
| 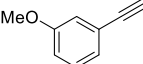   |  81%<br>E/Z > 20/1               |  80%<br>E/Z > 20/1   |
|    |  80%<br>13a/13aa/13aaa = 4/1.2/1 |  78%<br>E/Z = 15/1    |
|    |  85%<br>E/Z = 10/1               |  86%<br>E/Z > 20/1    |
|    |  75%<br>E/Z = 7.5/1              |  72%<br>E/Z > 20/1   |
|    |  83%<br>E/Z = 10/1               |  81%<br>E/Z > 20/1   |
|  |  91%<br>E/Z = 3/1               |  93%<br>E/Z > 20/1   |
|  |  86%<br>E/Z = 1/1              |  85%<br>E/Z > 20/1 |
|  |  84%<br>60a/60aa = 5/4         |  78%<br>E/Z > 20/1 |
|  |  79%<br>E/Z = 1/1.4            |  75%<br>E/Z > 20/1 |
|  |  41%<br>E/Z = 1/1.2            |  81%<br>E/Z > 20/1  |

Note: all the experiments were carried out at the same reaction condition; the only difference was the ICl source. all the products were isolated by flash silica gel column chromatography. The Regio-isomer were confirmed by NMR and GC-MS, compound **13aaa** was determined by GC-MS, the NMR data of Compound **60aa**<sup>18</sup> consistent with the previous report.

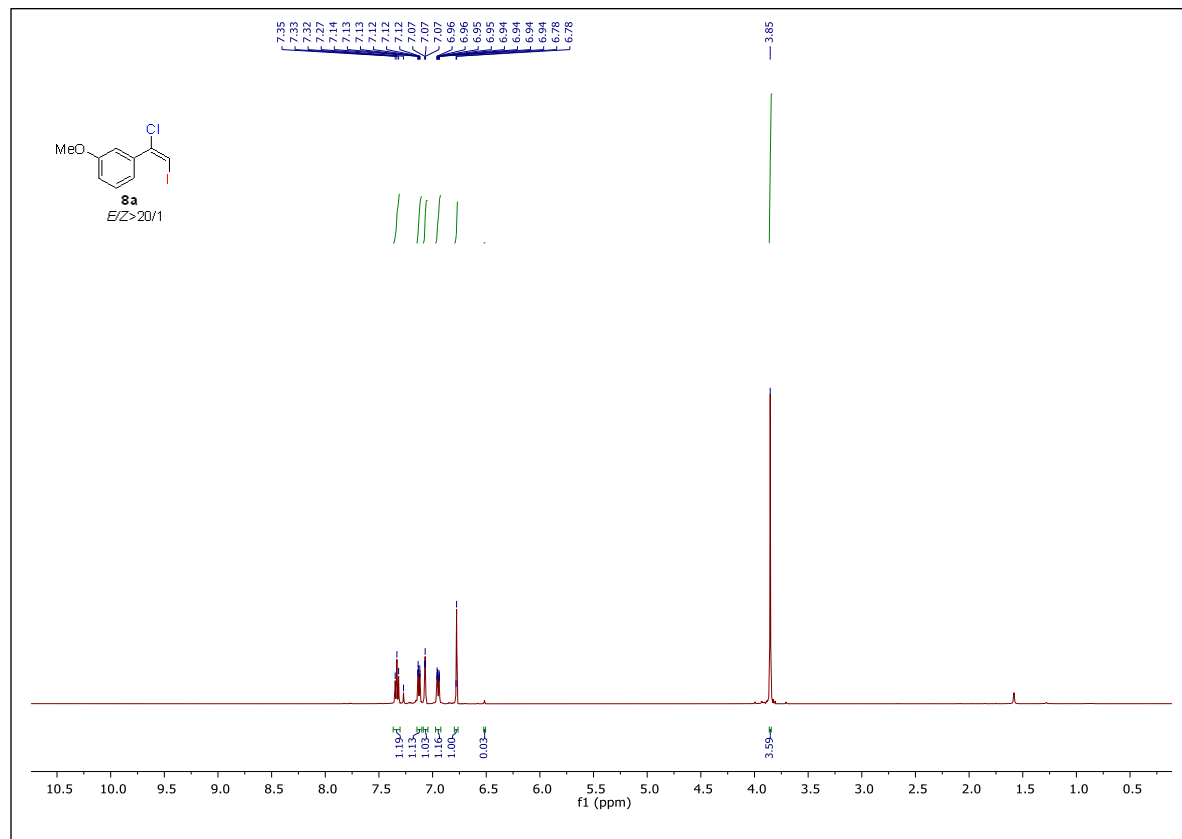

Figure S9.  $^1\text{H}$  NMR of **8a**

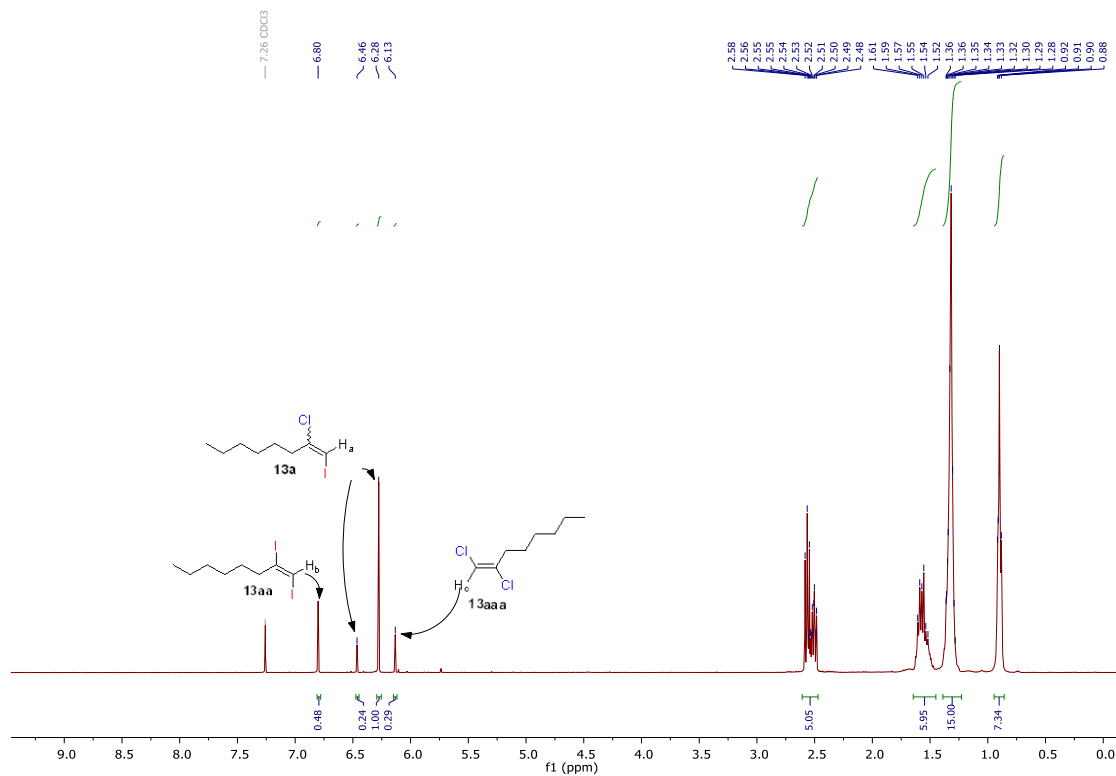

Figure S10.  $^1\text{H}$  NMR of **13a**

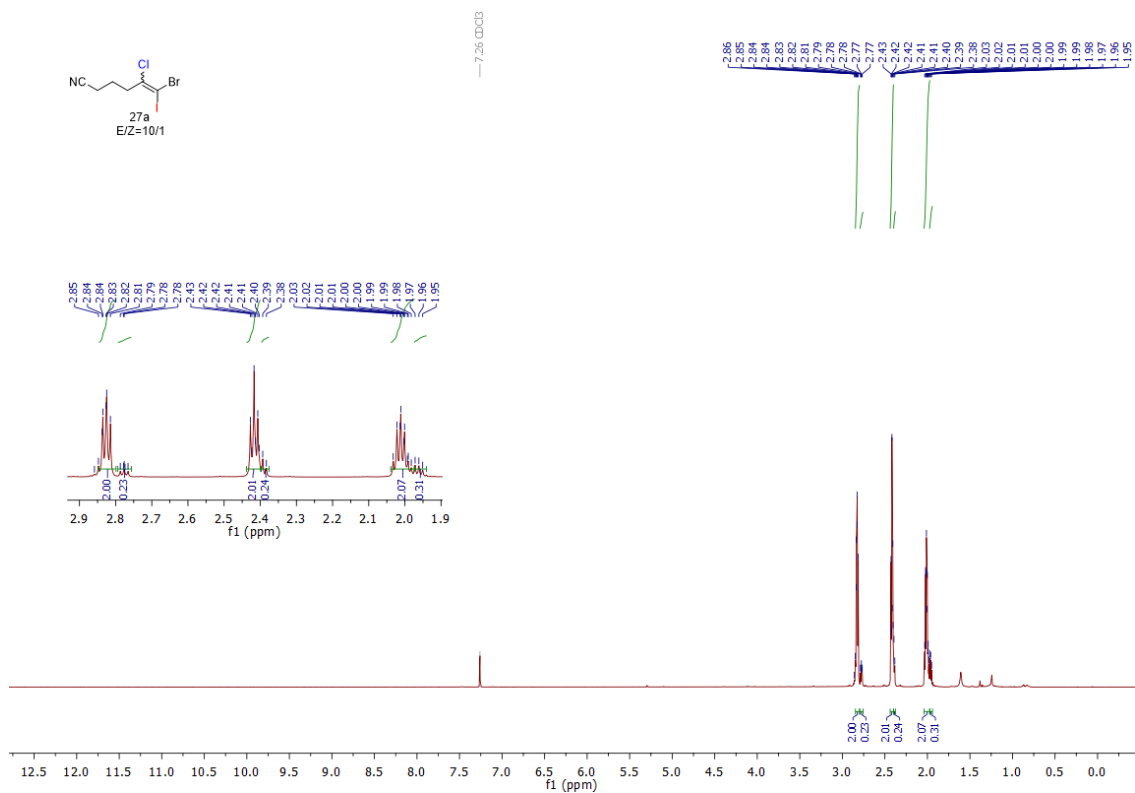

Figure S11. <sup>1</sup>H NMR of 27a

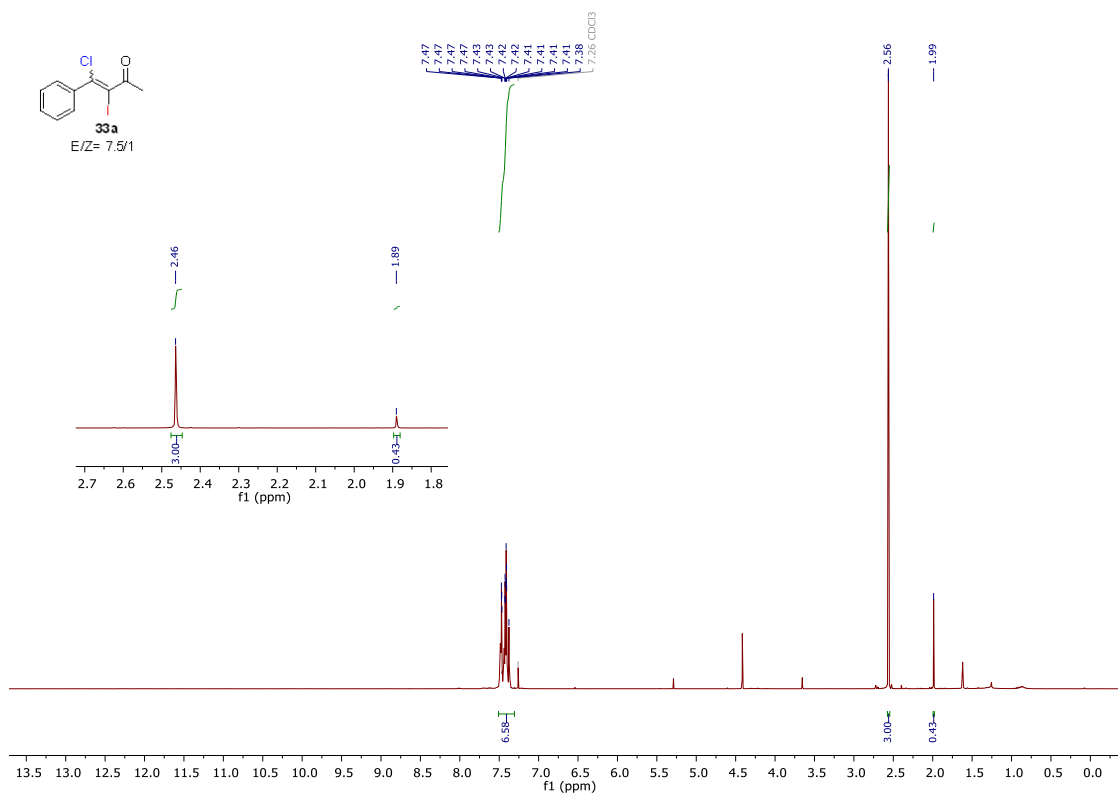

Figure S12. <sup>1</sup>H NMR of 33a

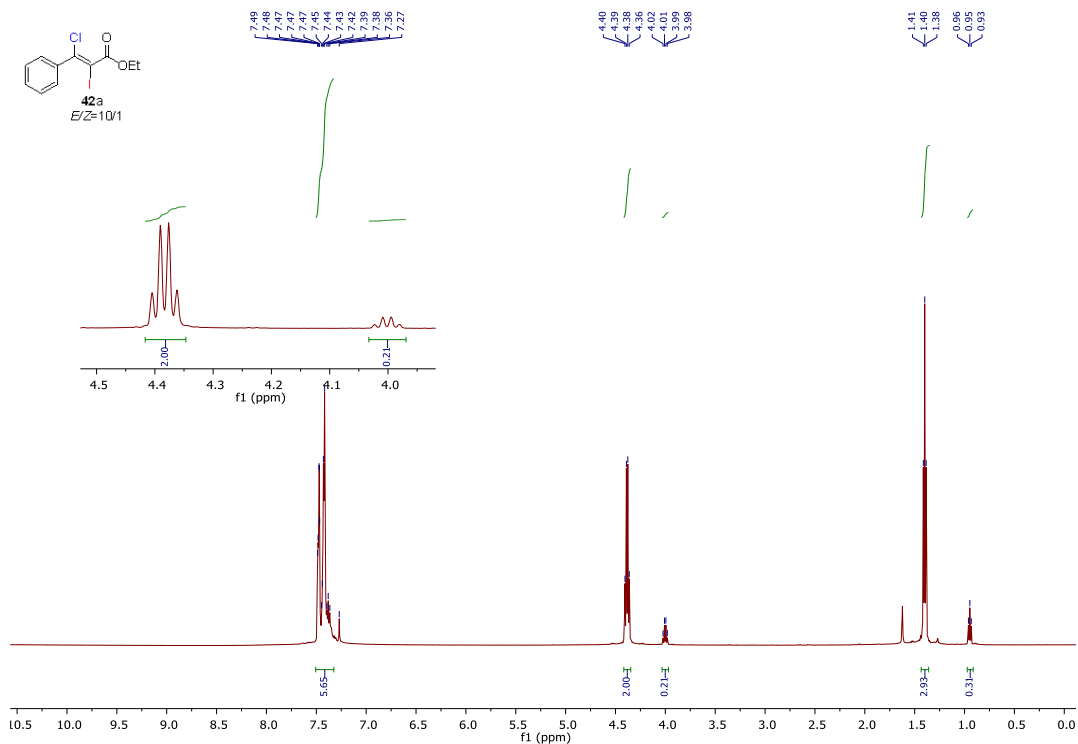

Figure S13.  $^1\text{H NMR}$  of 42a

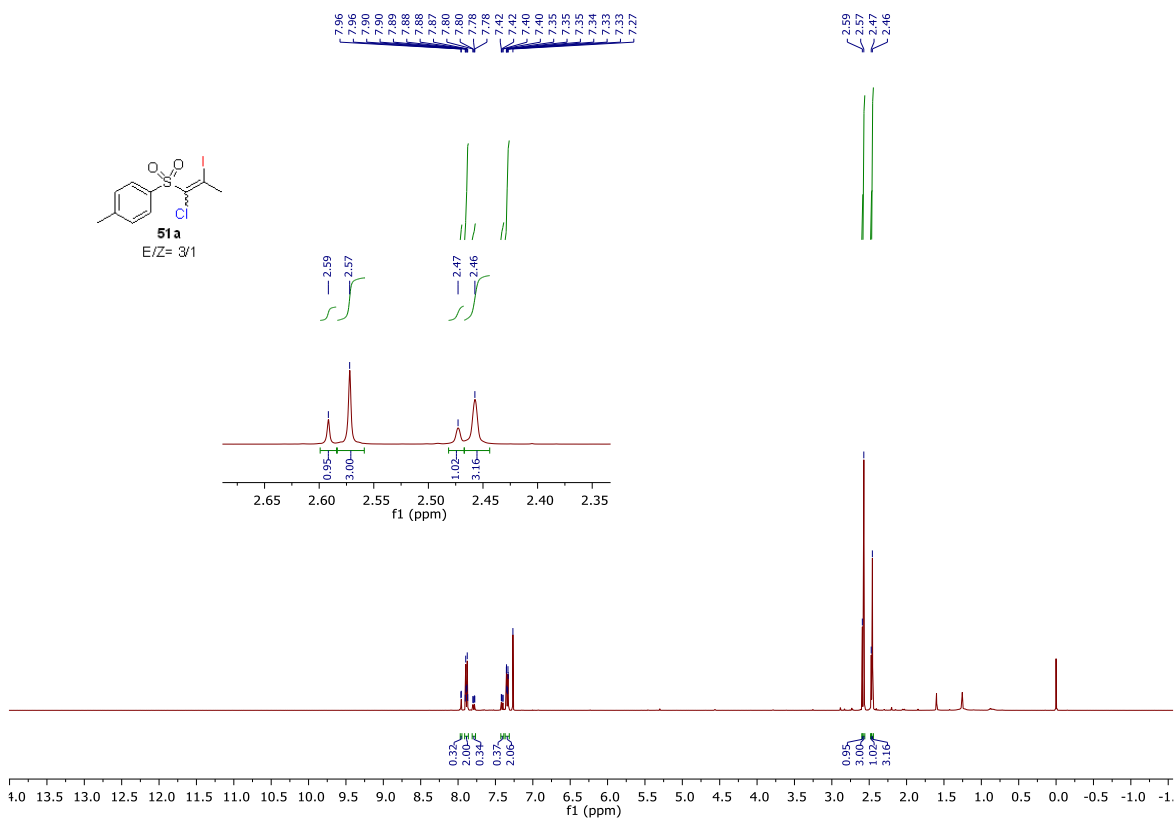

Figure S14.  $^1\text{H NMR}$  of 51a

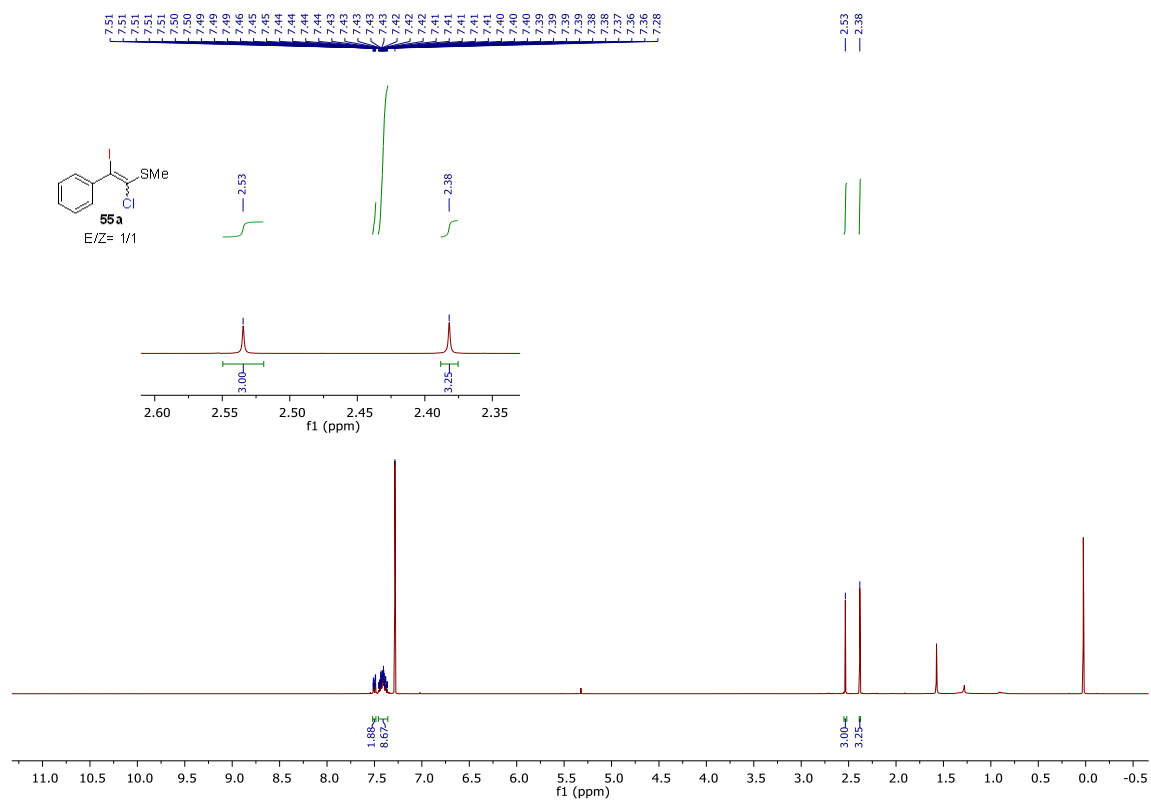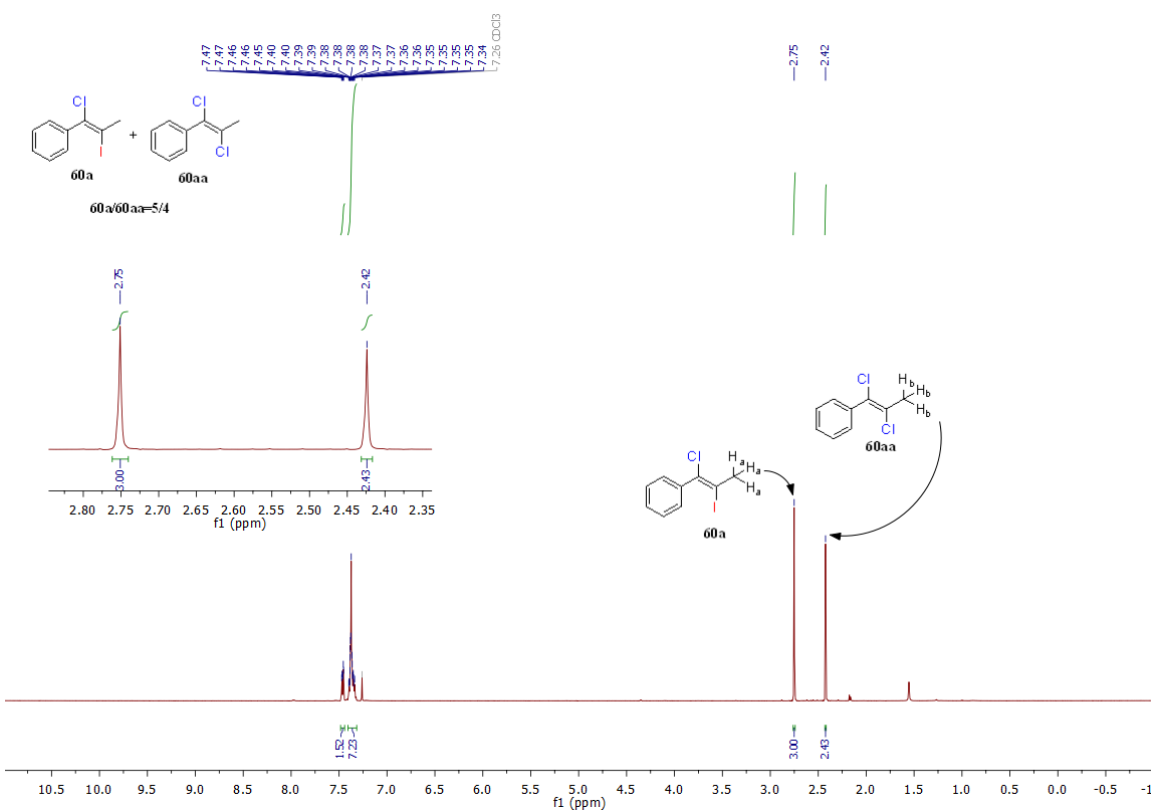

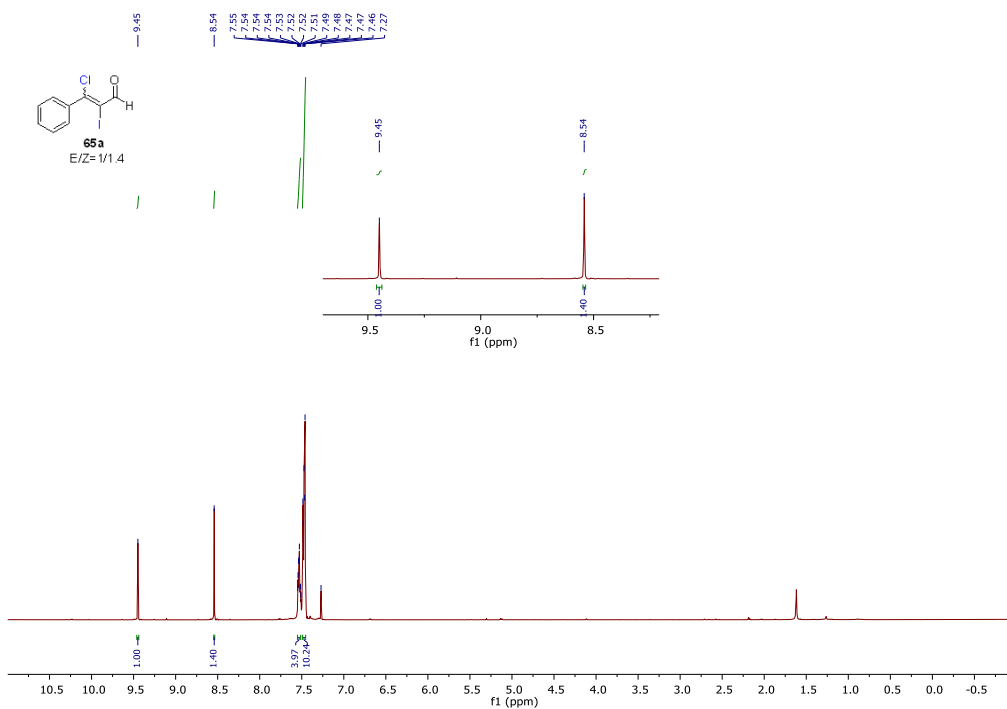

Figure S17.  $^1\text{H NMR}$  of **65a**

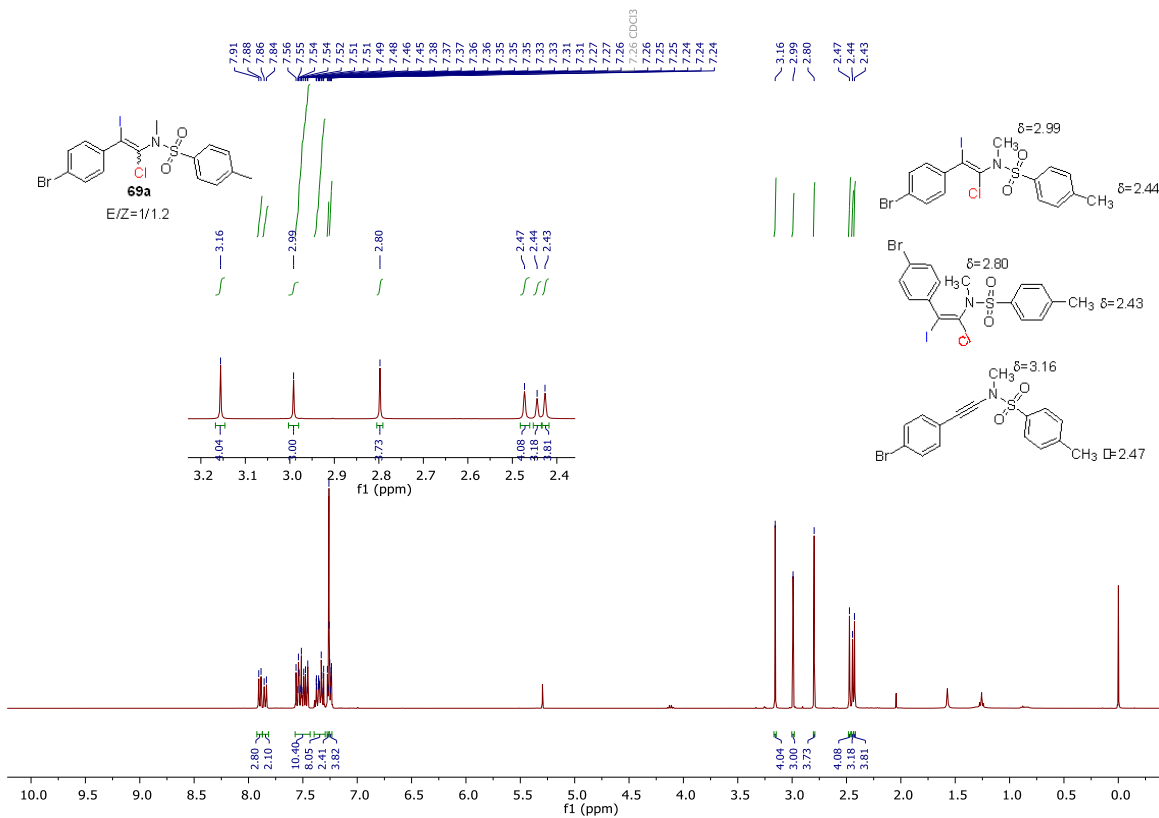

Figure S18.  $^1\text{H NMR}$  of **69a**

## 24. The crystallographic data of 10

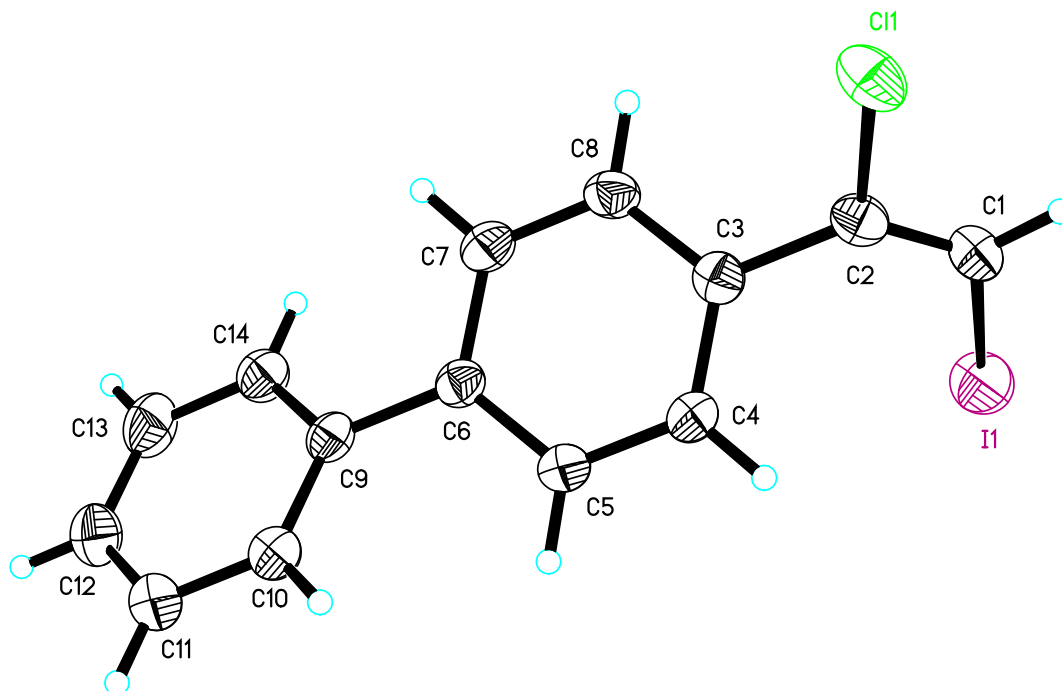

**Table S1. Crystal data and structure refinement for mo\_dd18319\_0m.**

|                      |                                      |                |
|----------------------|--------------------------------------|----------------|
| Identification code  | mo_dd18319_0m                        |                |
| Empirical formula    | C <sub>14</sub> H <sub>10</sub> Cl I |                |
| Formula weight       | 340.57                               |                |
| Temperature          | 293(2) K                             |                |
| Wavelength           | 0.71073 Å                            |                |
| Crystal system       | Monoclinic                           |                |
| Space group          | P 2 <sub>1</sub> /c                  |                |
| Unit cell dimensions | a = 9.7863(4) Å                      | = 90°.         |
|                      | b = 9.7114(3) Å                      | = 100.442(2)°. |



|                                         |                                                                    |                |
|-----------------------------------------|--------------------------------------------------------------------|----------------|
|                                         | $c = 13.7154(5) \text{ \AA}$                                       | $= 90^\circ$ . |
| Volume                                  | 1281.91(8) $\text{\AA}^3$                                          |                |
| Z                                       | 4                                                                  |                |
| Density (calculated)                    | 1.765 $\text{Mg/m}^3$                                              |                |
| Absorption coefficient                  | 2.676 $\text{mm}^{-1}$                                             |                |
| F(000)                                  | 656                                                                |                |
| Crystal size                            | 0.170 x 0.150 x 0.110 $\text{mm}^3$                                |                |
| Theta range for data collection         | 2.116 to 25.988 $^\circ$ .                                         |                |
| Index ranges                            | $-10 \leq h \leq 12$ , $-11 \leq k \leq 10$ , $-16 \leq l \leq 14$ |                |
| Reflections collected                   | 6080                                                               |                |
| Independent reflections                 | 2478 [R(int) = 0.0201]                                             |                |
| Completeness to theta = 25.242 $^\circ$ | 98.7 %                                                             |                |
| Absorption correction                   | Semi-empirical from equivalents                                    |                |
| Max. and min. transmission              | 0.7456 and 0.5529                                                  |                |
| Refinement method                       | Full-matrix least-squares on $F^2$                                 |                |
| Data / restraints / parameters          | 2478 / 0 / 146                                                     |                |
| Goodness-of-fit on $F^2$                | 1.050                                                              |                |
| Final R indices [I > 2sigma(I)]         | R1 = 0.0397, wR2 = 0.0956                                          |                |
| R indices (all data)                    | R1 = 0.0474, wR2 = 0.1017                                          |                |
| Extinction coefficient                  | 0.0055(15)                                                         |                |
| Largest diff. peak and hole             | 1.069 and -0.788 $\text{e.\AA}^{-3}$                               |                |

---

**Table S2. Atomic coordinates (  $\times 10^4$ ) and equivalent isotropic displacement parameters ( $\text{\AA}^2 \times 10^3$ ) for mo\_dd18319\_0m. U(eq) is defined as one third of the trace of the orthogonalized  $U^{ij}$  tensor.**

|       | x       | y        | z       | U(eq) |
|-------|---------|----------|---------|-------|
| I(1)  | 7537(1) | 10197(1) | 3302(1) | 78(1) |
| Cl(1) | 8203(1) | 7305(1)  | 722(1)  | 63(1) |
| C(1)  | 7781(4) | 9237(5)  | 1995(3) | 55(1) |
| C(2)  | 7857(4) | 7890(4)  | 1879(3) | 47(1) |
| C(3)  | 7684(4) | 6774(4)  | 2581(3) | 43(1) |
| C(4)  | 6471(4) | 6649(4)  | 2952(3) | 51(1) |
| C(5)  | 6295(4) | 5596(4)  | 3591(3) | 49(1) |
| C(6)  | 7339(4) | 4628(4)  | 3894(3) | 41(1) |
| C(7)  | 8554(4) | 4758(4)  | 3504(3) | 48(1) |
| C(8)  | 8719(4) | 5803(4)  | 2862(3) | 48(1) |
| C(9)  | 7159(4) | 3508(4)  | 4593(3) | 42(1) |
| C(10) | 5864(4) | 2960(4)  | 4629(3) | 52(1) |
| C(11) | 5697(5) | 1921(5)  | 5286(4) | 63(1) |
| C(12) | 6827(5) | 1410(5)  | 5927(4) | 68(1) |
| C(13) | 8114(5) | 1929(5)  | 5894(4) | 69(1) |
| C(14) | 8298(4) | 2968(4)  | 5239(3) | 53(1) |

**Table S3. Bond lengths [Å] and angles [°] for mo\_dd18319\_0m.**

---

|             |          |
|-------------|----------|
| I(1)-C(1)   | 2.072(5) |
| Cl(1)-C(2)  | 1.774(4) |
| C(1)-C(2)   | 1.322(6) |
| C(1)-H(1)   | 0.9300   |
| C(2)-C(3)   | 1.480(5) |
| C(3)-C(4)   | 1.379(5) |
| C(3)-C(8)   | 1.387(5) |
| C(4)-C(5)   | 1.378(6) |
| C(4)-H(4)   | 0.9300   |
| C(5)-C(6)   | 1.395(5) |
| C(5)-H(5)   | 0.9300   |
| C(6)-C(7)   | 1.396(6) |
| C(6)-C(9)   | 1.481(5) |
| C(7)-C(8)   | 1.372(6) |
| C(7)-H(7)   | 0.9300   |
| C(8)-H(8)   | 0.9300   |
| C(9)-C(10)  | 1.383(6) |
| C(9)-C(14)  | 1.394(5) |
| C(10)-C(11) | 1.382(6) |
| C(10)-H(10) | 0.9300   |
| C(11)-C(12) | 1.375(7) |
| C(11)-H(11) | 0.9300   |
| C(12)-C(13) | 1.365(7) |

|                 |          |
|-----------------|----------|
| C(12)-H(12)     | 0.9300   |
| C(13)-C(14)     | 1.384(6) |
| C(13)-H(13)     | 0.9300   |
| C(14)-H(14)     | 0.9300   |
| C(2)-C(1)-I(1)  | 124.6(3) |
| C(2)-C(1)-H(1)  | 117.7    |
| I(1)-C(1)-H(1)  | 117.7    |
| C(1)-C(2)-C(3)  | 129.1(4) |
| C(1)-C(2)-Cl(1) | 116.7(3) |
| C(3)-C(2)-Cl(1) | 114.2(3) |
| C(4)-C(3)-C(8)  | 118.2(4) |
| C(4)-C(3)-C(2)  | 120.8(3) |
| C(8)-C(3)-C(2)  | 121.0(3) |
| C(5)-C(4)-C(3)  | 121.0(4) |
| C(5)-C(4)-H(4)  | 119.5    |
| C(3)-C(4)-H(4)  | 119.5    |
| C(4)-C(5)-C(6)  | 121.4(4) |
| C(4)-C(5)-H(5)  | 119.3    |
| C(6)-C(5)-H(5)  | 119.3    |
| C(7)-C(6)-C(5)  | 117.0(4) |
| C(7)-C(6)-C(9)  | 121.6(3) |
| C(5)-C(6)-C(9)  | 121.4(3) |
| C(8)-C(7)-C(6)  | 121.4(4) |
| C(8)-C(7)-H(7)  | 119.3    |
| C(6)-C(7)-H(7)  | 119.3    |

|                   |          |
|-------------------|----------|
| C(7)-C(8)-C(3)    | 121.1(4) |
| C(7)-C(8)-H(8)    | 119.5    |
| C(3)-C(8)-H(8)    | 119.5    |
| C(10)-C(9)-C(14)  | 117.7(4) |
| C(10)-C(9)-C(6)   | 121.5(3) |
| C(14)-C(9)-C(6)   | 120.8(3) |
| C(11)-C(10)-C(9)  | 121.4(4) |
| C(11)-C(10)-H(10) | 119.3    |
| C(9)-C(10)-H(10)  | 119.3    |
| C(12)-C(11)-C(10) | 120.3(4) |
| C(12)-C(11)-H(11) | 119.9    |
| C(10)-C(11)-H(11) | 119.9    |
| C(13)-C(12)-C(11) | 119.0(4) |
| C(13)-C(12)-H(12) | 120.5    |
| C(11)-C(12)-H(12) | 120.5    |
| C(12)-C(13)-C(14) | 121.4(4) |
| C(12)-C(13)-H(13) | 119.3    |
| C(14)-C(13)-H(13) | 119.3    |
| C(13)-C(14)-C(9)  | 120.2(4) |
| C(13)-C(14)-H(14) | 119.9    |
| C(9)-C(14)-H(14)  | 119.9    |

---

Symmetry transformations used to generate equivalent atoms:

**Table S4. Anisotropic displacement parameters ( $\text{\AA}^2 \times 10^3$ ) for mo\_dd18319\_0m. The anisotropic displacement factor exponent takes the form:  $-2^2 [ h^2 a^* U^{11} + \dots + 2 h k a^* b^* U^{12} ]$**

|       | U <sup>11</sup> | U <sup>22</sup> | U <sup>33</sup> | U <sup>23</sup> | U <sup>13</sup> | U <sup>12</sup> |
|-------|-----------------|-----------------|-----------------|-----------------|-----------------|-----------------|
| I(1)  | 98(1)           | 57(1)           | 88(1)           | -15(1)          | 38(1)           | -5(1)           |
| Cl(1) | 74(1)           | 71(1)           | 47(1)           | -2(1)           | 17(1)           | -18(1)          |
| C(1)  | 56(2)           | 54(2)           | 59(2)           | 8(2)            | 17(2)           | -5(2)           |
| C(2)  | 40(2)           | 53(2)           | 46(2)           | -2(2)           | 6(2)            | -8(2)           |
| C(3)  | 44(2)           | 42(2)           | 43(2)           | -4(2)           | 6(2)            | -4(2)           |
| C(4)  | 42(2)           | 47(2)           | 63(2)           | 8(2)            | 12(2)           | 9(2)            |
| C(5)  | 43(2)           | 50(2)           | 57(2)           | 6(2)            | 16(2)           | 6(2)            |
| C(6)  | 42(2)           | 40(2)           | 42(2)           | -5(2)           | 8(2)            | 1(2)            |
| C(7)  | 38(2)           | 52(2)           | 53(2)           | -1(2)           | 3(2)            | 7(2)            |
| C(8)  | 36(2)           | 54(2)           | 55(2)           | -1(2)           | 11(2)           | -2(2)           |
| C(9)  | 48(2)           | 38(2)           | 41(2)           | -6(2)           | 8(2)            | 5(2)            |
| C(10) | 49(2)           | 50(2)           | 59(2)           | 5(2)            | 10(2)           | 5(2)            |
| C(11) | 62(3)           | 53(3)           | 77(3)           | 10(2)           | 20(2)           | 2(2)            |
| C(12) | 78(3)           | 57(3)           | 72(3)           | 20(2)           | 17(3)           | 8(2)            |
| C(13) | 77(3)           | 62(3)           | 64(3)           | 16(2)           | 2(2)            | 17(3)           |
| C(14) | 52(2)           | 54(2)           | 52(2)           | 2(2)            | 6(2)            | 5(2)            |

**Table S5. Hydrogen coordinates ( $\times 10^4$ ) and isotropic displacement parameters ( $\text{\AA}^2 \times 10^3$ ) for mo\_dd18319\_0m.**

|       | x    | y    | z    | U(eq) |
|-------|------|------|------|-------|
| H(1)  | 7840 | 9793 | 1453 | 66    |
| H(4)  | 5761 | 7286 | 2768 | 61    |
| H(5)  | 5463 | 5528 | 3825 | 59    |
| H(7)  | 9267 | 4124 | 3683 | 58    |
| H(8)  | 9539 | 5861 | 2610 | 57    |
| H(10) | 5089 | 3298 | 4202 | 63    |
| H(11) | 4817 | 1566 | 5295 | 76    |
| H(12) | 6716 | 720  | 6377 | 82    |
| H(13) | 8883 | 1578 | 6320 | 83    |
| H(14) | 9184 | 3307 | 5230 | 63    |

**Table S6. Torsion angles [°] for mo\_dd18319\_0m.**

|                      |           |
|----------------------|-----------|
| I(1)-C(1)-C(2)-C(3)  | 5.3(7)    |
| I(1)-C(1)-C(2)-Cl(1) | -175.2(2) |
| C(1)-C(2)-C(3)-C(4)  | 58.2(6)   |
| Cl(1)-C(2)-C(3)-C(4) | -121.4(4) |
| C(1)-C(2)-C(3)-C(8)  | -123.7(5) |
| Cl(1)-C(2)-C(3)-C(8) | 56.7(4)   |
| C(8)-C(3)-C(4)-C(5)  | 0.6(6)    |
| C(2)-C(3)-C(4)-C(5)  | 178.7(4)  |
| C(3)-C(4)-C(5)-C(6)  | 0.7(7)    |

|                         |           |
|-------------------------|-----------|
| C(4)-C(5)-C(6)-C(7)     | -1.4(6)   |
| C(4)-C(5)-C(6)-C(9)     | 179.0(4)  |
| C(5)-C(6)-C(7)-C(8)     | 0.9(6)    |
| C(9)-C(6)-C(7)-C(8)     | -179.6(4) |
| C(6)-C(7)-C(8)-C(3)     | 0.4(6)    |
| C(4)-C(3)-C(8)-C(7)     | -1.1(6)   |
| C(2)-C(3)-C(8)-C(7)     | -179.2(4) |
| C(7)-C(6)-C(9)-C(10)    | -149.3(4) |
| C(5)-C(6)-C(9)-C(10)    | 30.2(5)   |
| C(7)-C(6)-C(9)-C(14)    | 30.6(5)   |
| C(5)-C(6)-C(9)-C(14)    | -149.9(4) |
| C(14)-C(9)-C(10)-C(11)  | 0.5(6)    |
| C(6)-C(9)-C(10)-C(11)   | -179.6(4) |
| C(9)-C(10)-C(11)-C(12)  | 0.3(7)    |
| C(10)-C(11)-C(12)-C(13) | -1.0(8)   |
| C(11)-C(12)-C(13)-C(14) | 0.9(8)    |
| C(12)-C(13)-C(14)-C(9)  | -0.1(7)   |
| C(10)-C(9)-C(14)-C(13)  | -0.6(6)   |
| C(6)-C(9)-C(14)-C(13)   | 179.5(4)  |

---

Symmetry transformations used to generate equivalent atoms:



## 25. The crystallographic data of 29

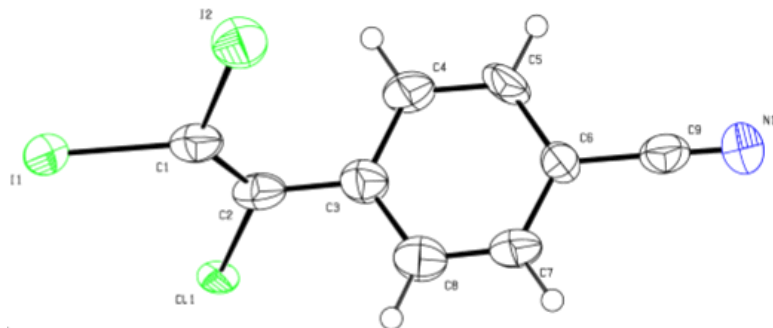

**Table S7. Crystal data and structure refinement for 20190815ZH\_ZNZ1296\_0m\_a.**

|                                   |                                                  |                |
|-----------------------------------|--------------------------------------------------|----------------|
| Identification code               | 20190815ZH_ZNZ1296_0m_a                          |                |
| Empirical formula                 | C <sub>9</sub> H <sub>4</sub> ClI <sub>2</sub> N |                |
| Formula weight                    | 415.38                                           |                |
| Temperature                       | 213(2) K                                         |                |
| Wavelength                        | 1.34139 Å                                        |                |
| Crystal system                    | Monoclinic                                       |                |
| Space group                       | P2 <sub>1</sub> /c                               |                |
| Unit cell dimensions              | a = 8.9634(5) Å                                  | = 90°.         |
|                                   | b = 8.7445(5) Å                                  | = 102.017(2)°. |
|                                   | c = 14.8139(8) Å                                 | = 90°.         |
| Volume                            | 1135.67(11) Å <sup>3</sup>                       |                |
| Z                                 | 4                                                |                |
| Density (calculated)              | 2.429 Mg/m <sup>3</sup>                          |                |
| Absorption coefficient            | 31.101 mm <sup>-1</sup>                          |                |
| F(000)                            | 752                                              |                |
| Crystal size                      | 0.160 x 0.110 x 0.080 mm <sup>3</sup>            |                |
| Theta range for data collection   | 5.140 to 52.989°.                                |                |
| Index ranges                      | -10 ≤ h ≤ 10, -10 ≤ k ≤ 9, -17 ≤ l ≤ 17          |                |
| Reflections collected             | 8960                                             |                |
| Independent reflections           | 2009 [R(int) = 0.0629]                           |                |
| Completeness to theta = 52.989°   | 99.7 %                                           |                |
| Refinement method                 | Full-matrix least-squares on F <sup>2</sup>      |                |
| Data / restraints / parameters    | 2009 / 0 / 118                                   |                |
| Goodness-of-fit on F <sup>2</sup> | 1.113                                            |                |
| Final R indices [I > 2σ(I)]       | R1 = 0.0758, wR2 = 0.2343                        |                |
| R indices (all data)              | R1 = 0.0787, wR2 = 0.2384                        |                |
| Extinction coefficient            | n/a                                              |                |
| Largest diff. peak and hole       | 4.078 and -2.259 e.Å <sup>-3</sup>               |                |

**Table S8. Atomic coordinates (  $\times 10^4$ ) and equivalent isotropic displacement parameters ( $\text{\AA}^2 \times 10^3$ ) for 20190815ZH\_ZNZ1296\_0m\_a. U(eq) is defined as one third of the trace of the orthogonalized  $U^{ij}$  tensor.**

|       | x        | y        | z        | U(eq) |
|-------|----------|----------|----------|-------|
| I(1)  | 10113(1) | 7798(1)  | 610(1)   | 43(1) |
| I(2)  | 9376(1)  | 9150(1)  | 2713(1)  | 58(1) |
| Cl(1) | 6847(3)  | 5692(3)  | 465(2)   | 30(1) |
| N(1)  | 2804(15) | 6525(19) | 4570(9)  | 60(3) |
| C(1)  | 8657(17) | 7731(16) | 1561(10) | 46(3) |
| C(5)  | 6076(17) | 6209(17) | 3682(9)  | 45(3) |
| C(6)  | 4570(14) | 6681(15) | 3422(8)  | 36(3) |
| C(9)  | 3569(16) | 6600(17) | 4084(10) | 46(3) |
| C(2)  | 7418(15) | 6918(15) | 1477(10) | 41(3) |
| C(3)  | 6424(16) | 6802(17) | 2152(10) | 46(3) |
| C(4)  | 7013(16) | 6310(17) | 3069(10) | 46(3) |
| C(7)  | 4022(17) | 7236(19) | 2537(11) | 51(4) |
| C(8)  | 4909(18) | 7266(19) | 1908(11) | 58(4) |

**Table S9. Bond lengths [ $\text{\AA}$ ] and angles [ $^\circ$ ] for 20190815ZH\_ZNZ1296\_0m\_a.**

|                |           |                 |           |
|----------------|-----------|-----------------|-----------|
| I(1)-C(1)      | 2.110(16) | C(4)-C(5)-C(6)  | 119.6(11) |
| I(2)-C(1)      | 2.099(15) | C(4)-C(5)-H(5)  | 120.2     |
| Cl(1)-C(2)     | 1.828(14) | C(6)-C(5)-H(5)  | 120.2     |
| N(1)-C(9)      | 1.096(19) | C(5)-C(6)-C(7)  | 119.9(12) |
| C(1)-C(2)      | 1.30(2)   | C(5)-C(6)-C(9)  | 119.7(11) |
| C(5)-C(4)      | 1.36(2)   | C(7)-C(6)-C(9)  | 120.3(12) |
| C(5)-C(6)      | 1.387(19) | N(1)-C(9)-C(6)  | 178.9(17) |
| C(5)-H(5)      | 0.9400    | C(1)-C(2)-C(3)  | 126.6(14) |
| C(6)-C(7)      | 1.388(19) | C(1)-C(2)-Cl(1) | 119.0(12) |
| C(6)-C(9)      | 1.462(19) | C(3)-C(2)-Cl(1) | 114.2(10) |
| C(2)-C(3)      | 1.47(2)   | C(8)-C(3)-C(4)  | 119.1(13) |
| C(3)-C(8)      | 1.39(2)   | C(8)-C(3)-C(2)  | 119.9(13) |
| C(3)-C(4)      | 1.42(2)   | C(4)-C(3)-C(2)  | 120.9(12) |
| C(4)-H(4)      | 0.9400    | C(5)-C(4)-C(3)  | 120.0(12) |
| C(7)-C(8)      | 1.34(2)   | C(5)-C(4)-H(4)  | 120.0     |
| C(7)-H(7)      | 0.9400    | C(3)-C(4)-H(4)  | 120.0     |
| C(8)-H(8)      | 0.9400    | C(8)-C(7)-C(6)  | 121.2(13) |
| C(2)-C(1)-I(2) | 120.7(12) | C(8)-C(7)-H(7)  | 119.4     |
| C(2)-C(1)-I(1) | 125.8(12) | C(6)-C(7)-H(7)  | 119.4     |
| I(2)-C(1)-I(1) | 113.5(7)  | C(7)-C(8)-C(3)  | 120.0(14) |
| C(3)-C(8)-H(8) | 120.0     | C(7)-C(8)-H(8)  | 120.0     |

Symmetry transformations used to generate equivalent atoms:

**Table S10. Anisotropic displacement parameters ( $\text{\AA}^2 \times 10^3$ ) for 20190815ZH\_ZNZ1296\_0m\_a. The anisotropic displacement factor exponent takes the form:  $-2 \sum [h^2 a^{*2} U^{11} + \dots + 2 h k a^* b^* U^{12}]$**

|       | U11    | U22    | U33   | U23    | U13   | U12    |
|-------|--------|--------|-------|--------|-------|--------|
| I(1)  | 34(1)  | 51(1)  | 41(1) | 4(1)   | 4(1)  | 0(1)   |
| I(2)  | 58(1)  | 61(1)  | 52(1) | -14(1) | 5(1)  | -21(1) |
| Cl(1) | 30(1)  | 33(1)  | 22(1) | -6(1)  | -4(1) | -19(1) |
| N(1)  | 50(7)  | 90(11) | 43(7) | 2(7)   | 18(6) | 1(7)   |
| C(1)  | 41(7)  | 46(8)  | 44(7) | 8(6)   | -5(6) | 1(6)   |
| C(5)  | 58(8)  | 51(8)  | 25(6) | 18(5)  | 5(6)  | 8(6)   |
| C(6)  | 38(6)  | 41(6)  | 28(6) | 1(5)   | 8(5)  | -4(5)  |
| C(9)  | 37(7)  | 51(8)  | 44(7) | 9(6)   | -2(6) | 3(6)   |
| C(2)  | 38(7)  | 36(6)  | 42(7) | 3(5)   | -8(5) | -7(5)  |
| C(3)  | 45(7)  | 50(7)  | 41(7) | 8(6)   | 6(6)  | 9(6)   |
| C(4)  | 39(7)  | 48(8)  | 49(8) | 11(6)  | 1(6)  | 20(6)  |
| C(7)  | 39(7)  | 65(10) | 44(8) | 10(7)  | -3(6) | 13(6)  |
| C(8)  | 51(10) | 69(10) | 50(9) | 21(8)  | 4(7)  | 16(8)  |

**Table S11. Hydrogen coordinates ( $\times 10^4$ ) and isotropic displacement parameters ( $\text{\AA}^2 \times 10^3$ ) for 20190815ZH\_ZNZ1296\_0m\_a.**

|      | x    | y    | z    | U(eq) |
|------|------|------|------|-------|
| H(5) | 6448 | 5821 | 4278 | 54    |
| H(4) | 8050 | 6055 | 3254 | 56    |
| H(7) | 3014 | 7596 | 2374 | 61    |
| H(8) | 4505 | 7602 | 1304 | 69    |

## 26. The crystallographic data of 51

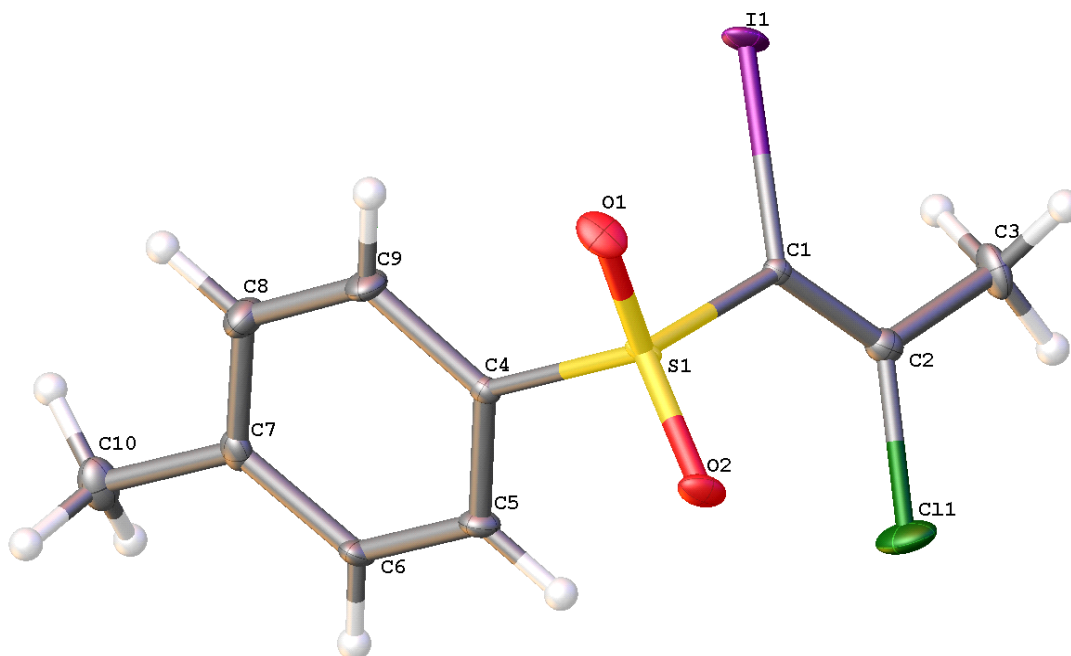

**Table S12. Crystal data and structure refinement for 1903044365\_0m.**

|                                    |                                                     |
|------------------------------------|-----------------------------------------------------|
| Identification code                | 1903044365_0m                                       |
| Empirical formula                  | C <sub>10</sub> H <sub>10</sub> ClIO <sub>2</sub> S |
| Formula weight                     | 356.59                                              |
| Temperature/K                      | 170.01                                              |
| Crystal system                     | monoclinic                                          |
| Space group                        | P2 <sub>1</sub> /n                                  |
| a/Å                                | 11.4648(5)                                          |
| b/Å                                | 7.3253(3)                                           |
| c/Å                                | 15.0403(7)                                          |
| α/°                                | 90                                                  |
| β/°                                | 106.584(2)                                          |
| γ/°                                | 90                                                  |
| Volume/Å <sup>3</sup>              | 1210.59(9)                                          |
| Z                                  | 4                                                   |
| ρ <sub>calc</sub> /cm <sup>3</sup> | 1.957                                               |
| μ/mm <sup>-1</sup>                 | 16.539                                              |
| F(000)                             | 688.0                                               |
| Crystal size/mm <sup>3</sup>       | 0.15 × 0.12 × 0.08                                  |
| Radiation                          | GaKα (λ = 1.34139)                                  |
| 2θ range for data collection/°     | 9.944 to 109.862                                    |
| Index ranges                       | -12 ≤ h ≤ 13, -8 ≤ k ≤ 8, -18 ≤ l ≤ 18              |
| Reflections collected              | 9888                                                |

|                                                |                                                                  |
|------------------------------------------------|------------------------------------------------------------------|
| Independent reflections                        | 2287 [ $R_{\text{int}} = 0.0444$ , $R_{\text{sigma}} = 0.0363$ ] |
| Data/restraints/parameters                     | 2287/120/139                                                     |
| Goodness-of-fit on $F^2$                       | 1.094                                                            |
| Final R indexes [ $I \geq 2\sigma(I)$ ]        | $R_1 = 0.0602$ , $wR_2 = 0.1618$                                 |
| Final R indexes [all data]                     | $R_1 = 0.0608$ , $wR_2 = 0.1628$                                 |
| Largest diff. peak/hole / $e \text{ \AA}^{-3}$ | 3.12/-3.80                                                       |

**Table S13. Fractional Atomic Coordinates ( $\times 10^4$ ) and Equivalent Isotropic Displacement Parameters ( $\text{\AA}^2 \times 10^3$ ) for 1903044365\_0m.  $U_{\text{eq}}$  is defined as 1/3 of the trace of the orthogonalised  $U_{\text{ij}}$  tensor.**

| Atom | $x$        | $y$        | $z$        | $U(\text{eq})$ |
|------|------------|------------|------------|----------------|
| I1   | 4216.9(3)  | 7041.9(4)  | 2987.5(2)  | 13.7(3)        |
| Cl1  | 3625.7(15) | 1421(2)    | 4233.3(10) | 22.8(4)        |
| S1   | 4702.5(13) | 2839.2(15) | 2520.3(9)  | 6.9(4)         |
| O1   | 4548(4)    | 3804(6)    | 1661(2)    | 15.7(9)        |
| O2   | 4210(4)    | 1016(5)    | 2475(3)    | 14.1(8)        |
| C1   | 4095(4)    | 4253(7)    | 3257(3)    | 6.8(9)         |
| C2   | 3653(5)    | 3686(8)    | 3940(4)    | 11.5(10)       |
| C3   | 3149(5)    | 4952(9)    | 4535(4)    | 17.8(12)       |
| C4   | 6260(5)    | 2767(7)    | 3115(4)    | 7.8(9)         |
| C5   | 6695(5)    | 1517(8)    | 3834(4)    | 12.4(9)        |
| C6   | 7907(5)    | 1483(8)    | 4309(4)    | 11.7(9)        |
| C7   | 8725(5)    | 2690(8)    | 4088(4)    | 12.3(10)       |
| C8   | 8276(5)    | 3936(8)    | 3373(4)    | 17.0(10)       |
| C9   | 7055(5)    | 4004(8)    | 2881(4)    | 15.2(10)       |
| C10  | 10063(6)   | 2620(10)   | 4579(4)    | 18.3(12)       |

**Table S14. Anisotropic Displacement Parameters ( $\text{\AA}^2 \times 10^3$ ) for 1903044365\_0m. The Anisotropic displacement factor exponent takes the form:  $-2\pi^2[h^2a^{*2}U_{11}+2hka^*b^*U_{12}+\dots]$ .**

| Atom | $U_{11}$ | $U_{22}$ | $U_{33}$ | $U_{23}$ | $U_{13}$  | $U_{12}$ |
|------|----------|----------|----------|----------|-----------|----------|
| I1   | 13.6(3)  | 3.7(3)   | 20.7(3)  | -1.19(9) | -0.22(16) | 0.11(9)  |
| Cl1  | 34.7(9)  | 13.7(8)  | 22.2(7)  | 8.6(5)   | 11.7(6)   | -1.0(6)  |
| S1   | 8.5(6)   | 4.6(6)   | 5.6(5)   | -1.1(3)  | -1.4(4)   | 1.9(4)   |
| O1   | 17(2)    | 20(2)    | 6.4(17)  | -0.5(14) | -2.9(15)  | 5.2(16)  |
| O2   | 13.9(15) | 7.3(14)  | 17.5(14) | -2.3(11) | -1.1(12)  | -0.6(12) |
| C1   | 6.5(12)  | 6.5(12)  | 6.9(11)  | -0.5(9)  | 0.9(9)    | 0.1(9)   |
| C2   | 11.2(13) | 10.3(13) | 12.0(12) | -0.4(9)  | 1.7(9)    | 0.4(9)   |
| C3   | 14(3)    | 26(3)    | 16(2)    | -5(2)    | 7(2)      | 6(2)     |
| C4   | 8.4(12)  | 7.1(12)  | 7.7(12)  | -0.2(8)  | 2.2(9)    | 1.3(9)   |
| C5   | 13(2)    | 9(2)     | 14(2)    | 4.0(18)  | 2.4(18)   | 2.1(19)  |

|     |       |       |       |          |         |          |
|-----|-------|-------|-------|----------|---------|----------|
| C6  | 10(2) | 8(2)  | 16(2) | 3.5(18)  | 2.1(18) | 2.3(18)  |
| C7  | 10(2) | 12(2) | 16(2) | -3.9(19) | 5.1(19) | 0.8(19)  |
| C8  | 14(2) | 17(2) | 20(2) | 5.9(19)  | 4.7(19) | -2.2(19) |
| C9  | 15(2) | 13(2) | 18(2) | 8.3(18)  | 4.9(18) | 0.3(19)  |
| C10 | 12(3) | 22(3) | 19(3) | -6(3)    | 2(2)    | -1(3)    |

**Table S15. Bond Lengths for 1903044365\_0m.**

| Atom | Atom | Length/Å | Atom | Atom | Length/Å |
|------|------|----------|------|------|----------|
| I1   | C1   | 2.095(5) | C4   | C5   | 1.396(7) |
| Cl1  | C2   | 1.719(6) | C4   | C9   | 1.400(7) |
| S1   | O1   | 1.439(4) | C5   | C6   | 1.370(8) |
| S1   | O2   | 1.444(4) | C6   | C7   | 1.396(8) |
| S1   | C1   | 1.796(5) | C7   | C8   | 1.392(8) |
| S1   | C4   | 1.754(6) | C7   | C10  | 1.502(9) |
| C1   | C2   | 1.335(7) | C8   | C9   | 1.385(8) |
| C2   | C3   | 1.515(7) |      |      |          |

**Table S16. Bond Angles for 1903044365\_0m.**

| Atom | Atom | Atom | Angle/°  | Atom | Atom | Atom | Angle/°  |
|------|------|------|----------|------|------|------|----------|
| O1   | S1   | O2   | 117.8(2) | C3   | C2   | Cl1  | 113.6(4) |
| O1   | S1   | C1   | 107.5(2) | C5   | C4   | S1   | 120.1(4) |
| O1   | S1   | C4   | 108.6(2) | C5   | C4   | C9   | 120.3(5) |
| O2   | S1   | C1   | 110.3(2) | C9   | C4   | S1   | 119.6(4) |
| O2   | S1   | C4   | 108.9(2) | C6   | C5   | C4   | 120.1(5) |
| C4   | S1   | C1   | 102.8(2) | C5   | C6   | C7   | 121.0(5) |
| S1   | C1   | I1   | 112.6(2) | C6   | C7   | C10  | 121.5(5) |
| C2   | C1   | I1   | 120.9(4) | C8   | C7   | C6   | 118.3(5) |
| C2   | C1   | S1   | 126.4(4) | C8   | C7   | C10  | 120.2(5) |
| C1   | C2   | Cl1  | 122.5(4) | C9   | C8   | C7   | 122.1(5) |
| C1   | C2   | C3   | 123.9(5) | C8   | C9   | C4   | 118.3(5) |

**Table S17. Hydrogen Atom Coordinates ( $\text{\AA}\times 10^4$ ) and Isotropic Displacement Parameters ( $\text{\AA}^2\times 10^3$ ) for 1903044365\_0m.**

| Atom | <i>x</i> | <i>y</i> | <i>z</i> | U(eq) |
|------|----------|----------|----------|-------|
| H3A  | 2396.49  | 5516.43  | 4154.59  | 27    |
| H3B  | 3747.32  | 5905.61  | 4798.24  | 27    |
| H3C  | 2975.39  | 4253.95  | 5038.97  | 27    |
| H5   | 6149.66  | 688.41   | 3993.86  | 15    |
| H6   | 8196.08  | 626.36   | 4796.85  | 14    |
| H8   | 8824.19  | 4766.29  | 3218.79  | 20    |
| H9   | 6765.25  | 4867.3   | 2396.53  | 18    |
| H10A | 10184.34 | 2295.51  | 5231.01  | 27    |
| H10B | 10426.83 | 3817.91  | 4541.48  | 27    |
| H10C | 10451.16 | 1701.29  | 4283.87  | 27    |

## 27. The crystallographic data of 69

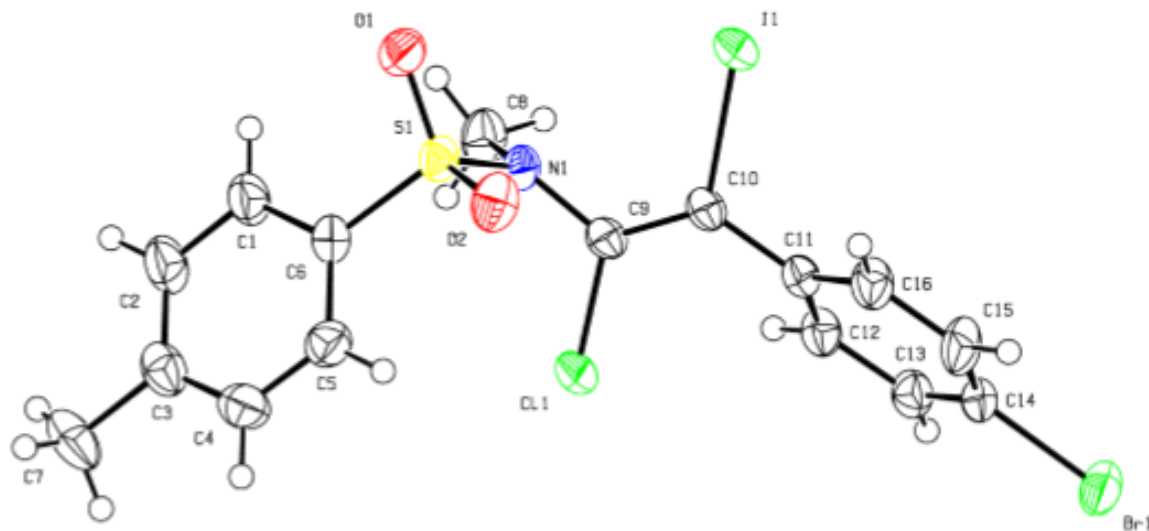

**Table S18. Crystal data and structure refinement for 20190730ZH\_ZNZ3043\_0m\_a.**

|                                 |                                                            |                    |
|---------------------------------|------------------------------------------------------------|--------------------|
| Identification code             | 20190730ZH_ZNZ3043_0m_a                                    |                    |
| Empirical formula               | C <sub>16</sub> H <sub>14</sub> Br Cl I N O <sub>2</sub> S |                    |
| Formula weight                  | 526.60                                                     |                    |
| Temperature                     | 210(2) K                                                   |                    |
| Wavelength                      | 1.34139 Å                                                  |                    |
| Crystal system                  | Monoclinic                                                 |                    |
| Space group                     | C2/c                                                       |                    |
| Unit cell dimensions            | a = 33.9978(13) Å                                          | a = 90°.           |
|                                 | b = 9.0203(4) Å                                            | b = 103.9310(10)°. |
|                                 | c = 12.2264(5) Å                                           | g = 90°.           |
| Volume                          | 3639.2(3) Å <sup>3</sup>                                   |                    |
| Z                               | 8                                                          |                    |
| Density (calculated)            | 1.922 Mg/m <sup>3</sup>                                    |                    |
| Absorption coefficient          | 12.854 mm <sup>-1</sup>                                    |                    |
| F(000)                          | 2032                                                       |                    |
| Crystal size                    | 0.160 x 0.140 x 0.110 mm <sup>3</sup>                      |                    |
| Theta range for data collection | 4.663 to 52.998°.                                          |                    |
| Index ranges                    | -40 ≤ h ≤ 40, -10 ≤ k ≤ 10, -14 ≤ l ≤ 14                   |                    |
| Reflections collected           | 17095                                                      |                    |
| Independent reflections         | 3162 [R(int) = 0.0572]                                     |                    |
| Completeness to theta = 52.998° | 98.3 %                                                     |                    |



|                                   |                                             |
|-----------------------------------|---------------------------------------------|
| Absorption correction             | Semi-empirical from equivalents             |
| Max. and min. transmission        | 0.3667 and 0.1101                           |
| Refinement method                 | Full-matrix least-squares on F <sup>2</sup> |
| Data / restraints / parameters    | 3162 / 0 / 210                              |
| Goodness-of-fit on F <sup>2</sup> | 1.086                                       |
| Final R indices [I>2sigma(I)]     | R1 = 0.0379, wR2 = 0.1027                   |
| R indices (all data)              | R1 = 0.0385, wR2 = 0.1034                   |
| Extinction coefficient            | n/a                                         |
| Largest diff. peak and hole       | 1.450 and -0.729 e.Å <sup>-3</sup>          |

**Table S19. Atomic coordinates ( x 10<sup>4</sup>) and equivalent isotropic displacement parameters (Å<sup>2</sup>x 10<sup>3</sup>)for 20190730ZH\_ZNZ3043\_0m\_a. U(eq) is defined as one third of the trace of the orthogonalized U<sup>ij</sup> tensor.**

|       | x       | y        | z       | U(eq) |
|-------|---------|----------|---------|-------|
| Br(1) | 4627(1) | -2042(1) | 8703(1) | 47(1) |
| C(1)  | 2767(1) | 6803(5)  | 3085(3) | 42(1) |
| Cl(1) | 3333(1) | 2771(1)  | 5358(1) | 43(1) |
| I(1)  | 4580(1) | 5077(1)  | 5866(1) | 40(1) |
| N(1)  | 3660(1) | 5115(3)  | 4536(3) | 30(1) |
| O(1)  | 3567(1) | 7828(3)  | 4366(2) | 44(1) |
| S(1)  | 3421(1) | 6578(1)  | 4870(1) | 31(1) |
| C(2)  | 2365(1) | 6554(5)  | 2543(3) | 48(1) |
| O(2)  | 3473(1) | 6485(3)  | 6062(2) | 42(1) |
| C(3)  | 2103(1) | 5866(4)  | 3092(4) | 42(1) |
| C(4)  | 2245(1) | 5467(5)  | 4205(4) | 44(1) |
| C(5)  | 2645(1) | 5682(4)  | 4768(3) | 38(1) |
| C(6)  | 2908(1) | 6347(4)  | 4197(3) | 33(1) |
| C(7)  | 1667(1) | 5589(6)  | 2483(4) | 53(1) |
| C(8)  | 3631(2) | 4813(5)  | 3342(3) | 42(1) |
| C(9)  | 3743(1) | 3914(4)  | 5281(3) | 28(1) |
| C(10) | 4110(1) | 3575(4)  | 5889(3) | 29(1) |
| C(11) | 4235(1) | 2222(4)  | 6564(3) | 29(1) |
| C(12) | 4173(1) | 831(4)   | 6062(3) | 34(1) |
| C(13) | 4298(1) | -447(5)  | 6697(3) | 35(1) |

|       |         |         |         |       |
|-------|---------|---------|---------|-------|
| C(14) | 4473(1) | -299(4) | 7824(3) | 34(1) |
| C(15) | 4537(1) | 1062(5) | 8344(3) | 44(1) |
| C(16) | 4420(1) | 2326(4) | 7712(3) | 38(1) |

**Table S20. Bond lengths [Å] and angles [°] for 20190730ZH\_ZNZ3043\_0m\_a.**

|             |          |                |            |
|-------------|----------|----------------|------------|
| Br(1)-C(14) | 1.905(4) | C(14)-C(15)    | 1.375(6)   |
| C(1)-C(2)   | 1.384(6) | C(15)-C(16)    | 1.382(6)   |
| C(1)-C(6)   | 1.391(5) | C(15)-H(15)    | 0.9400     |
| C(1)-H(1)   | 0.9400   | C(16)-H(16)    | 0.9400     |
| Cl(1)-C(9)  | 1.756(3) | C(2)-C(1)-C(6) | 119.3(4)   |
| I(1)-C(10)  | 2.101(3) | C(2)-C(1)-H(1) | 120.3      |
| N(1)-C(9)   | 1.400(5) | C(6)-C(1)-H(1) | 120.3      |
| N(1)-C(8)   | 1.465(5) | C(9)-N(1)-C(8) | 117.3(3)   |
| N(1)-S(1)   | 1.651(3) | C(9)-N(1)-S(1) | 119.5(2)   |
| O(1)-S(1)   | 1.429(3) | C(8)-N(1)-S(1) | 118.5(3)   |
| S(1)-O(2)   | 1.428(3) | O(2)-S(1)-O(1) | 121.07(18) |
| S(1)-C(6)   | 1.752(4) | O(2)-S(1)-N(1) | 105.00(16) |
| C(2)-C(3)   | 1.385(6) | O(1)-S(1)-N(1) | 106.40(17) |
| C(2)-H(2)   | 0.9400   | O(2)-S(1)-C(6) | 109.67(17) |
| C(3)-C(4)   | 1.378(6) | O(1)-S(1)-C(6) | 107.43(17) |
| C(3)-C(7)   | 1.509(5) | N(1)-S(1)-C(6) | 106.34(17) |
| C(4)-C(5)   | 1.380(6) | C(1)-C(2)-C(3) | 121.1(4)   |
| C(4)-H(4)   | 0.9400   | C(1)-C(2)-H(2) | 119.4      |
| C(5)-C(6)   | 1.397(5) | C(3)-C(2)-H(2) | 119.4      |
| C(5)-H(5)   | 0.9400   | C(4)-C(3)-C(2) | 118.7(4)   |
| C(7)-H(7A)  | 0.9700   | C(4)-C(3)-C(7) | 121.0(4)   |
| C(7)-H(7B)  | 0.9700   | C(2)-C(3)-C(7) | 120.3(4)   |
| C(7)-H(7C)  | 0.9700   | C(3)-C(4)-C(5) | 121.8(4)   |
| C(8)-H(8A)  | 0.9700   | C(3)-C(4)-H(4) | 119.1      |
| C(8)-H(8B)  | 0.9700   | C(5)-C(4)-H(4) | 119.1      |
| C(8)-H(8C)  | 0.9700   | C(4)-C(5)-C(6) | 118.9(4)   |
| C(9)-C(10)  | 1.326(5) | C(4)-C(5)-H(5) | 120.6      |
| C(10)-C(11) | 1.477(5) | C(6)-C(5)-H(5) | 120.6      |
| C(11)-C(12) | 1.390(5) | C(1)-C(6)-C(5) | 120.2(3)   |

|                   |          |                   |          |
|-------------------|----------|-------------------|----------|
| C(11)-C(16)       | 1.396(5) | C(1)-C(6)-S(1)    | 119.7(3) |
| C(12)-C(13)       | 1.398(6) | C(5)-C(6)-S(1)    | 120.1(3) |
| C(12)-H(12)       | 0.9400   | C(3)-C(7)-H(7A)   | 109.5    |
| C(13)-C(14)       | 1.370(6) | C(3)-C(7)-H(7B)   | 109.5    |
| C(13)-H(13)       | 0.9400   | H(7A)-C(7)-H(7B)  | 109.5    |
| C(3)-C(7)-H(7C)   | 109.5    | C(16)-C(11)-C(10) | 120.3(3) |
| H(7A)-C(7)-H(7C)  | 109.5    | C(11)-C(12)-C(13) | 120.3(3) |
| H(7B)-C(7)-H(7C)  | 109.5    | C(11)-C(12)-H(12) | 119.8    |
| N(1)-C(8)-H(8A)   | 109.5    | C(13)-C(12)-H(12) | 119.8    |
| N(1)-C(8)-H(8B)   | 109.5    | C(14)-C(13)-C(12) | 118.6(4) |
| H(8A)-C(8)-H(8B)  | 109.5    | C(14)-C(13)-H(13) | 120.7    |
| N(1)-C(8)-H(8C)   | 109.5    | C(12)-C(13)-H(13) | 120.7    |
| H(8A)-C(8)-H(8C)  | 109.5    | C(13)-C(14)-C(15) | 122.2(4) |
| H(8B)-C(8)-H(8C)  | 109.5    | C(13)-C(14)-Br(1) | 118.8(3) |
| C(10)-C(9)-N(1)   | 124.0(3) | C(15)-C(14)-Br(1) | 119.0(3) |
| C(10)-C(9)-Cl(1)  | 119.2(3) | C(14)-C(15)-C(16) | 119.1(3) |
| N(1)-C(9)-Cl(1)   | 116.7(2) | C(14)-C(15)-H(15) | 120.5    |
| C(9)-C(10)-C(11)  | 127.4(3) | C(16)-C(15)-H(15) | 120.5    |
| C(9)-C(10)-I(1)   | 117.4(3) | C(15)-C(16)-C(11) | 120.4(4) |
| C(11)-C(10)-I(1)  | 115.1(2) | C(15)-C(16)-H(16) | 119.8    |
| C(12)-C(11)-C(16) | 119.3(3) | C(11)-C(16)-H(16) | 119.8    |
| C(12)-C(11)-C(10) | 120.4(3) |                   |          |

---

Symmetry transformations used to generate equivalent atoms:

**Table S21.** Anisotropic displacement parameters ( $\text{\AA}^2 \times 10^3$ ) for 20190730ZH\_ZNZ3043\_0m\_a. The anisotropic displacement factor exponent takes the form:  $-2p^2[ h^2 a^2 U^{11} + \dots + 2 h k a^* b^* U^{12} ]$

|       | U11   | U22   | U33   | U23    | U13   | U12   |
|-------|-------|-------|-------|--------|-------|-------|
| Br(1) | 46(1) | 43(1) | 51(1) | 16(1)  | 10(1) | 14(1) |
| C(1)  | 32(2) | 58(3) | 35(2) | 9(2)   | 3(2)  | 5(2)  |
| Cl(1) | 24(1) | 40(1) | 58(1) | 10(1)  | -3(1) | -7(1) |
| I(1)  | 25(1) | 41(1) | 50(1) | 5(1)   | 1(1)  | -7(1) |
| N(1)  | 28(2) | 34(2) | 22(1) | 3(1)   | -2(1) | 1(1)  |
| O(1)  | 42(2) | 37(2) | 48(2) | 10(1)  | -1(1) | -5(1) |
| S(1)  | 33(1) | 31(1) | 26(1) | 1(1)   | -2(1) | 0(1)  |
| C(2)  | 33(2) | 66(3) | 38(2) | 4(2)   | -1(2) | 6(2)  |
| O(2)  | 52(2) | 42(2) | 27(1) | -5(1)  | 0(1)  | 6(1)  |
| C(3)  | 32(2) | 36(2) | 54(2) | -9(2)  | 4(2)  | 4(2)  |
| C(4)  | 36(2) | 37(2) | 60(3) | 0(2)   | 17(2) | -2(2) |
| C(5)  | 40(2) | 34(2) | 41(2) | 4(2)   | 12(2) | 3(2)  |
| C(6)  | 30(2) | 34(2) | 32(2) | 2(1)   | 4(1)  | 6(2)  |
| C(7)  | 28(2) | 53(3) | 73(3) | -21(2) | 1(2)  | -2(2) |
| C(8)  | 44(3) | 55(3) | 25(2) | 2(2)   | 6(2)  | 11(2) |
| C(9)  | 25(2) | 31(2) | 27(2) | -4(1)  | 1(1)  | -5(1) |
| C(10) | 24(2) | 32(2) | 27(2) | -4(1)  | 0(1)  | -2(1) |
| C(11) | 23(2) | 32(2) | 30(2) | 1(1)   | 1(1)  | 0(1)  |
| C(12) | 30(2) | 36(2) | 32(2) | -1(2)  | 1(1)  | 2(2)  |
| C(13) | 31(2) | 34(2) | 41(2) | 1(2)   | 7(2)  | 6(2)  |
| C(14) | 25(2) | 34(2) | 42(2) | 11(2)  | 7(2)  | 7(2)  |
| C(15) | 45(2) | 49(3) | 29(2) | 6(2)   | -9(2) | 6(2)  |
| C(16) | 36(2) | 36(2) | 36(2) | -2(2)  | -4(2) | 0(2)  |

**Table S22. Hydrogen coordinates (  $\times 10^4$ ) and isotropic displacement parameters ( $\text{\AA}^2 \times 10^3$ ) for 20190730ZH\_ZNZ3043\_0m\_a.**

|       | x    | y     | z    | U(eq) |
|-------|------|-------|------|-------|
| H(1)  | 2941 | 7275  | 2706 | 51    |
| H(2)  | 2269 | 6857  | 1791 | 57    |
| H(4)  | 2066 | 5037  | 4591 | 52    |
| H(5)  | 2738 | 5386  | 5524 | 46    |
| H(7A) | 1495 | 6329  | 2708 | 80    |
| H(7B) | 1586 | 4610  | 2673 | 80    |
| H(7C) | 1641 | 5651  | 1676 | 80    |
| H(8A) | 3860 | 4213  | 3269 | 63    |
| H(8B) | 3633 | 5741  | 2943 | 63    |
| H(8C) | 3381 | 4284  | 3024 | 63    |
| H(12) | 4046 | 750   | 5291 | 41    |
| H(13) | 4262 | -1388 | 6358 | 42    |
| H(15) | 4658 | 1130  | 9119 | 53    |
| H(16) | 4465 | 3263  | 8057 | 46    |

## 28. The crystallographic data of 82

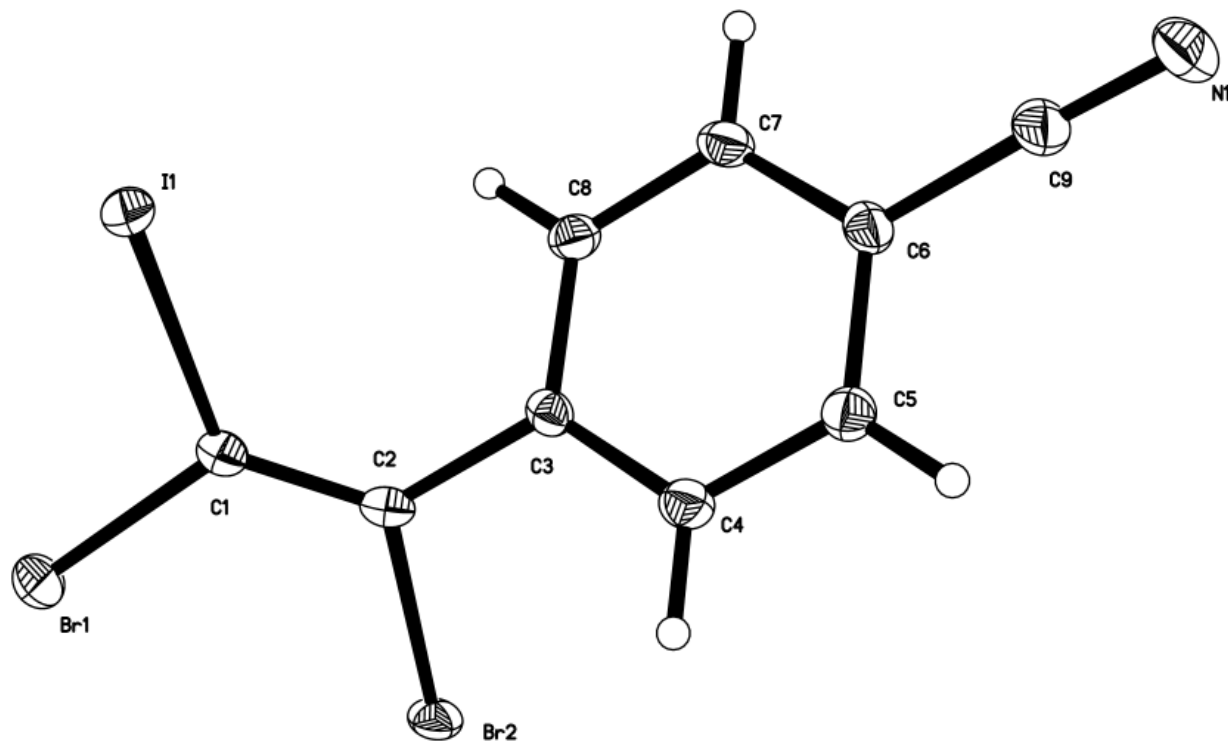

**Table S23. Crystal data and structure refinement for 20191027LI\_ZNZ4686\_0m\_a.**

|                                 |                                                   |                  |
|---------------------------------|---------------------------------------------------|------------------|
| Identification code             | 20191027LI_ZNZ4686_0m_a                           |                  |
| Empirical formula               | C <sub>9</sub> H <sub>4</sub> Br <sub>2</sub> I N |                  |
| Formula weight                  | 412.85                                            |                  |
| Temperature                     | 190(2) K                                          |                  |
| Wavelength                      | 1.34139 Å                                         |                  |
| Crystal system                  | Monoclinic                                        |                  |
| Space group                     | P2 <sub>1</sub> /c                                |                  |
| Unit cell dimensions            | a = 4.16110(10) Å                                 | = 90°.           |
|                                 | b = 18.3564(5) Å                                  | = 101.6520(10)°. |
|                                 | c = 13.9941(4) Å                                  | = 90°.           |
| Volume                          | 1046.88(5) Å <sup>3</sup>                         |                  |
| Z                               | 4                                                 |                  |
| Density (calculated)            | 2.619 Mg/m <sup>3</sup>                           |                  |
| Absorption coefficient          | 22.185 mm <sup>-1</sup>                           |                  |
| F(000)                          | 752                                               |                  |
| Crystal size                    | 0.120 x 0.110 x 0.090 mm <sup>3</sup>             |                  |
| Theta range for data collection | 3.501 to 52.982°.                                 |                  |

|                                   |                                             |
|-----------------------------------|---------------------------------------------|
| Index ranges                      | -4<=h<=4, -21<=k<=21, -16<=l<=15            |
| Reflections collected             | 7688                                        |
| Independent reflections           | 1836 [R(int) = 0.0356]                      |
| Completeness to theta = 52.982°   | 99.8 %                                      |
| Refinement method                 | Full-matrix least-squares on F <sup>2</sup> |
| Data / restraints / parameters    | 1836 / 0 / 118                              |
| Goodness-of-fit on F <sup>2</sup> | 1.095                                       |
| Final R indices [I>2sigma(I)]     | R1 = 0.0241, wR2 = 0.0628                   |
| R indices (all data)              | R1 = 0.0256, wR2 = 0.0637                   |
| Extinction coefficient            | n/a                                         |
| Largest diff. peak and hole       | 1.001 and -0.558 e.Å <sup>-3</sup>          |

**Table S24. Atomic coordinates (  $\times 10^4$ ) and equivalent isotropic displacement parameters ( $\text{\AA}^2 \times 10^3$ ) for 20191027LI\_ZNZ4686\_0m\_a. U(eq) is defined as one third of the trace of the orthogonalized U<sup>ij</sup> tensor.**

|       | x        | y       | z       | U(eq) |
|-------|----------|---------|---------|-------|
| Br(1) | 2132(1)  | 786(1)  | 4153(1) | 34(1) |
| Br(2) | 716(1)   | 2460(1) | 3322(1) | 29(1) |
| C(1)  | 3810(10) | 1604(2) | 4908(3) | 26(1) |
| C(2)  | 3245(9)  | 2282(2) | 4599(3) | 24(1) |
| C(3)  | 4412(9)  | 2962(2) | 5141(3) | 22(1) |
| C(4)  | 5860(10) | 3510(2) | 4686(3) | 28(1) |
| C(5)  | 7032(10) | 4133(2) | 5181(3) | 28(1) |
| C(6)  | 6749(9)  | 4227(2) | 6150(3) | 26(1) |
| C(7)  | 5224(11) | 3685(2) | 6614(3) | 29(1) |
| C(8)  | 4069(10) | 3063(2) | 6104(3) | 26(1) |
| C(9)  | 8065(11) | 4872(3) | 6668(3) | 33(1) |
| I(1)  | 6811(1)  | 1298(1) | 6235(1) | 27(1) |
| N(1)  | 9160(11) | 5388(2) | 7049(3) | 48(1) |

**Table S25. Bond lengths [Å] and angles [°] for 20191027LI\_ZNZ4686\_0m\_a.**

---

|                 |          |
|-----------------|----------|
| Br(1)-C(1)      | 1.887(4) |
| Br(2)-C(2)      | 1.910(4) |
| C(1)-C(2)       | 1.323(6) |
| C(1)-I(1)       | 2.095(4) |
| C(2)-C(3)       | 1.490(6) |
| C(3)-C(4)       | 1.391(6) |
| C(3)-C(8)       | 1.396(5) |
| C(4)-C(5)       | 1.375(6) |
| C(4)-H(4)       | 0.9500   |
| C(5)-C(6)       | 1.395(6) |
| C(5)-H(5)       | 0.9500   |
| C(6)-C(7)       | 1.408(6) |
| C(6)-C(9)       | 1.438(6) |
| C(7)-C(8)       | 1.379(6) |
| C(7)-H(7)       | 0.9500   |
| C(8)-H(8)       | 0.9500   |
| C(9)-N(1)       | 1.135(6) |
| C(2)-C(1)-Br(1) | 123.0(3) |
| C(2)-C(1)-I(1)  | 125.2(3) |
| Br(1)-C(1)-I(1) | 111.7(2) |
| C(1)-C(2)-C(3)  | 127.1(4) |
| C(1)-C(2)-Br(2) | 119.6(3) |
| C(3)-C(2)-Br(2) | 113.2(3) |
| C(4)-C(3)-C(8)  | 118.9(4) |
| C(4)-C(3)-C(2)  | 119.9(3) |
| C(8)-C(3)-C(2)  | 121.1(4) |
| C(5)-C(4)-C(3)  | 120.9(4) |
| C(5)-C(4)-H(4)  | 119.6    |
| C(3)-C(4)-H(4)  | 119.6    |
| C(4)-C(5)-C(6)  | 120.1(4) |
| C(4)-C(5)-H(5)  | 120.0    |
| C(6)-C(5)-H(5)  | 120.0    |
| C(5)-C(6)-C(7)  | 119.7(4) |
| C(5)-C(6)-C(9)  | 119.5(4) |



|                |          |
|----------------|----------|
| C(7)-C(6)-C(9) | 120.8(4) |
| C(8)-C(7)-C(6) | 119.2(4) |
| C(8)-C(7)-H(7) | 120.4    |
| C(6)-C(7)-H(7) | 120.4    |
| C(7)-C(8)-C(3) | 121.1(4) |
| C(7)-C(8)-H(8) | 119.4    |
| C(3)-C(8)-H(8) | 119.4    |
| N(1)-C(9)-C(6) | 177.4(5) |

---

Symmetry transformations used to generate equivalent atoms:

**Table S26.** Anisotropic displacement parameters ( $\text{\AA}^2 \times 10^3$ ) for 20191027LI\_ZNZ4686\_0m\_a. The anisotropic displacement factor exponent takes the form:  $-2 \sum [h^2 a^* U^{11} + \dots + 2 h k a^* b^* U^{12}]$

---

|       | U <sup>11</sup> | U <sup>22</sup> | U <sup>33</sup> | U <sup>23</sup> | U <sup>13</sup> | U <sup>12</sup> |
|-------|-----------------|-----------------|-----------------|-----------------|-----------------|-----------------|
| Br(1) | 44(1)           | 26(1)           | 30(1)           | -7(1)           | 0(1)            | -6(1)           |
| Br(2) | 34(1)           | 34(1)           | 17(1)           | -2(1)           | -2(1)           | 5(1)            |
| C(1)  | 30(2)           | 27(2)           | 21(2)           | -4(2)           | 3(2)            | -2(2)           |
| C(2)  | 23(2)           | 32(2)           | 17(2)           | -2(2)           | 3(2)            | 0(2)            |
| C(3)  | 22(2)           | 22(2)           | 22(2)           | -2(2)           | 2(2)            | 4(2)            |
| C(4)  | 31(2)           | 29(2)           | 24(2)           | -1(2)           | 7(2)            | 3(2)            |
| C(5)  | 28(2)           | 27(2)           | 26(2)           | 1(2)            | 2(2)            | -1(2)           |
| C(6)  | 27(2)           | 23(2)           | 26(2)           | -2(2)           | -4(2)           | 3(2)            |
| C(7)  | 34(2)           | 32(2)           | 21(2)           | -3(2)           | 5(2)            | 5(2)            |
| C(8)  | 29(2)           | 28(2)           | 21(2)           | 2(2)            | 4(2)            | 3(2)            |
| C(9)  | 34(2)           | 30(2)           | 29(2)           | -1(2)           | -7(2)           | -1(2)           |
| I(1)  | 31(1)           | 27(1)           | 22(1)           | 1(1)            | -1(1)           | 2(1)            |
| N(1)  | 62(3)           | 38(2)           | 37(2)           | -9(2)           | -10(2)          | -6(2)           |

---

**Table S27. Hydrogen coordinates (  $\times 10^4$ ) and isotropic displacement parameters ( $\text{\AA}^2 \times 10^3$ ) for 20191027LI\_ZNZ4686\_0m\_a.**

|      | x    | y    | z    | U(eq) |
|------|------|------|------|-------|
| H(4) | 6041 | 3453 | 4024 | 33    |
| H(5) | 8037 | 4501 | 4863 | 33    |
| H(7) | 4992 | 3746 | 7271 | 35    |
| H(8) | 3023 | 2698 | 6414 | 31    |

## 29. The crystallographic data of 91

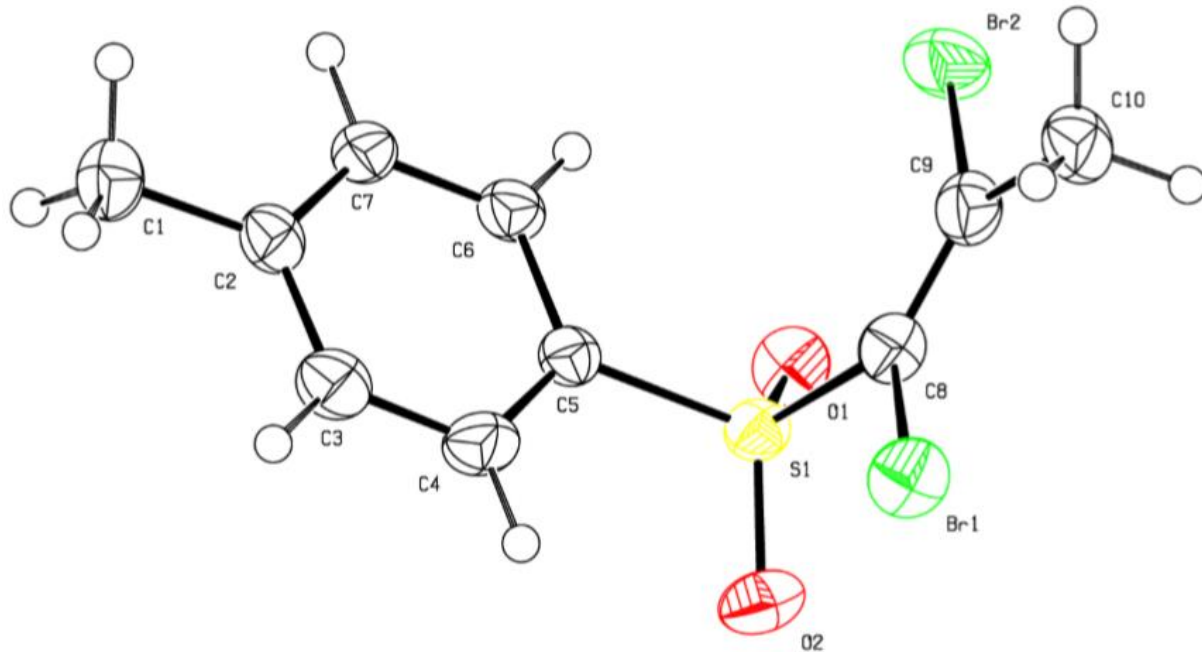

**Table S28. Crystal data and structure refinement for 20191031LI\_ZNZ2648\_0m\_a.**

|                                 |                                        |               |
|---------------------------------|----------------------------------------|---------------|
| Identification code             | 20191031LI_ZNZ2648_0m_a                |               |
| Empirical formula               | C <sub>9</sub> H <sub>8</sub> Br I O S |               |
| Formula weight                  | 371.02                                 |               |
| Temperature                     | 193(2) K                               |               |
| Wavelength                      | 0.71073 Å                              |               |
| Crystal system                  | Monoclinic                             |               |
| Space group                     | P2 <sub>1</sub> /n                     |               |
| Unit cell dimensions            | a = 5.6374(3) Å                        | = 90°.        |
|                                 | b = 10.8292(5) Å                       | = 92.333(2)°. |
|                                 | c = 18.2279(10) Å                      | = 90°.        |
| Volume                          | 1111.86(10) Å <sup>3</sup>             |               |
| Z                               | 4                                      |               |
| Density (calculated)            | 2.216 Mg/m <sup>3</sup>                |               |
| Absorption coefficient          | 6.621 mm <sup>-1</sup>                 |               |
| F(000)                          | 696                                    |               |
| Crystal size                    | 0.120 x 0.110 x 0.090 mm <sup>3</sup>  |               |
| Theta range for data collection | 2.923 to 28.329°.                      |               |
| Index ranges                    | -7<=h<=7, -14<=k<=13, -24<=l<=22       |               |
| Reflections collected           | 10610                                  |               |

|                                   |                                             |
|-----------------------------------|---------------------------------------------|
| Independent reflections           | 2748 [R(int) = 0.0233]                      |
| Completeness to theta = 25.242°   | 98.8 %                                      |
| Absorption correction             | Semi-empirical from equivalents             |
| Max. and min. transmission        | 0.3343 and 0.2350                           |
| Refinement method                 | Full-matrix least-squares on F <sup>2</sup> |
| Data / restraints / parameters    | 2748 / 0 / 119                              |
| Goodness-of-fit on F <sup>2</sup> | 1.066                                       |
| Final R indices [I>2sigma(I)]     | R1 = 0.0183, wR2 = 0.0452                   |
| R indices (all data)              | R1 = 0.0202, wR2 = 0.0459                   |
| Extinction coefficient            | n/a                                         |
| Largest diff. peak and hole       | 0.697 and -1.019 e.Å <sup>-3</sup>          |

**Table S29. Atomic coordinates (  $\times 10^4$ ) and equivalent isotropic displacement parameters ( $\text{\AA}^2 \times 10^3$ ) for 20191031LI\_ZNZ2648\_0m\_a. U(eq) is defined as one third of the trace of the orthogonalized U<sup>ij</sup> tensor.**

|       | x       | y       | z       | U(eq) |
|-------|---------|---------|---------|-------|
| I(1)  | 9844(1) | 5622(1) | 3852(1) | 29(1) |
| Br(1) | 3946(1) | 2825(1) | 2857(1) | 27(1) |
| S(1)  | 6007(1) | 5358(1) | 2374(1) | 25(1) |
| O(1)  | 3627(3) | 5347(2) | 1994(1) | 34(1) |
| C(7)  | 7362(3) | 4183(2) | 3677(1) | 22(1) |
| C(8)  | 6020(3) | 4160(2) | 3064(1) | 21(1) |
| C(6)  | 7396(3) | 3258(2) | 4274(1) | 23(1) |
| C(5)  | 5572(4) | 3234(2) | 4766(1) | 30(1) |
| C(1)  | 9284(4) | 2440(2) | 4372(1) | 28(1) |
| C(9)  | 7977(4) | 4598(2) | 1777(1) | 35(1) |
| C(4)  | 5650(4) | 2398(2) | 5340(2) | 36(1) |
| C(3)  | 7527(4) | 1585(2) | 5434(1) | 35(1) |
| C(2)  | 9336(4) | 1604(2) | 4941(2) | 33(1) |

**Table S30. Bond lengths [Å] and angles [°] for 20191031LI\_ZNZ2648\_0m\_a.**

---

|                 |            |
|-----------------|------------|
| I(1)-C(7)       | 2.1098(19) |
| Br(1)-C(8)      | 1.8885(19) |
| S(1)-O(1)       | 1.4852(16) |
| S(1)-C(9)       | 1.788(2)   |
| S(1)-C(8)       | 1.806(2)   |
| C(7)-C(8)       | 1.323(3)   |
| C(7)-C(6)       | 1.479(3)   |
| C(6)-C(1)       | 1.390(3)   |
| C(6)-C(5)       | 1.393(3)   |
| C(5)-C(4)       | 1.384(3)   |
| C(5)-H(5)       | 0.9500     |
| C(1)-C(2)       | 1.377(3)   |
| C(1)-H(1)       | 0.9500     |
| C(9)-H(9A)      | 0.9800     |
| C(9)-H(9B)      | 0.9800     |
| C(9)-H(9C)      | 0.9800     |
| C(4)-C(3)       | 1.382(3)   |
| C(4)-H(4)       | 0.9500     |
| C(3)-C(2)       | 1.386(4)   |
| C(3)-H(3)       | 0.9500     |
| C(2)-H(2)       | 0.9500     |
| O(1)-S(1)-C(9)  | 106.46(11) |
| O(1)-S(1)-C(8)  | 107.26(10) |
| C(9)-S(1)-C(8)  | 96.21(11)  |
| C(8)-C(7)-C(6)  | 126.73(18) |
| C(8)-C(7)-I(1)  | 119.65(15) |
| C(6)-C(7)-I(1)  | 113.59(14) |
| C(7)-C(8)-S(1)  | 124.04(16) |
| C(7)-C(8)-Br(1) | 120.73(16) |
| S(1)-C(8)-Br(1) | 115.23(11) |
| C(1)-C(6)-C(5)  | 119.1(2)   |
| C(1)-C(6)-C(7)  | 120.88(19) |
| C(5)-C(6)-C(7)  | 119.91(19) |
| C(4)-C(5)-C(6)  | 119.9(2)   |

|                  |          |
|------------------|----------|
| C(4)-C(5)-H(5)   | 120.1    |
| C(6)-C(5)-H(5)   | 120.1    |
| C(2)-C(1)-C(6)   | 120.6(2) |
| C(2)-C(1)-H(1)   | 119.7    |
| C(6)-C(1)-H(1)   | 119.7    |
| S(1)-C(9)-H(9A)  | 109.5    |
| S(1)-C(9)-H(9B)  | 109.5    |
| H(9A)-C(9)-H(9B) | 109.5    |
| S(1)-C(9)-H(9C)  | 109.5    |
| H(9A)-C(9)-H(9C) | 109.5    |
| H(9B)-C(9)-H(9C) | 109.5    |
| C(3)-C(4)-C(5)   | 120.7(2) |
| C(3)-C(4)-H(4)   | 119.6    |
| C(5)-C(4)-H(4)   | 119.6    |
| C(4)-C(3)-C(2)   | 119.4(2) |
| C(4)-C(3)-H(3)   | 120.3    |
| C(2)-C(3)-H(3)   | 120.3    |
| C(1)-C(2)-C(3)   | 120.3(2) |
| C(1)-C(2)-H(2)   | 119.9    |
| C(3)-C(2)-H(2)   | 119.9    |

---

Symmetry transformations used to generate equivalent atoms:

**Table S31.** Anisotropic displacement parameters ( $\text{\AA}^2 \times 10^3$ ) for 20191031LI\_ZNZ2648\_0m\_a. The anisotropic displacement factor exponent takes the form:  $-2 \sum [h^2 a^* U^{11} + \dots + 2 h k a^* b^* U^{12}]$

---

|       | U <sup>11</sup> | U <sup>22</sup> | U <sup>33</sup> | U <sup>23</sup> | U <sup>13</sup> | U <sup>12</sup> |
|-------|-----------------|-----------------|-----------------|-----------------|-----------------|-----------------|
| I(1)  | 33(1)           | 28(1)           | 27(1)           | 1(1)            | -3(1)           | -10(1)          |
| Br(1) | 26(1)           | 27(1)           | 29(1)           | -5(1)           | 0(1)            | -6(1)           |
| S(1)  | 25(1)           | 25(1)           | 23(1)           | 2(1)            | -1(1)           | 1(1)            |
| O(1)  | 24(1)           | 42(1)           | 36(1)           | 8(1)            | -4(1)           | 6(1)            |
| C(7)  | 22(1)           | 22(1)           | 21(1)           | -1(1)           | 3(1)            | -3(1)           |
| C(8)  | 22(1)           | 21(1)           | 21(1)           | -2(1)           | 3(1)            | -1(1)           |
| C(6)  | 24(1)           | 22(1)           | 22(1)           | 0(1)            | -1(1)           | -5(1)           |

|      |       |       |       |       |       |       |
|------|-------|-------|-------|-------|-------|-------|
| C(5) | 24(1) | 34(1) | 31(1) | 6(1)  | 2(1)  | 1(1)  |
| C(1) | 29(1) | 23(1) | 32(1) | -3(1) | 4(1)  | -1(1) |
| C(9) | 28(1) | 50(1) | 26(1) | 4(1)  | 7(1)  | 6(1)  |
| C(4) | 31(1) | 44(1) | 34(1) | 10(1) | 7(1)  | -4(1) |
| C(3) | 40(1) | 30(1) | 35(1) | 13(1) | -4(1) | -8(1) |
| C(2) | 34(1) | 22(1) | 42(2) | 2(1)  | -3(1) | 1(1)  |

**Table S32. Hydrogen coordinates (  $\times 10^4$ ) and isotropic displacement parameters ( $\text{\AA}^2 \times 10^3$ ) for 20191031LI\_ZNZ2648\_0m\_a.**

|       | x     | y    | z    | U(eq) |
|-------|-------|------|------|-------|
| H(5)  | 4276  | 3791 | 4708 | 36    |
| H(1)  | 10550 | 2459 | 4043 | 33    |
| H(9A) | 7367  | 3771 | 1659 | 52    |
| H(9B) | 9553  | 4529 | 2020 | 52    |
| H(9C) | 8090  | 5077 | 1323 | 52    |
| H(4)  | 4400  | 2382 | 5674 | 43    |
| H(3)  | 7578  | 1019 | 5832 | 42    |
| H(2)  | 10616 | 1037 | 4996 | 39    |

### 30. The crystallographic data of 101

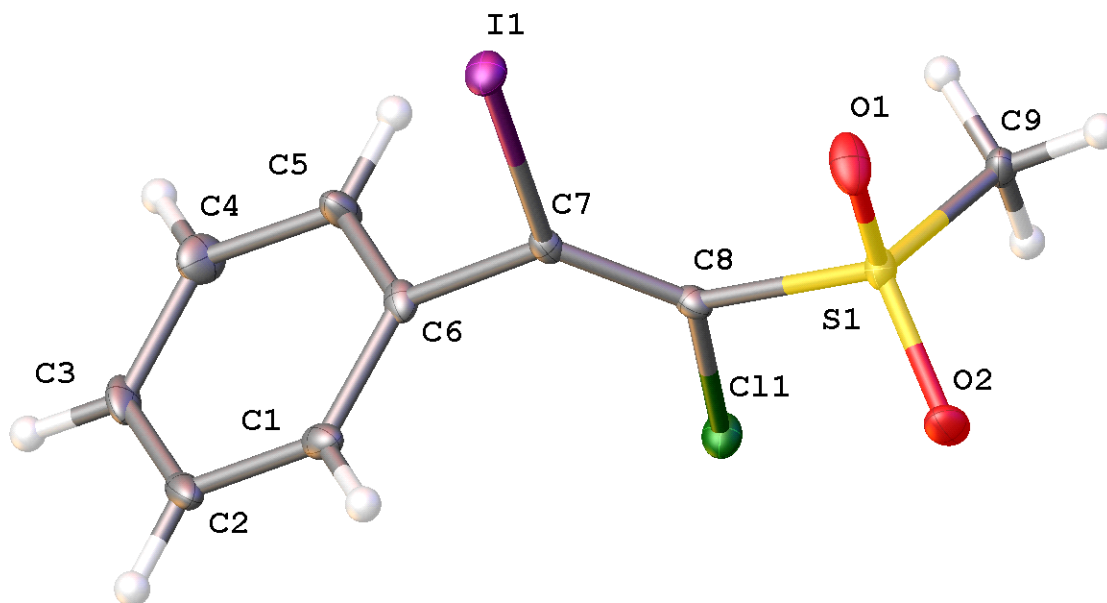

**Table S33. Crystal data and structure refinement for 1904226483\_0m.**

|                                    |                                                               |
|------------------------------------|---------------------------------------------------------------|
| Identification code                | 1904226483_0m                                                 |
| Empirical formula                  | C <sub>9</sub> H <sub>8</sub> ClIO <sub>2</sub> S             |
| Formula weight                     | 342.56                                                        |
| Temperature/K                      | 169.97                                                        |
| Crystal system                     | orthorhombic                                                  |
| Space group                        | Pbca                                                          |
| a/Å                                | 7.09320(10)                                                   |
| b/Å                                | 10.3240(2)                                                    |
| c/Å                                | 29.7405(5)                                                    |
| α/°                                | 90                                                            |
| β/°                                | 90                                                            |
| γ/°                                | 90                                                            |
| Volume/Å <sup>3</sup>              | 2177.90(6)                                                    |
| Z                                  | 8                                                             |
| ρ <sub>calc</sub> /cm <sup>3</sup> | 2.089                                                         |
| μ/mm <sup>-1</sup>                 | 18.365                                                        |
| F(000)                             | 1312.0                                                        |
| Crystal size/mm <sup>3</sup>       | 0.12 × 0.05 × 0.01                                            |
| Radiation                          | GaKα (λ = 1.34139)                                            |
| 2θ range for data collection/°     | 12.026 to 109.868                                             |
| Index ranges                       | -8 ≤ h ≤ 8, -10 ≤ k ≤ 12, -36 ≤ l ≤ 36                        |
| Reflections collected              | 20107                                                         |
| Independent reflections            | 2064 [R <sub>int</sub> = 0.0384, R <sub>sigma</sub> = 0.0195] |



|                                             |                                                   |
|---------------------------------------------|---------------------------------------------------|
| Data/restraints/parameters                  | 2064/0/128                                        |
| Goodness-of-fit on F <sup>2</sup>           | 1.115                                             |
| Final R indexes [ $I \geq 2\sigma(I)$ ]     | R <sub>1</sub> = 0.0204, wR <sub>2</sub> = 0.0502 |
| Final R indexes [all data]                  | R <sub>1</sub> = 0.0209, wR <sub>2</sub> = 0.0507 |
| Largest diff. peak/hole / e Å <sup>-3</sup> | 0.41/-0.89                                        |

**Table S32. Fractional Atomic Coordinates ( $\times 10^4$ ) and Equivalent Isotropic Displacement Parameters ( $\text{Å}^2 \times 10^3$ ) for 1904226483\_0m.  $U_{\text{eq}}$  is defined as 1/3 of the trace of the orthogonalised  $U_{\text{IJ}}$  tensor.**

| Atom | x         | y          | z         | U(eq)     |
|------|-----------|------------|-----------|-----------|
| I1   | 9881.0(2) | 7686.2(2)  | 6371.7(2) | 21.90(8)  |
| Cl1  | 4164.4(7) | 6100.5(5)  | 5798.1(2) | 20.32(13) |
| S1   | 7925.6(8) | 5664.4(5)  | 5440.2(2) | 16.63(13) |
| O1   | 9878(2)   | 5901(2)    | 5527.5(6) | 30.3(5)   |
| O2   | 7304(3)   | 4341.2(16) | 5415.3(5) | 27.1(4)   |
| C1   | 5277(3)   | 6684(2)    | 6929.8(8) | 20.3(5)   |
| C2   | 4096(4)   | 7104(3)    | 7271.6(8) | 24.7(5)   |
| C3   | 3404(3)   | 8351(3)    | 7270.1(8) | 26.1(5)   |
| C4   | 3872(4)   | 9186(2)    | 6923.8(9) | 28.1(6)   |
| C5   | 5063(3)   | 8774(3)    | 6582.0(9) | 24.6(6)   |
| C6   | 5783(3)   | 7526(2)    | 6585.6(7) | 16.6(5)   |
| C7   | 7118(3)   | 7085(2)    | 6230.1(7) | 15.3(4)   |
| C8   | 6559(3)   | 6405(2)    | 5876.7(7) | 15.9(4)   |
| C9   | 7244(4)   | 6487(2)    | 4951.9(7) | 22.2(5)   |

**Table S33. Anisotropic Displacement Parameters ( $\text{Å}^2 \times 10^3$ ) for 1904226483\_0m. The Anisotropic displacement factor exponent takes the form:  $-2\pi^2[h^2a^{*2}U_{11}+2hka^*b^*U_{12}+\dots]$ .**

| Atom | U <sub>11</sub> | U <sub>22</sub> | U <sub>33</sub> | U <sub>23</sub> | U <sub>13</sub> | U <sub>12</sub> |
|------|-----------------|-----------------|-----------------|-----------------|-----------------|-----------------|
| I1   | 15.83(11)       | 26.42(12)       | 23.45(11)       | -4.30(6)        | -1.32(5)        | -2.15(5)        |
| Cl1  | 14.2(3)         | 25.3(3)         | 21.5(3)         | -5.1(2)         | -1.1(2)         | 0.4(2)          |
| S1   | 18.0(3)         | 17.0(3)         | 14.9(2)         | -2.44(19)       | 2.00(19)        | 2.8(2)          |
| O1   | 16.7(9)         | 48.0(13)        | 26.1(9)         | -12.2(9)        | 0.8(7)          | 5.3(7)          |
| O2   | 39.9(11)        | 14.9(8)         | 26.6(8)         | -1.6(7)         | 8.9(8)          | 3.4(7)          |
| C1   | 22.6(12)        | 20.3(13)        | 18.2(11)        | -2.3(10)        | -1.8(9)         | -2.4(9)         |
| C2   | 23.0(13)        | 33.1(14)        | 18.1(11)        | 0.0(10)         | 3.2(10)         | -8.4(11)        |
| C3   | 17.1(11)        | 38.0(15)        | 23.4(11)        | -12.6(11)       | 6.5(10)         | -3.9(10)        |
| C4   | 26.1(13)        | 22.3(13)        | 36.0(13)        | -5.7(10)        | 6.5(11)         | 5.0(10)         |
| C5   | 26.7(14)        | 21.6(14)        | 25.4(13)        | 1.8(10)         | 7.6(10)         | 1.5(9)          |
| C6   | 14.8(12)        | 19.2(11)        | 15.7(10)        | -3.5(8)         | 0.6(9)          | -1.5(9)         |
| C7   | 14.1(11)        | 15.4(10)        | 16.4(10)        | 2.0(9)          | 0.9(9)          | 1.5(9)          |
| C8   | 13.7(10)        | 17.0(11)        | 17.0(10)        | 0.2(8)          | 1.3(8)          | 0.2(8)          |
| C9   | 31.1(13)        | 19.7(11)        | 15.8(10)        | -0.3(9)         | 2.0(9)          | -0.2(10)        |

**Table S34. Bond Lengths for 1904226483\_0m.**

| Atom | Atom | Length/Å   | Atom | Atom | Length/Å |
|------|------|------------|------|------|----------|
| I1   | C7   | 2.099(2)   | C1   | C6   | 1.390(3) |
| Cl1  | C8   | 1.743(2)   | C2   | C3   | 1.378(4) |
| S1   | O1   | 1.4304(18) | C3   | C4   | 1.383(4) |
| S1   | O2   | 1.4373(18) | C4   | C5   | 1.389(3) |
| S1   | C8   | 1.791(2)   | C5   | C6   | 1.386(3) |
| S1   | C9   | 1.750(2)   | C6   | C7   | 1.490(3) |
| C1   | C2   | 1.387(3)   | C7   | C8   | 1.325(3) |

**Table S35. Bond Angles for 1904226483\_0m.**

| Atom | Atom | Atom | Angle/°    | Atom | Atom | Atom | Angle/°    |
|------|------|------|------------|------|------|------|------------|
| O1   | S1   | O2   | 117.95(12) | C6   | C5   | C4   | 120.2(2)   |
| O1   | S1   | C8   | 108.65(11) | C1   | C6   | C7   | 119.7(2)   |
| O1   | S1   | C9   | 109.58(12) | C5   | C6   | C1   | 119.5(2)   |
| O2   | S1   | C8   | 106.07(10) | C5   | C6   | C7   | 120.8(2)   |
| O2   | S1   | C9   | 109.48(11) | C6   | C7   | I1   | 111.14(15) |
| C9   | S1   | C8   | 104.18(11) | C8   | C7   | I1   | 126.55(17) |
| C2   | C1   | C6   | 120.0(2)   | C8   | C7   | C6   | 122.3(2)   |
| C3   | C2   | C1   | 120.3(2)   | Cl1  | C8   | S1   | 110.69(12) |
| C2   | C3   | C4   | 120.0(2)   | C7   | C8   | Cl1  | 119.57(17) |
| C3   | C4   | C5   | 120.0(2)   | C7   | C8   | S1   | 129.72(18) |

**Table S36. Hydrogen Atom Coordinates ( $\text{\AA} \times 10^4$ ) and Isotropic Displacement Parameters ( $\text{\AA}^2 \times 10^3$ ) for 1904226483\_0m.**

| Atom | x       | y       | z       | U(eq) |
|------|---------|---------|---------|-------|
| H1   | 5741.12 | 5820.48 | 6930.93 | 24    |
| H2   | 3761.06 | 6528.89 | 7507.83 | 30    |
| H3   | 2606.9  | 8637.66 | 7506.67 | 31    |
| H4   | 3378.84 | 10041.4 | 6919.81 | 34    |
| H5   | 5385.8  | 9349    | 6344.9  | 29    |
| H9A  | 7414.33 | 7420.14 | 4995.44 | 33    |
| H9B  | 5915.25 | 6303.84 | 4887.93 | 33    |
| H9C  | 8021.67 | 6195.93 | 4698.85 | 33    |

### 31. The crystallographic data of 105

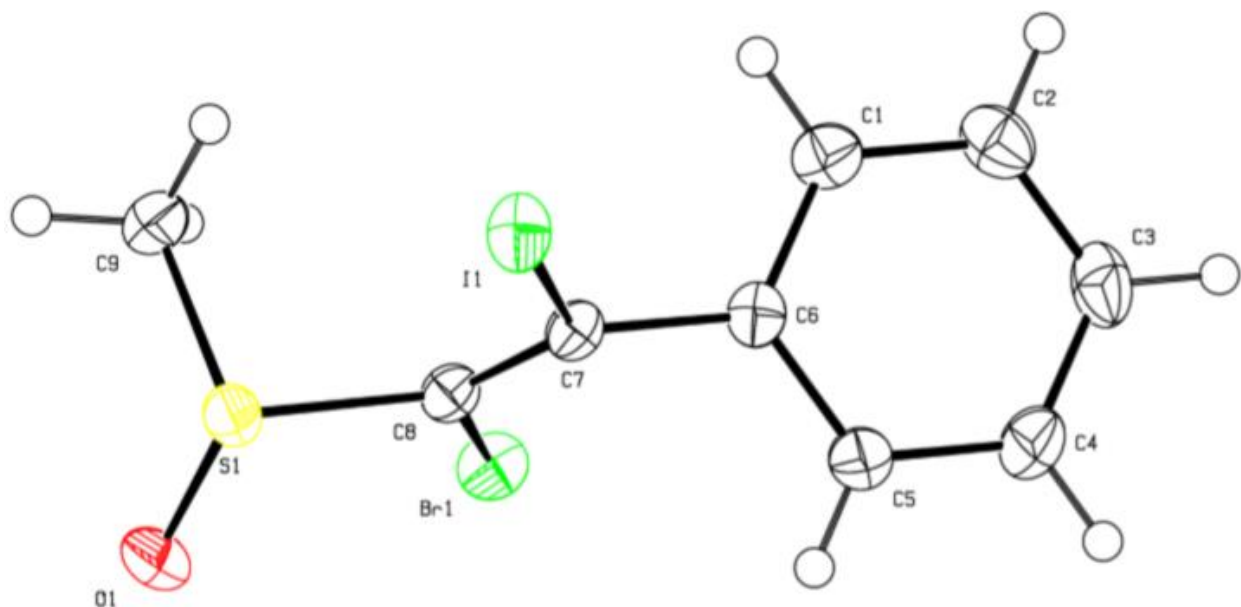

**Table S37. Crystal data and structure refinement for 20191031LI\_ZNZ2648\_0m\_a.**

|                                 |                                        |               |
|---------------------------------|----------------------------------------|---------------|
| Identification code             | 20191031LI_ZNZ2648_0m_a                |               |
| Empirical formula               | C <sub>9</sub> H <sub>8</sub> Br I O S |               |
| Formula weight                  | 371.02                                 |               |
| Temperature                     | 193(2) K                               |               |
| Wavelength                      | 0.71073 Å                              |               |
| Crystal system                  | Monoclinic                             |               |
| Space group                     | P2 <sub>1</sub> /n                     |               |
| Unit cell dimensions            | a = 5.6374(3) Å                        | = 90°.        |
|                                 | b = 10.8292(5) Å                       | = 92.333(2)°. |
|                                 | c = 18.2279(10) Å                      | = 90°.        |
| Volume                          | 1111.86(10) Å <sup>3</sup>             |               |
| Z                               | 4                                      |               |
| Density (calculated)            | 2.216 Mg/m <sup>3</sup>                |               |
| Absorption coefficient          | 6.621 mm <sup>-1</sup>                 |               |
| F(000)                          | 696                                    |               |
| Crystal size                    | 0.120 x 0.110 x 0.090 mm <sup>3</sup>  |               |
| Theta range for data collection | 2.923 to 28.329°.                      |               |
| Index ranges                    | -7<=h<=7, -14<=k<=13, -24<=l<=22       |               |
| Reflections collected           | 10610                                  |               |
| Independent reflections         | 2748 [R(int) = 0.0233]                 |               |

|                                   |                                             |
|-----------------------------------|---------------------------------------------|
| Completeness to theta = 25.242°   | 98.8 %                                      |
| Absorption correction             | Semi-empirical from equivalents             |
| Max. and min. transmission        | 0.3343 and 0.2350                           |
| Refinement method                 | Full-matrix least-squares on F <sup>2</sup> |
| Data / restraints / parameters    | 2748 / 0 / 119                              |
| Goodness-of-fit on F <sup>2</sup> | 1.066                                       |
| Final R indices [I>2sigma(I)]     | R1 = 0.0183, wR2 = 0.0452                   |
| R indices (all data)              | R1 = 0.0202, wR2 = 0.0459                   |
| Extinction coefficient            | n/a                                         |
| Largest diff. peak and hole       | 0.697 and -1.019 e.Å <sup>-3</sup>          |

**Table S38. Atomic coordinates (  $\times 10^4$ ) and equivalent isotropic displacement parameters ( $\text{\AA}^2 \times 10^3$ ) for 20191031LI\_ZNZ2648\_0m\_a. U(eq) is defined as one third of the trace of the orthogonalized  $U_{ij}$  tensor.**

|       | x       | y       | z       | U(eq) |
|-------|---------|---------|---------|-------|
| I(1)  | 9844(1) | 5622(1) | 3852(1) | 29(1) |
| Br(1) | 3946(1) | 2825(1) | 2857(1) | 27(1) |
| S(1)  | 6007(1) | 5358(1) | 2374(1) | 25(1) |
| O(1)  | 3627(3) | 5347(2) | 1994(1) | 34(1) |
| C(7)  | 7362(3) | 4183(2) | 3677(1) | 22(1) |
| C(8)  | 6020(3) | 4160(2) | 3064(1) | 21(1) |
| C(6)  | 7396(3) | 3258(2) | 4274(1) | 23(1) |
| C(5)  | 5572(4) | 3234(2) | 4766(1) | 30(1) |
| C(1)  | 9284(4) | 2440(2) | 4372(1) | 28(1) |
| C(9)  | 7977(4) | 4598(2) | 1777(1) | 35(1) |
| C(4)  | 5650(4) | 2398(2) | 5340(2) | 36(1) |
| C(3)  | 7527(4) | 1585(2) | 5434(1) | 35(1) |
| C(2)  | 9336(4) | 1604(2) | 4941(2) | 33(1) |

**Table S39. Bond lengths [Å] and angles [°] for 20191031LI\_ZNZ2648\_0m\_a.**

---

|                 |            |
|-----------------|------------|
| I(1)-C(7)       | 2.1098(19) |
| Br(1)-C(8)      | 1.8885(19) |
| S(1)-O(1)       | 1.4852(16) |
| S(1)-C(9)       | 1.788(2)   |
| S(1)-C(8)       | 1.806(2)   |
| C(7)-C(8)       | 1.323(3)   |
| C(7)-C(6)       | 1.479(3)   |
| C(6)-C(1)       | 1.390(3)   |
| C(6)-C(5)       | 1.393(3)   |
| C(5)-C(4)       | 1.384(3)   |
| C(5)-H(5)       | 0.9500     |
| C(1)-C(2)       | 1.377(3)   |
| C(1)-H(1)       | 0.9500     |
| C(9)-H(9A)      | 0.9800     |
| C(9)-H(9B)      | 0.9800     |
| C(9)-H(9C)      | 0.9800     |
| C(4)-C(3)       | 1.382(3)   |
| C(4)-H(4)       | 0.9500     |
| C(3)-C(2)       | 1.386(4)   |
| C(3)-H(3)       | 0.9500     |
| C(2)-H(2)       | 0.9500     |
| O(1)-S(1)-C(9)  | 106.46(11) |
| O(1)-S(1)-C(8)  | 107.26(10) |
| C(9)-S(1)-C(8)  | 96.21(11)  |
| C(8)-C(7)-C(6)  | 126.73(18) |
| C(8)-C(7)-I(1)  | 119.65(15) |
| C(6)-C(7)-I(1)  | 113.59(14) |
| C(7)-C(8)-S(1)  | 124.04(16) |
| C(7)-C(8)-Br(1) | 120.73(16) |
| S(1)-C(8)-Br(1) | 115.23(11) |
| C(1)-C(6)-C(5)  | 119.1(2)   |
| C(1)-C(6)-C(7)  | 120.88(19) |
| C(5)-C(6)-C(7)  | 119.91(19) |

|                  |          |
|------------------|----------|
| C(4)-C(5)-C(6)   | 119.9(2) |
| C(4)-C(5)-H(5)   | 120.1    |
| C(6)-C(5)-H(5)   | 120.1    |
| C(2)-C(1)-C(6)   | 120.6(2) |
| C(2)-C(1)-H(1)   | 119.7    |
| C(6)-C(1)-H(1)   | 119.7    |
| S(1)-C(9)-H(9A)  | 109.5    |
| S(1)-C(9)-H(9B)  | 109.5    |
| H(9A)-C(9)-H(9B) | 109.5    |
| S(1)-C(9)-H(9C)  | 109.5    |
| H(9A)-C(9)-H(9C) | 109.5    |
| H(9B)-C(9)-H(9C) | 109.5    |
| C(3)-C(4)-C(5)   | 120.7(2) |
| C(3)-C(4)-H(4)   | 119.6    |
| C(5)-C(4)-H(4)   | 119.6    |
| C(4)-C(3)-C(2)   | 119.4(2) |
| C(4)-C(3)-H(3)   | 120.3    |
| C(2)-C(3)-H(3)   | 120.3    |
| C(1)-C(2)-C(3)   | 120.3(2) |
| C(1)-C(2)-H(2)   | 119.9    |
| C(3)-C(2)-H(2)   | 119.9    |

---

Symmetry transformations used to generate equivalent atoms:

**Table S40. Anisotropic displacement parameters ( $\text{\AA}^2 \times 10^3$ ) for 20191031LI\_ZNZ 2648\_0m\_a. The anisotropic displacement factor exponent takes the form:  $-2 \text{ h}^2 \text{ a}^*2\text{U}11 + \dots + 2 \text{ h k a}^* \text{ b}^* \text{ U}12$  ]**

|       | U <sup>11</sup> | U <sup>22</sup> | U <sup>33</sup> | U <sup>23</sup> | U <sup>13</sup> | U <sup>12</sup> |
|-------|-----------------|-----------------|-----------------|-----------------|-----------------|-----------------|
| I(1)  | 33(1)           | 28(1)           | 27(1)           | 1(1)            | -3(1)           | -10(1)          |
| Br(1) | 26(1)           | 27(1)           | 29(1)           | -5(1)           | 0(1)            | -6(1)           |
| S(1)  | 25(1)           | 25(1)           | 23(1)           | 2(1)            | -1(1)           | 1(1)            |
| O(1)  | 24(1)           | 42(1)           | 36(1)           | 8(1)            | -4(1)           | 6(1)            |
| C(7)  | 22(1)           | 22(1)           | 21(1)           | -1(1)           | 3(1)            | -3(1)           |
| C(8)  | 22(1)           | 21(1)           | 21(1)           | -2(1)           | 3(1)            | -1(1)           |

|      |       |       |       |       |       |       |
|------|-------|-------|-------|-------|-------|-------|
| C(6) | 24(1) | 22(1) | 22(1) | 0(1)  | -1(1) | -5(1) |
| C(5) | 24(1) | 34(1) | 31(1) | 6(1)  | 2(1)  | 1(1)  |
| C(1) | 29(1) | 23(1) | 32(1) | -3(1) | 4(1)  | -1(1) |
| C(9) | 28(1) | 50(1) | 26(1) | 4(1)  | 7(1)  | 6(1)  |
| C(4) | 31(1) | 44(1) | 34(1) | 10(1) | 7(1)  | -4(1) |
| C(3) | 40(1) | 30(1) | 35(1) | 13(1) | -4(1) | -8(1) |
| C(2) | 34(1) | 22(1) | 42(2) | 2(1)  | -3(1) | 1(1)  |

**Table S41. Hydrogen coordinates (  $\times 10^4$ ) and isotropic displacement parameters ( $\text{\AA}^2 \times 10^3$ ) for 20191031LI\_ZNZ2648\_0m\_a.**

|       | x     | y    | z    | U(eq) |
|-------|-------|------|------|-------|
| H(5)  | 4276  | 3791 | 4708 | 36    |
| H(1)  | 10550 | 2459 | 4043 | 33    |
| H(9A) | 7367  | 3771 | 1659 | 52    |
| H(9B) | 9553  | 4529 | 2020 | 52    |
| H(9C) | 8090  | 5077 | 1323 | 52    |
| H(4)  | 4400  | 2382 | 5674 | 43    |
| H(3)  | 7578  | 1019 | 5832 | 42    |
| H(2)  | 10616 | 1037 | 4996 | 39    |

## 32. References

1. Bortolini, O.; Bottai, M.; Chiappe, C.; Conte, V.; Pieraccini, D., (2002). Trihalide-based ionic liquids. Reagent-solvents for stereoselective iodination of alkenes and alkynes. *Green Chemistry* *4*, 621-627.
2. Barluenga, J.; Rodriguez, M. A.; Campos, P. J.; Asensio, G., (1988). Synthesis of 2-functionalized 1,1-diiodo-1-alkenes. Generation and reactions of 1-iodo-1-lithio-1-alkenes and 1,1-dilithio-1-alkenes. *J. Am. Chem. Soc.* *110*, 5567-5568.
3. Heasley, V. L.; Buczala, D. M.; Chappell, A. E.; Hill, D. J.; Whisenand, J. M.; Shellhamer, D. F., (2002). Addition of Bromine Chloride and Iodine Monochloride to Carbonyl-Conjugated, Acetylenic Ketones: Synthesis and Mechanisms. *J. Org. Chem.* *67*, 2183-2187.
4. Ho, M. L.; Flynn, A. B.; Ogilvie, W. W., (2007). Single-Isomer Iodochlorination of Alkynes and Chlorination of Alkenes Using Tetrabutylammonium Iodide and Dichloroethane. *J. Org. Chem.* *72*, 977-983.
5. Lemay, A. B.; Vulic, K. S.; Ogilvie, W. W., (2006). Single-Isomer Tetrasubstituted Olefins from Regioselective and Stereospecific Palladium-Catalyzed Coupling of  $\beta$ -Chloro- $\alpha$ -iodo- $\alpha,\beta$ -unsaturated Esters. *J. Org. Chem.* *71*, 3615-3618.
6. Maji, B.; Bhattacharya, A.; Hazra, S., (2017). Halogen-Induced Friedel-Crafts Alkenylation Reactions with Haloalkynes: Direct Access to gem-1, 1-Dihaloalkenes. *ChemistrySelect* *2*, 10375-10378.
7. Rao, D. S.; Reddy, T. R.; Kashyap, S., (2018). Chemoselective and stereospecific iodination of alkynes using sulfonium iodate(i) salt. *Org. Biomol. Chem.* *16*, 1508-1518.
8. Banothu, R.; Peraka, S.; Kodumuri, S.; Chevella, D.; Gajula, K. S.; Amrutham, V.; Yennamaneni, D. R.; Nama, N., (2018). An aqueous medium-controlled stereospecific oxidative iodination of alkynes: efficient access to (E)-diiodoalkene derivatives. *New J. Chem.* *42*, 17879-17883.
9. Barluenga, J.; Rodríguez, M. A.; Campos, P. J., (1990). Synthesis of 2-functionalized 1-chloro-1-iodo-1-alkenes from 1-chloro-1-alkynes and IPy2BF<sub>4</sub>. *Tetrahedron Lett.* *31*, 2751-2754.
10. Ide, M.; Yauchi, Y.; Shiogai, R.; Iwasawa, T., (2014). Regio- and stereoselective synthesis of (E)-1-bromo-2-iodoalkenes through iodobromination of internal alkynes. *Tetrahedron* *70*, 8532-8538.
11. Xiang, J.; Yuan, R.; Wang, R.; Yi, N.; Lu, L.; Zou, H.; He, W., (2014). Method for Transforming Alkynes into (E)-Dibromoalkenes. *J. Org. Chem.* *79*, 11378-11382.
12. Berthelot, J.; Fournier, M., (1986). Bromation stéréosélective d'alcynes par le tribromure de tétrabutylammonium. *Can. J. Chem.* *64*, 603-607.
13. Liu, J.; Li, W.; Wang, C.; Li, Y.; Li, Z., (2011). Selective 1,2-dihalogenation and oxy-1,1-dihalogenation of alkynes by N-halosuccinimides. *Tetrahedron Lett.* *52*, 4320-4323.
14. Xia, X.-F.; Gu, Z.; Liu, W.; Wang, N.; Wang, H.; Xia, Y.; Gao, H.; Liu, X., (2014). Selective oxygenation of alkynes: a direct approach to diketones and vinyl acetate. *Org. Biomol. Chem.* *12*, 9909-9913.
15. Lu, L.-H.; Zhou, S.-J.; Sun, M.; Chen, J.-L.; Xia, W.; Yu, X.; Xu, X.; He, W.-M., (2019). Metal- and Solvent-Free Ultrasonic Multicomponent Synthesis of (Z)- $\beta$ -Iodo Vinylthiocyanates. *ACS Sustainable Chemistry & Engineering* *7*, 1574-1579.
16. Chen, X.; Kong, W.; Cai, H.; Kong, L.; Zhu, G., (2011). Palladium-catalyzed highly regio- and stereoselective synthesis of (1E)- or (1Z)-1,2-dihalo-1,4-dienes via haloallylation of alkynyl halides. *Chem. Commun.* *47*, 2164-2166.
17. Lin, Y.-m.; Lu, G.-p.; Cai, C.; Yi, W.-b., (2015). Odorless, One-Pot Regio- and Stereoselective Iodothiolation of Alkynes with Sodium Arenesulfonates under Metal-Free Conditions in Water. *Org. Lett.* *17*, 3310-3313.
18. Yates, K.; Go, T. A., (1980). Vinyl cation intermediates in electrophilic additions to triple bonds. 1. Chlorination of arylacetylenes. *J. Org. Chem.* *45*, 2377-2384.



### 33. Copies of NMR Spectra

Figure S19.  $^1\text{H-NMR}$  of 2

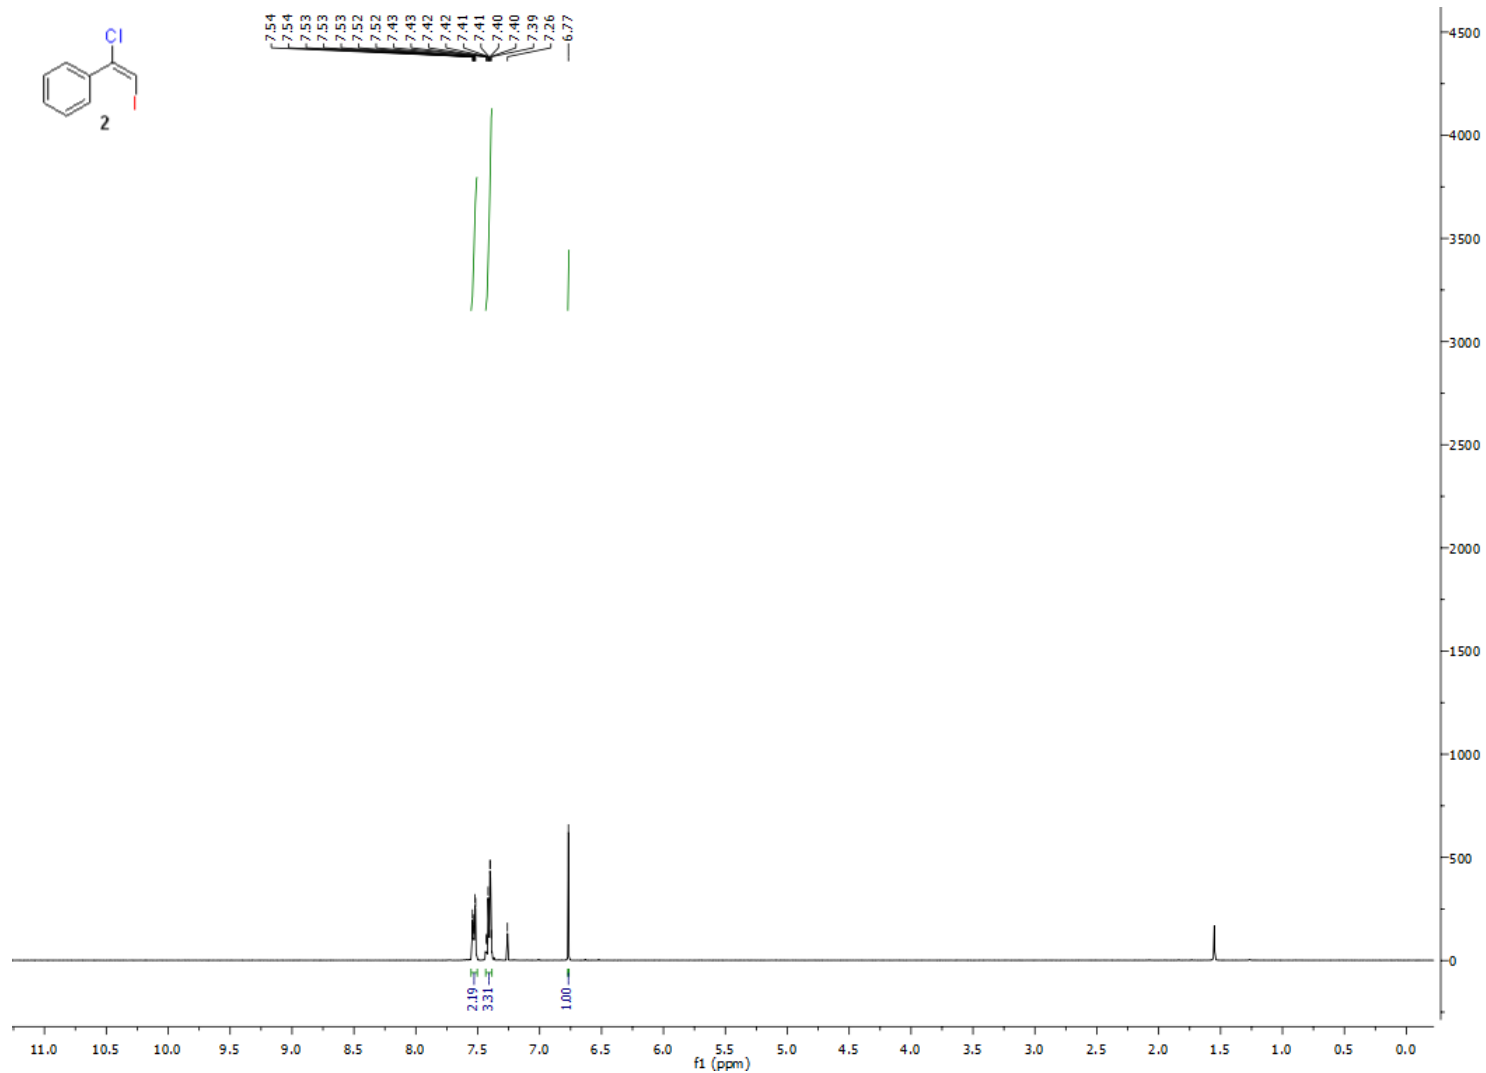

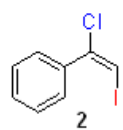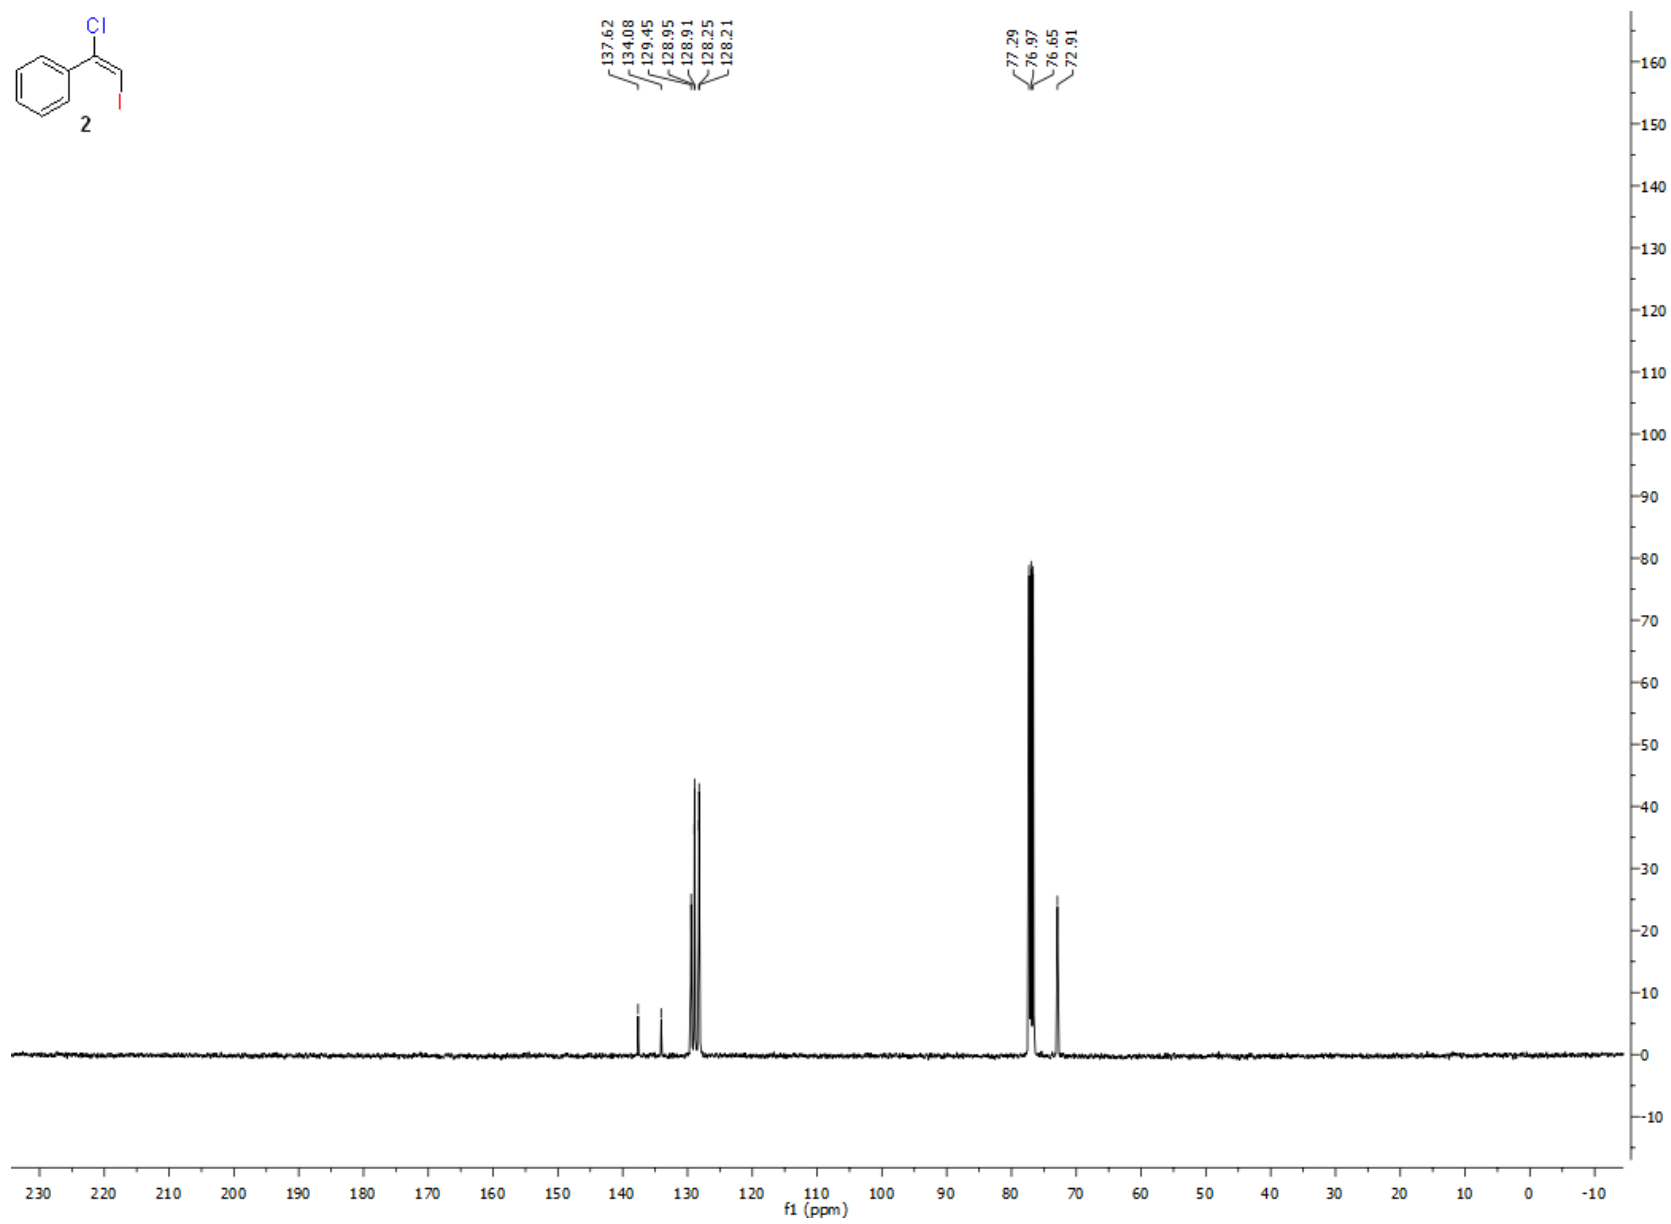

Figure S21. <sup>1</sup>H-NMR of 3

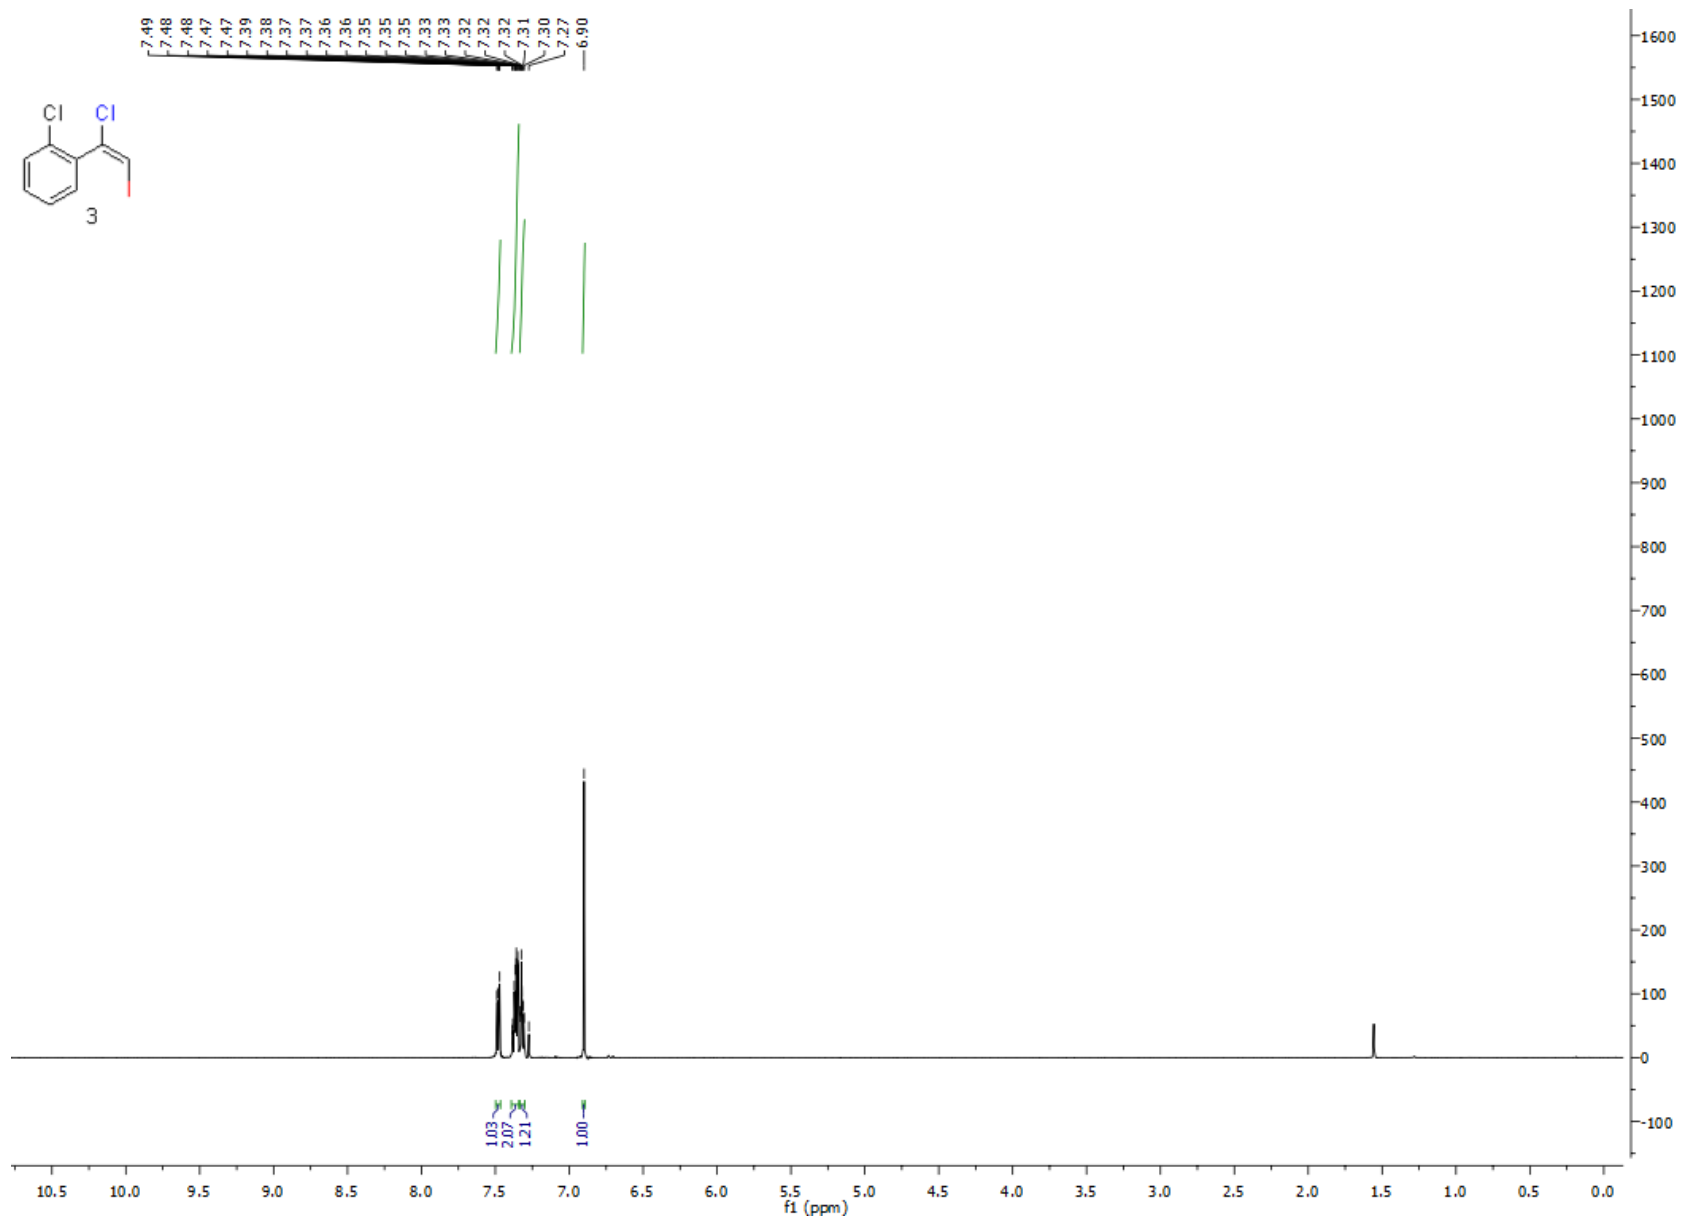

Figure S22.  $^{13}\text{C}$ -NMR of 3

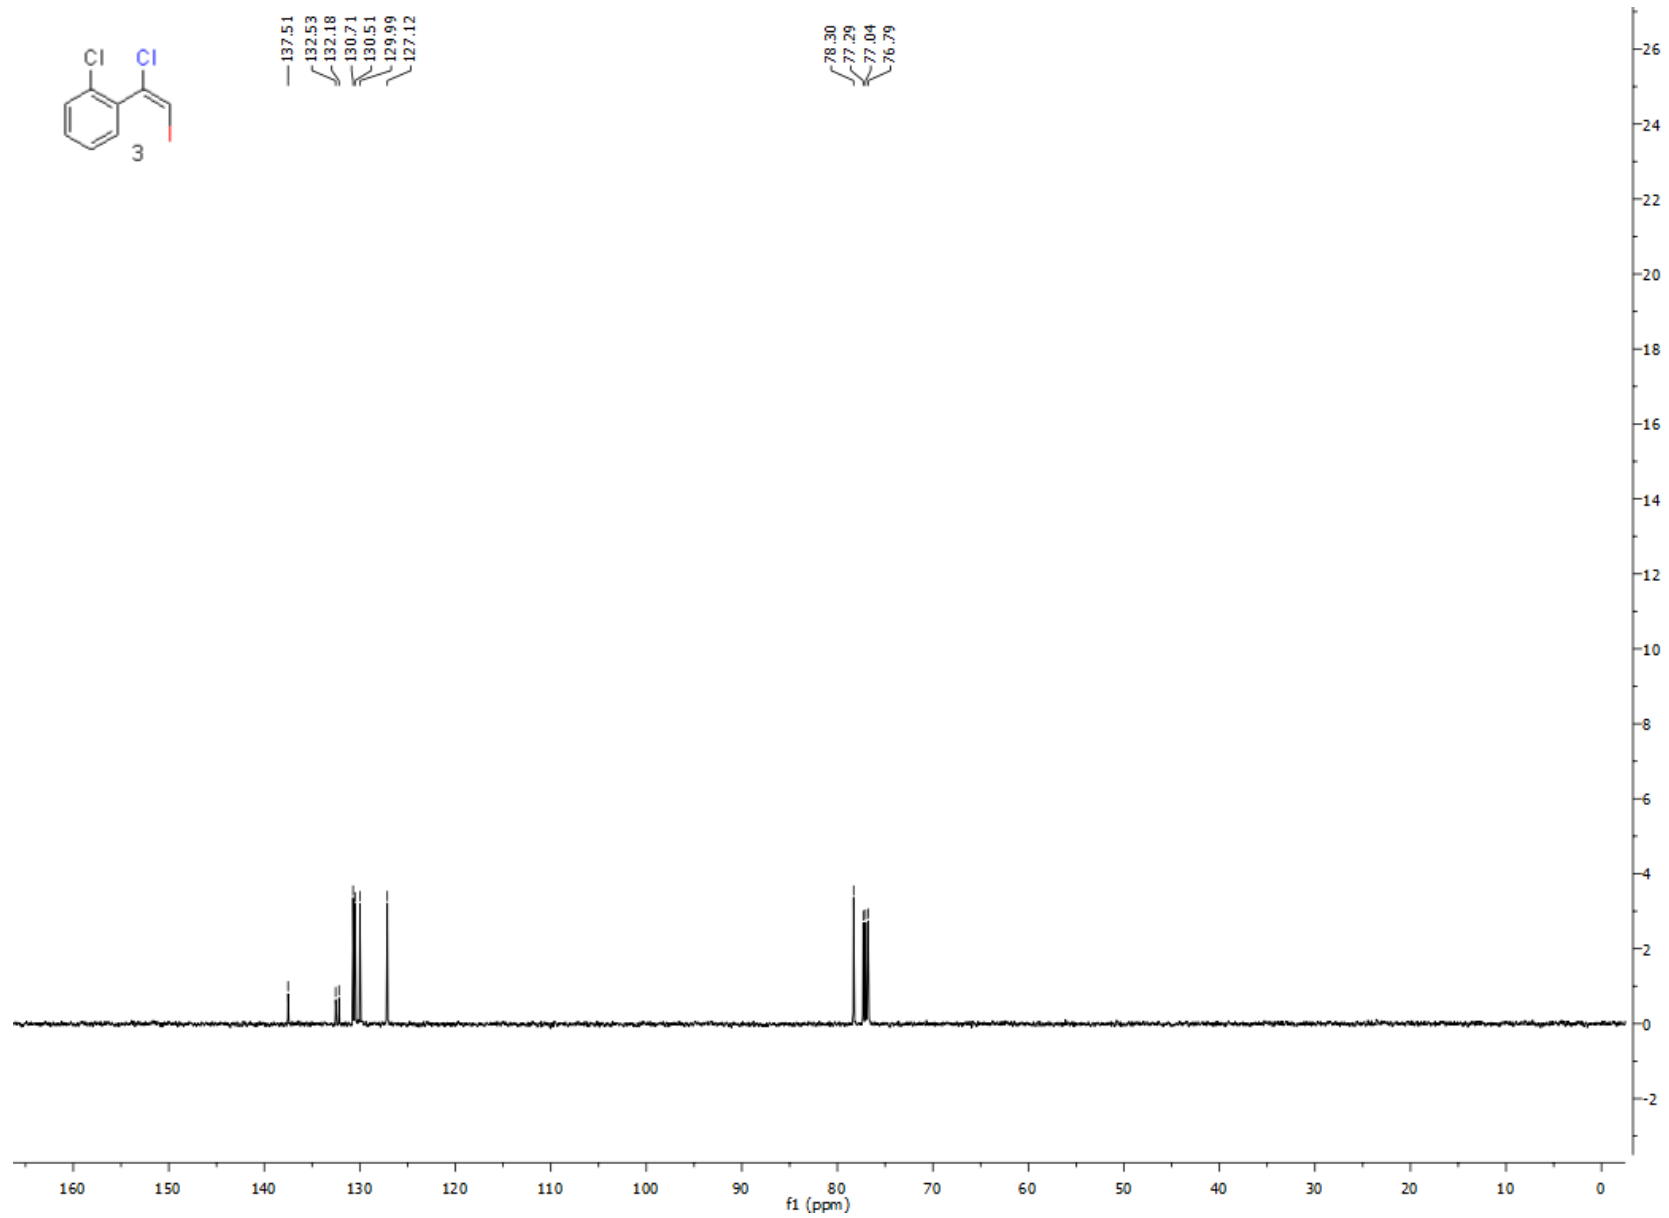

Figure S23. <sup>1</sup>H-NMR of 4

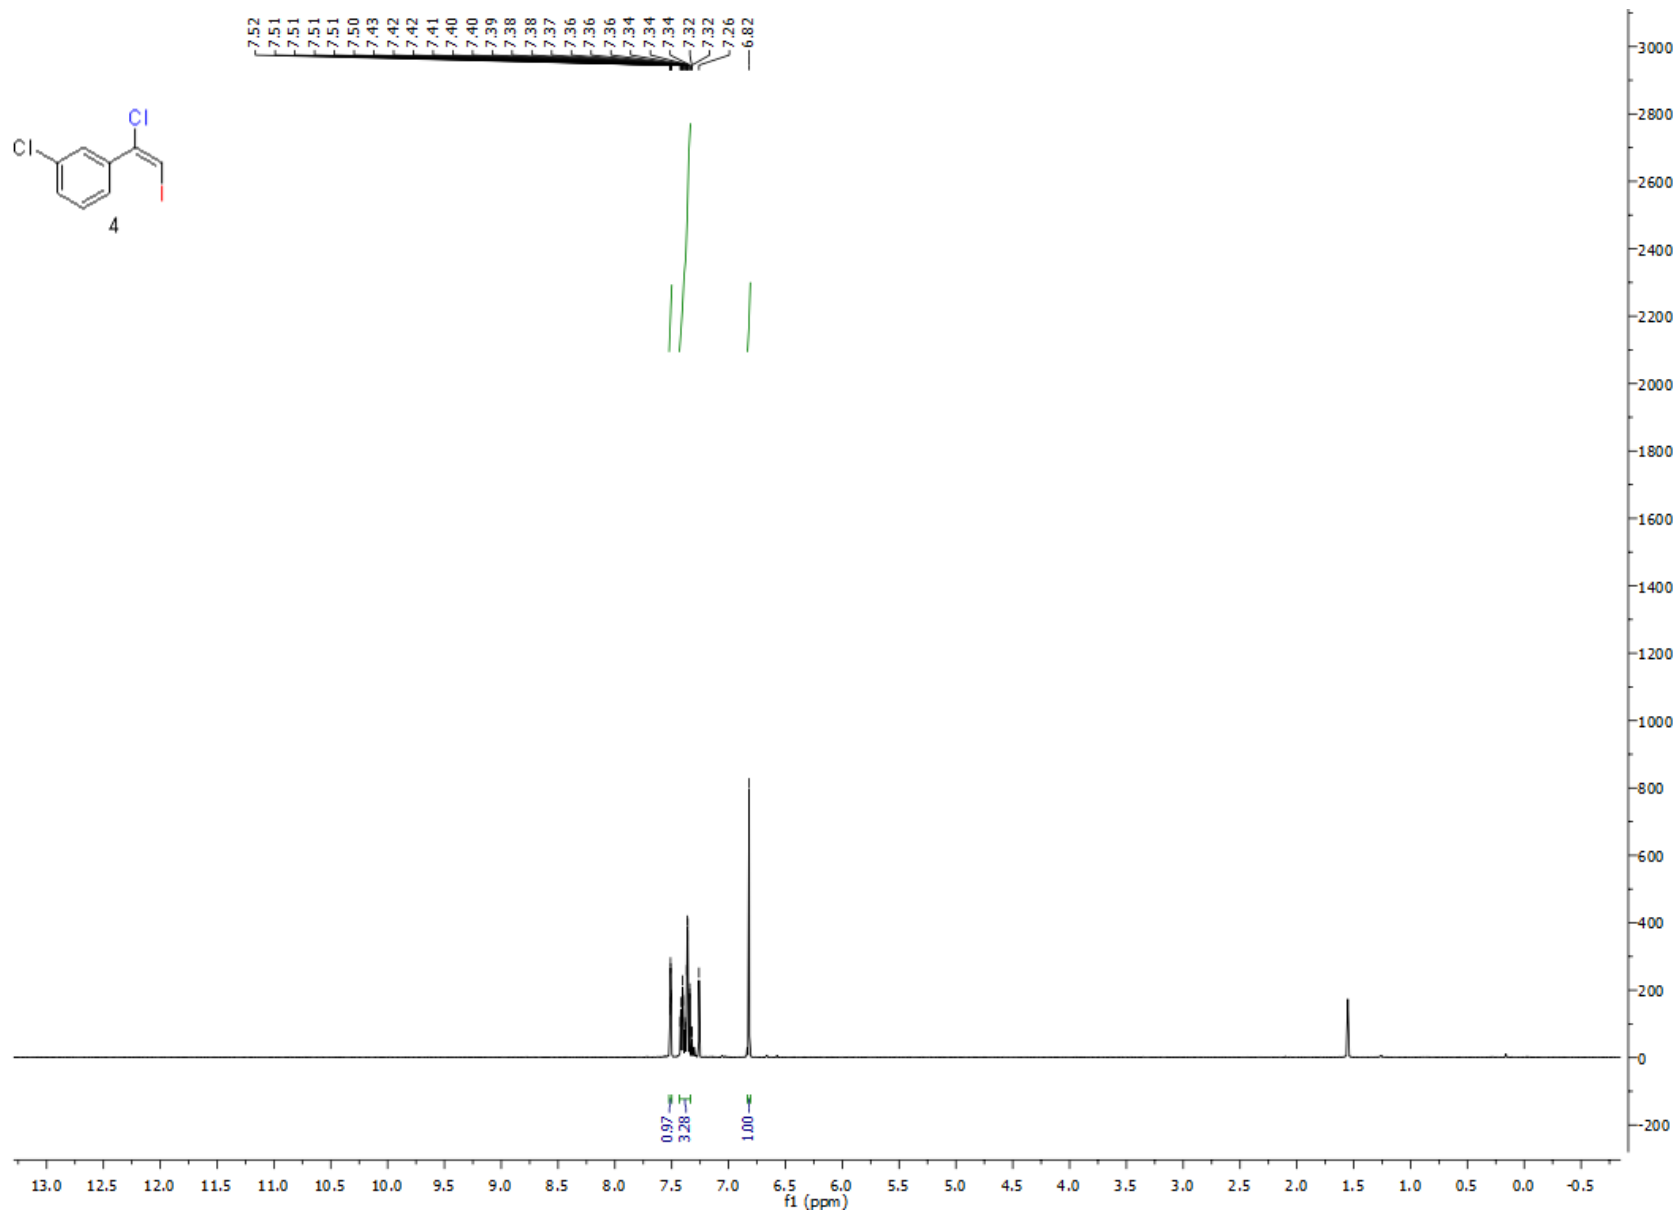

Figure S24. <sup>13</sup>C-NMR of 4

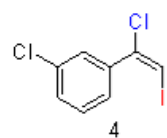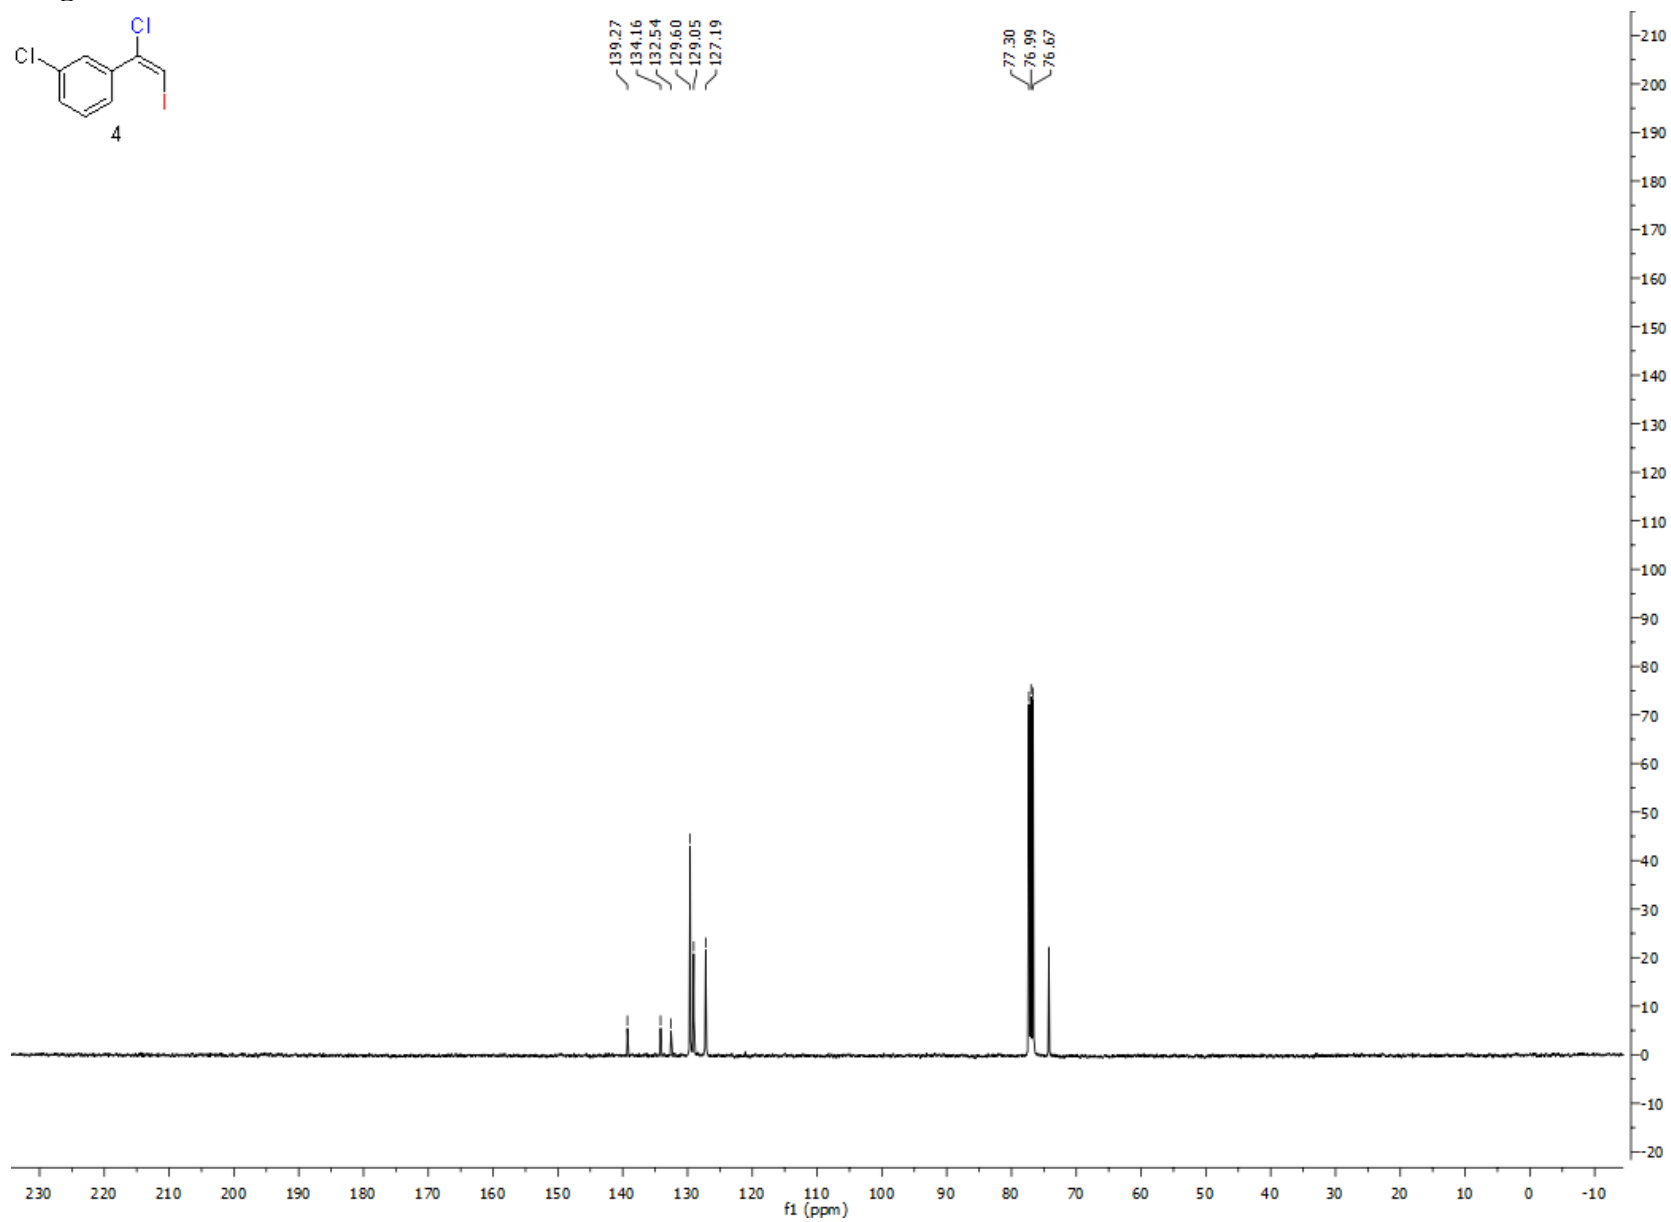

Figure S25.  $^1\text{H-NMR}$  of **5**

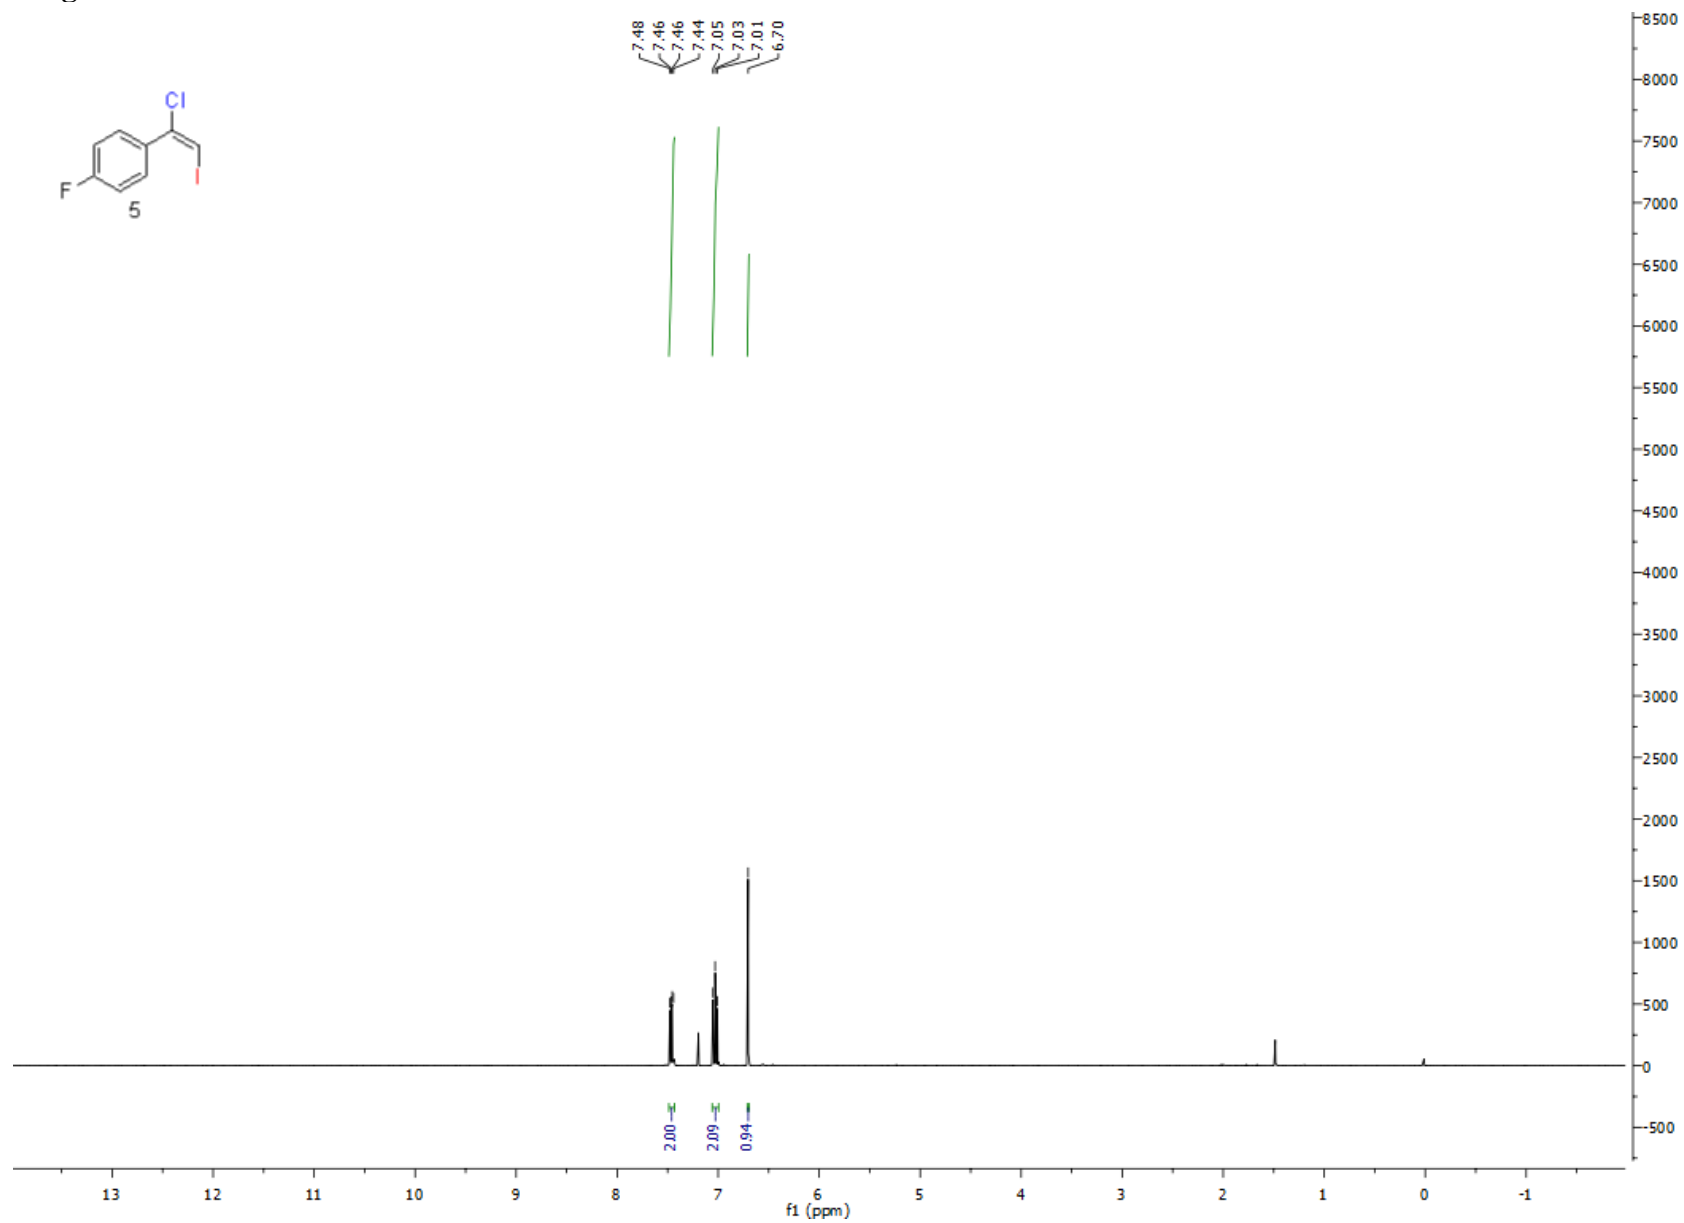

Figure S26.  $^{19}\text{F}$ -NMR of 5

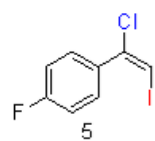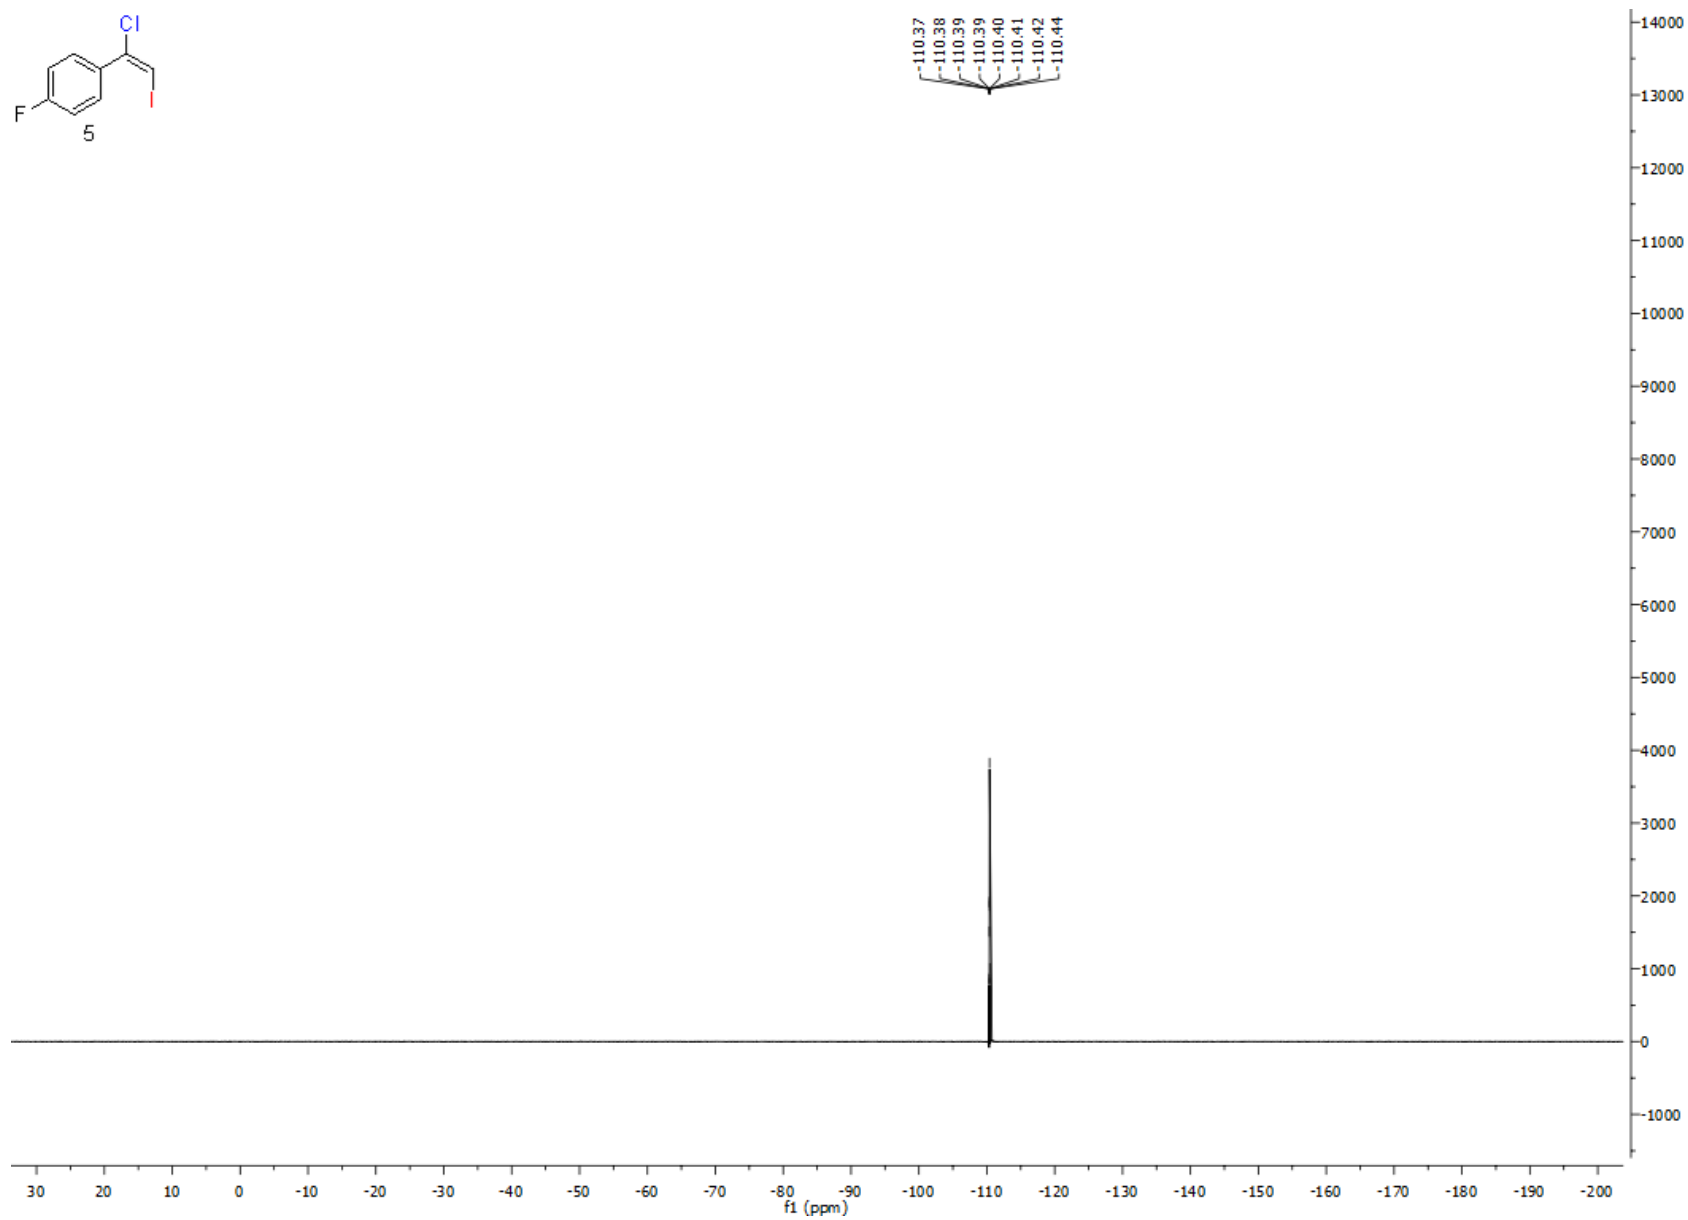



Figure S27.  $^{13}\text{C}$ -NMR of 5

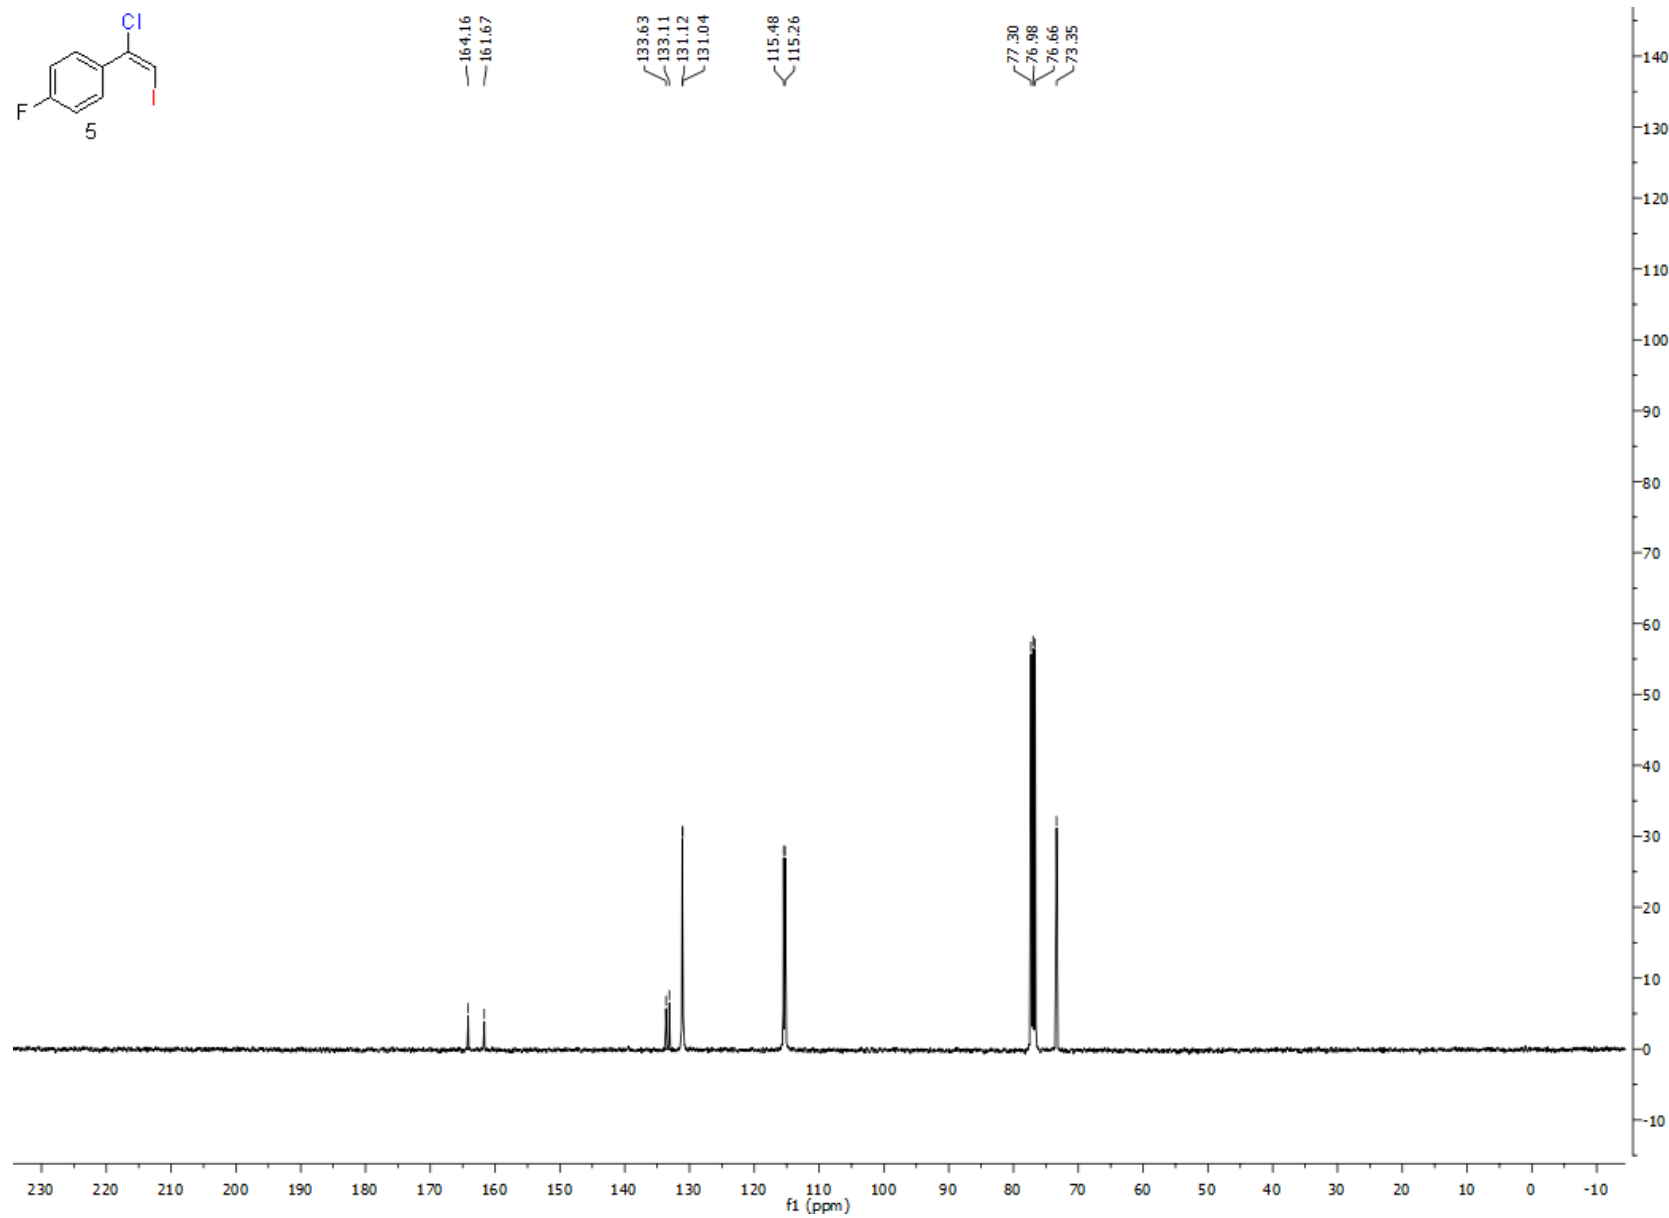

Figure S28. <sup>1</sup>H-NMR of 6

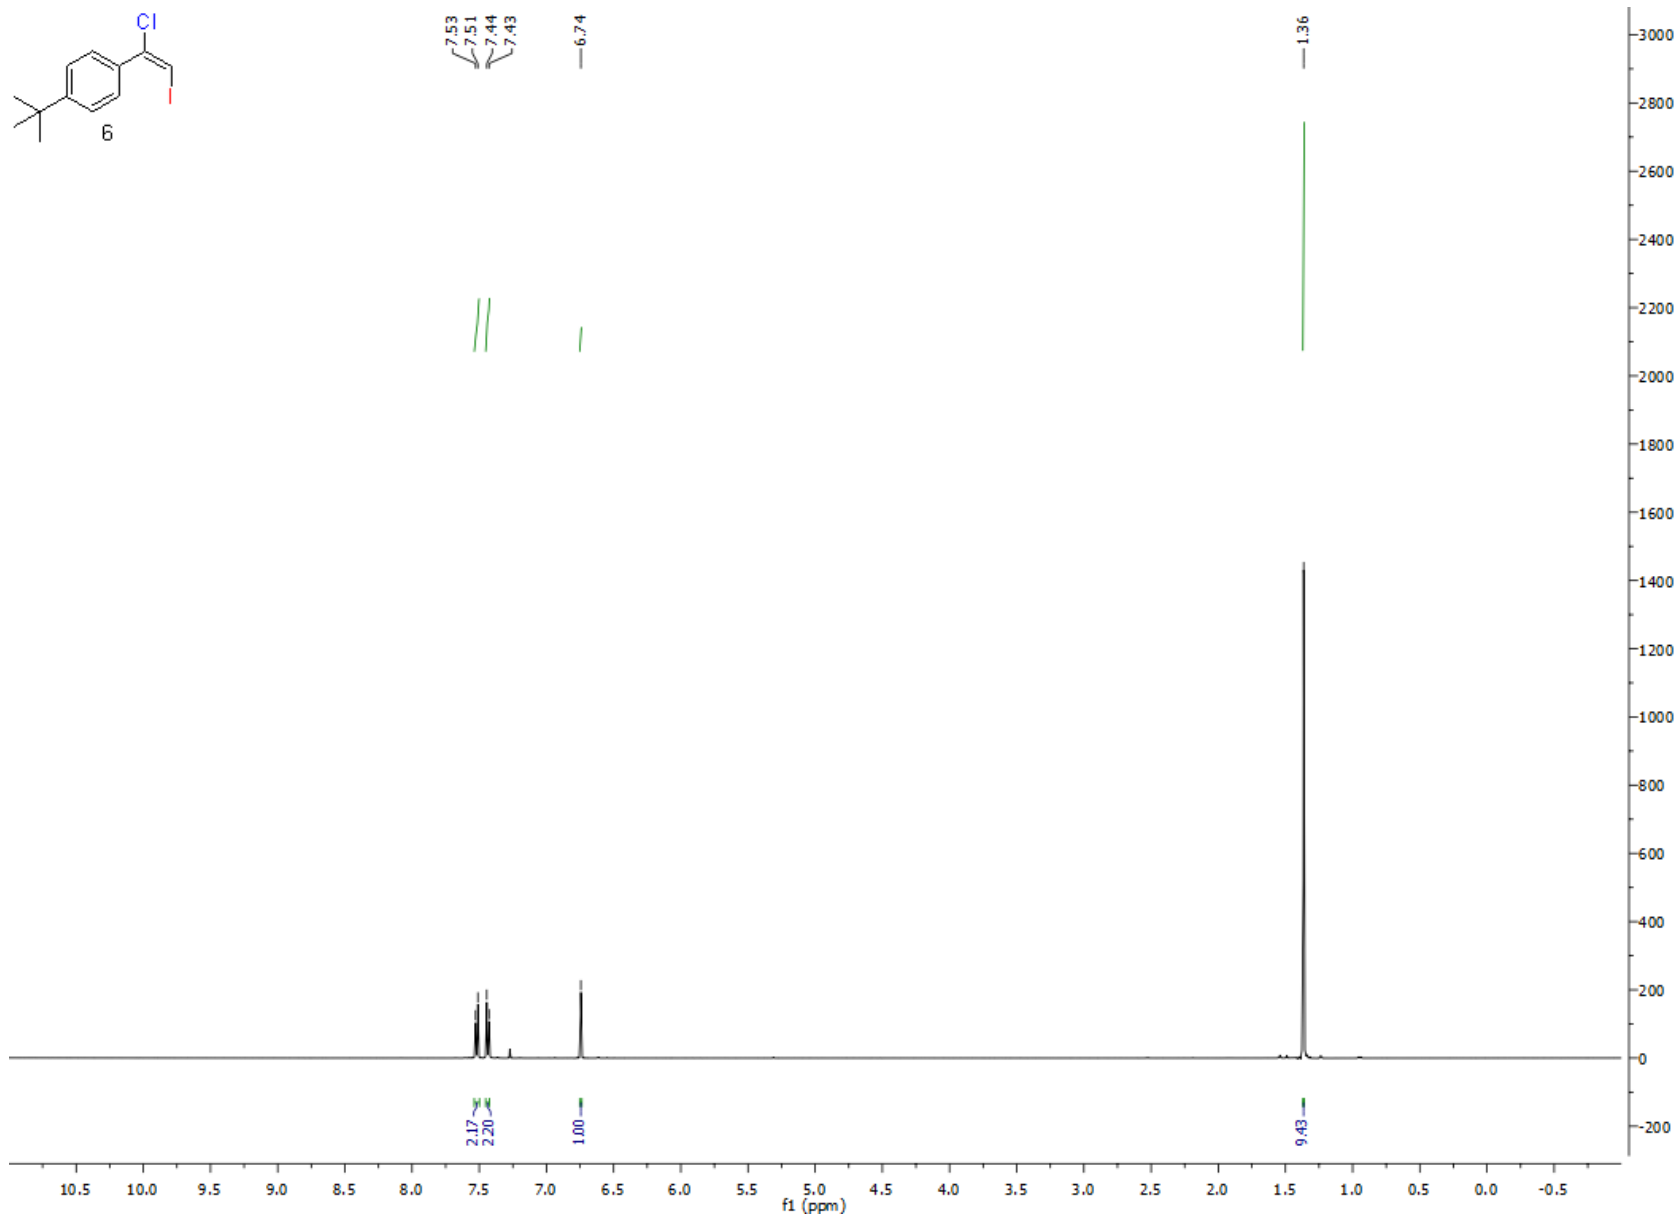

Figure S29.  $^{13}\text{C}$ -NMR of 6

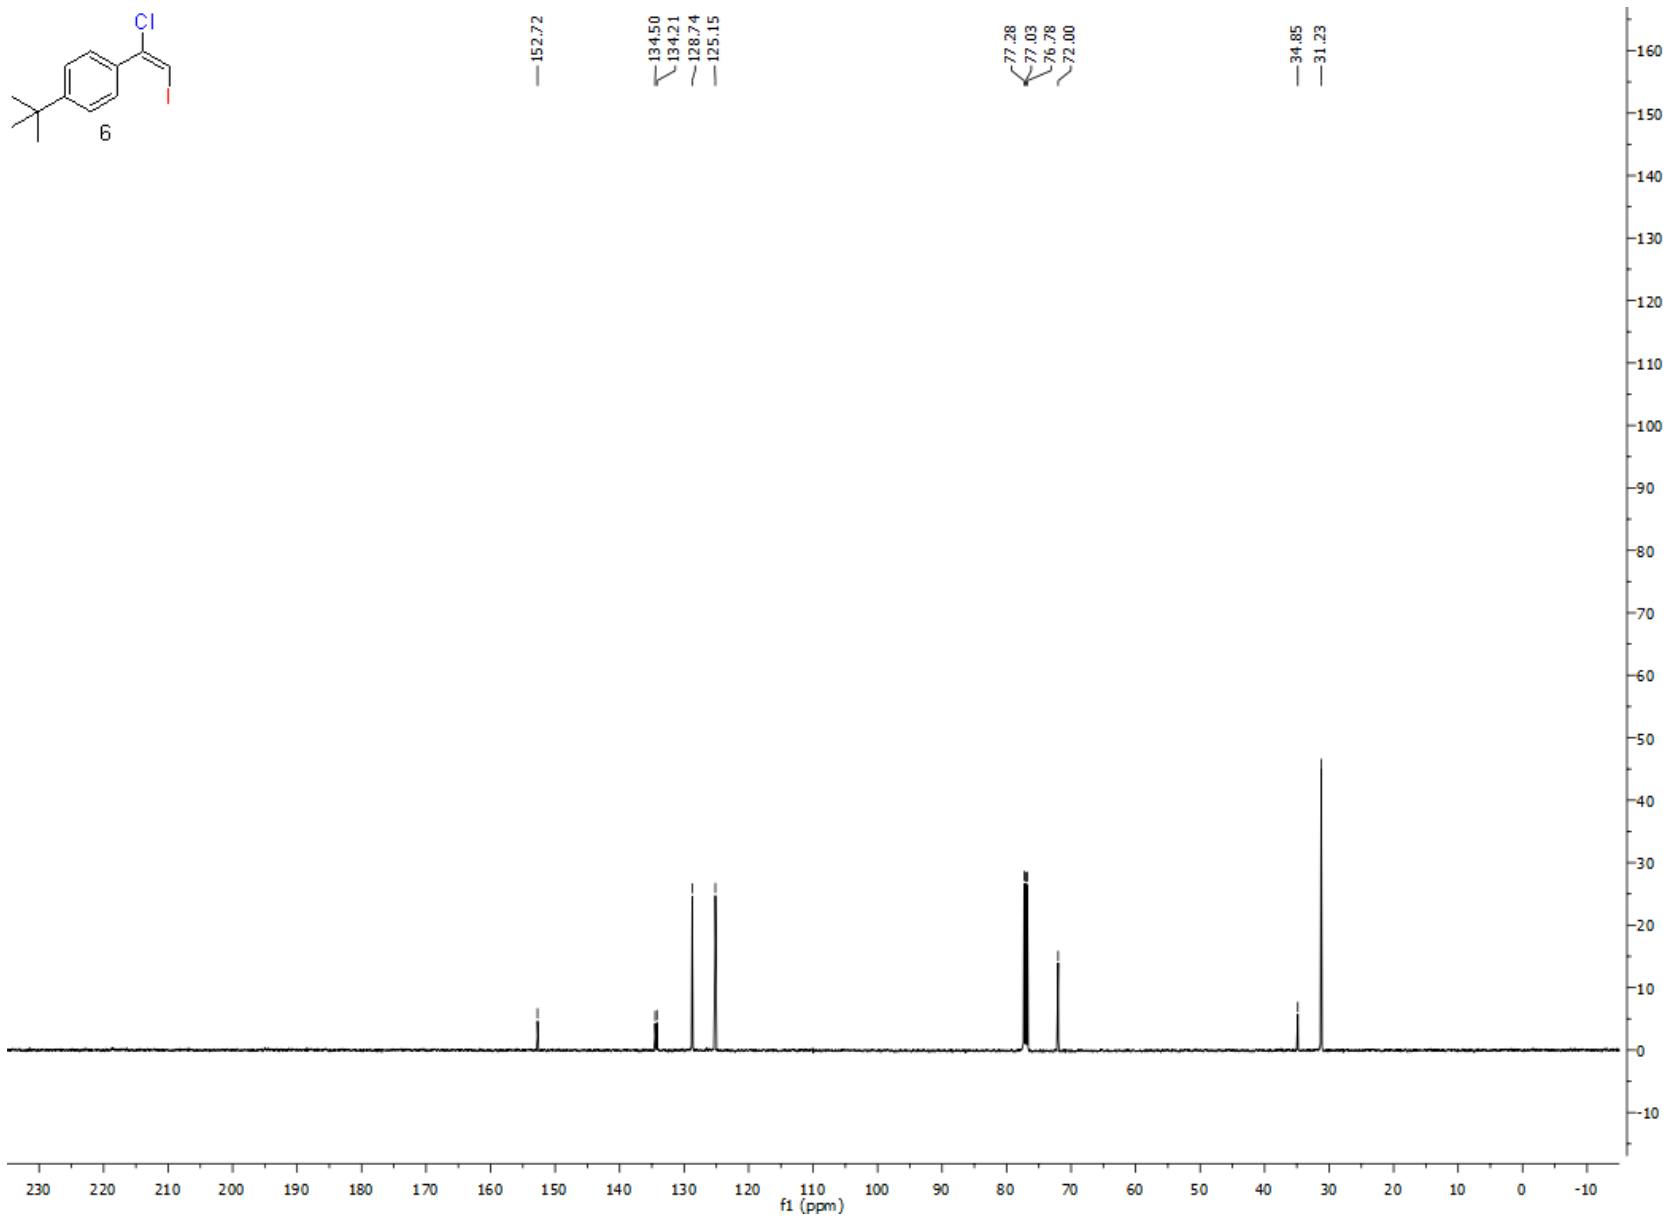

Figure S30. <sup>1</sup>H-NMR of 7

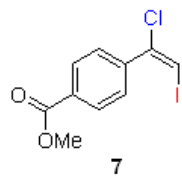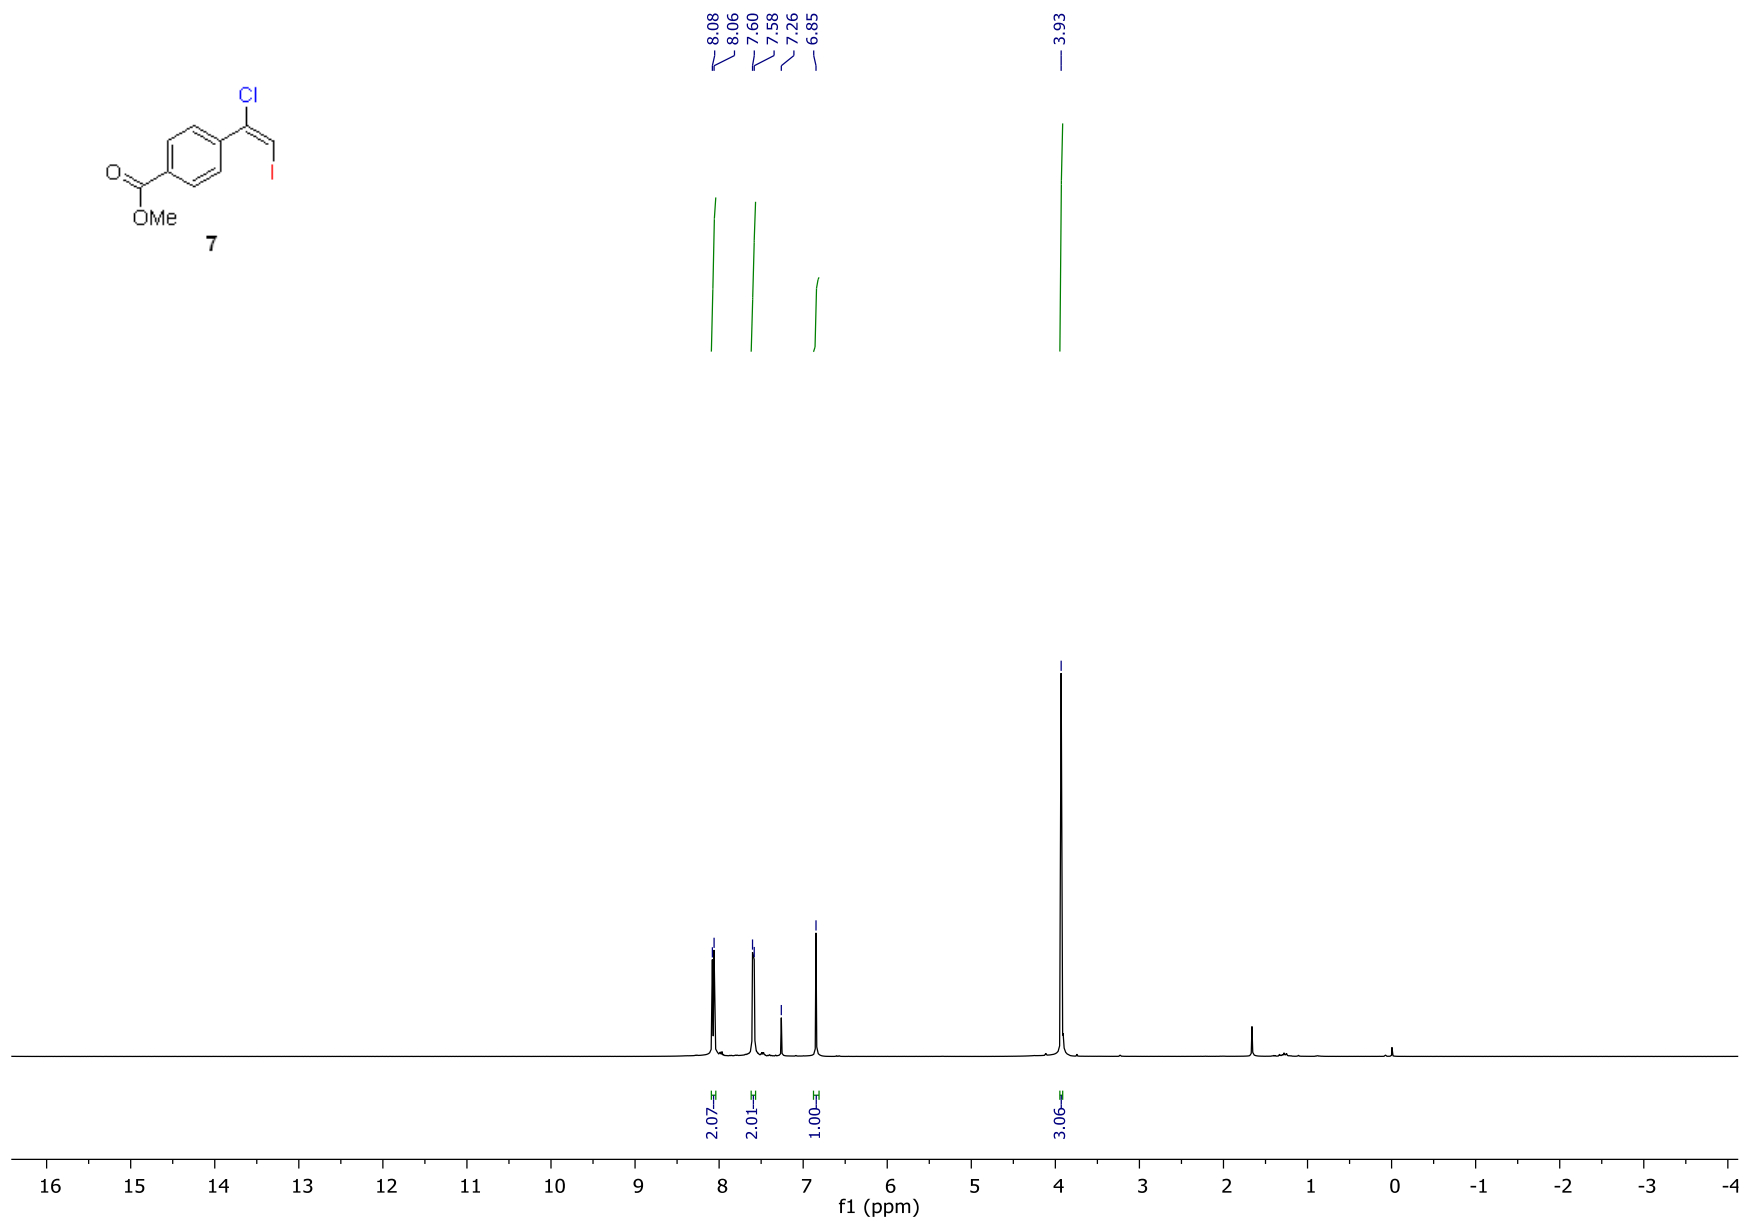

Figure S31.  $^{13}\text{C}$ -NMR of 7

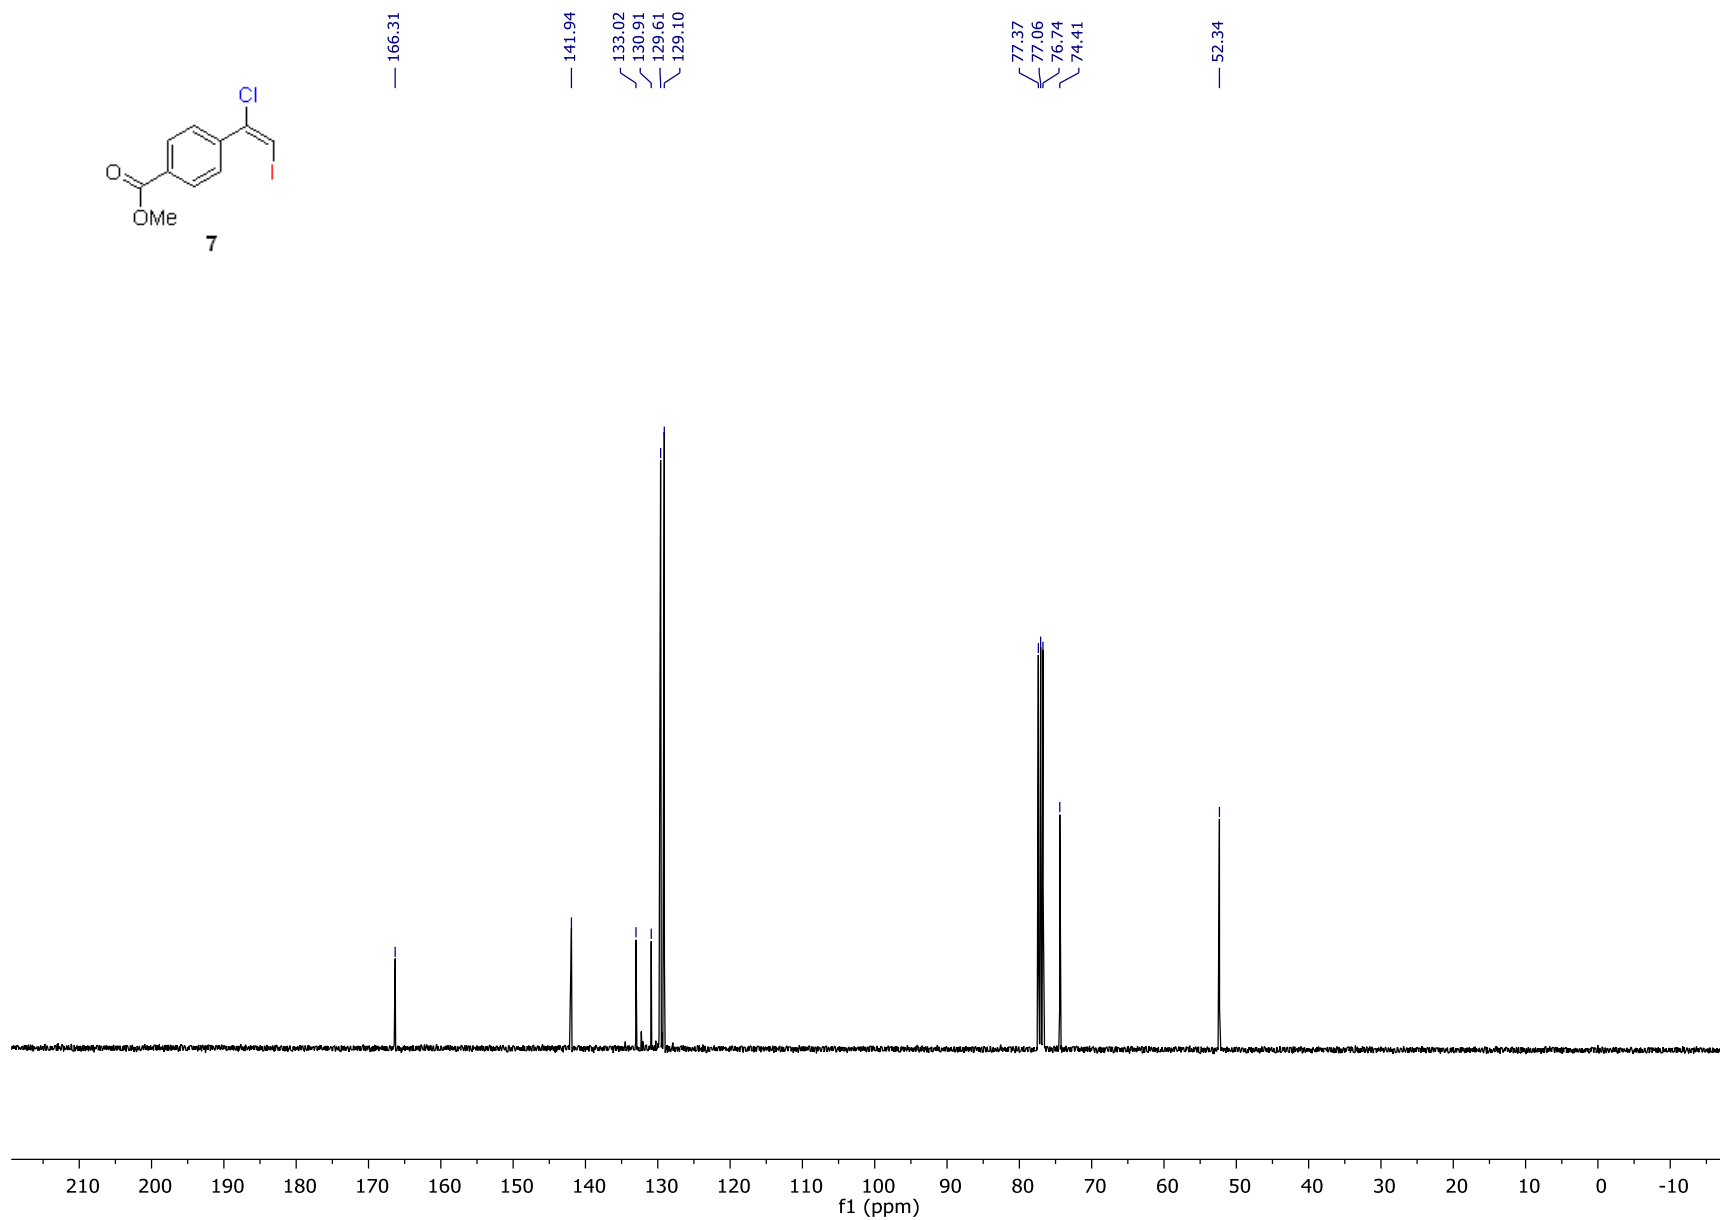

Figure S32. <sup>1</sup>H-NMR of **8**

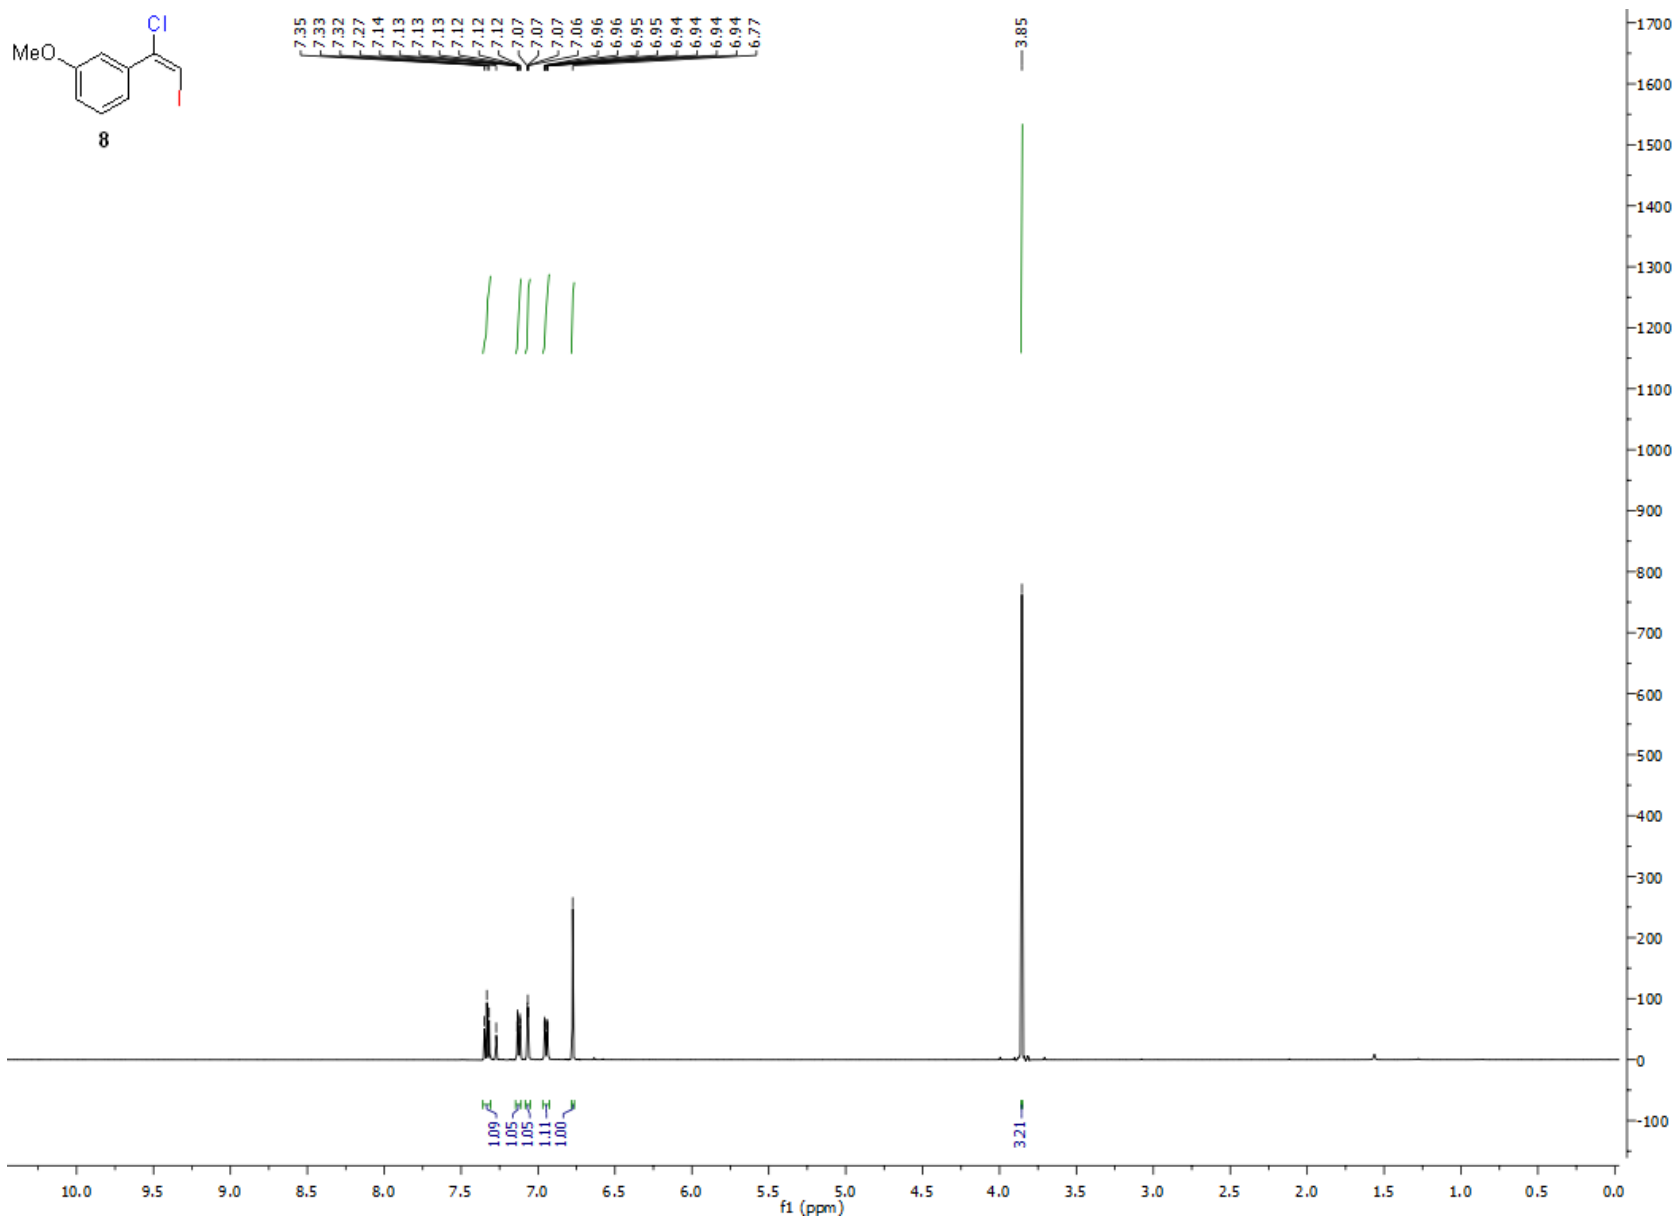

Figure S33. <sup>13</sup>C-NMR of 8

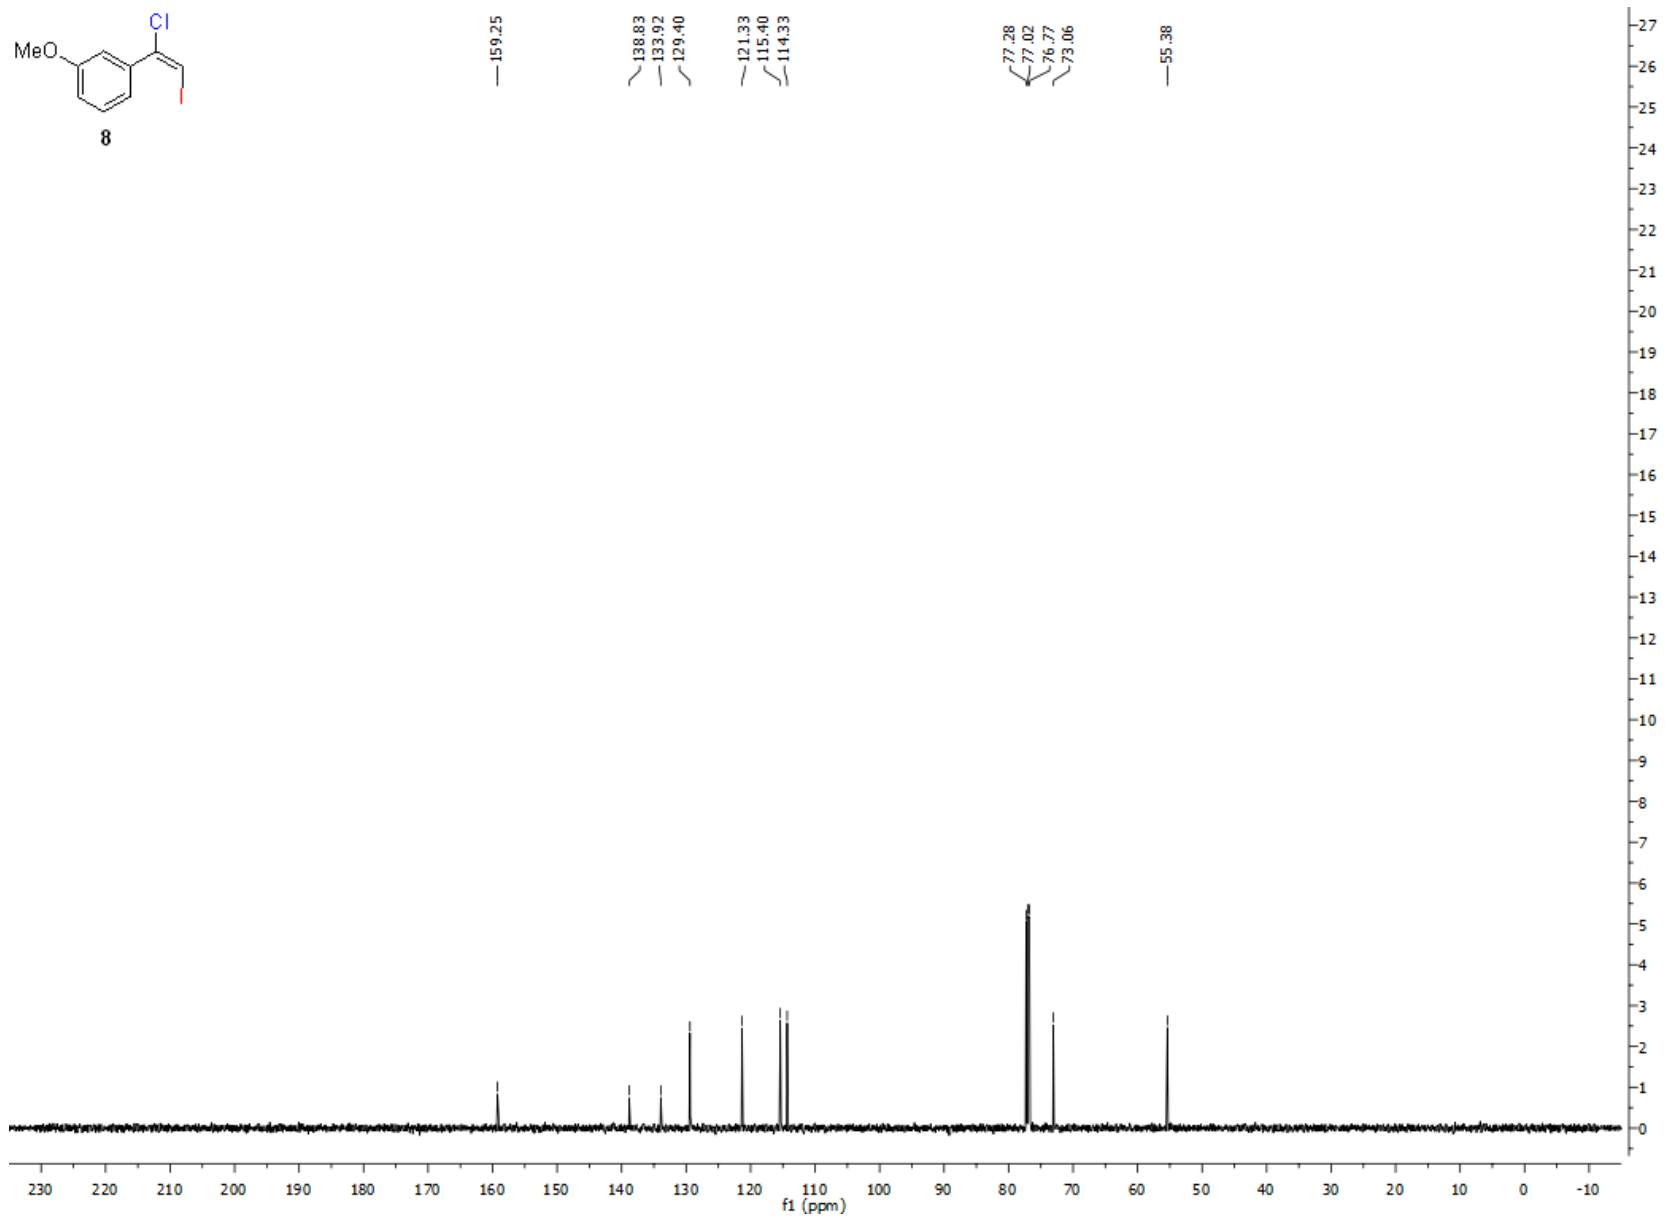

Figure S34. <sup>1</sup>H-NMR of **9**

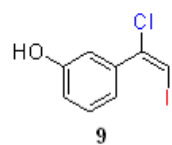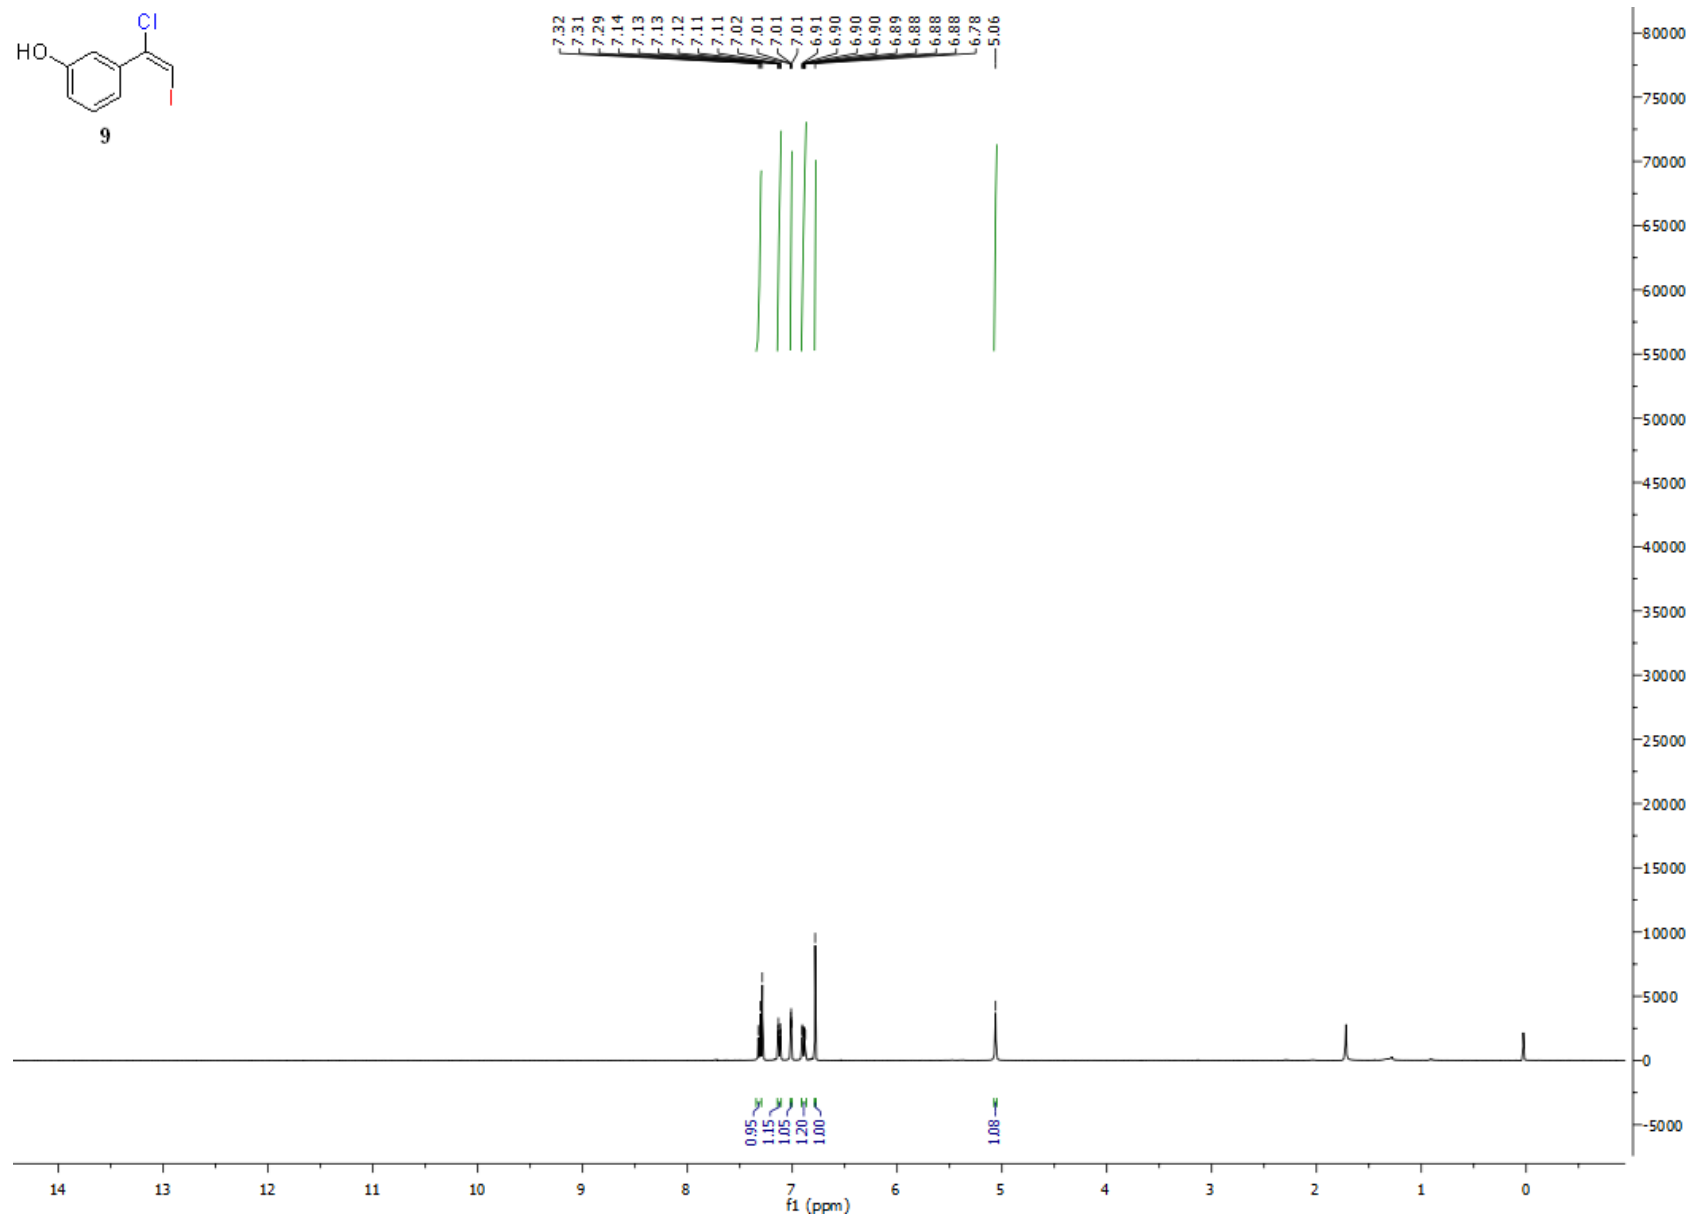



Figure S35.  $^{13}\text{C}$ -NMR of **9**

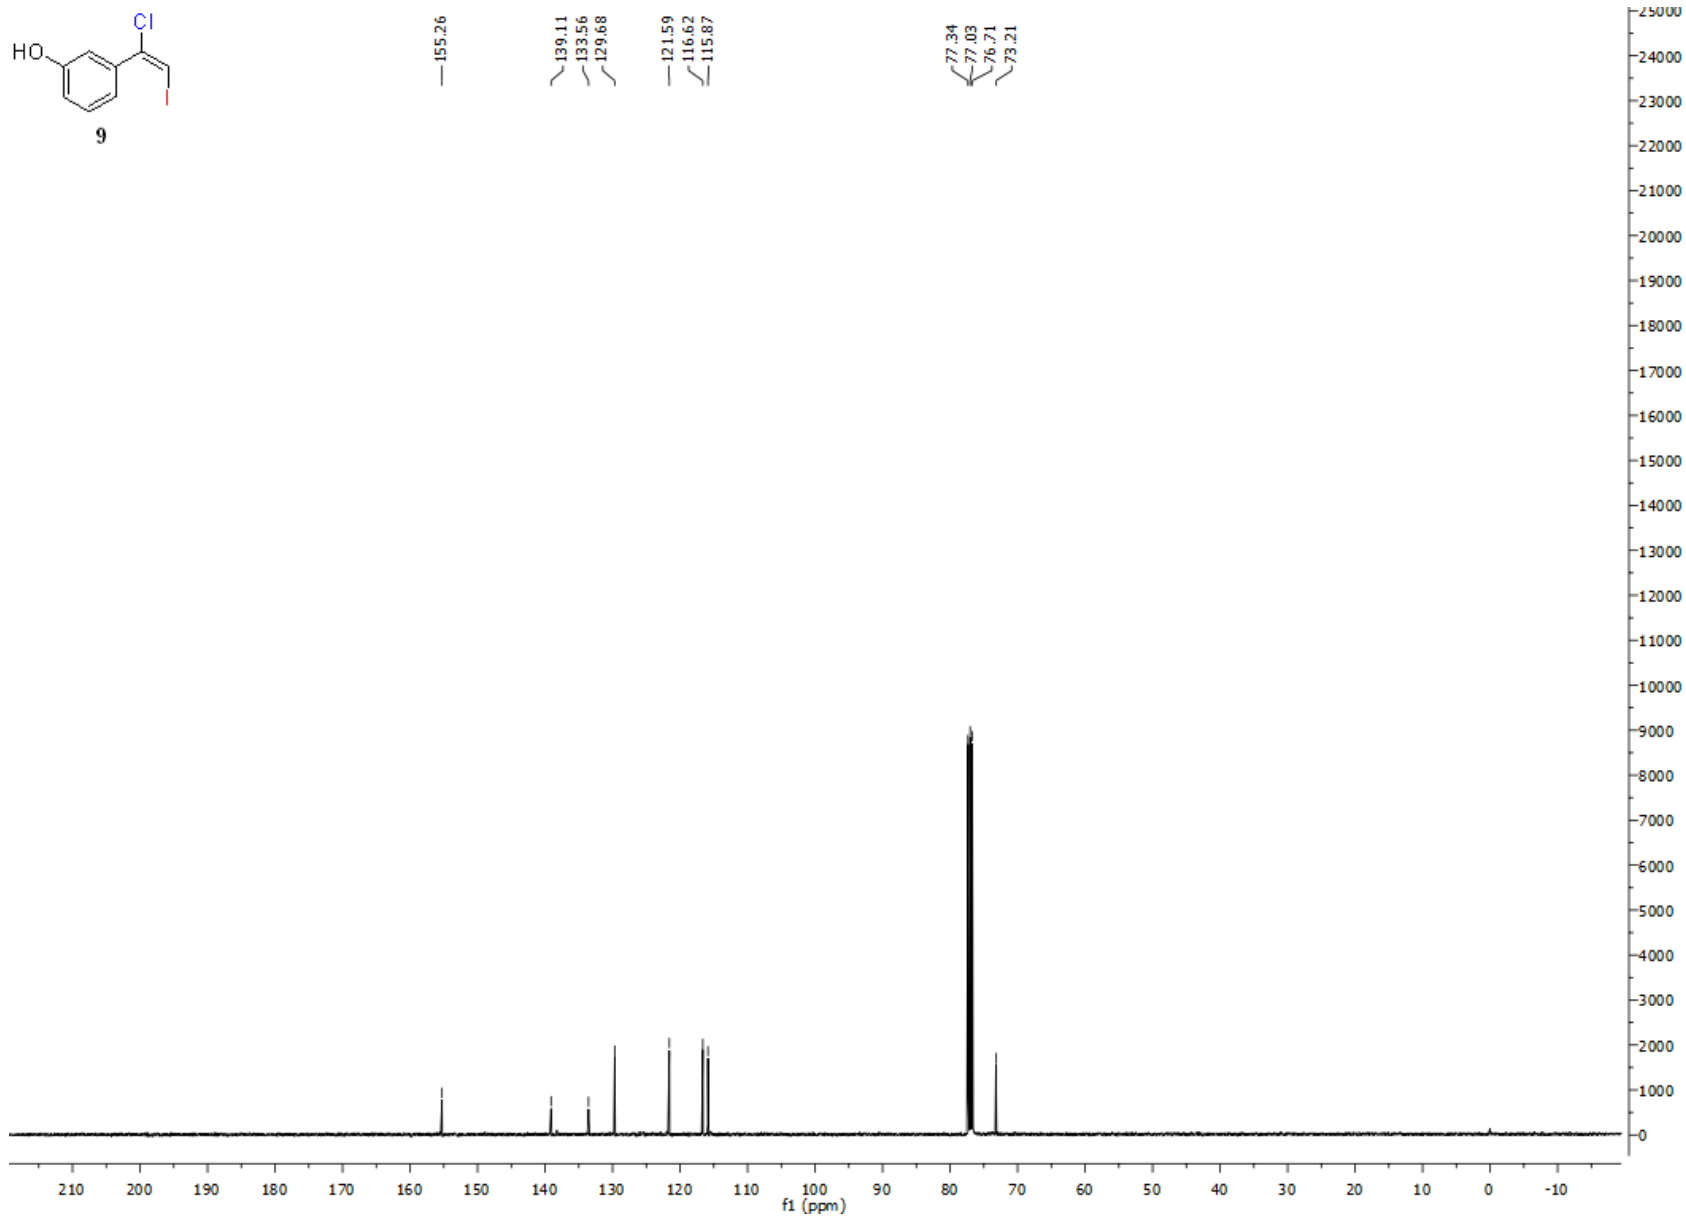

Figure S36. <sup>1</sup>H-NMR of 10

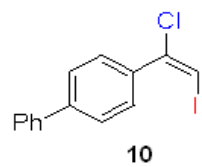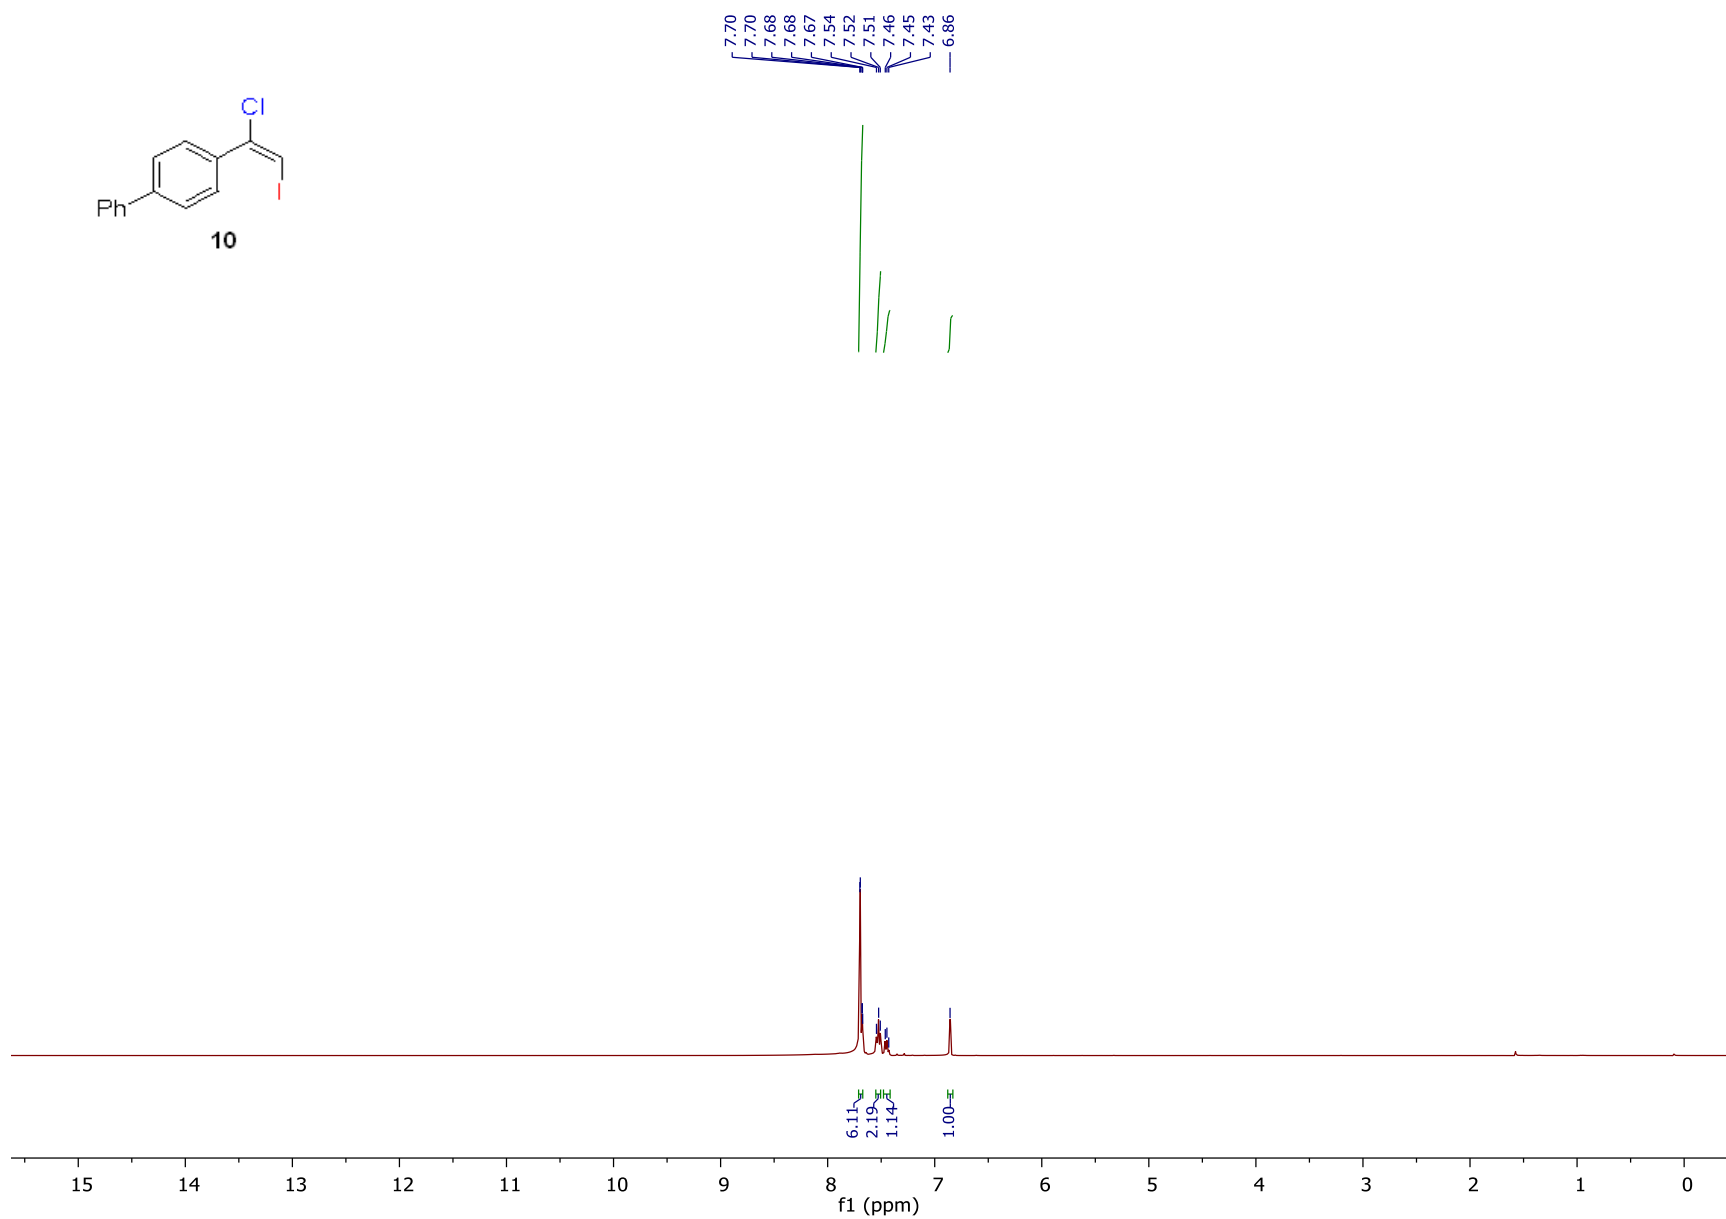

Figure S37.  $^{13}\text{C}$ -NMR of **10**

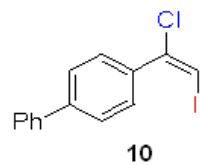

142.34  
140.22  
136.42  
133.94  
129.60  
128.97  
127.90  
127.25  
127.14  
127.00

77.48  
77.16 CDCl<sub>3</sub>  
76.84  
73.06

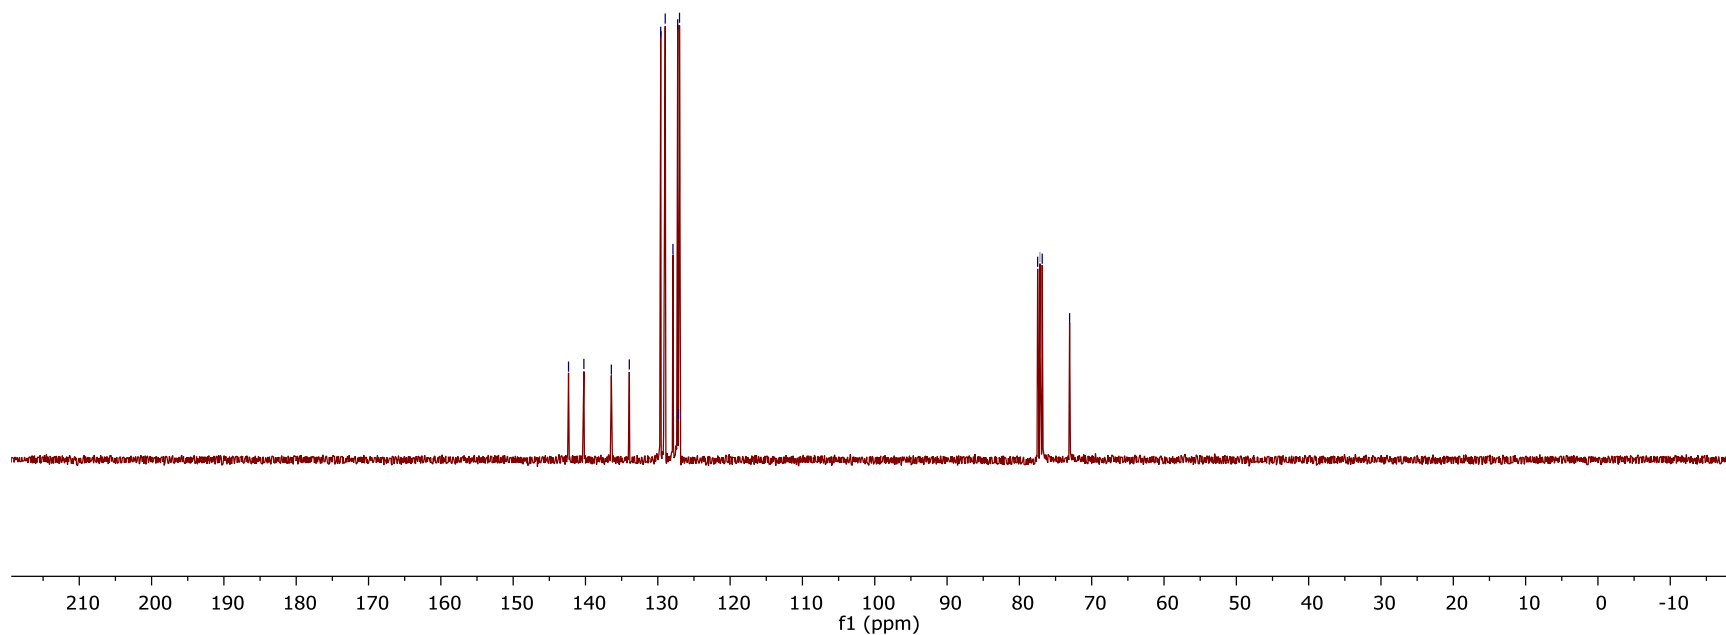

Figure S38. <sup>1</sup>H-NMR of 11

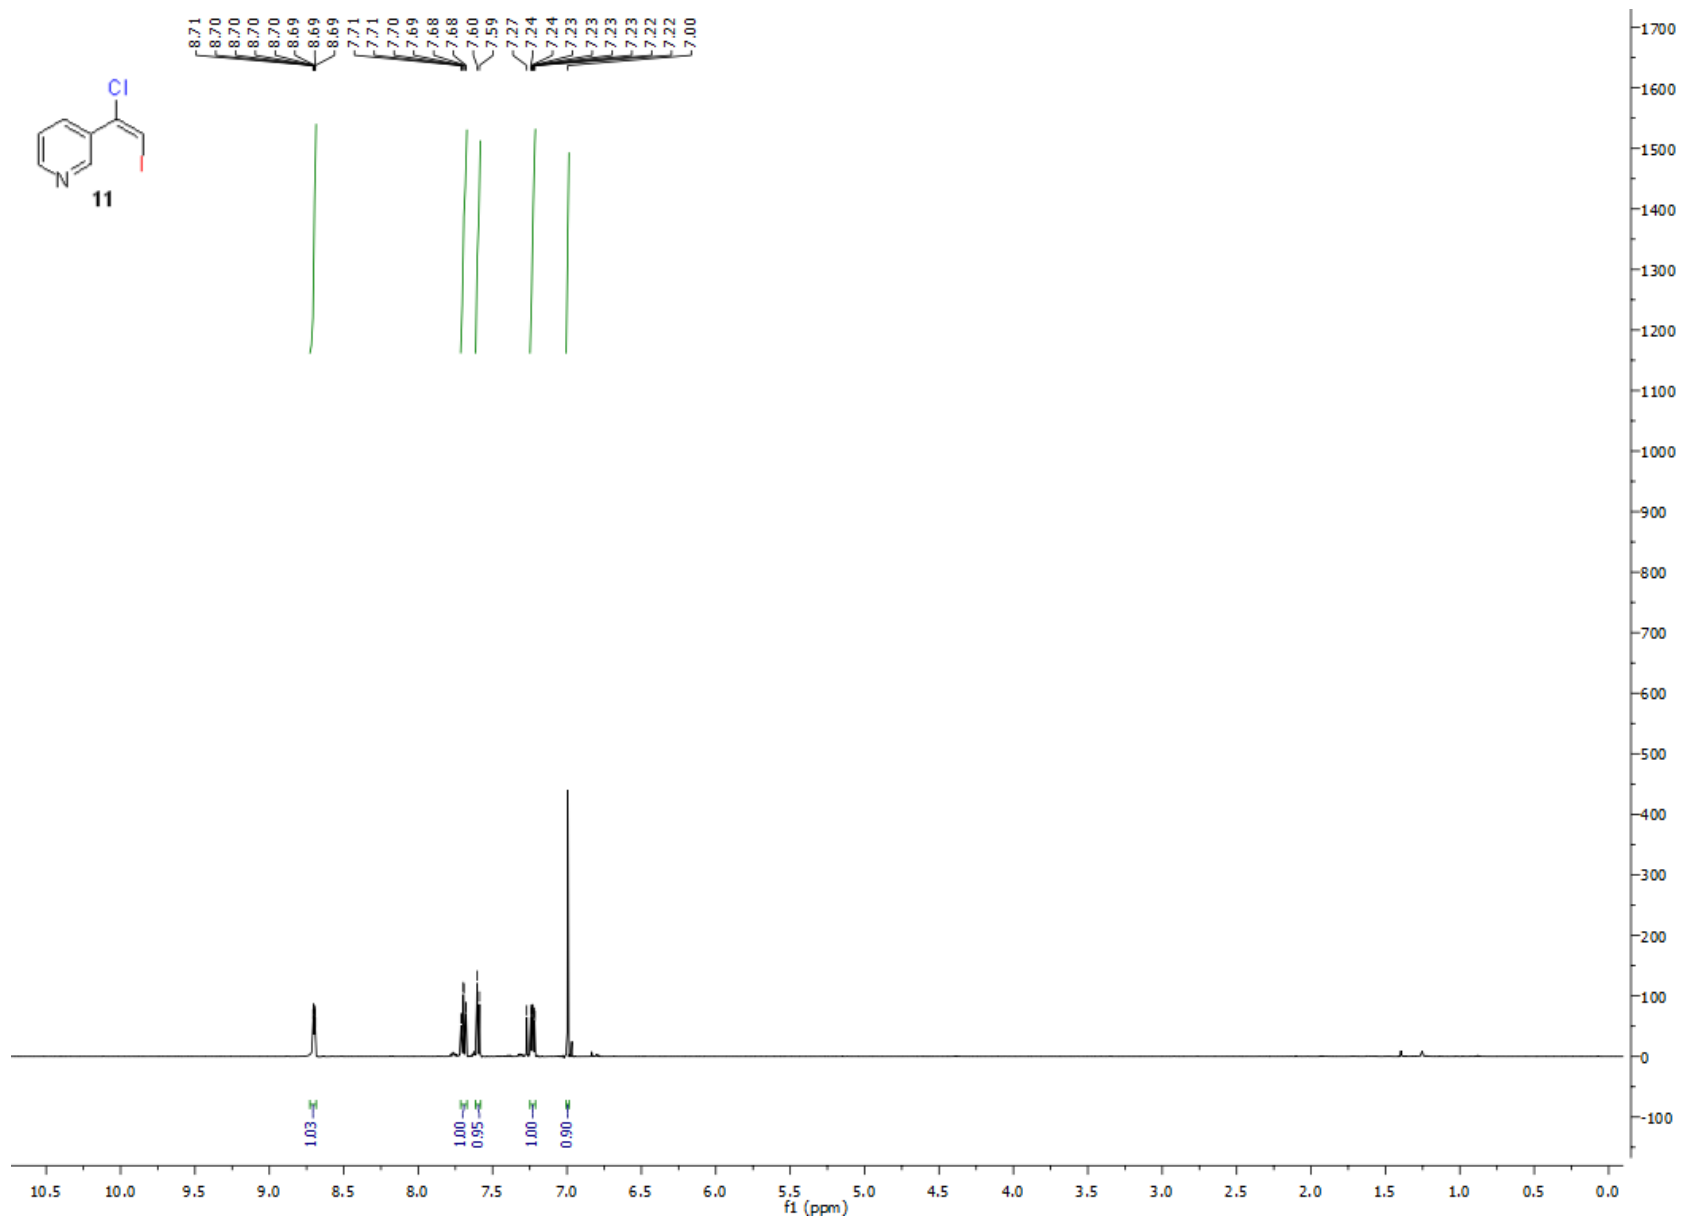

Figure S39. <sup>13</sup>C-NMR of 11

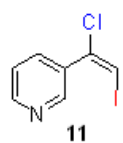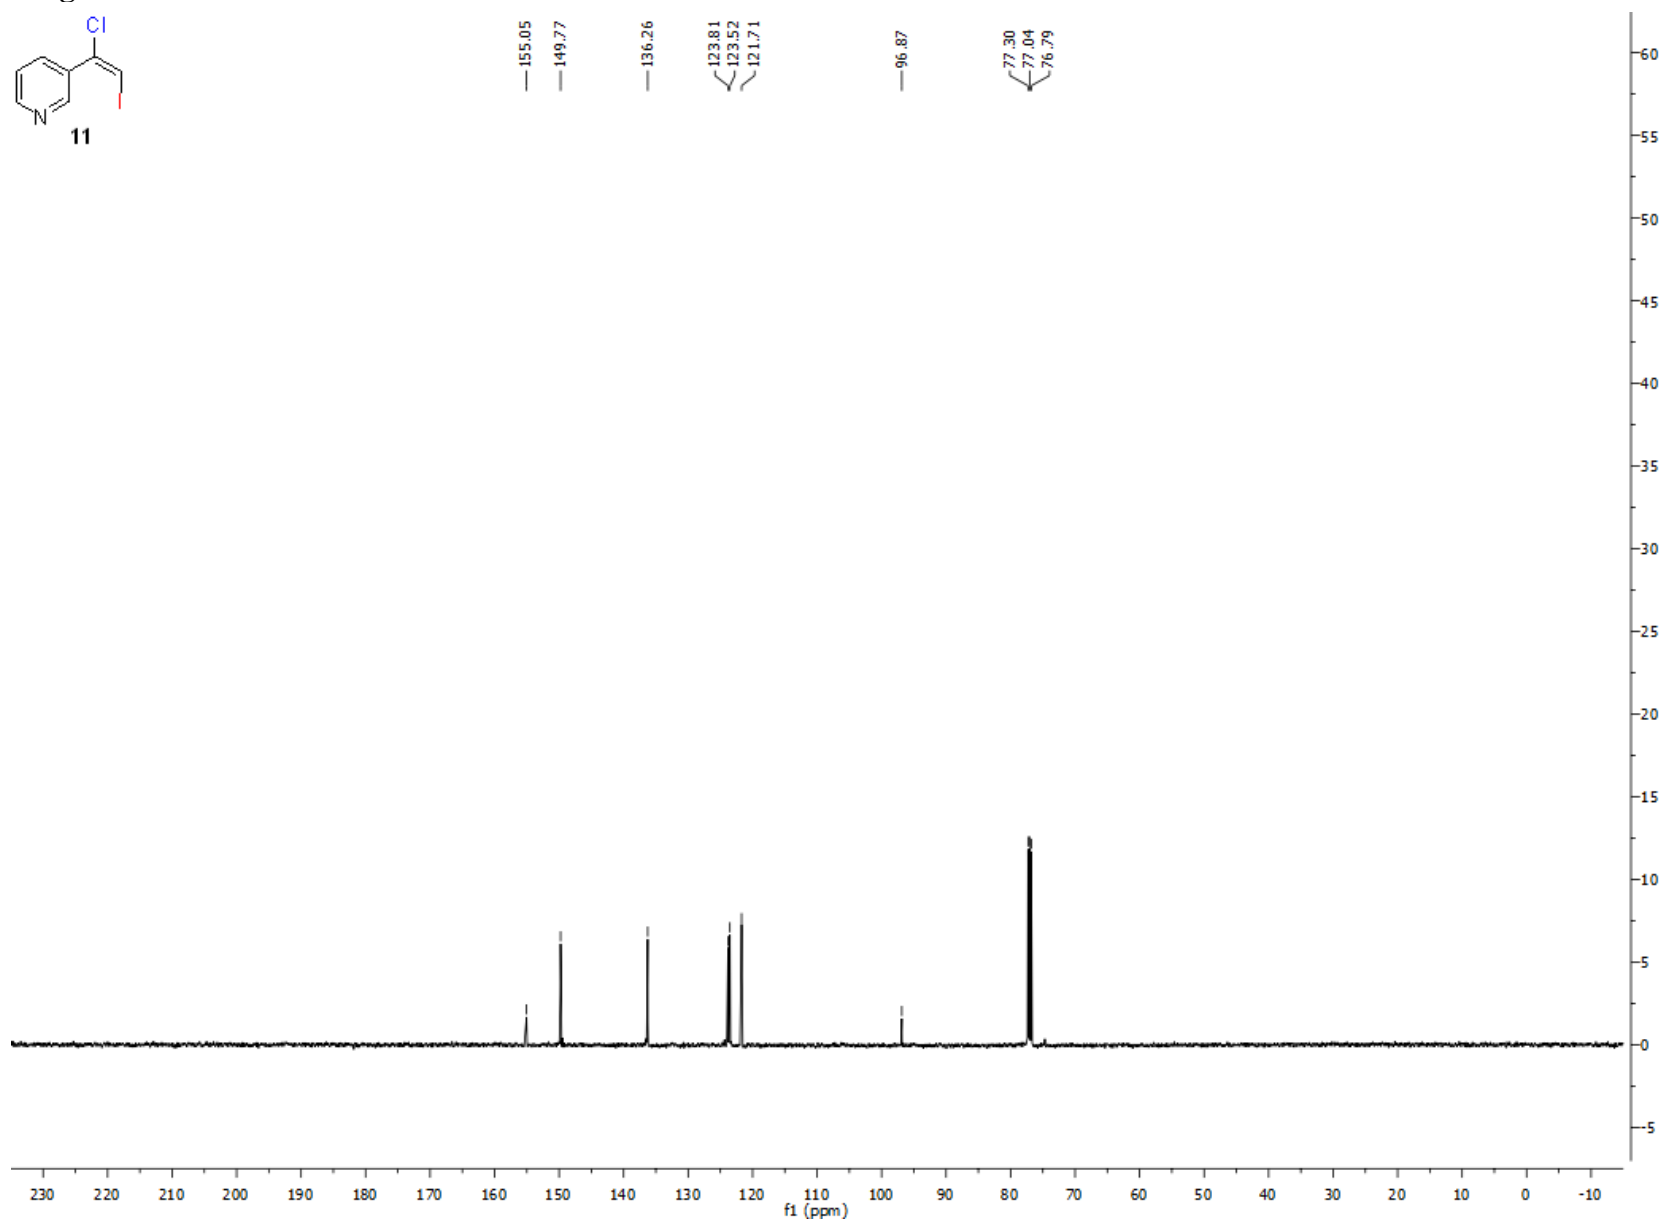

Figure S40. <sup>1</sup>H-NMR of 12

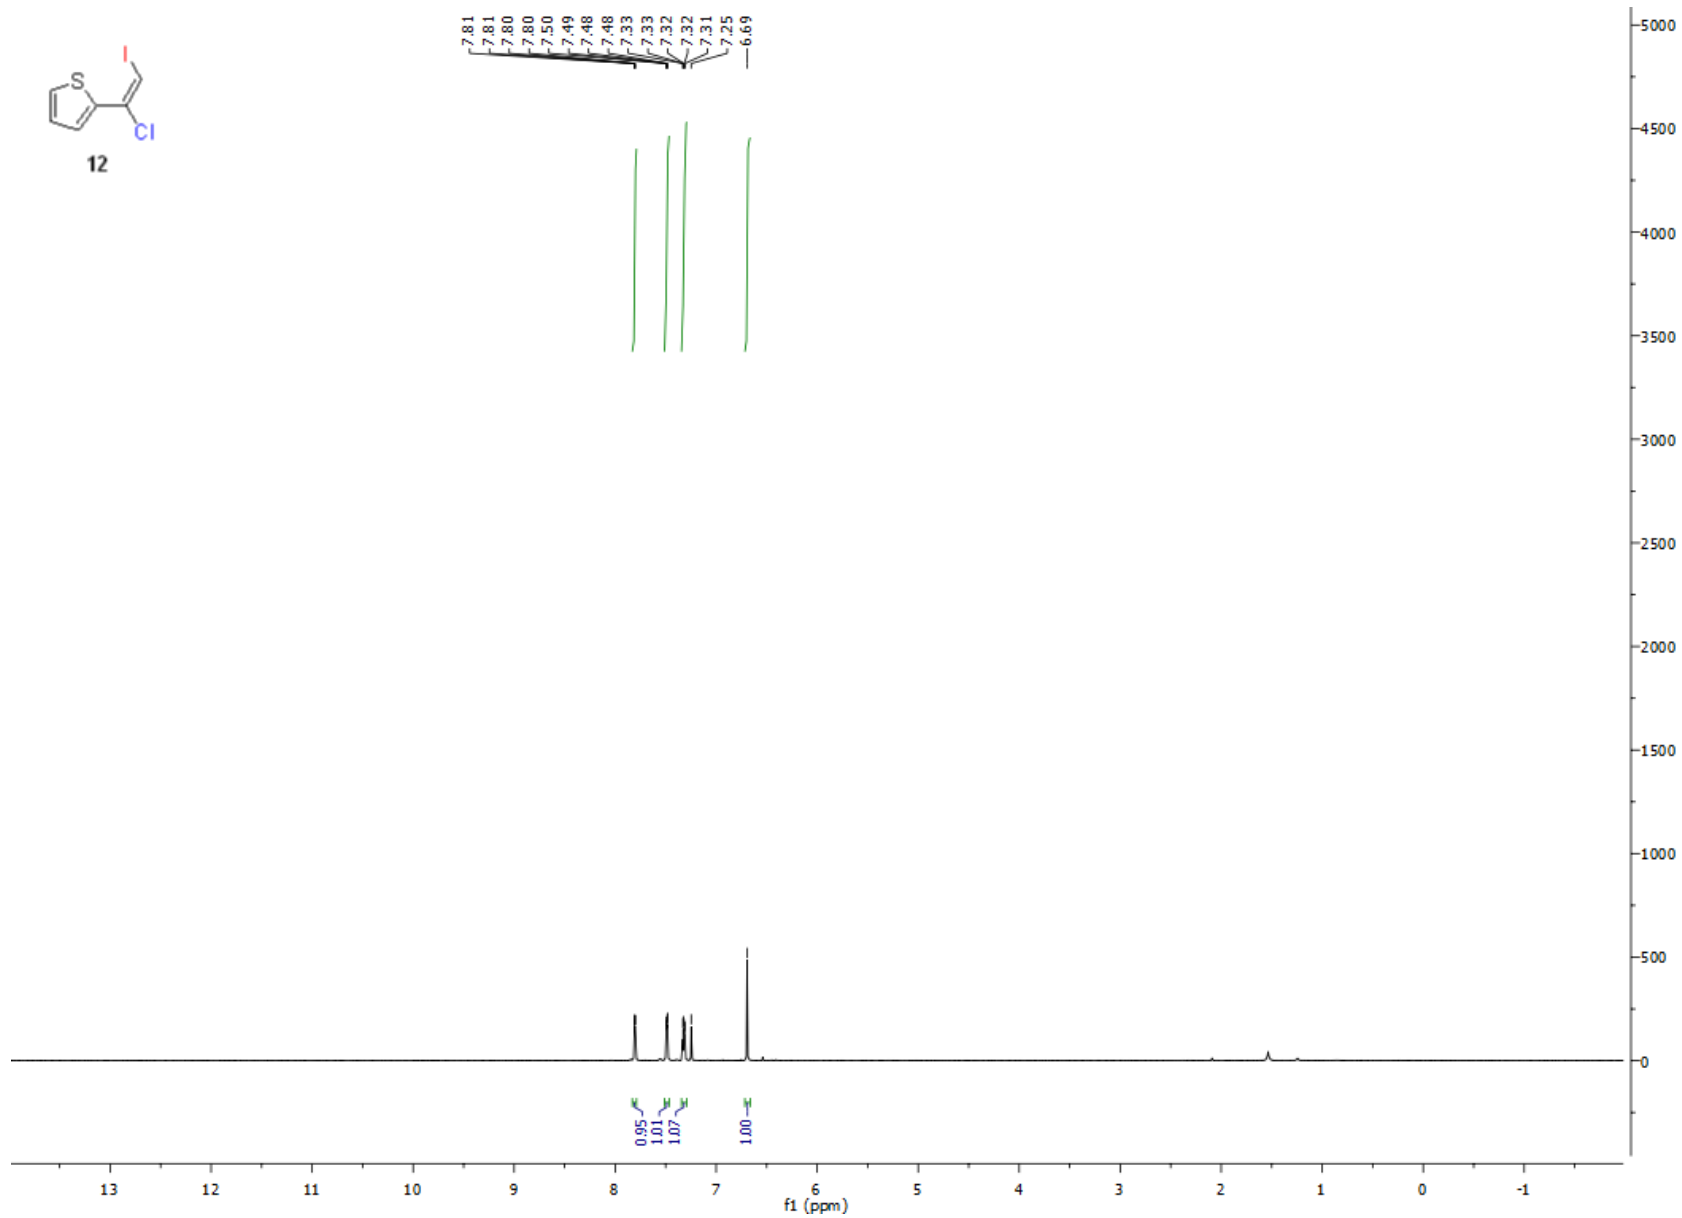

Figure S41.  $^{13}\text{C}$ -NMR of 12

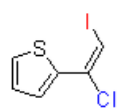

12

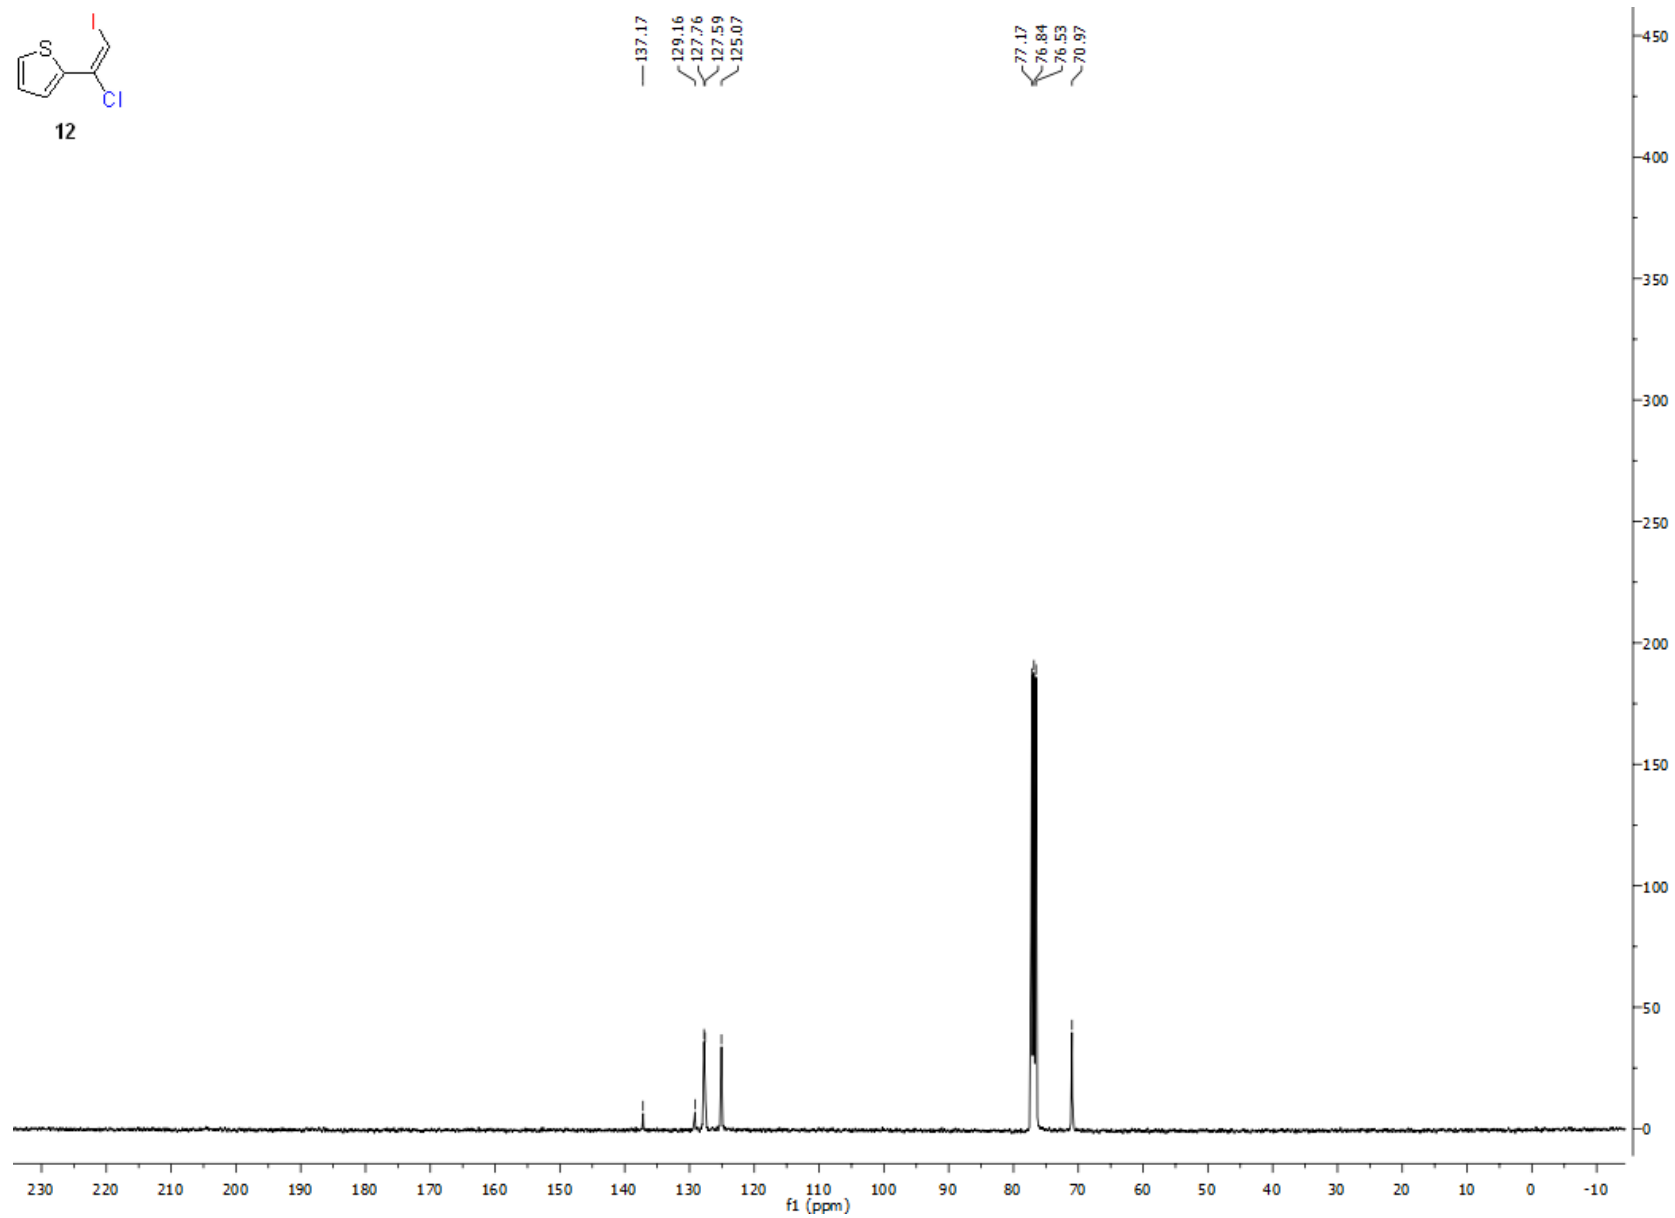

Figure S42. <sup>1</sup>H-NMR of 13

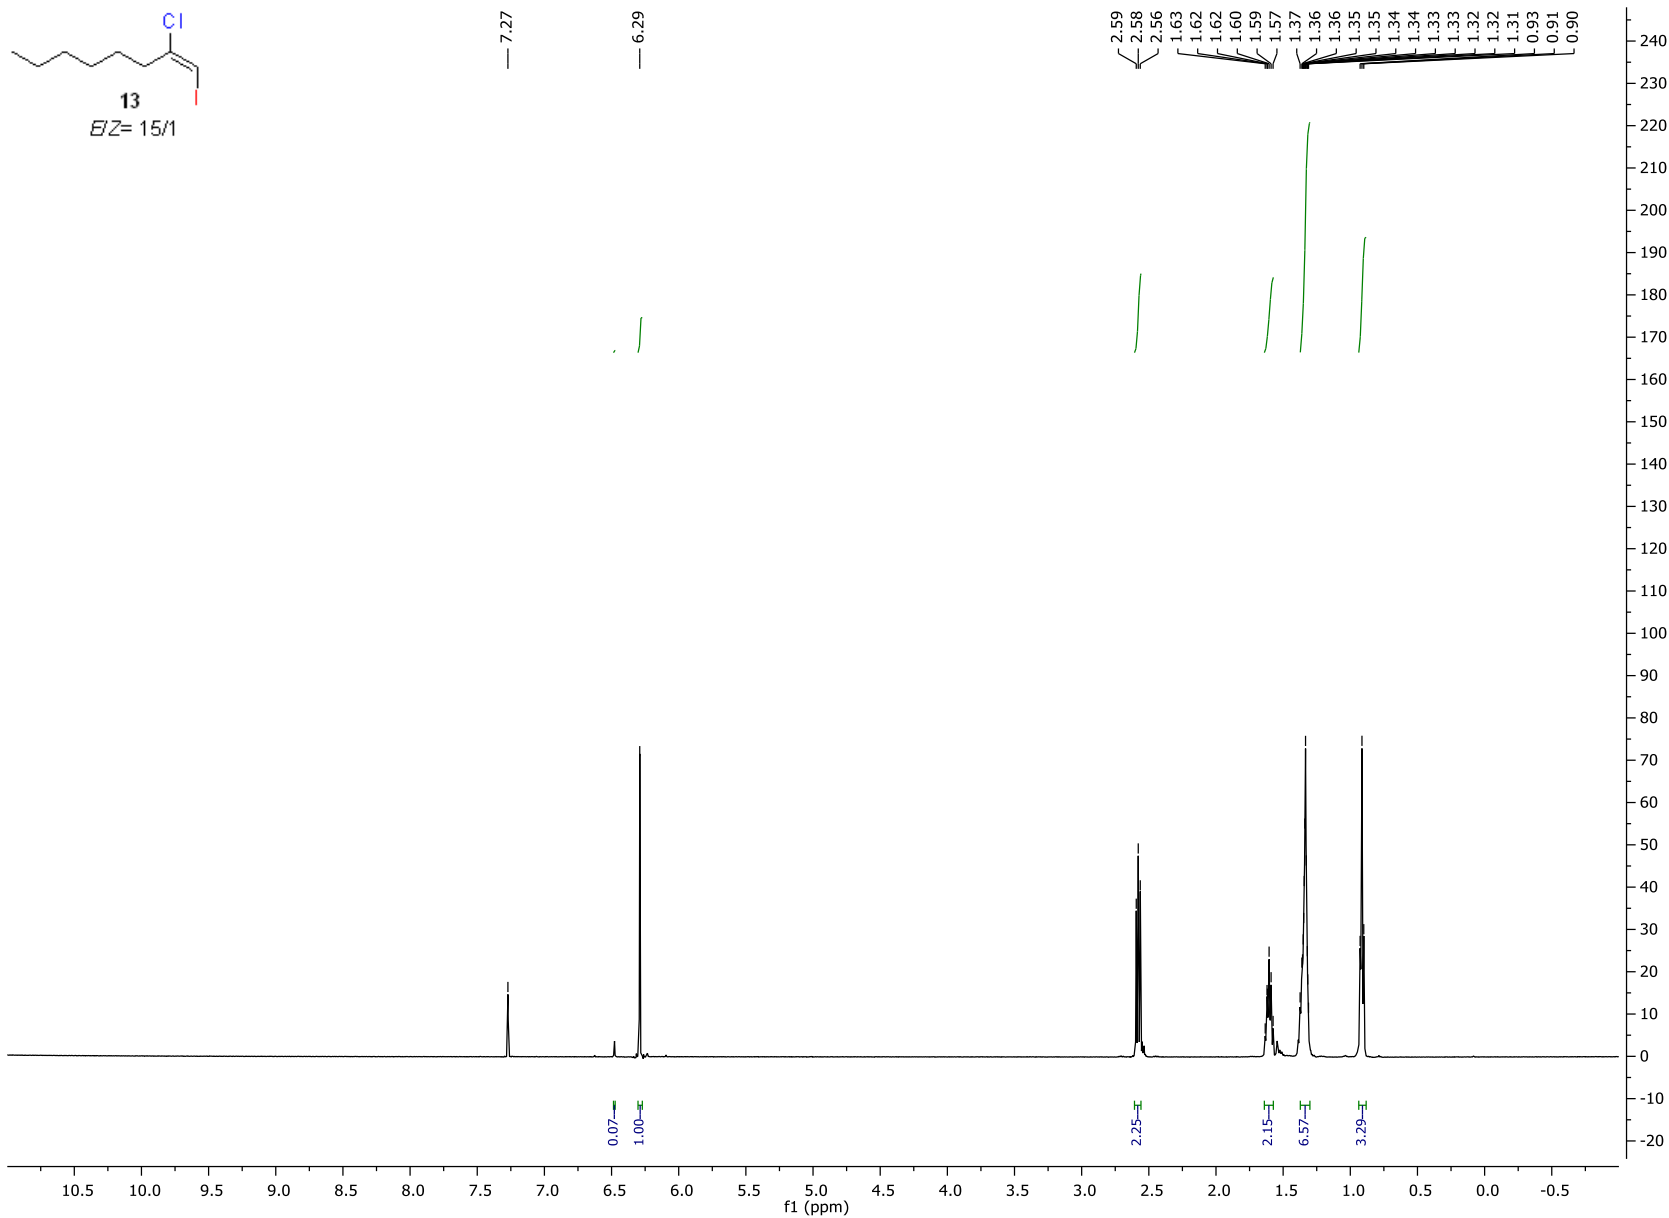



Figure S43.  $^{13}\text{C}$ -NMR of 13

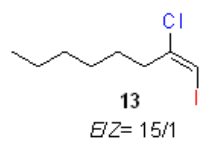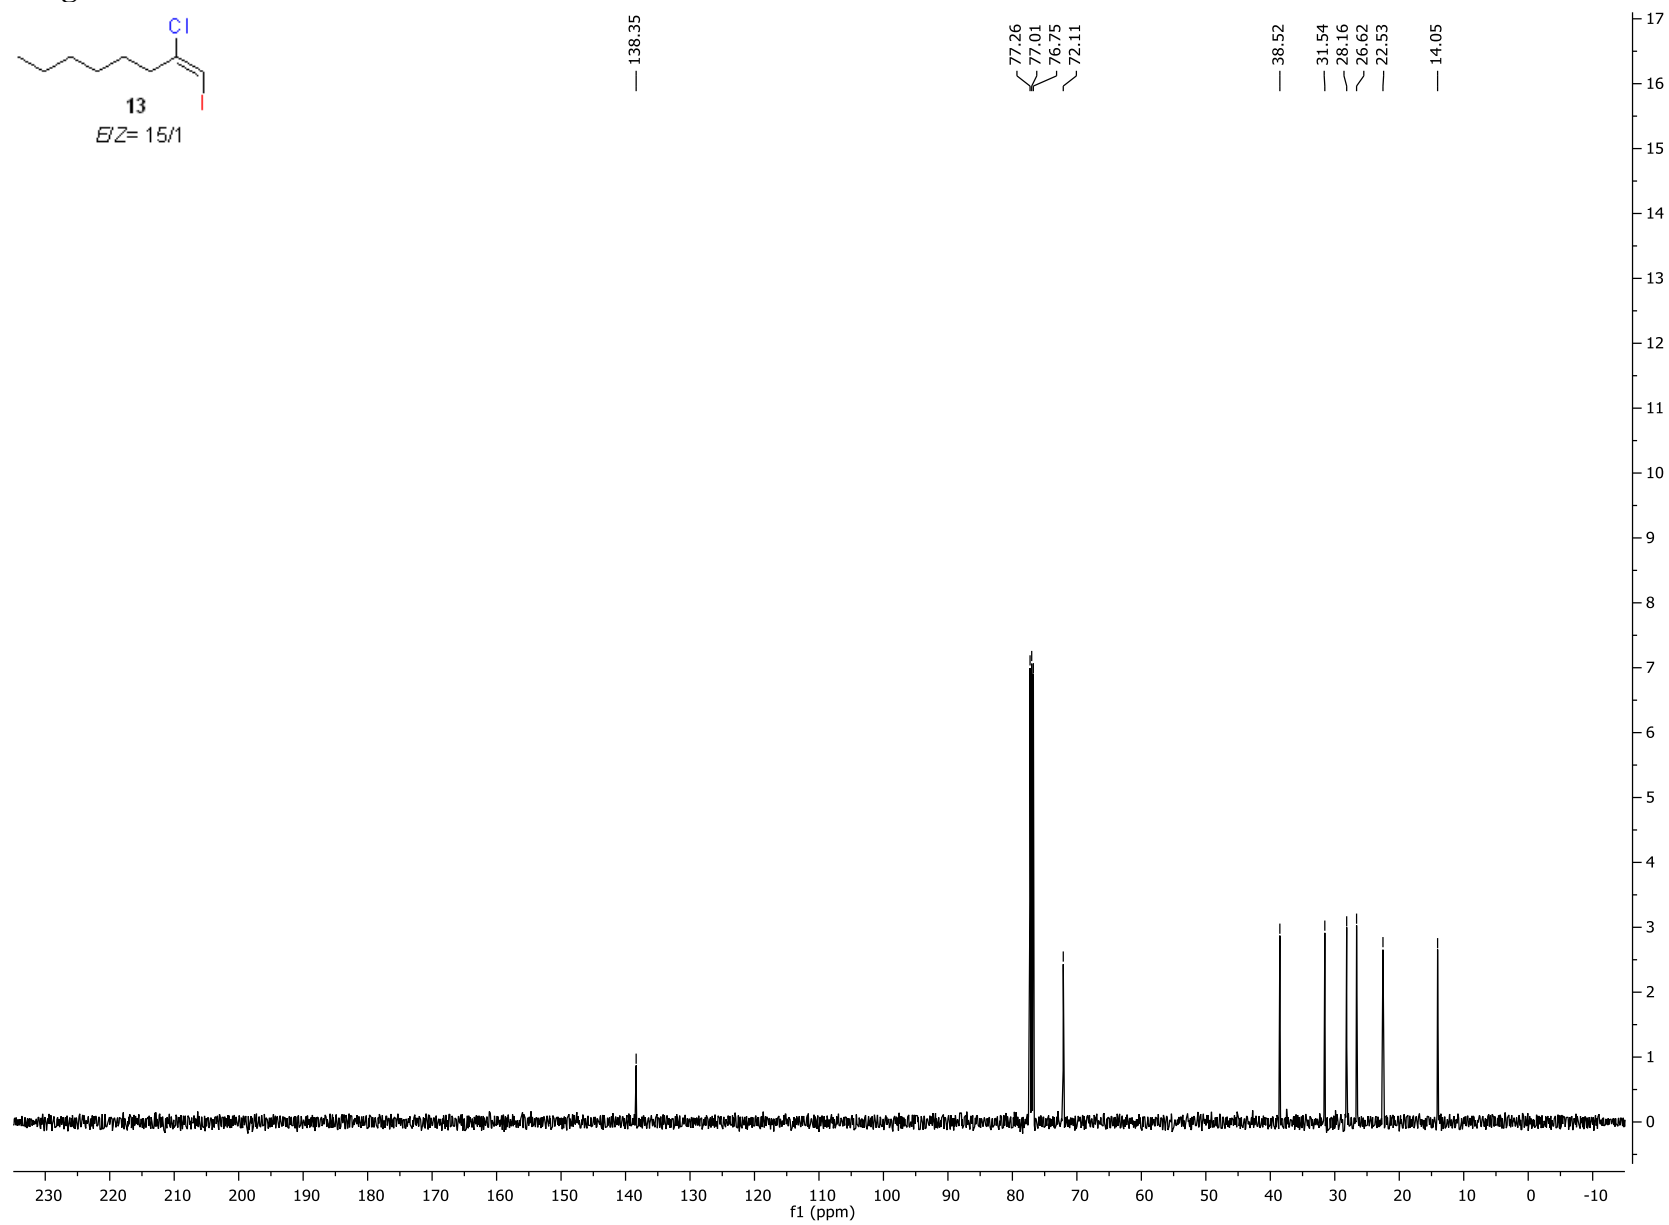

Figure S44. <sup>1</sup>H-NMR of 14

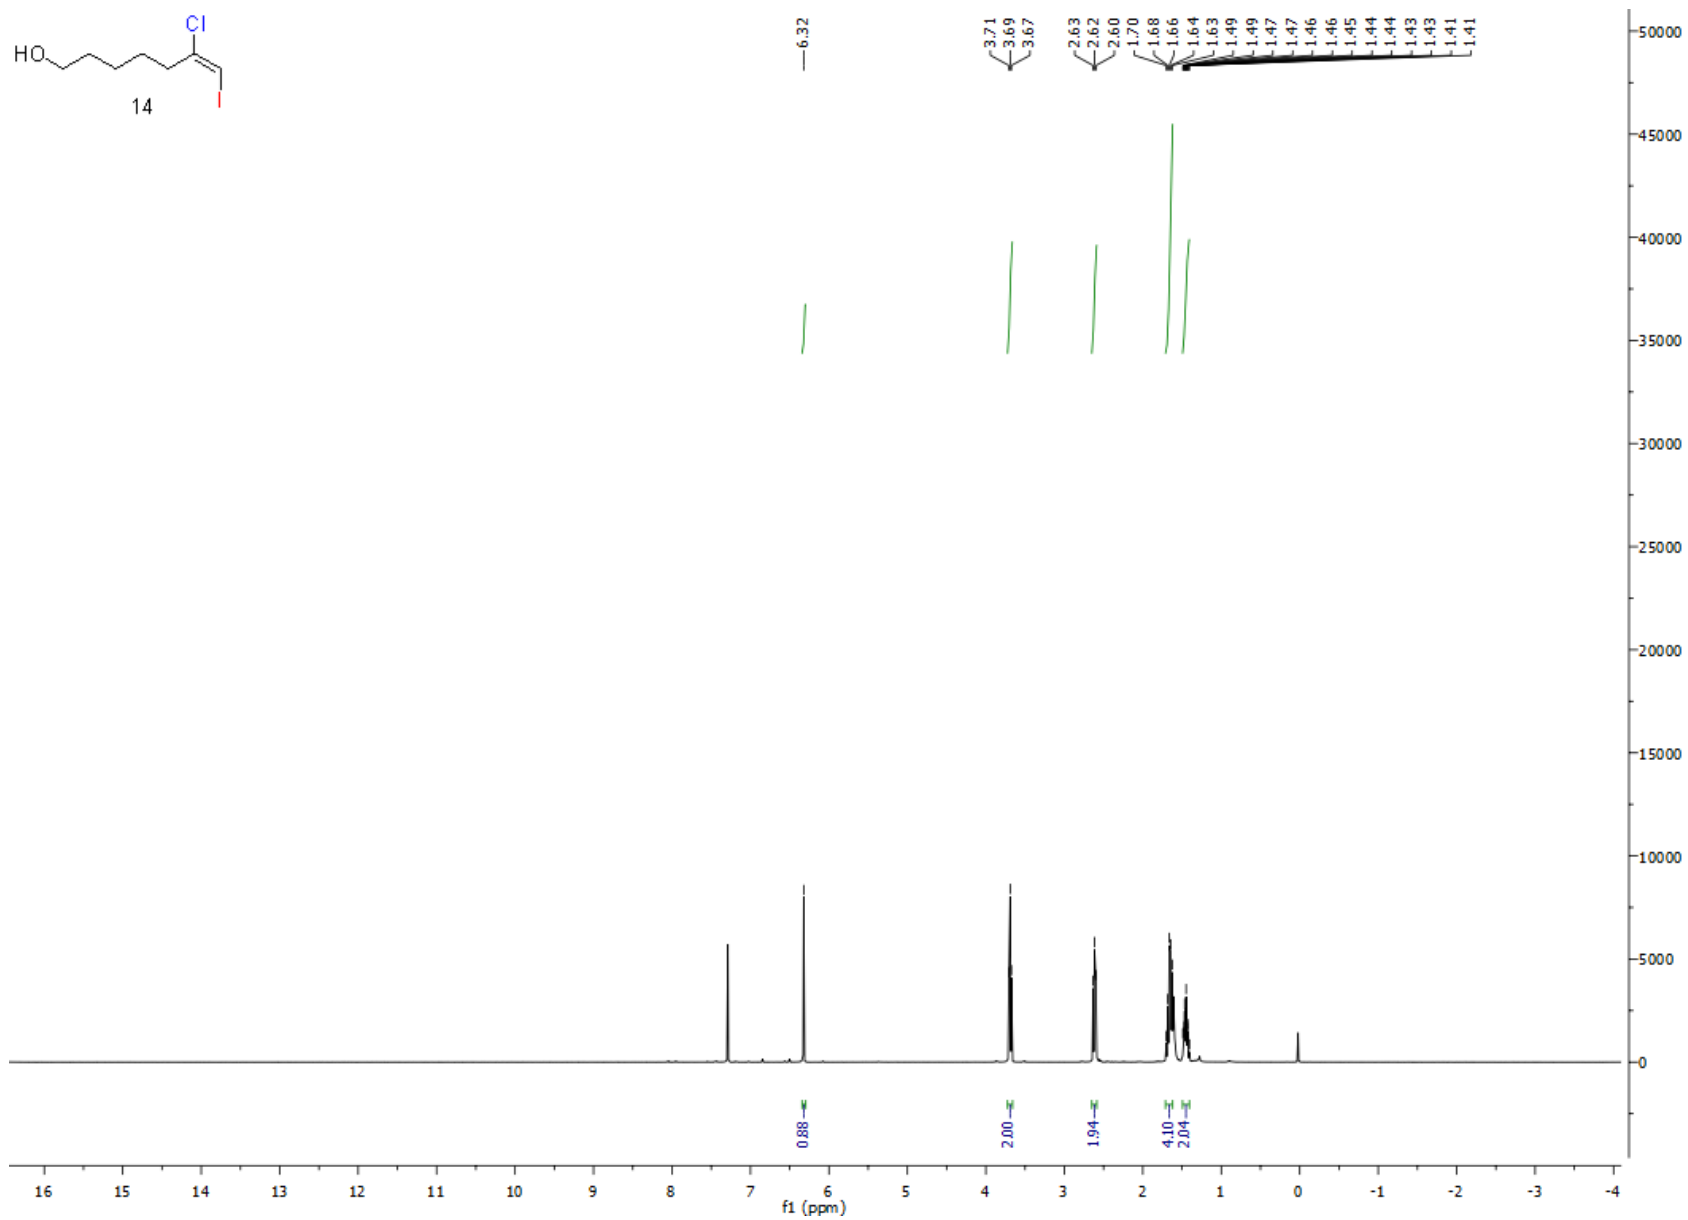

Figure S45.  $^{13}\text{C}$ -NMR of 14

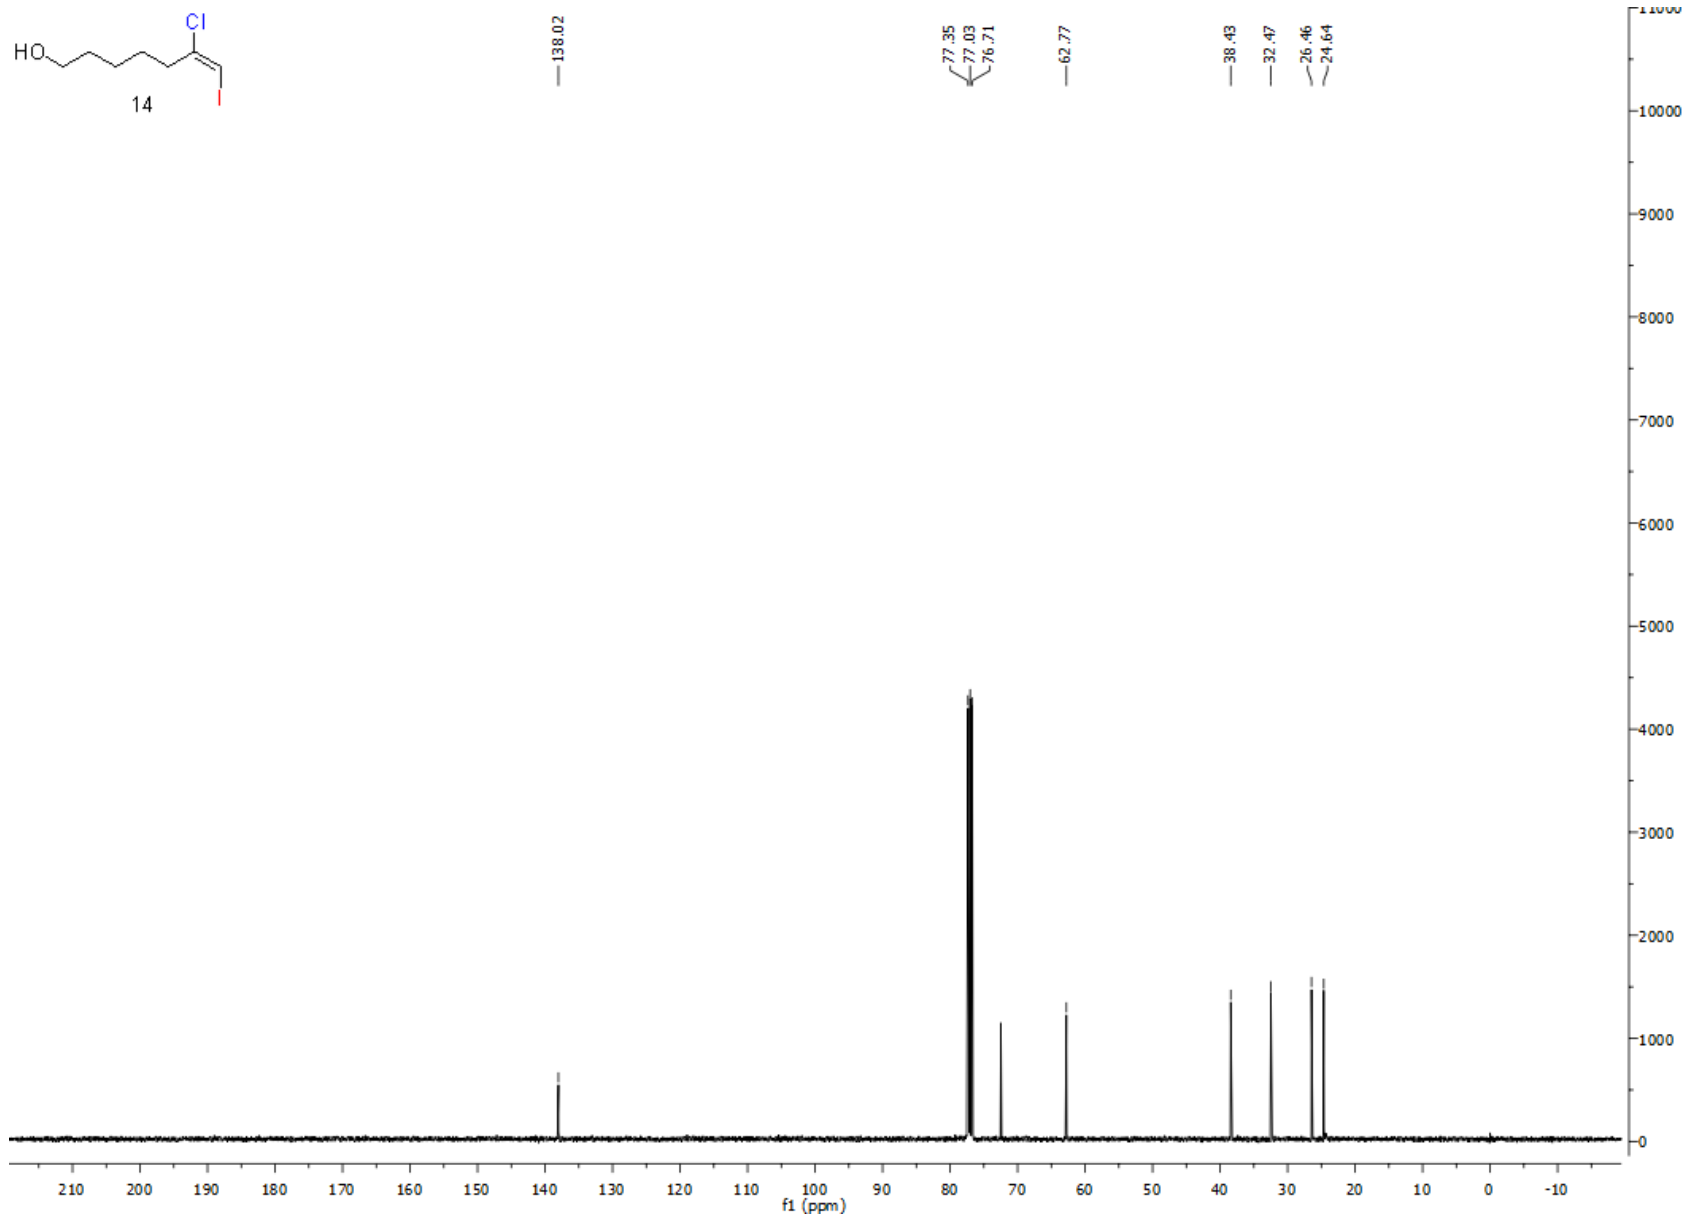

Figure S46. <sup>1</sup>H-NMR of 15

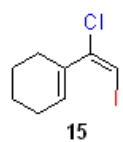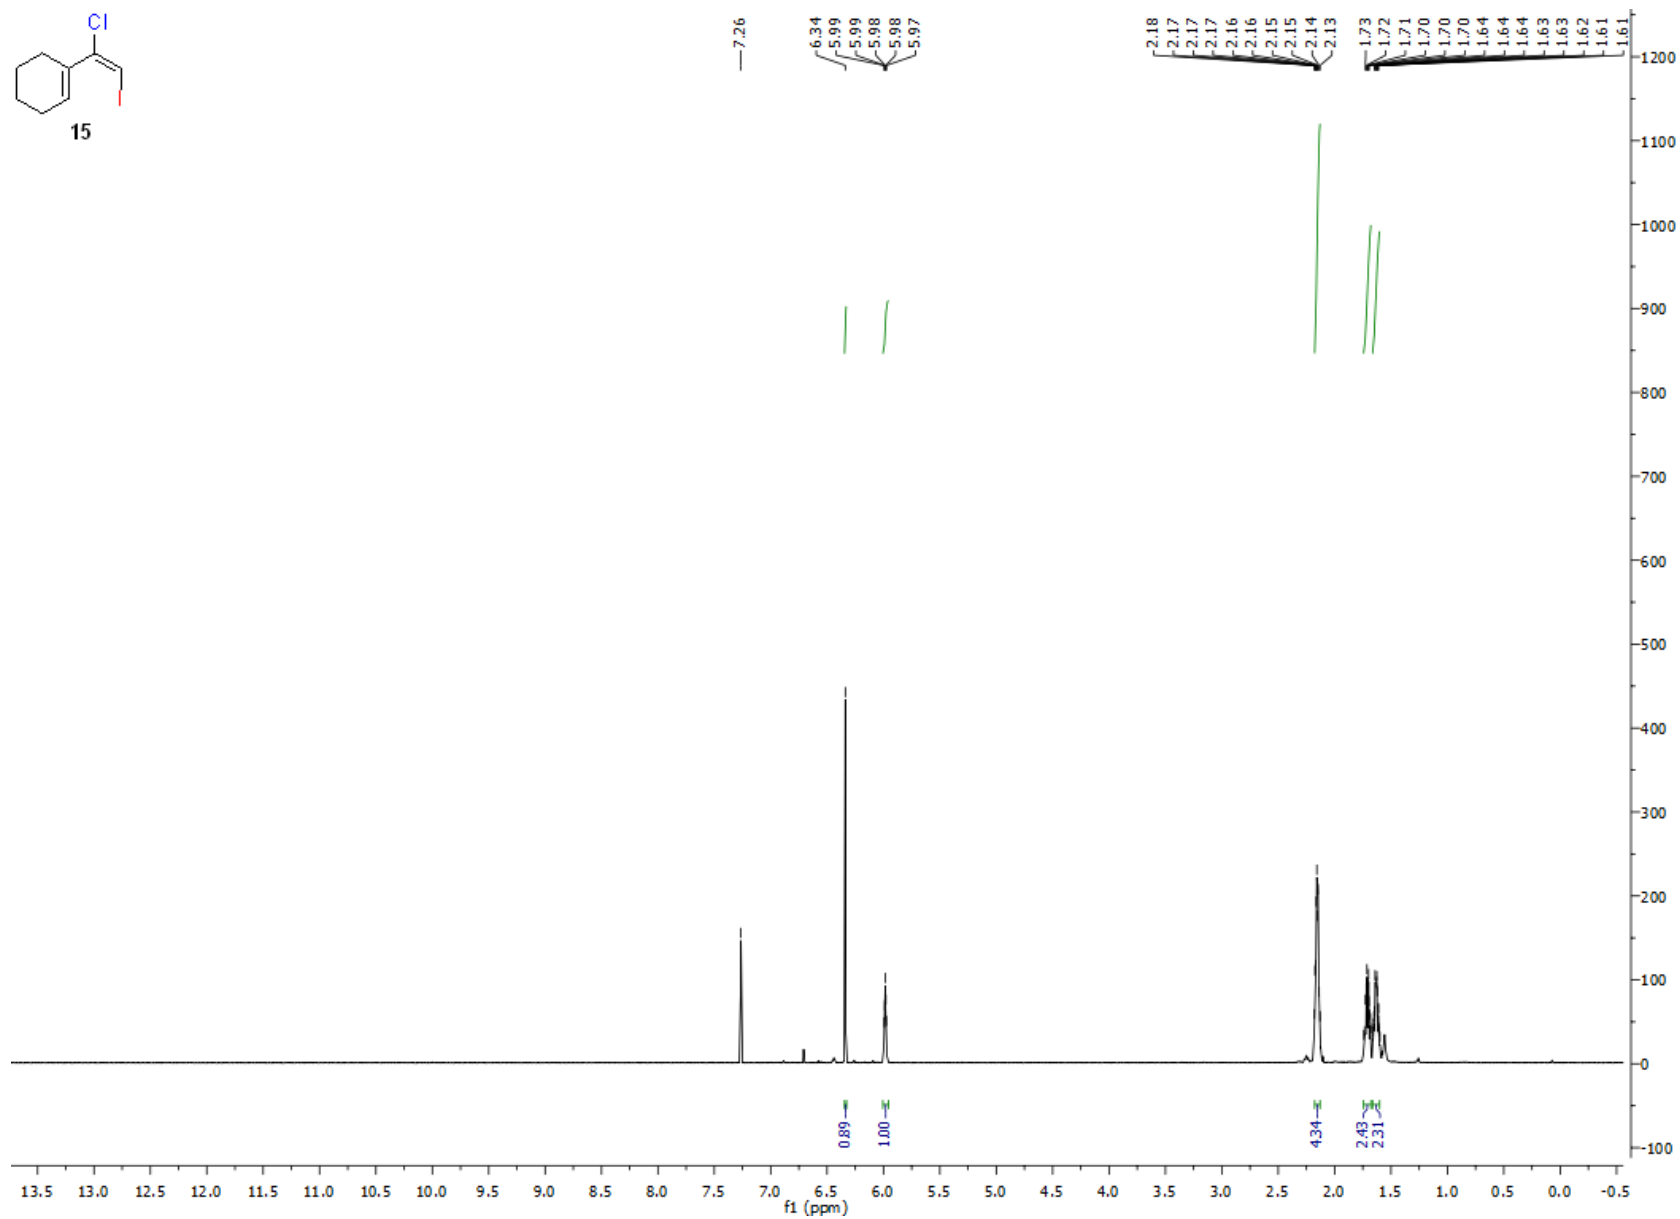

Figure S47.  $^{13}\text{C}$ -NMR of 15

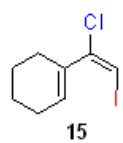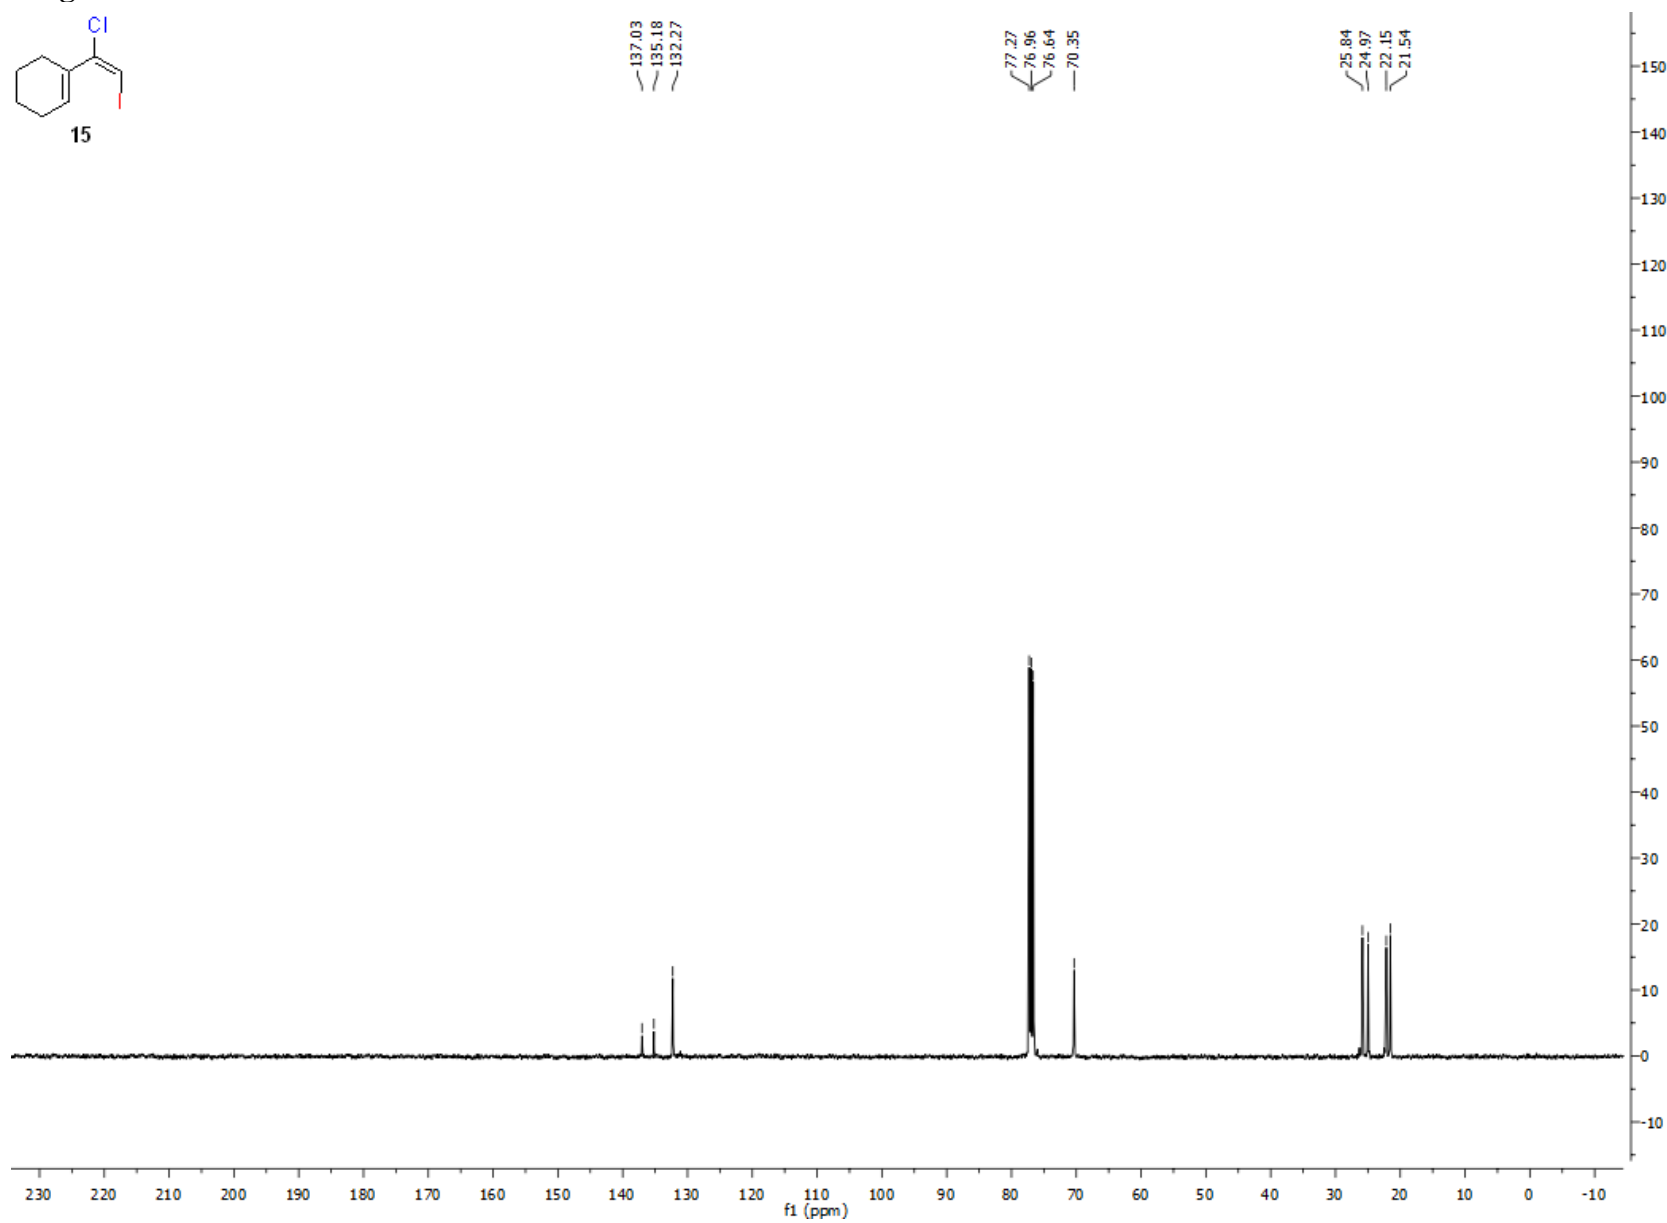

Figure S48. <sup>1</sup>H-NMR of 16

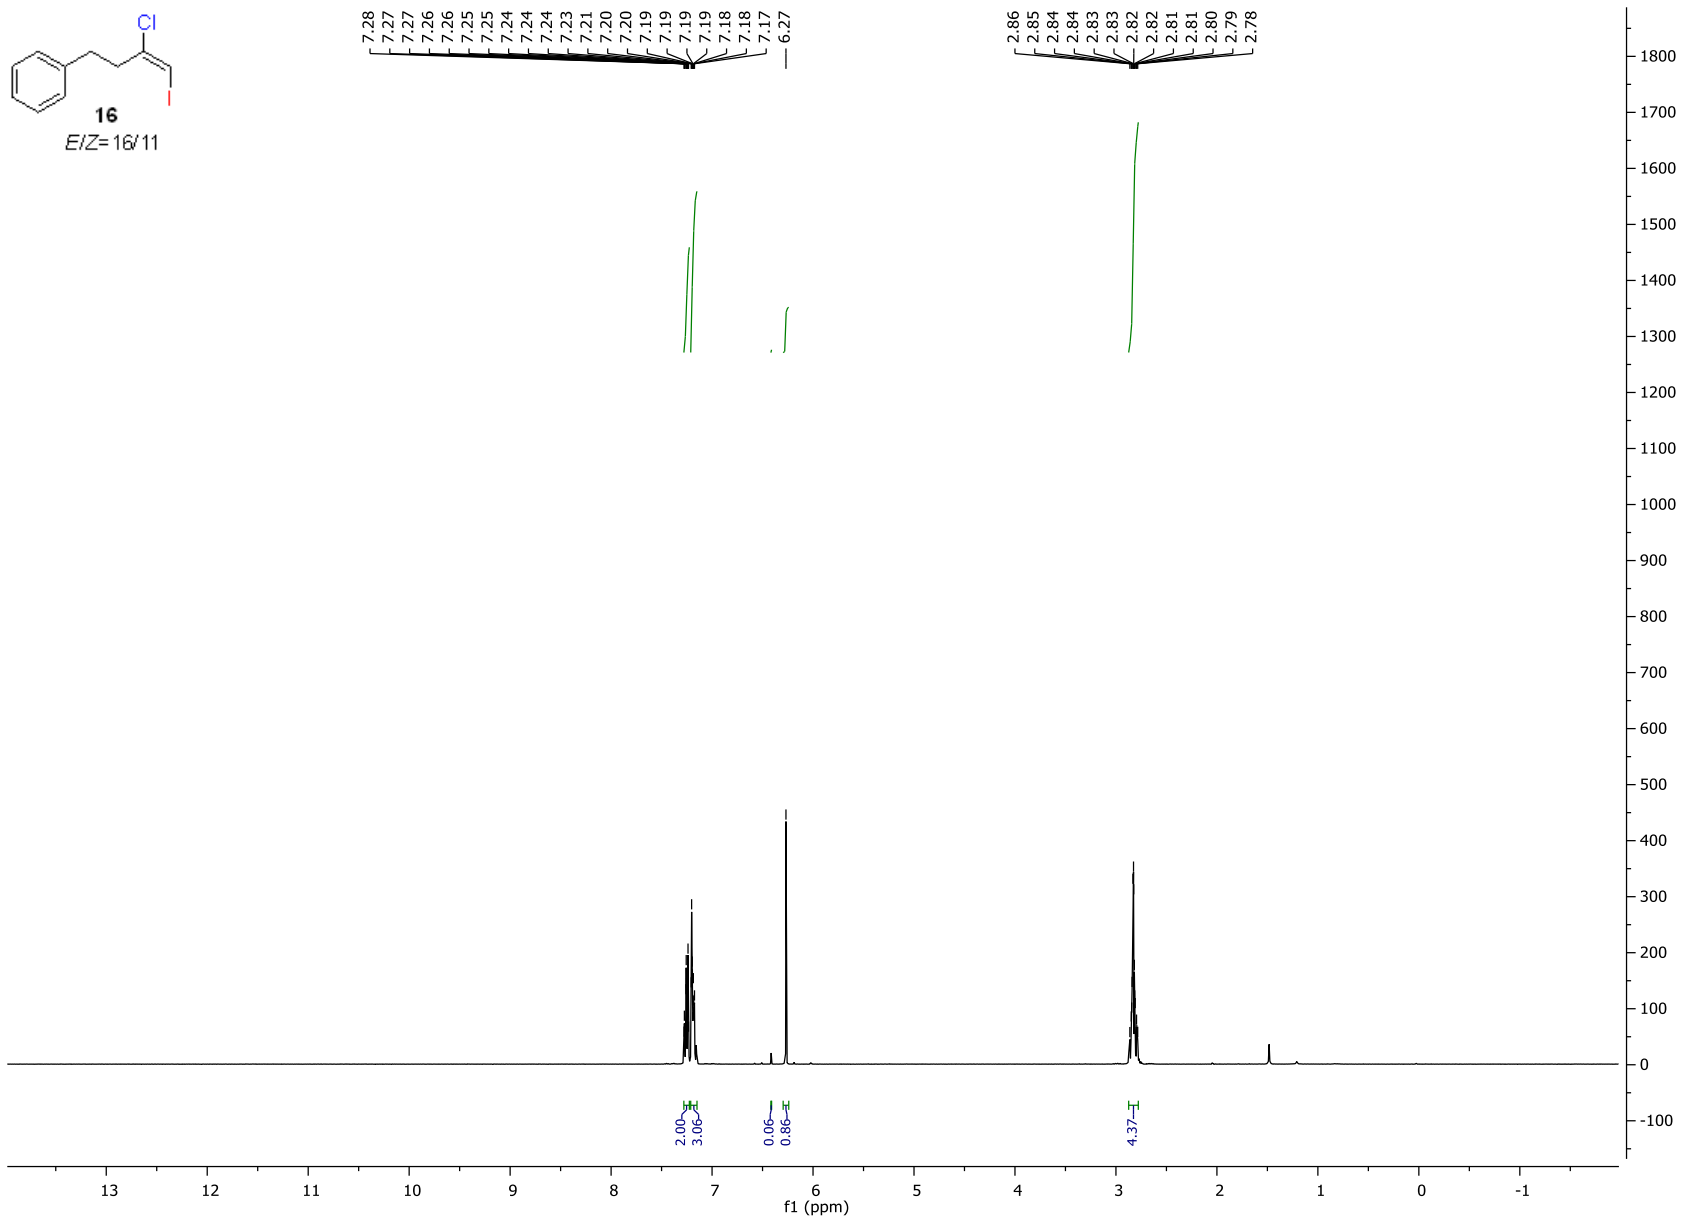

Figure S49.  $^{13}\text{C}$ -NMR of 16

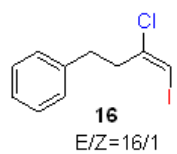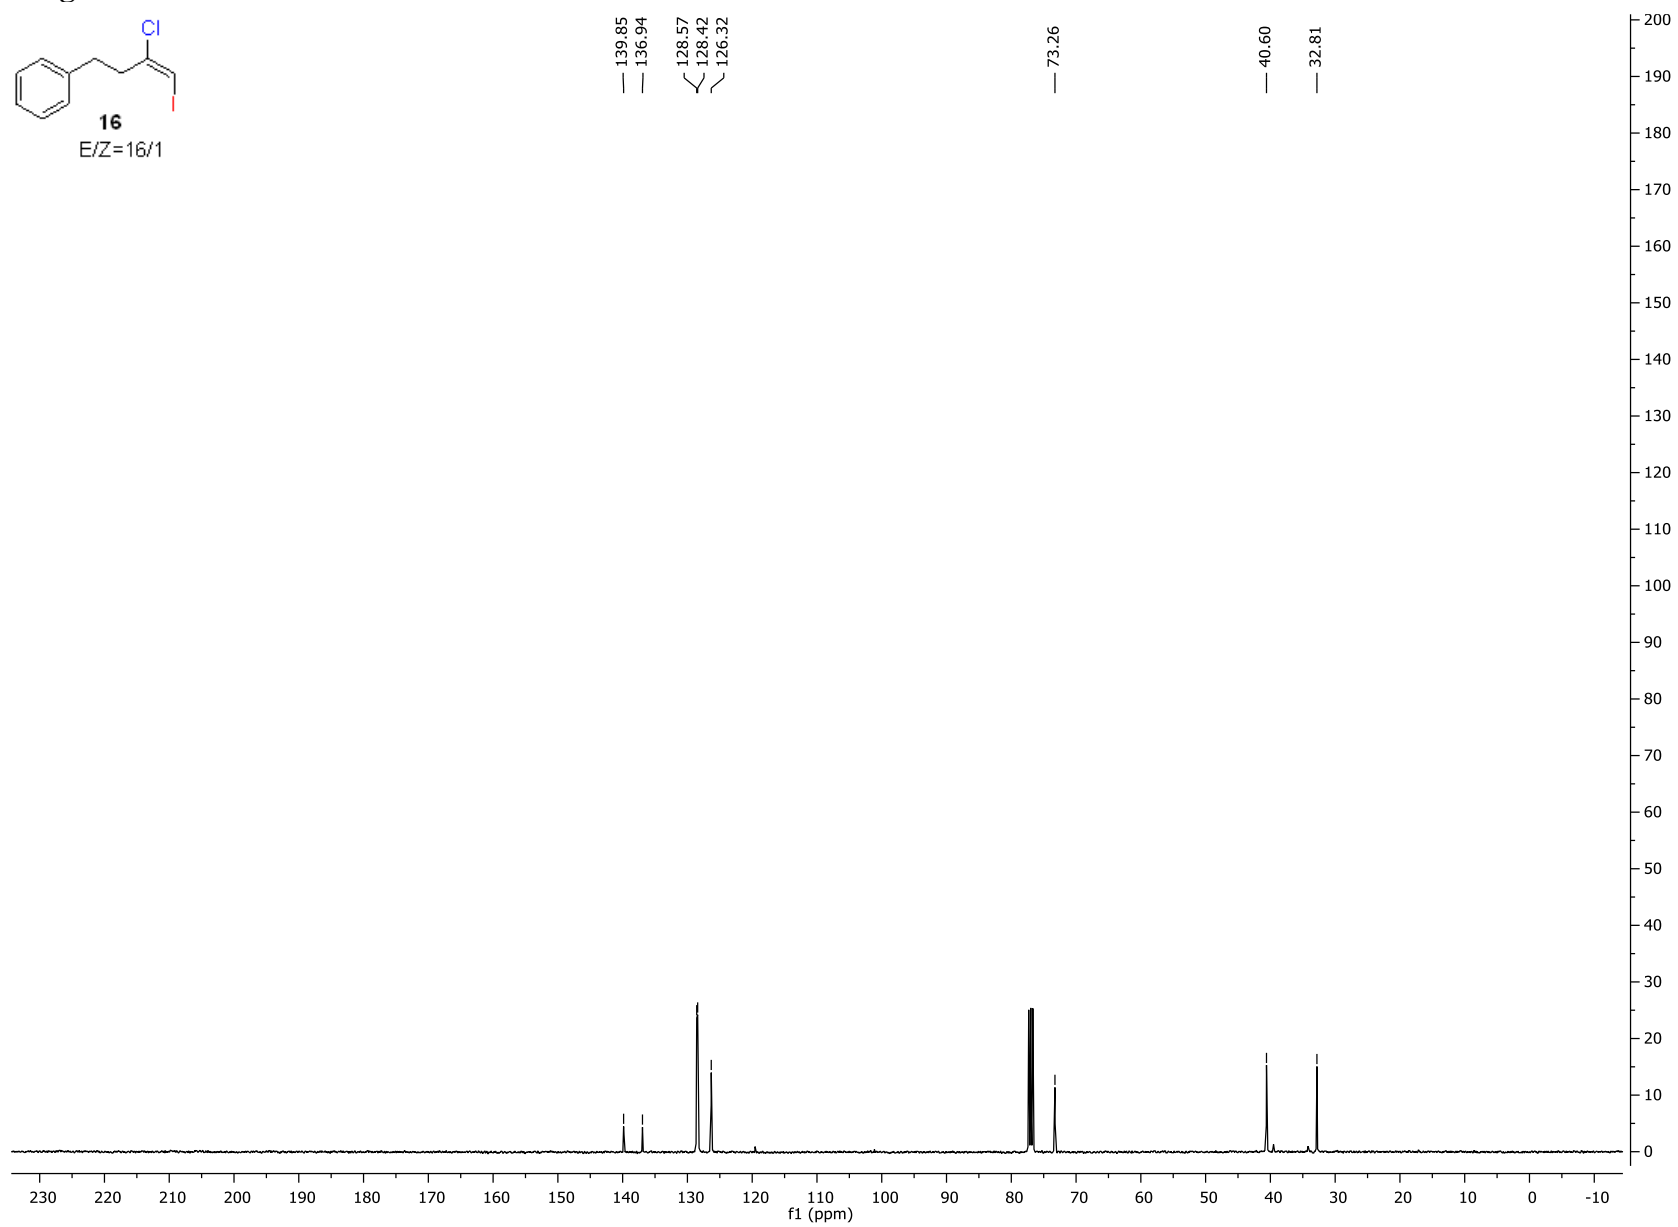

Figure S50. <sup>1</sup>H-NMR of 17

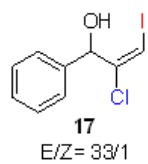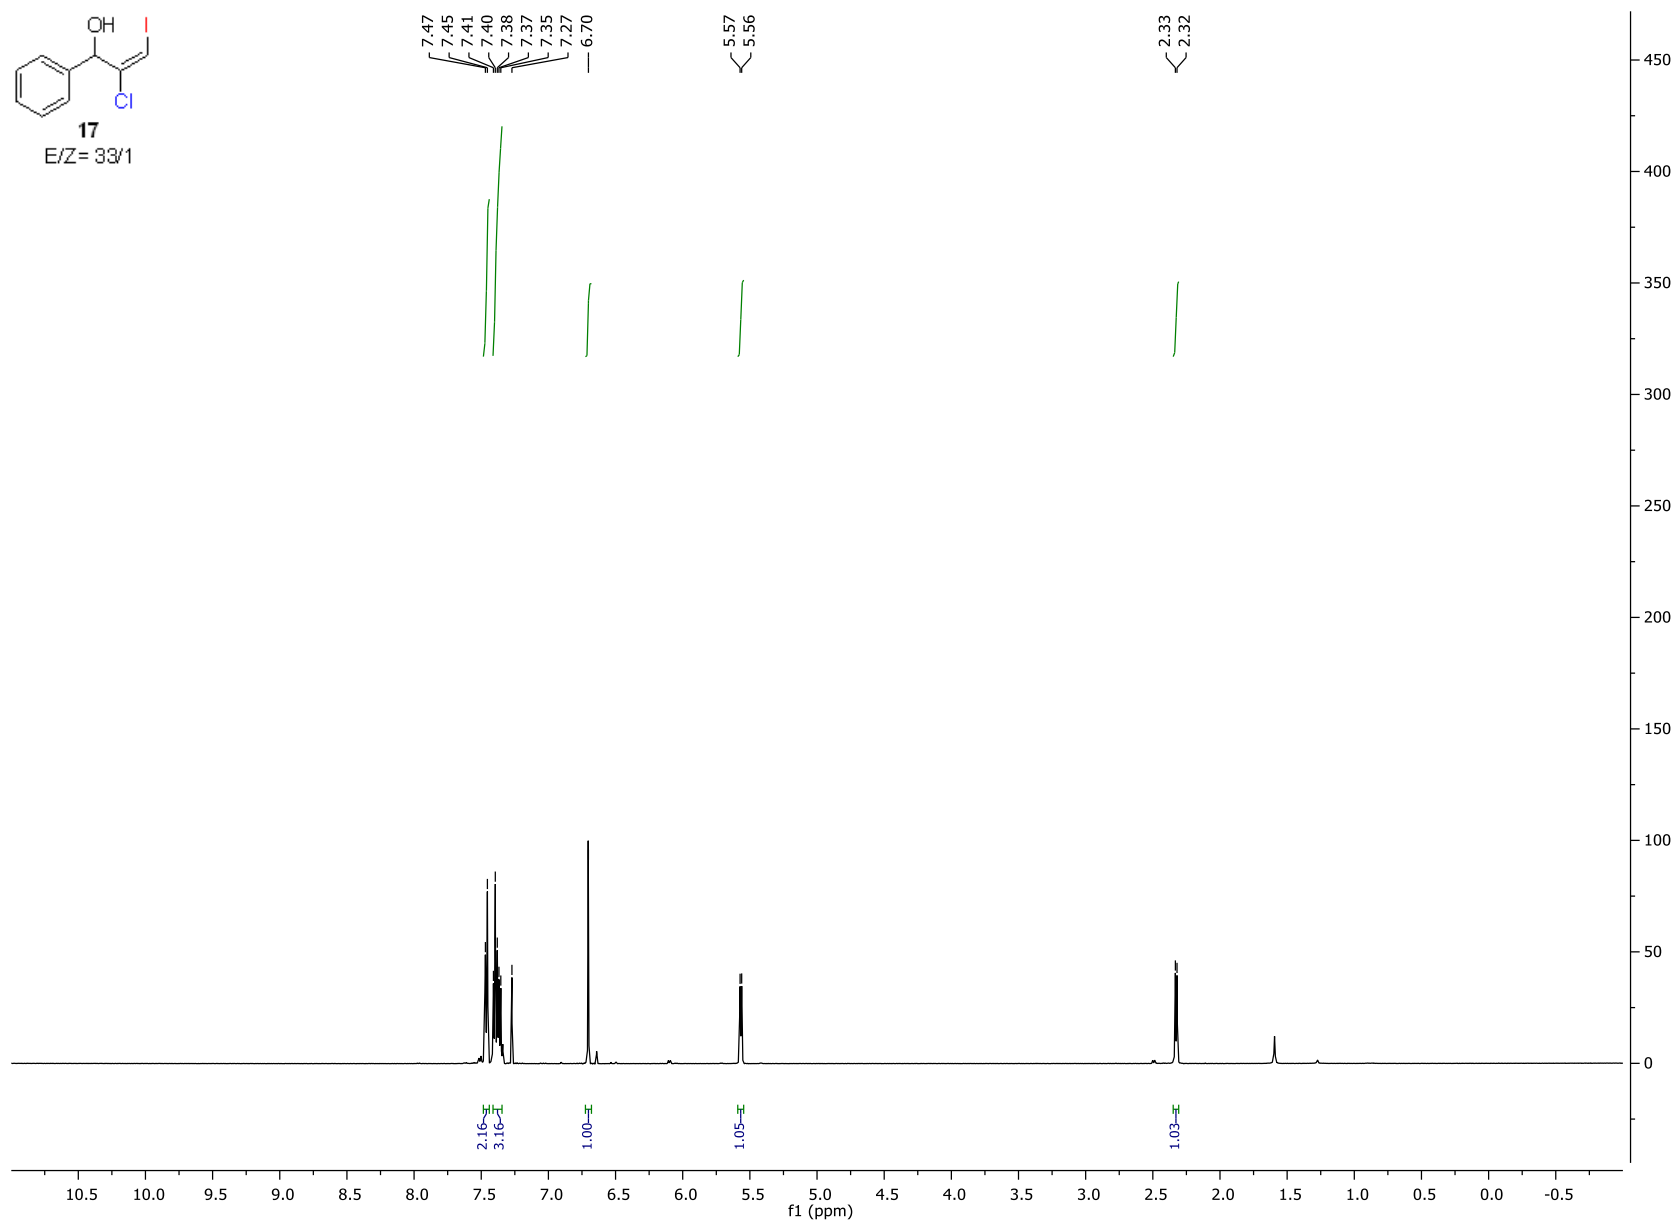



Figure S51.  $^{13}\text{C}$ -NMR of 17

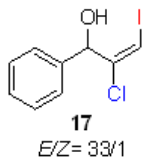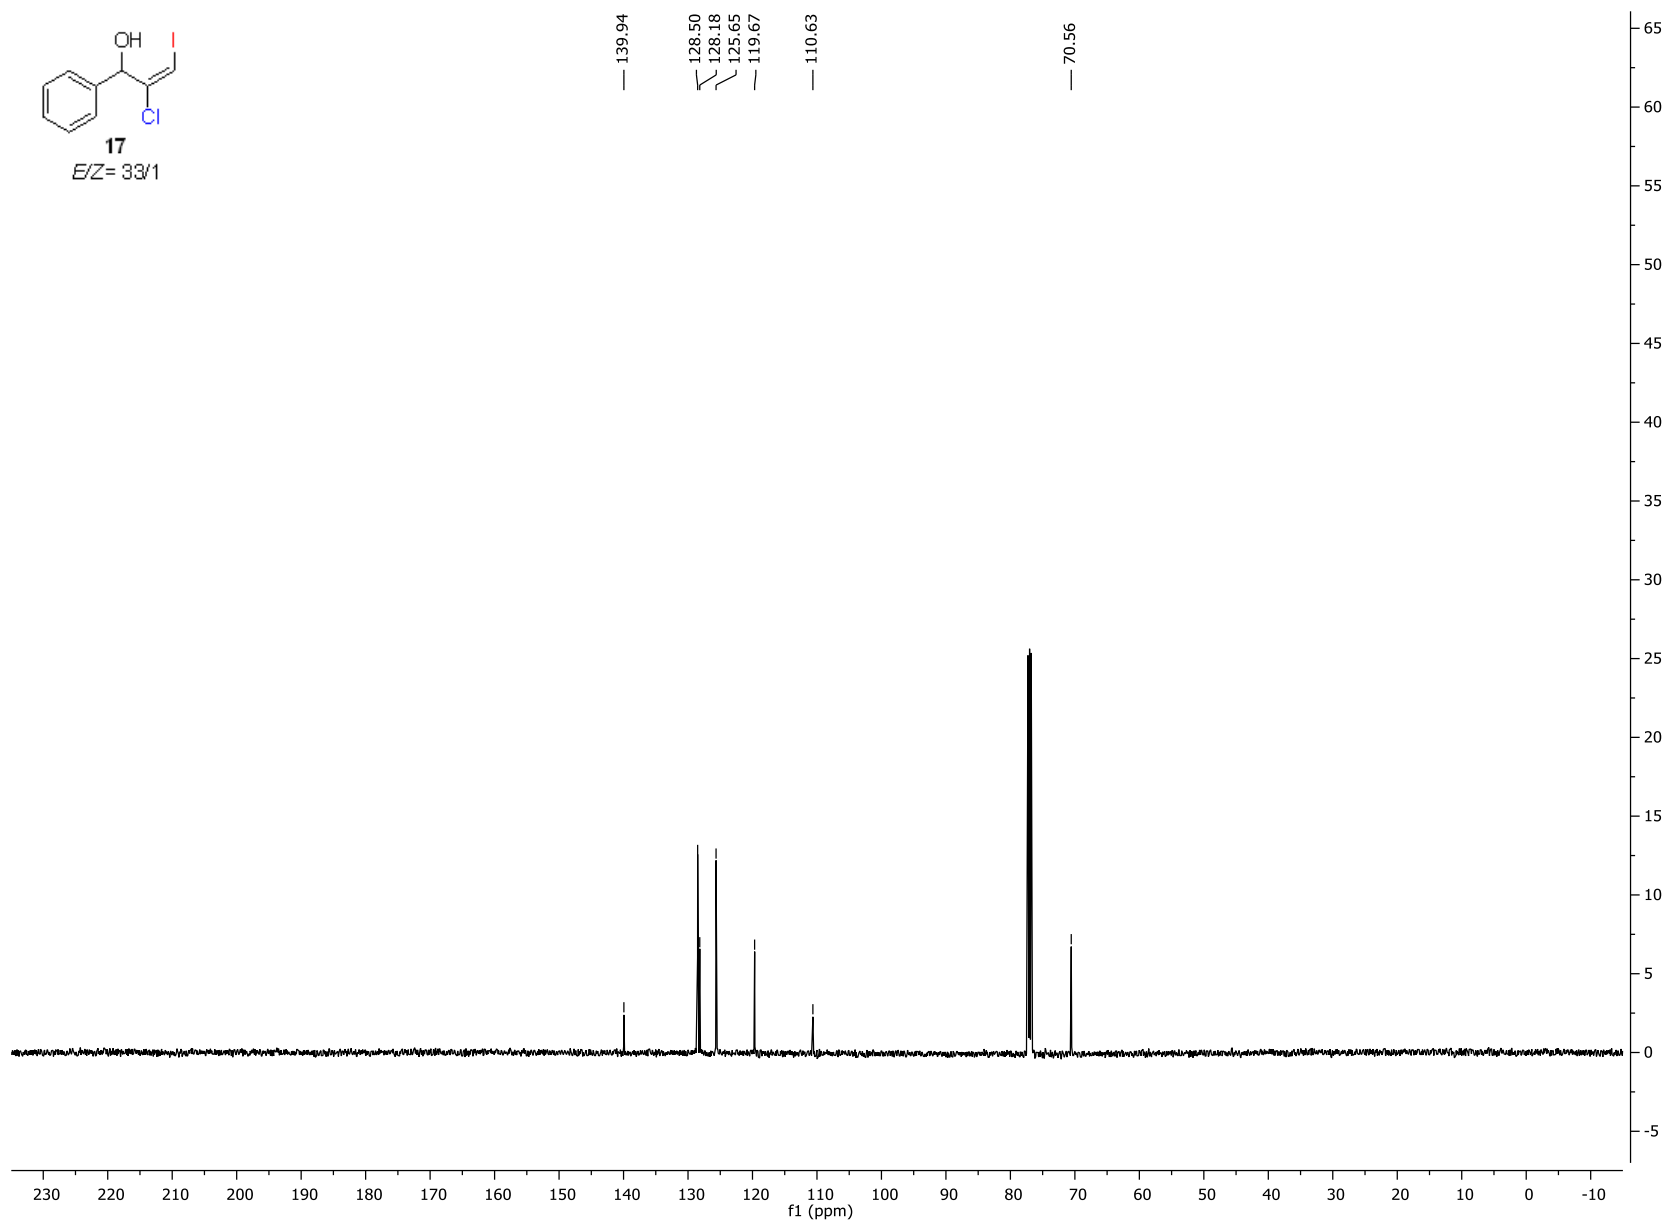

Figure S52. <sup>1</sup>H-NMR of 18

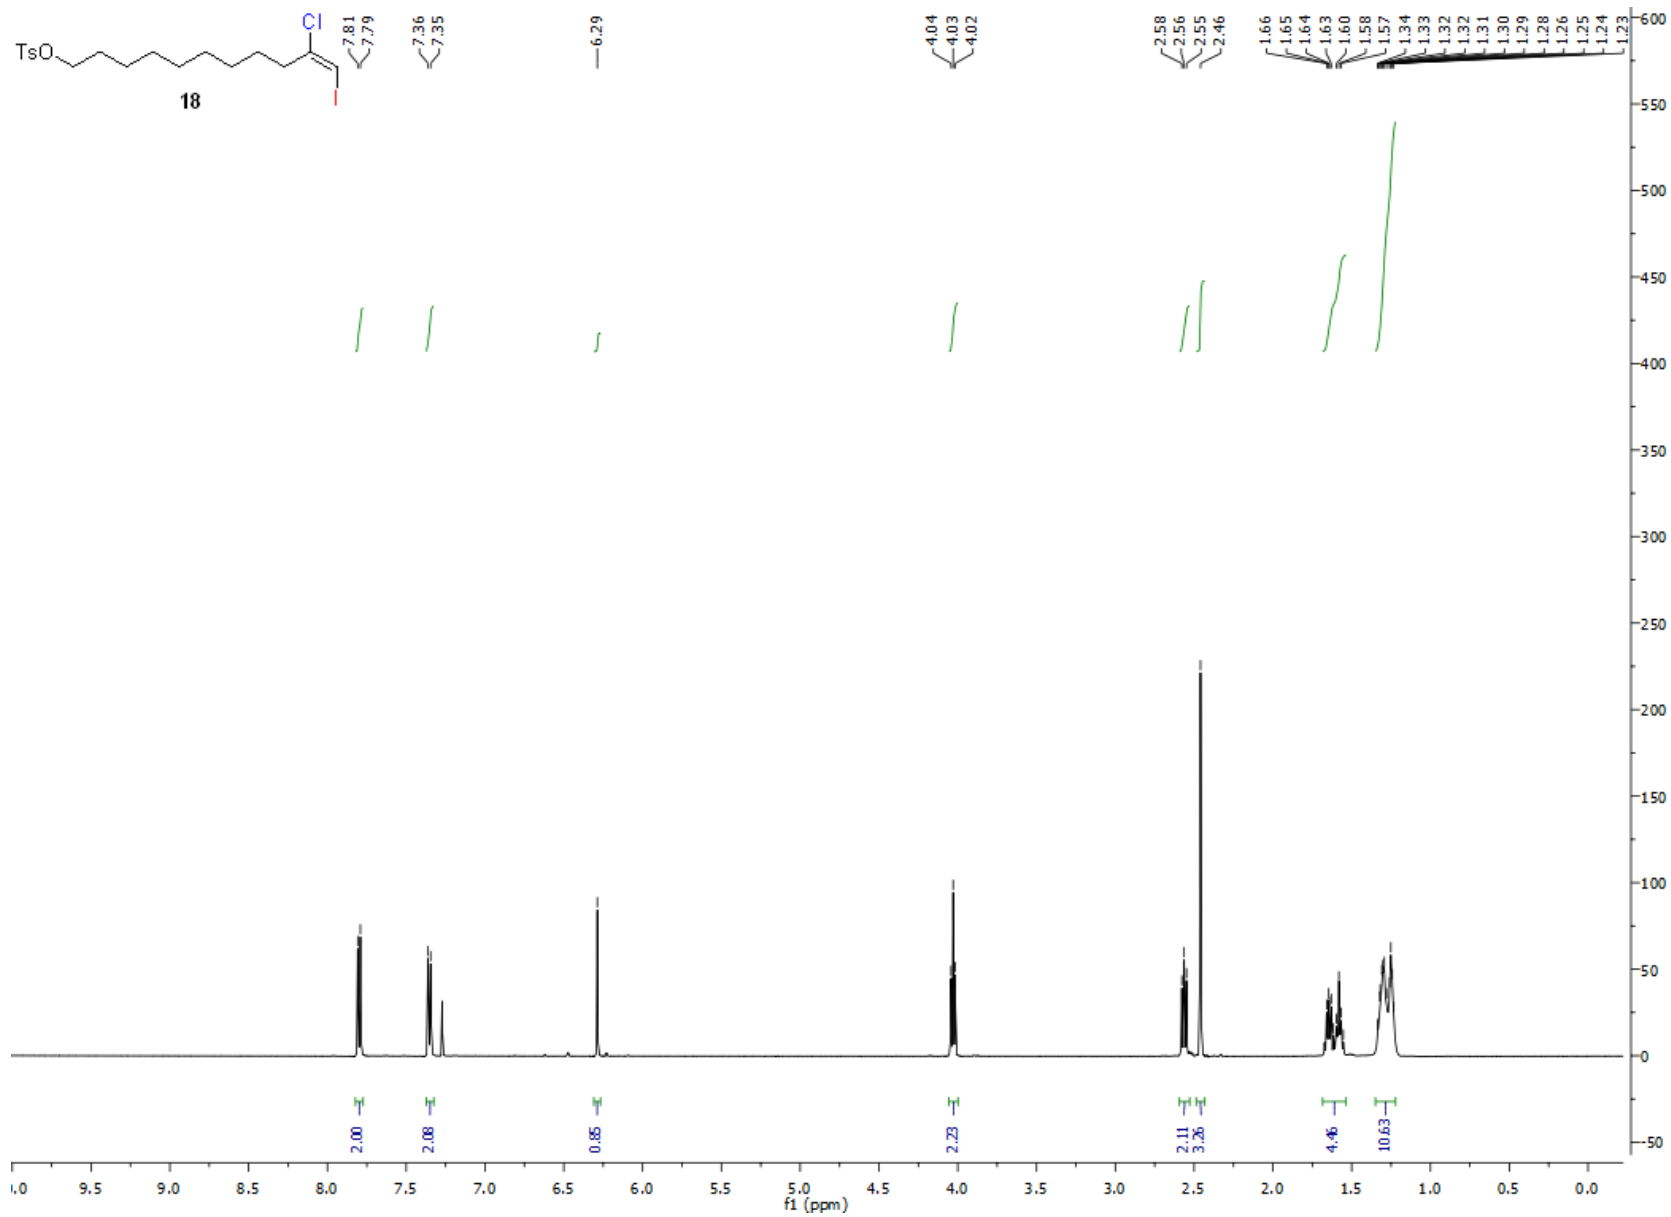

Figure S53.  $^{13}\text{C}$ -NMR of 18

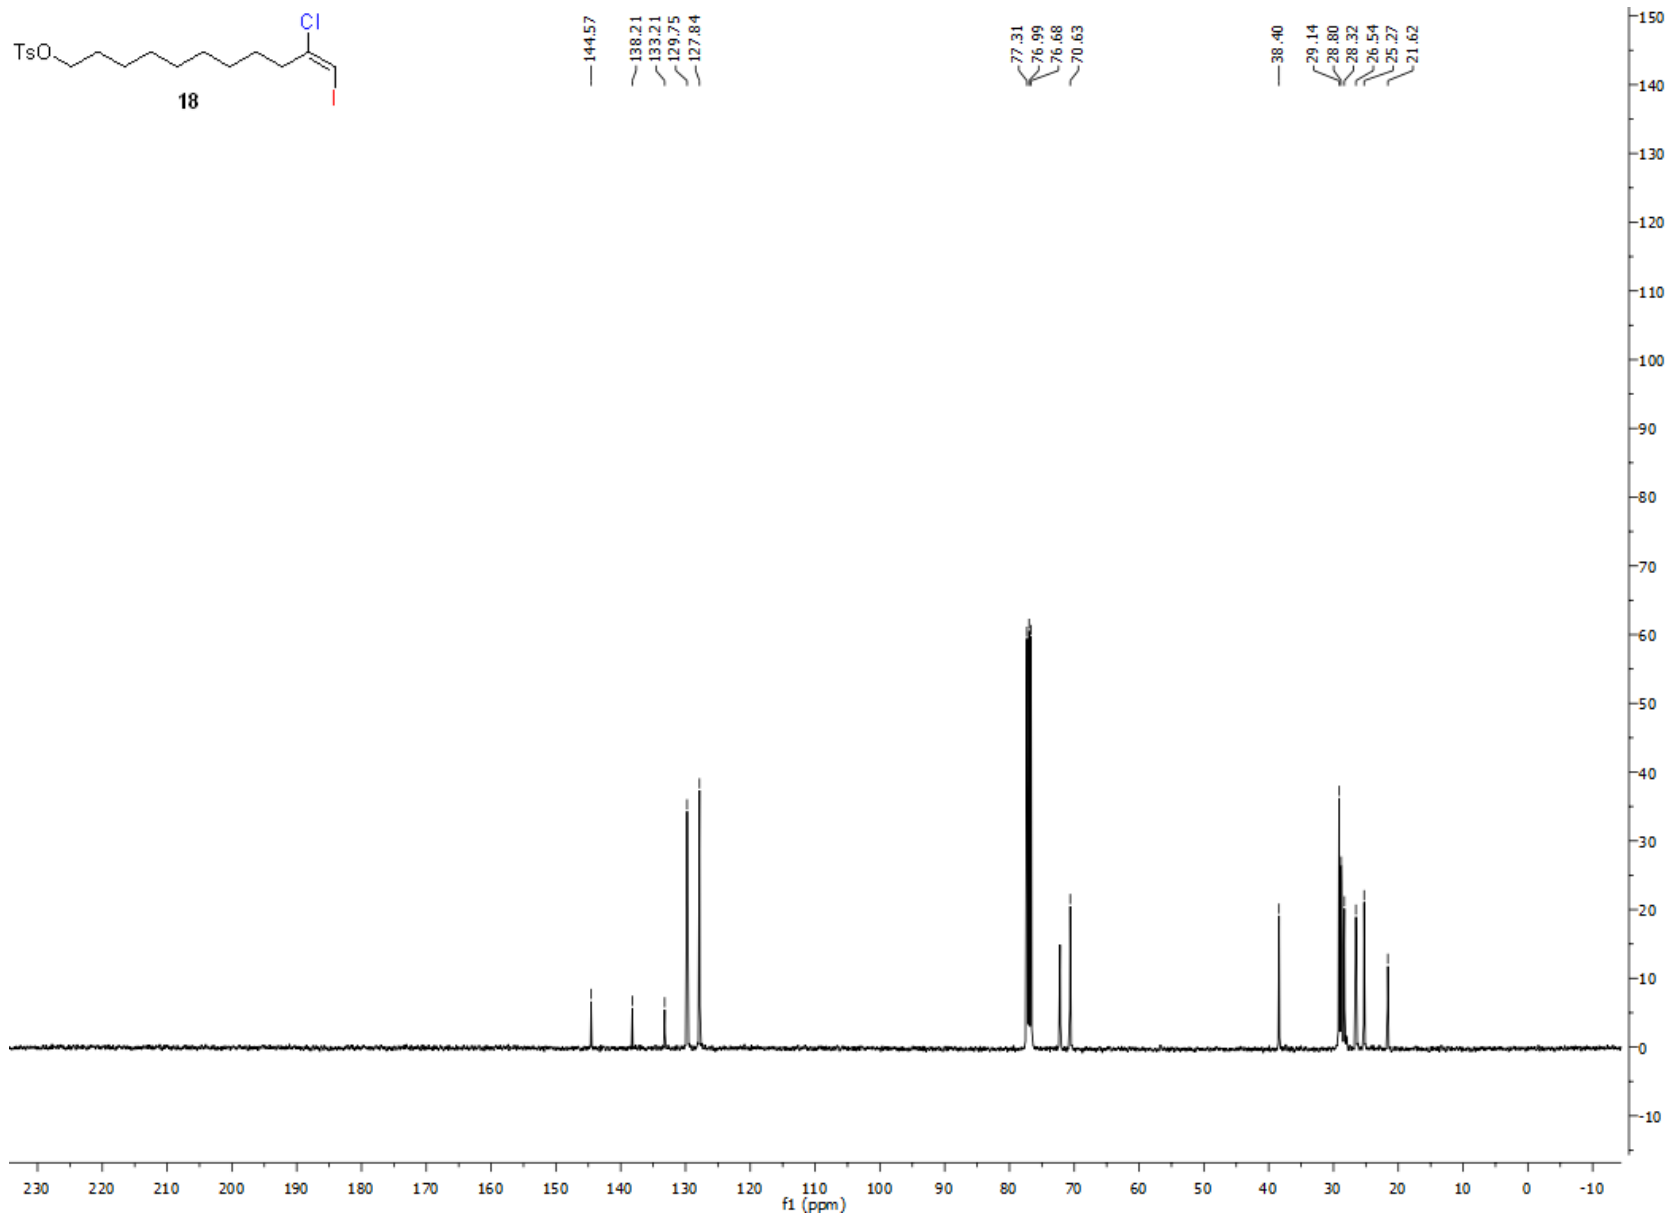

Figure S54. <sup>1</sup>H-NMR of **19**

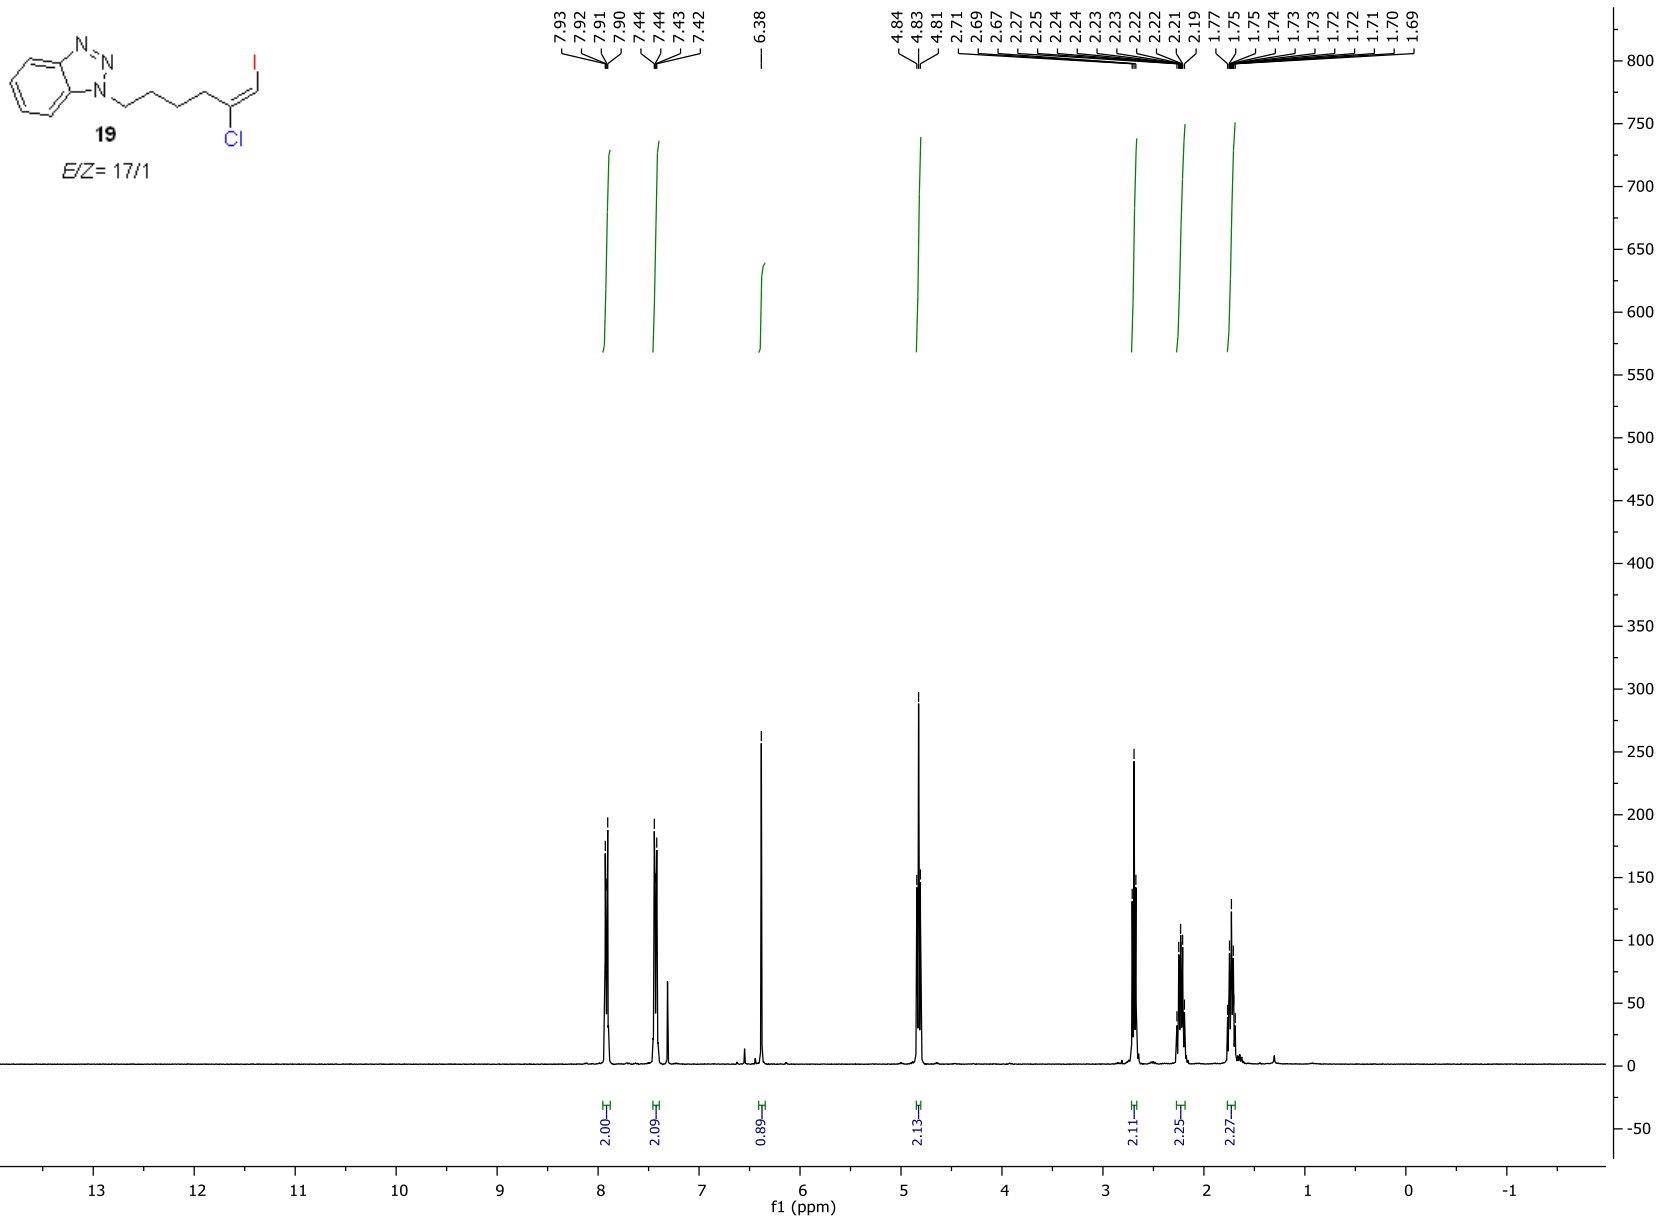

Figure S55. <sup>13</sup>C-NMR of 19

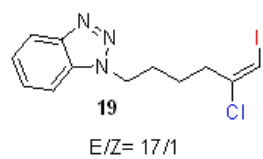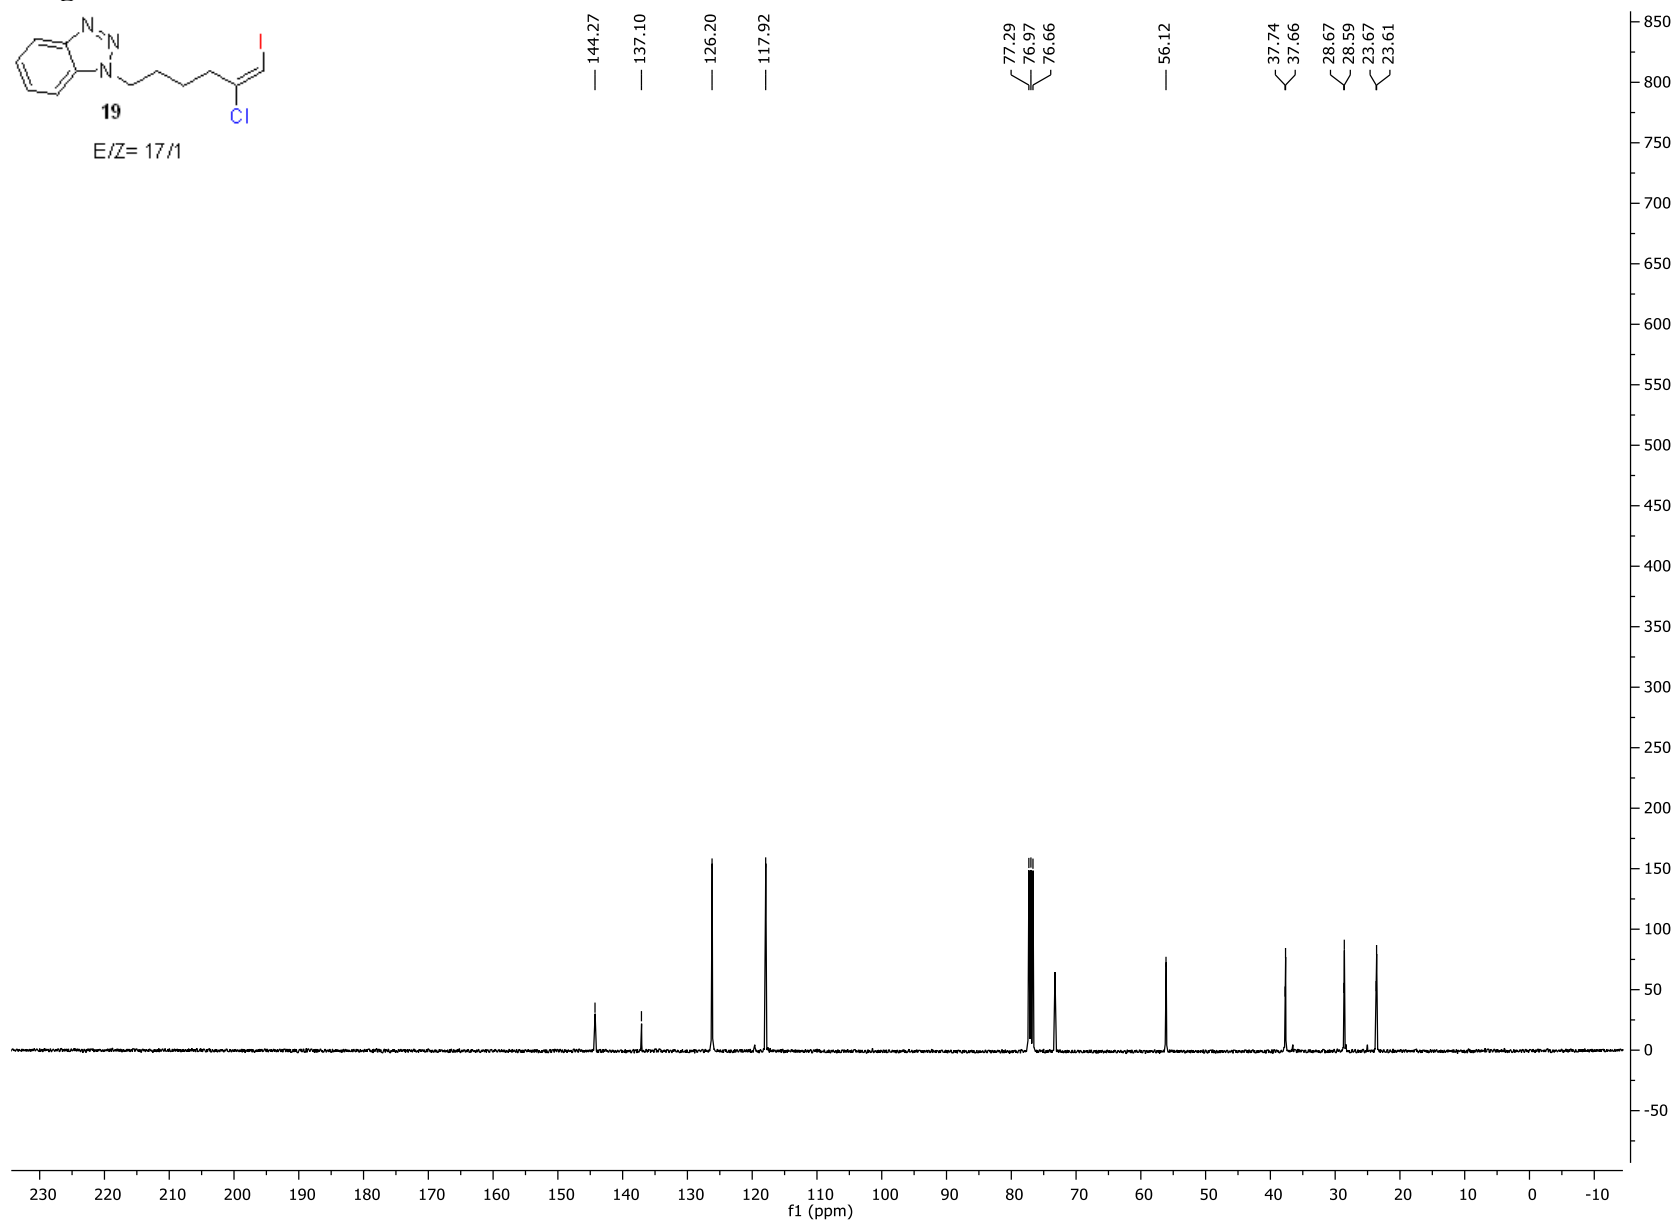

Figure S56. <sup>1</sup>H-NMR of 20

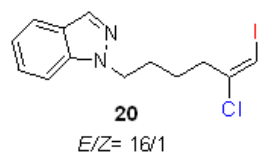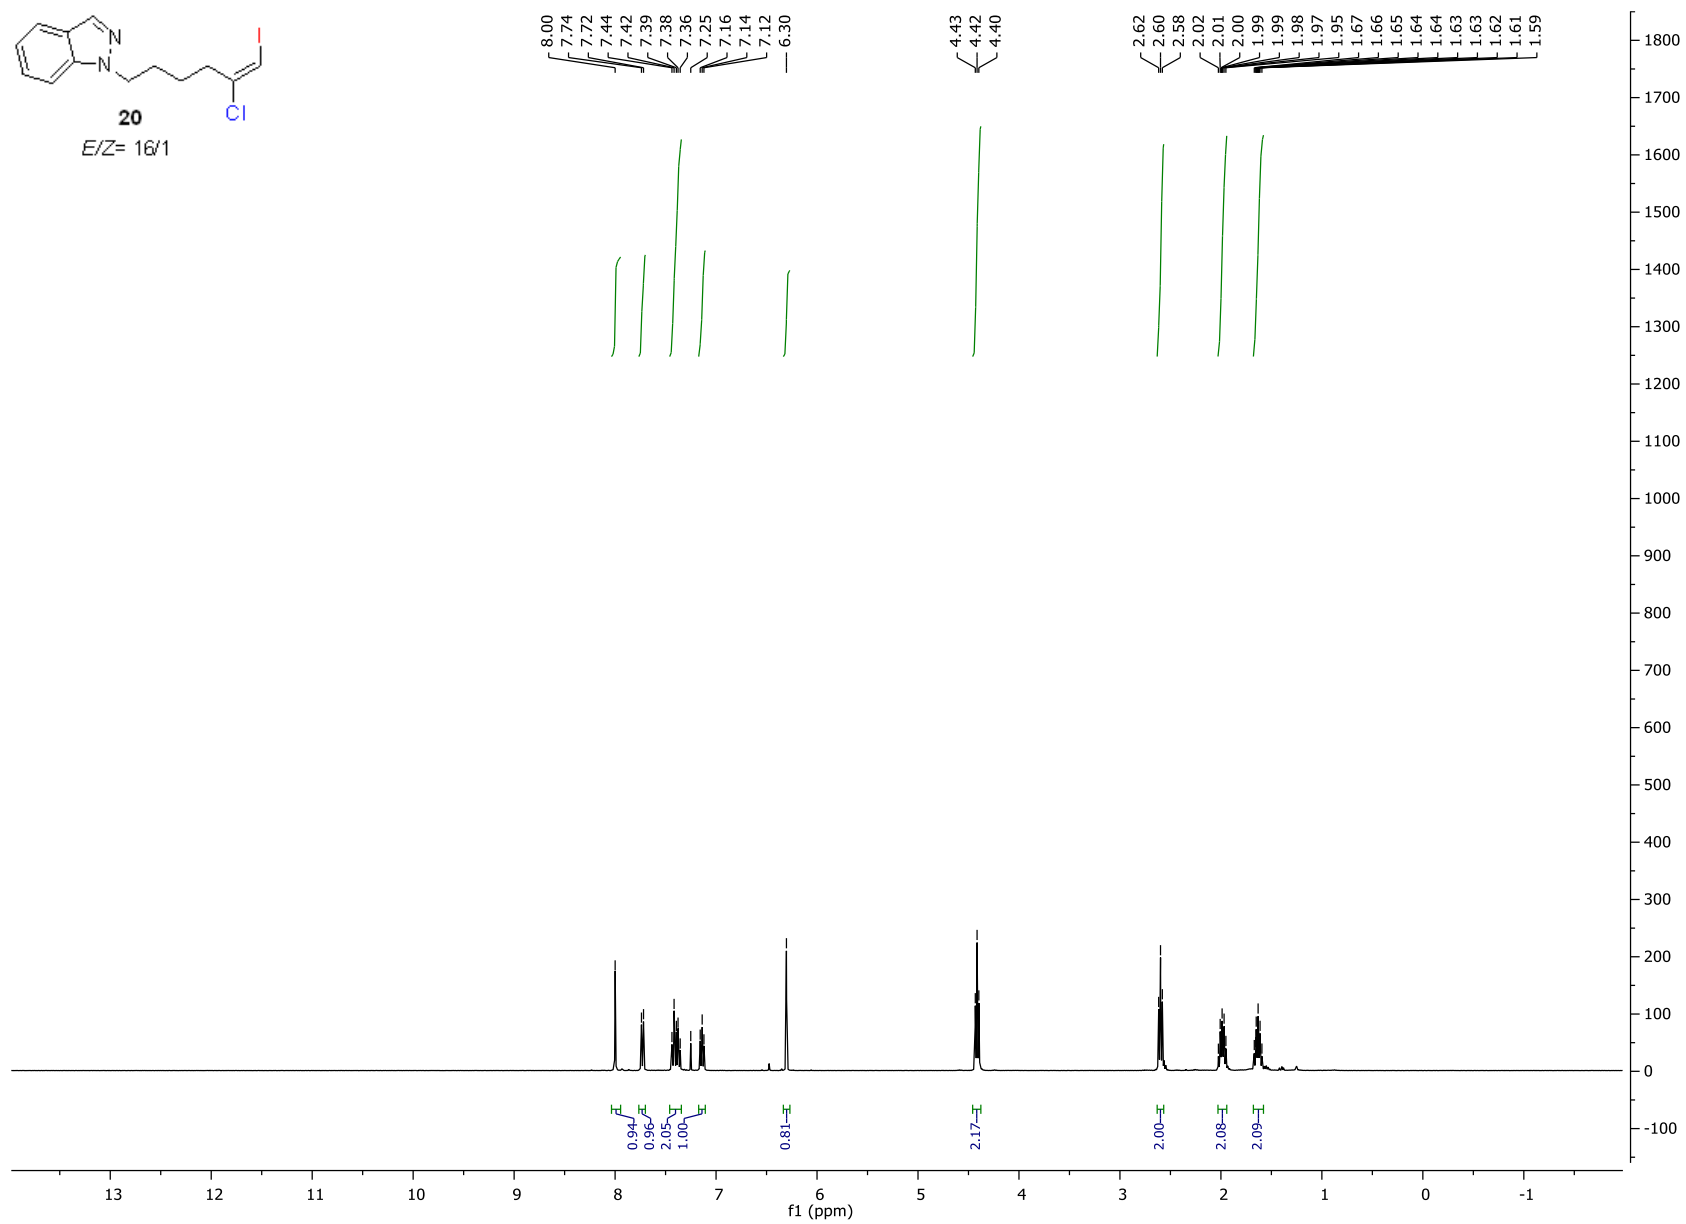

Figure S57.  $^{13}\text{C}$ -NMR of **20**

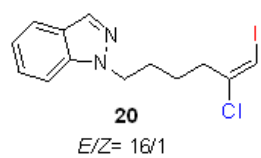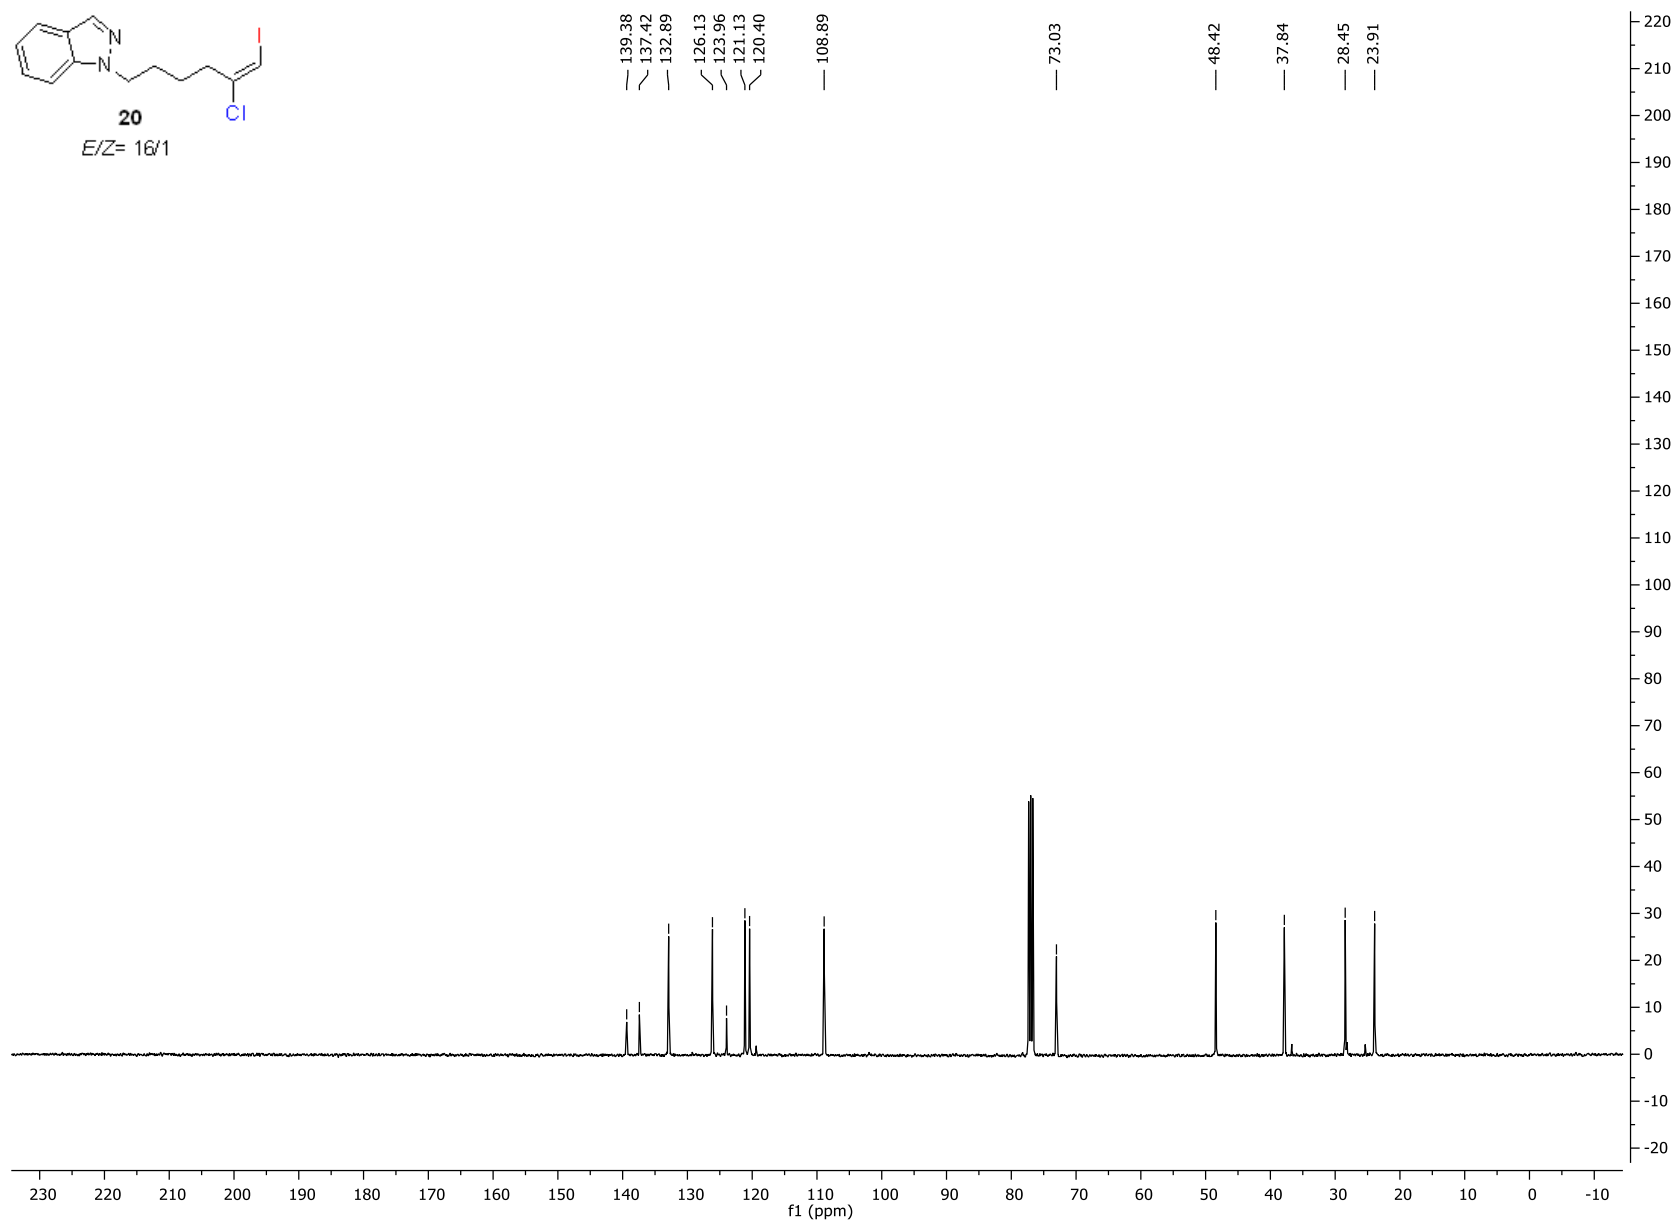

Figure S58. <sup>1</sup>H-NMR of 21

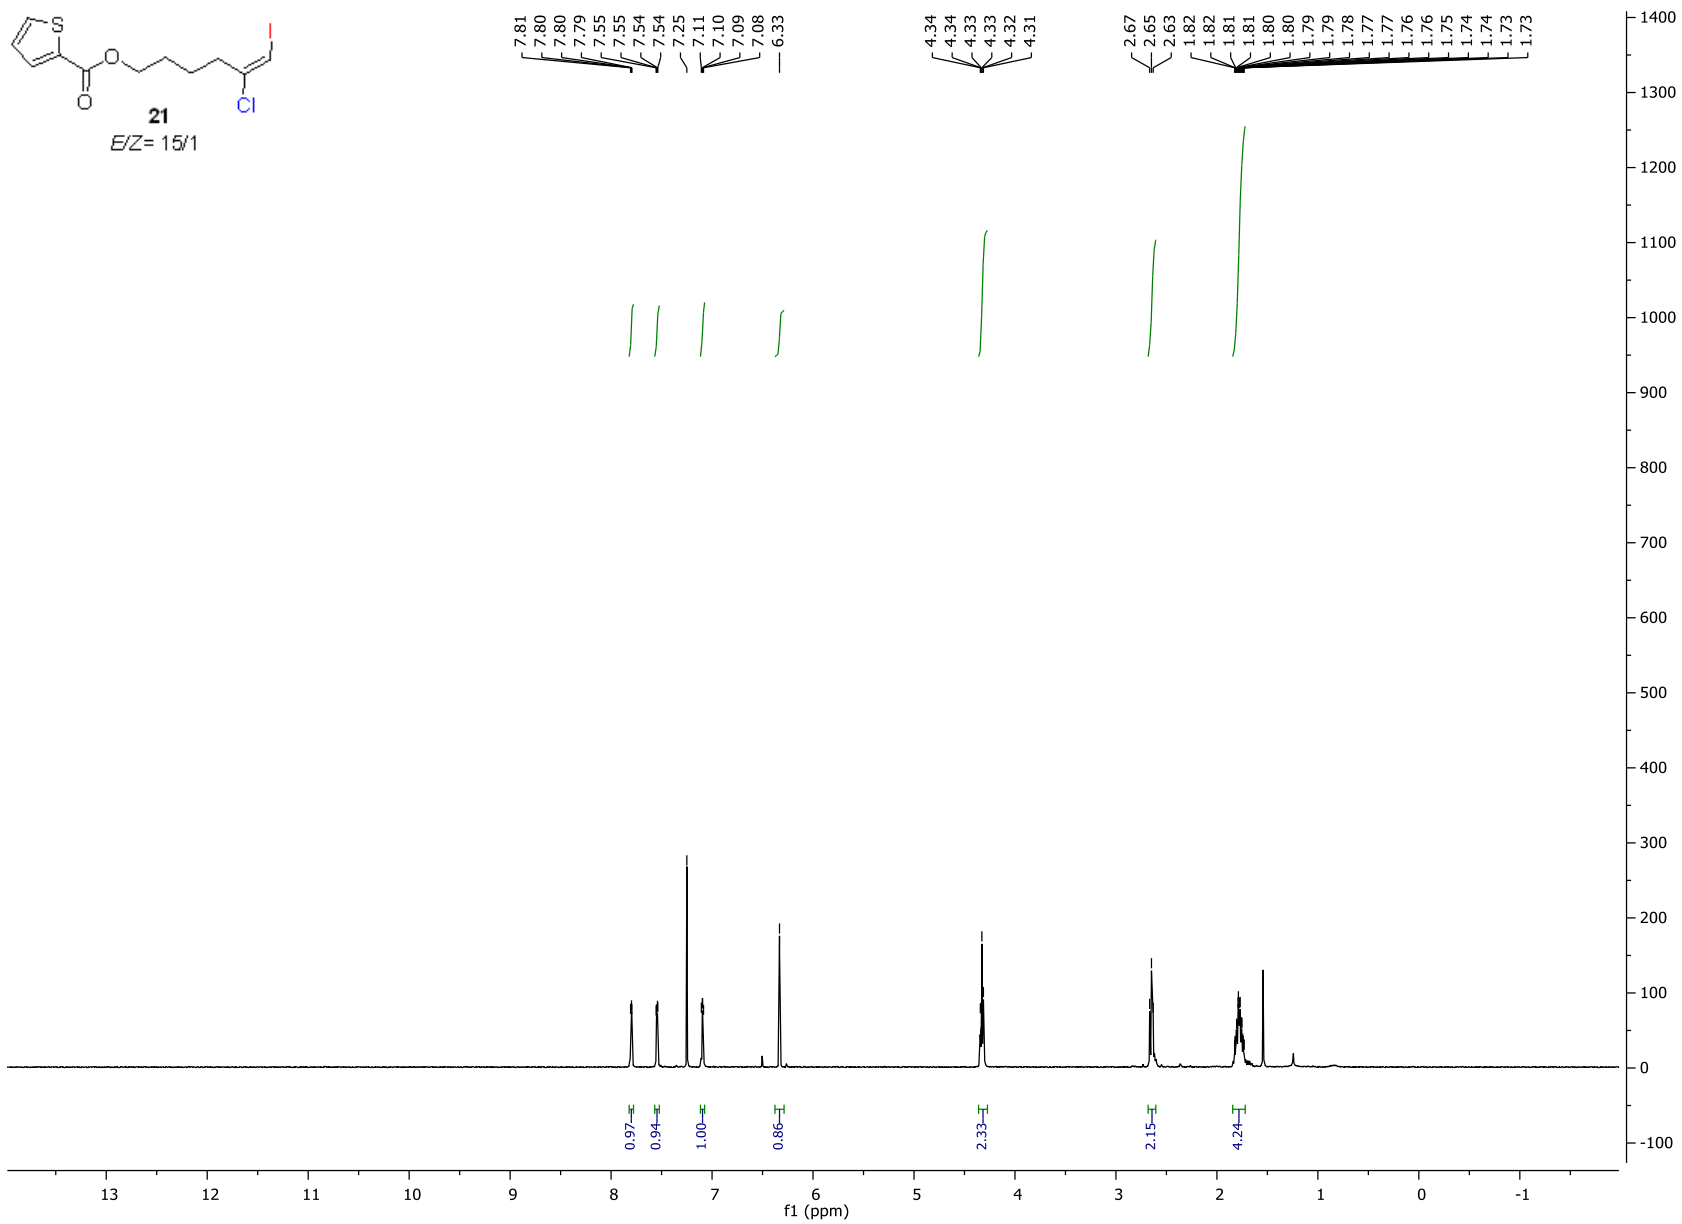



Figure S59. <sup>13</sup>C-NMR of 21

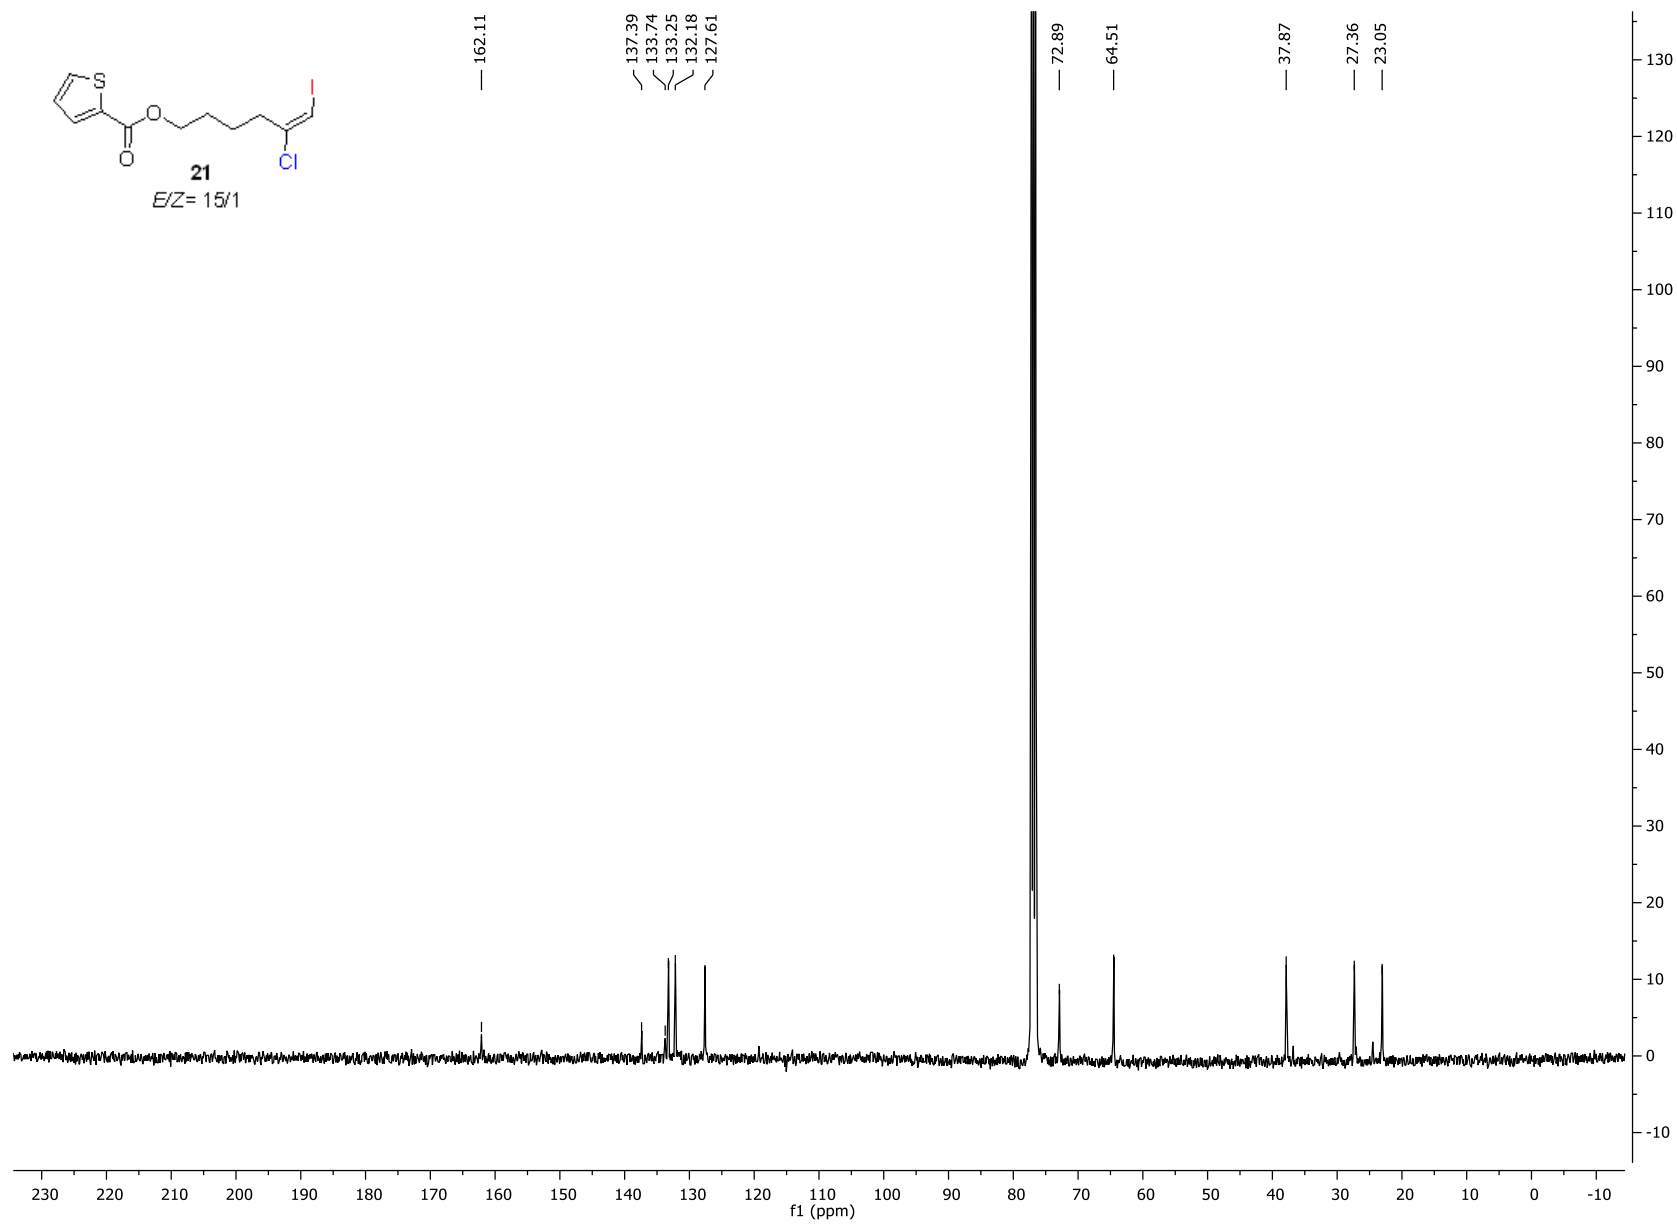

Figure S60. <sup>1</sup>H-NMR of 22

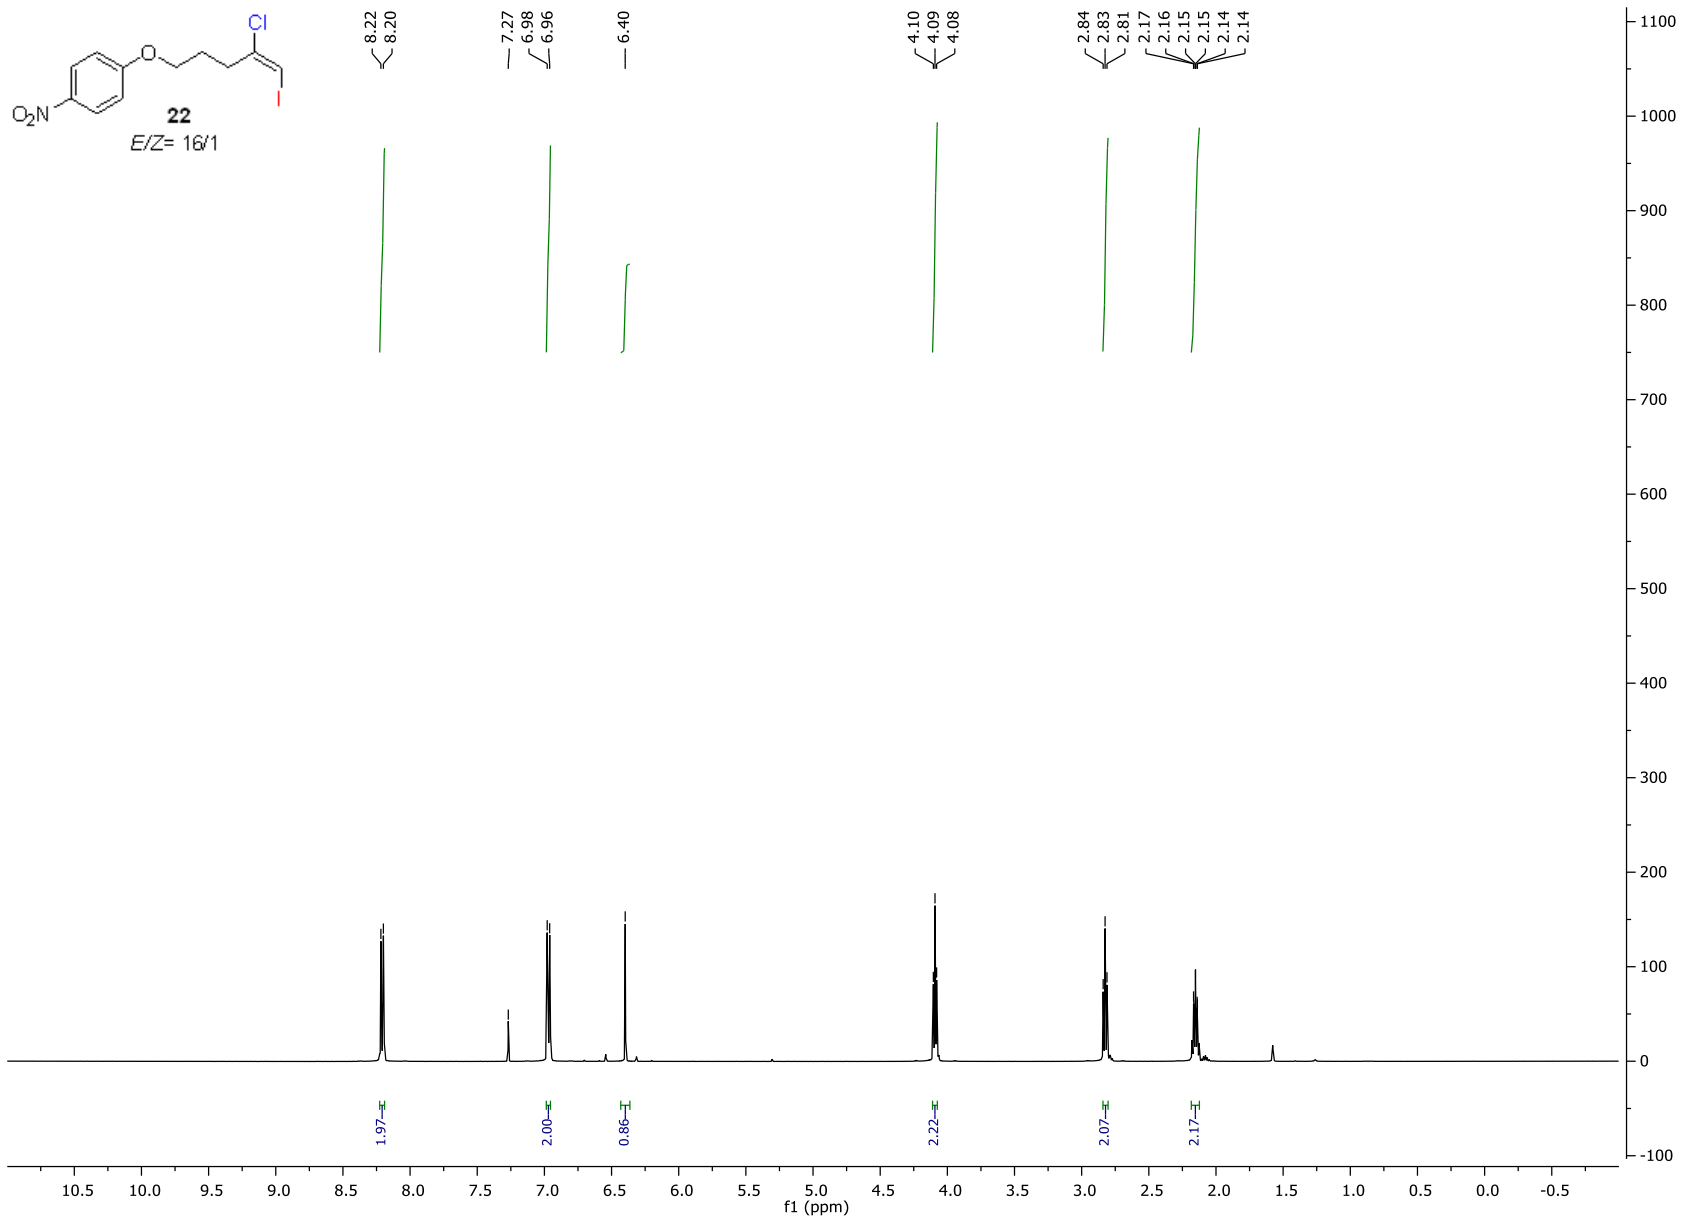

Figure S61.  $^{13}\text{C}$ -NMR of **22**

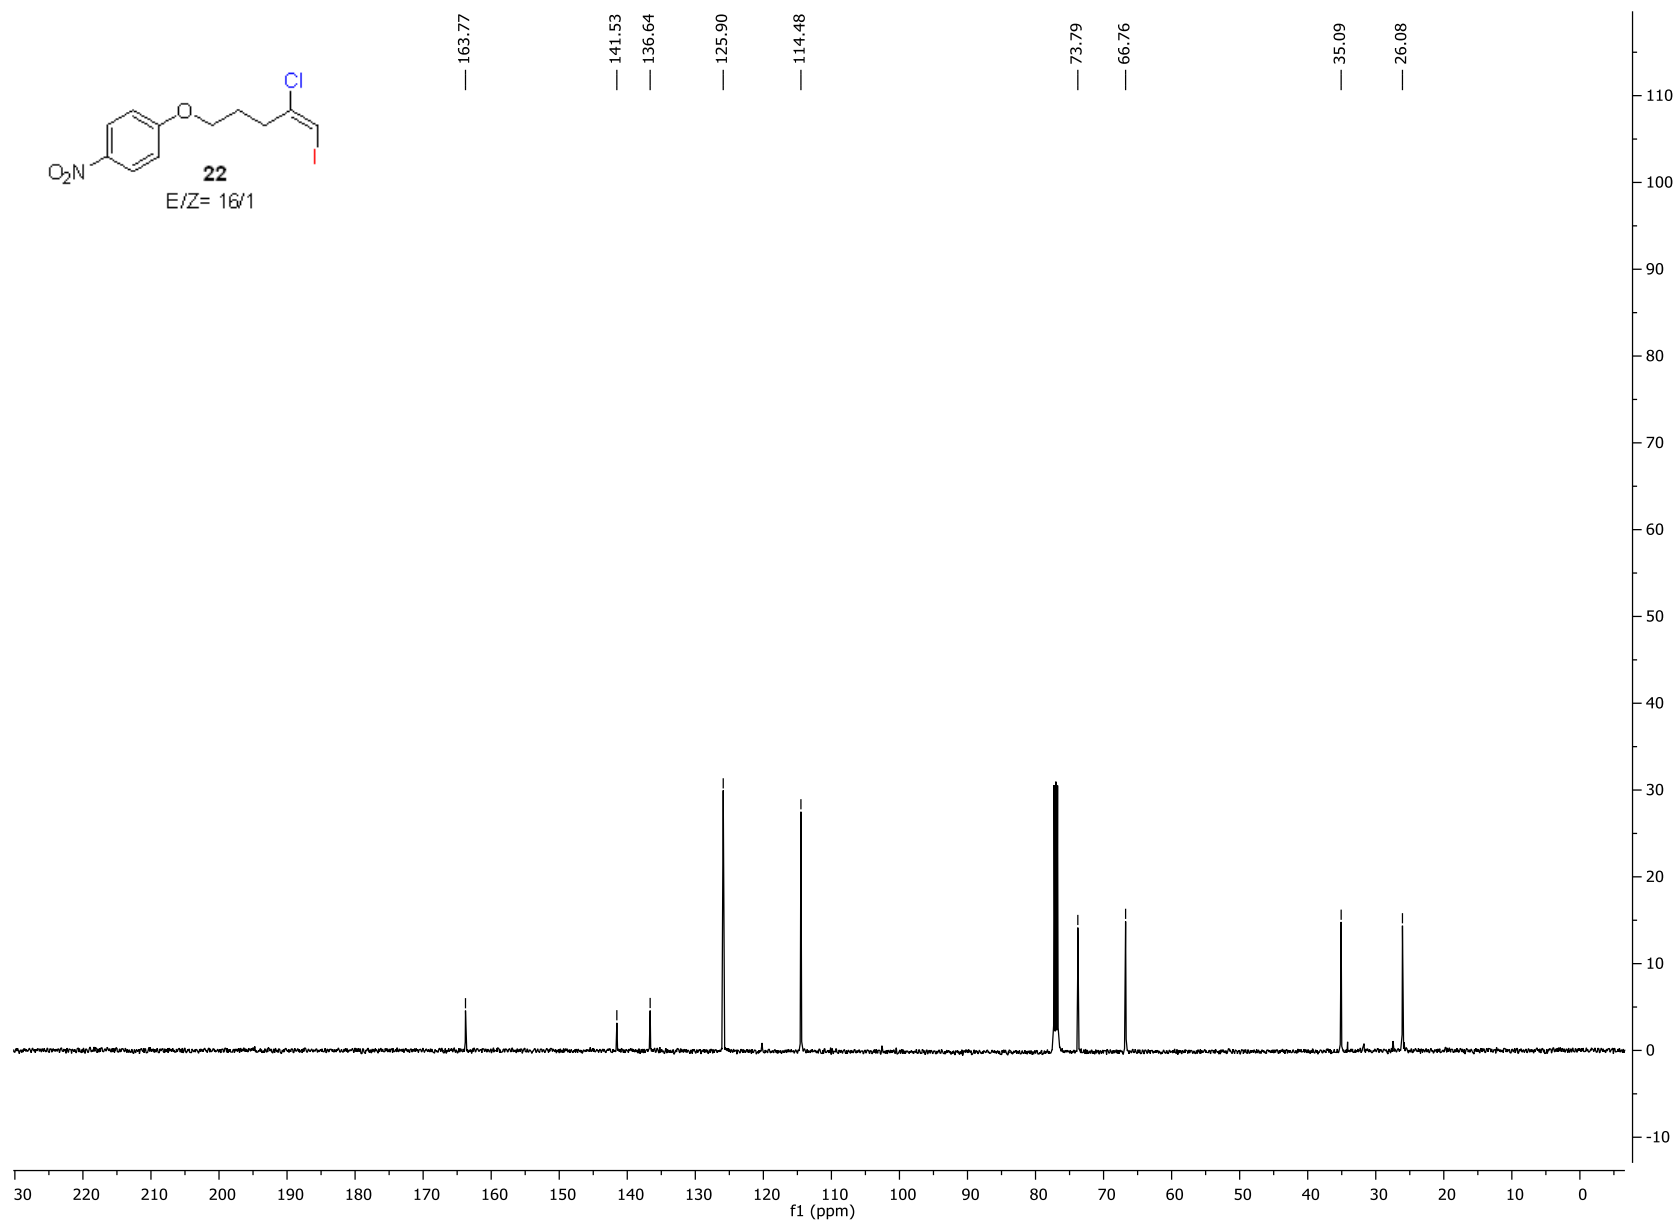

Figure S62.  $^1\text{H-NMR}$  of **23**

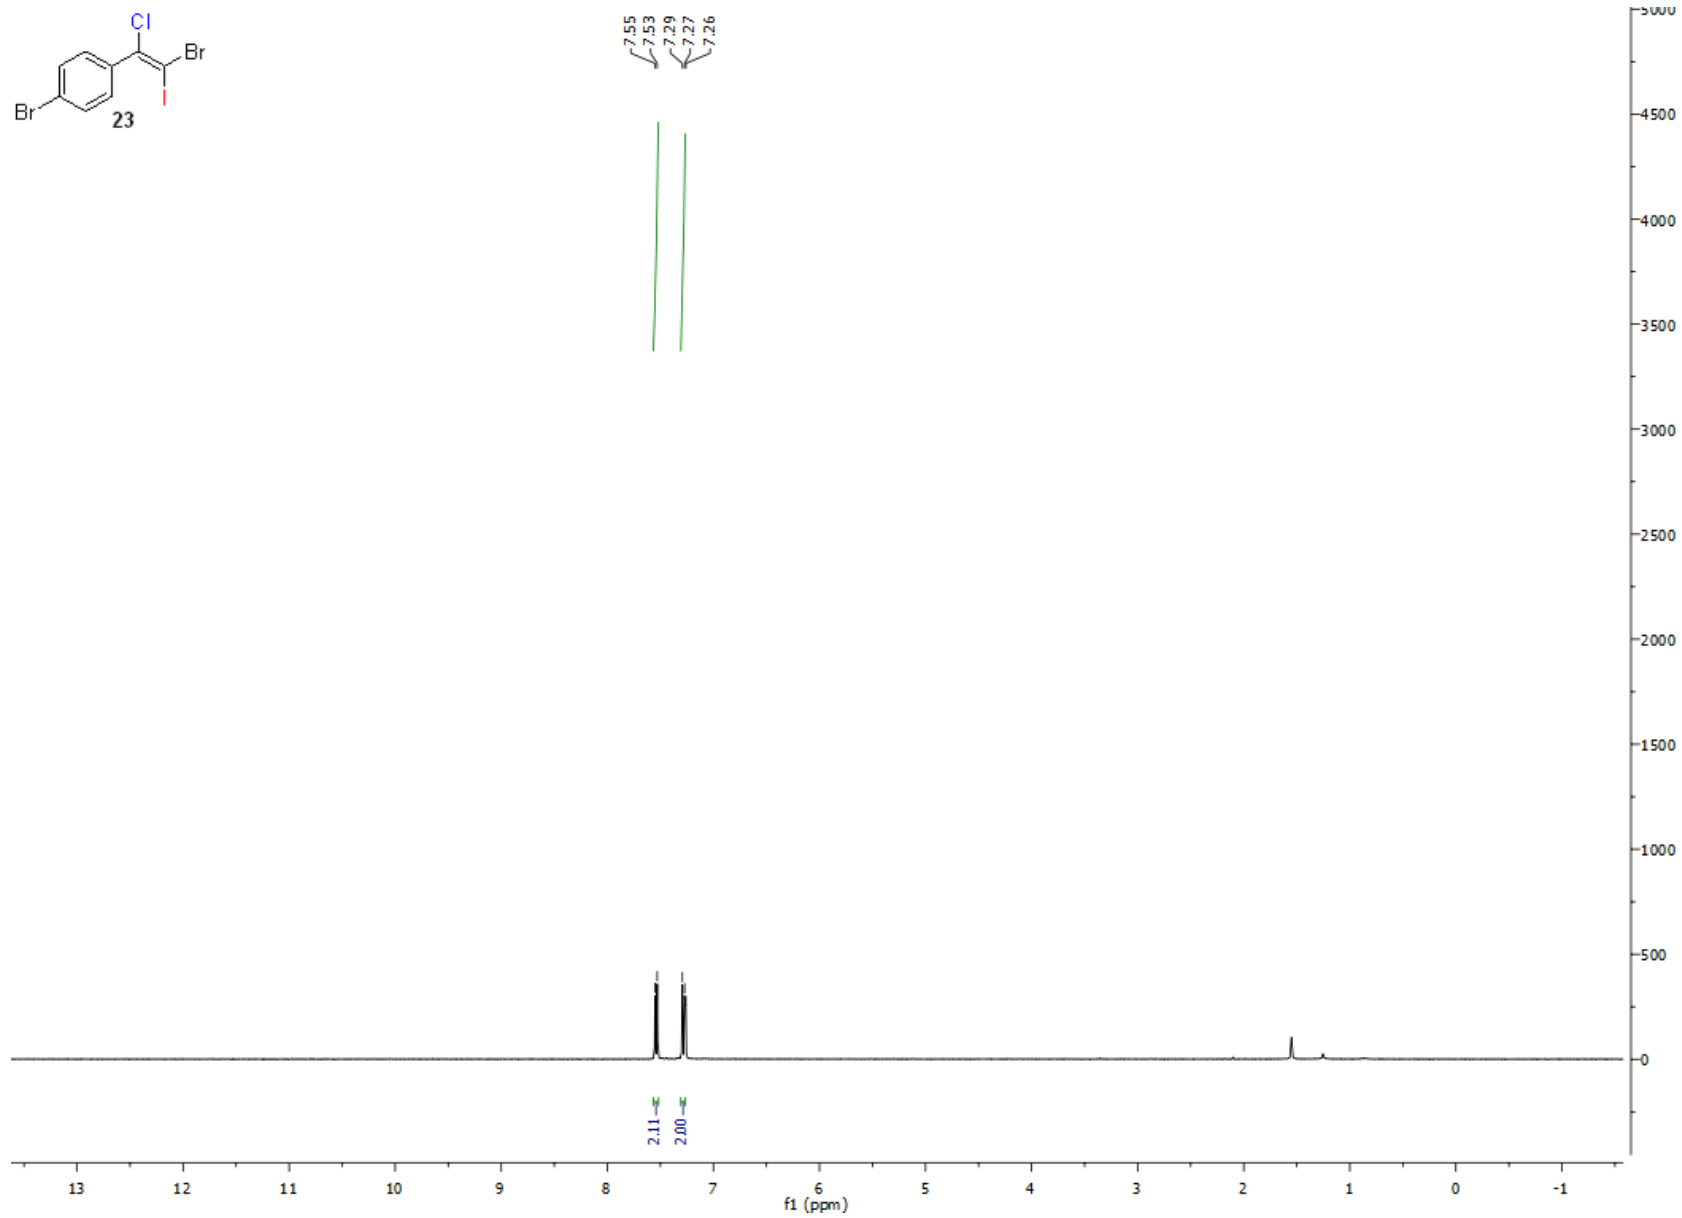

Figure S63.  $^{13}\text{C}$ -NMR of 23

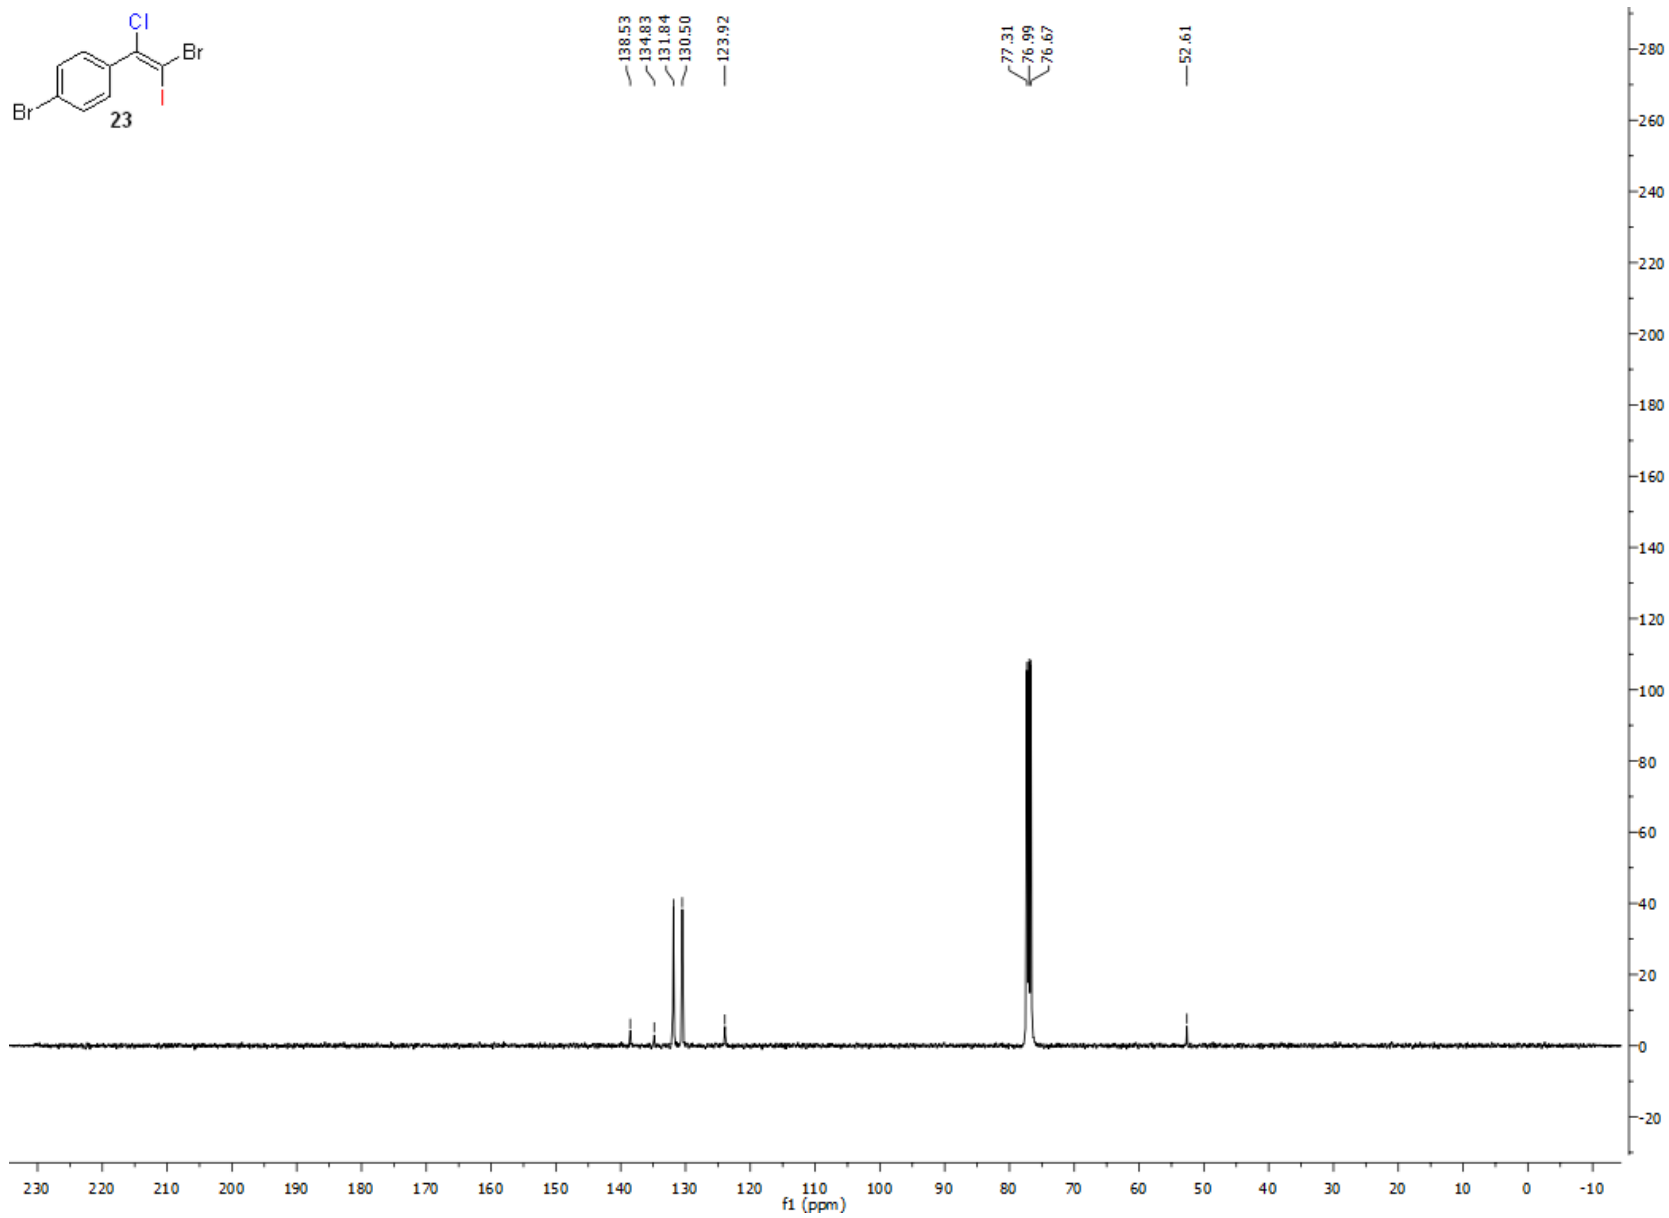

Figure S64.  $^1\text{H-NMR}$  of 24

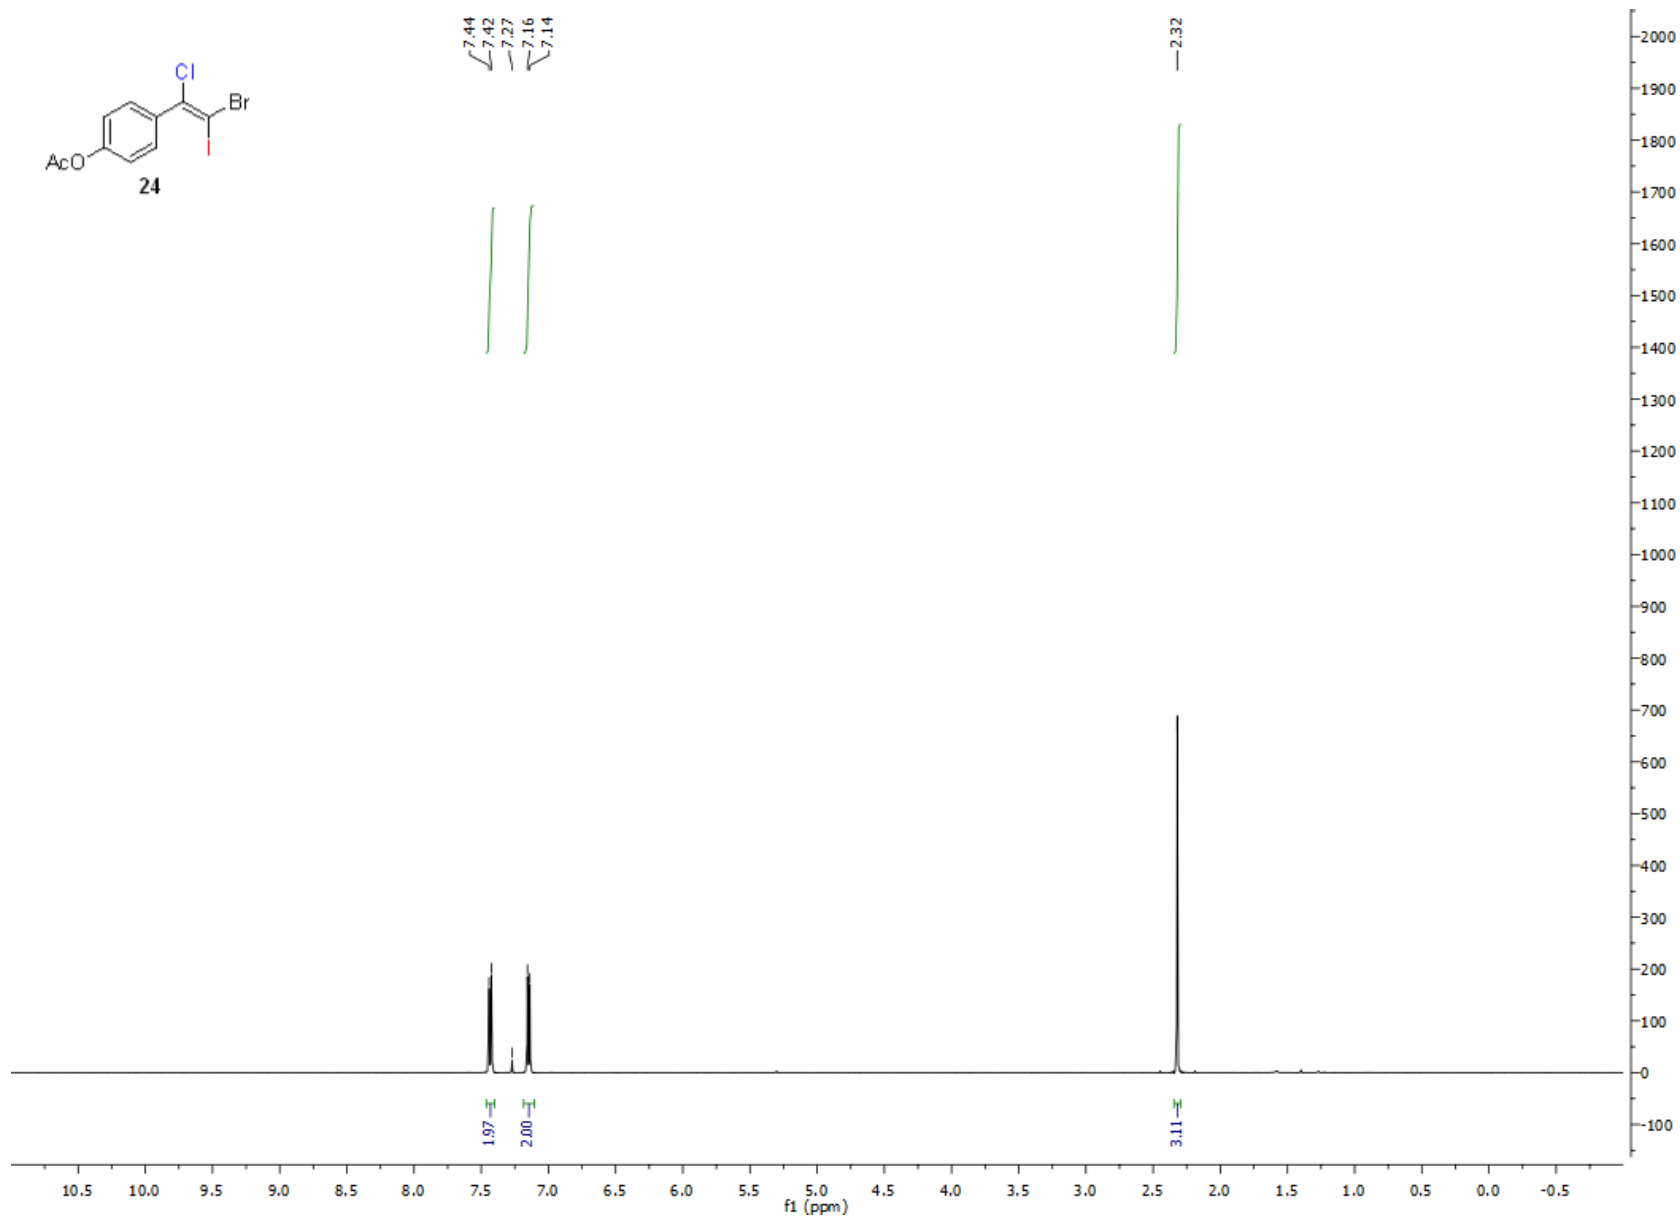

Figure S65.  $^{13}\text{C}$ -NMR of 24

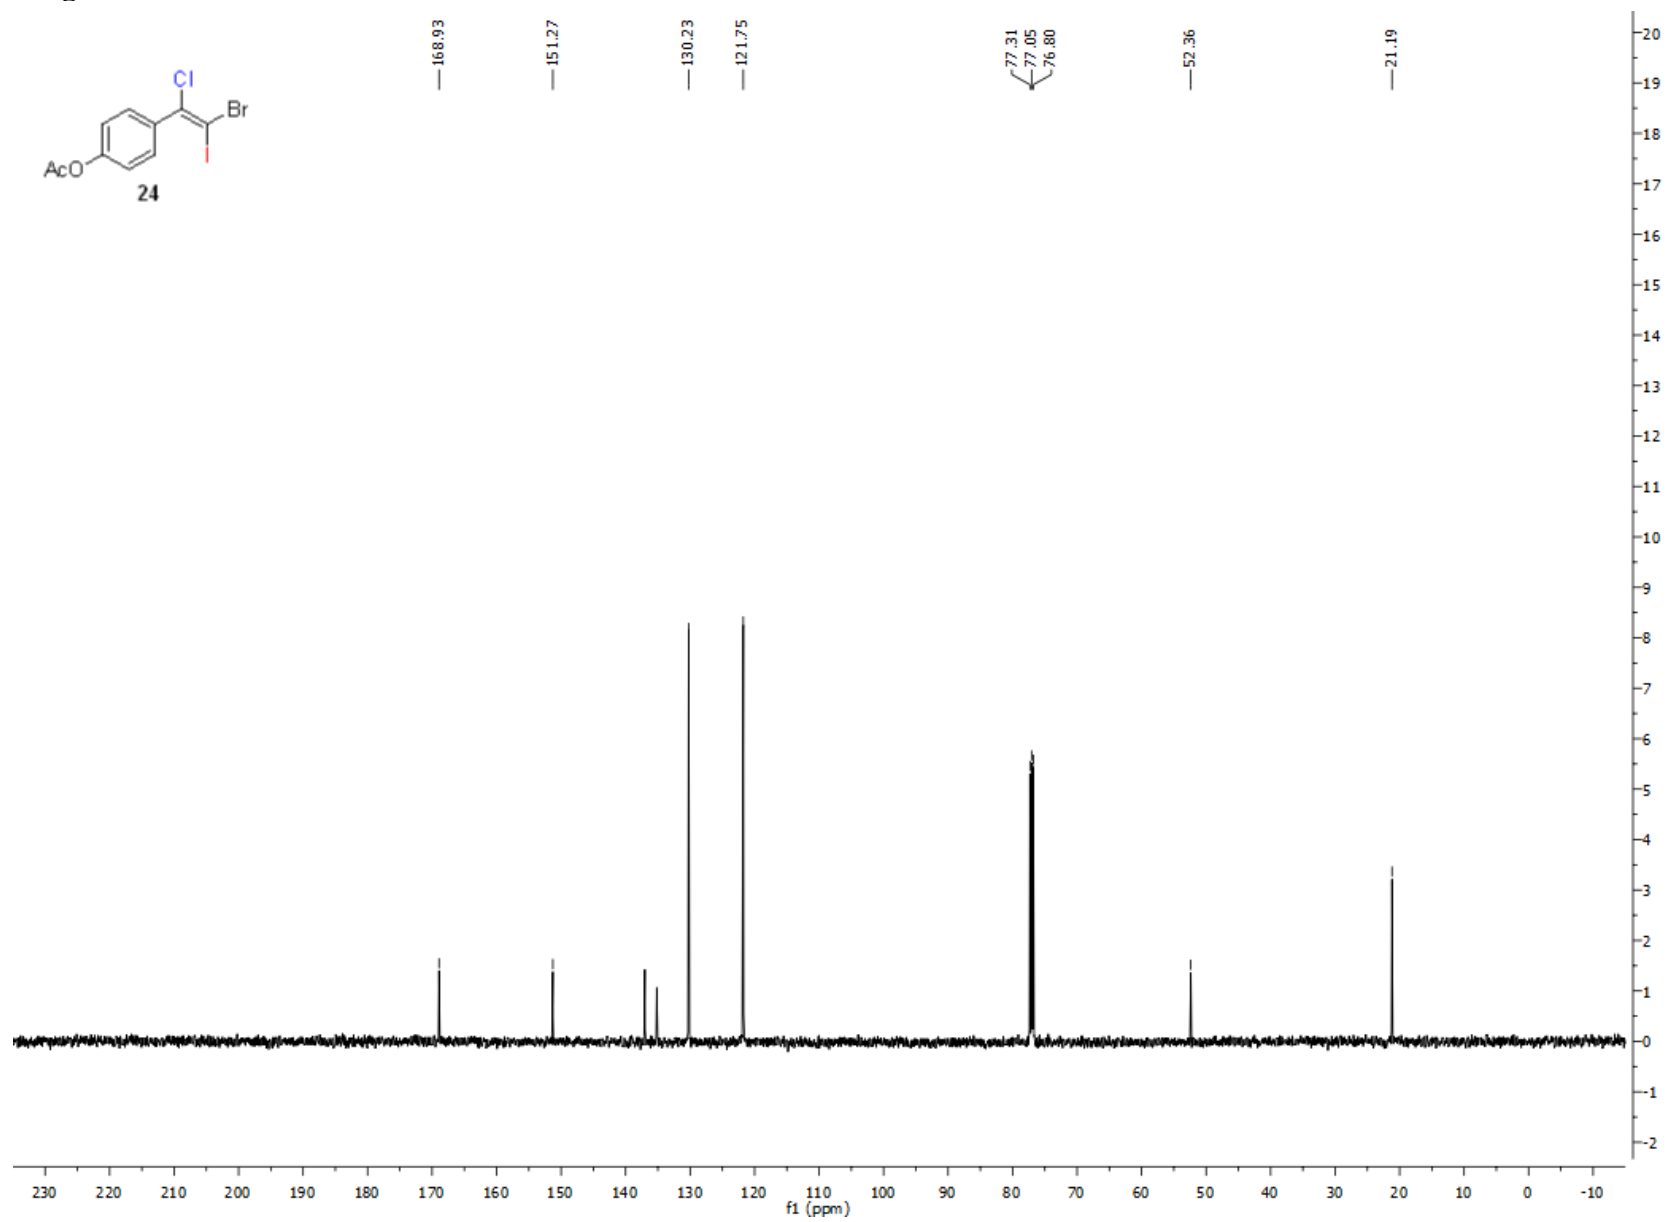

Figure S66. <sup>1</sup>H-NMR of 25

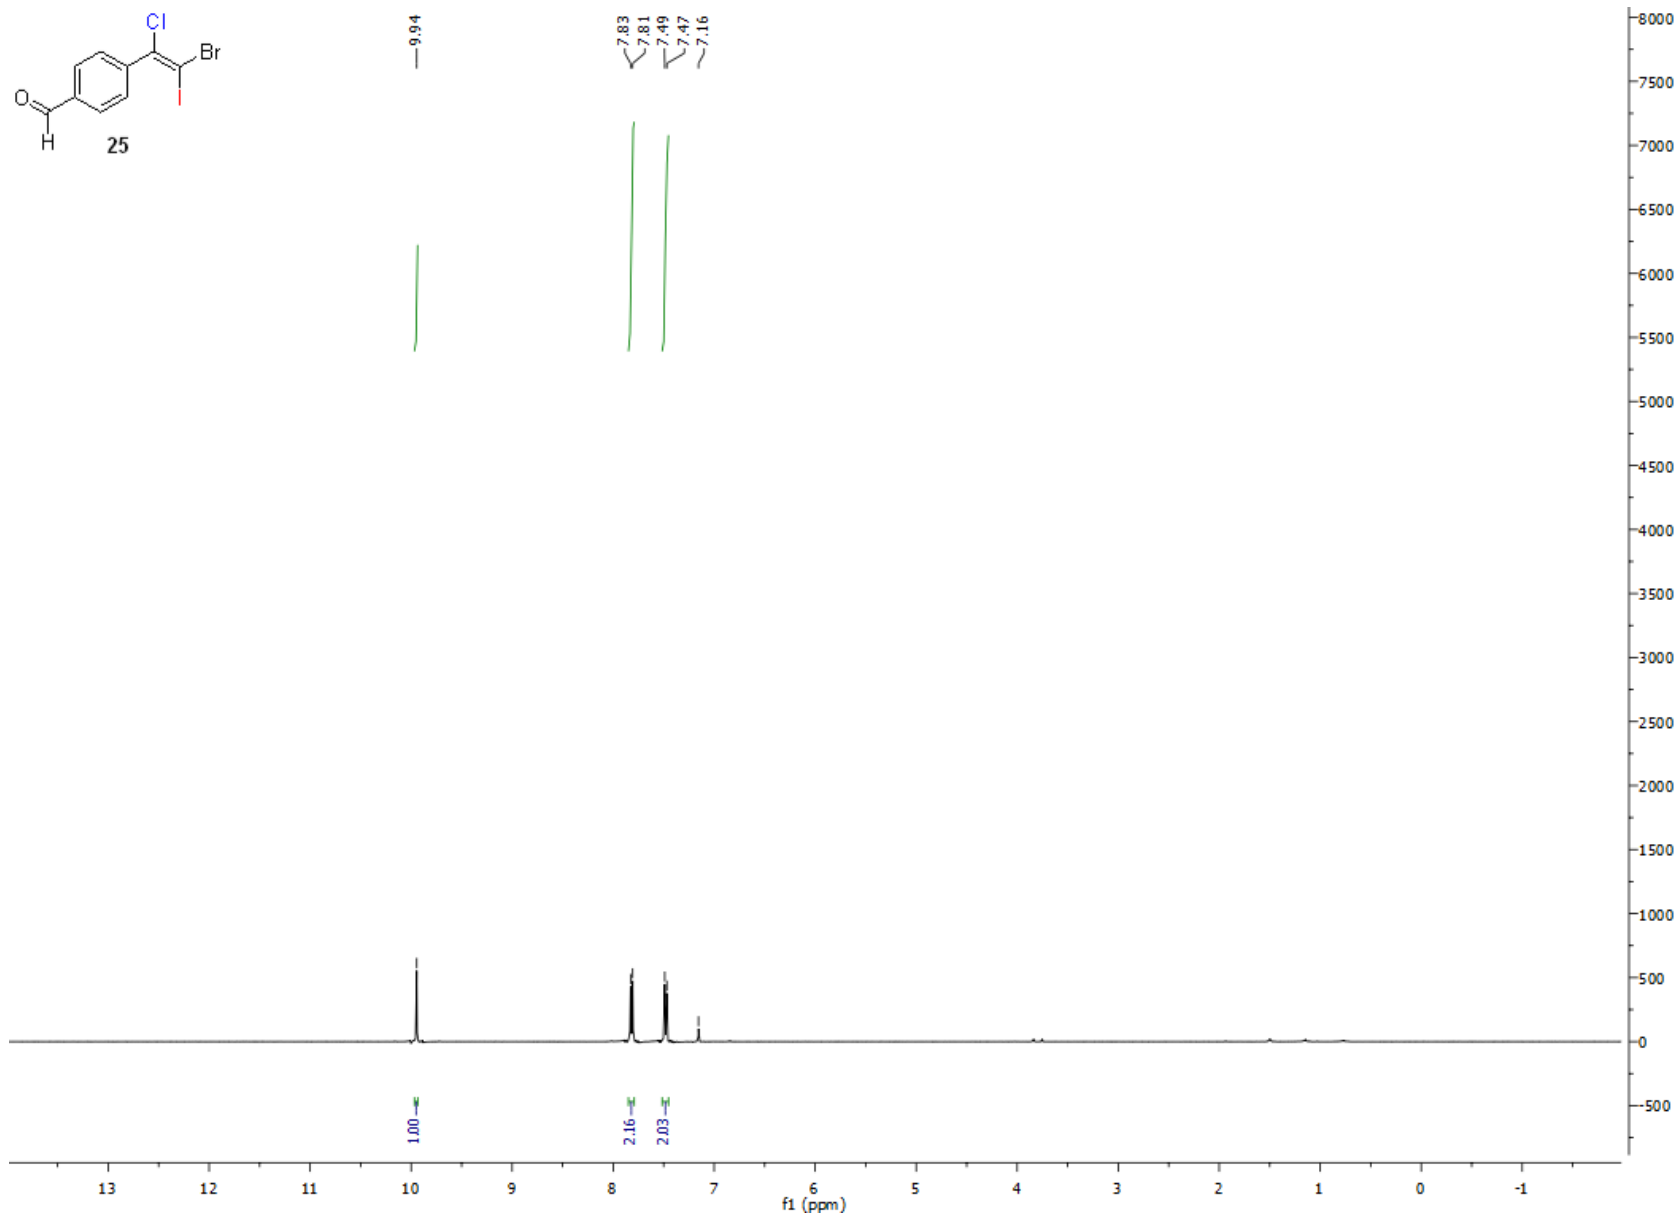



Figure S67.  $^{13}\text{C}$ -NMR of 25

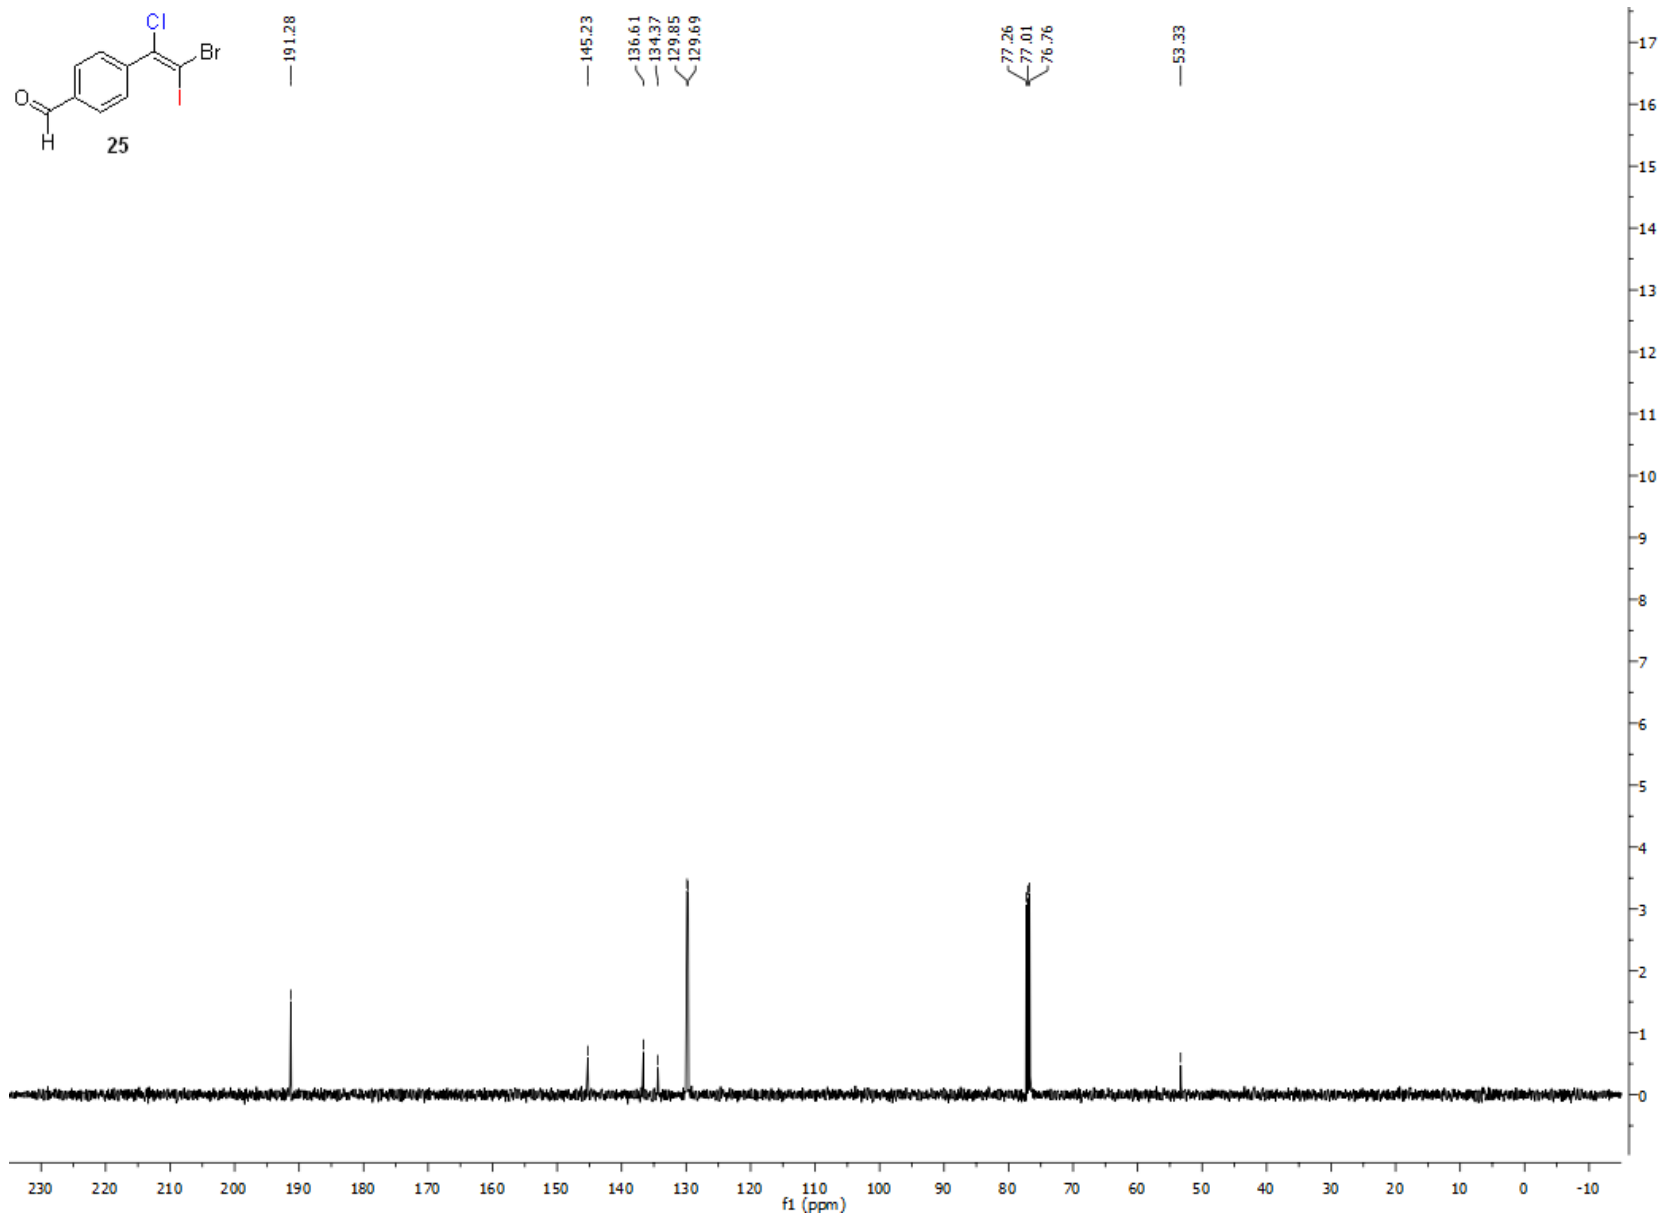

Figure S68. <sup>1</sup>H-NMR of 26

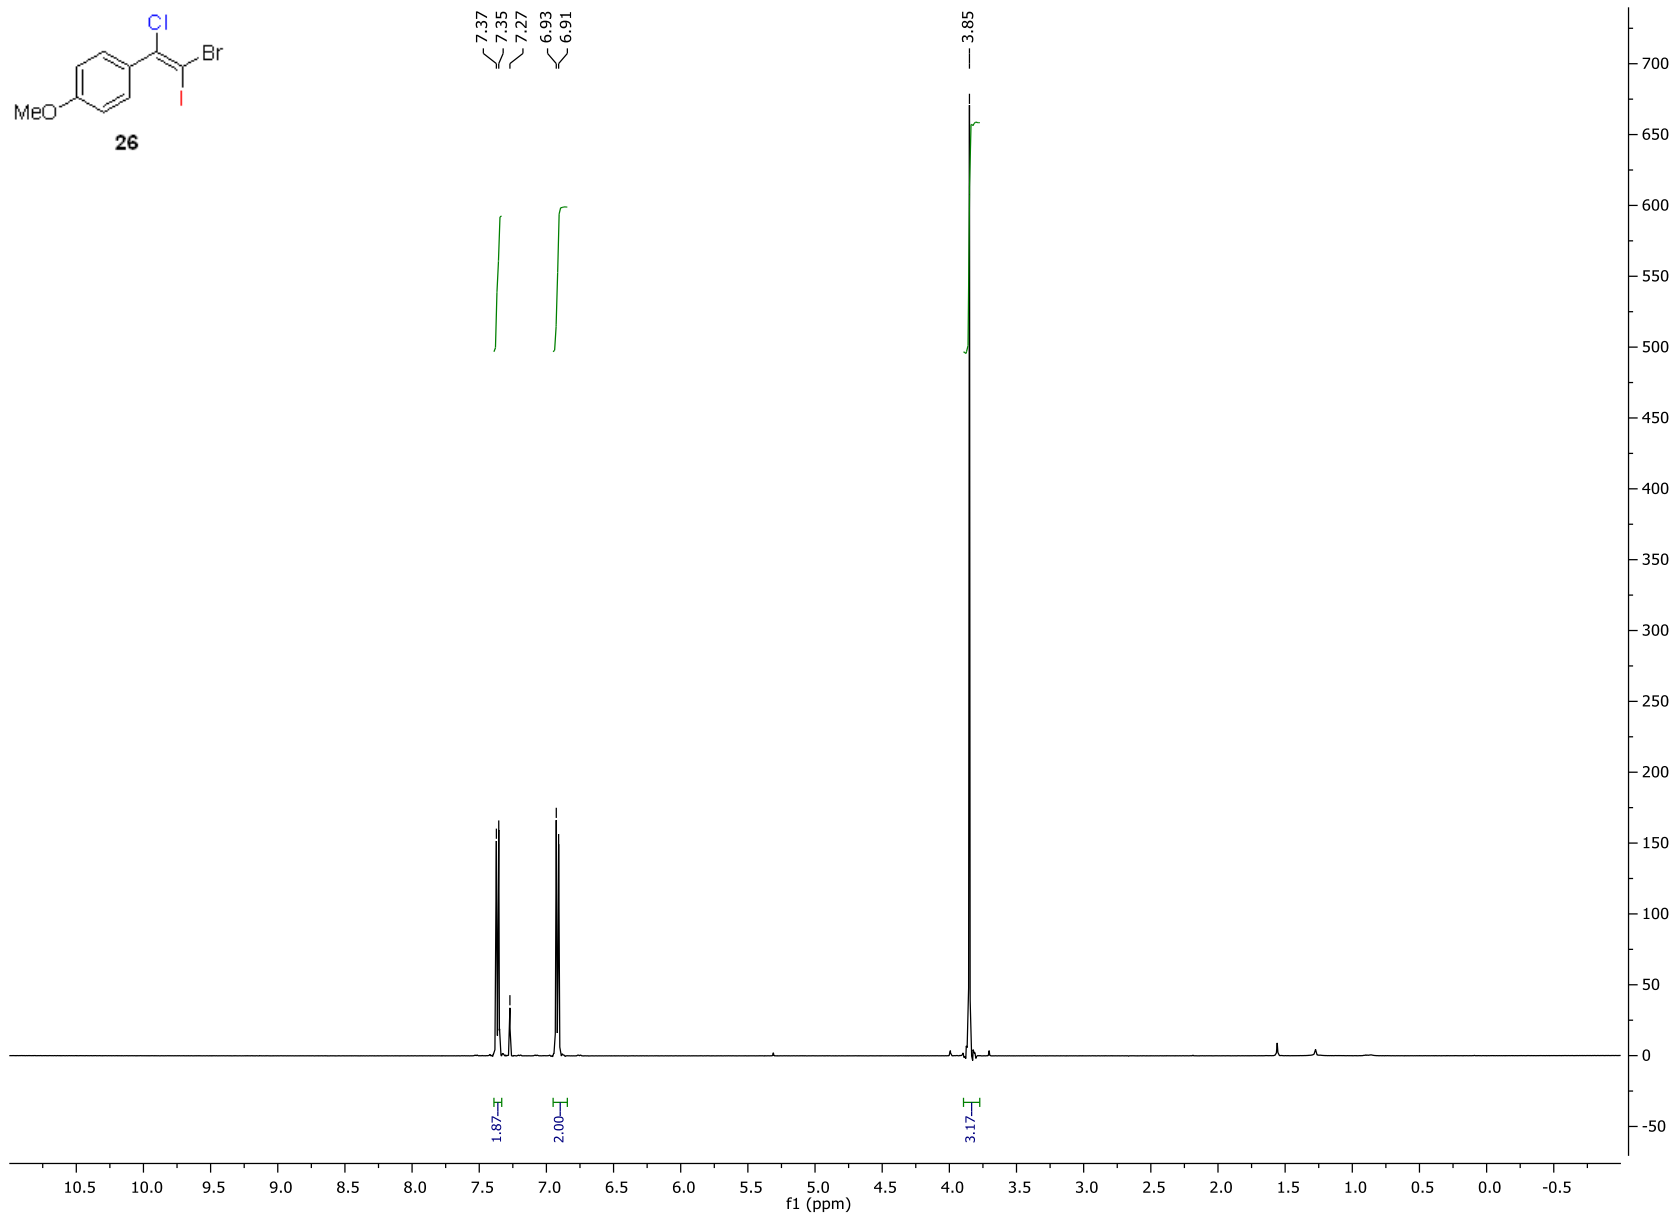

Figure S69.  $^{13}\text{C}$ -NMR of 26

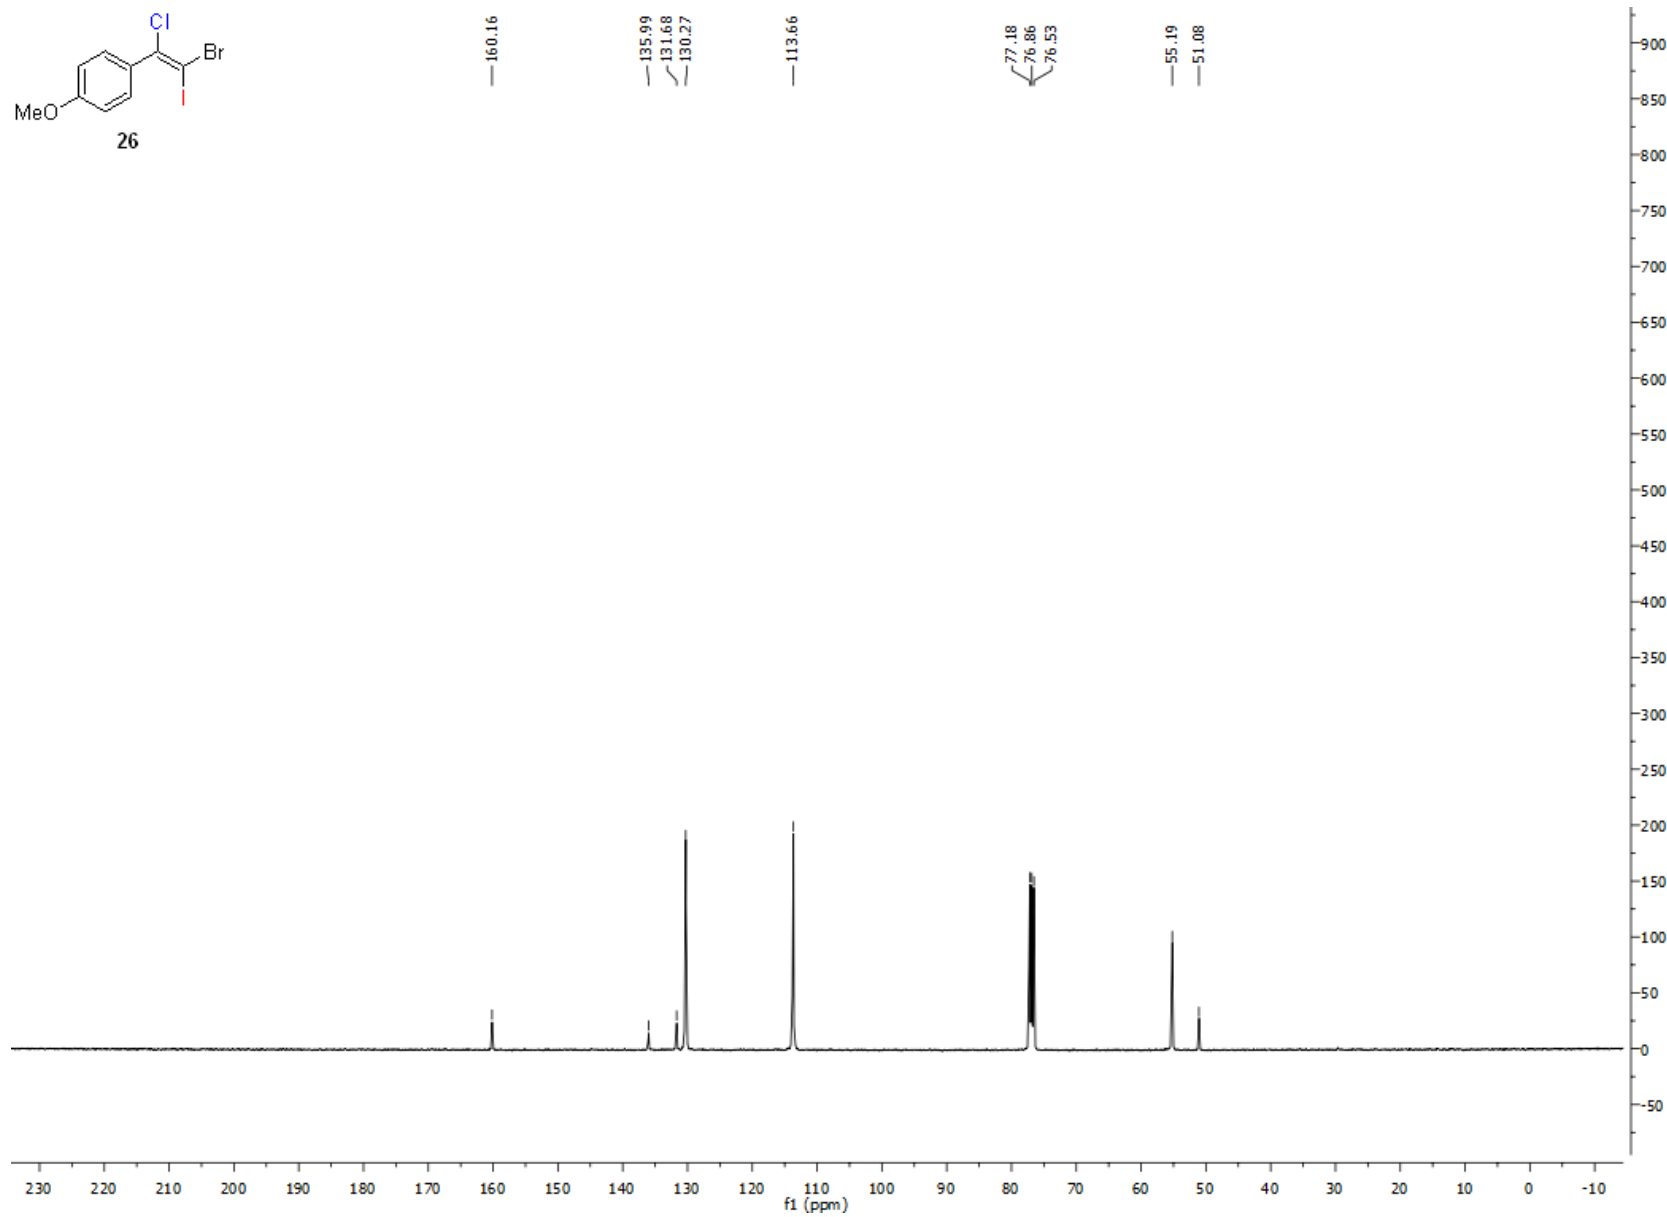

Figure S70. <sup>1</sup>H-NMR of 27

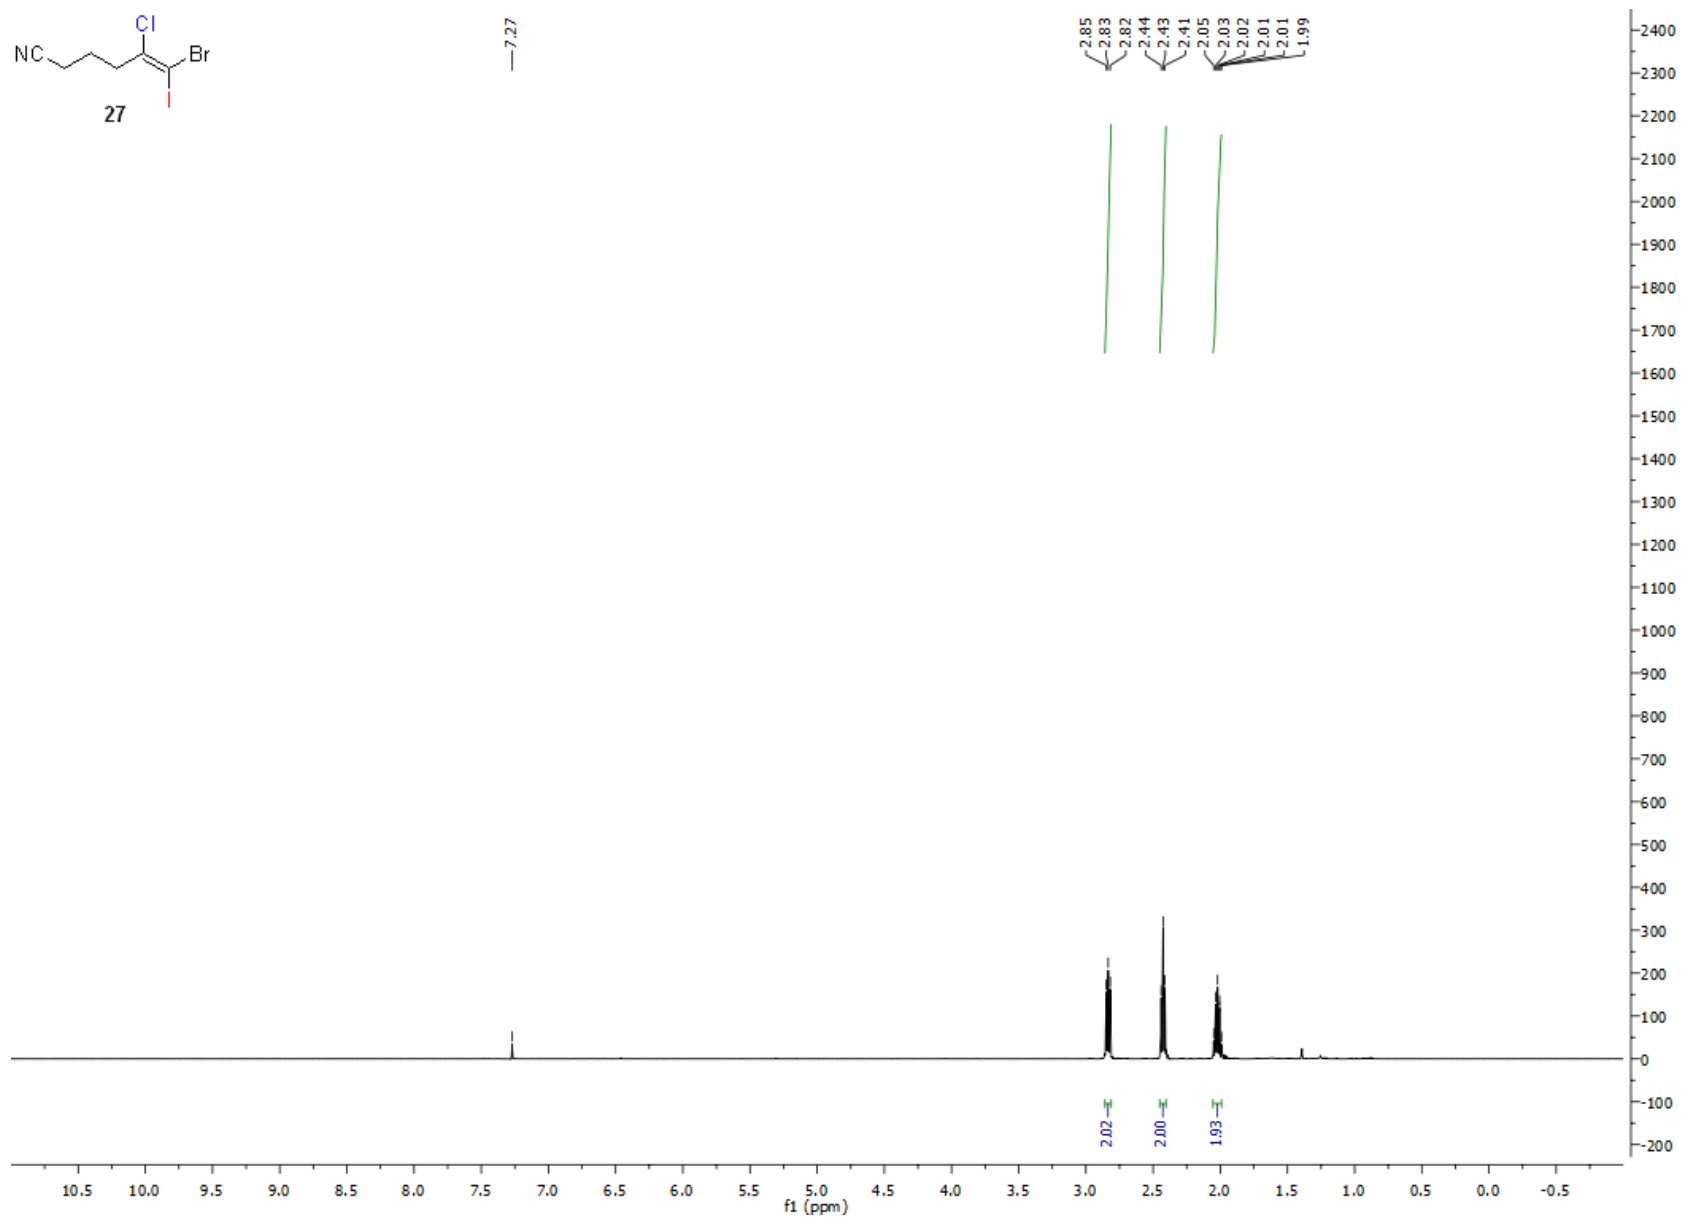

Figure S71.  $^{13}\text{C}$ -NMR of 27

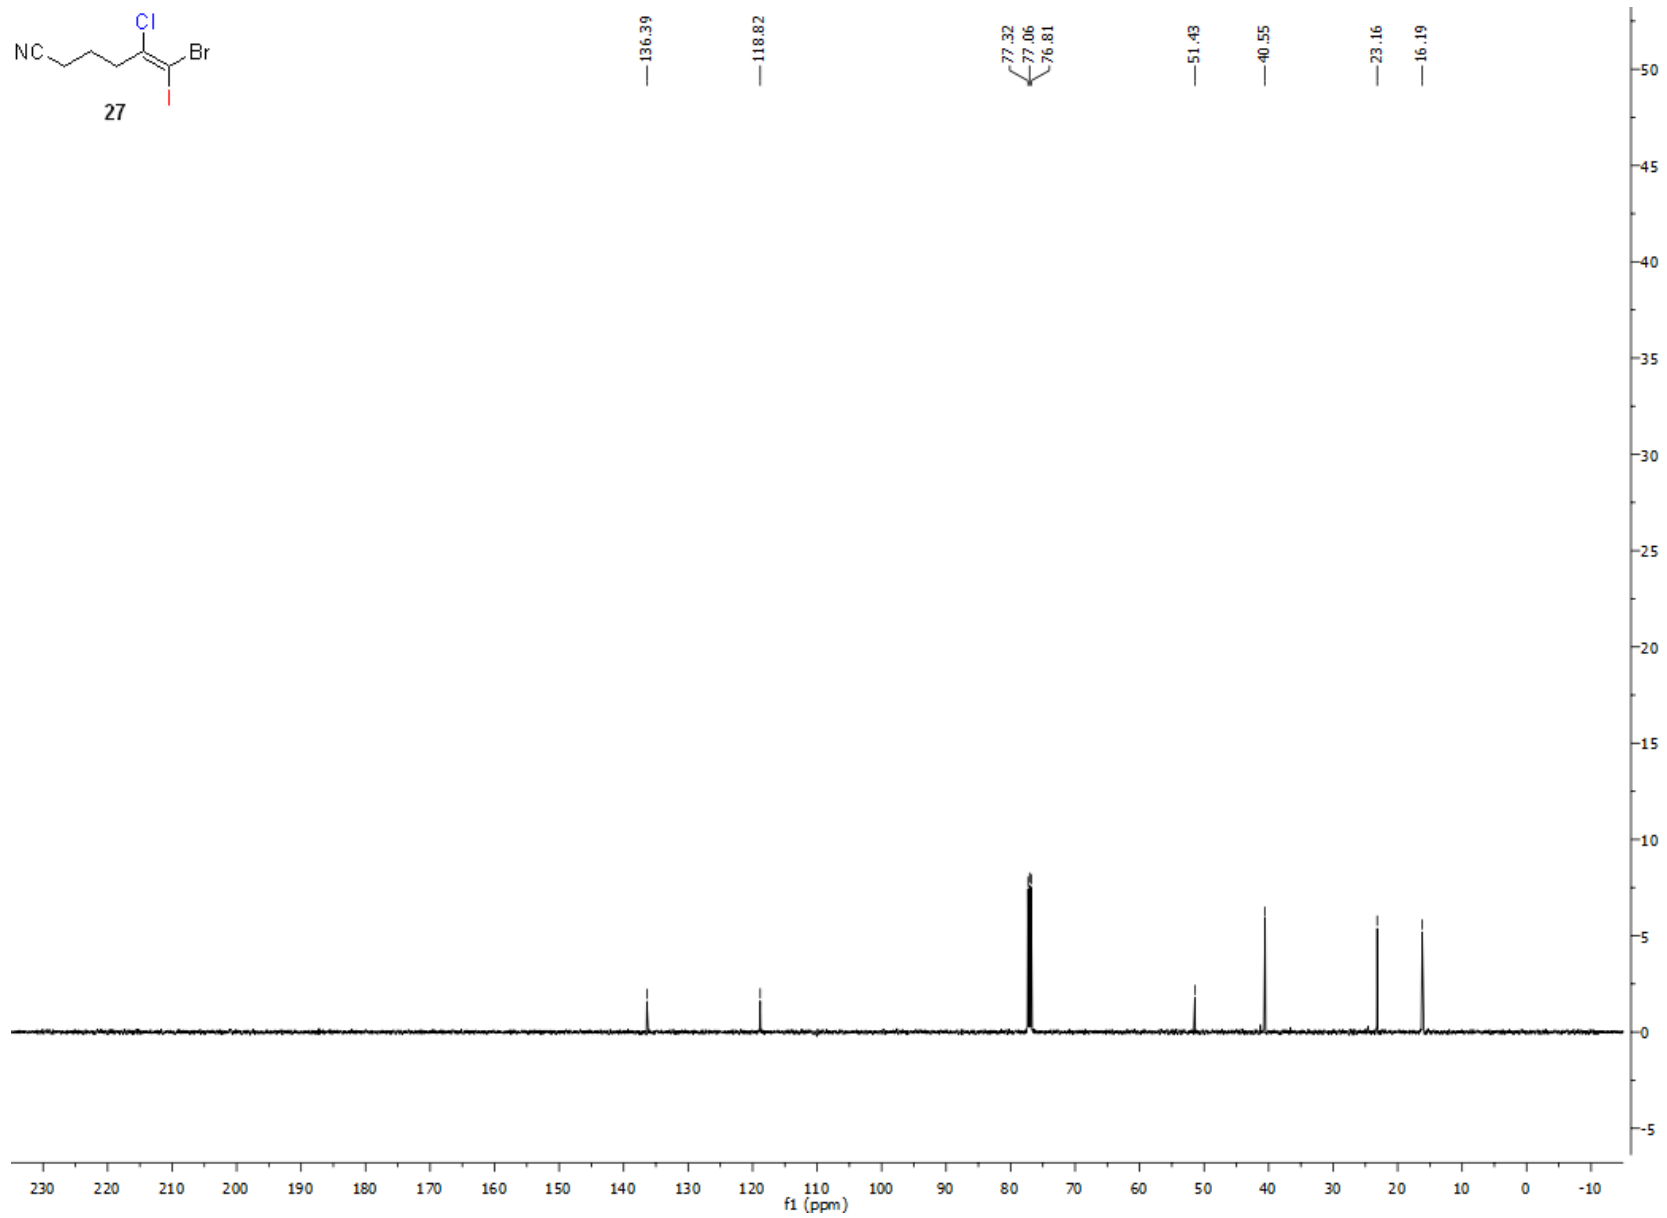

Figure S72.  $^1\text{H-NMR}$  of 28

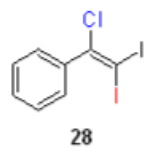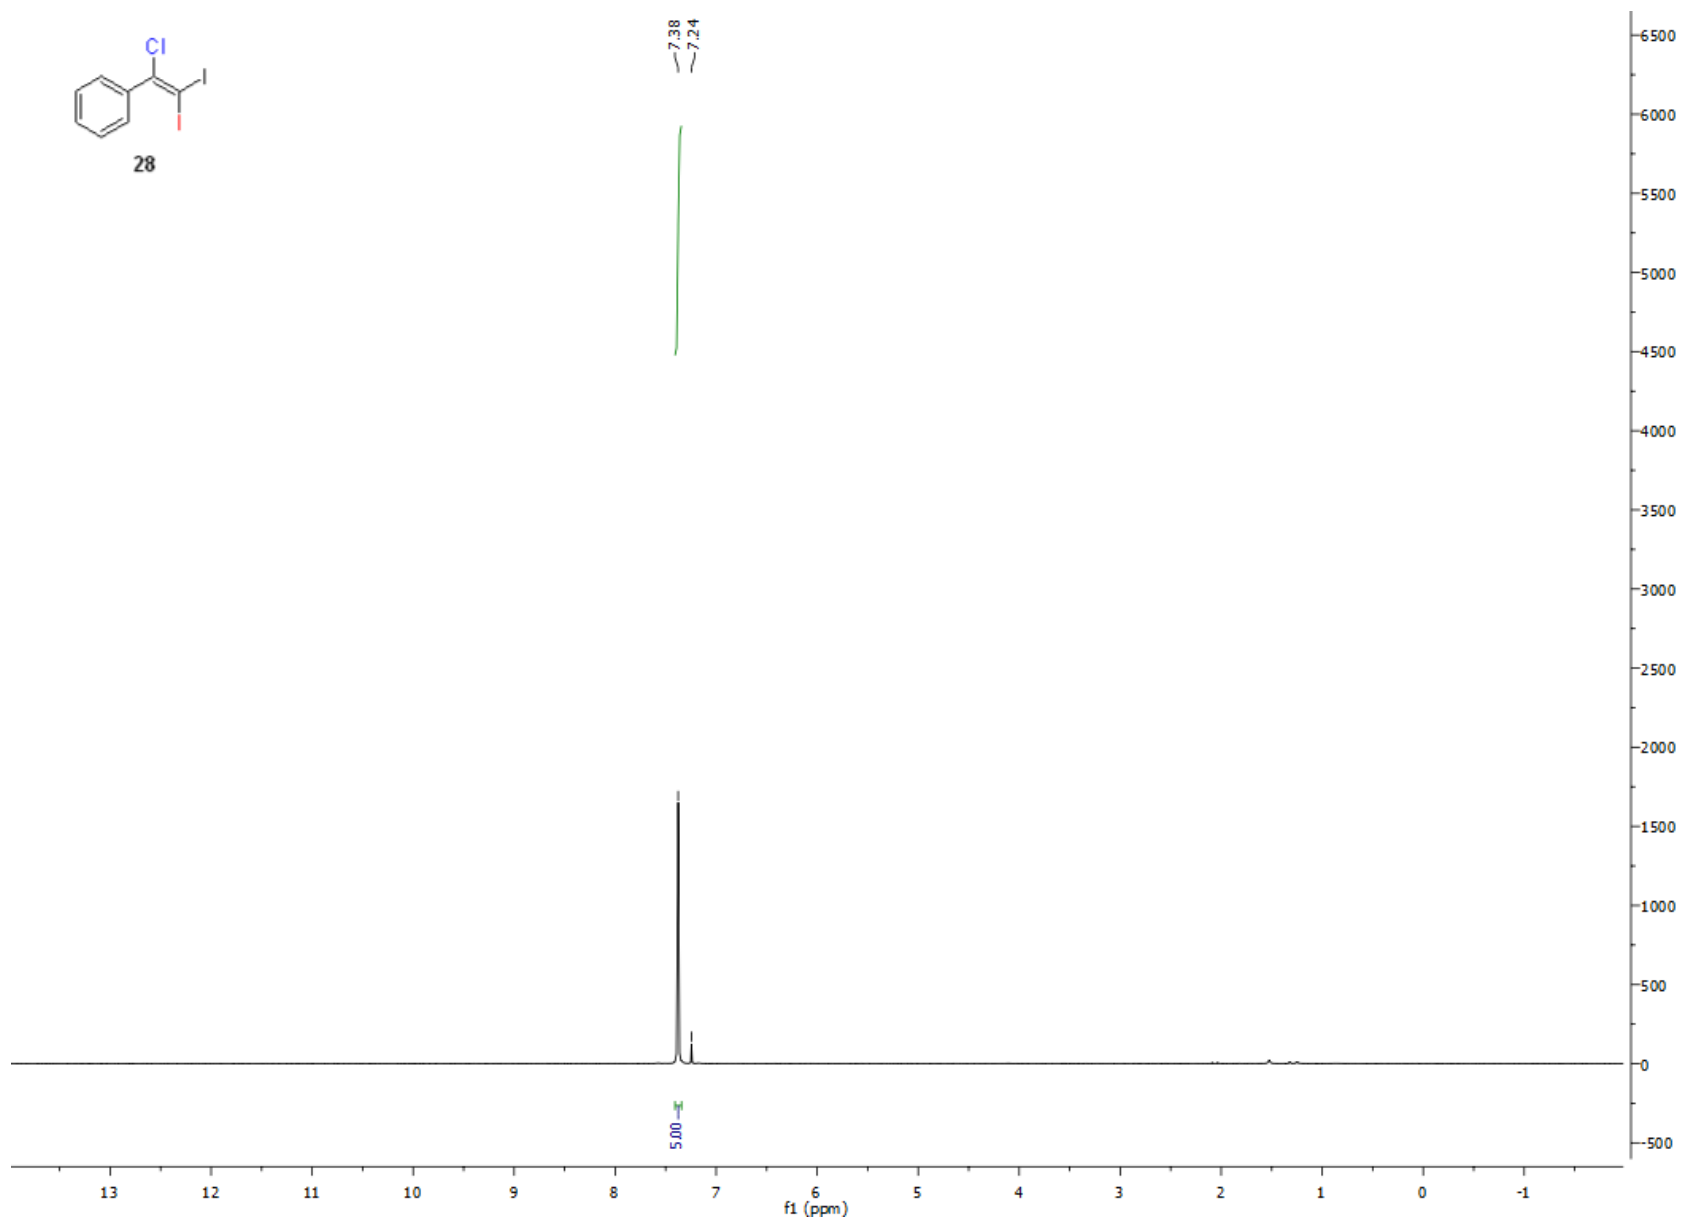

Figure S73. <sup>13</sup>C-NMR of 28

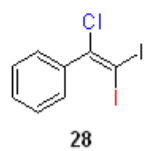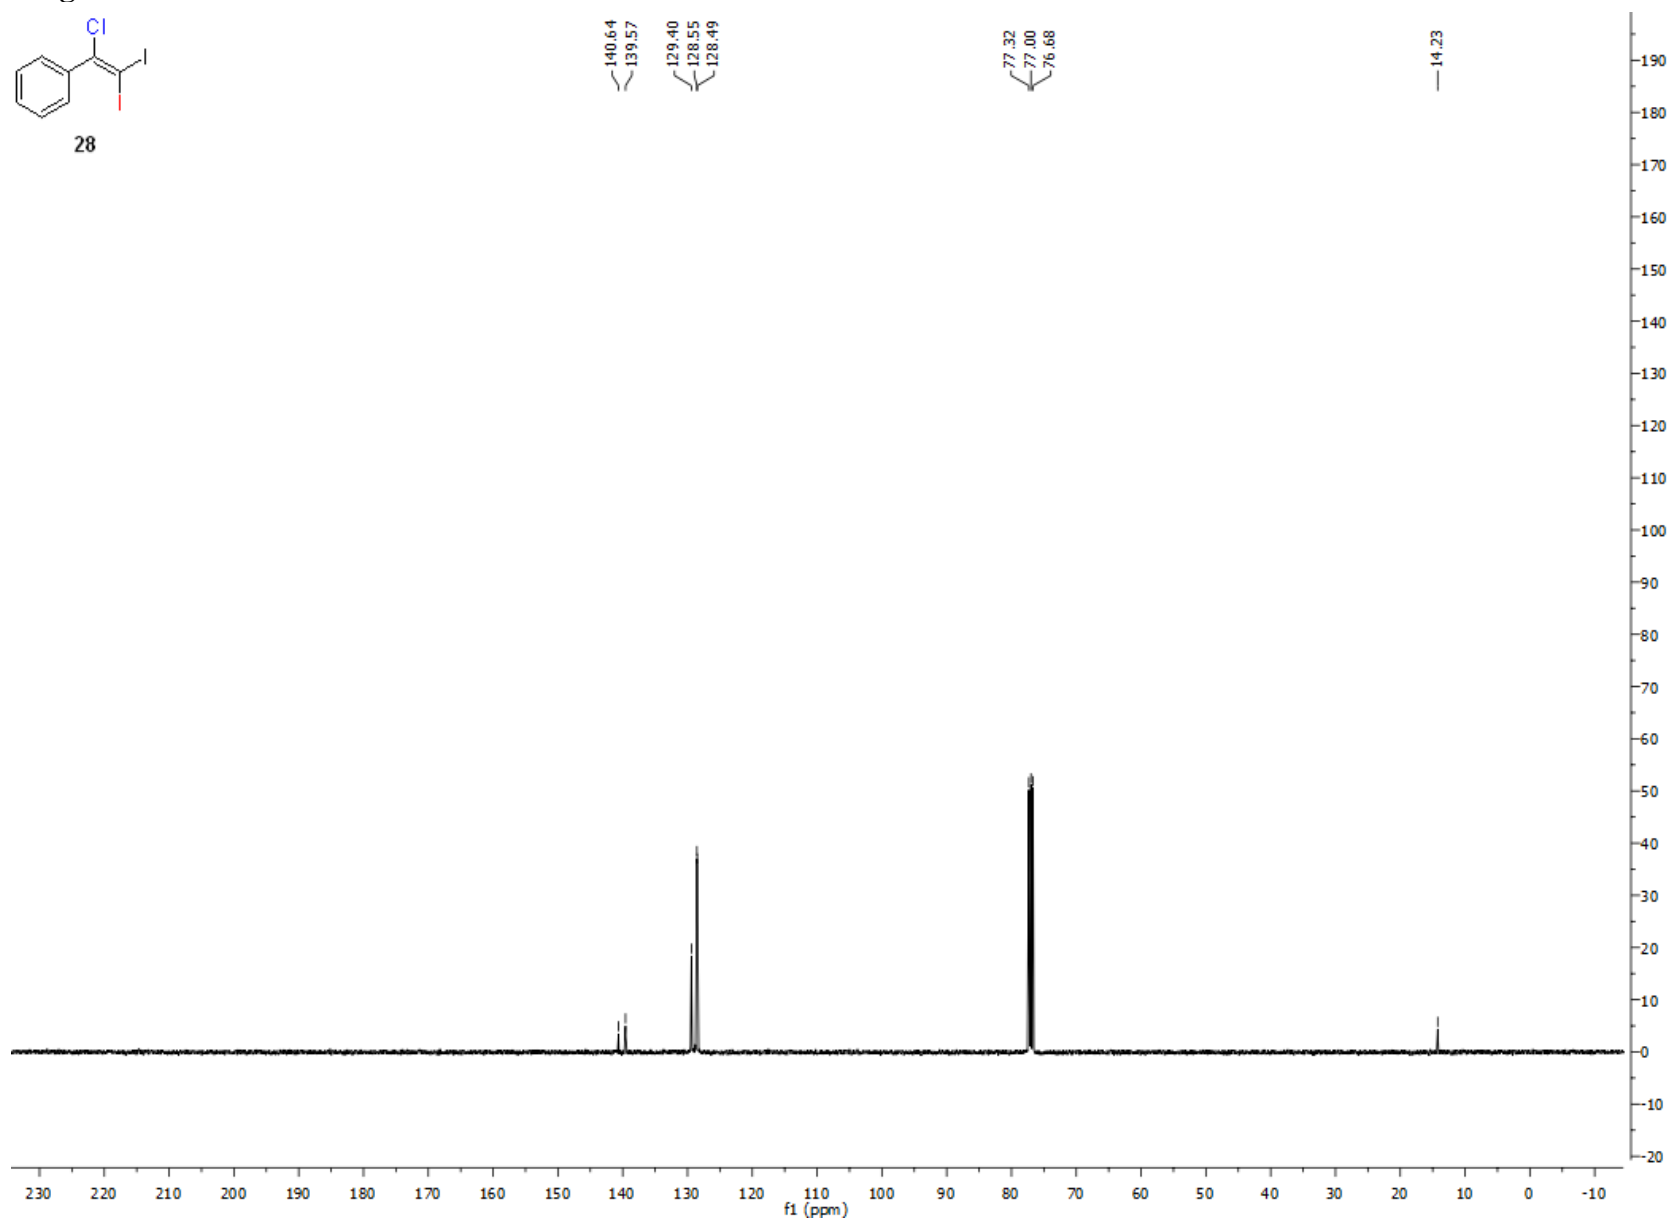

Figure S74. <sup>1</sup>H-NMR of 29

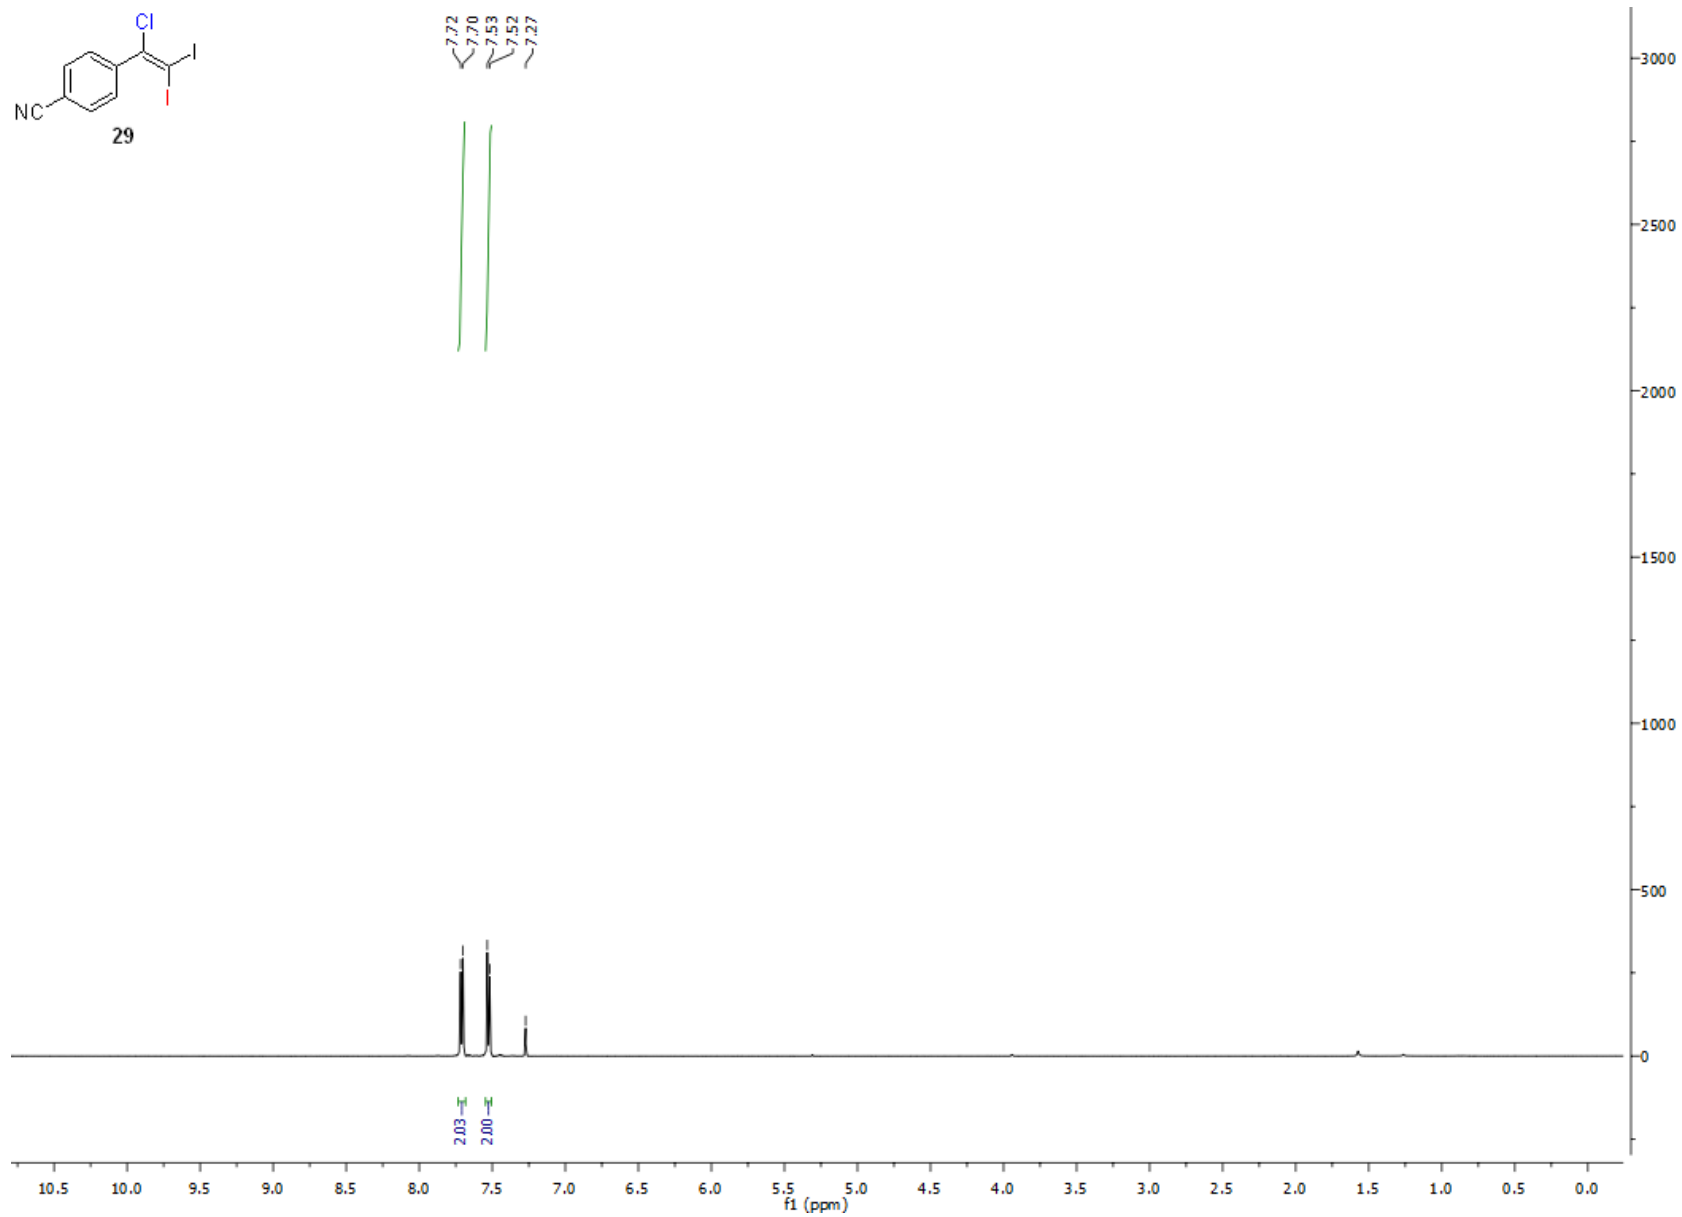



Figure S75.  $^{13}\text{C}$ -NMR of **29**

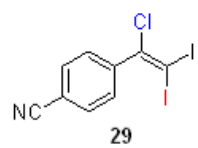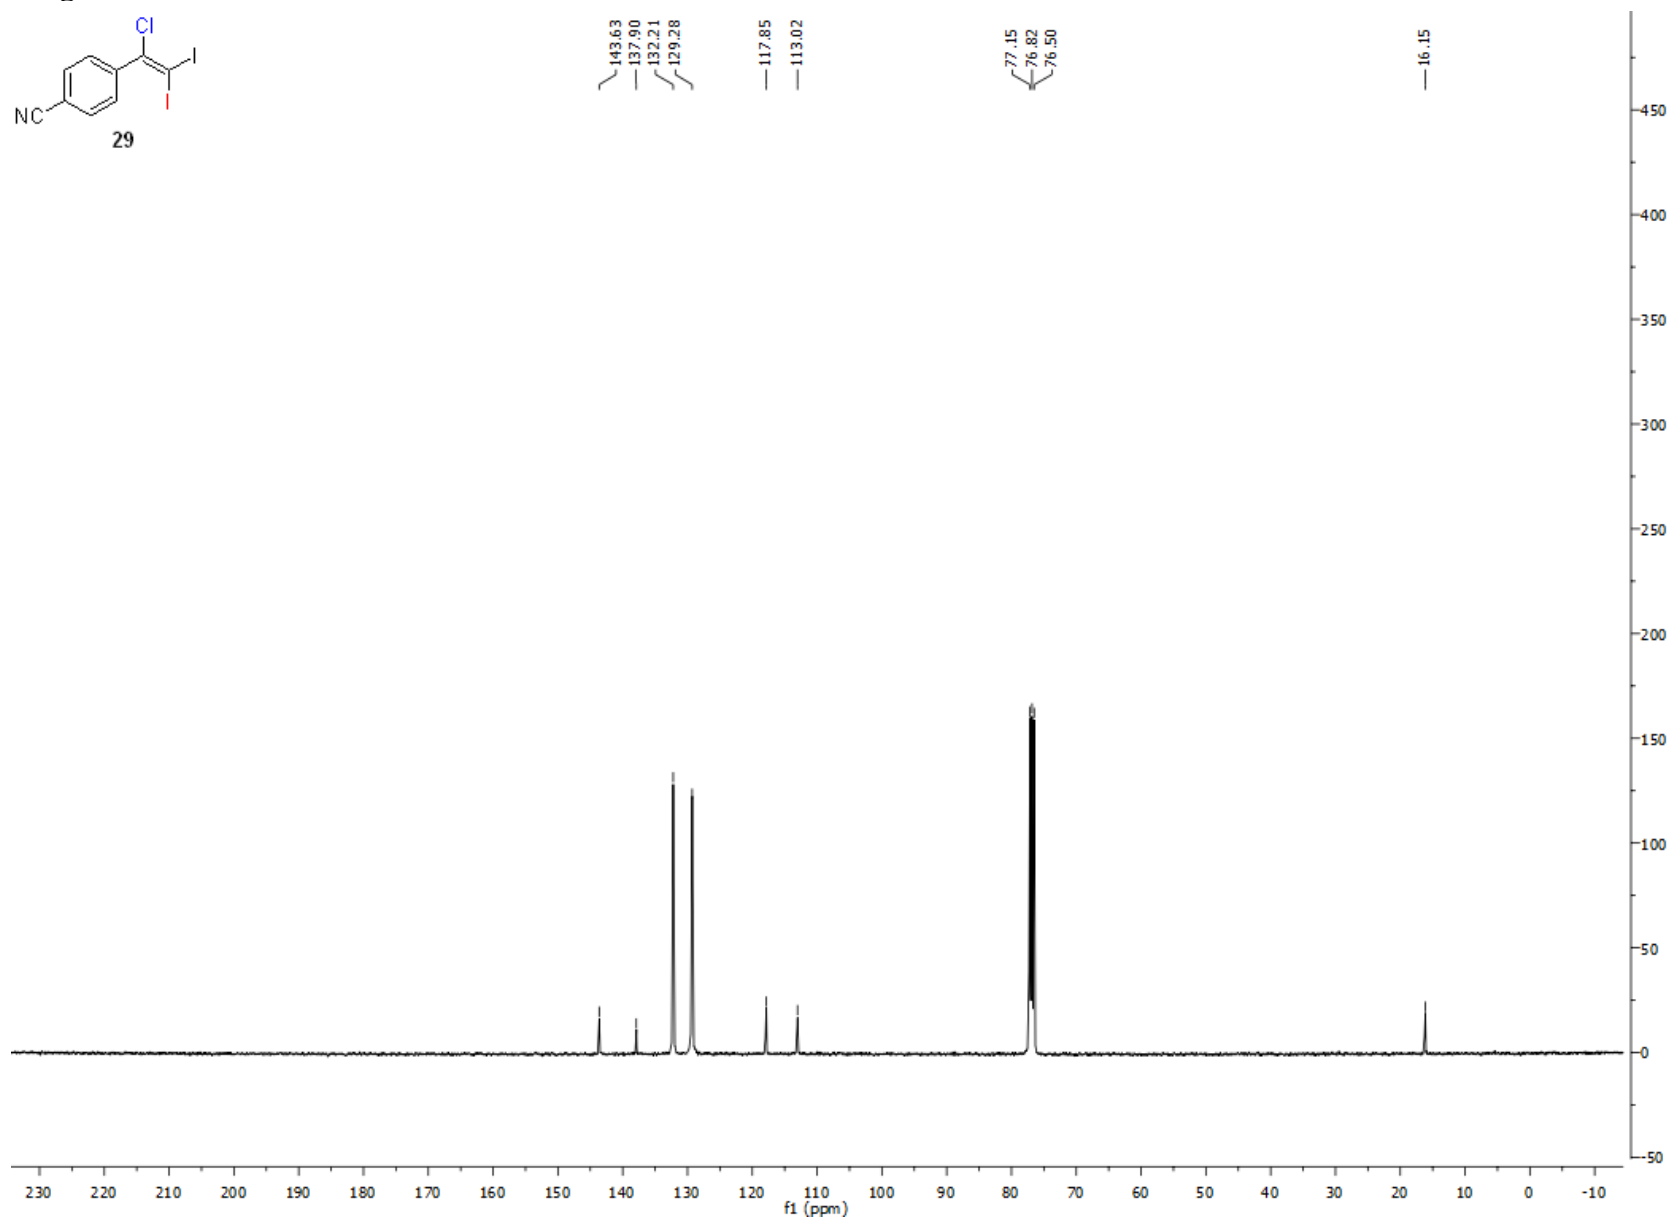

Figure S76. <sup>1</sup>H-NMR of 30

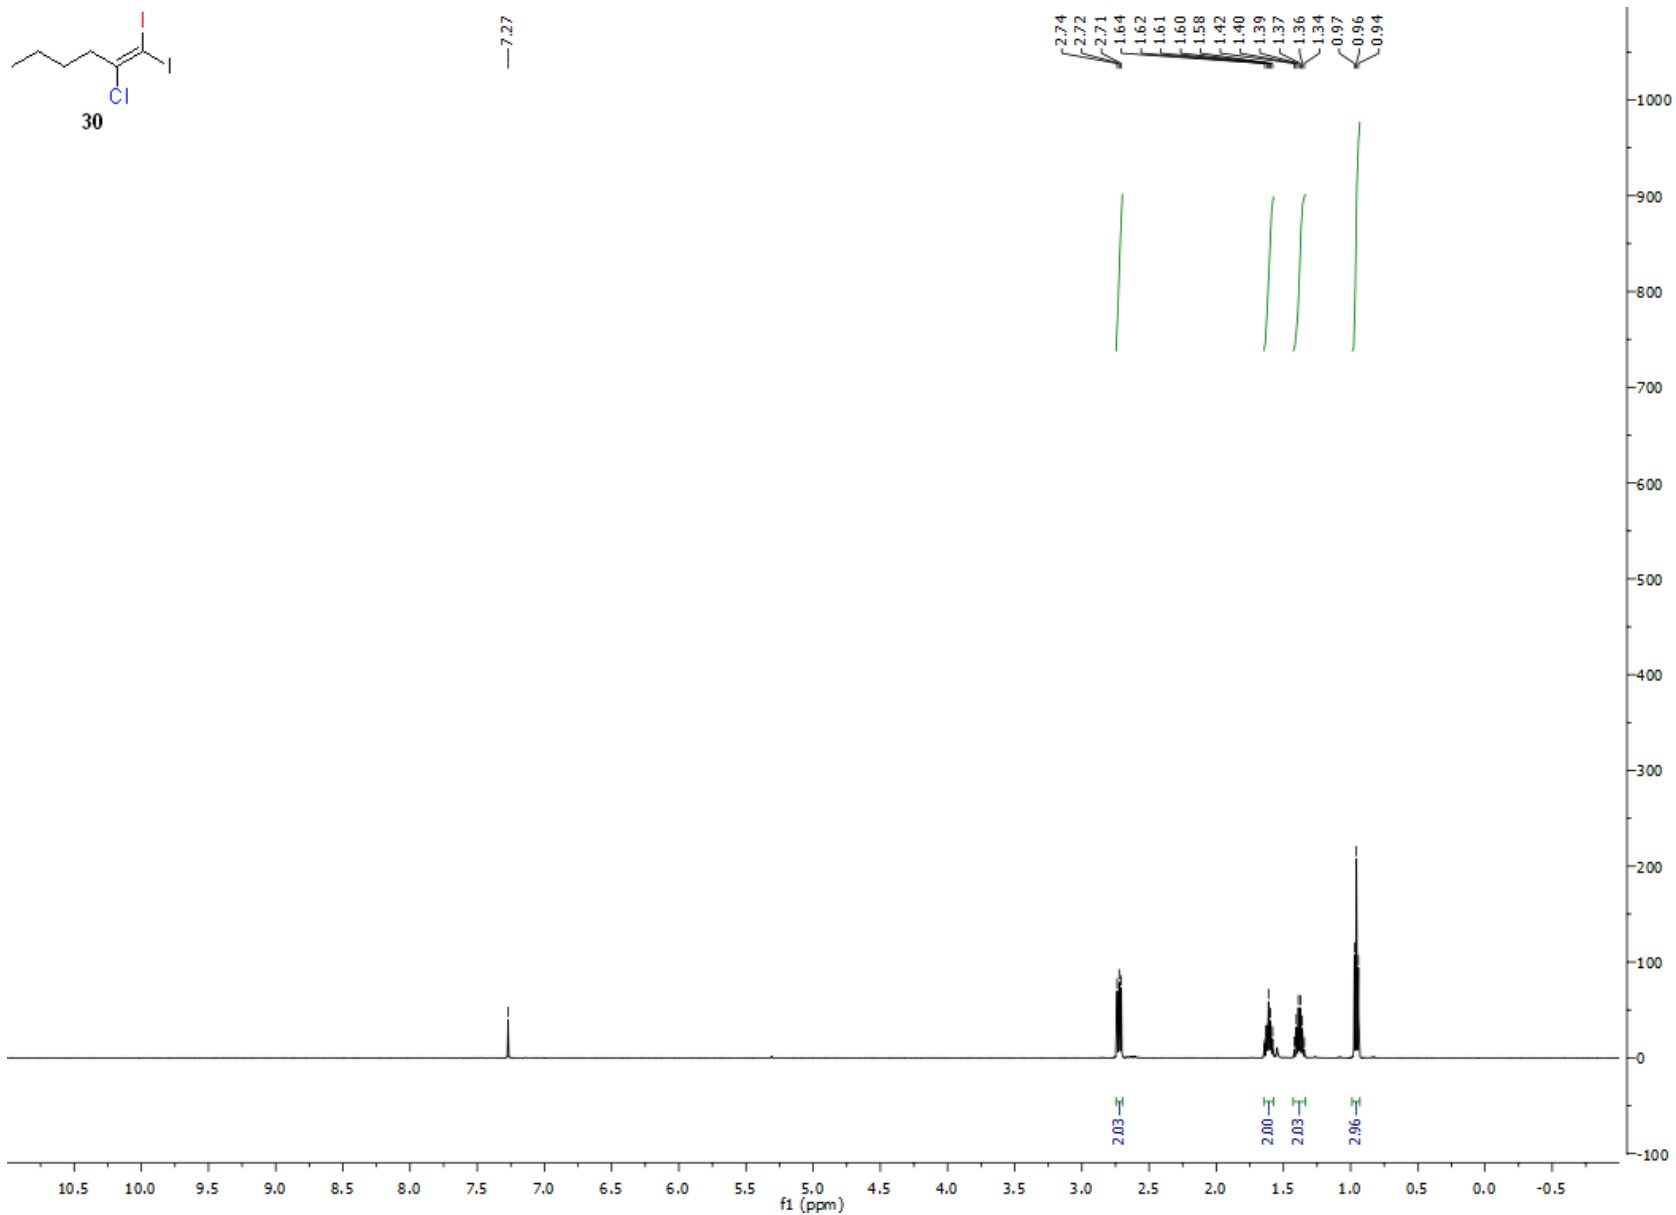

Figure S77.  $^{13}\text{C}$ -NMR of 30

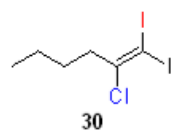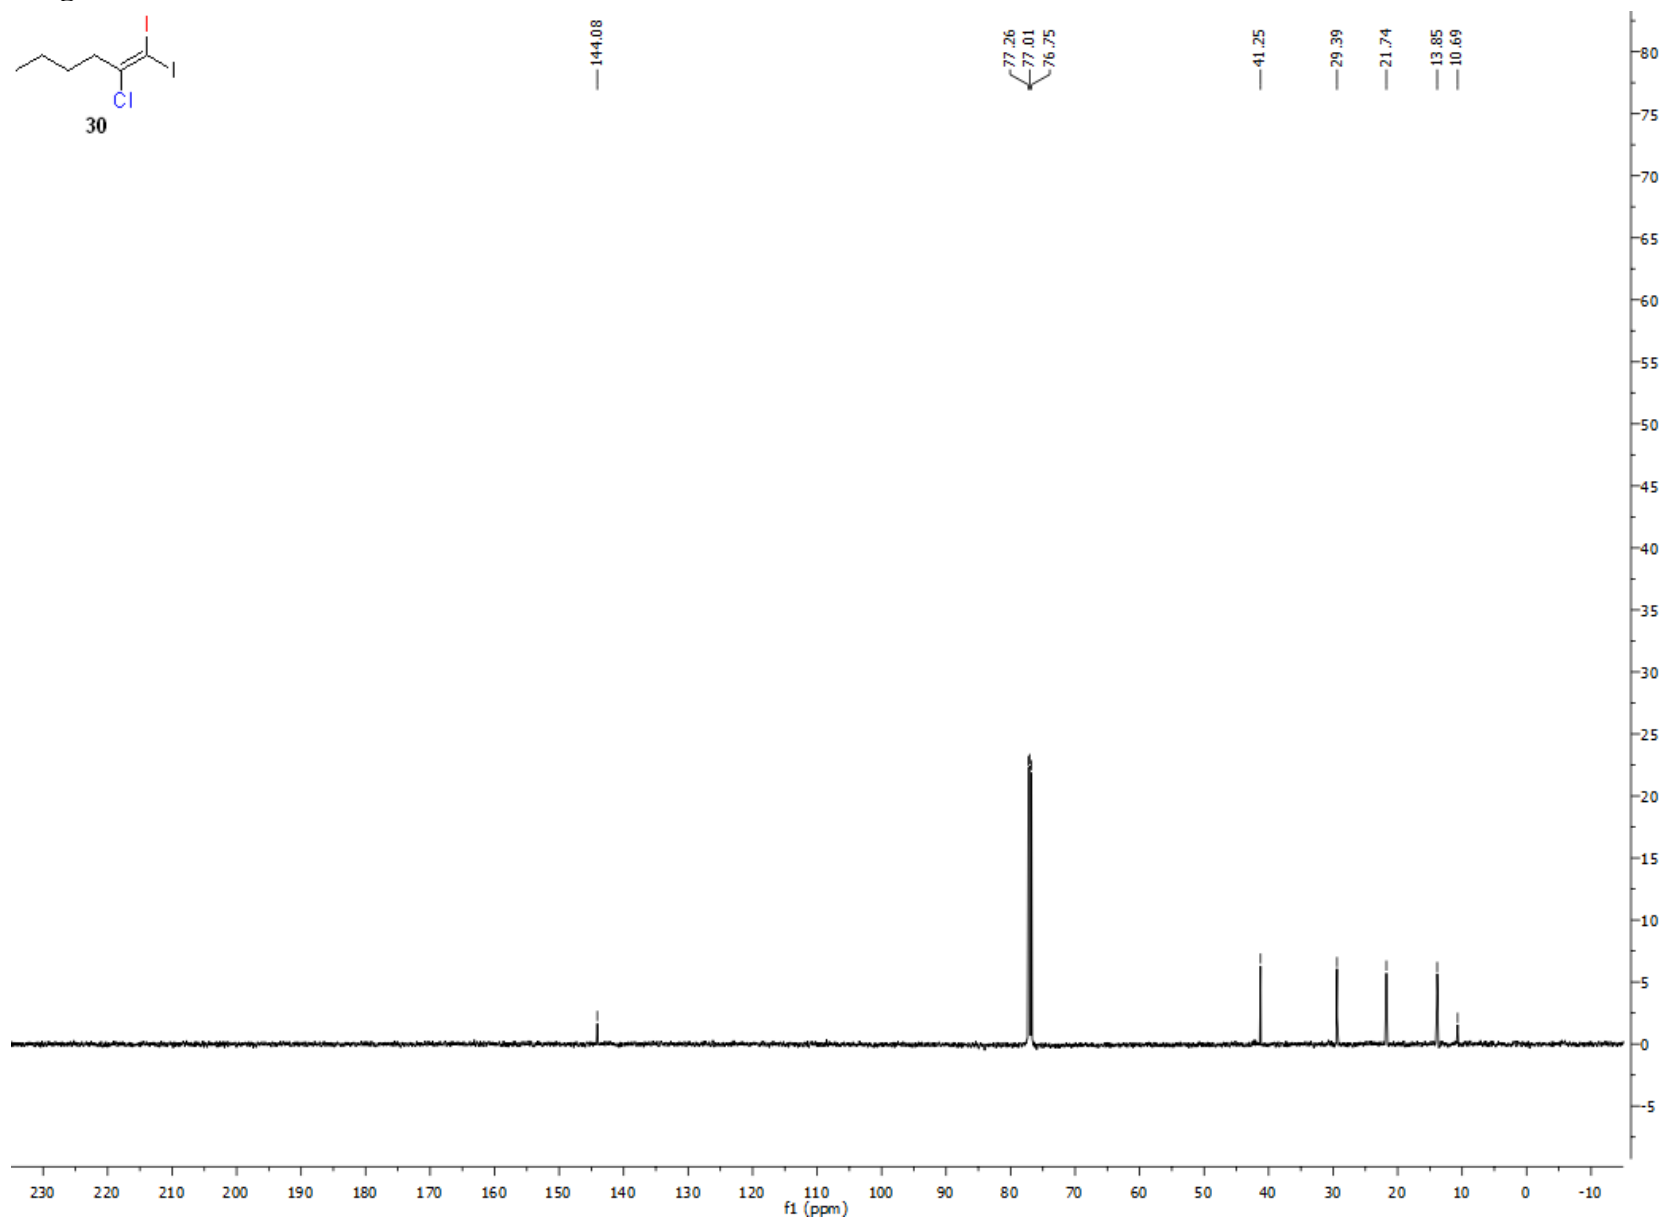

Figure S78. <sup>1</sup>H-NMR of 31

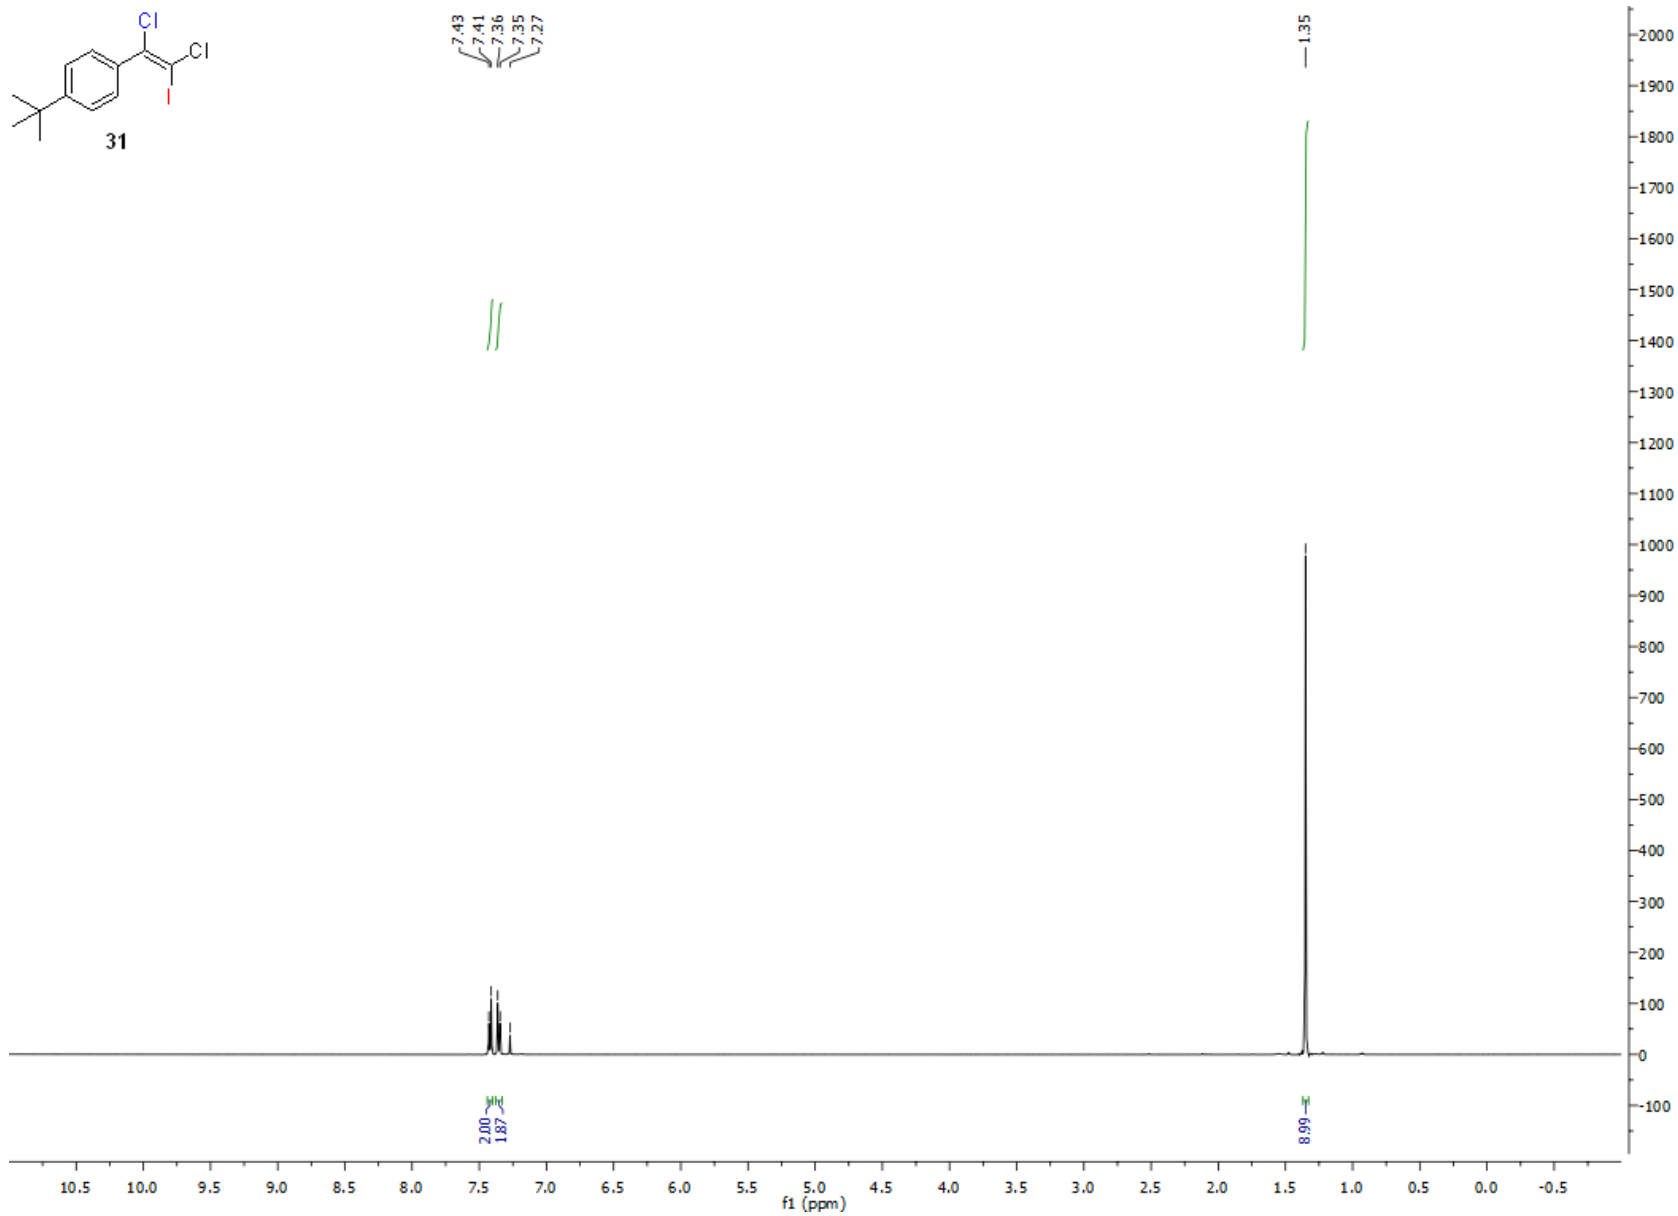

Figure S79.  $^{13}\text{C}$ -NMR of 31

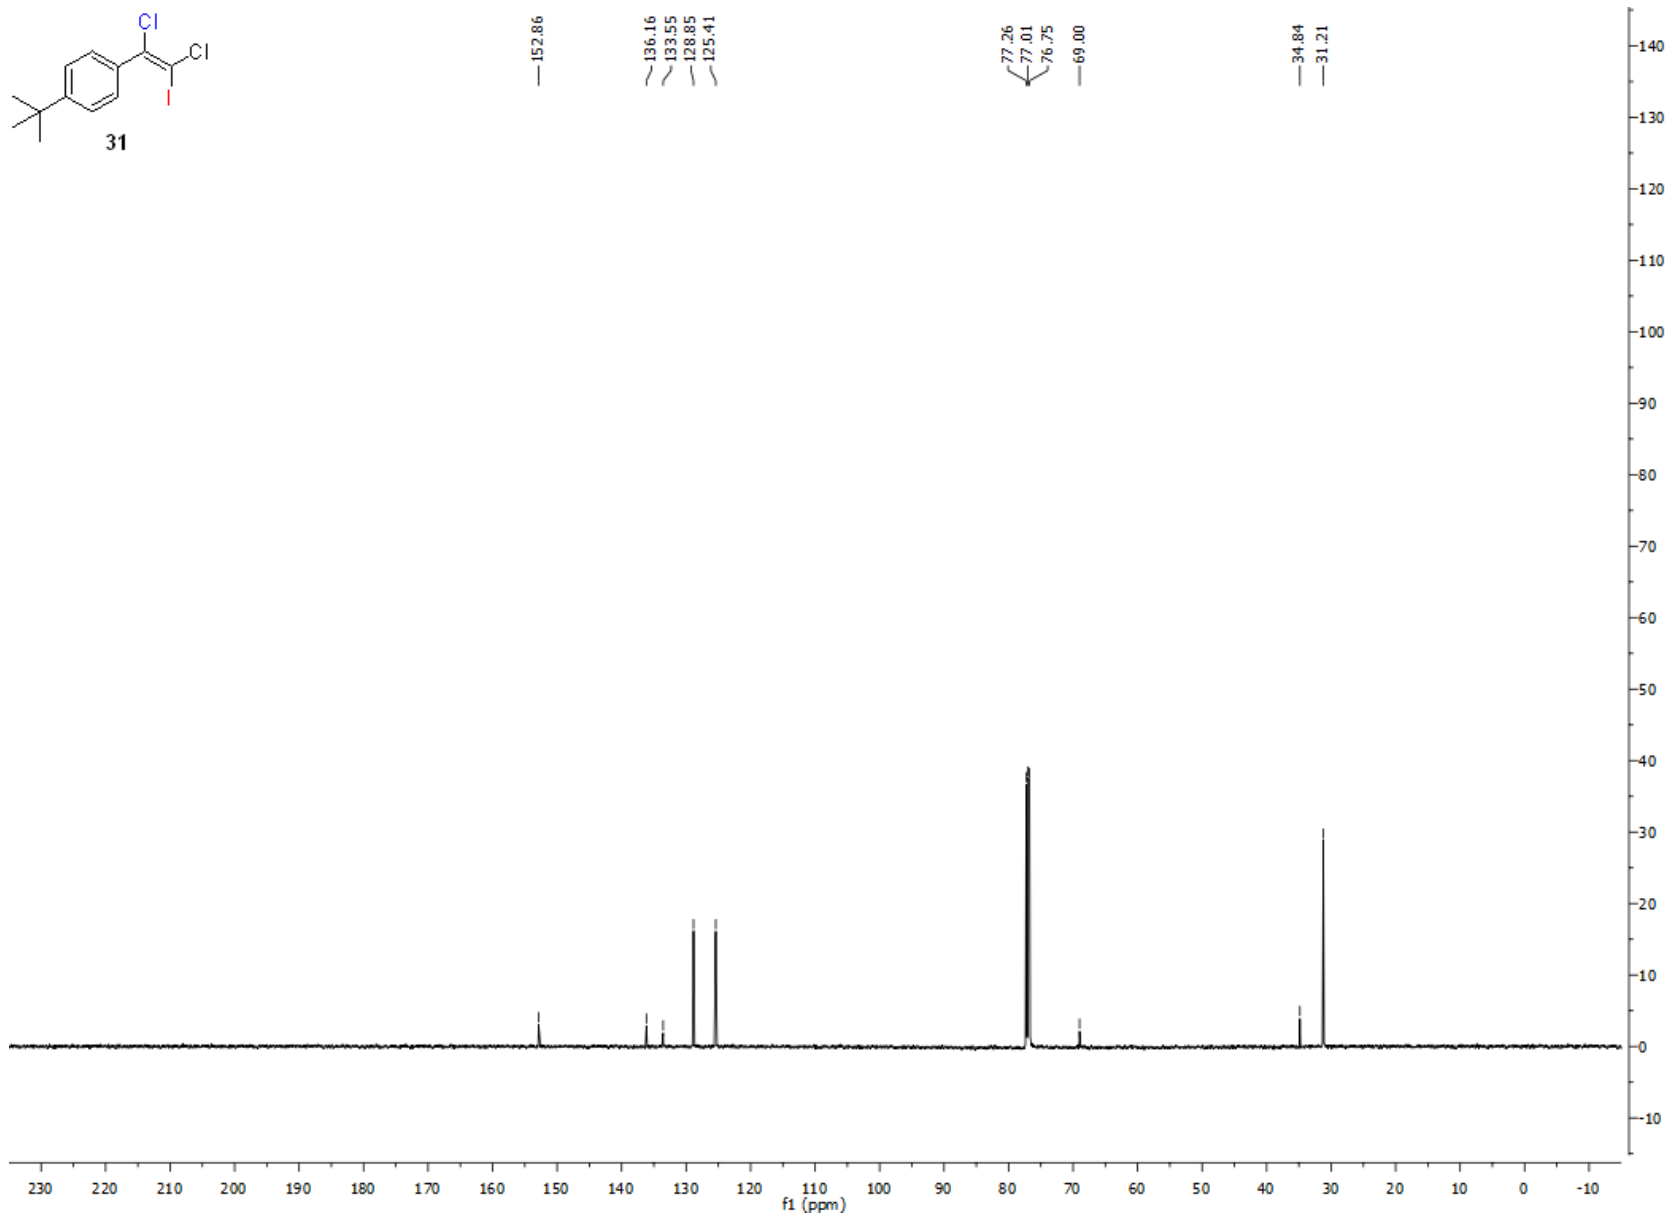

Figure S80.  $^1\text{H-NMR}$  of **32**

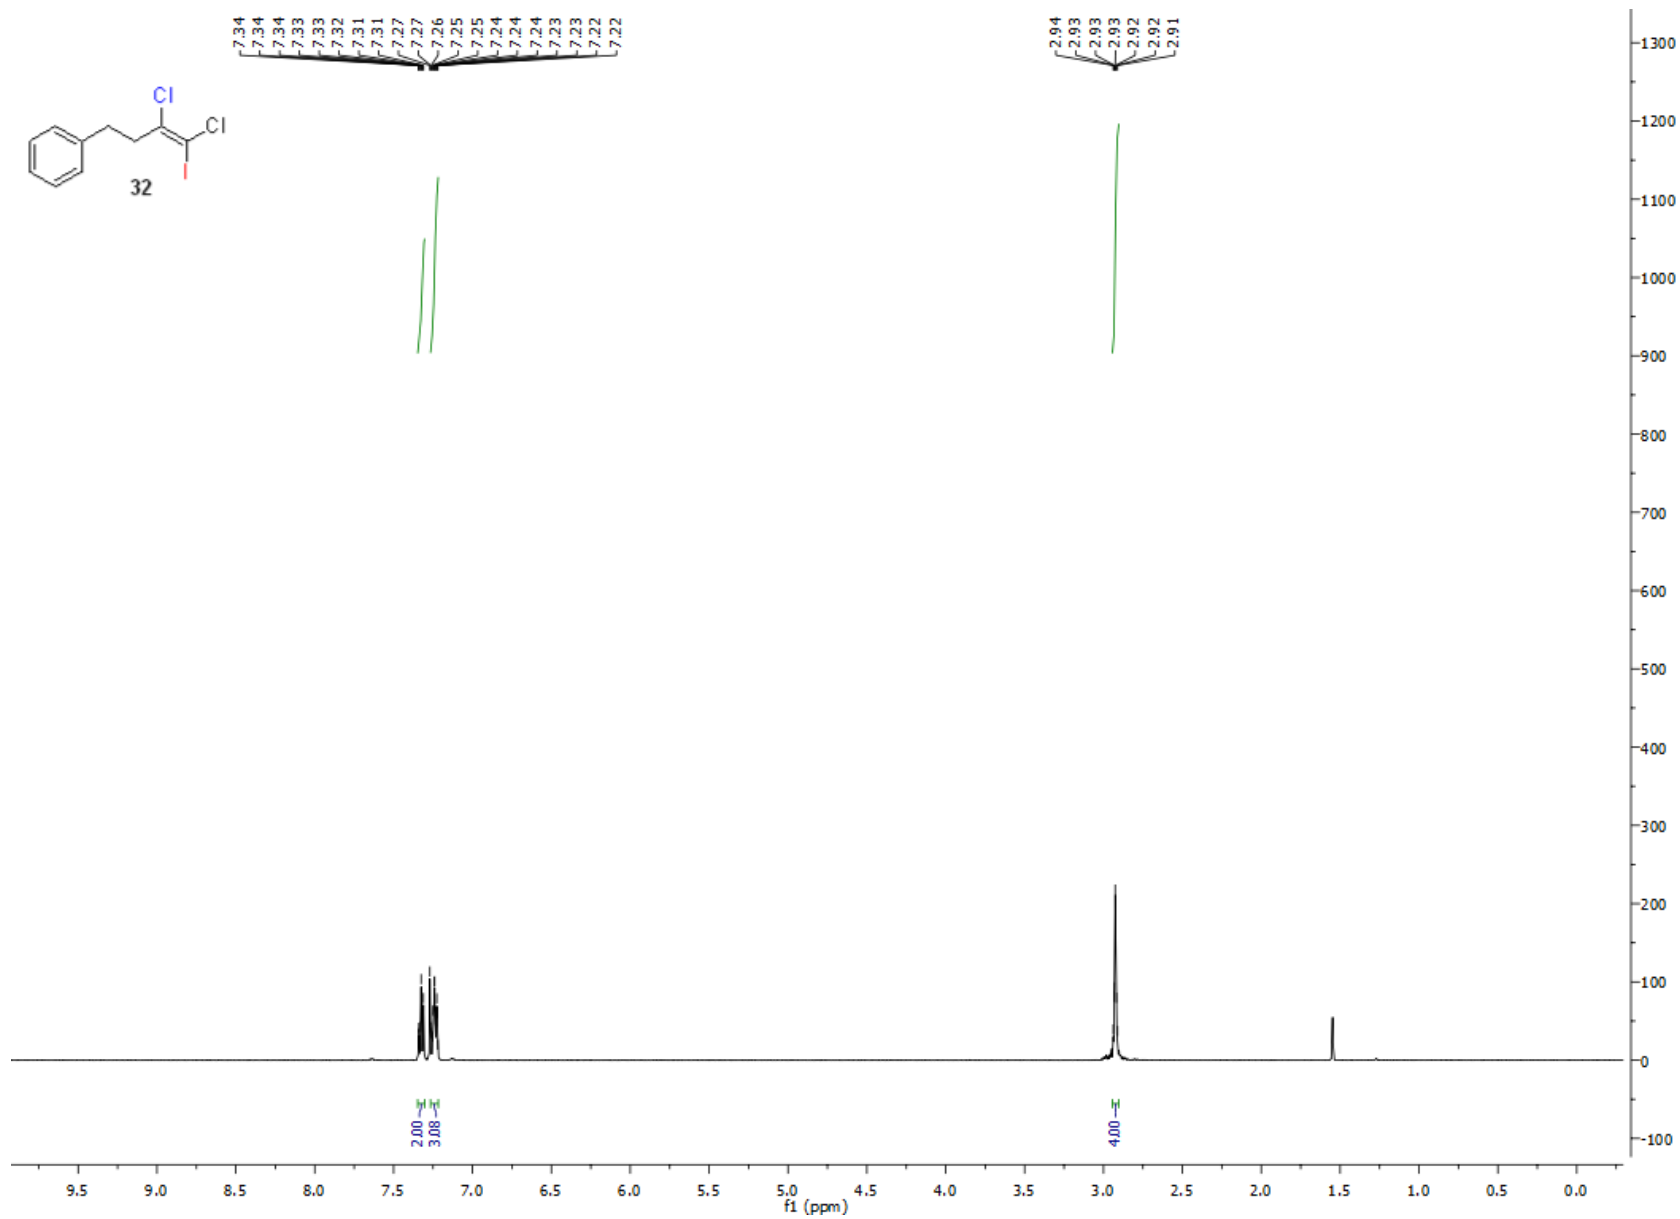

Figure S81.  $^{13}\text{C}$ -NMR of 32

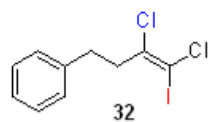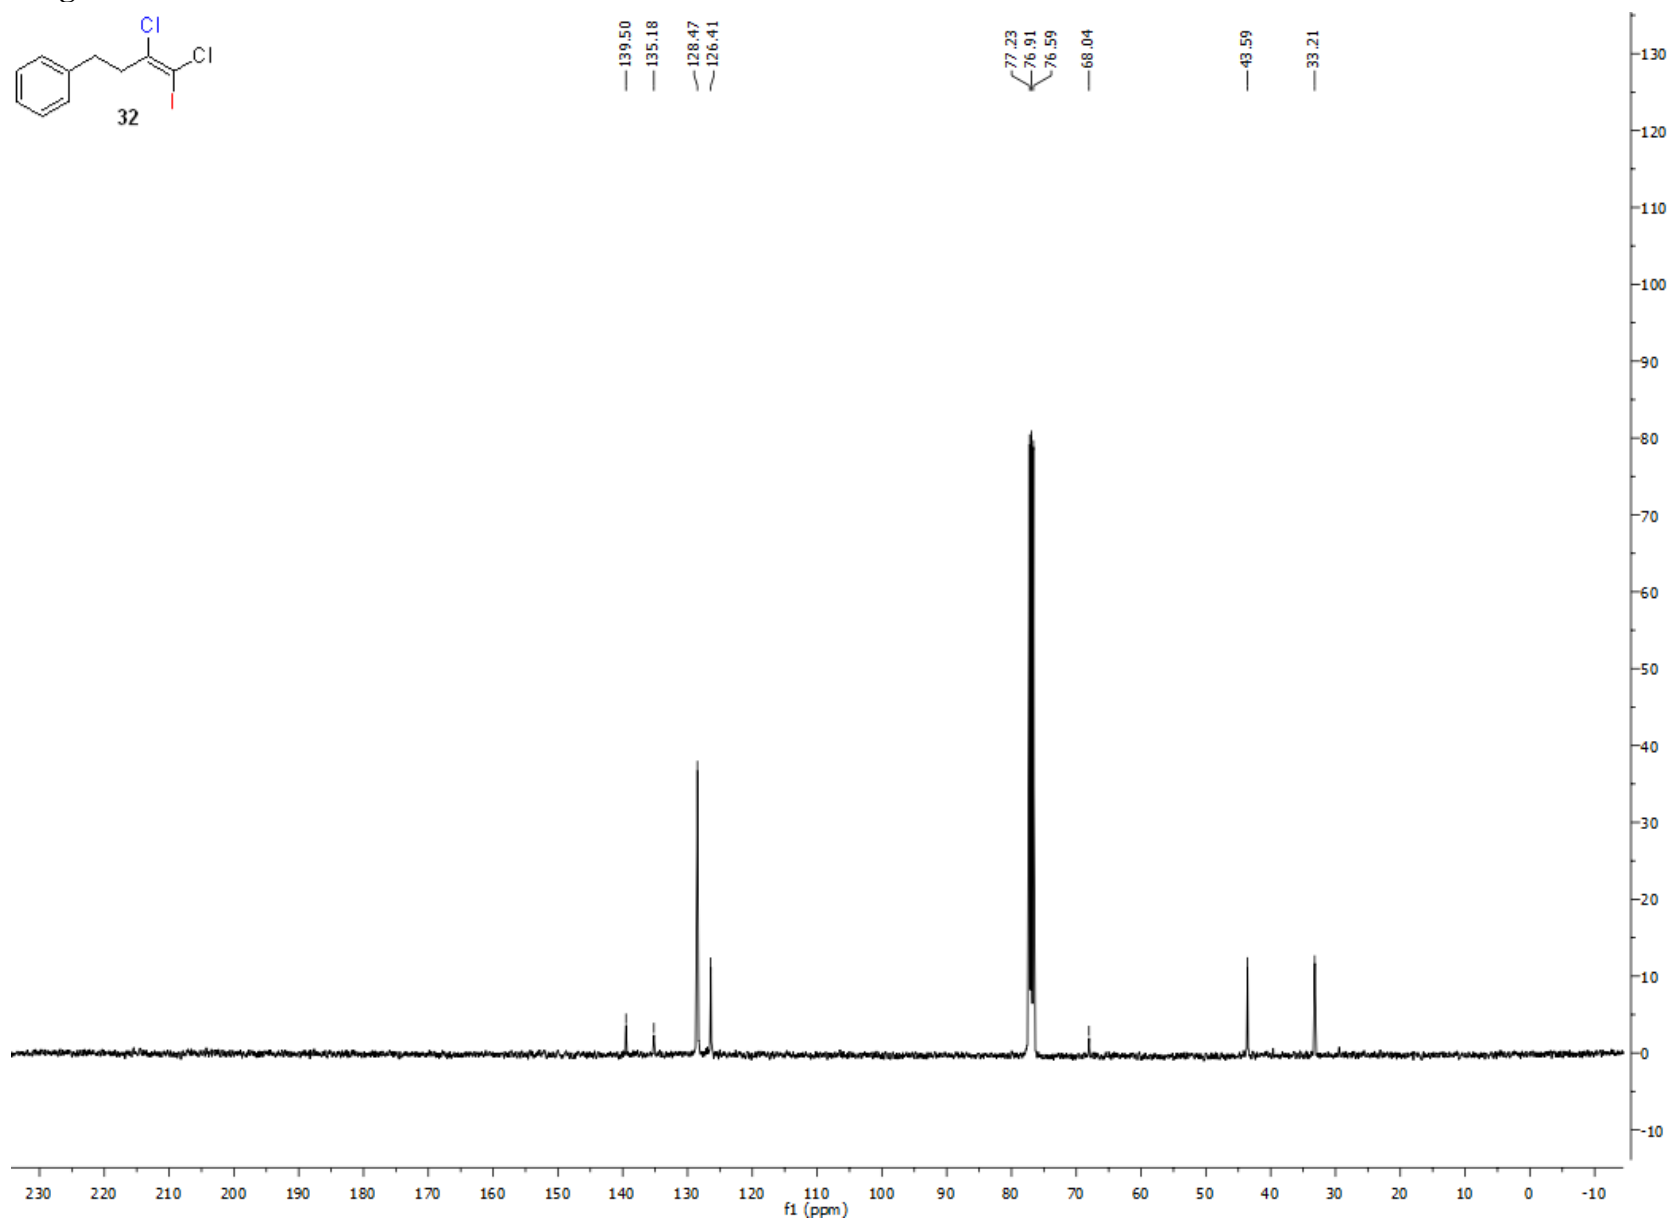

Figure S82. <sup>1</sup>H-NMR of 33

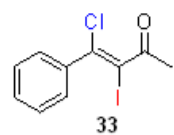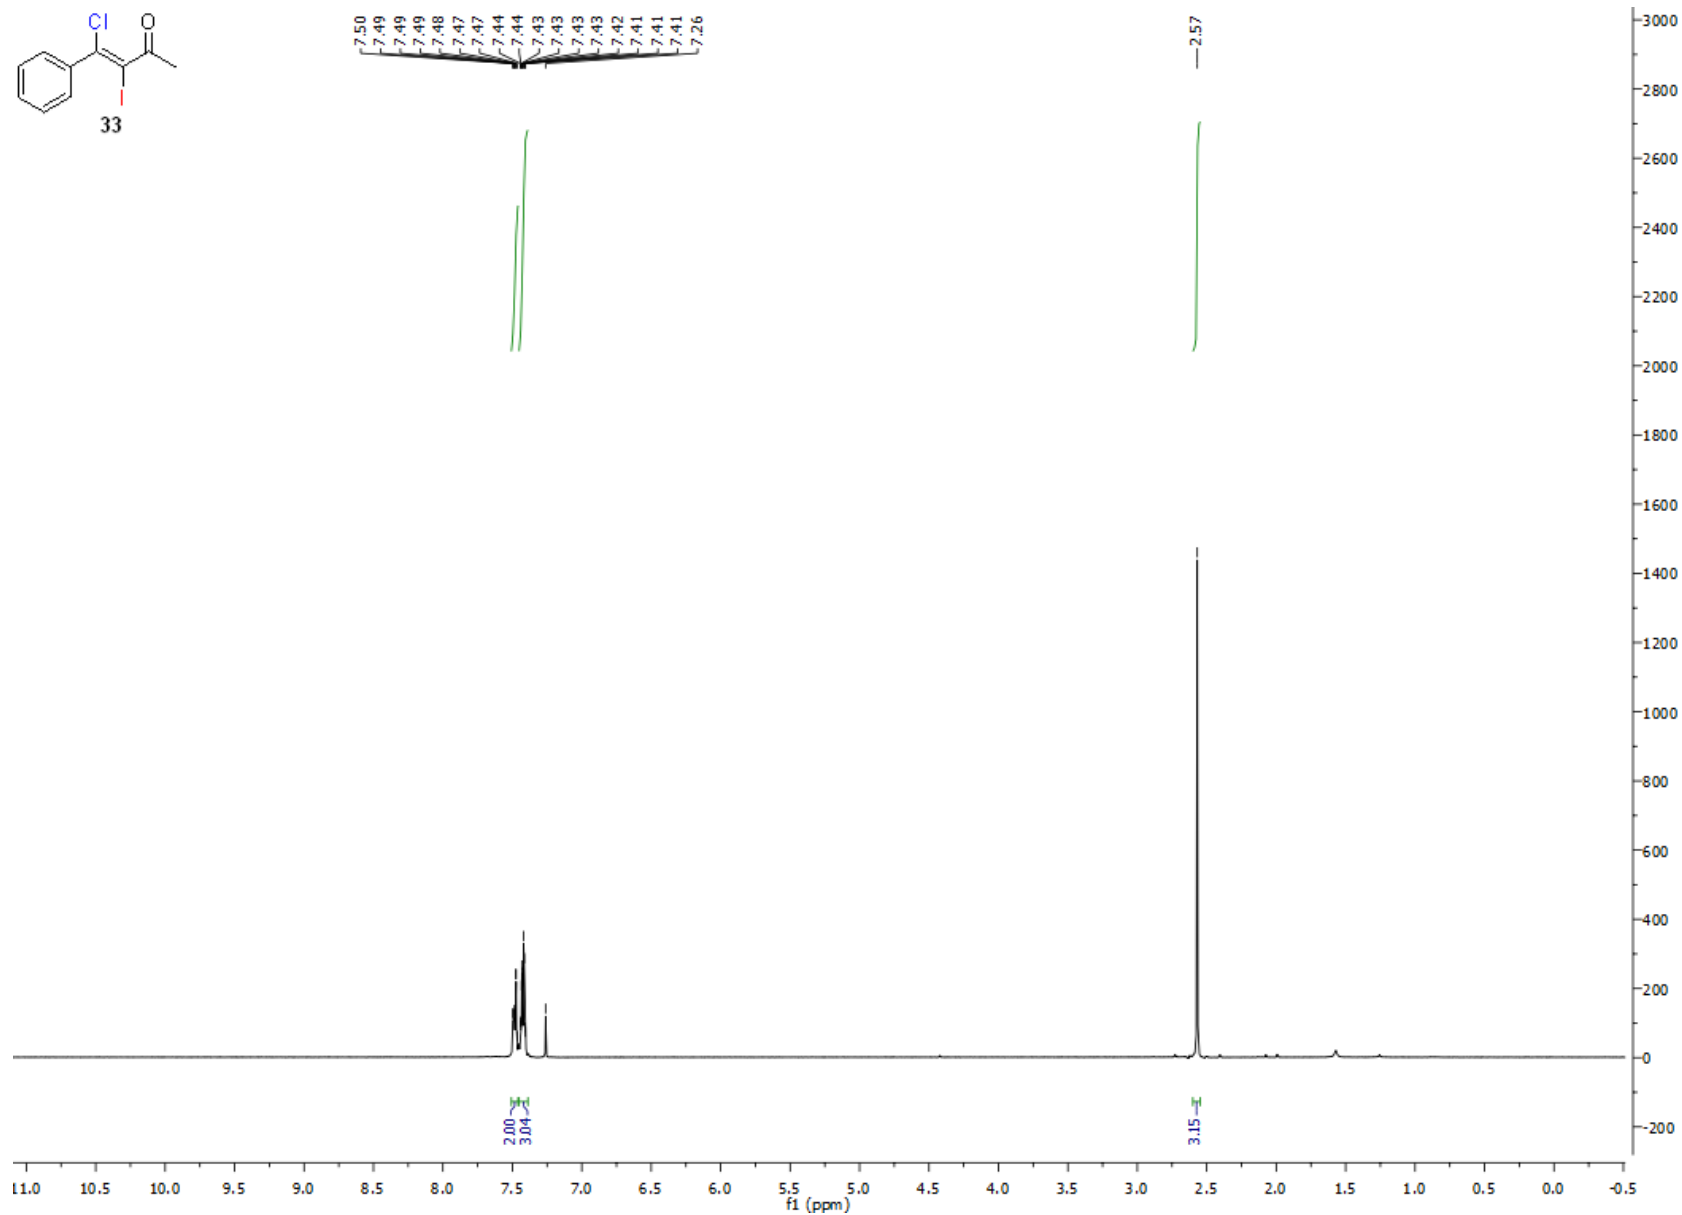



Figure S83.  $^{13}\text{C}$ -NMR of 33

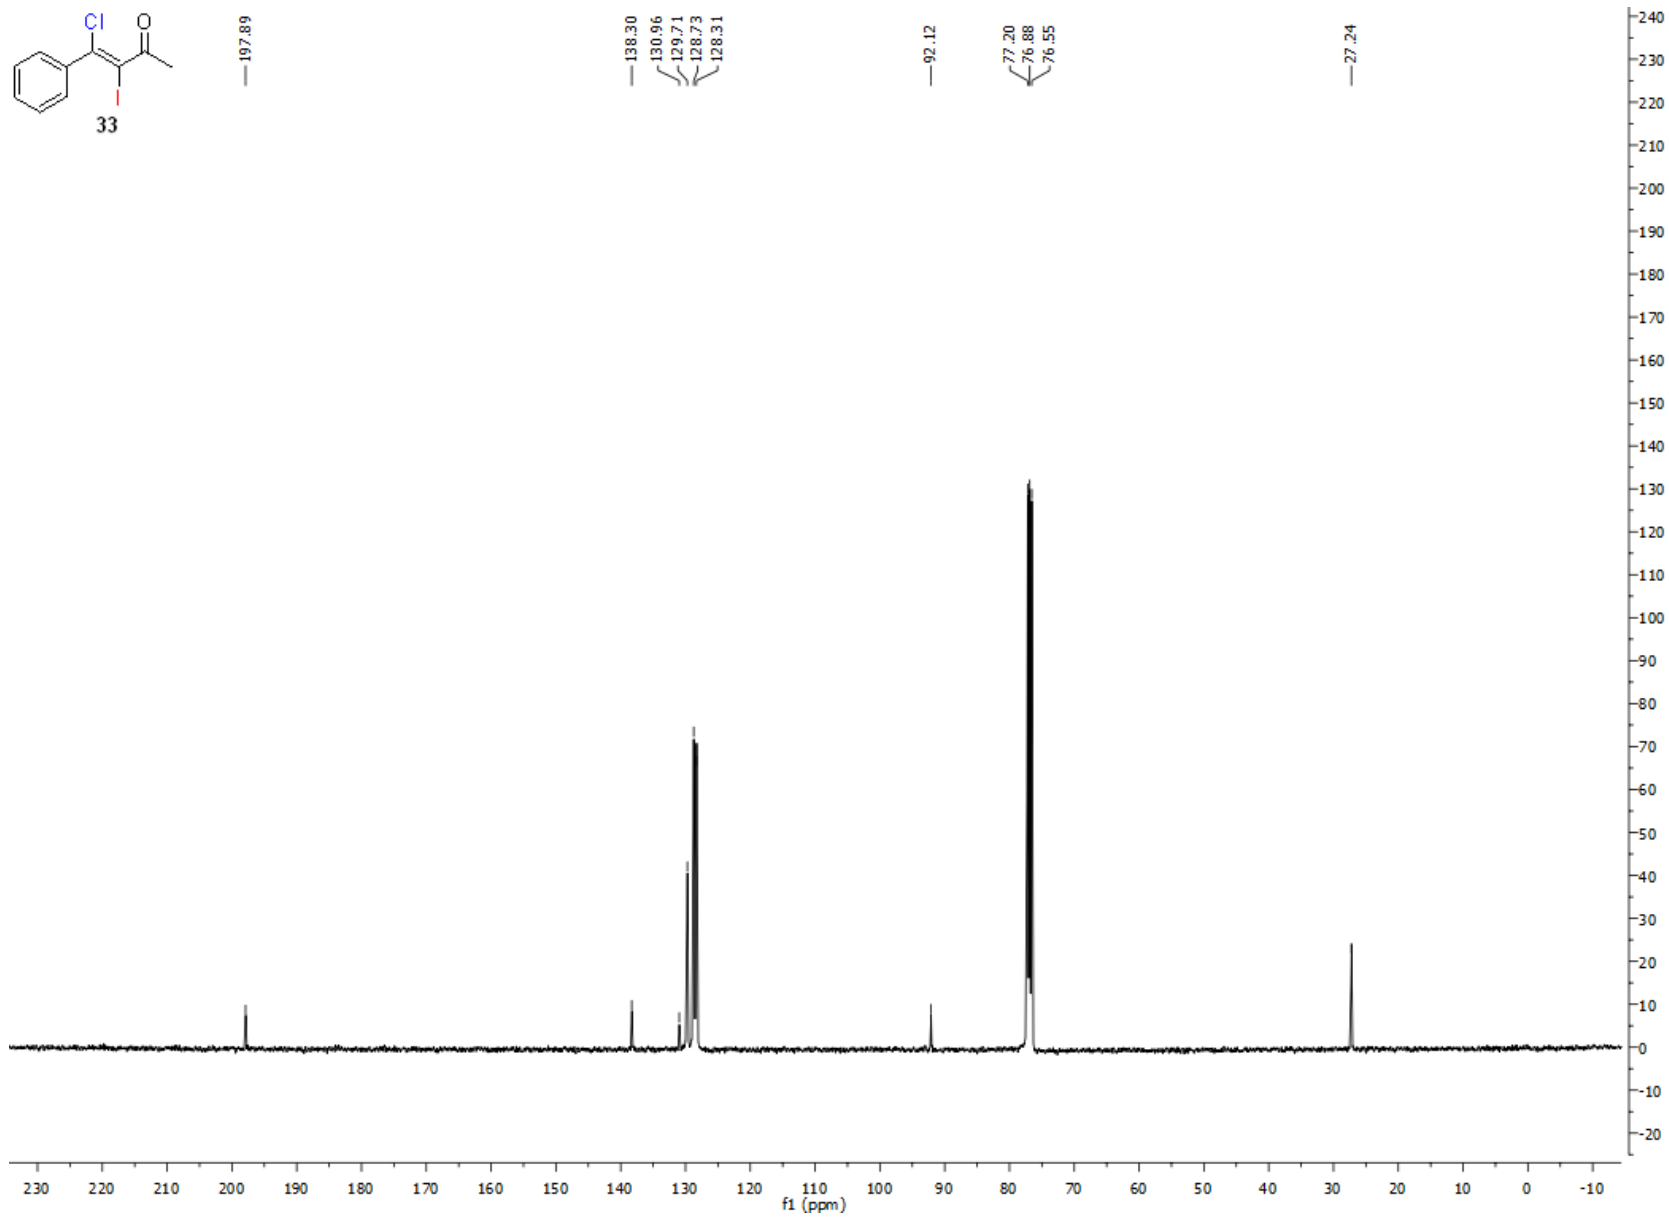

Figure S84. <sup>1</sup>H-NMR of 34

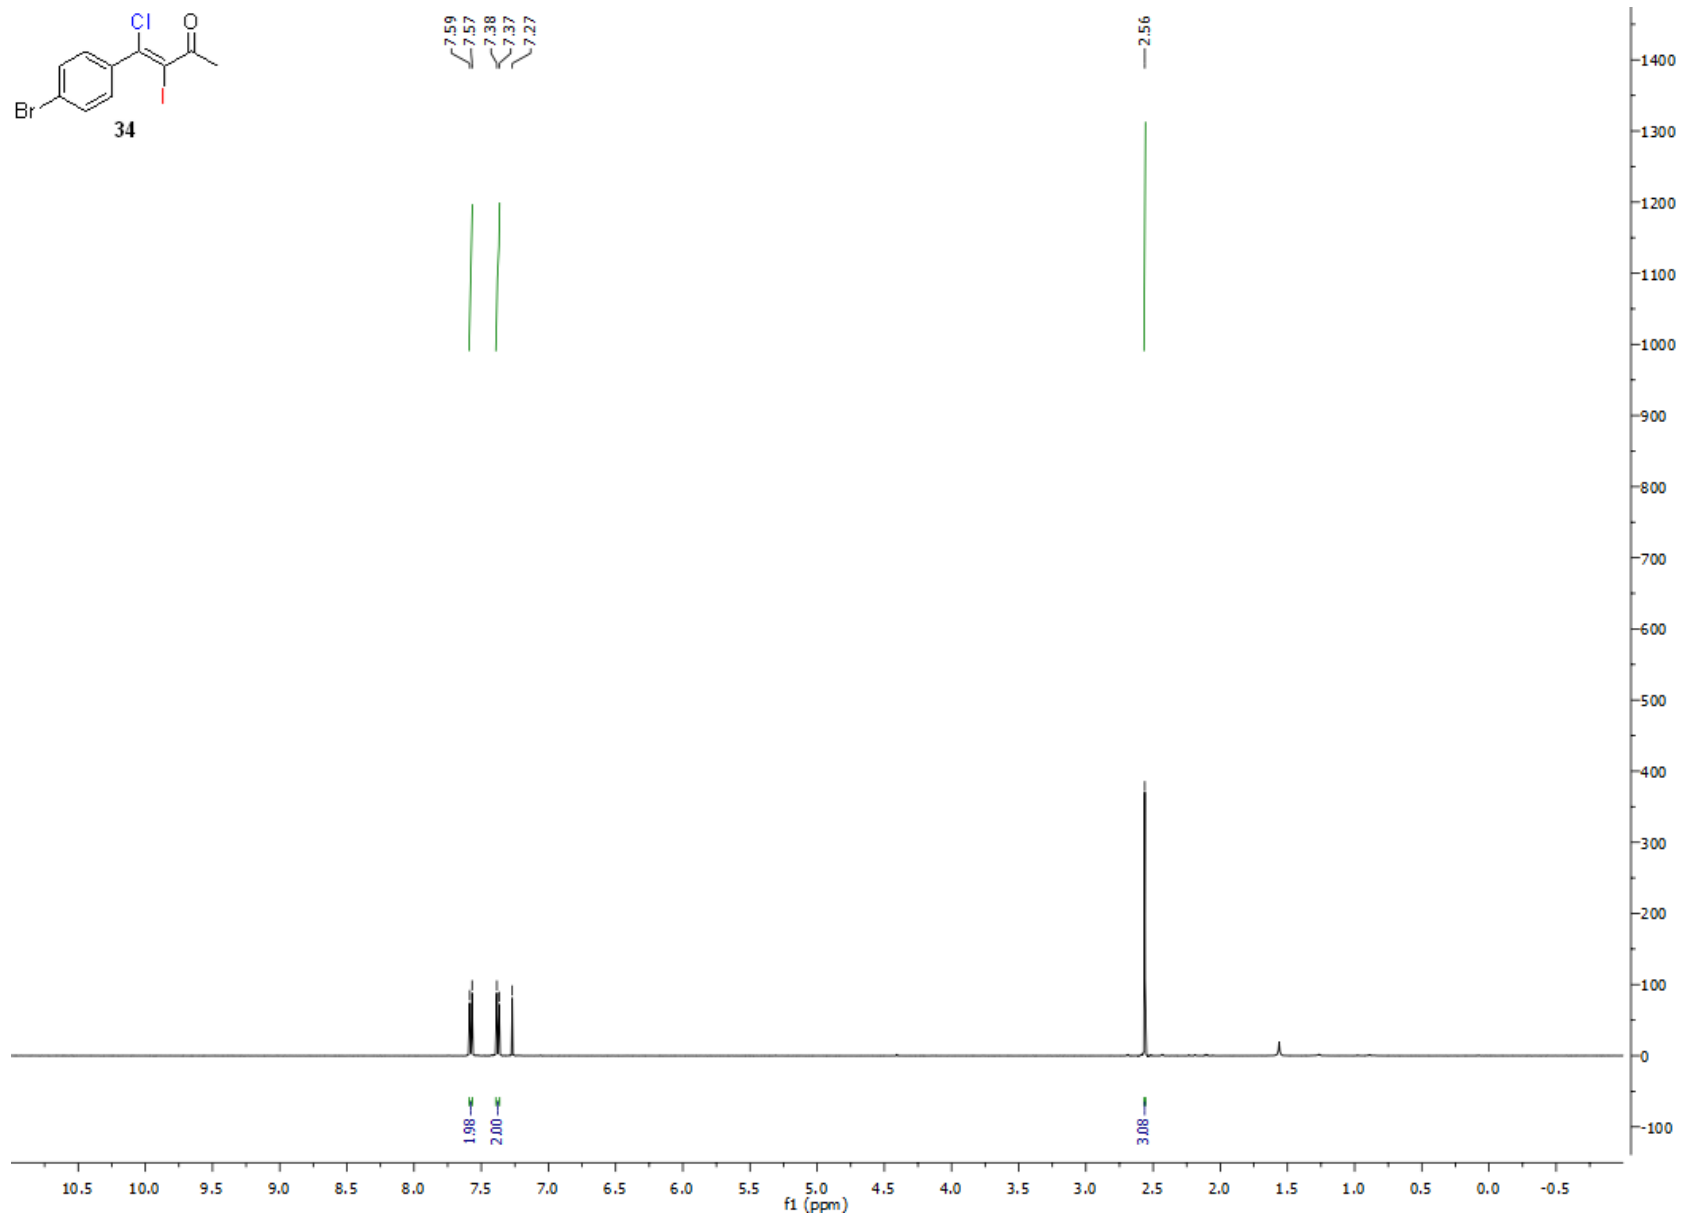

Figure S85. <sup>13</sup>C-NMR of 34

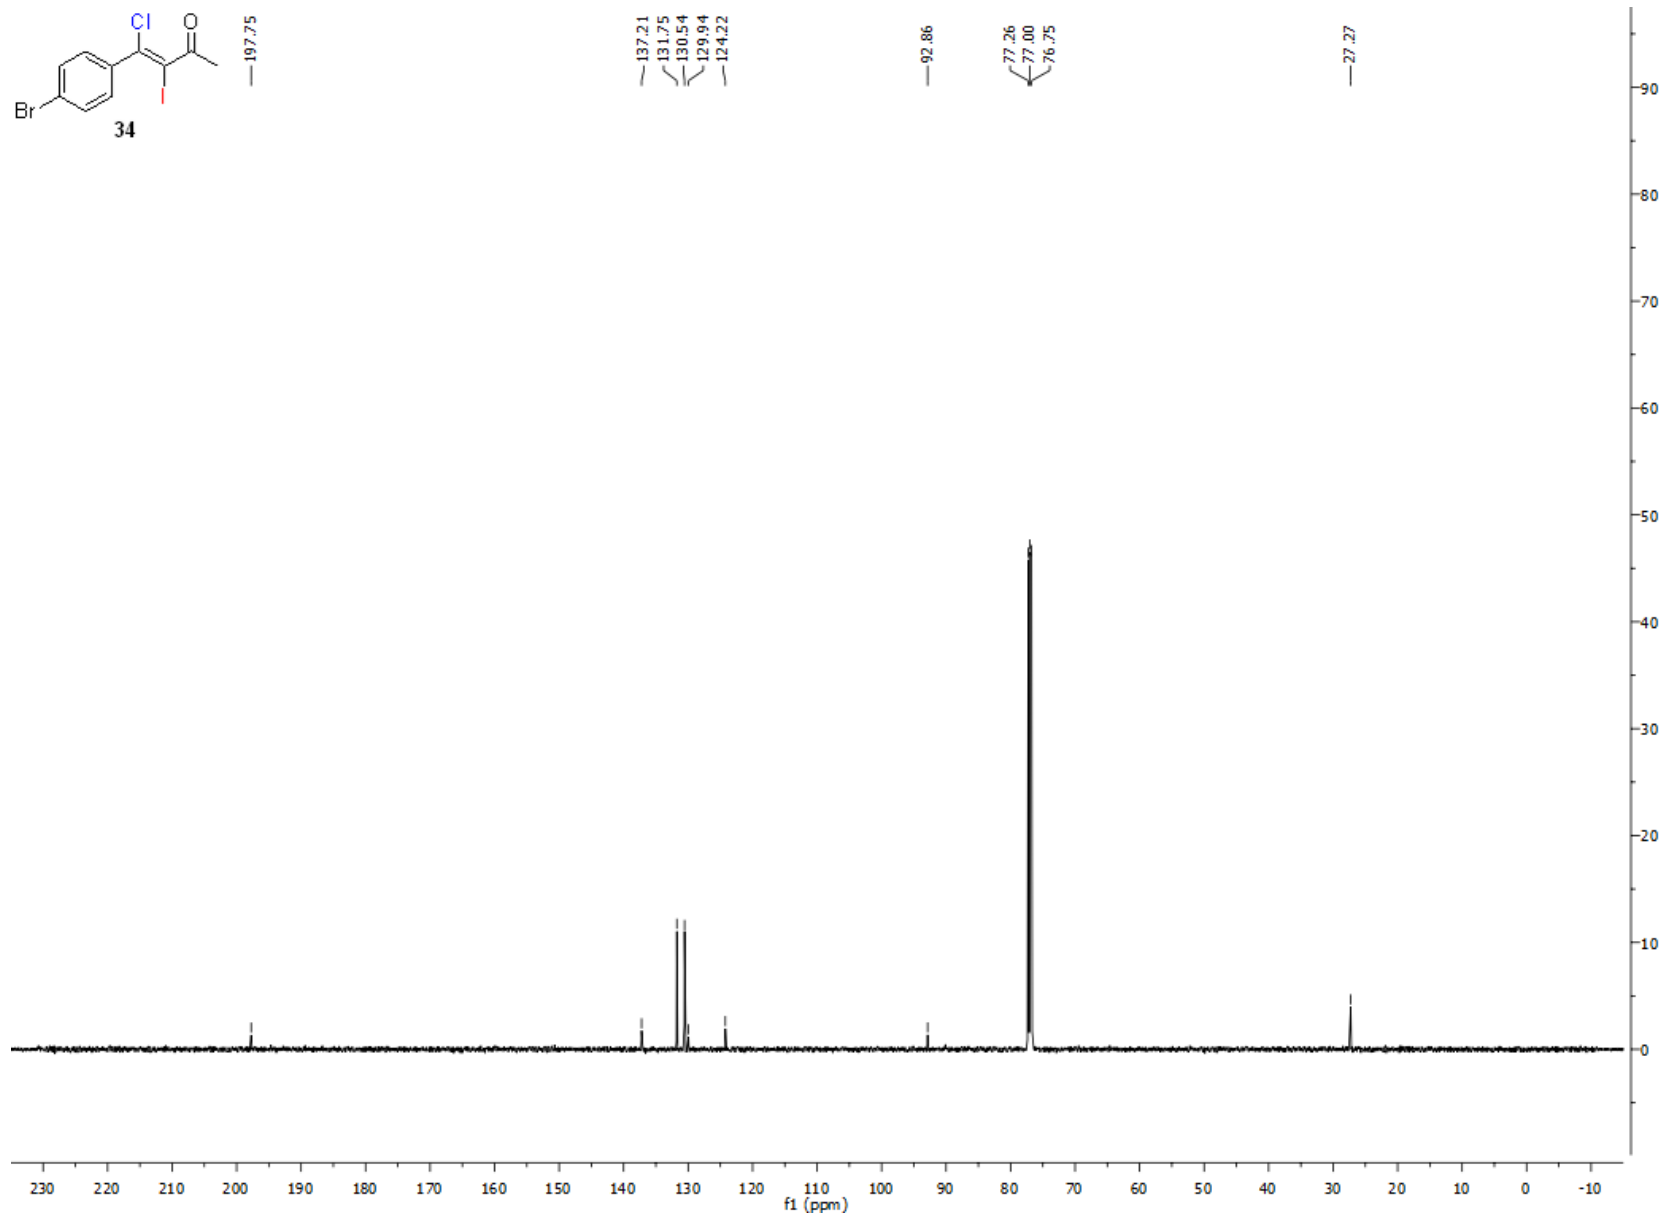

Figure S86. <sup>1</sup>H-NMR of 35

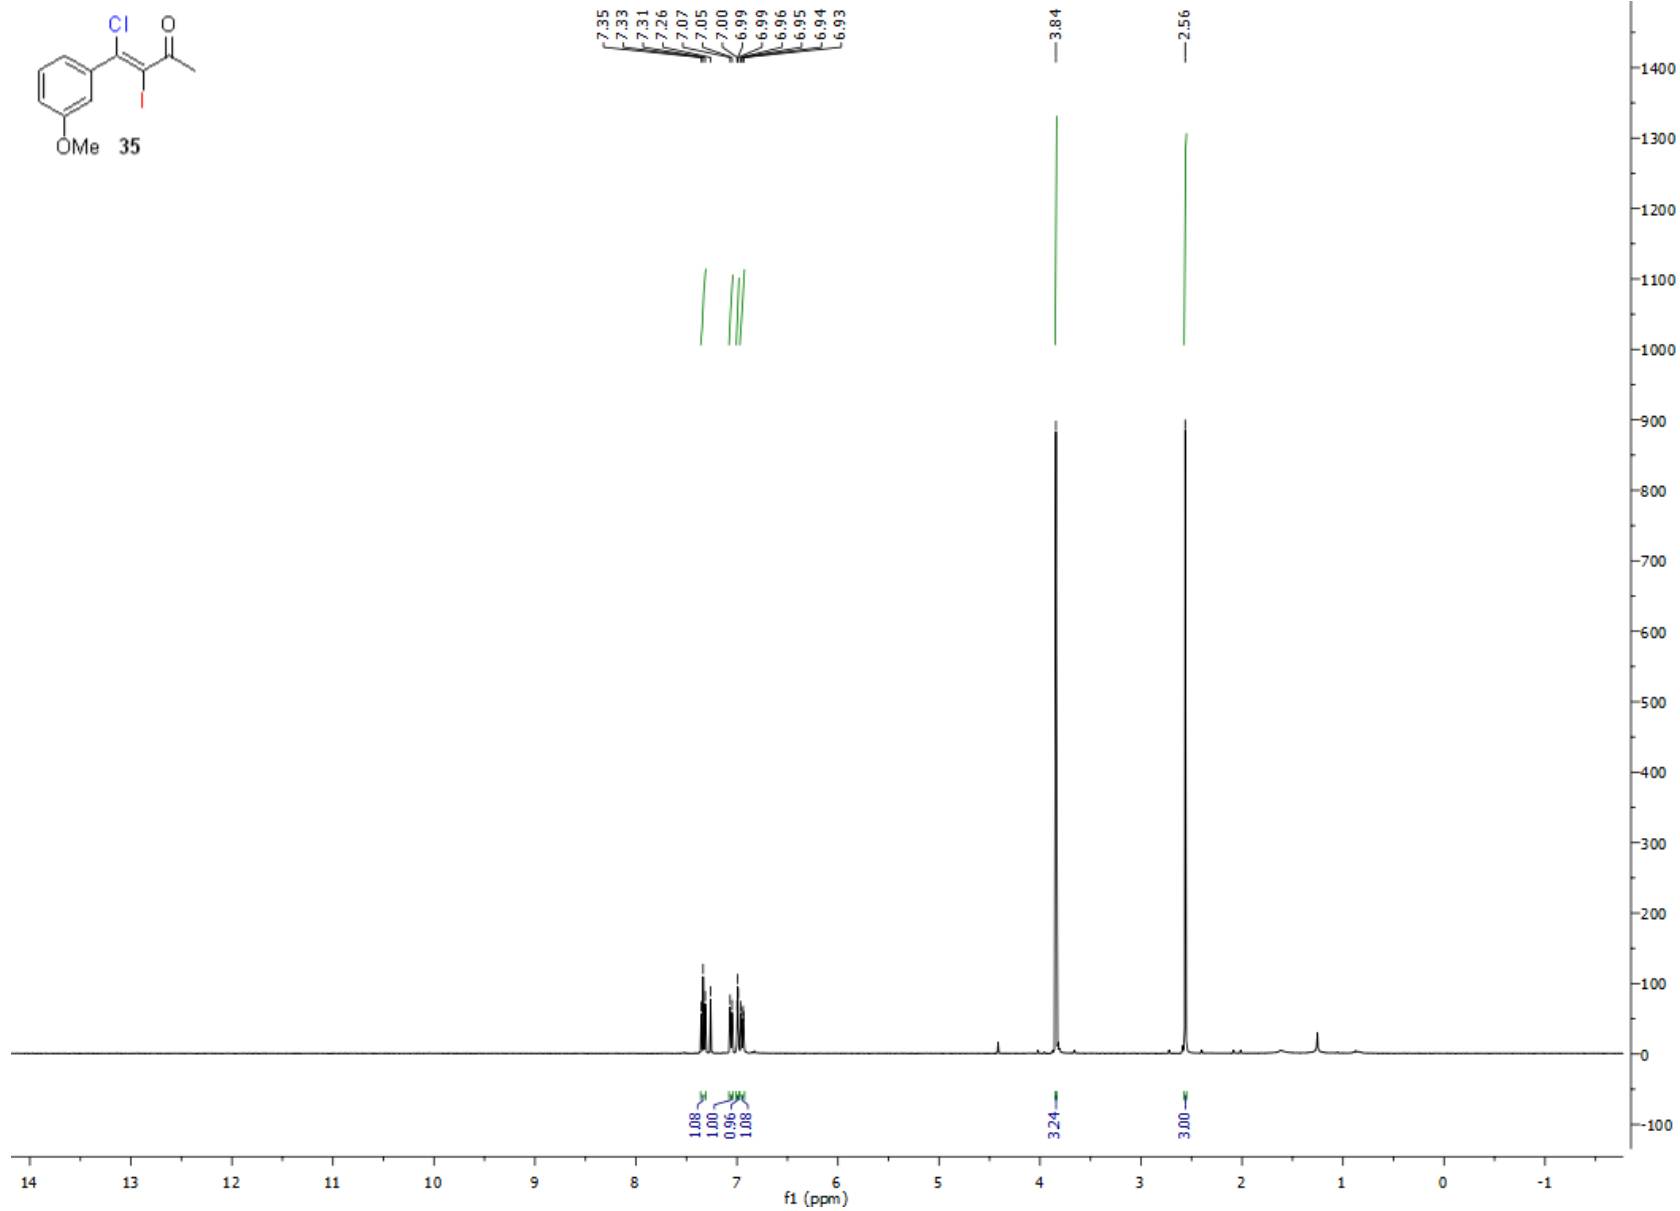

Figure S87. <sup>13</sup>C-NMR of 35

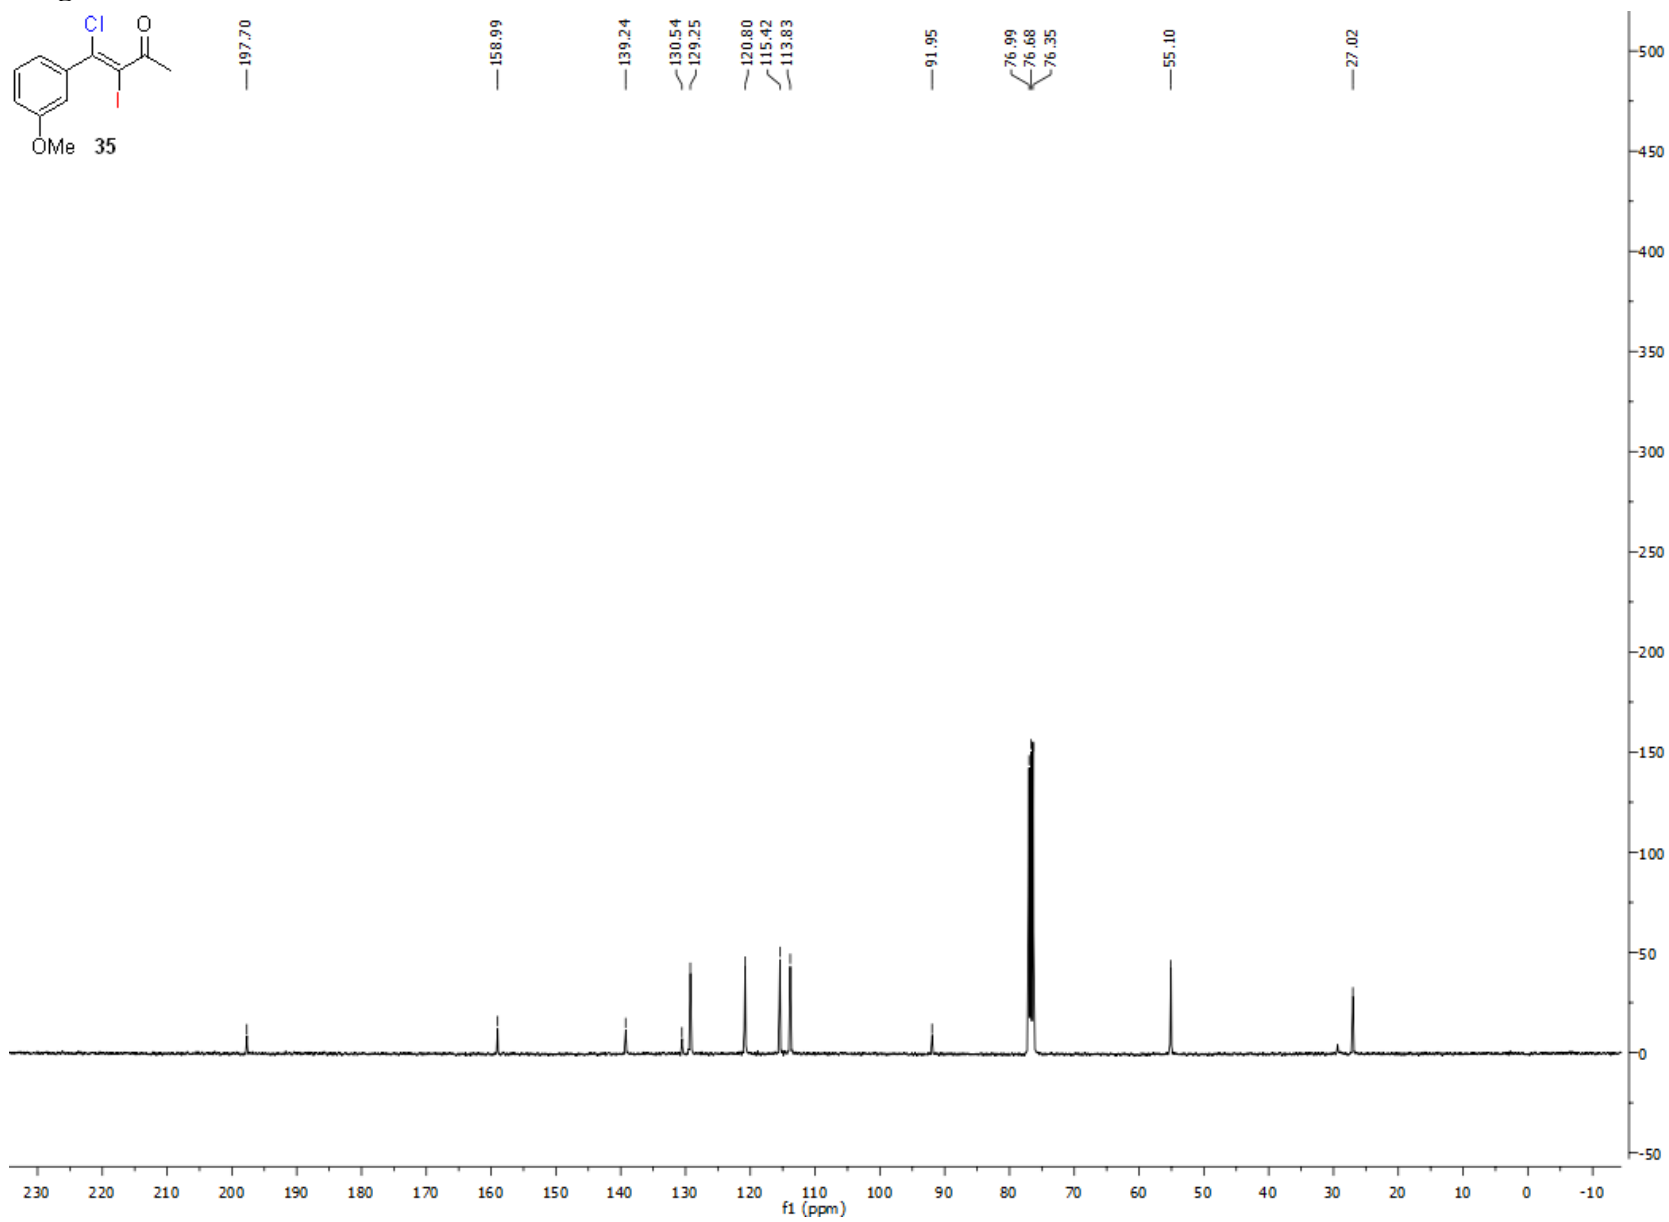

Figure S88. <sup>1</sup>H-NMR of 36

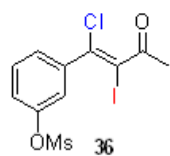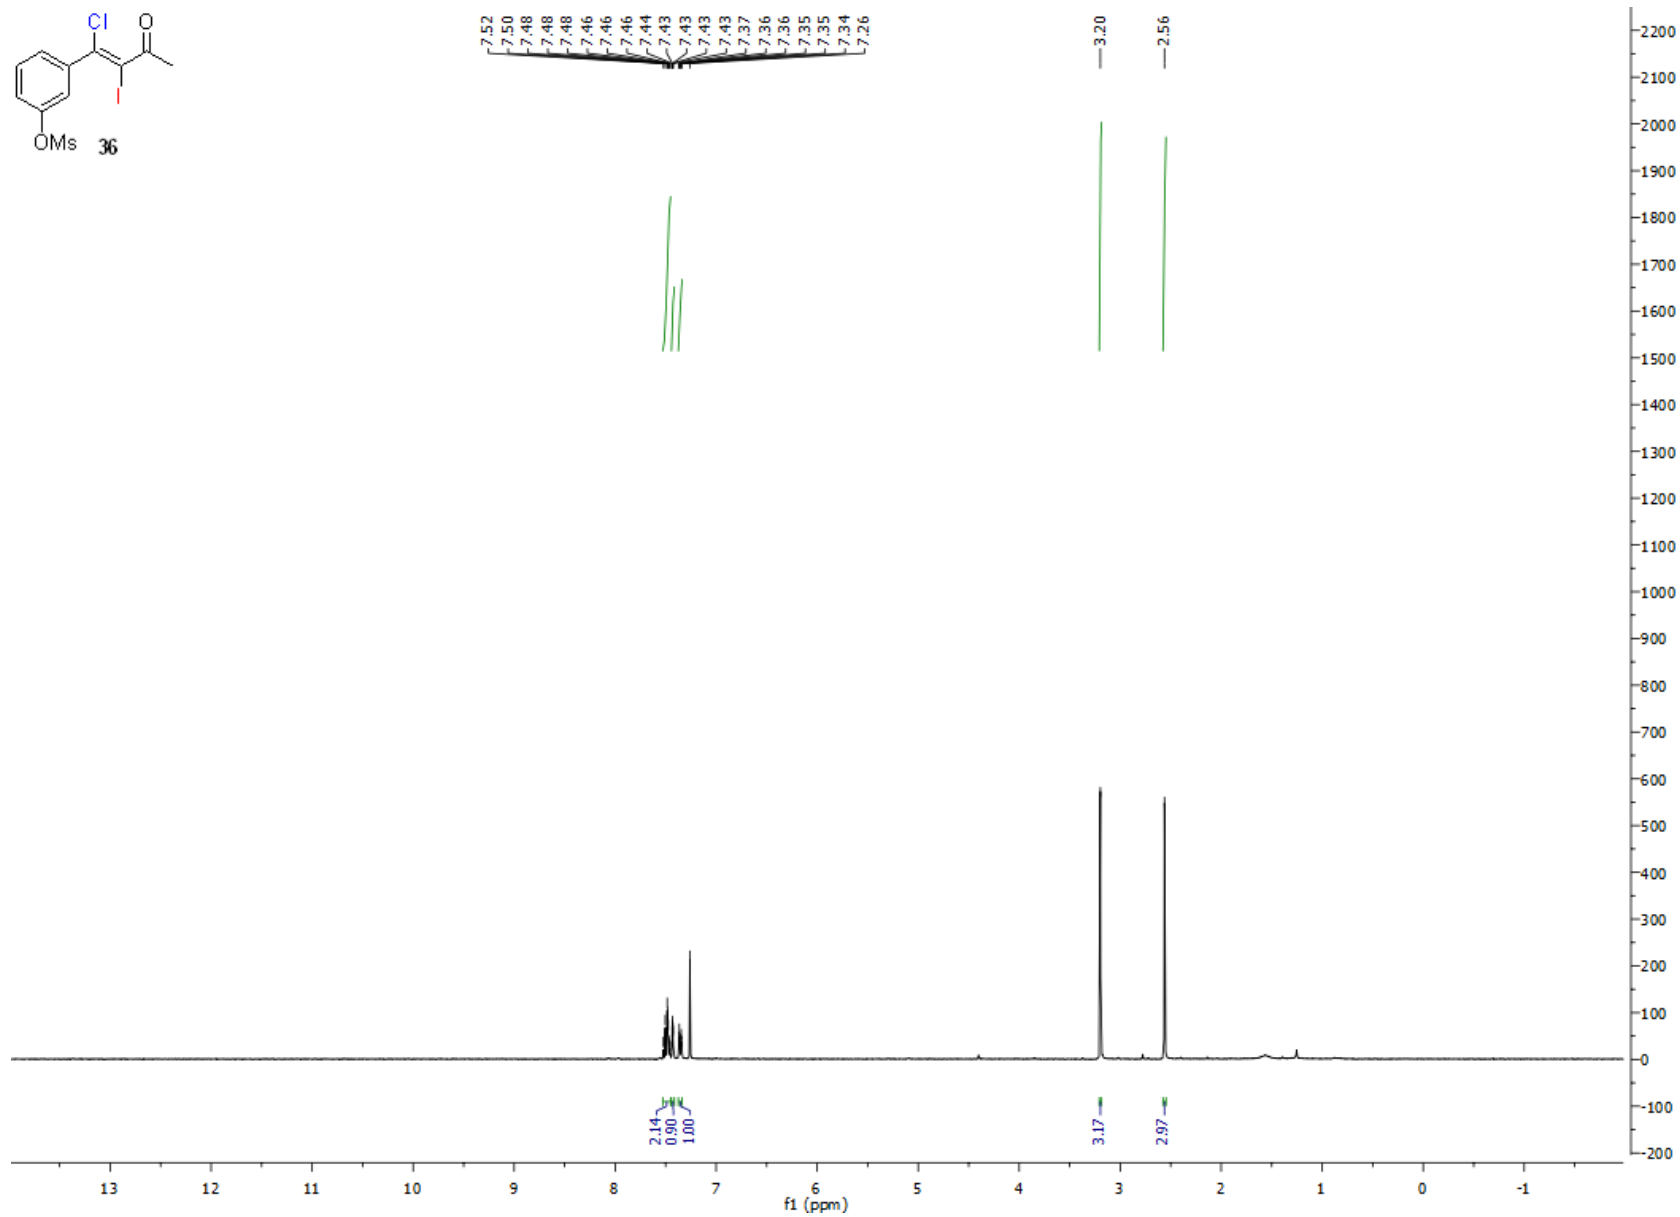

Figure S89. <sup>13</sup>C-NMR of 36

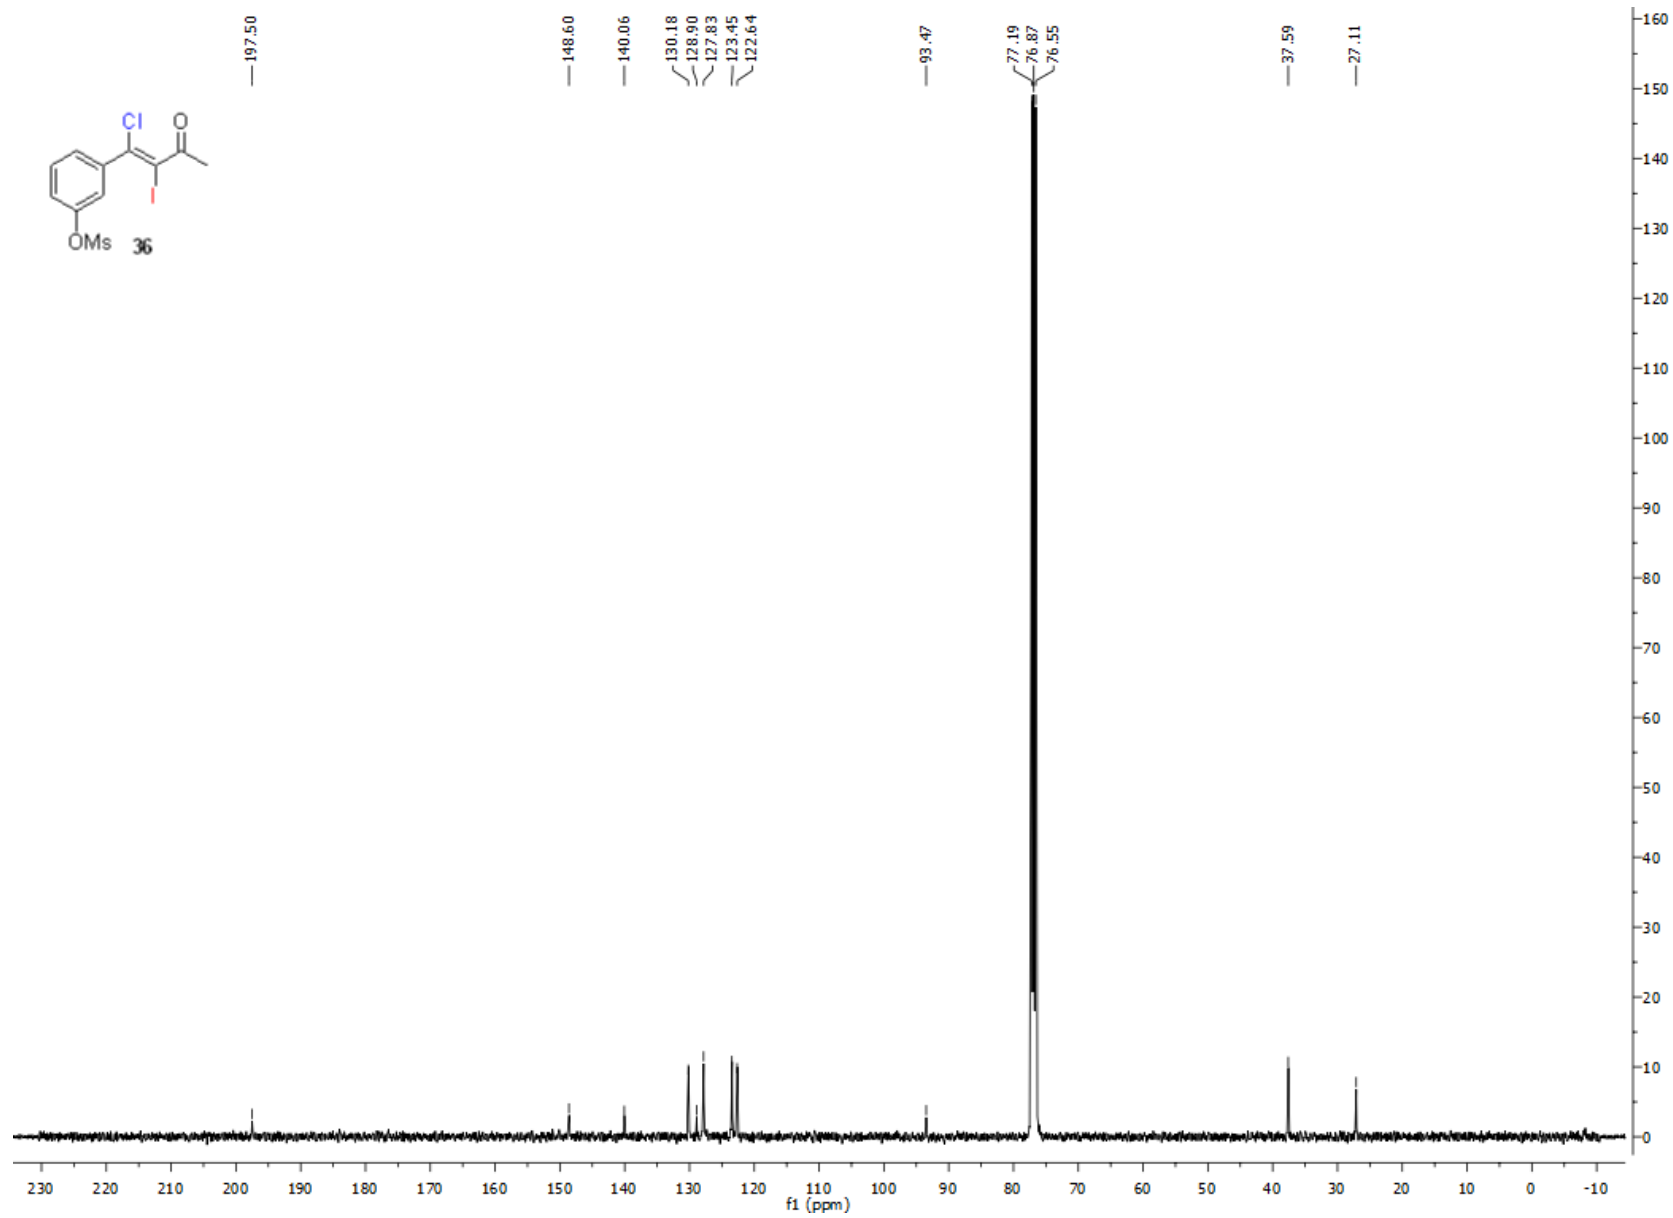

Figure S90. <sup>1</sup>H-NMR of 37

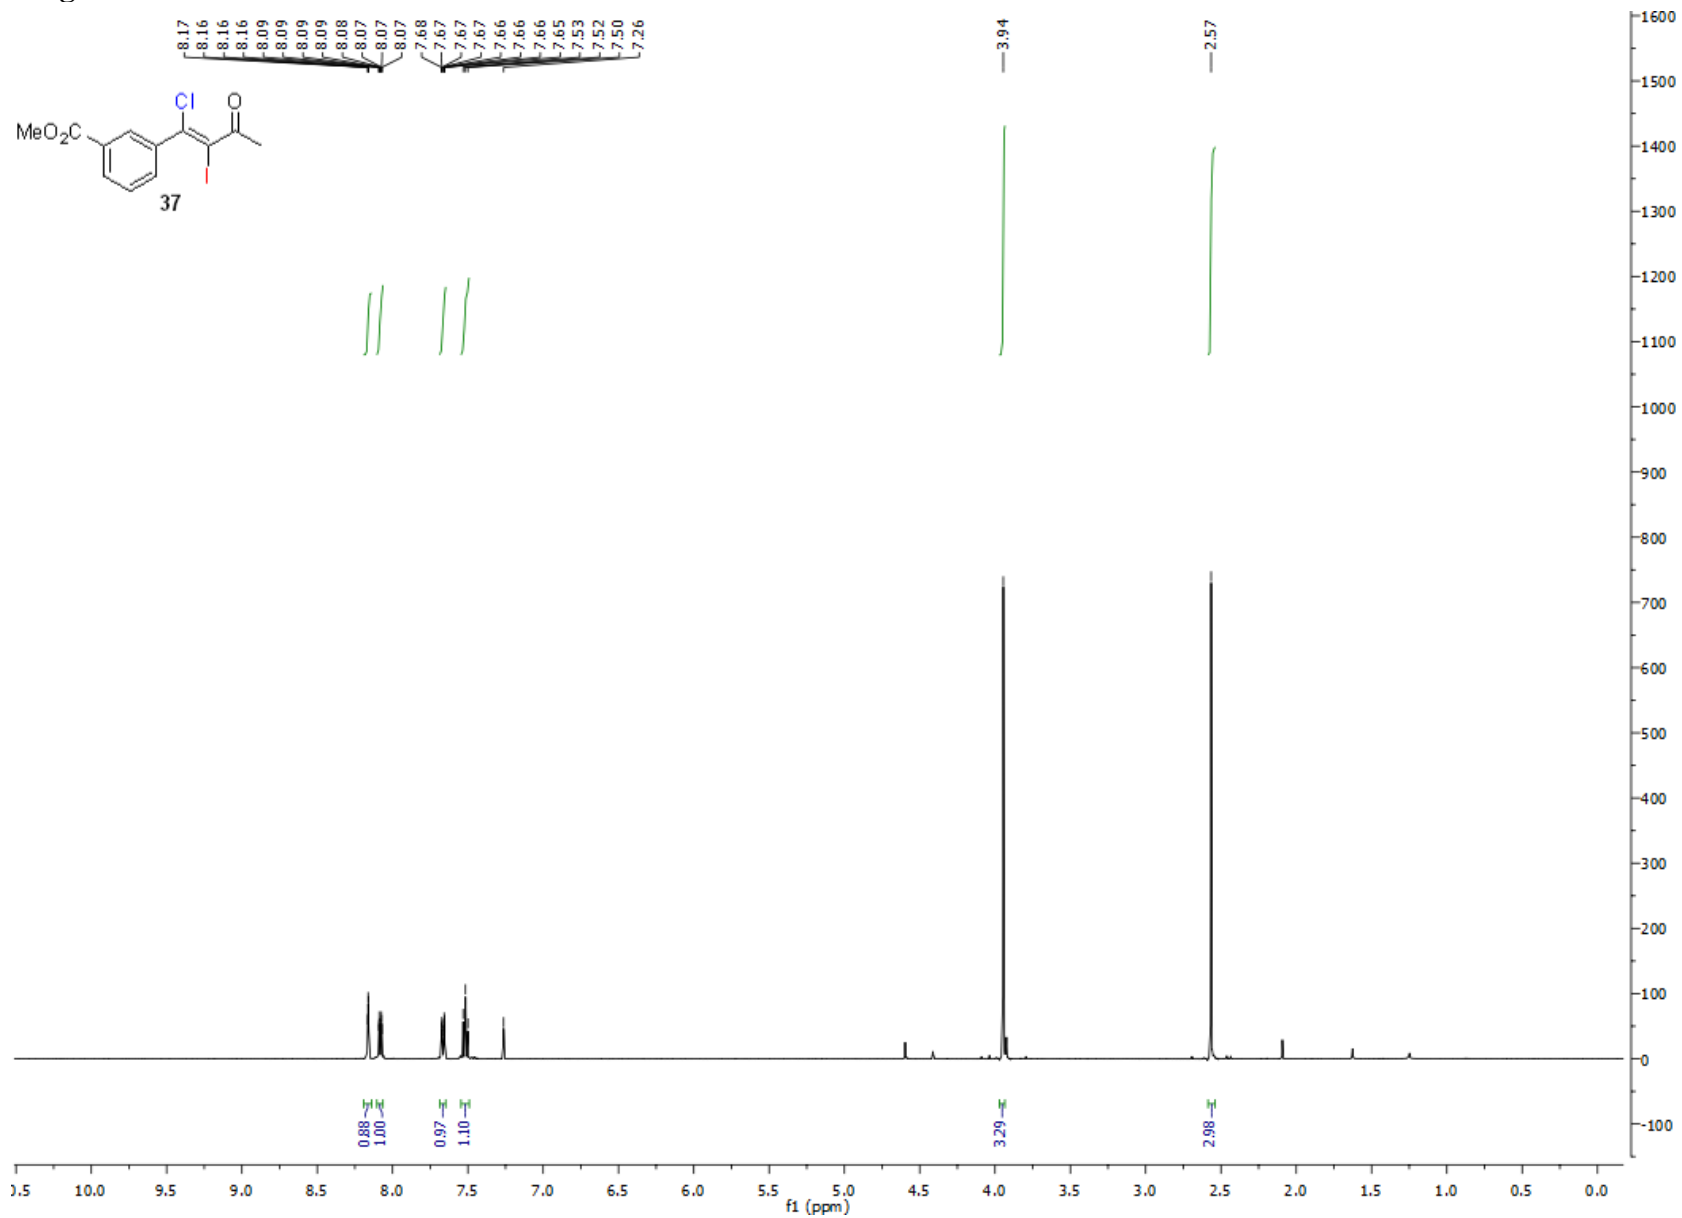



Figure S91.  $^{13}\text{C}$ -NMR of 37

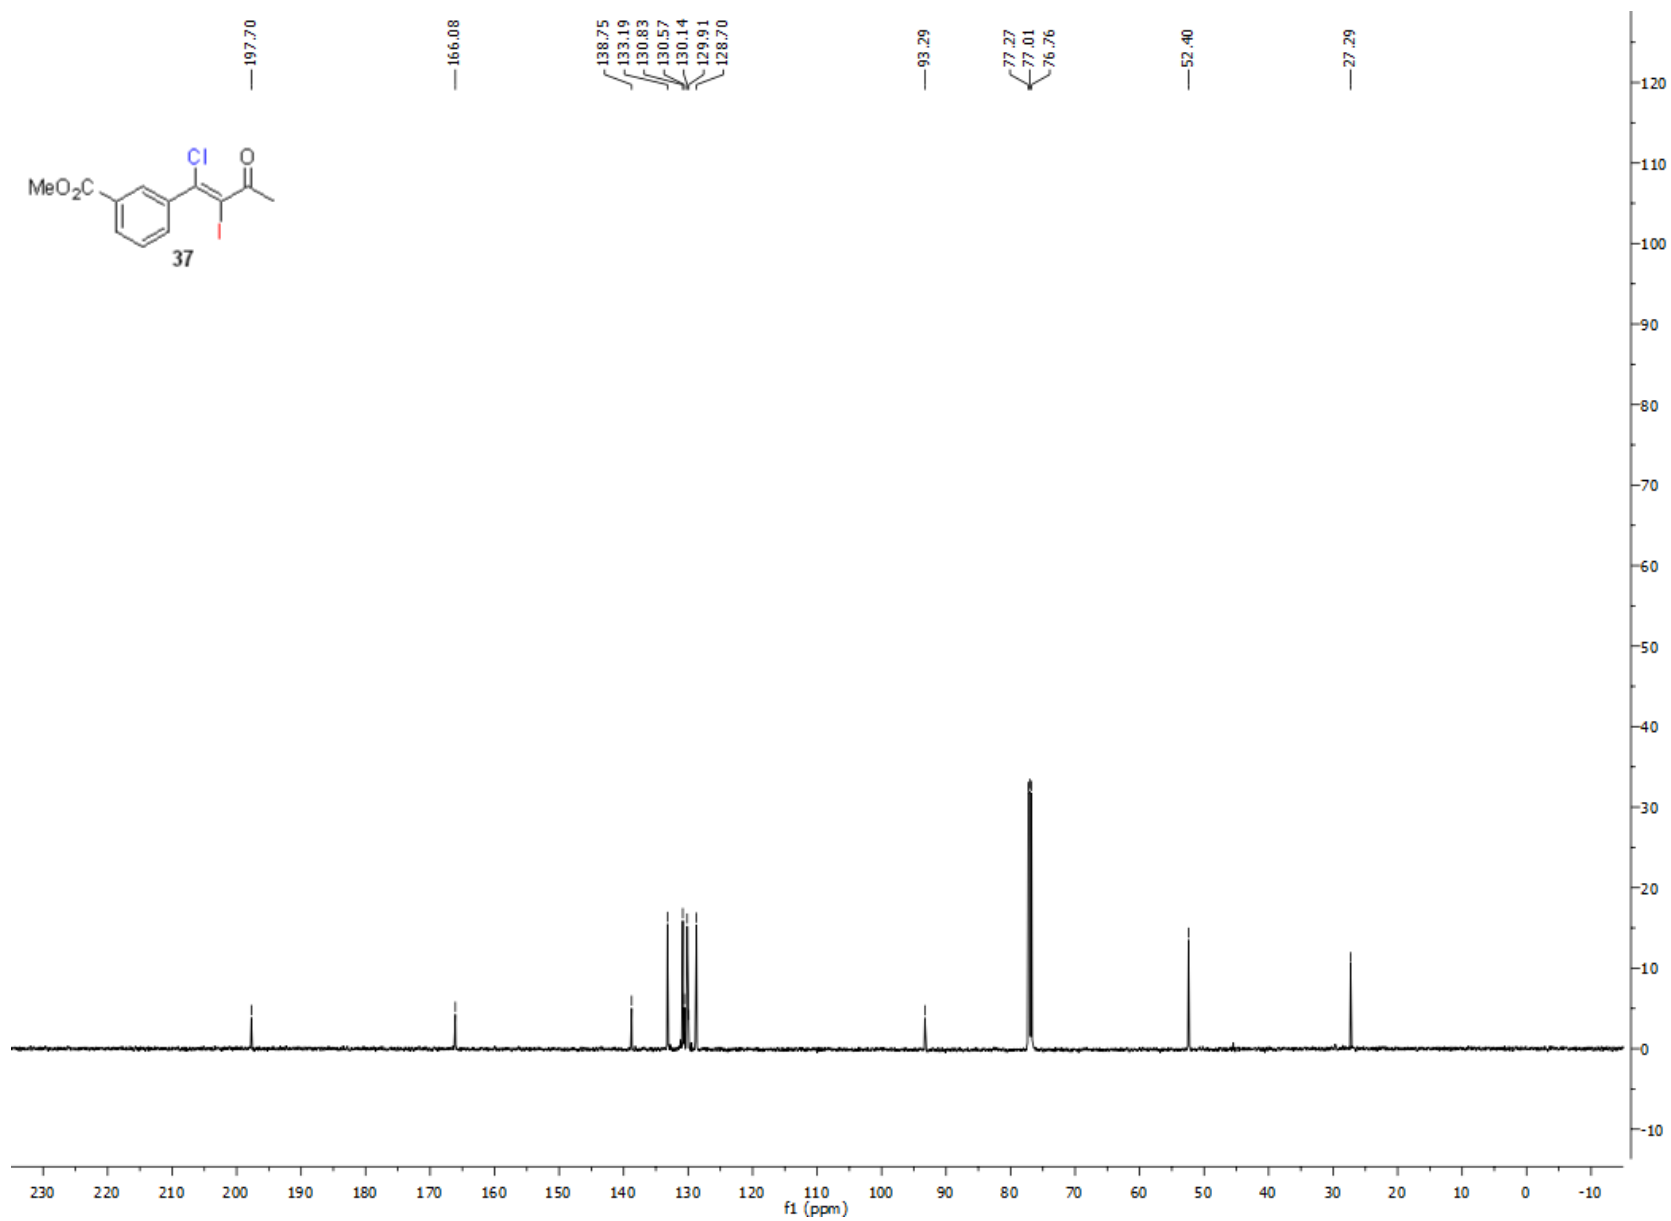

Figure S92. <sup>1</sup>H-NMR of 38

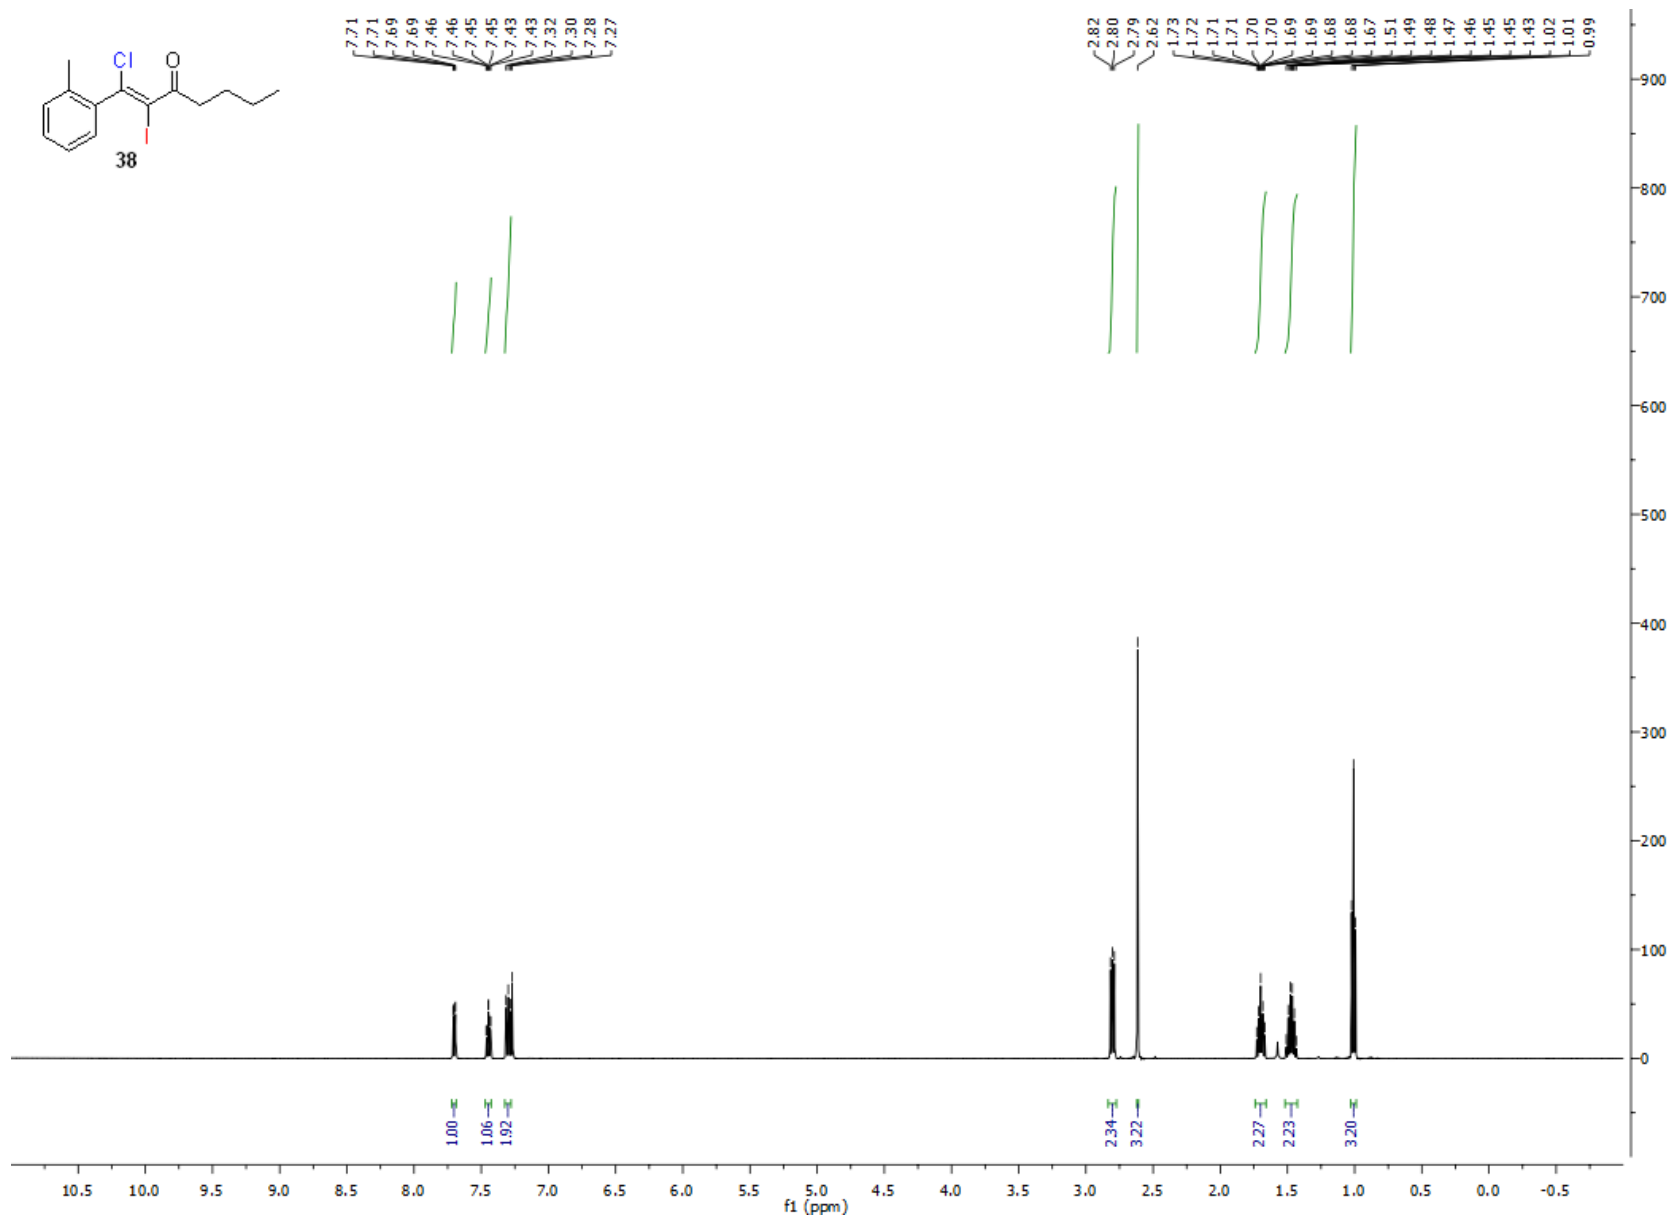

Figure S93. <sup>13</sup>C-NMR of 38

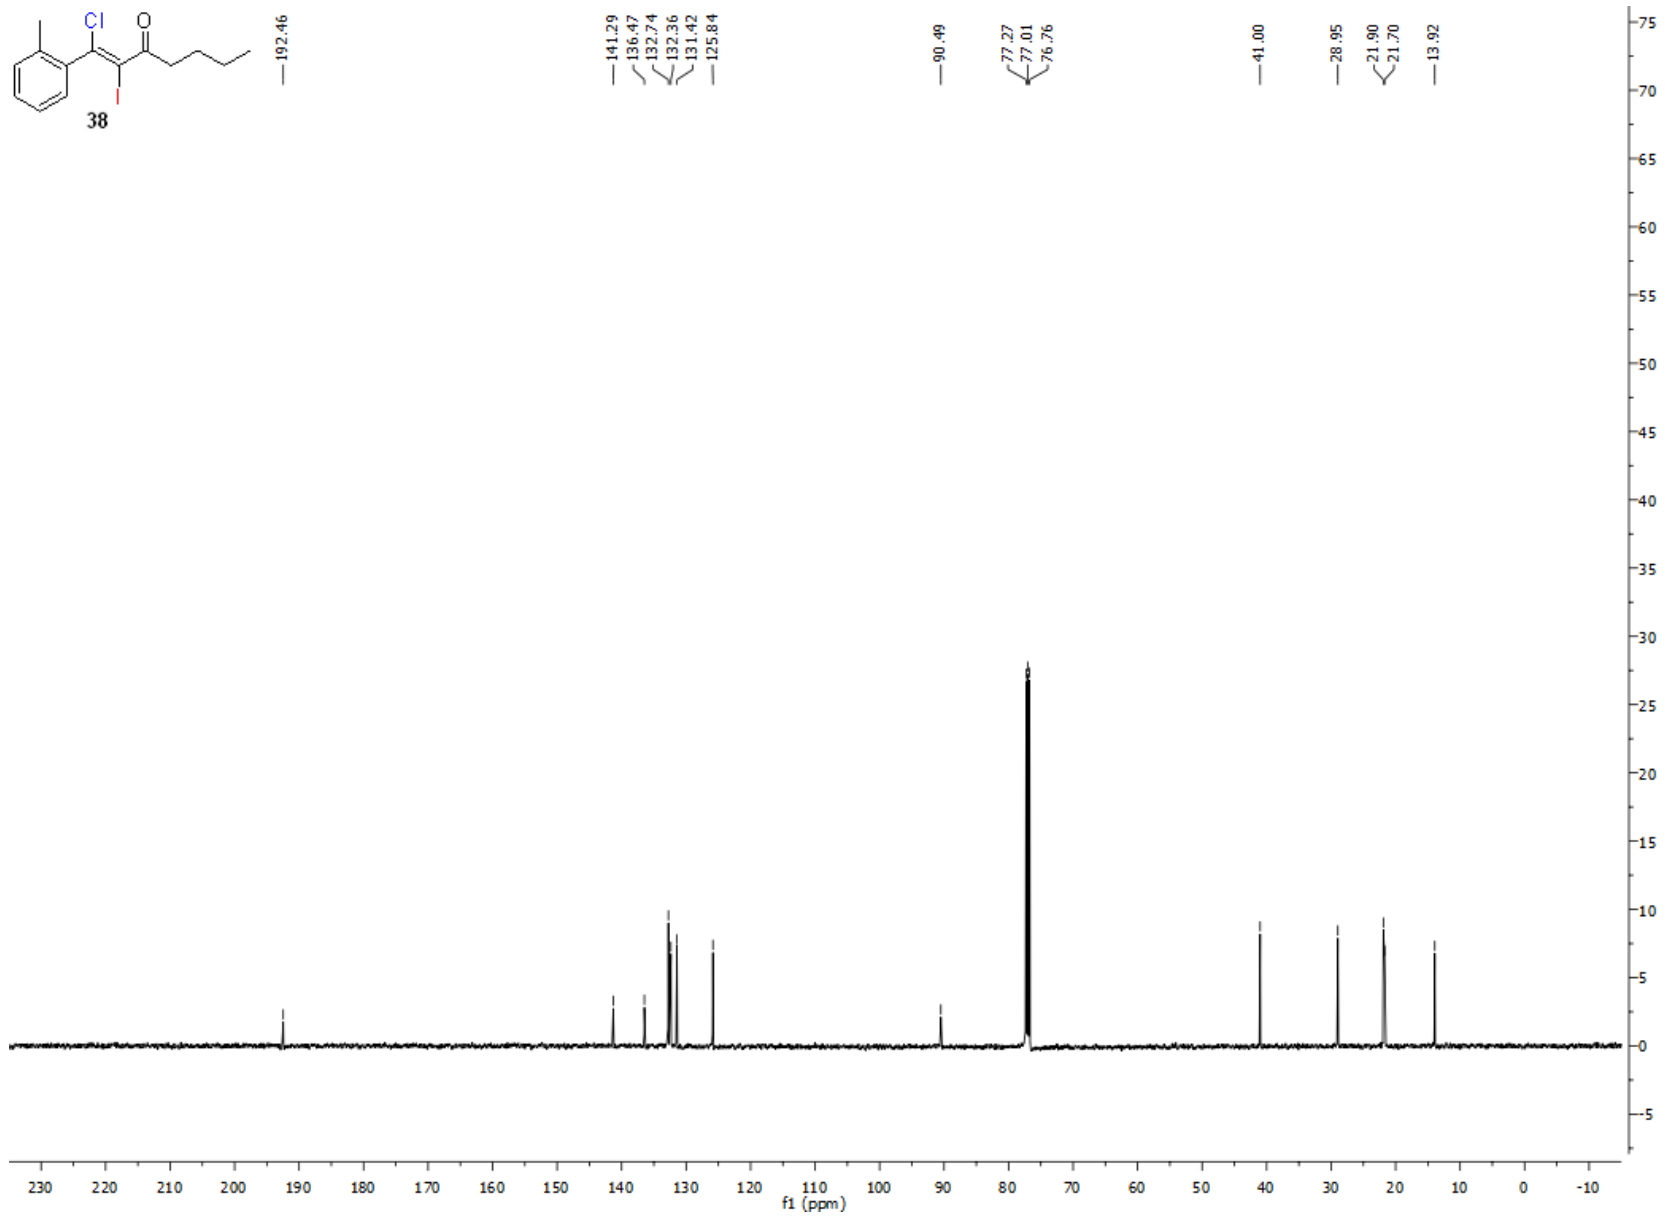

Figure S94. <sup>1</sup>H-NMR of 39

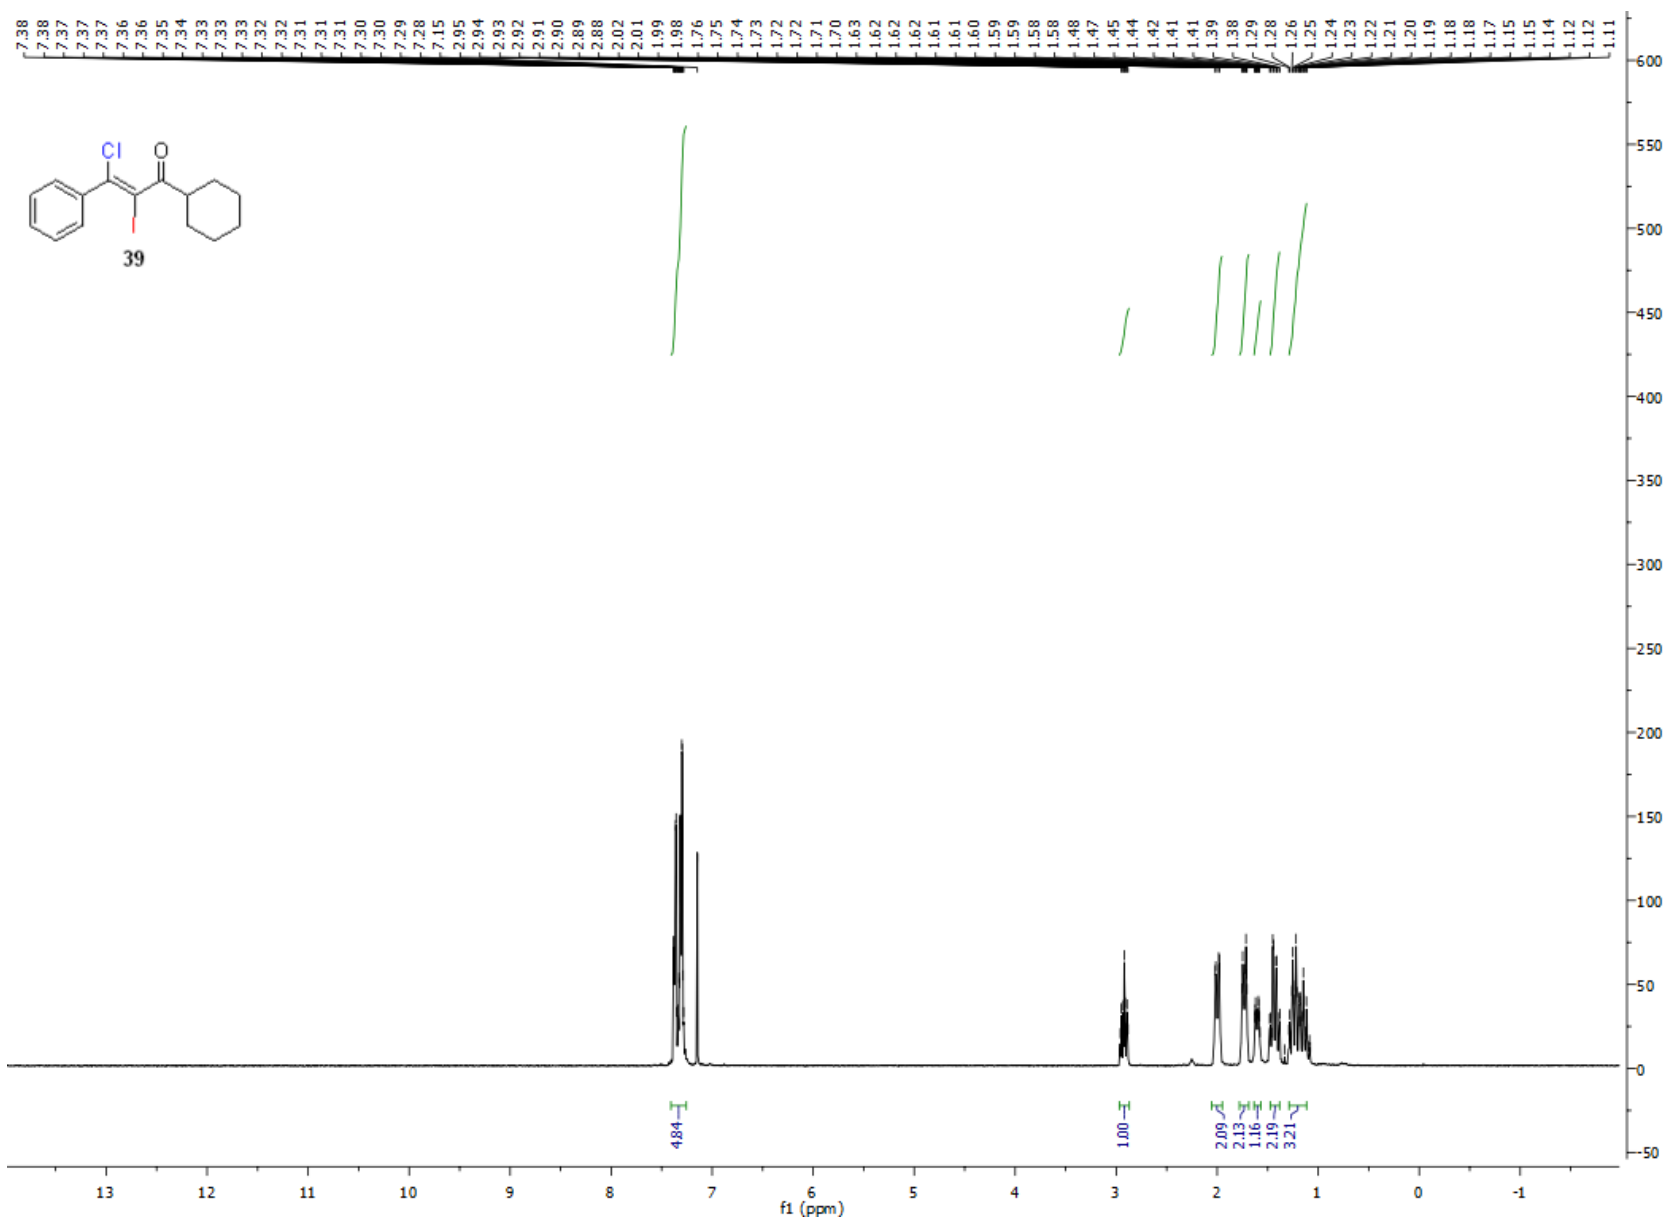

Figure S95. <sup>13</sup>C-NMR of 39

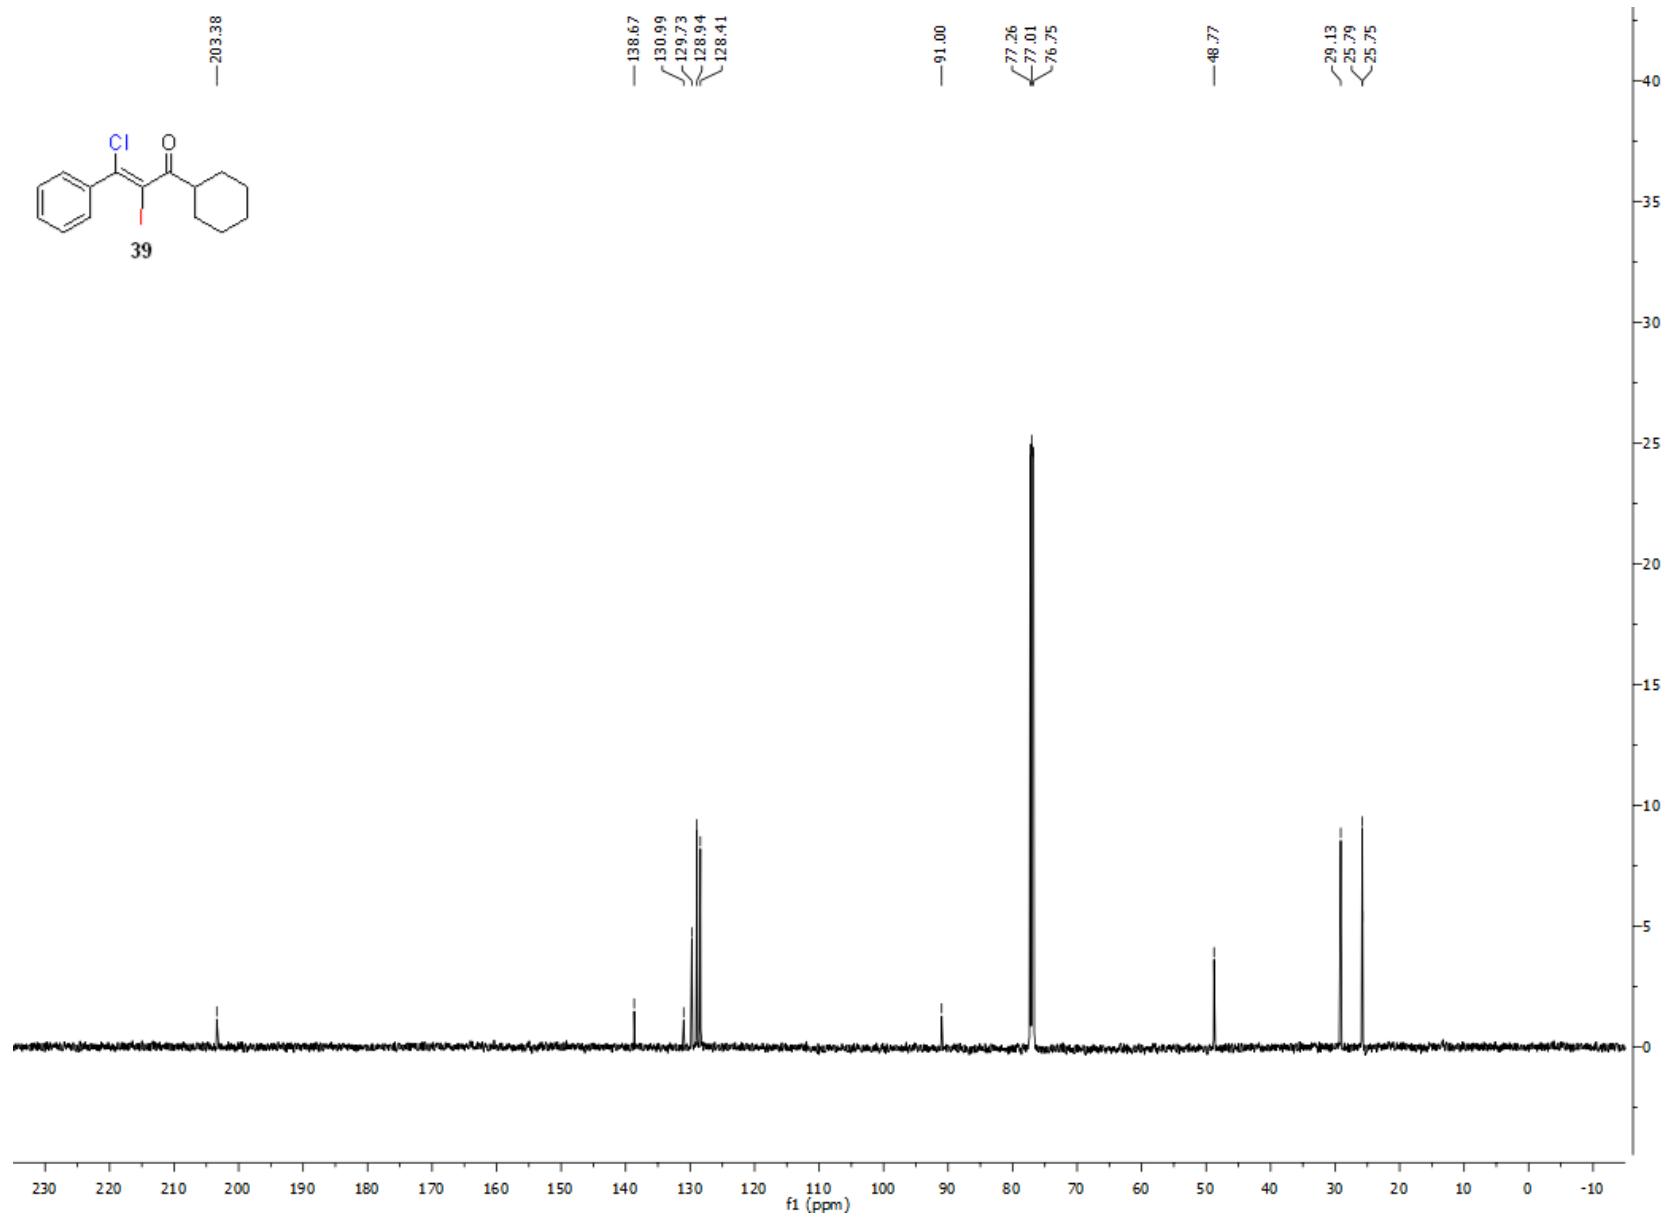

Figure S96. <sup>1</sup>H-NMR of 40

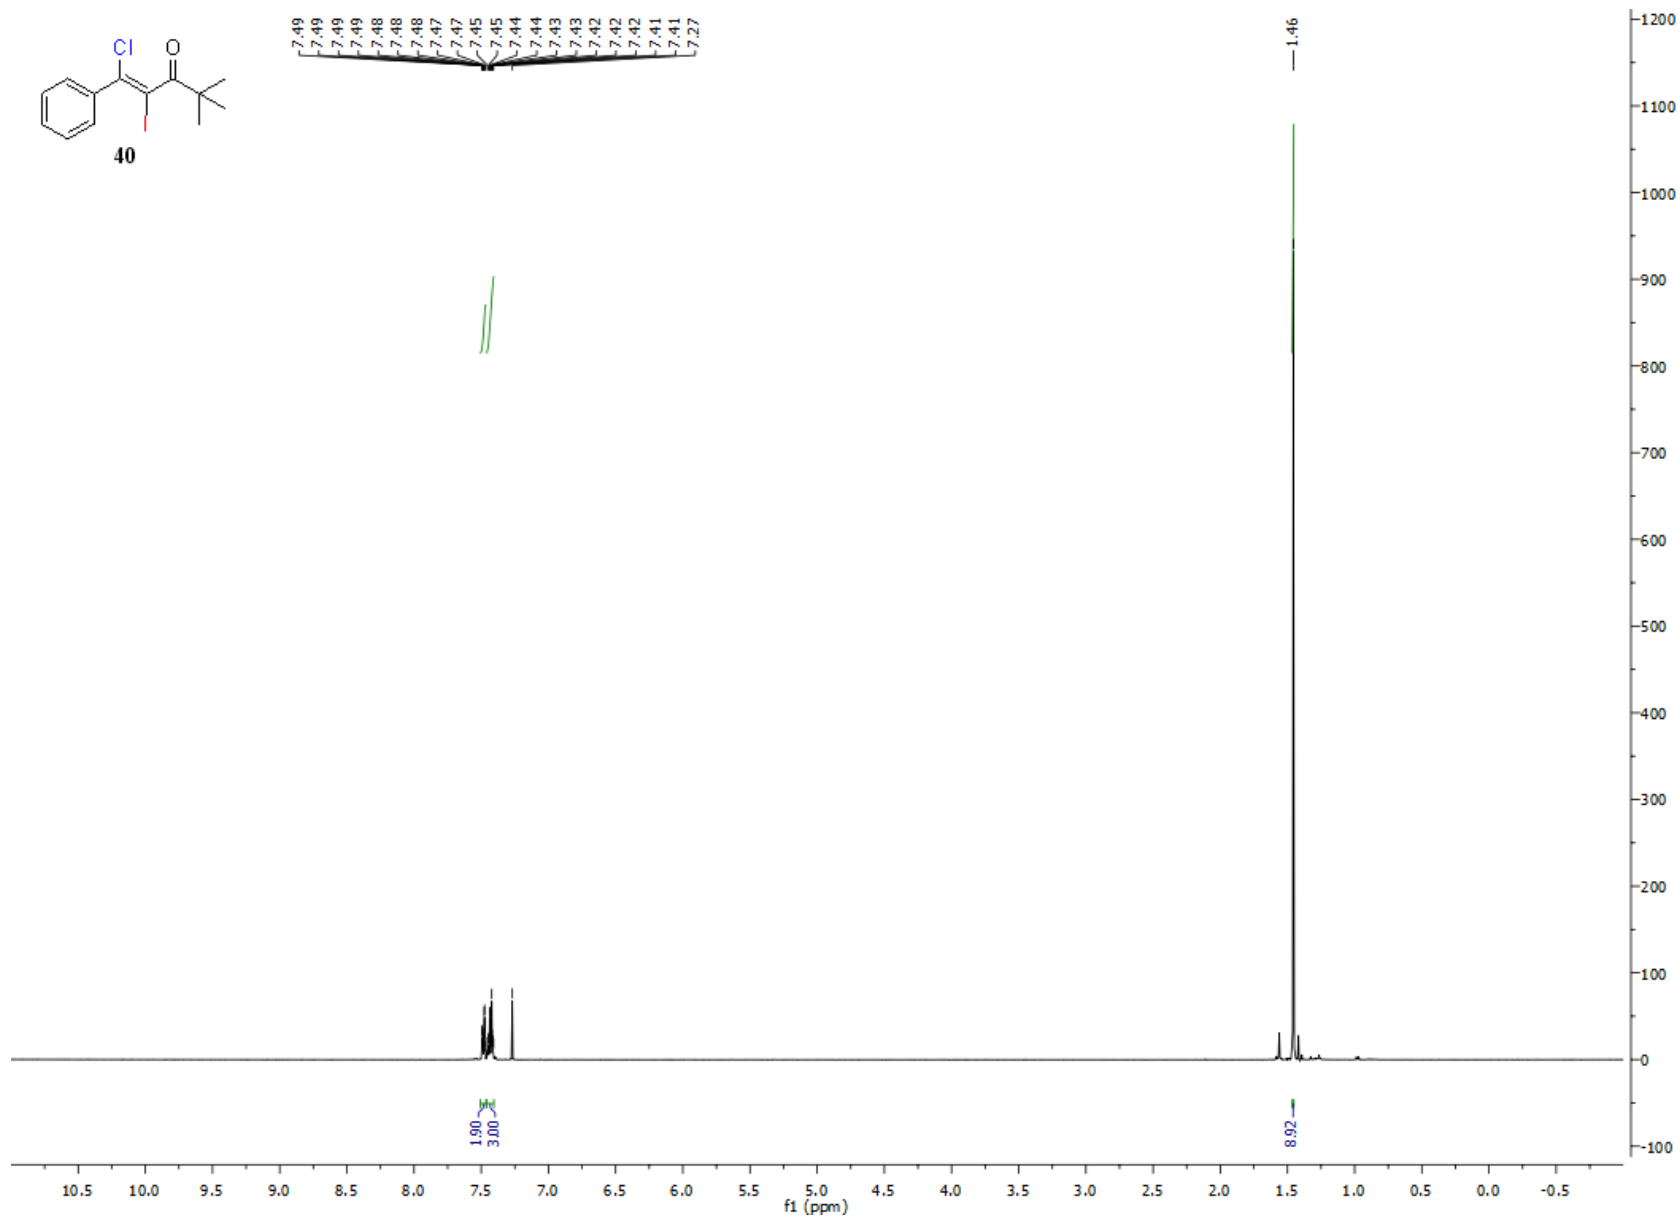

Figure S97.  $^{13}\text{C}$ -NMR of **40**

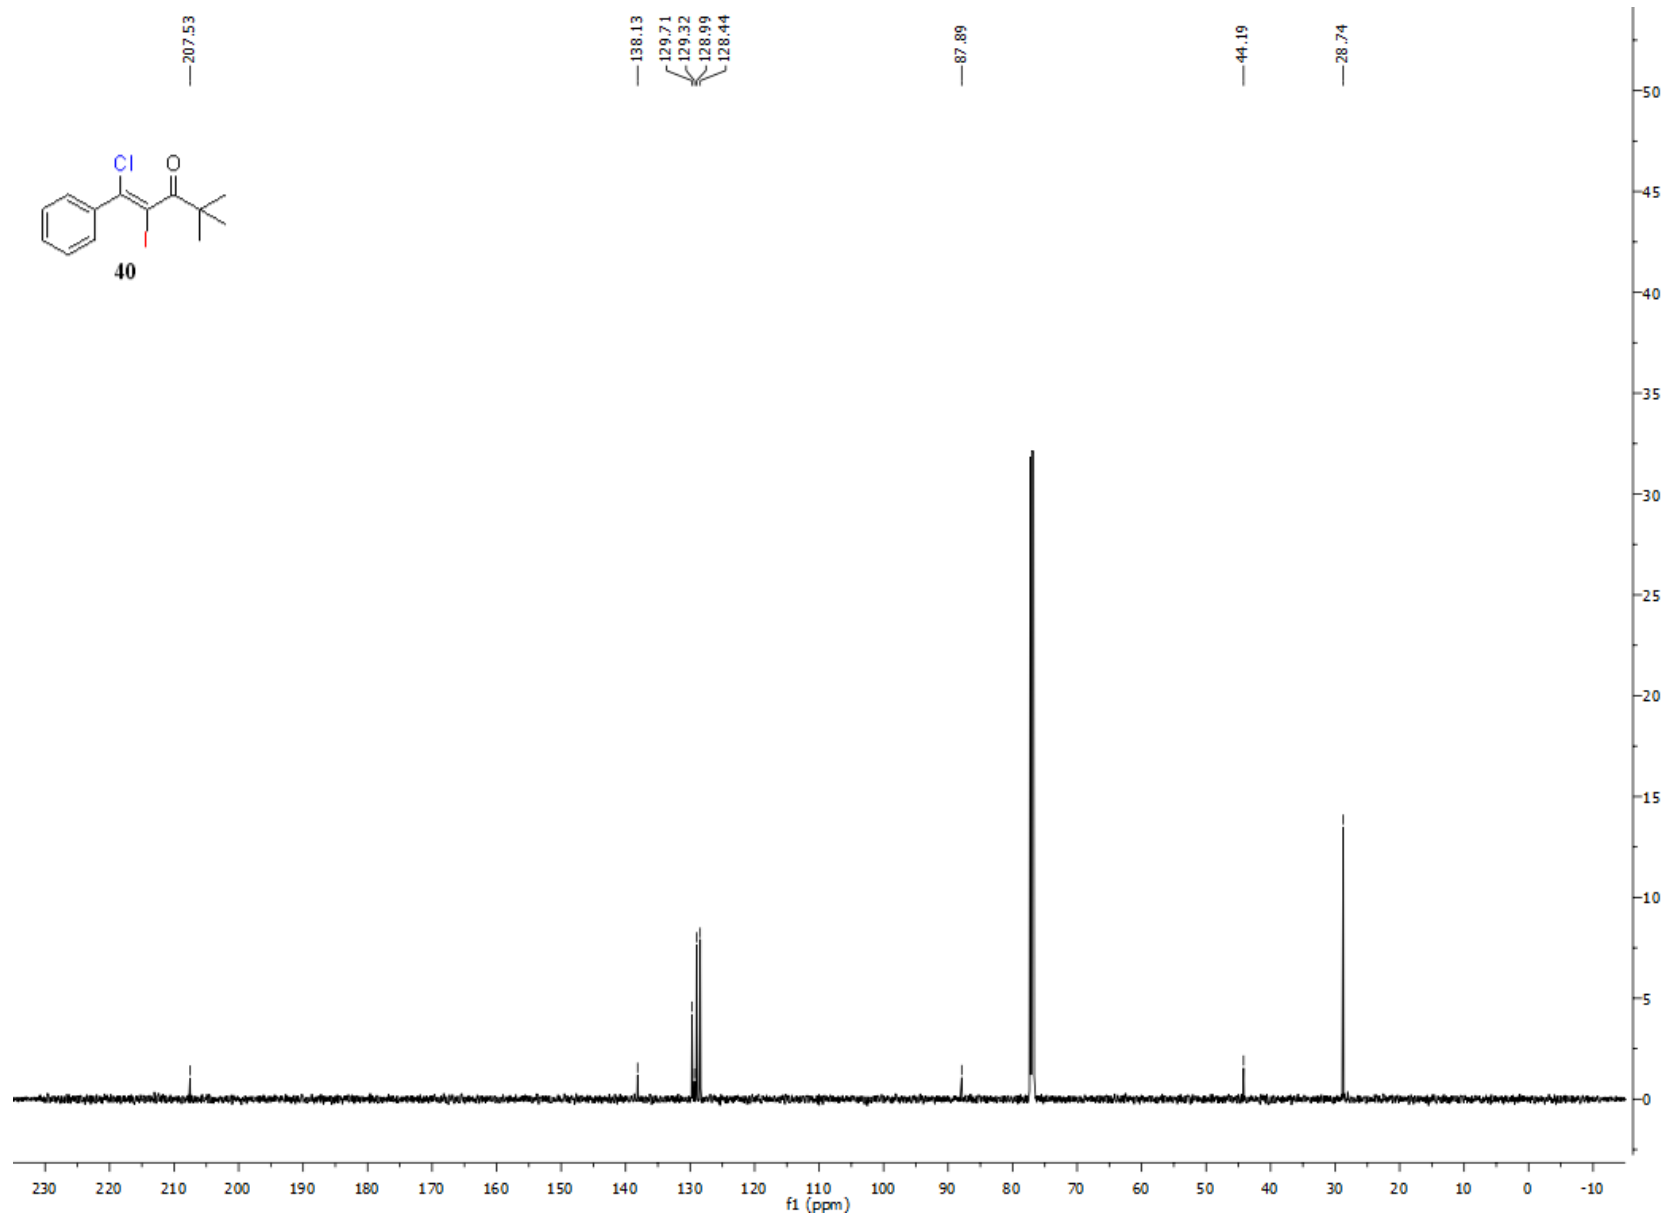

Figure S98. <sup>1</sup>H-NMR of 41

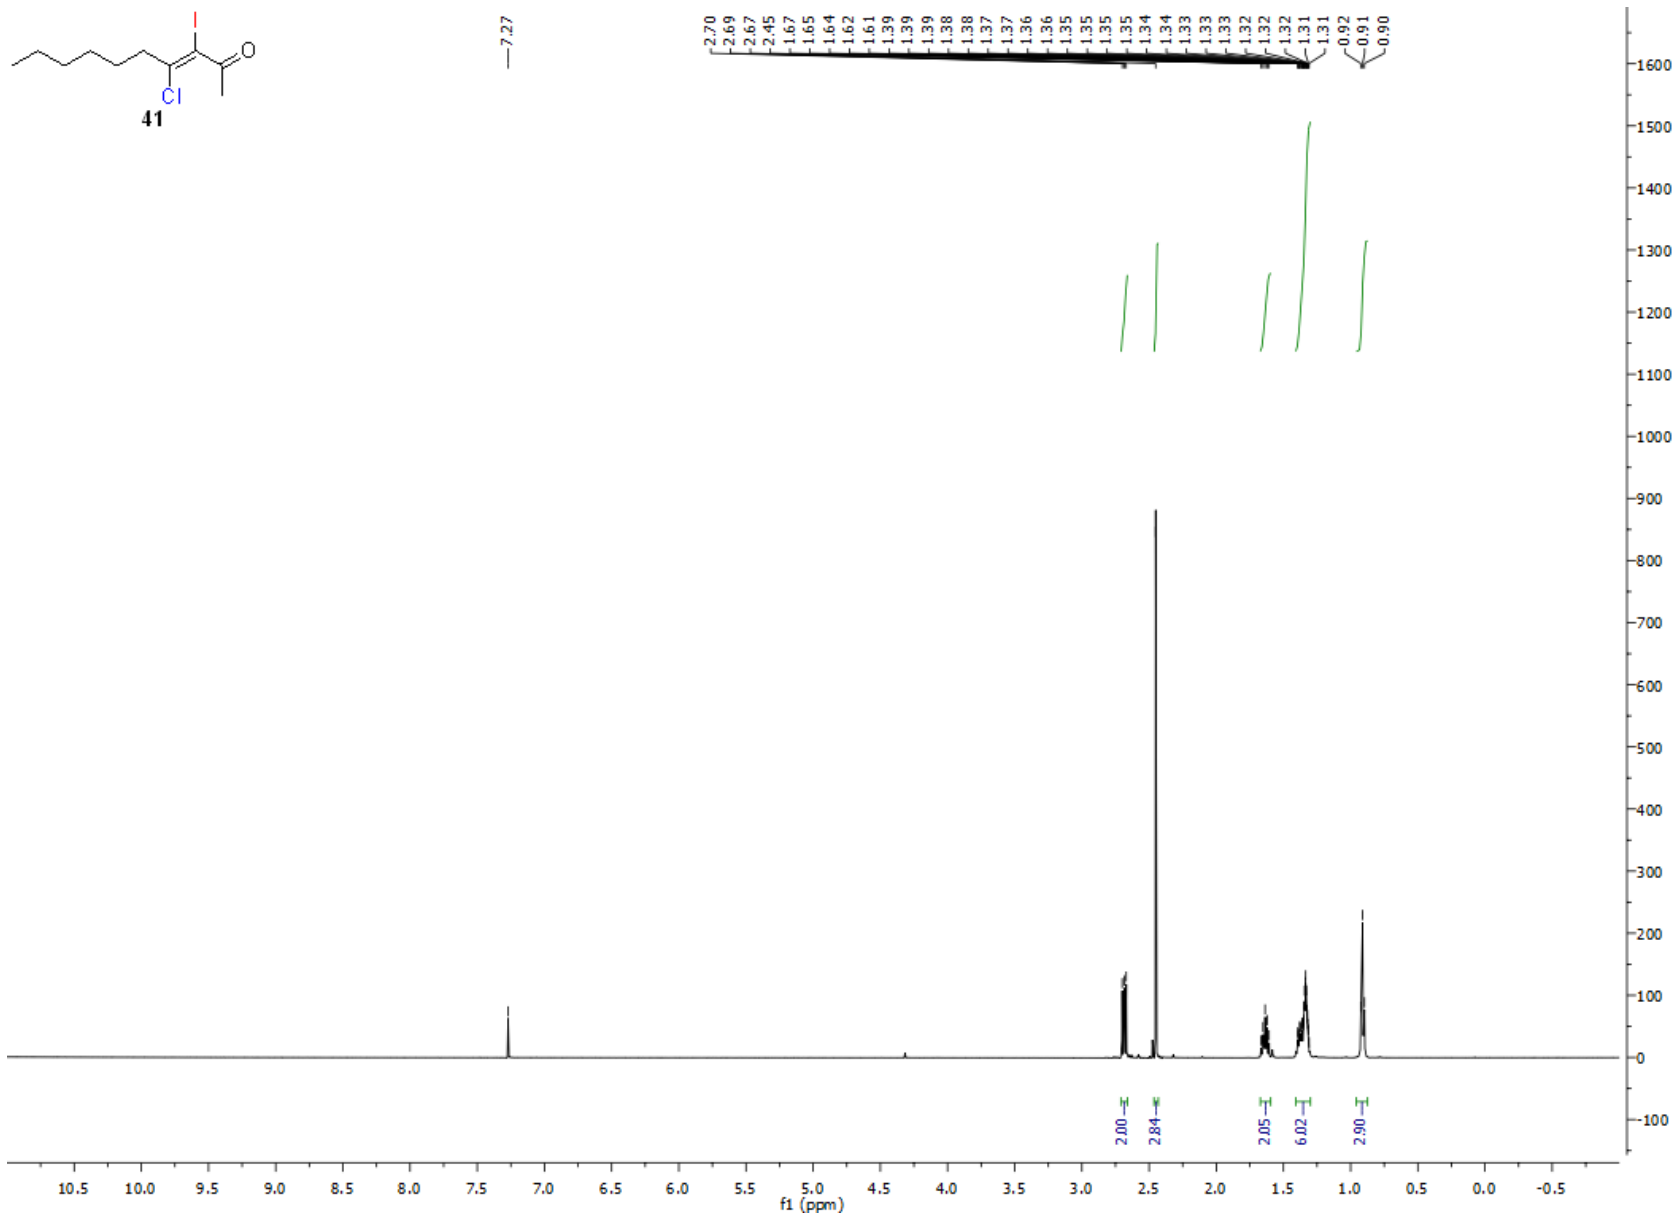



Figure S99.  $^{13}\text{C}$ -NMR of 41

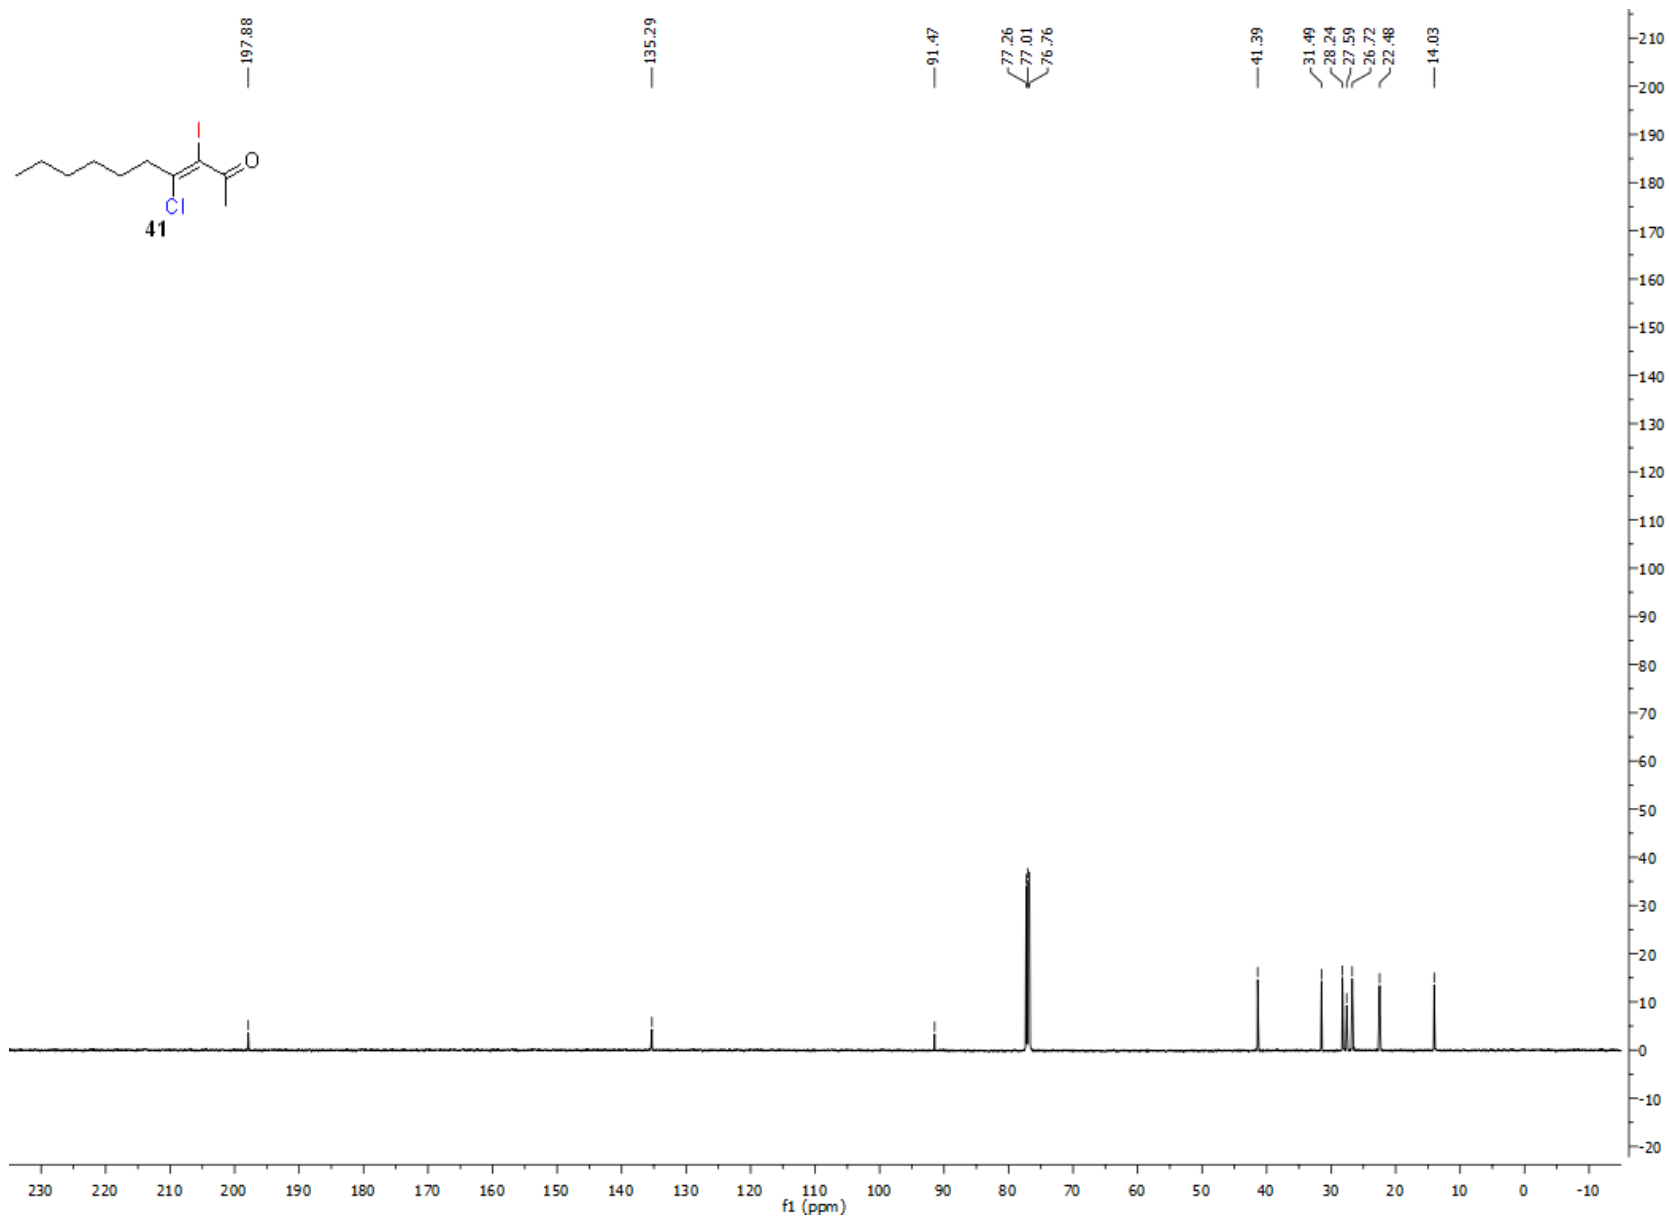

Figure S100. <sup>1</sup>H-NMR of 42

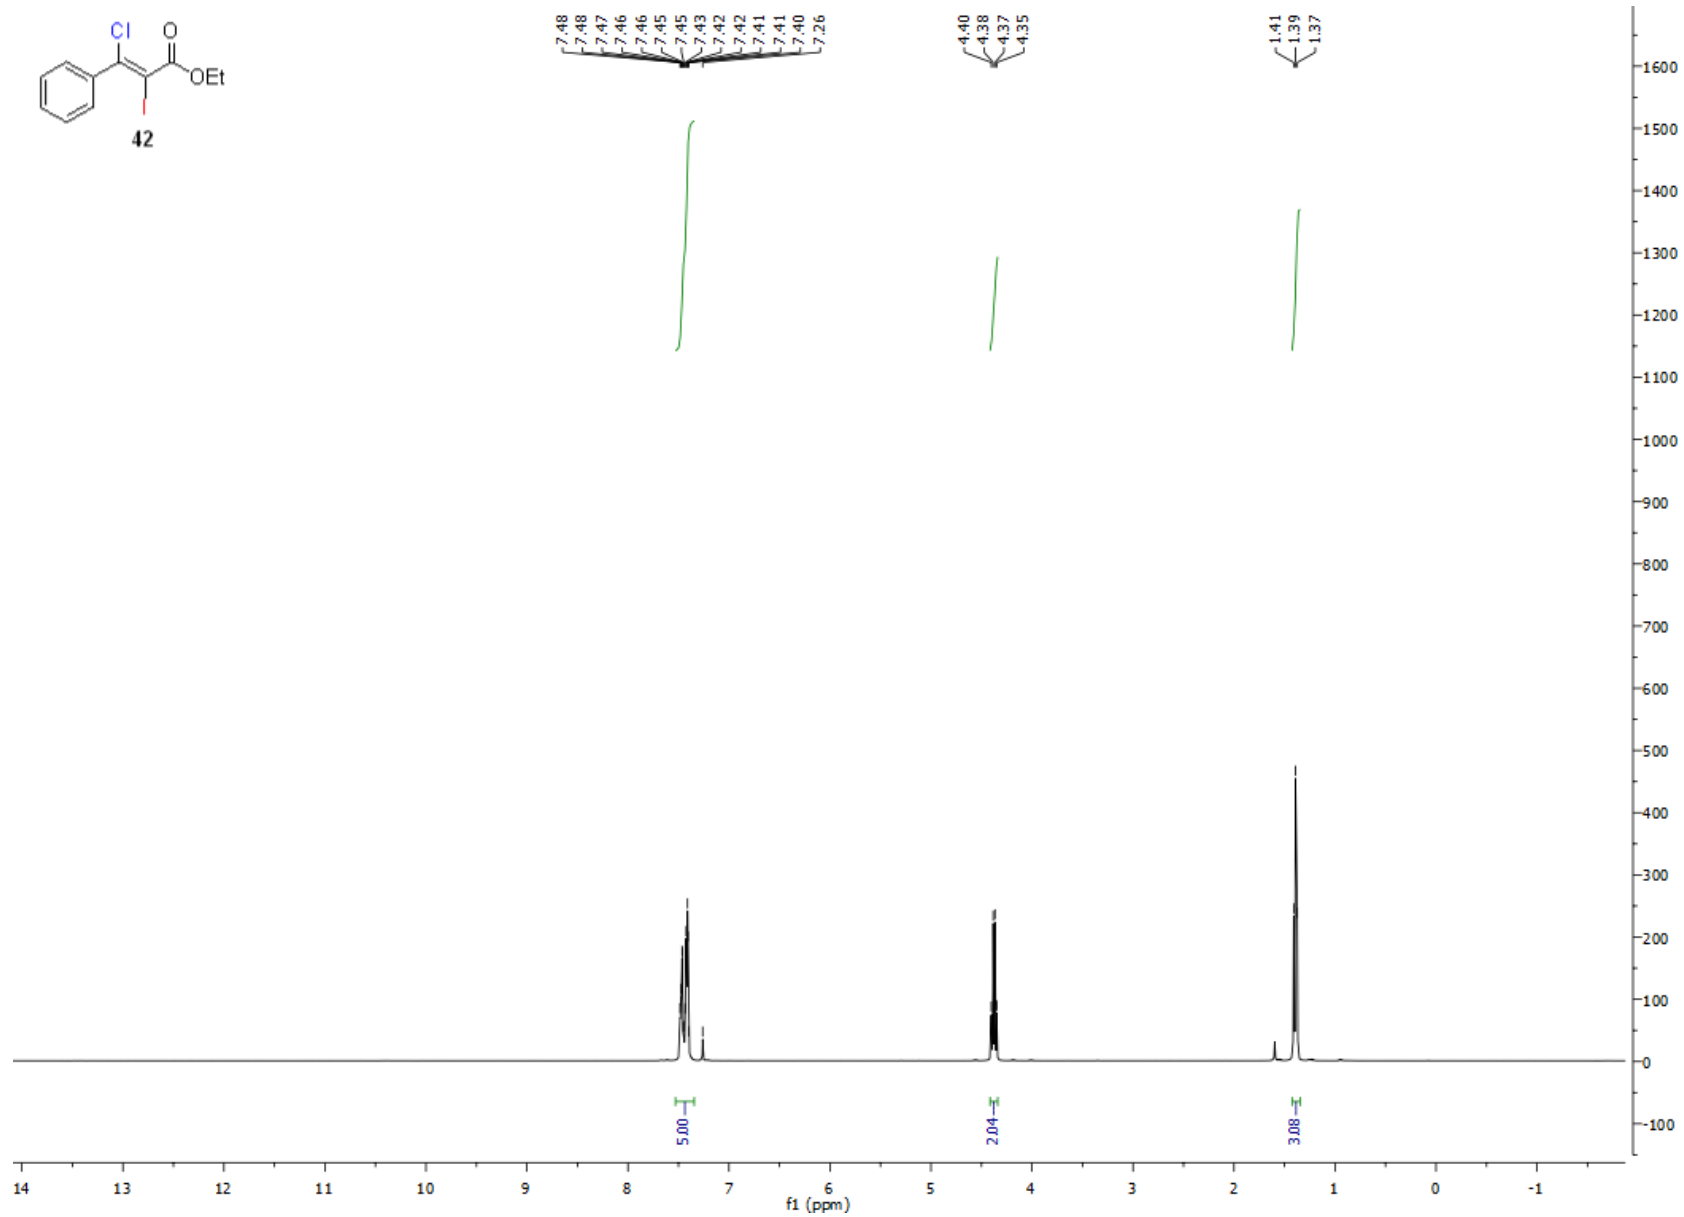

Figure S101.  $^{13}\text{C}$ -NMR of 42

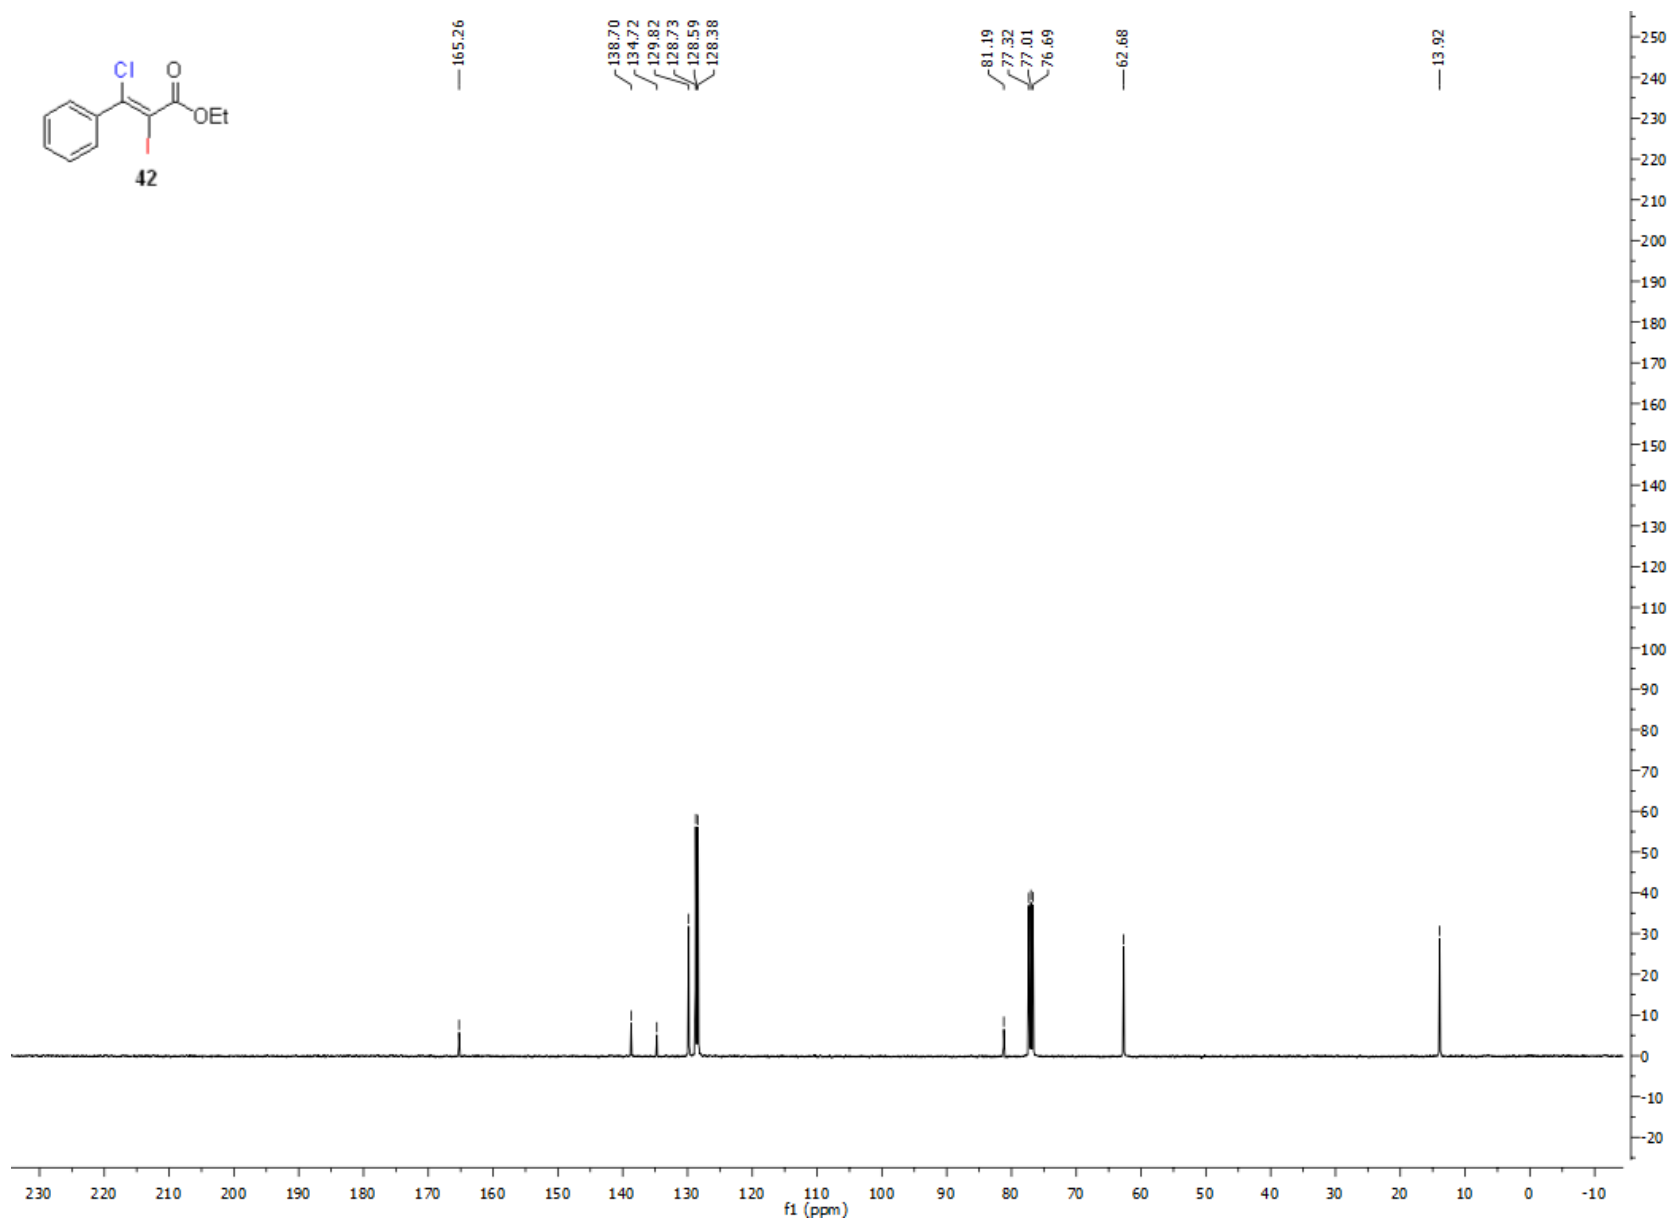

Figure S102. <sup>1</sup>H-NMR of 43

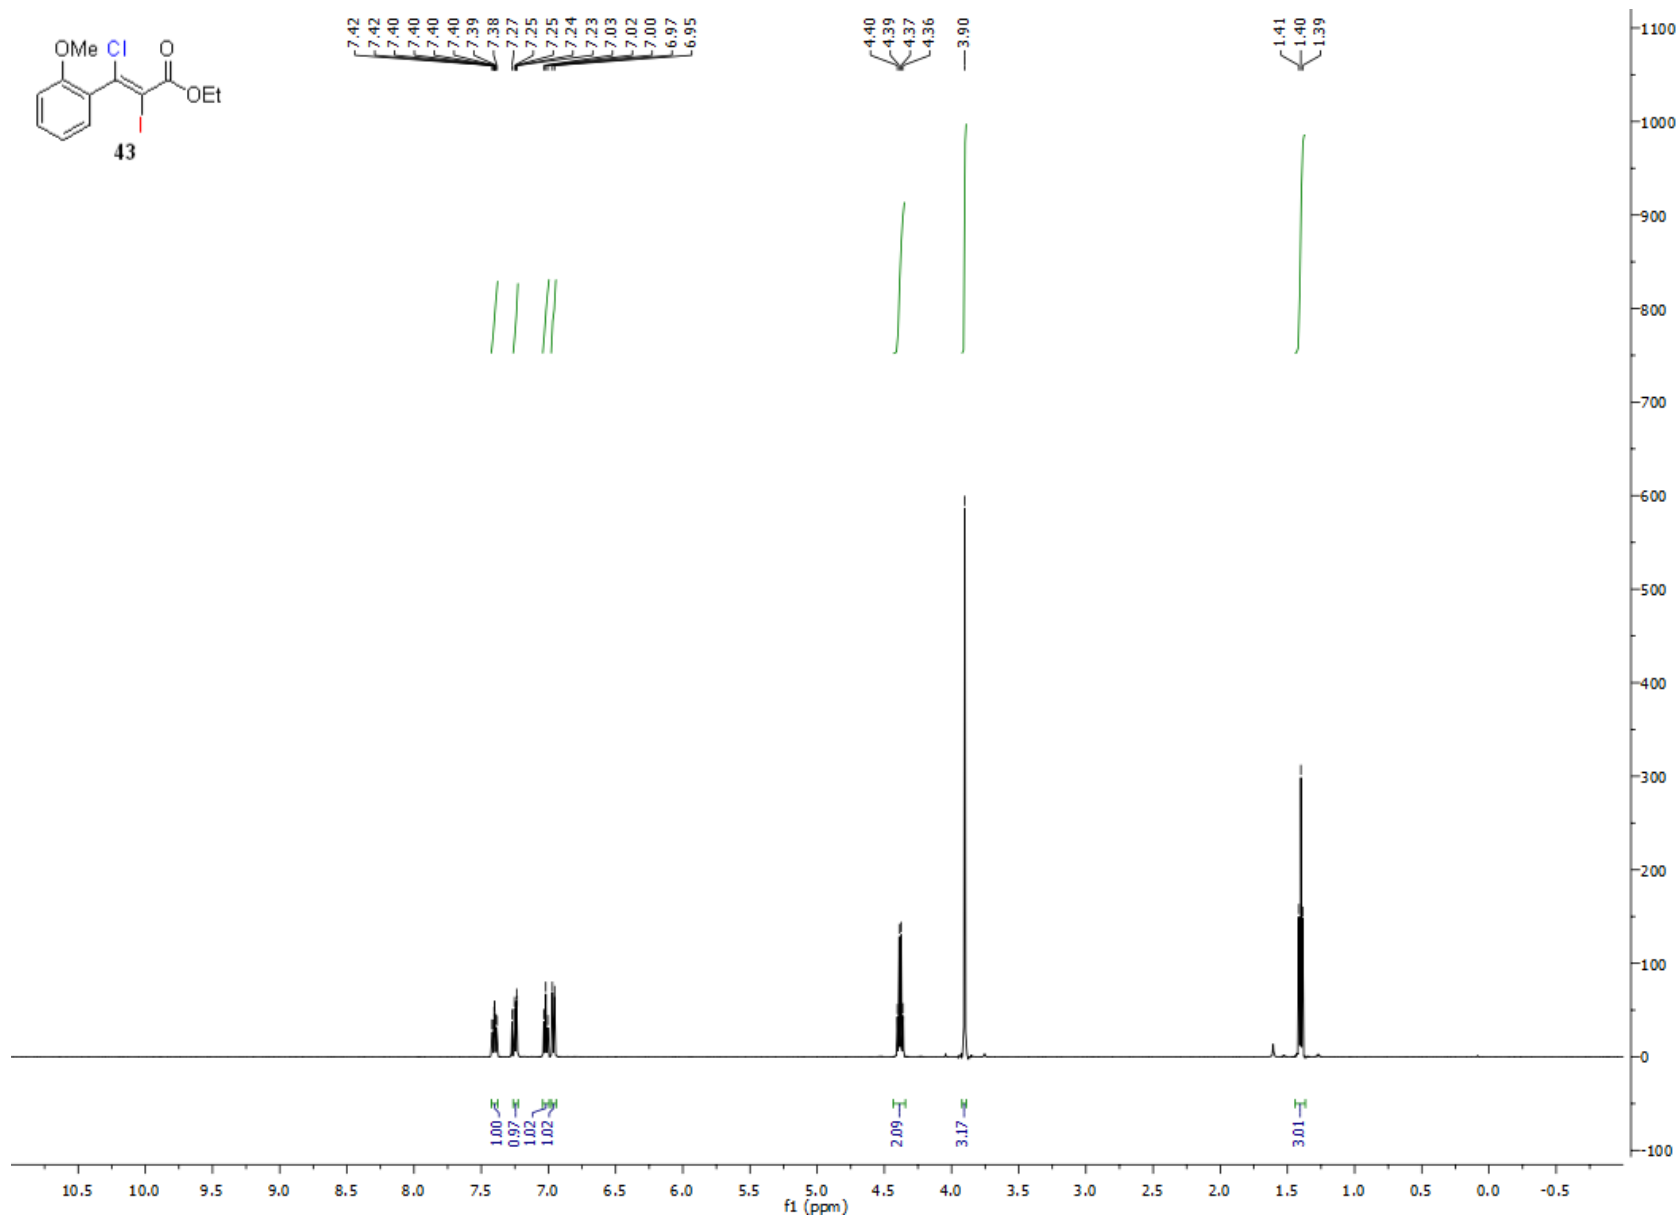

Figure S103.  $^{13}\text{C}$ -NMR of 43

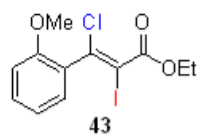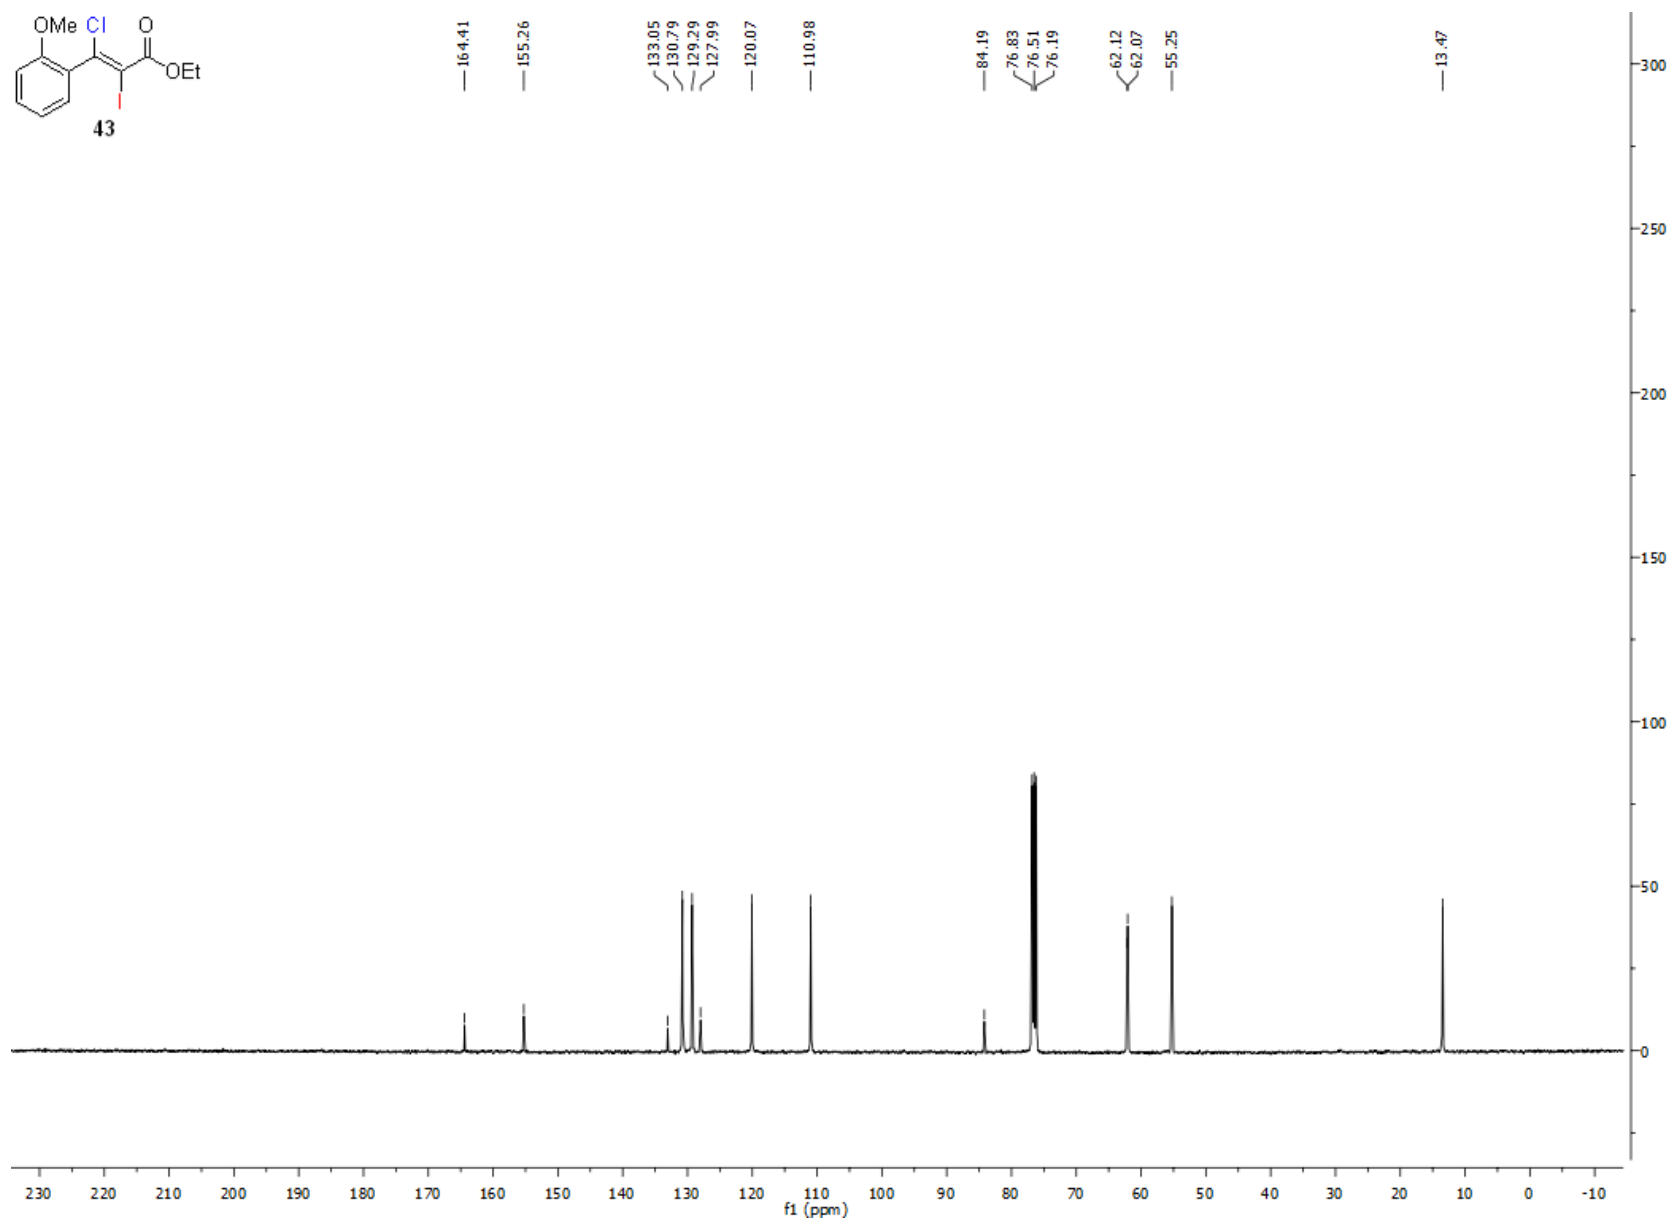

Figure S104. <sup>1</sup>H-NMR of 44

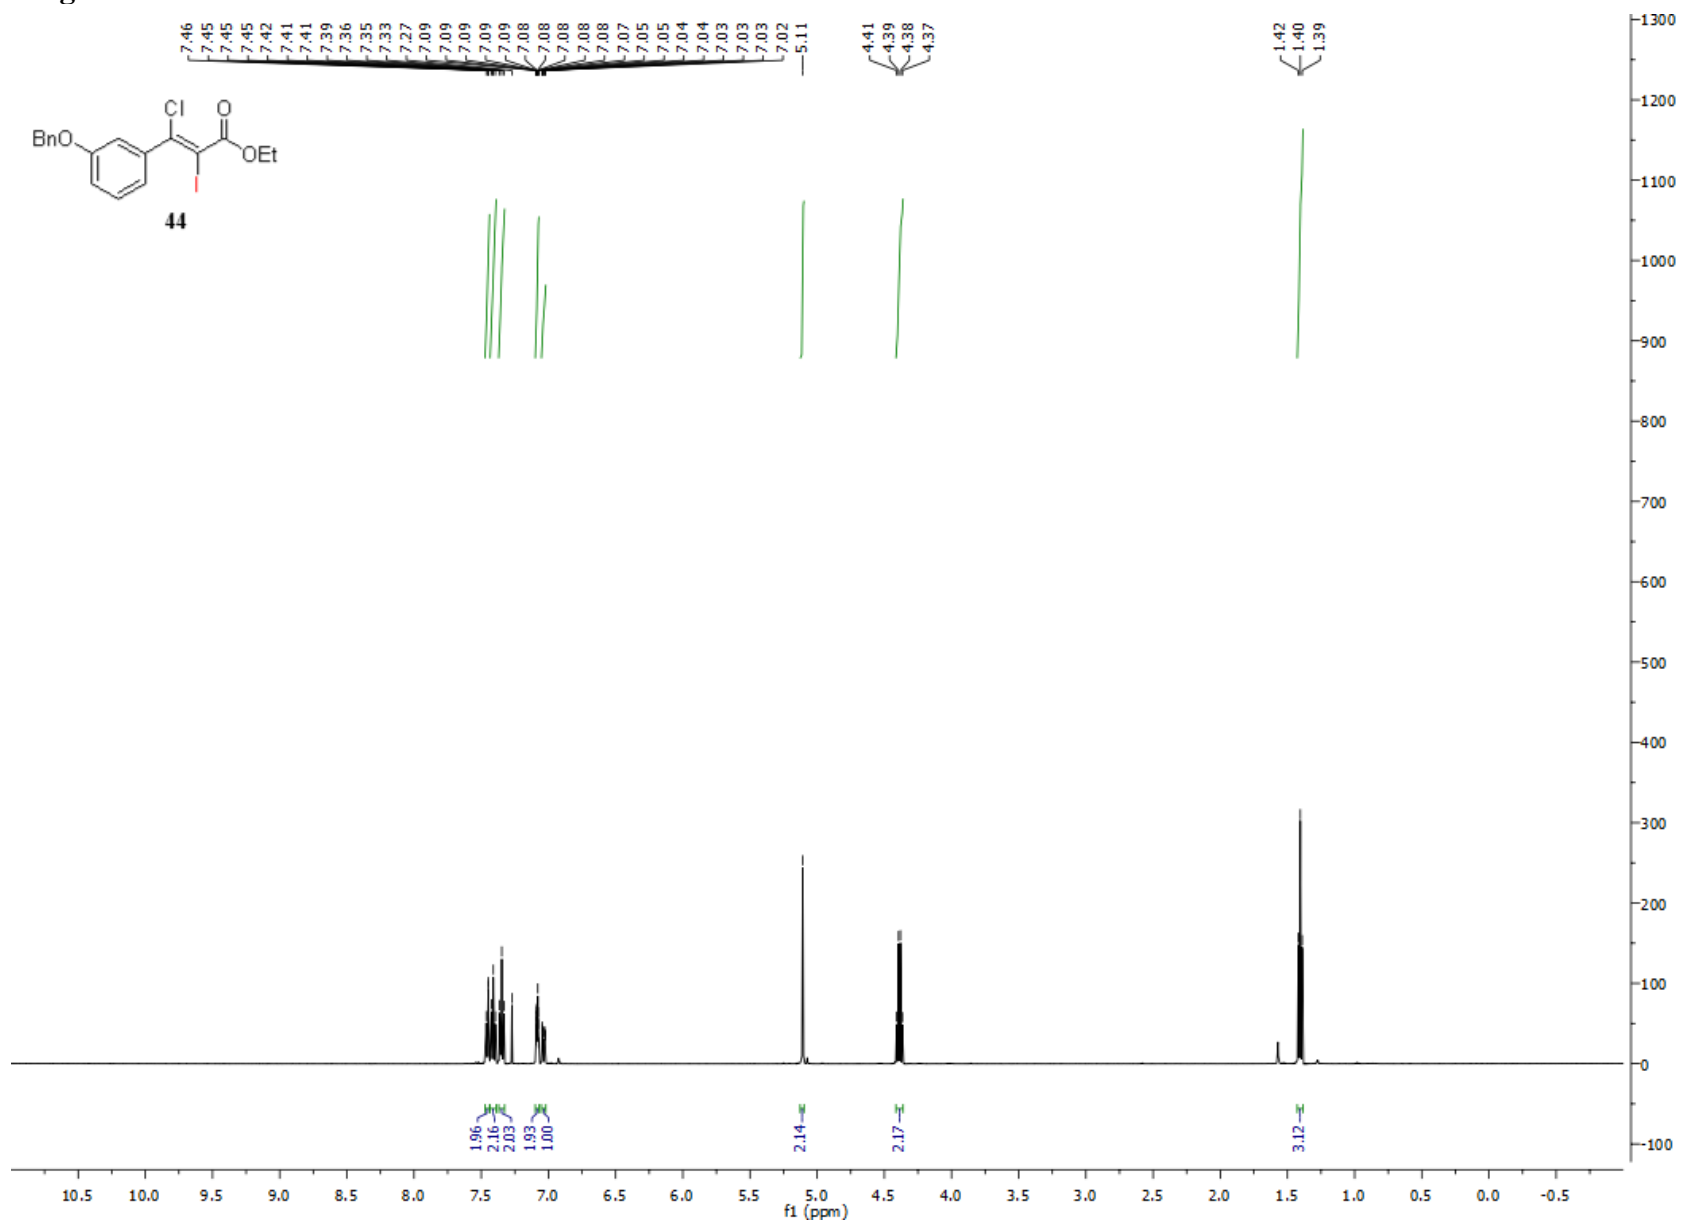

Figure S105. <sup>13</sup>C-NMR of 44

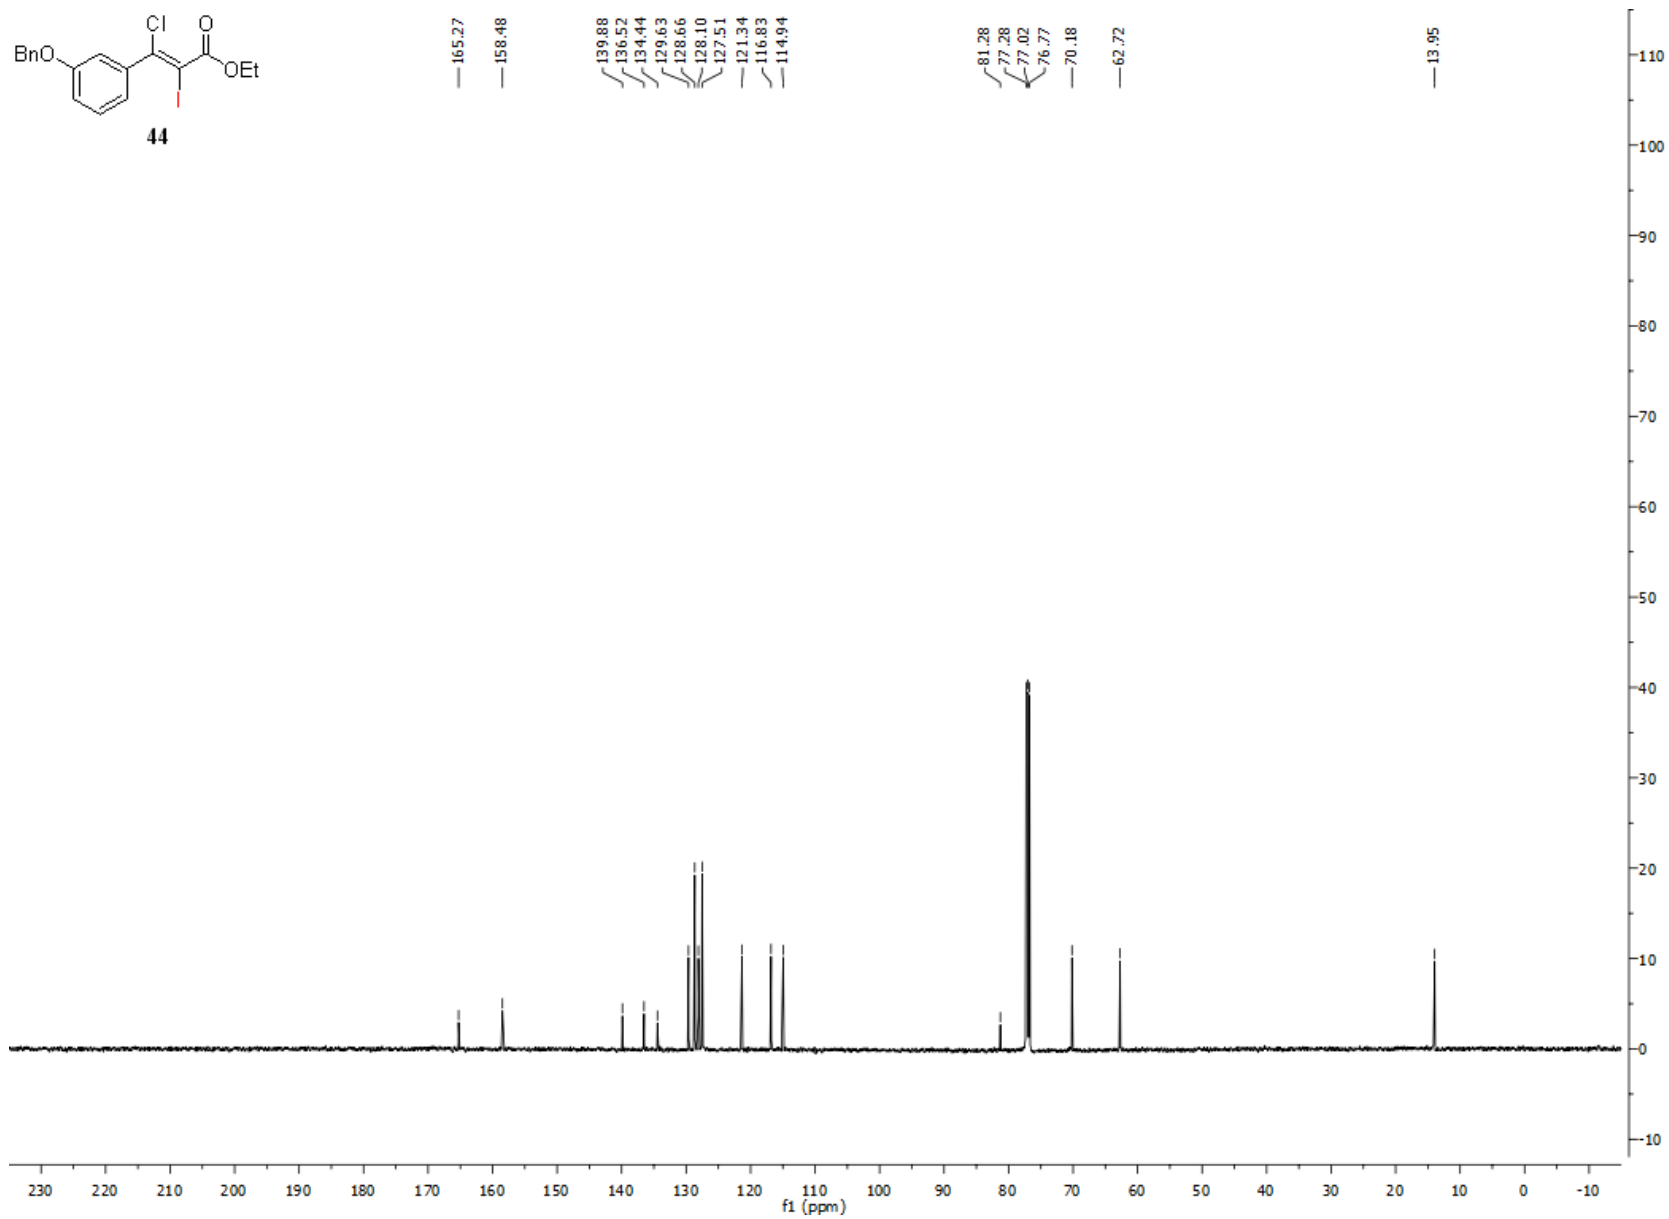

Figure S106. <sup>1</sup>H-NMR of 45

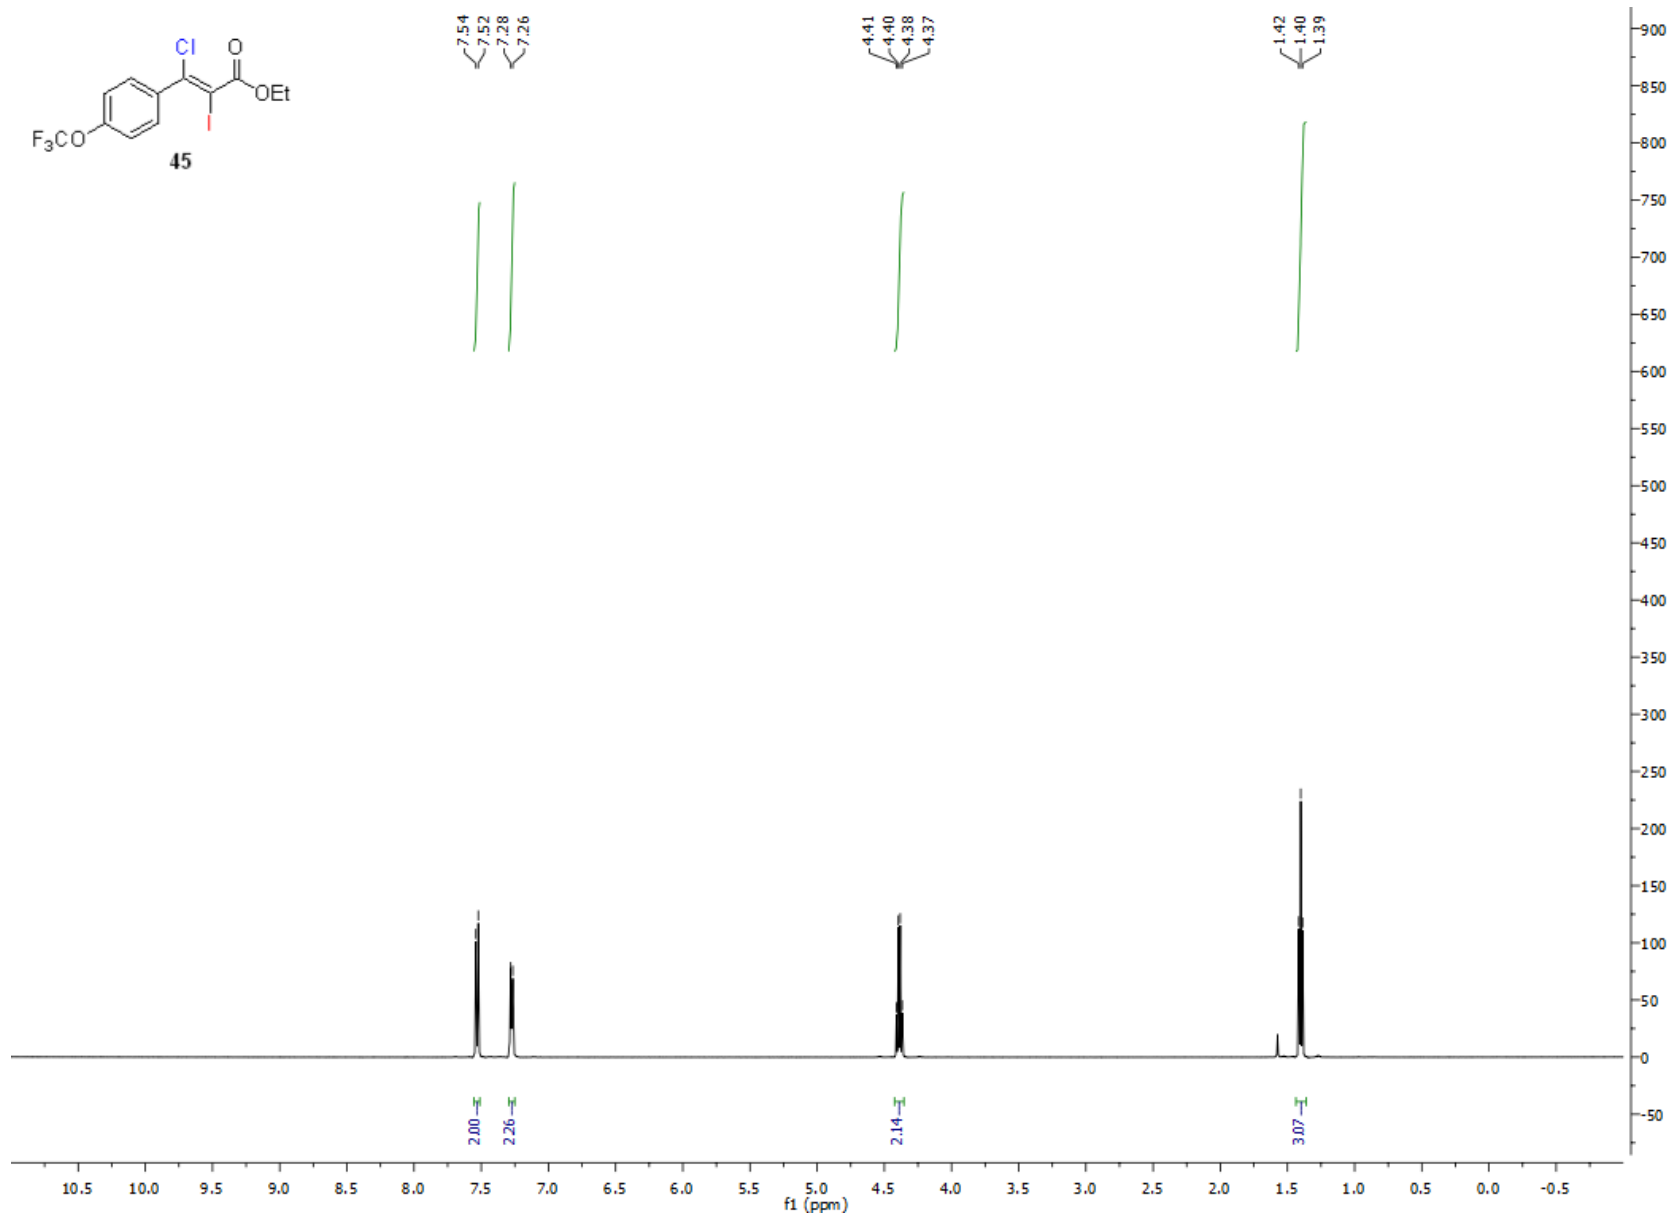



**Figure S107.**  $^{19}\text{F}$ -NMR of **45**

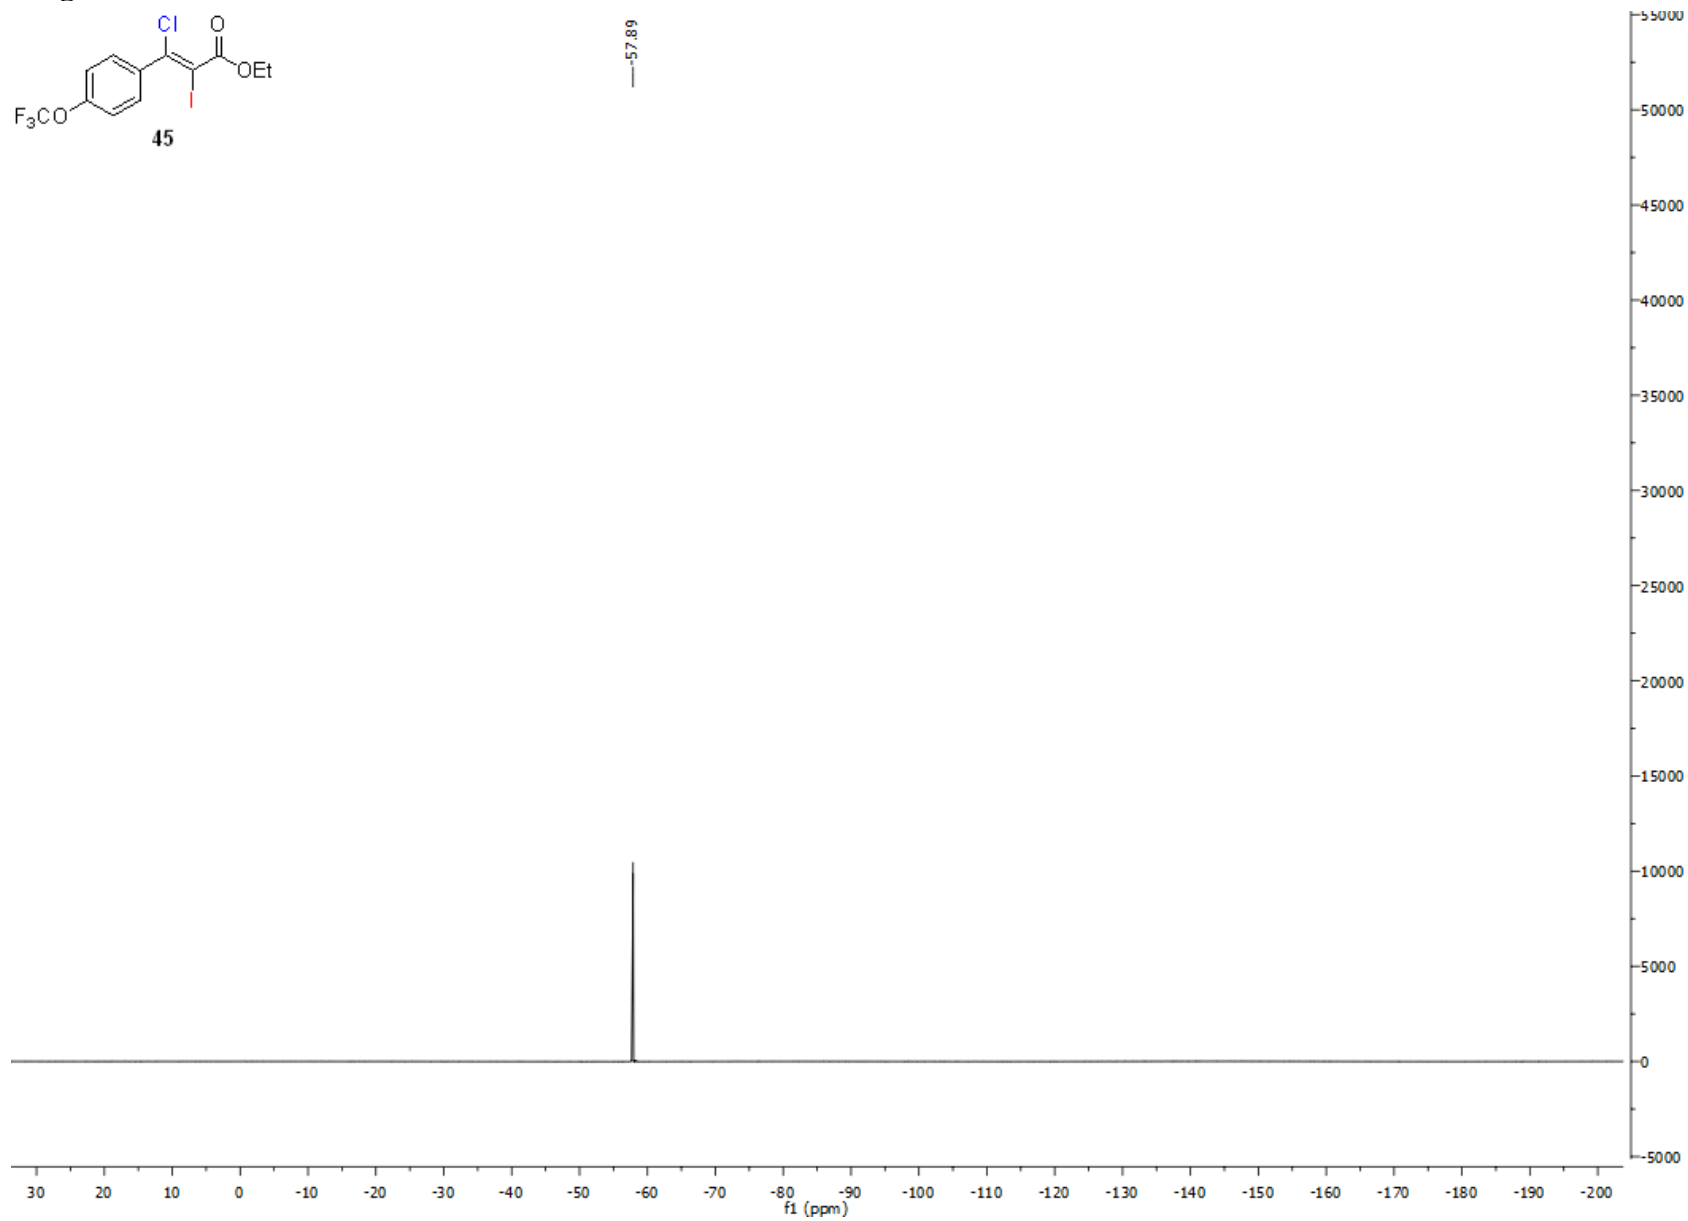

Figure S108.  $^{13}\text{C}$ -NMR of 45

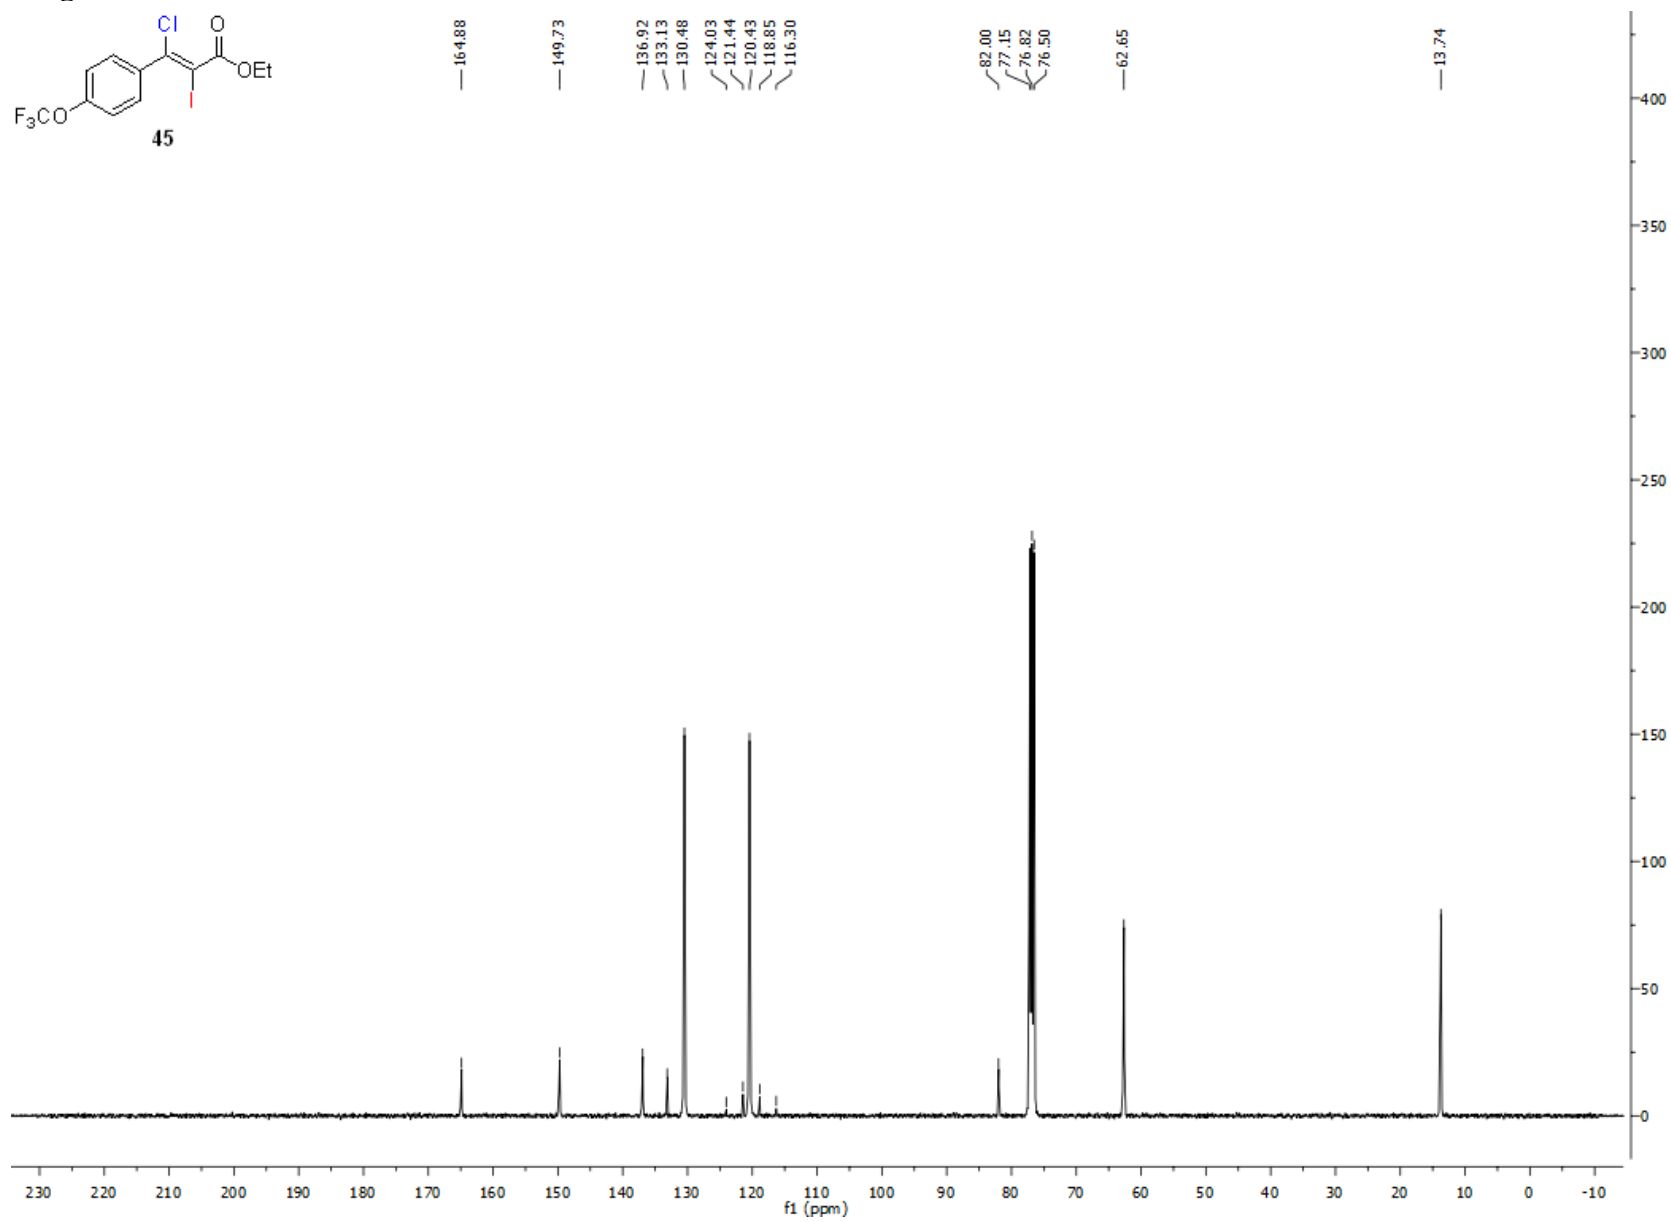

Figure S109. <sup>1</sup>H-NMR of 46

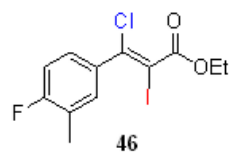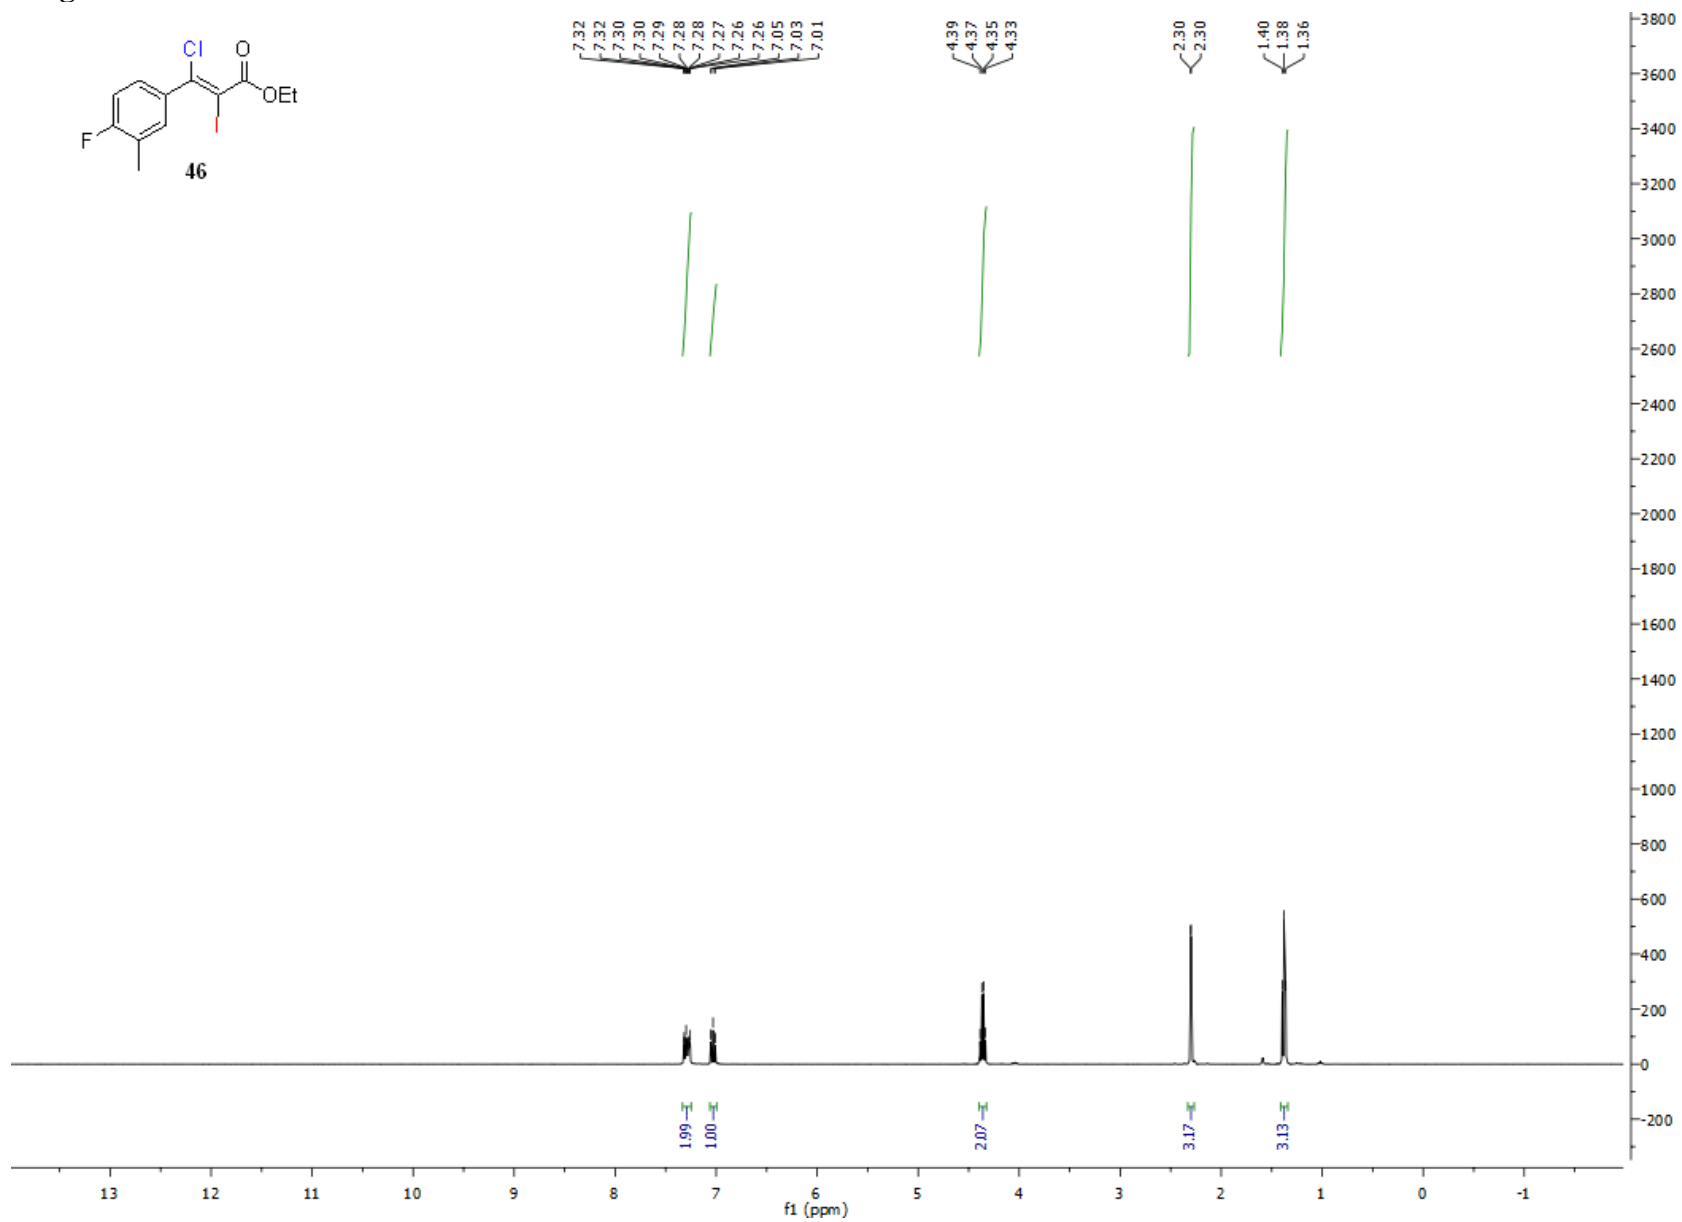

Figure S110.  $^{19}\text{F}$ -NMR of 46

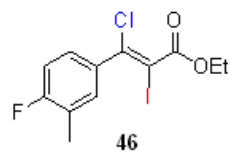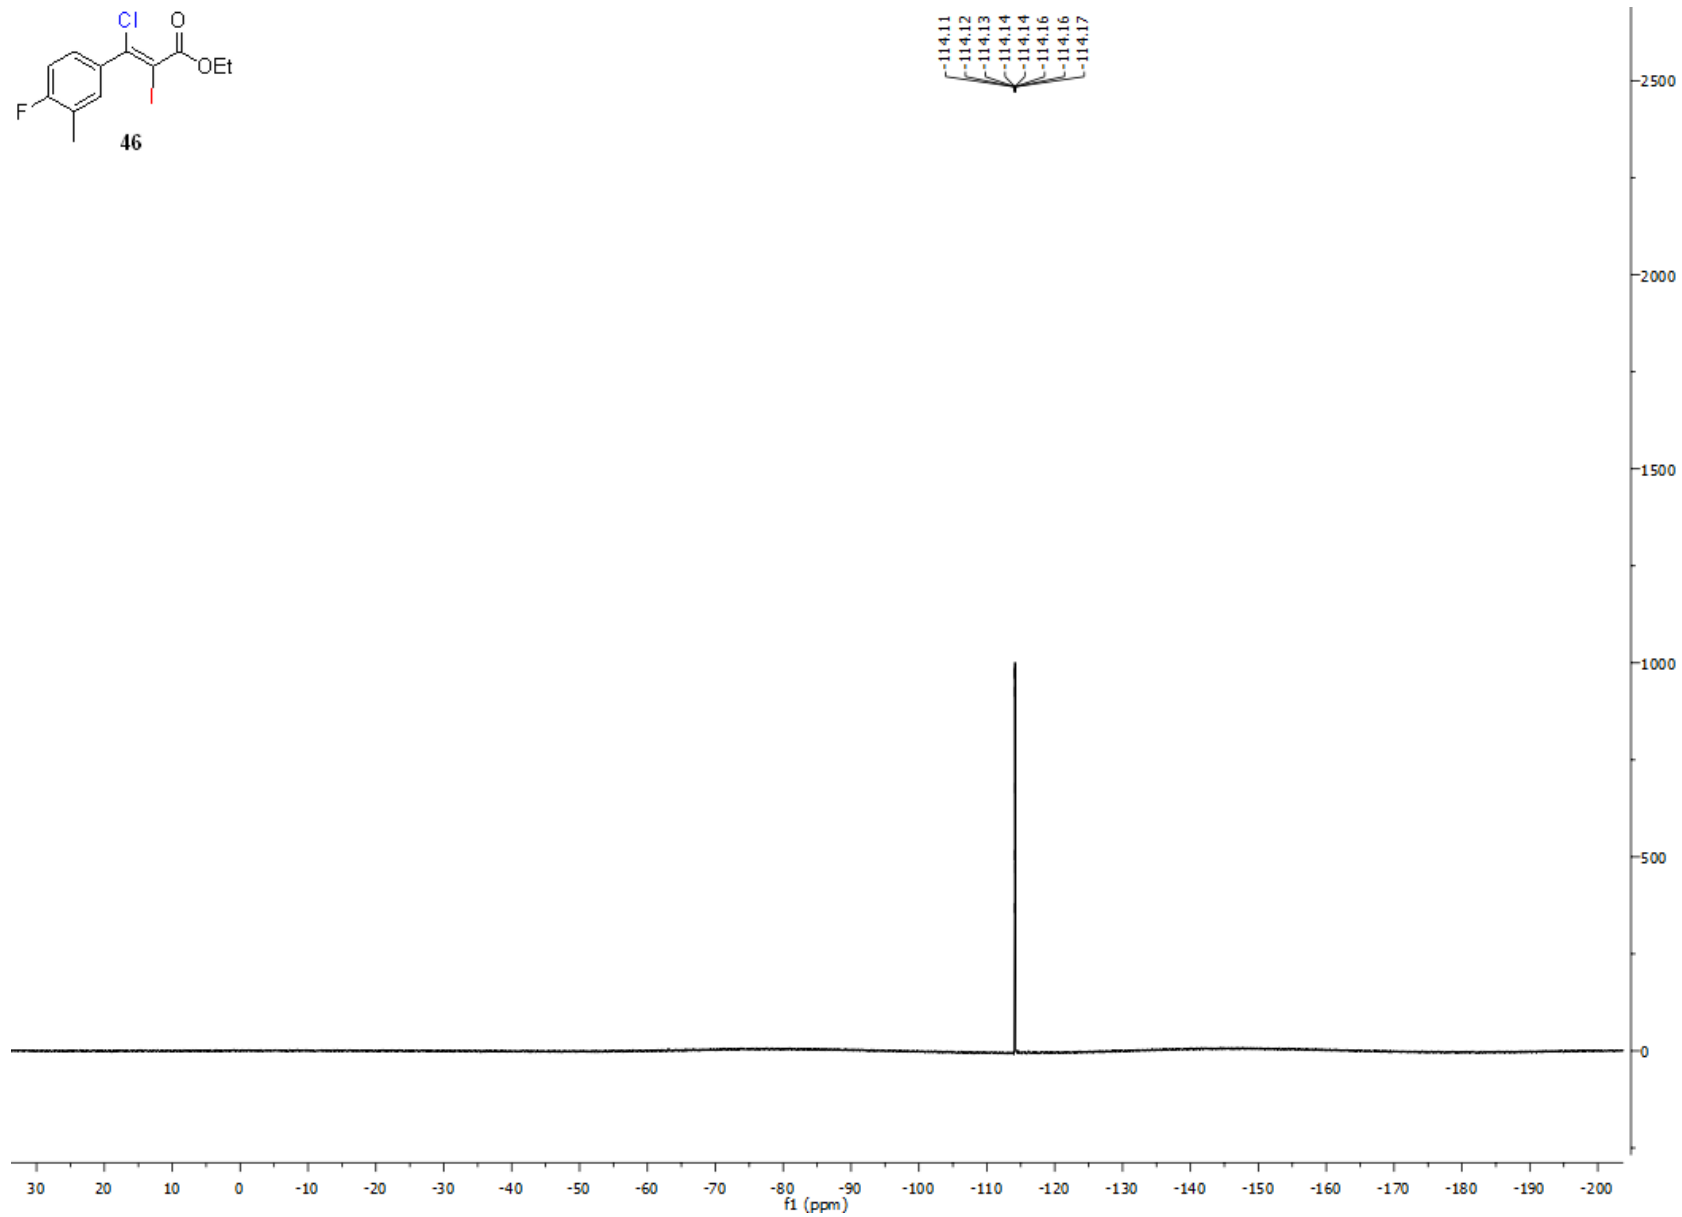

Figure S111.  $^{13}\text{C}$ -NMR of 46

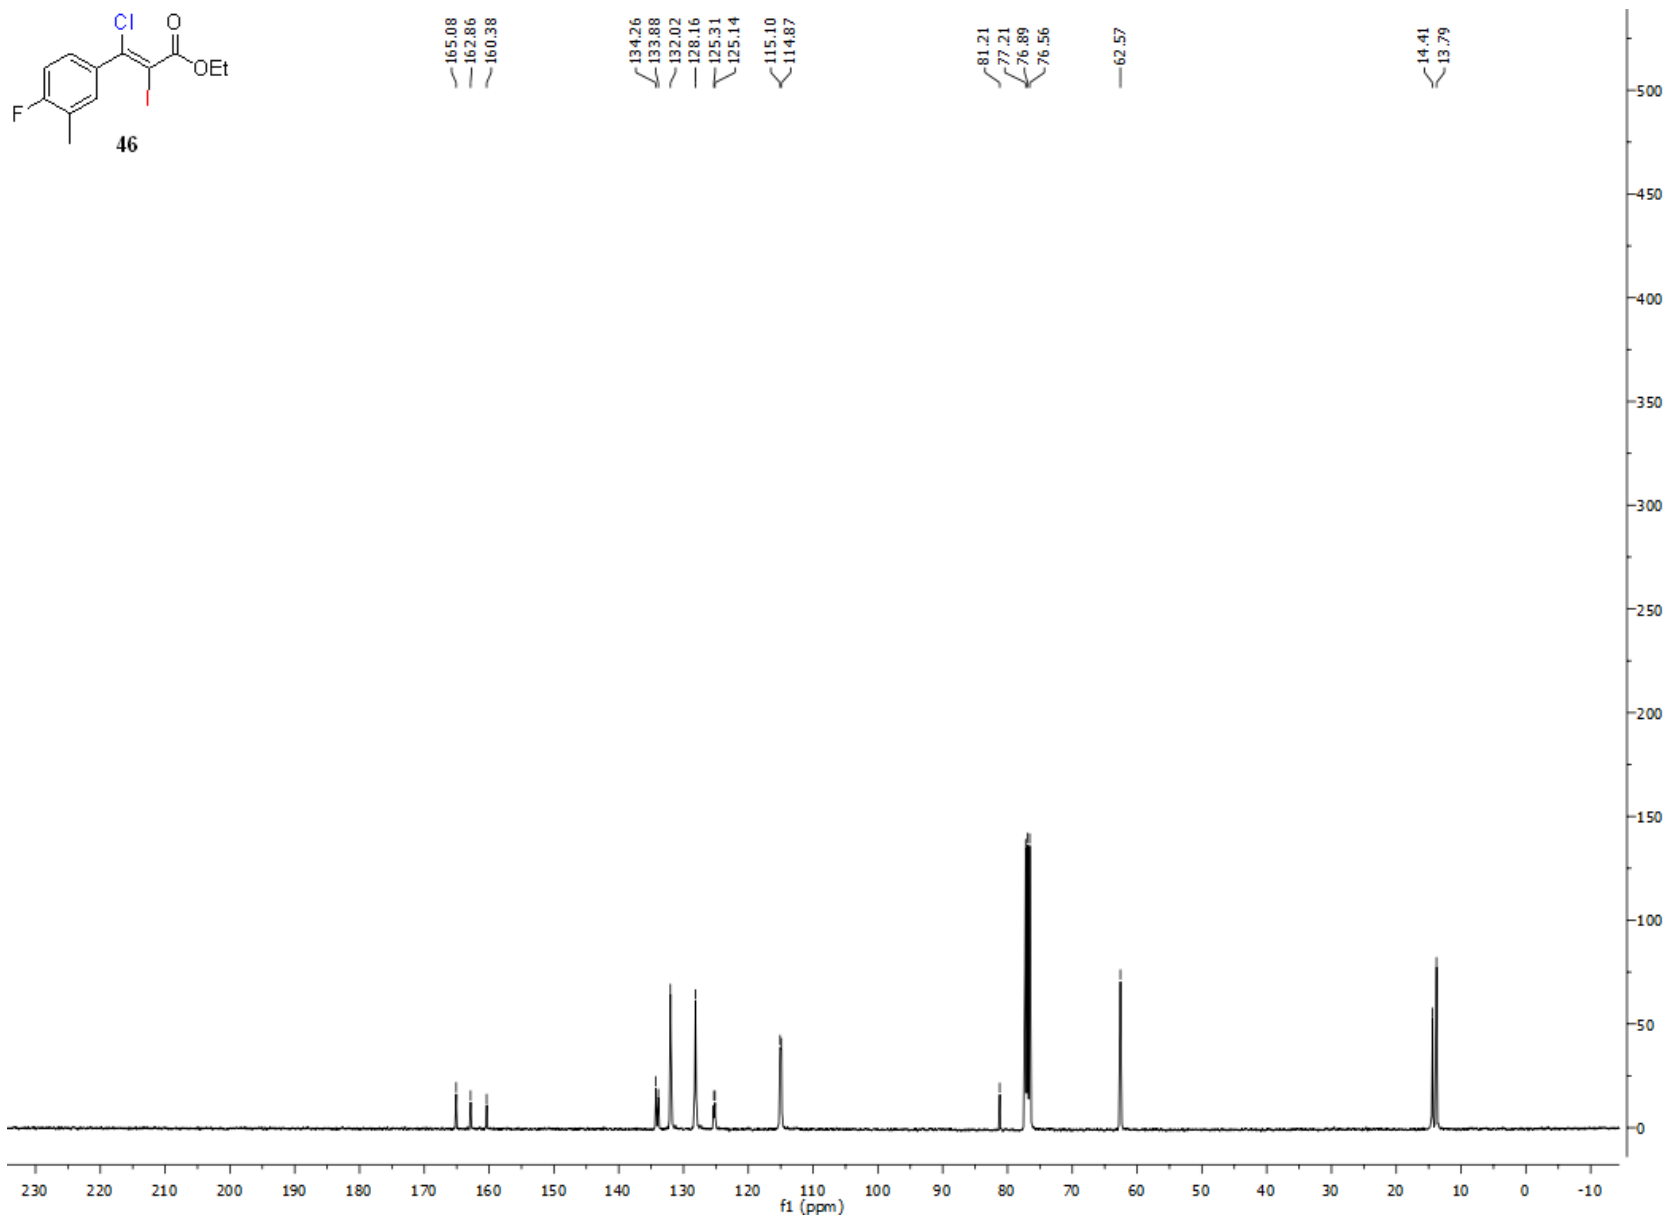

Figure S112. <sup>1</sup>H-NMR of 47

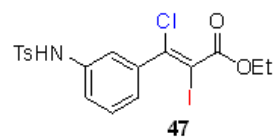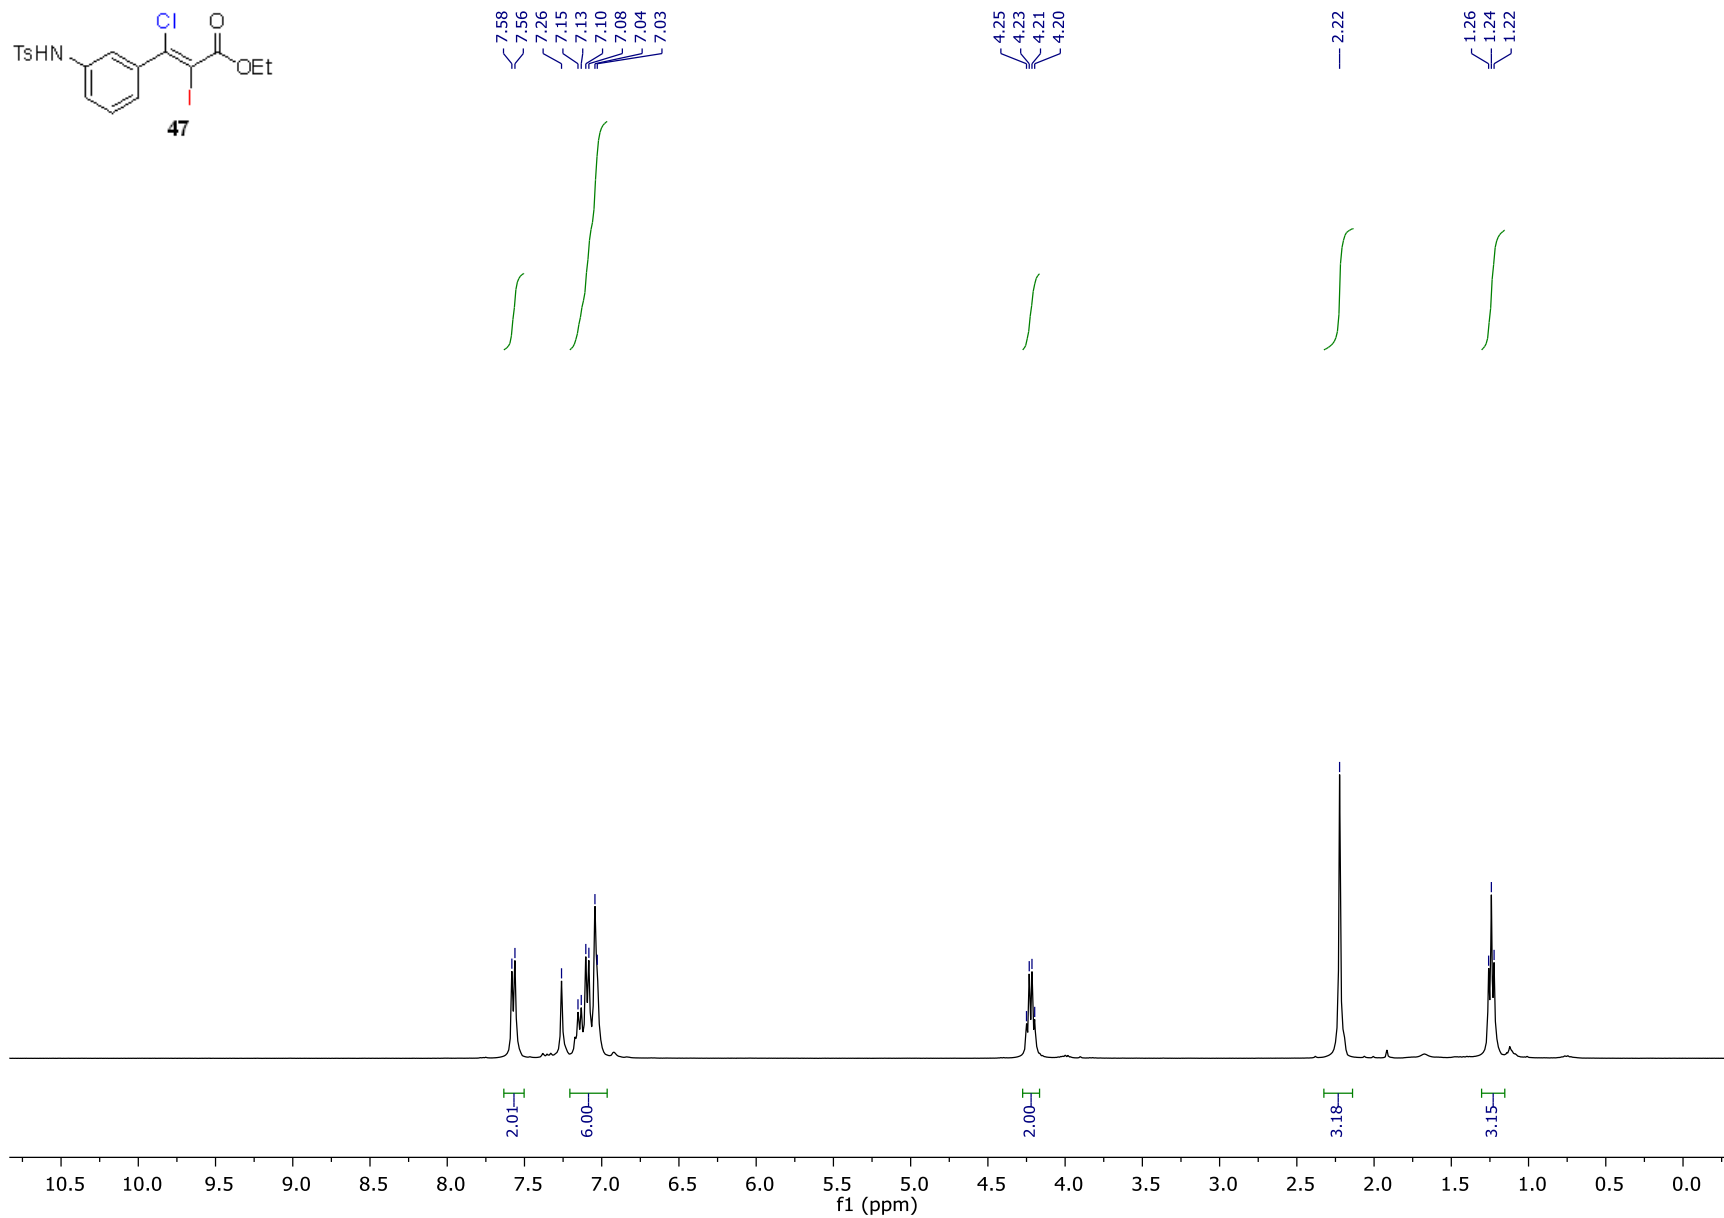

Figure S113.  $^{13}\text{C}$ -NMR of **47**

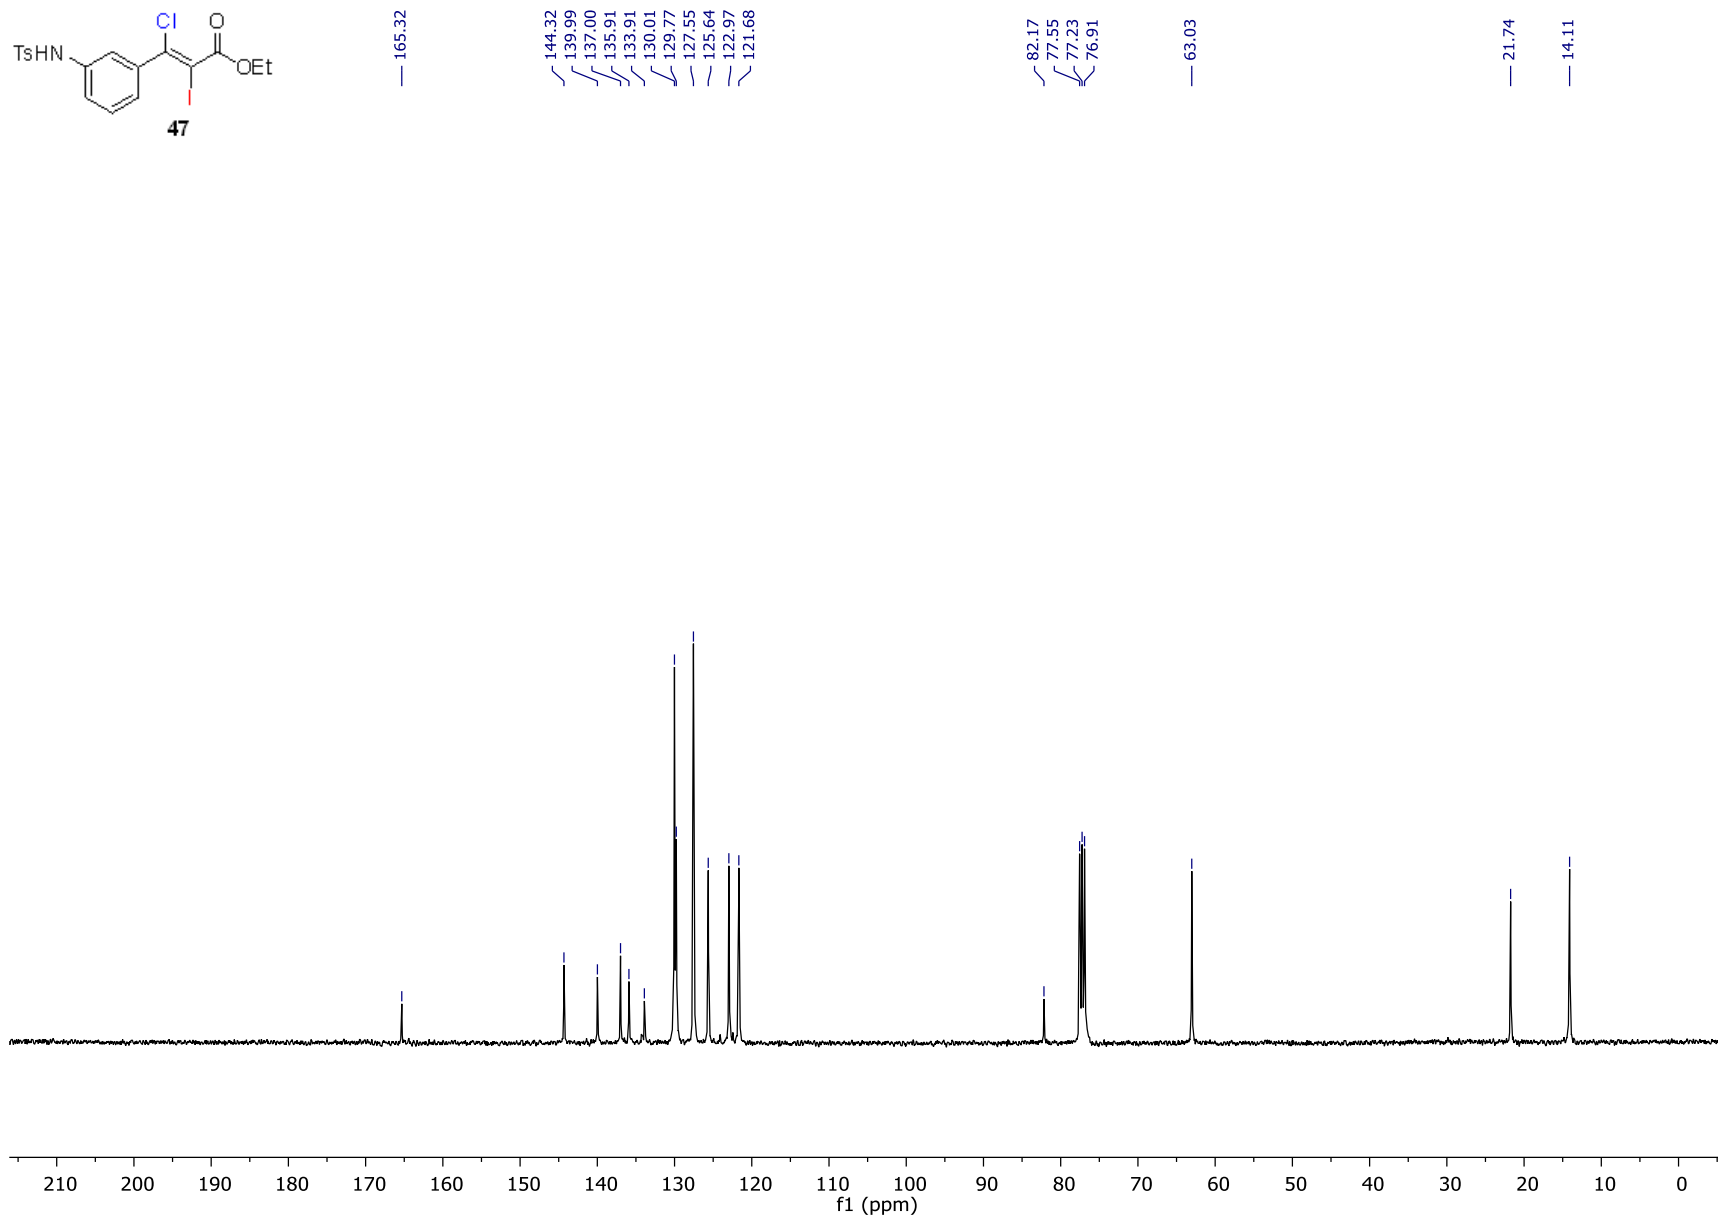

Figure S114. <sup>1</sup>H-NMR of 48

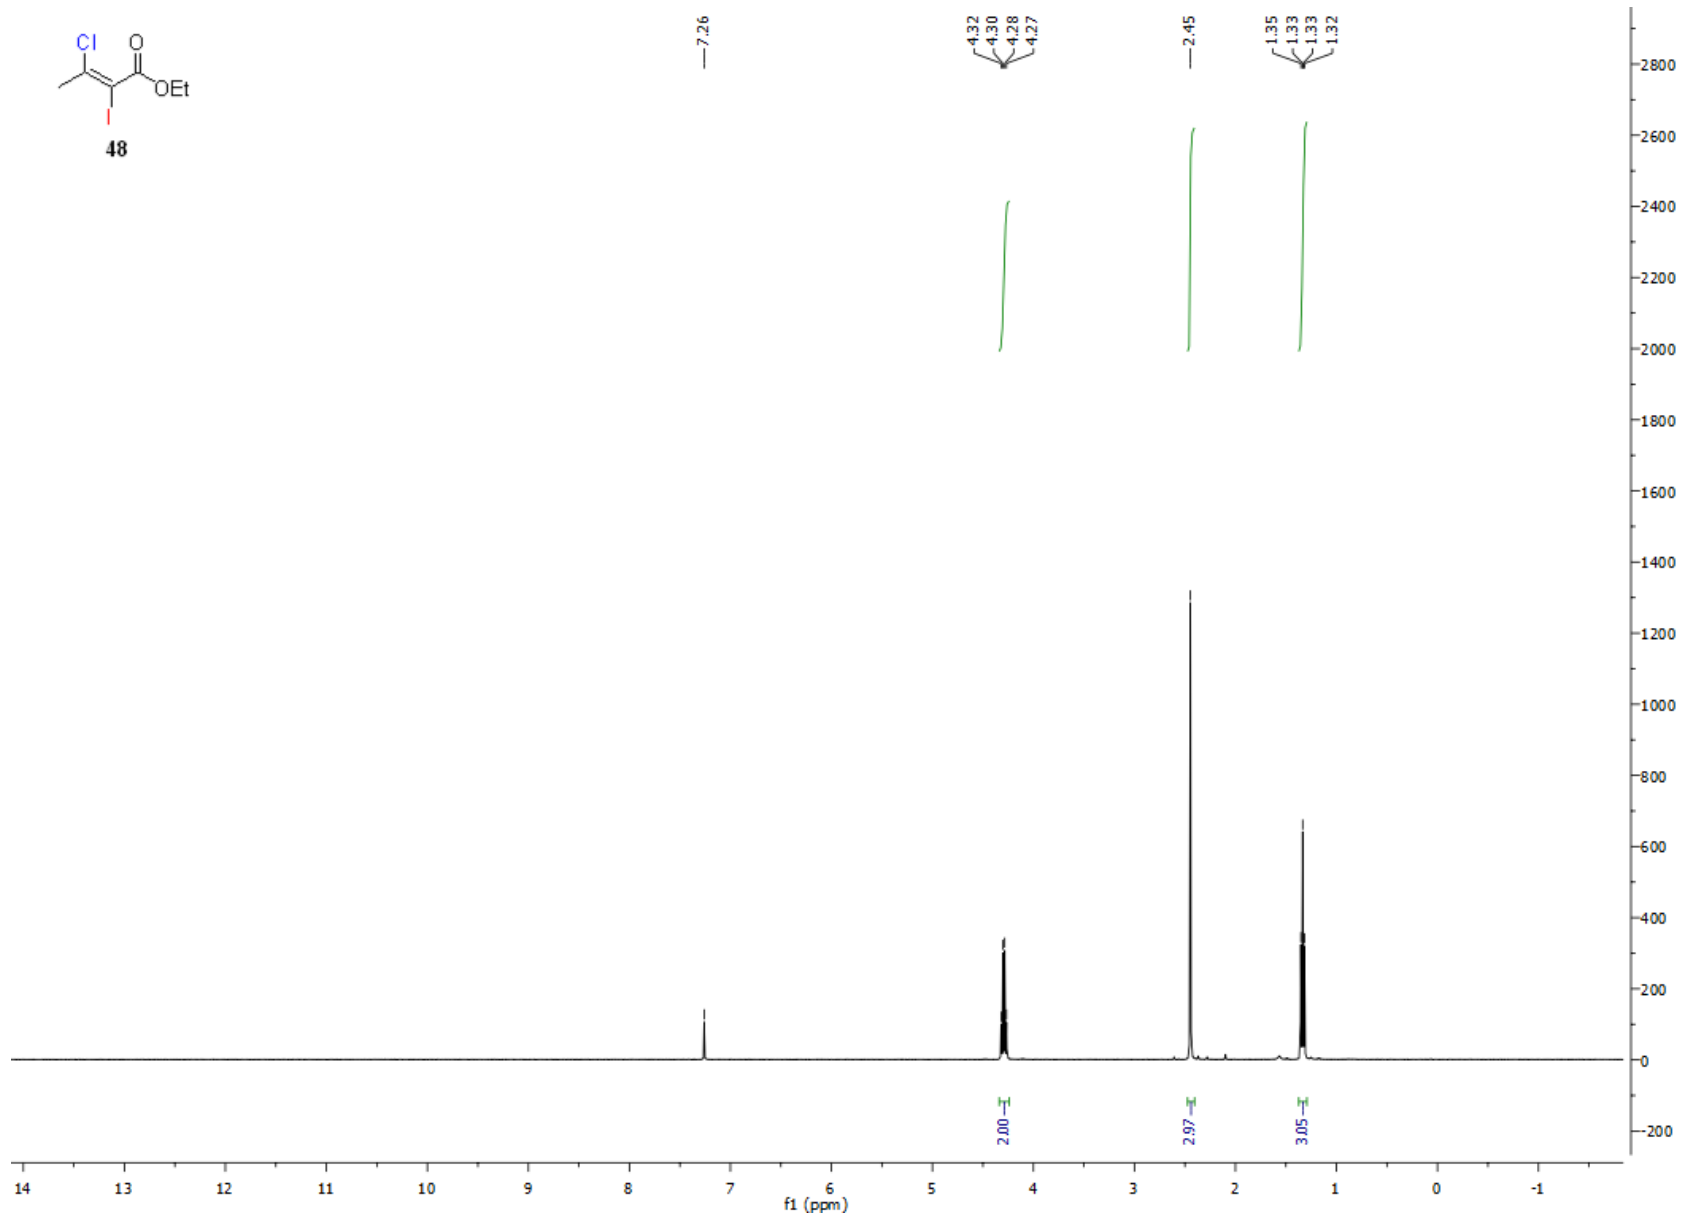



Figure S115.  $^{13}\text{C}$ -NMR of 48

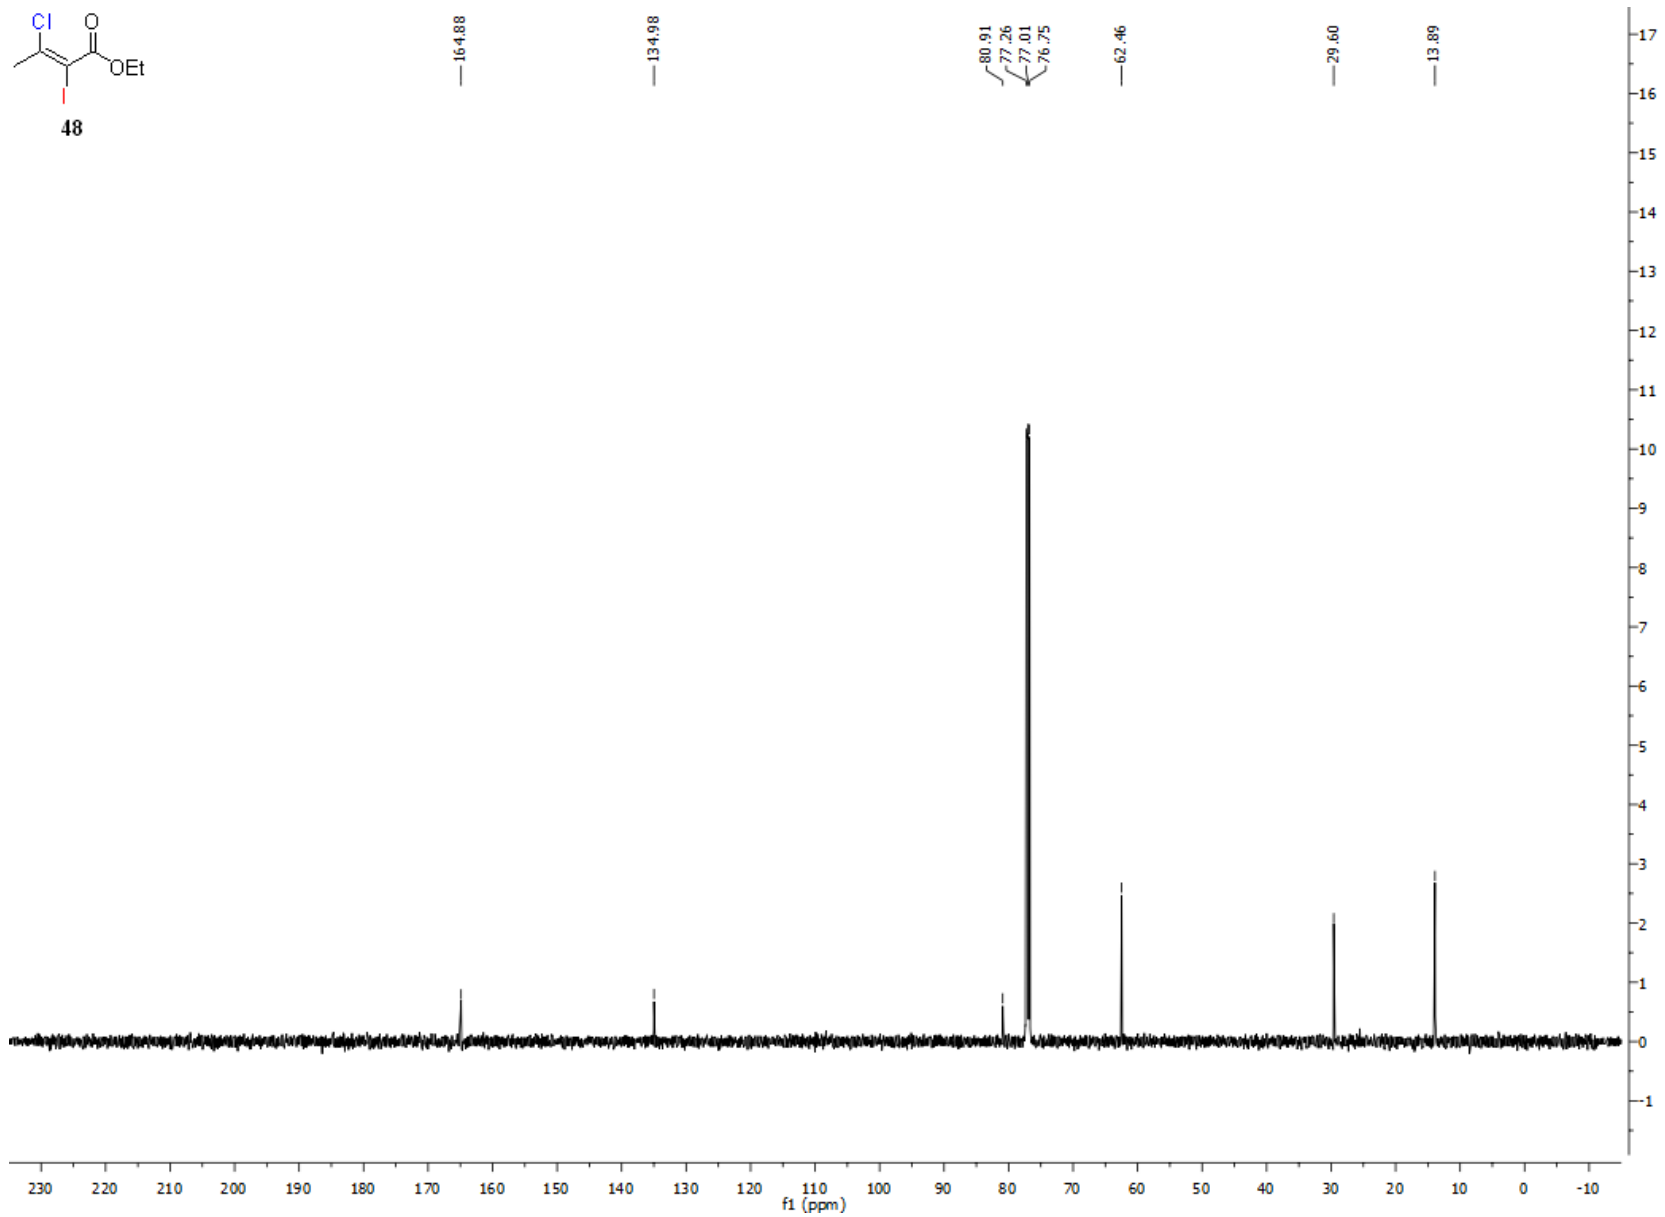

Figure S116. <sup>1</sup>H-NMR of 49

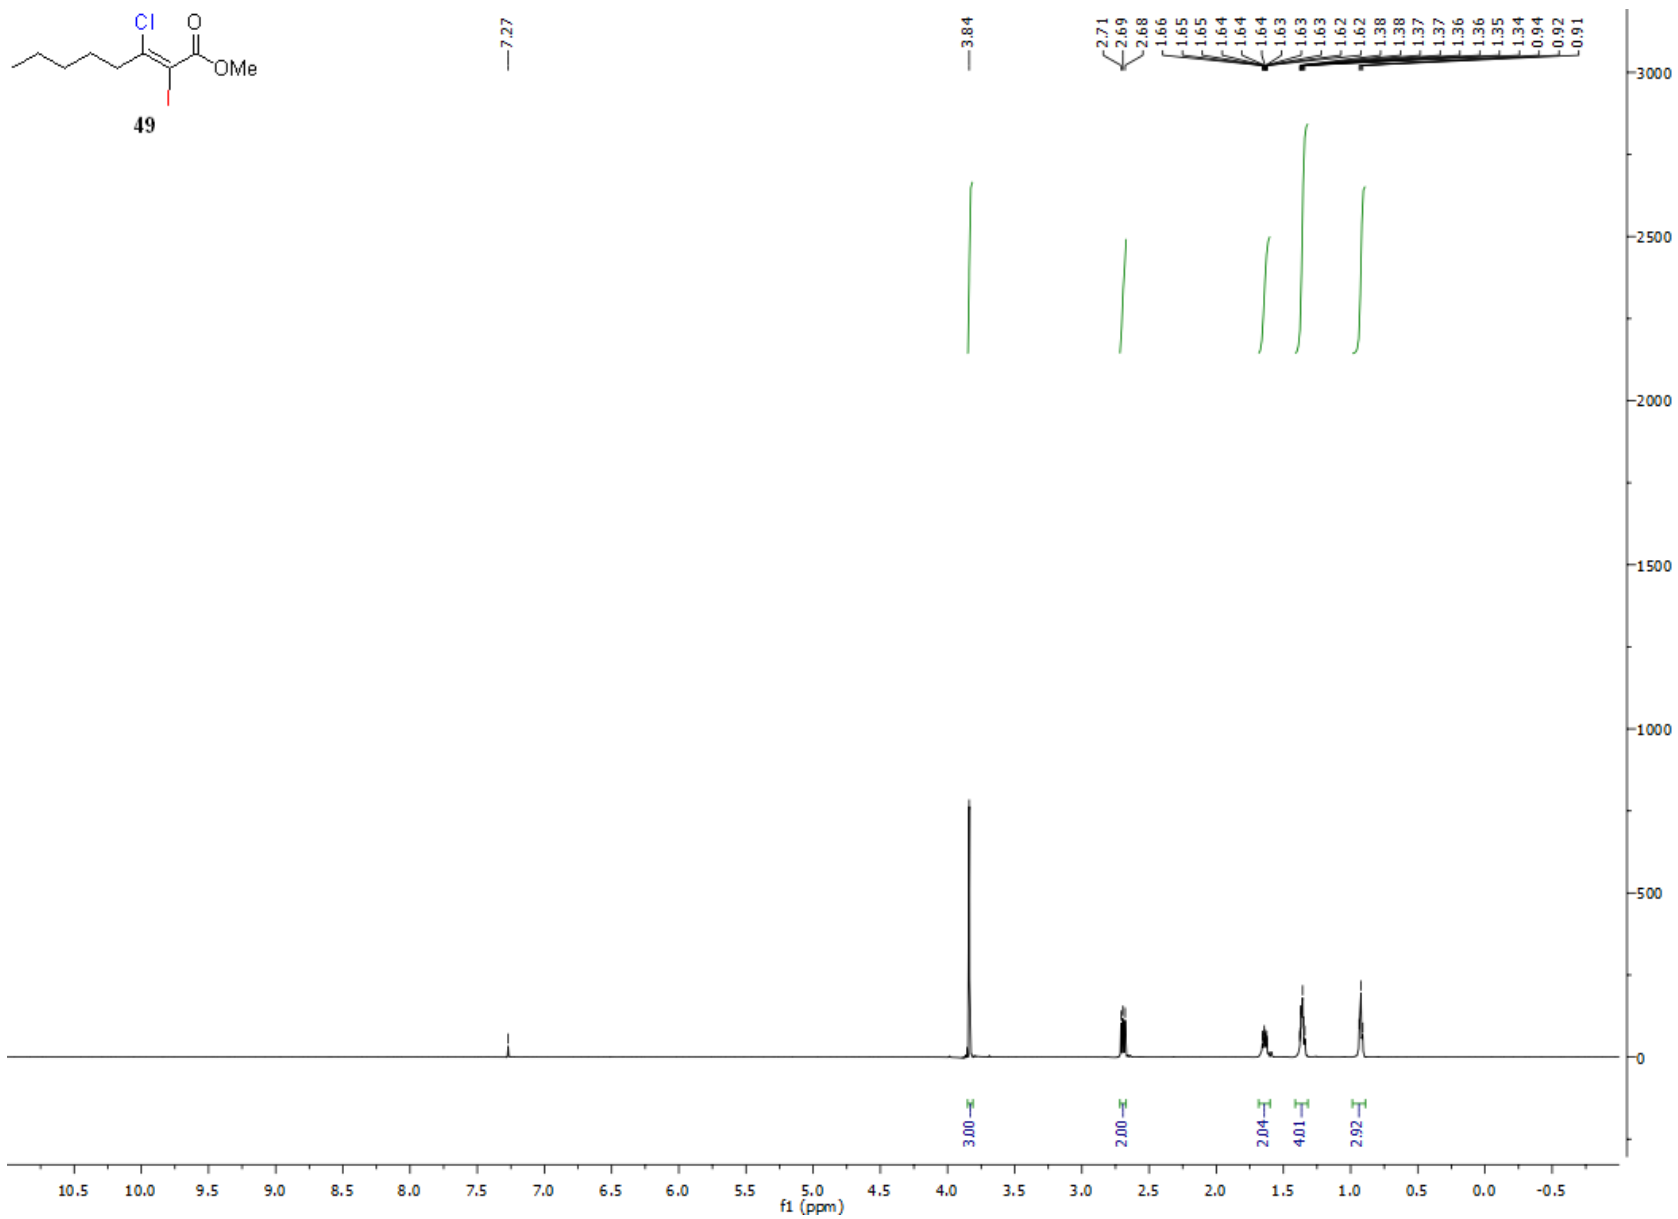

Figure S117.  $^{13}\text{C}$ -NMR of **49**

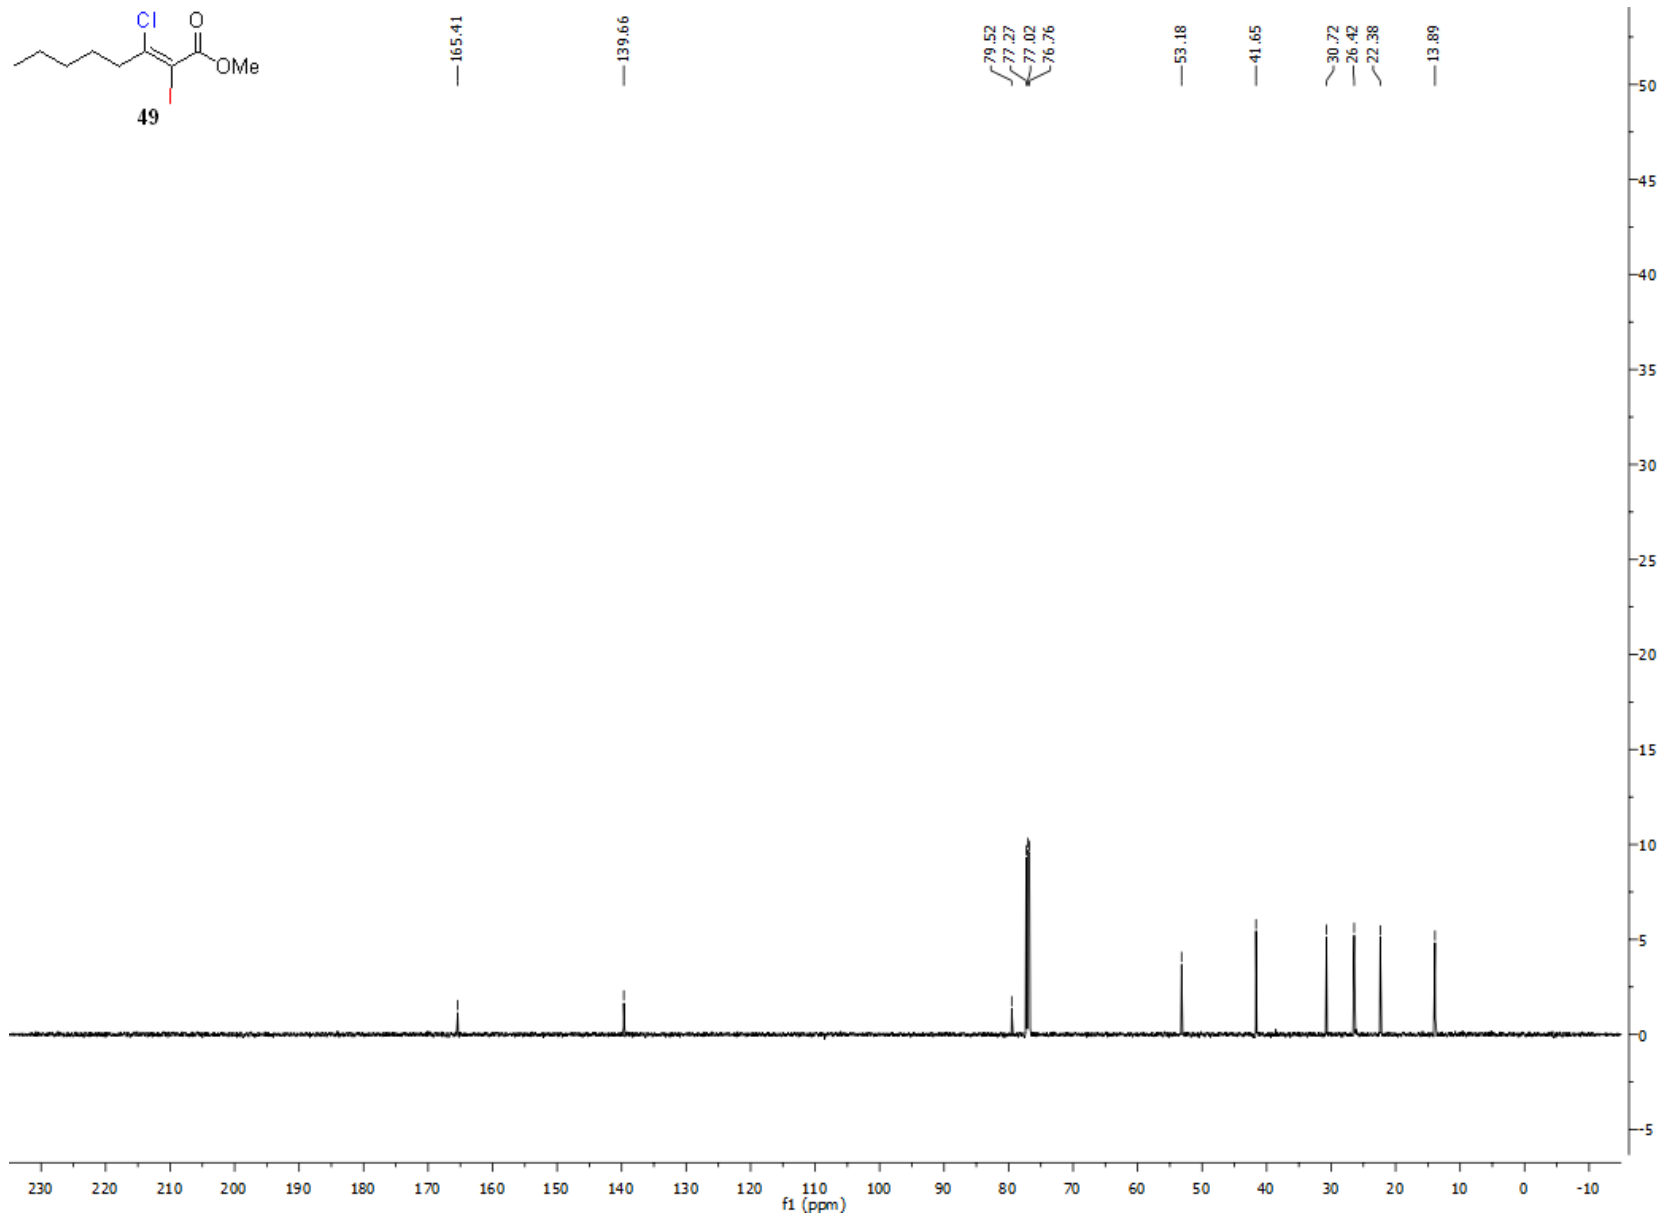

Figure S118. <sup>1</sup>H-NMR of 50

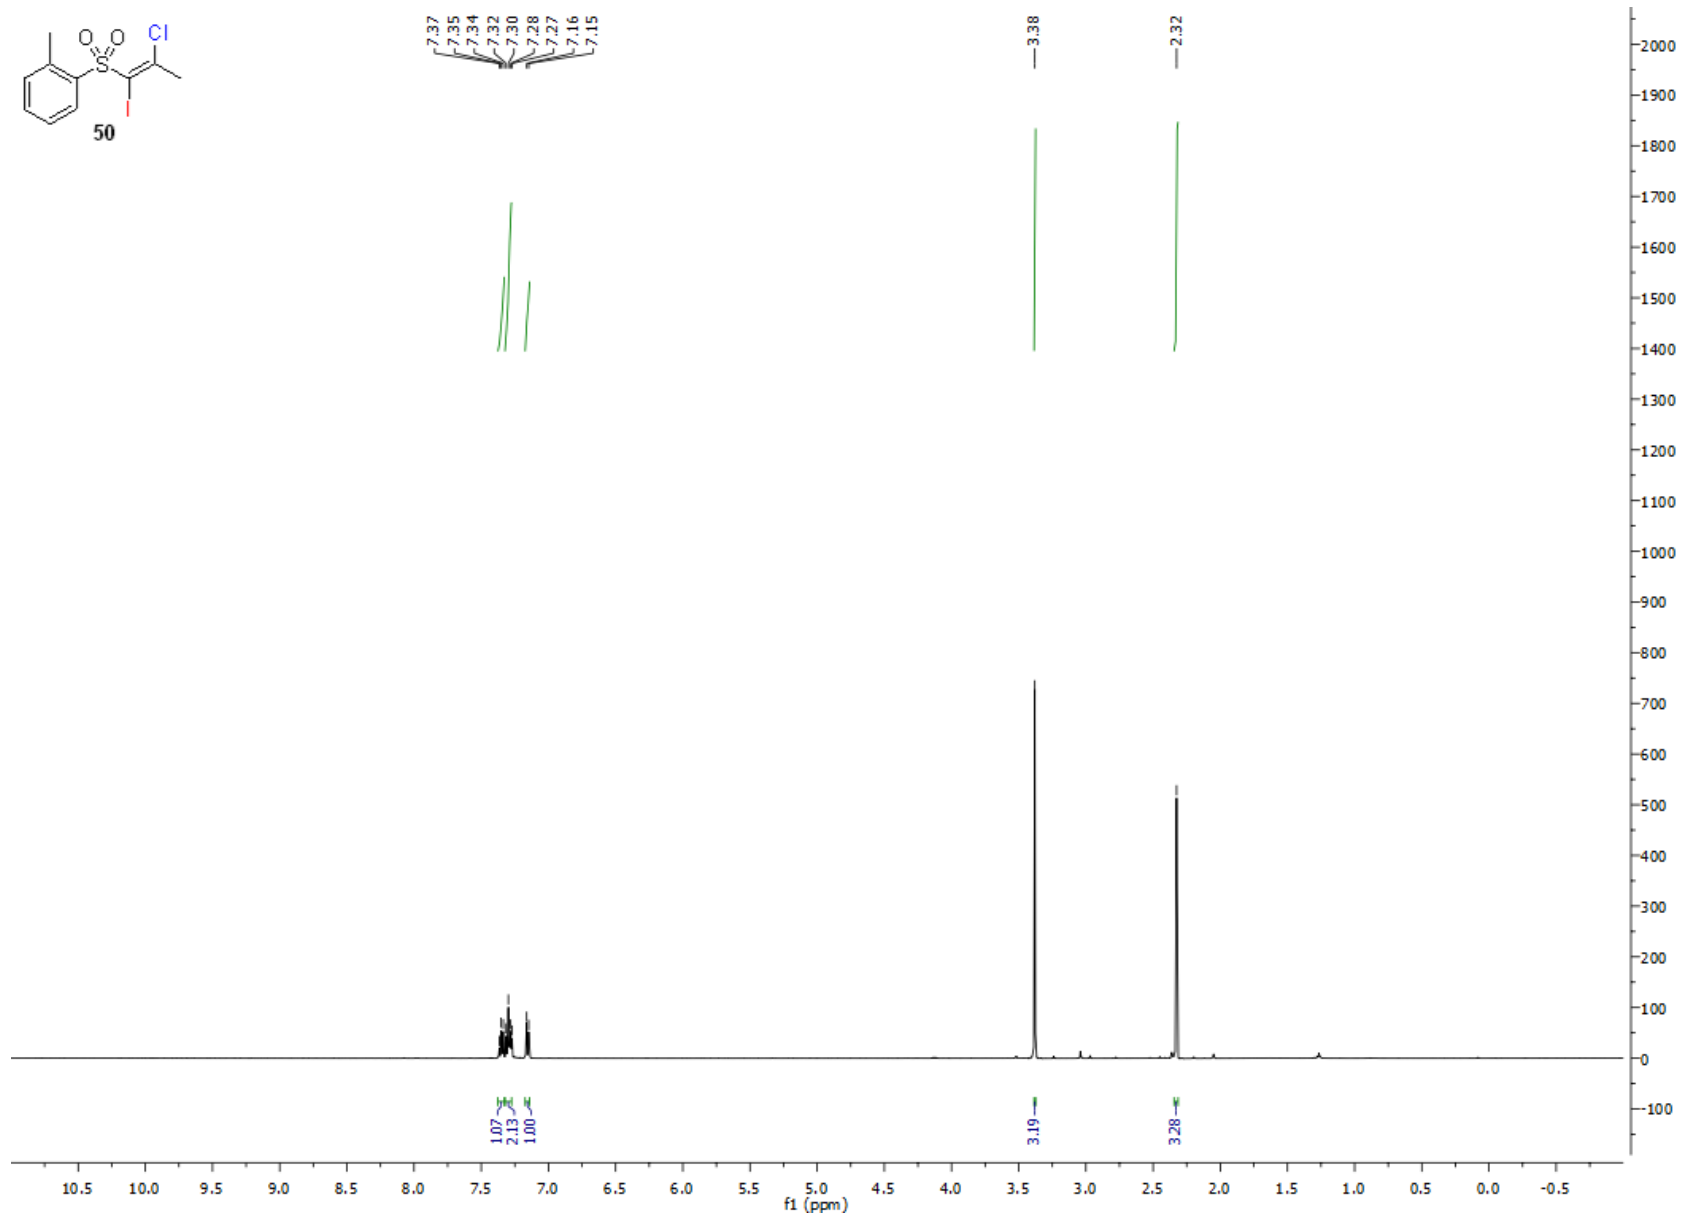

Figure S119.  $^{13}\text{C}$ -NMR of **50**

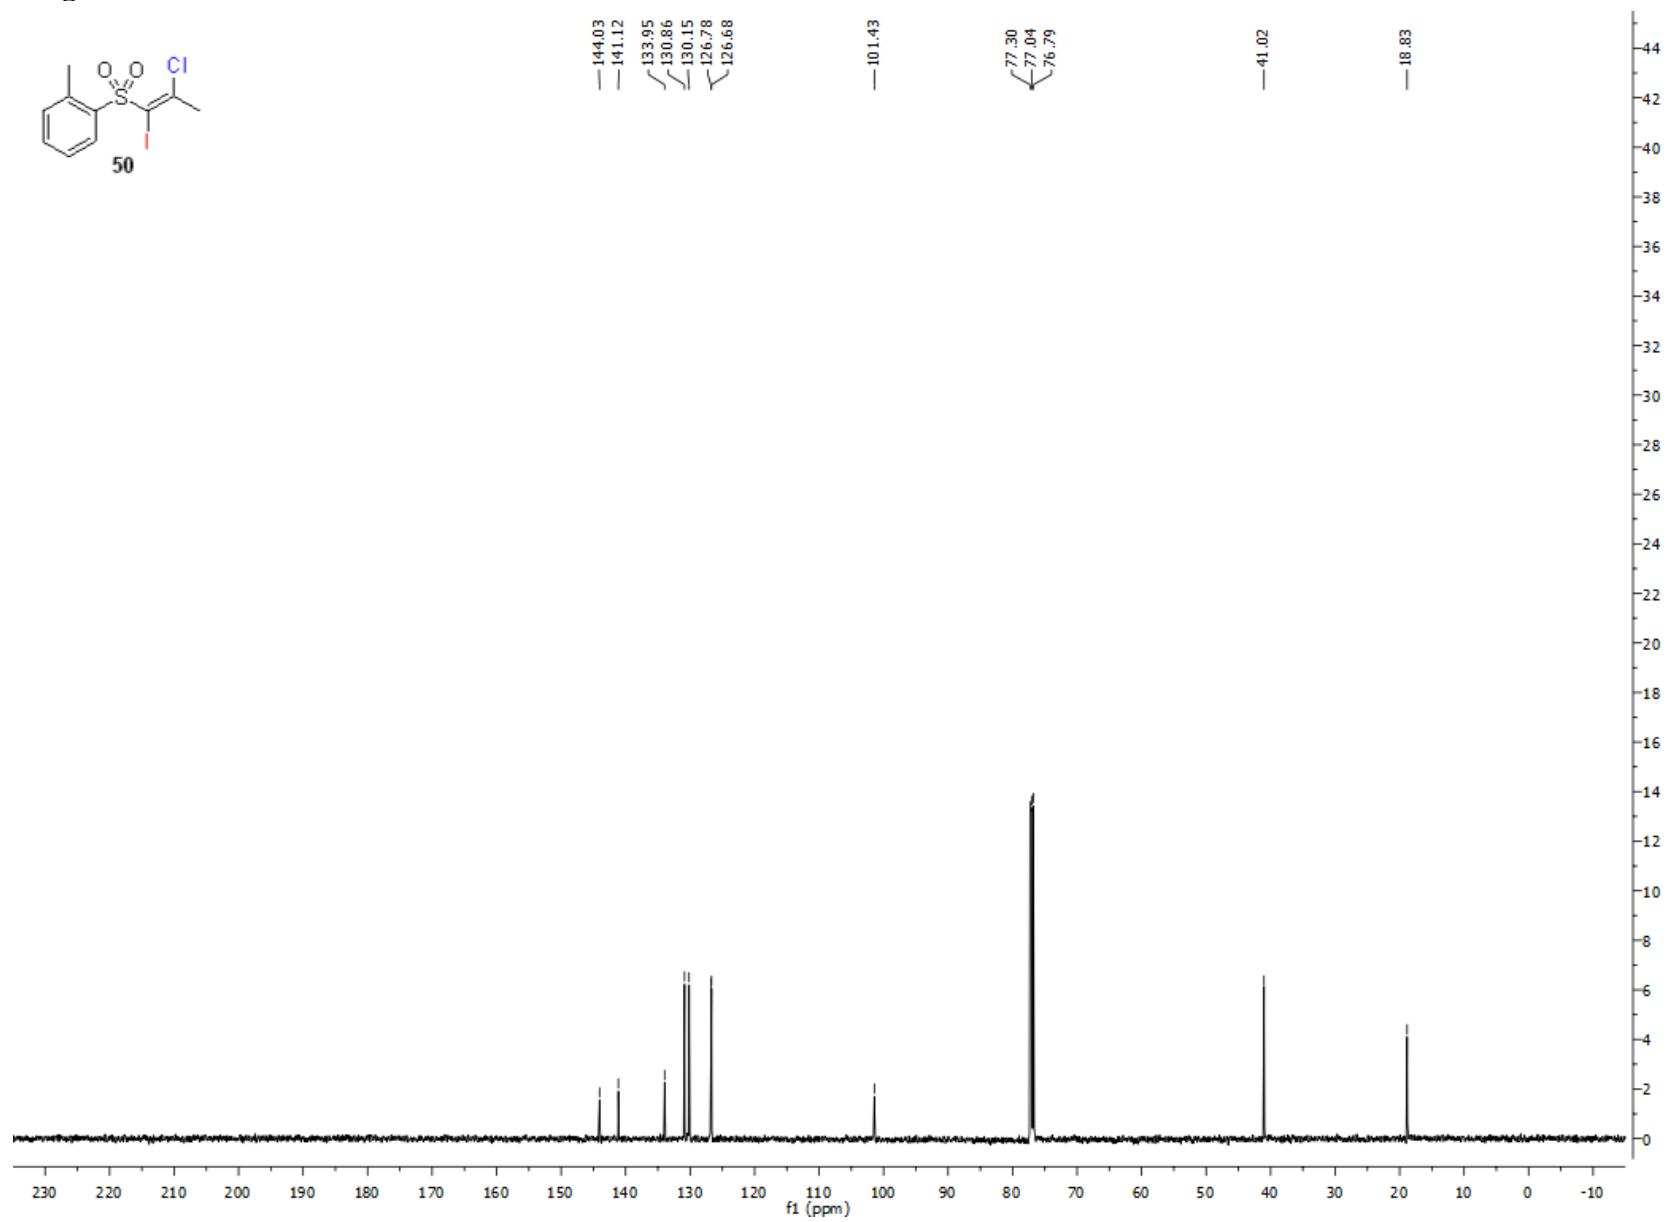

Figure S120. <sup>1</sup>H-NMR of 51

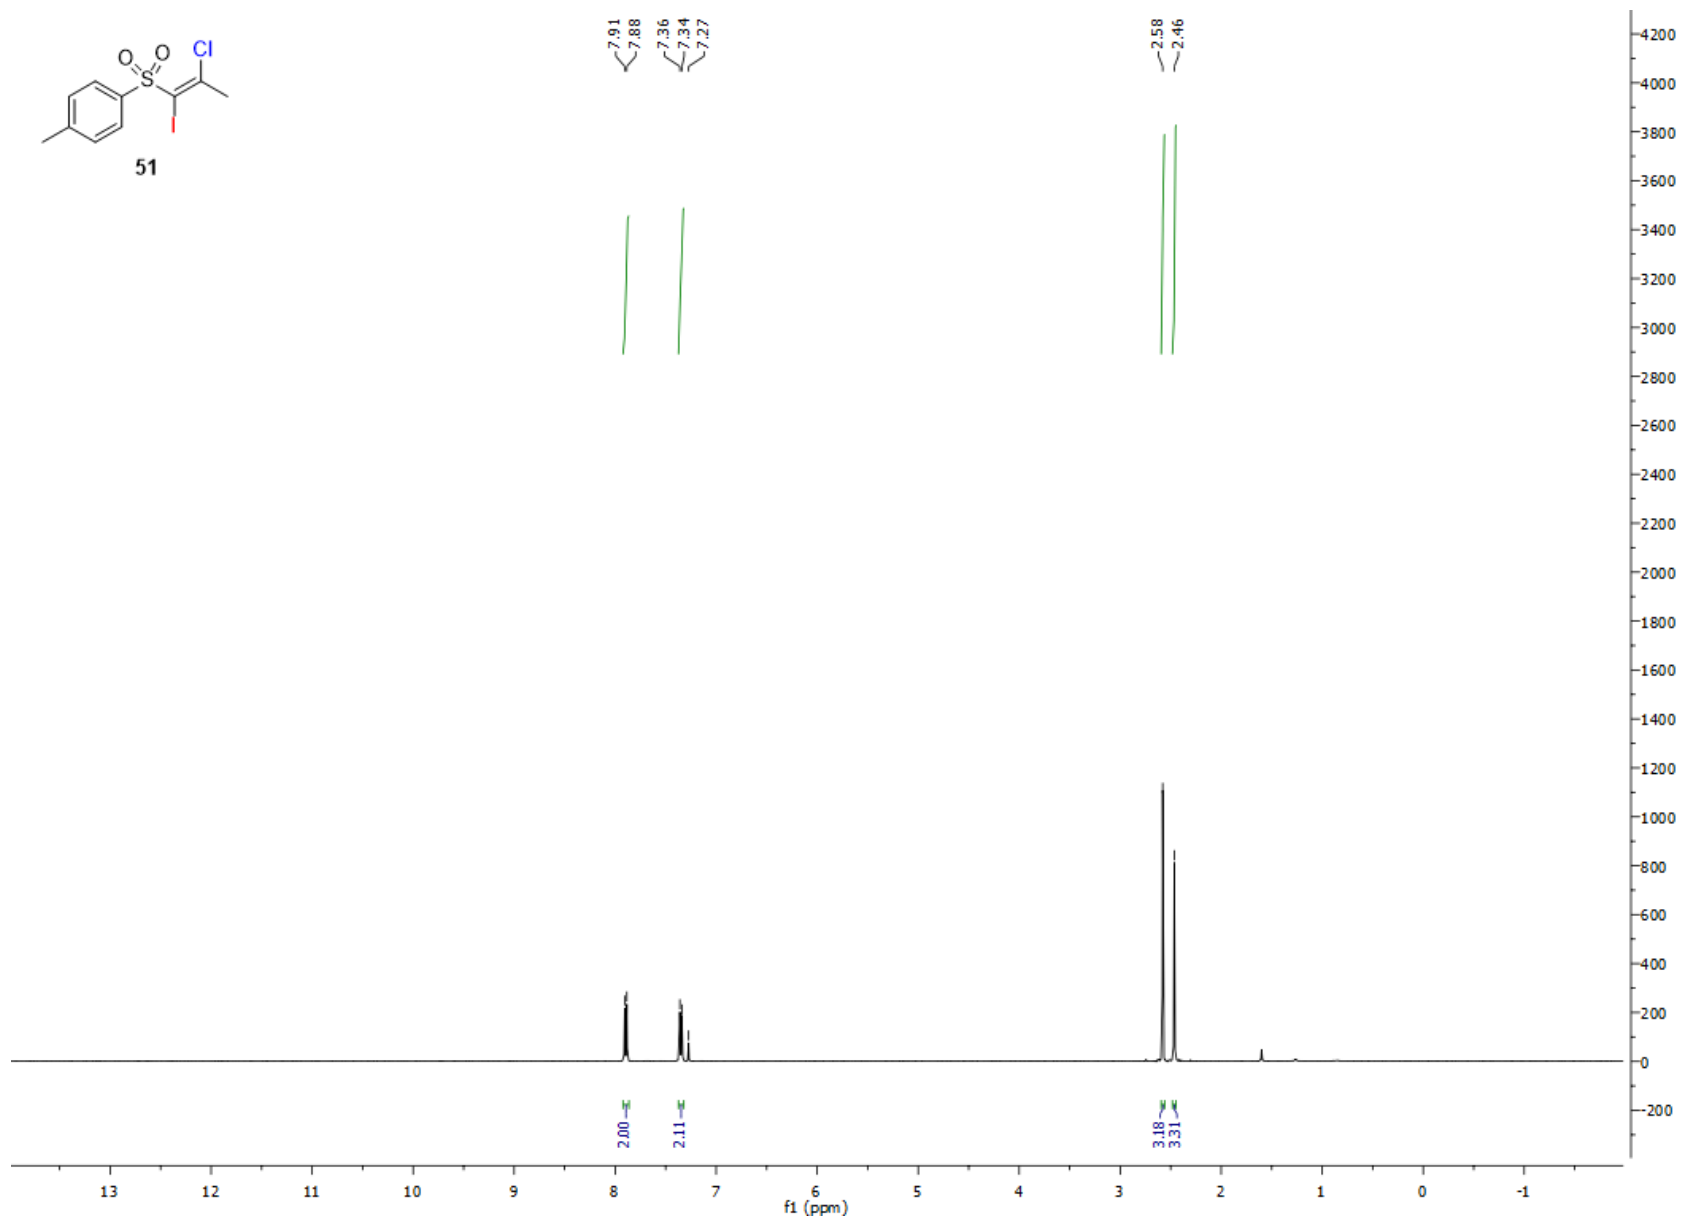

Figure S121.  $^{13}\text{C}$ -NMR of 51

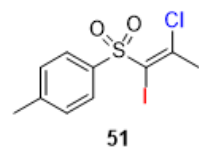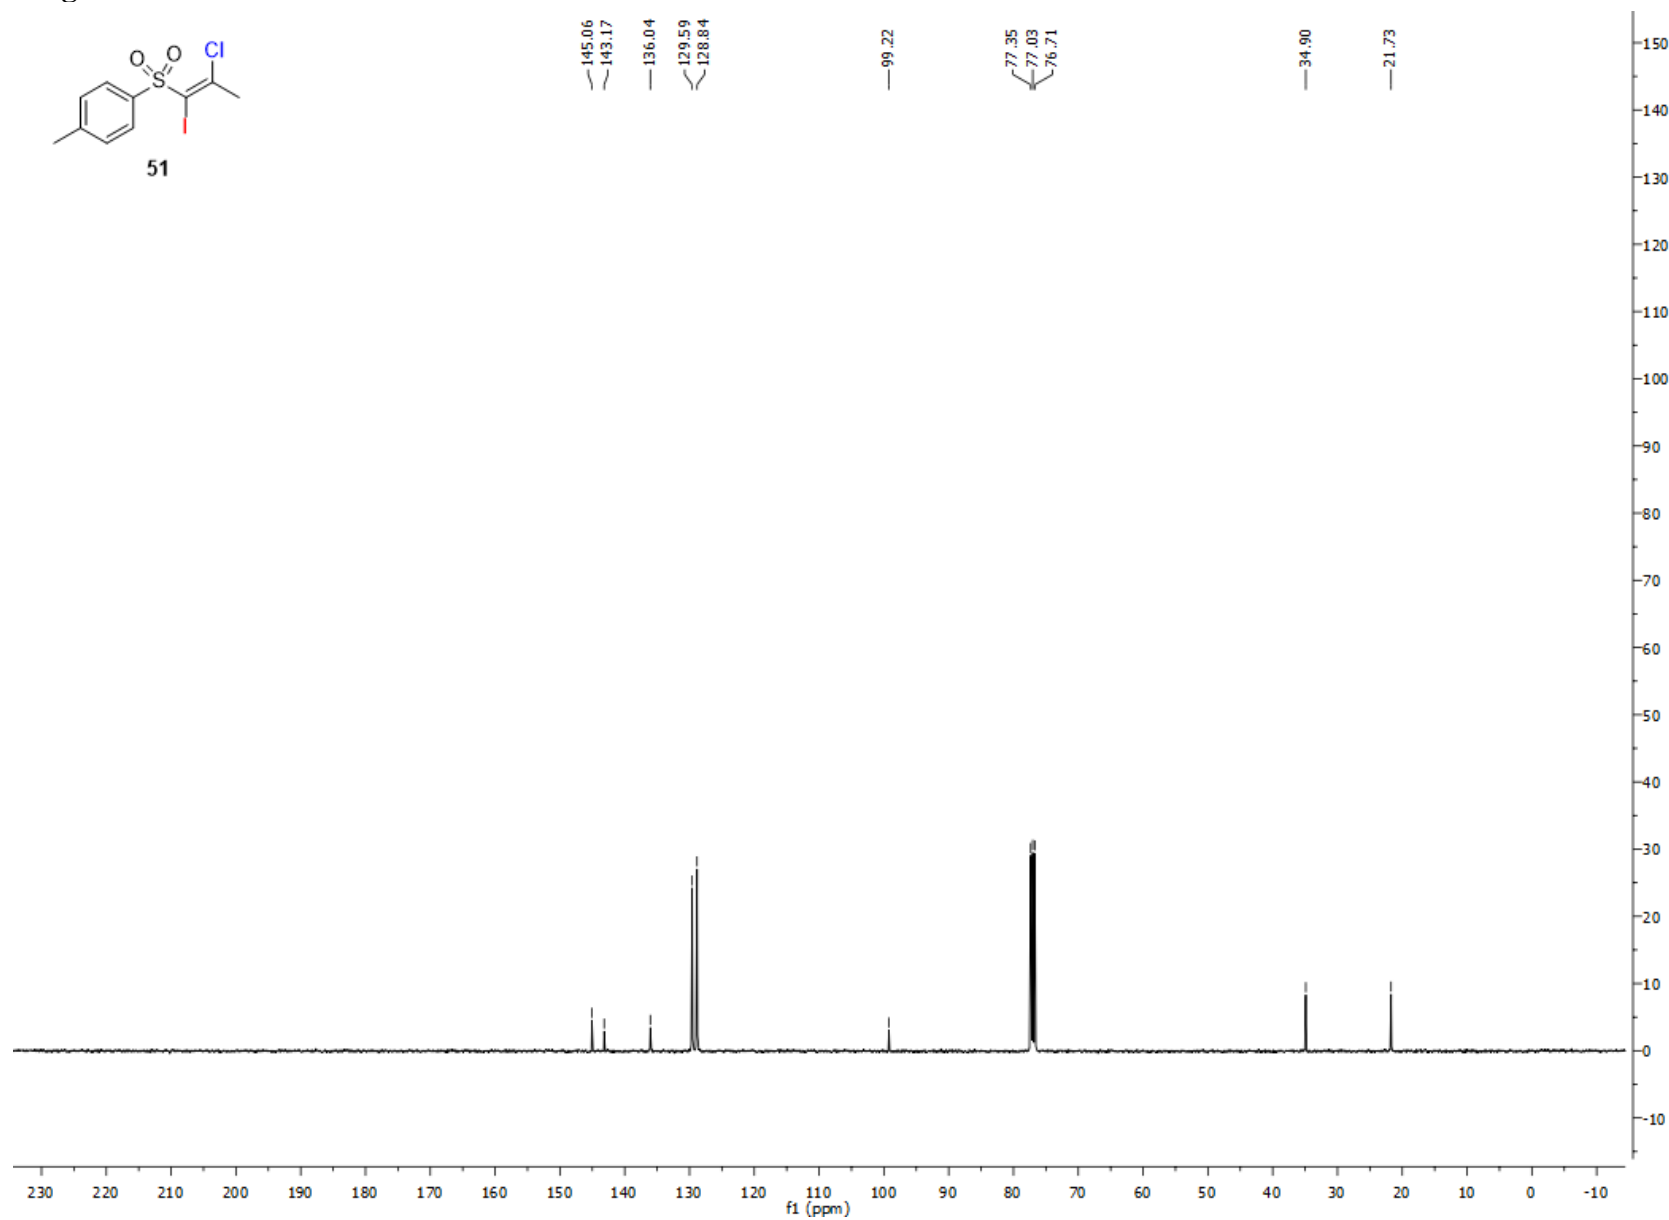

Figure S122. <sup>1</sup>H-NMR of 52

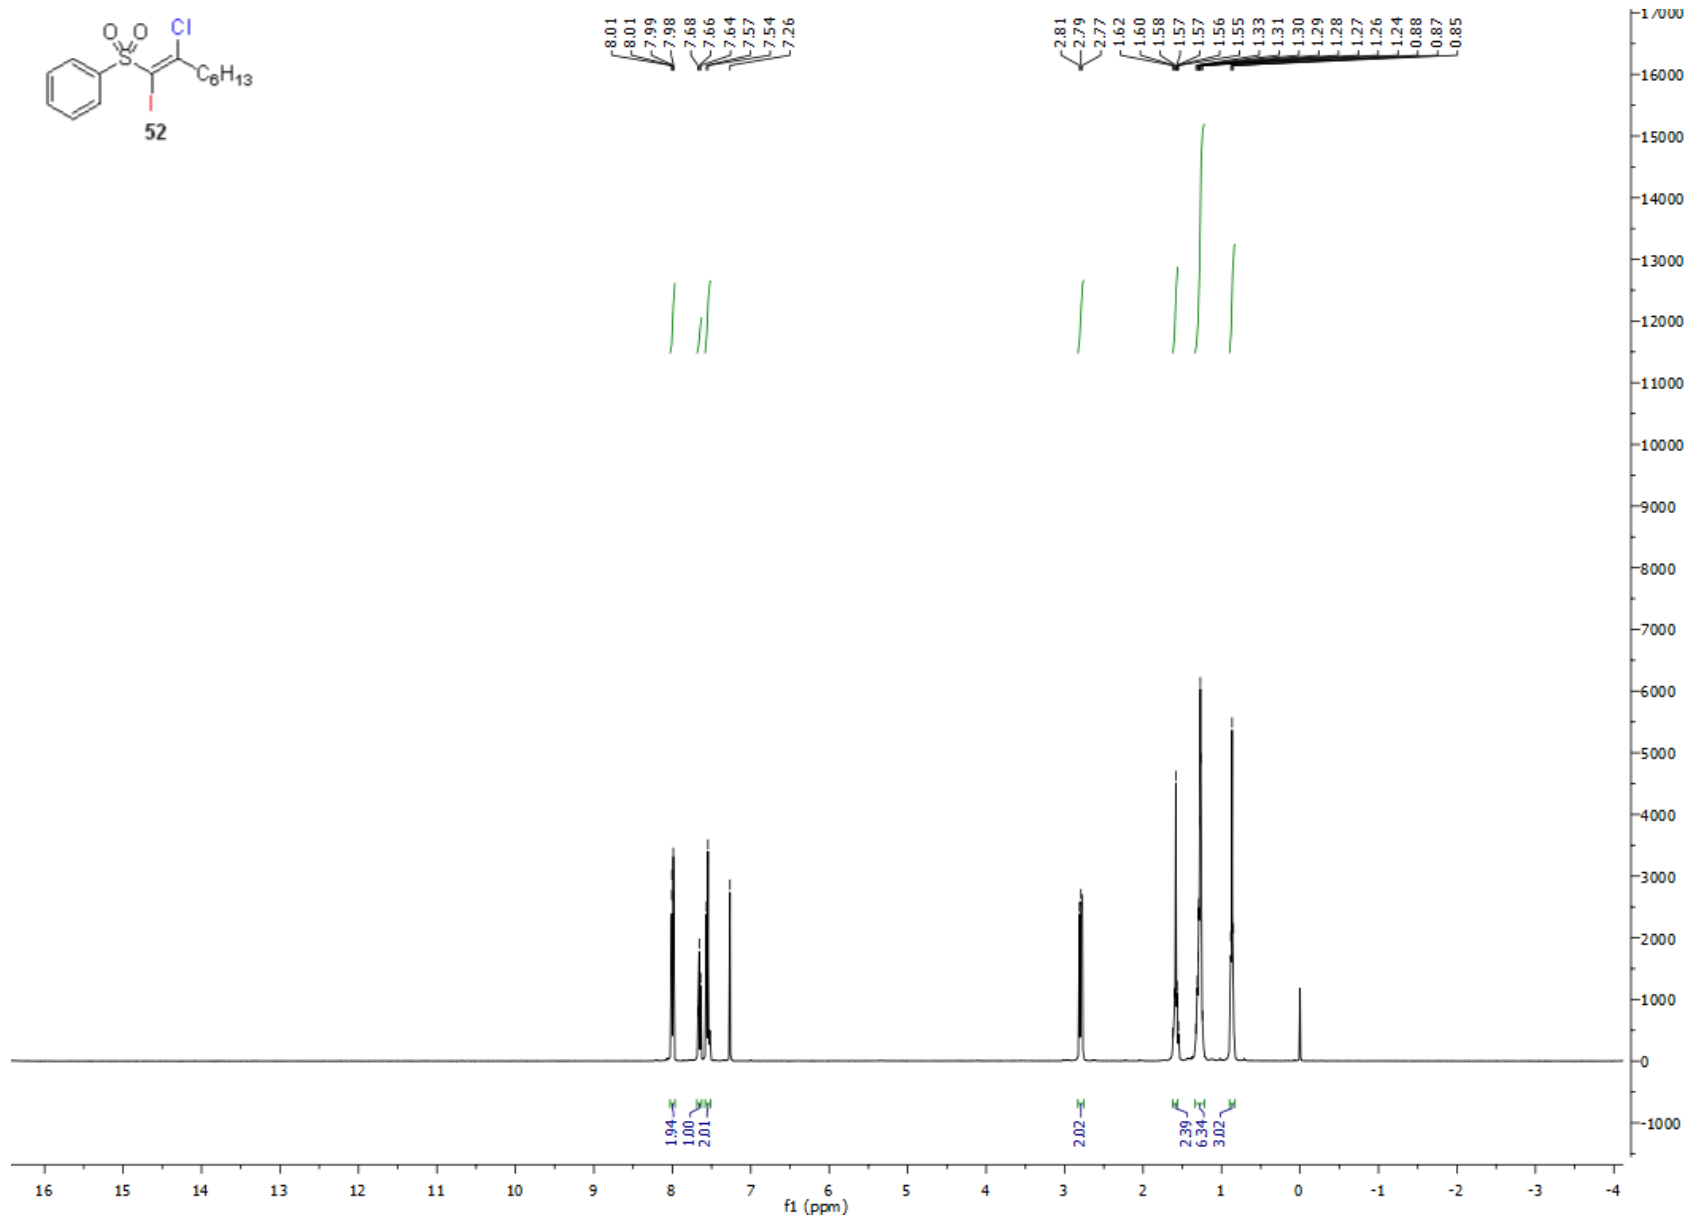



Figure S123.  $^{13}\text{C}$ -NMR of 52

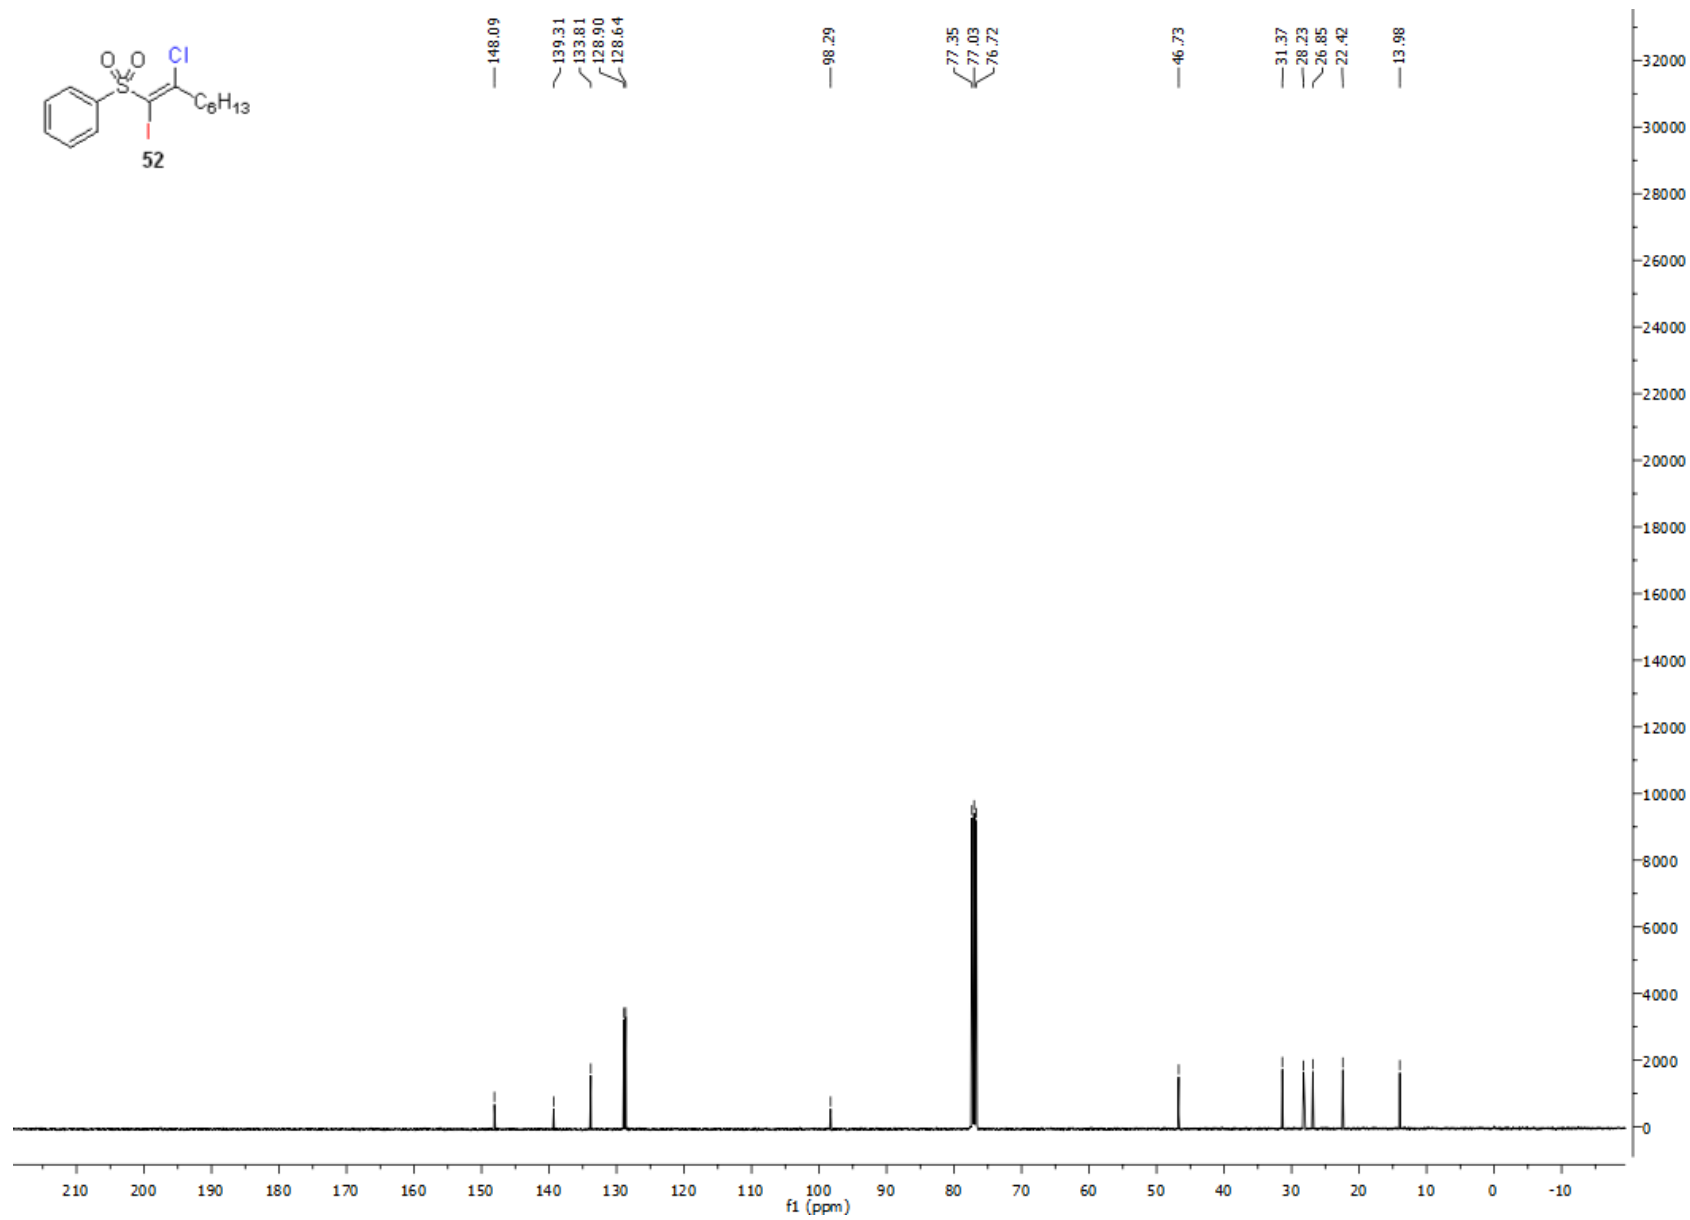

Figure S124. <sup>1</sup>H-NMR of 53

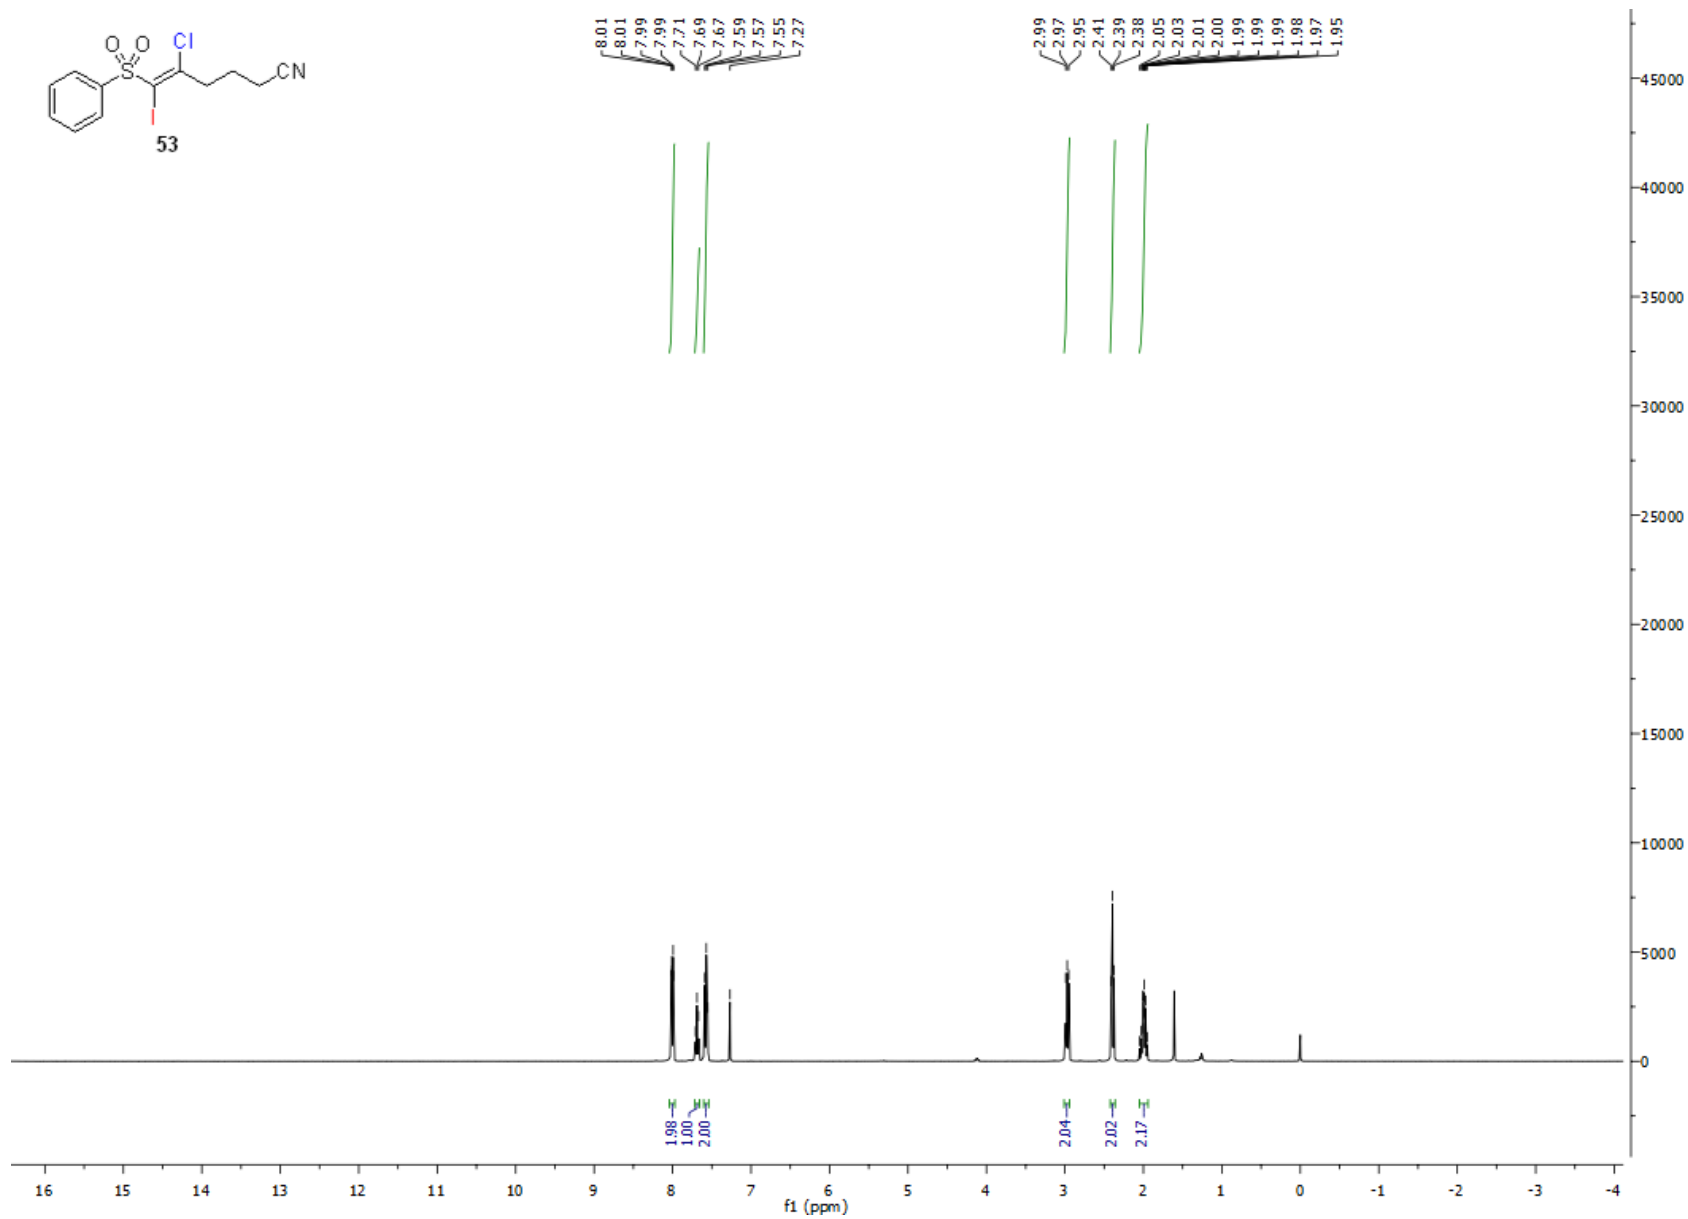

Figure S125. <sup>13</sup>C-NMR of 53

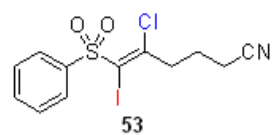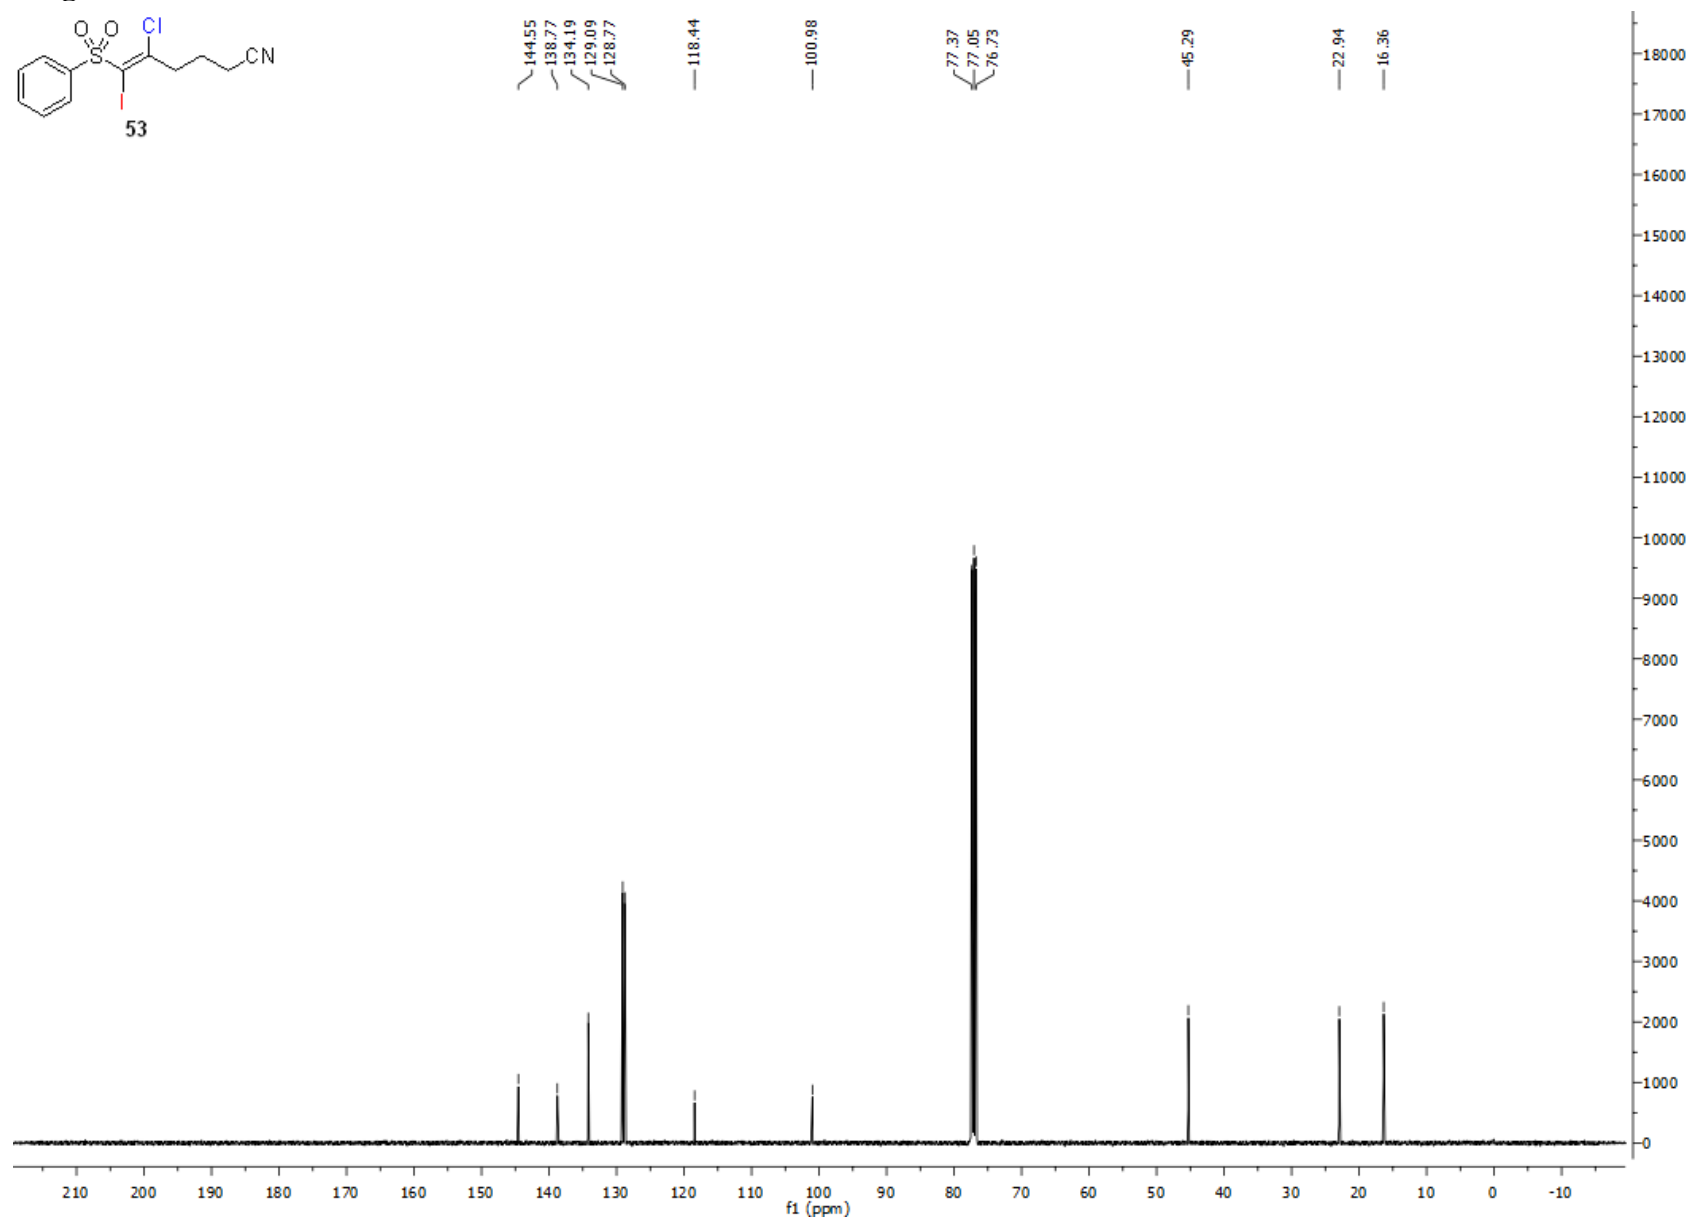

Figure S126. <sup>1</sup>H-NMR of 54

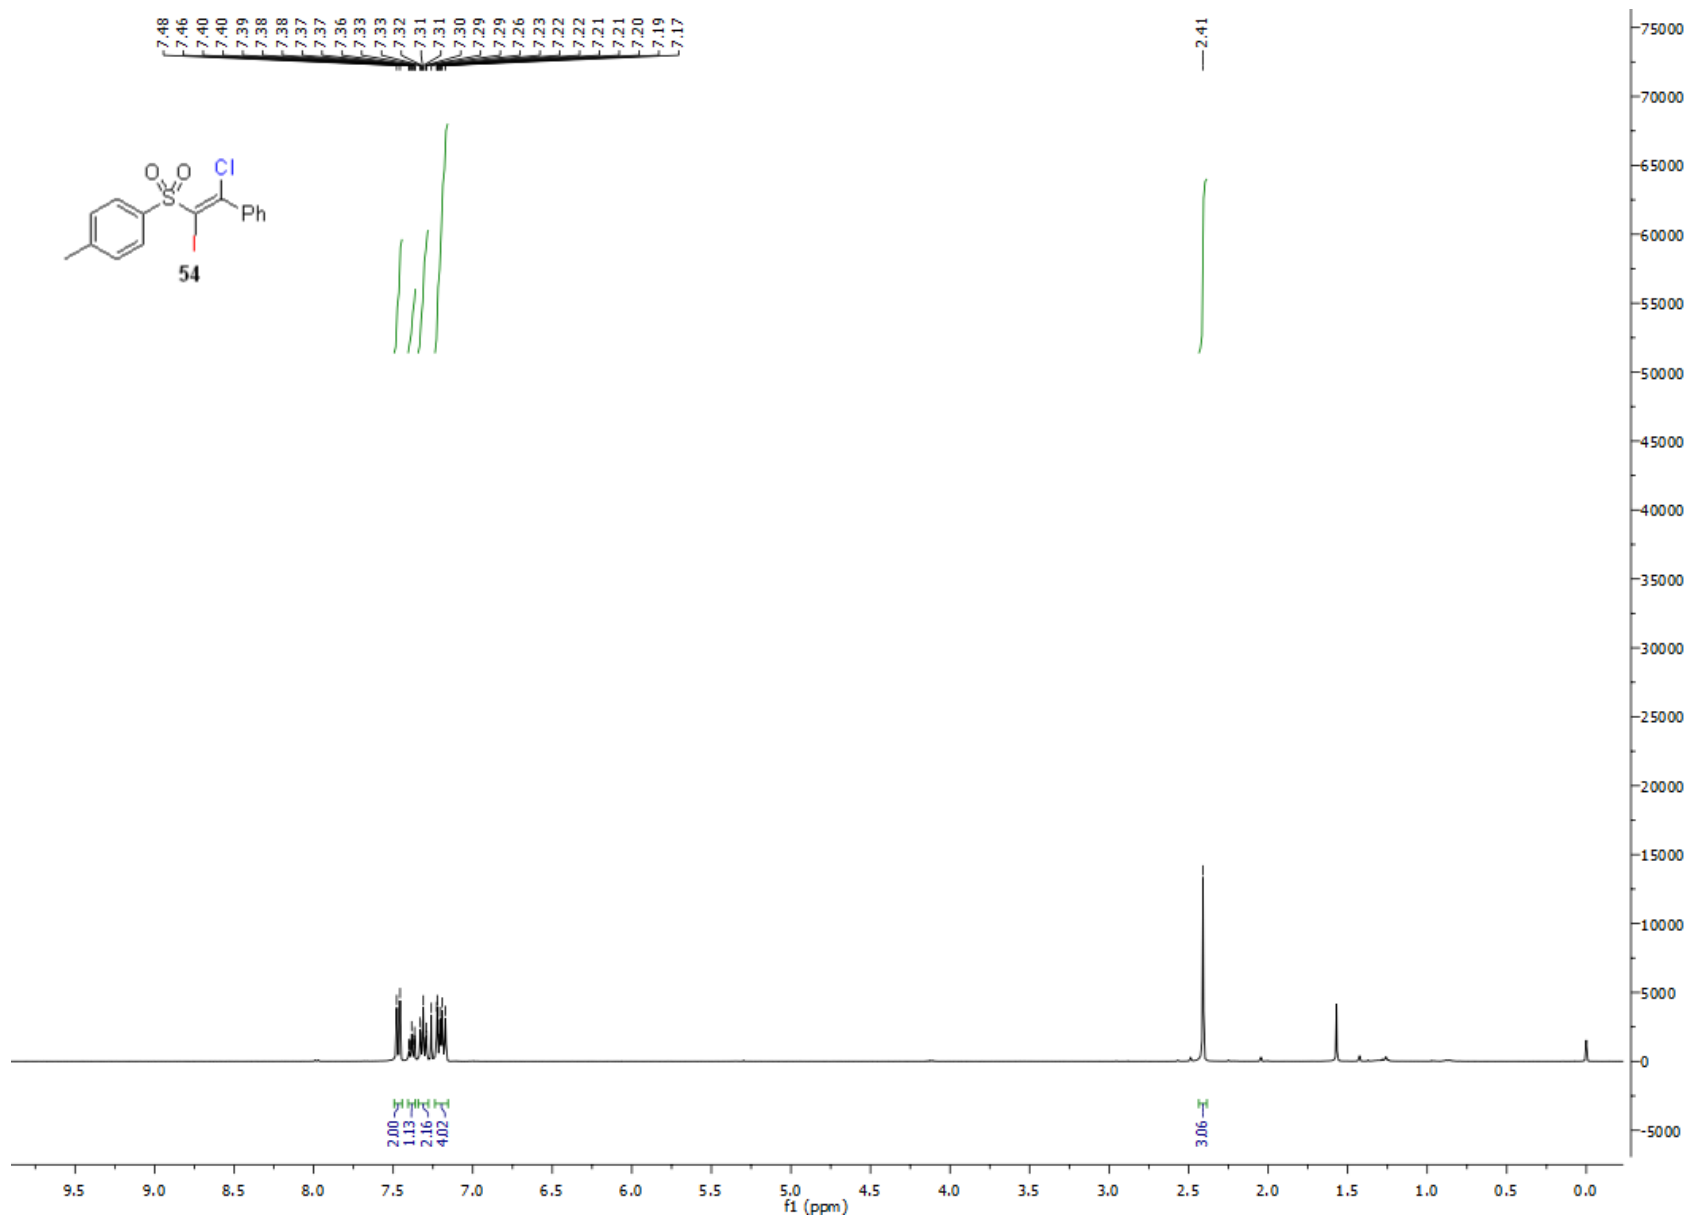

Figure S127.  $^{13}\text{C}$ -NMR of 54

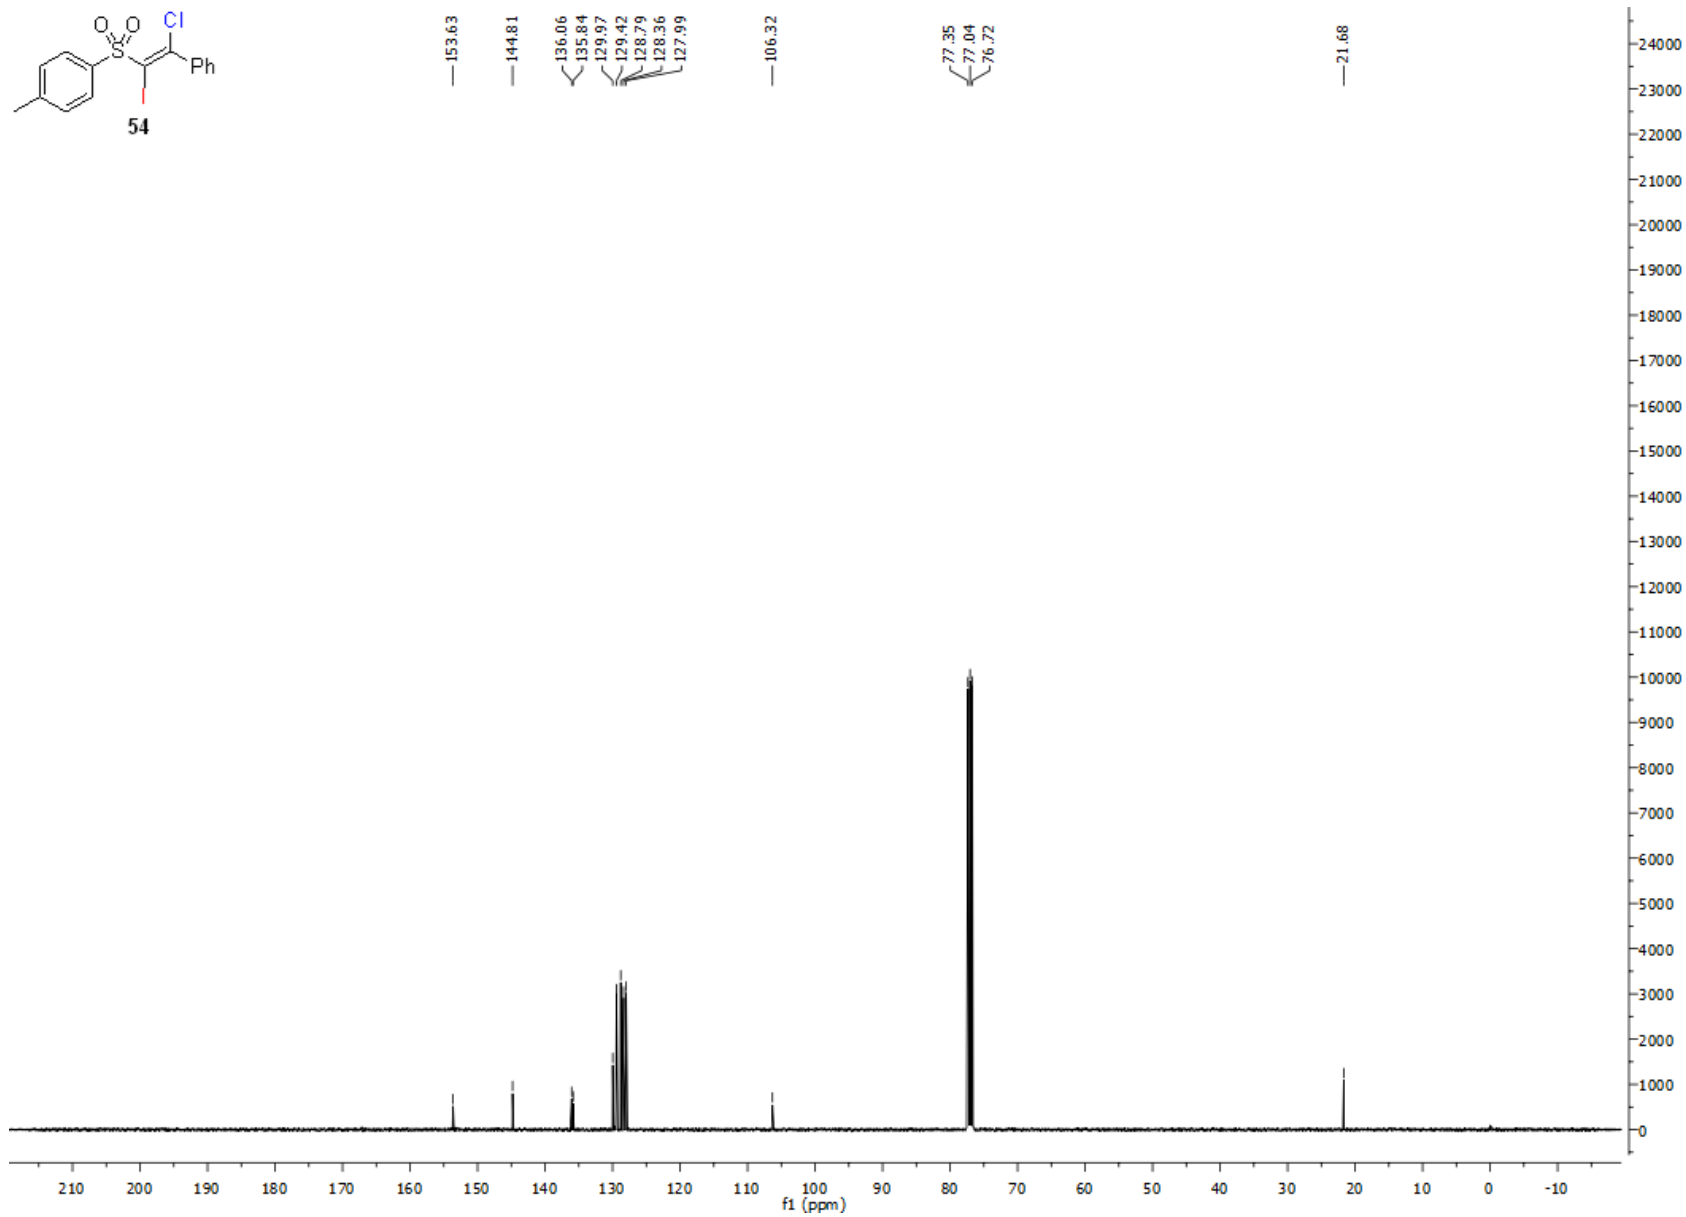

Figure S128. <sup>1</sup>H-NMR of 55

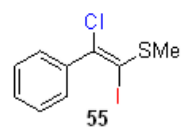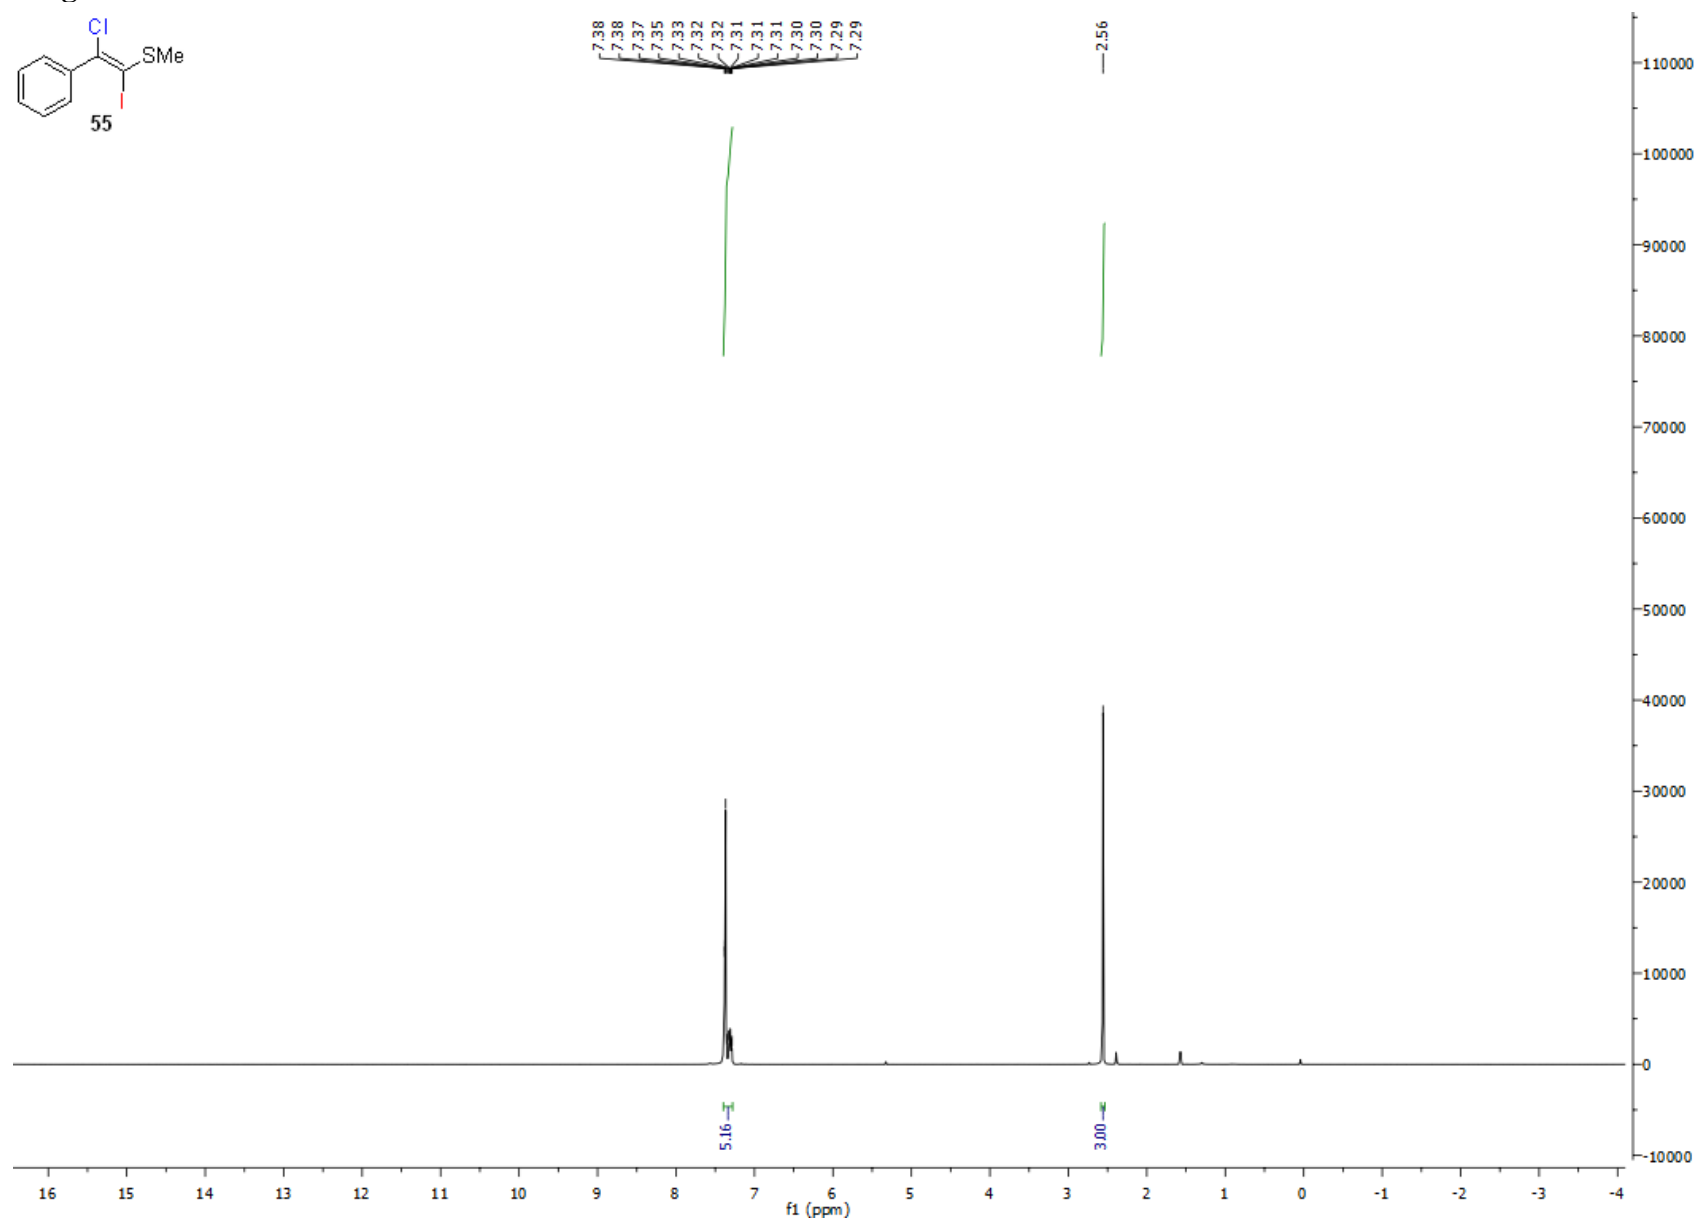

Figure S129.  $^{13}\text{C}$ -NMR of 55

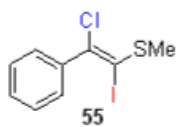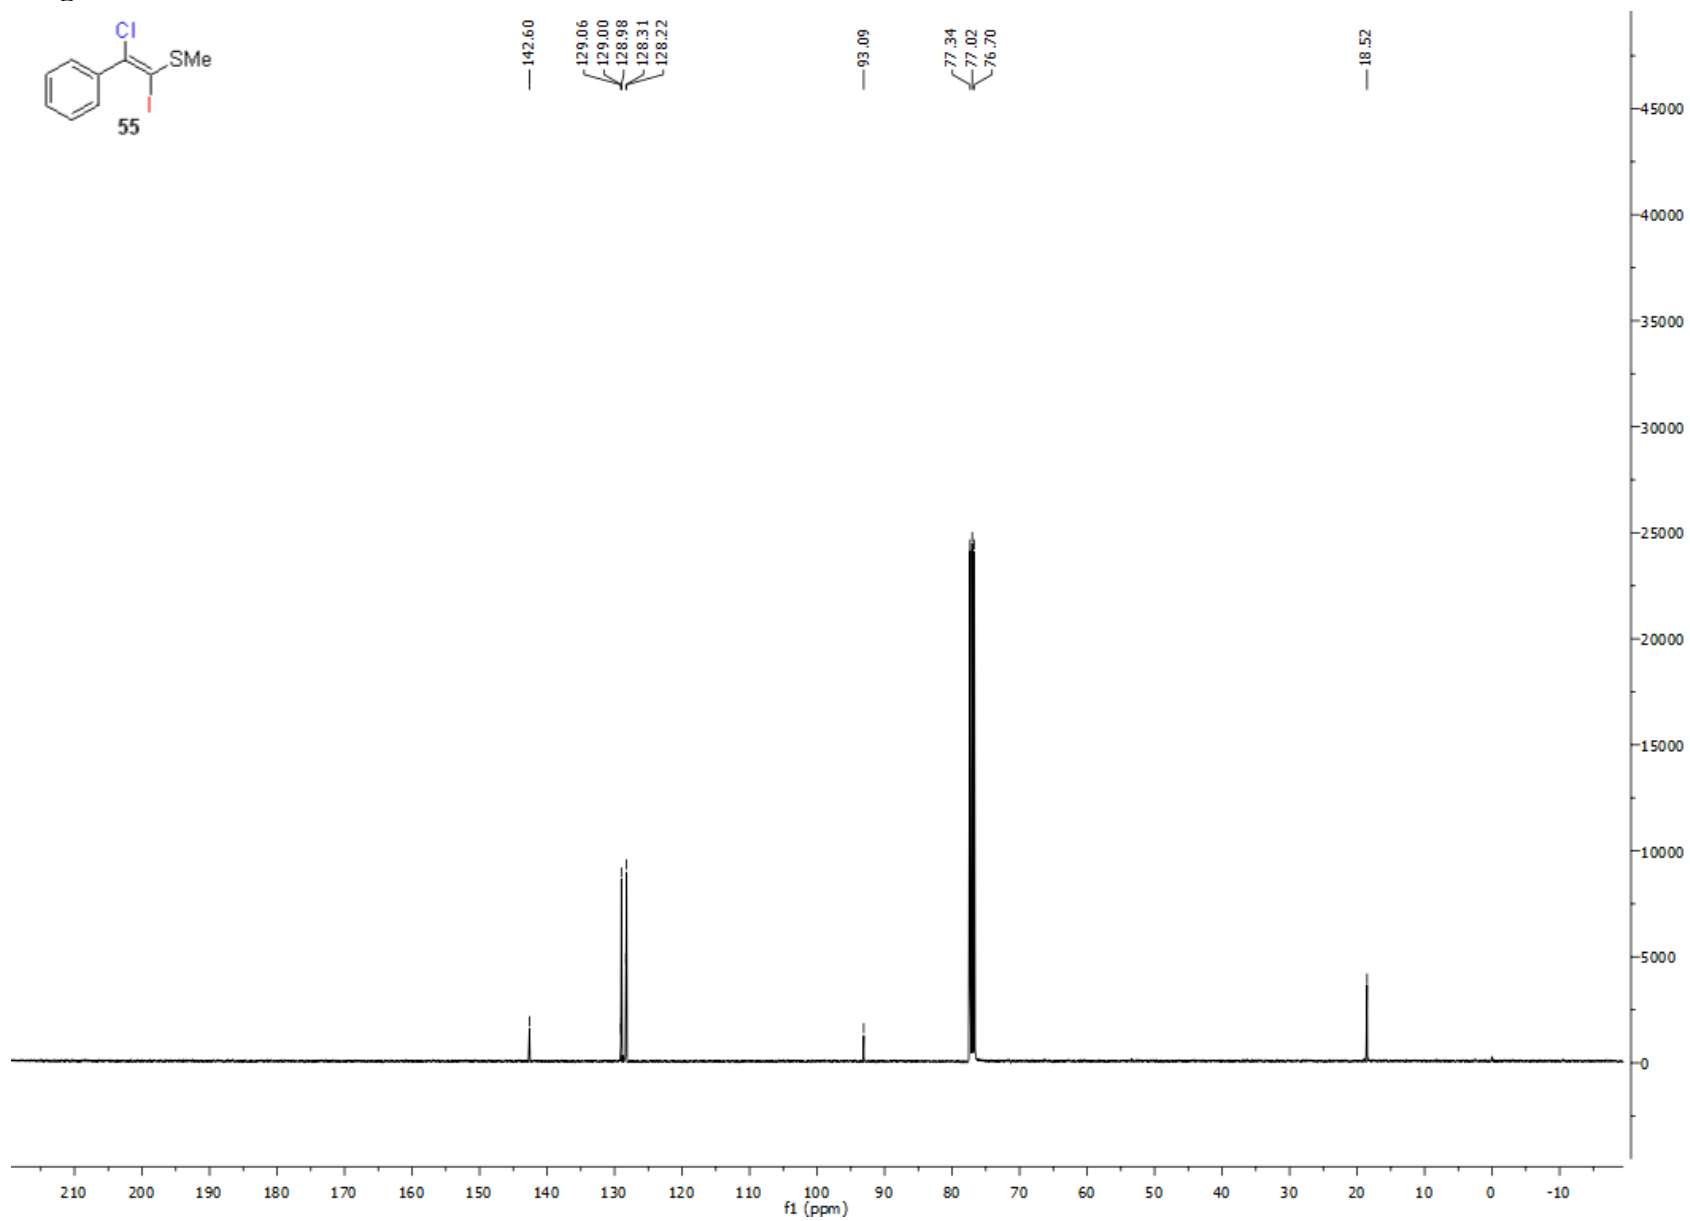

Figure S130. <sup>1</sup>H-NMR of 56

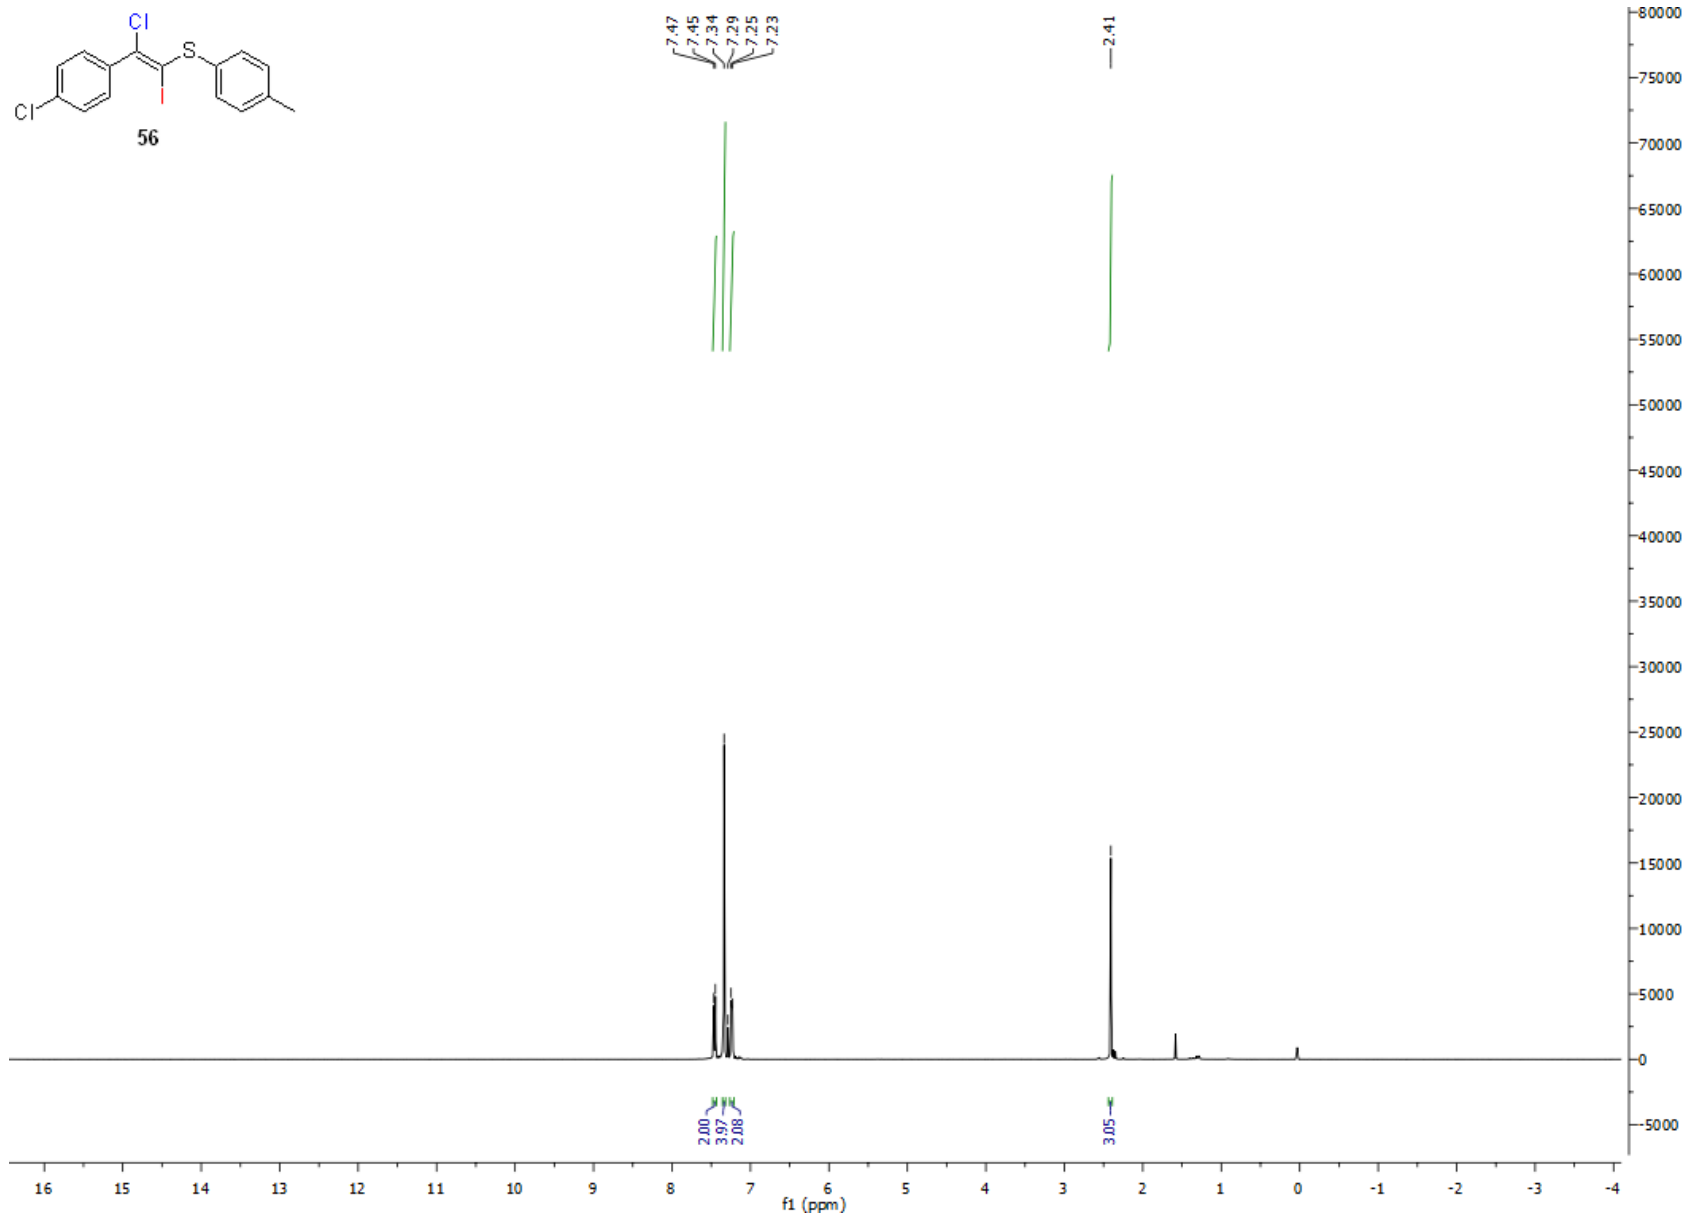



Figure S131. <sup>13</sup>C-NMR of 56

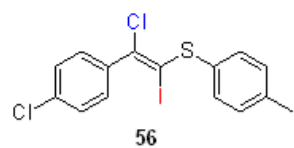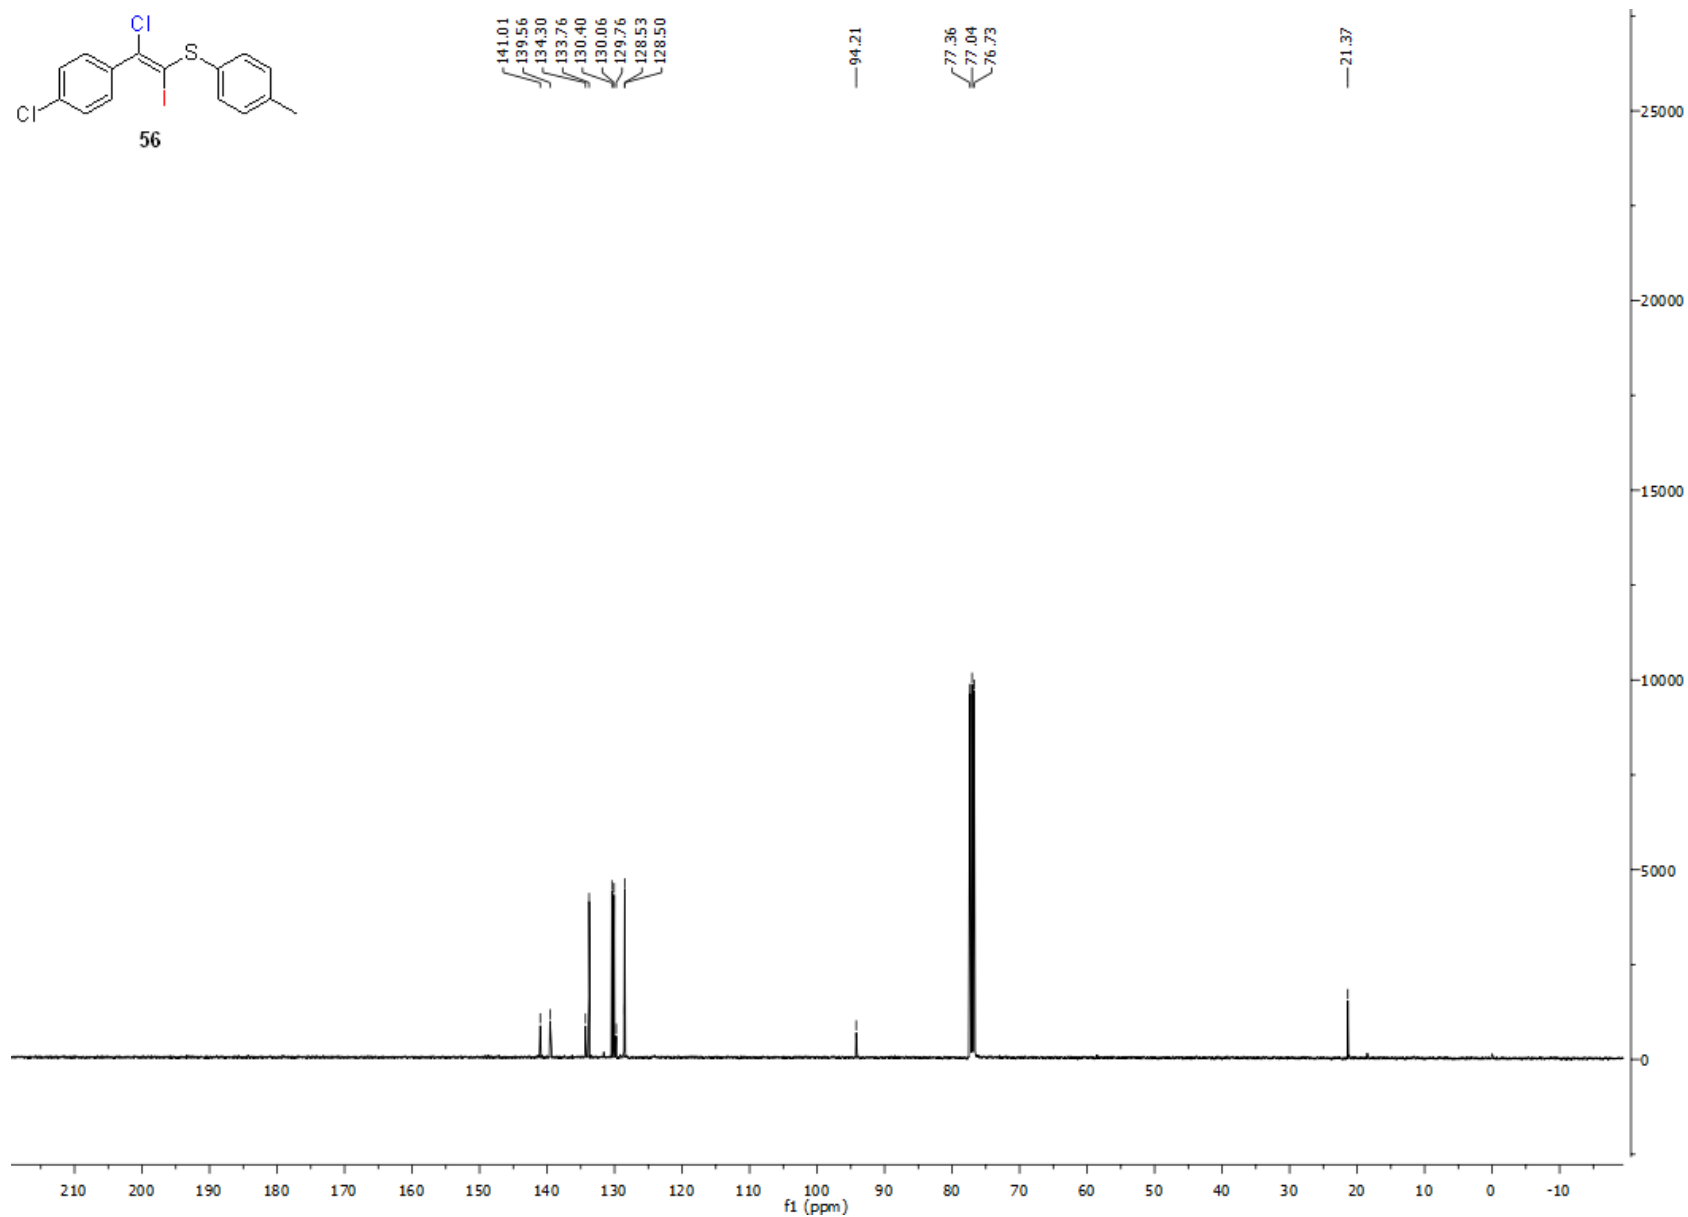

Figure S132. <sup>1</sup>H-NMR of 57

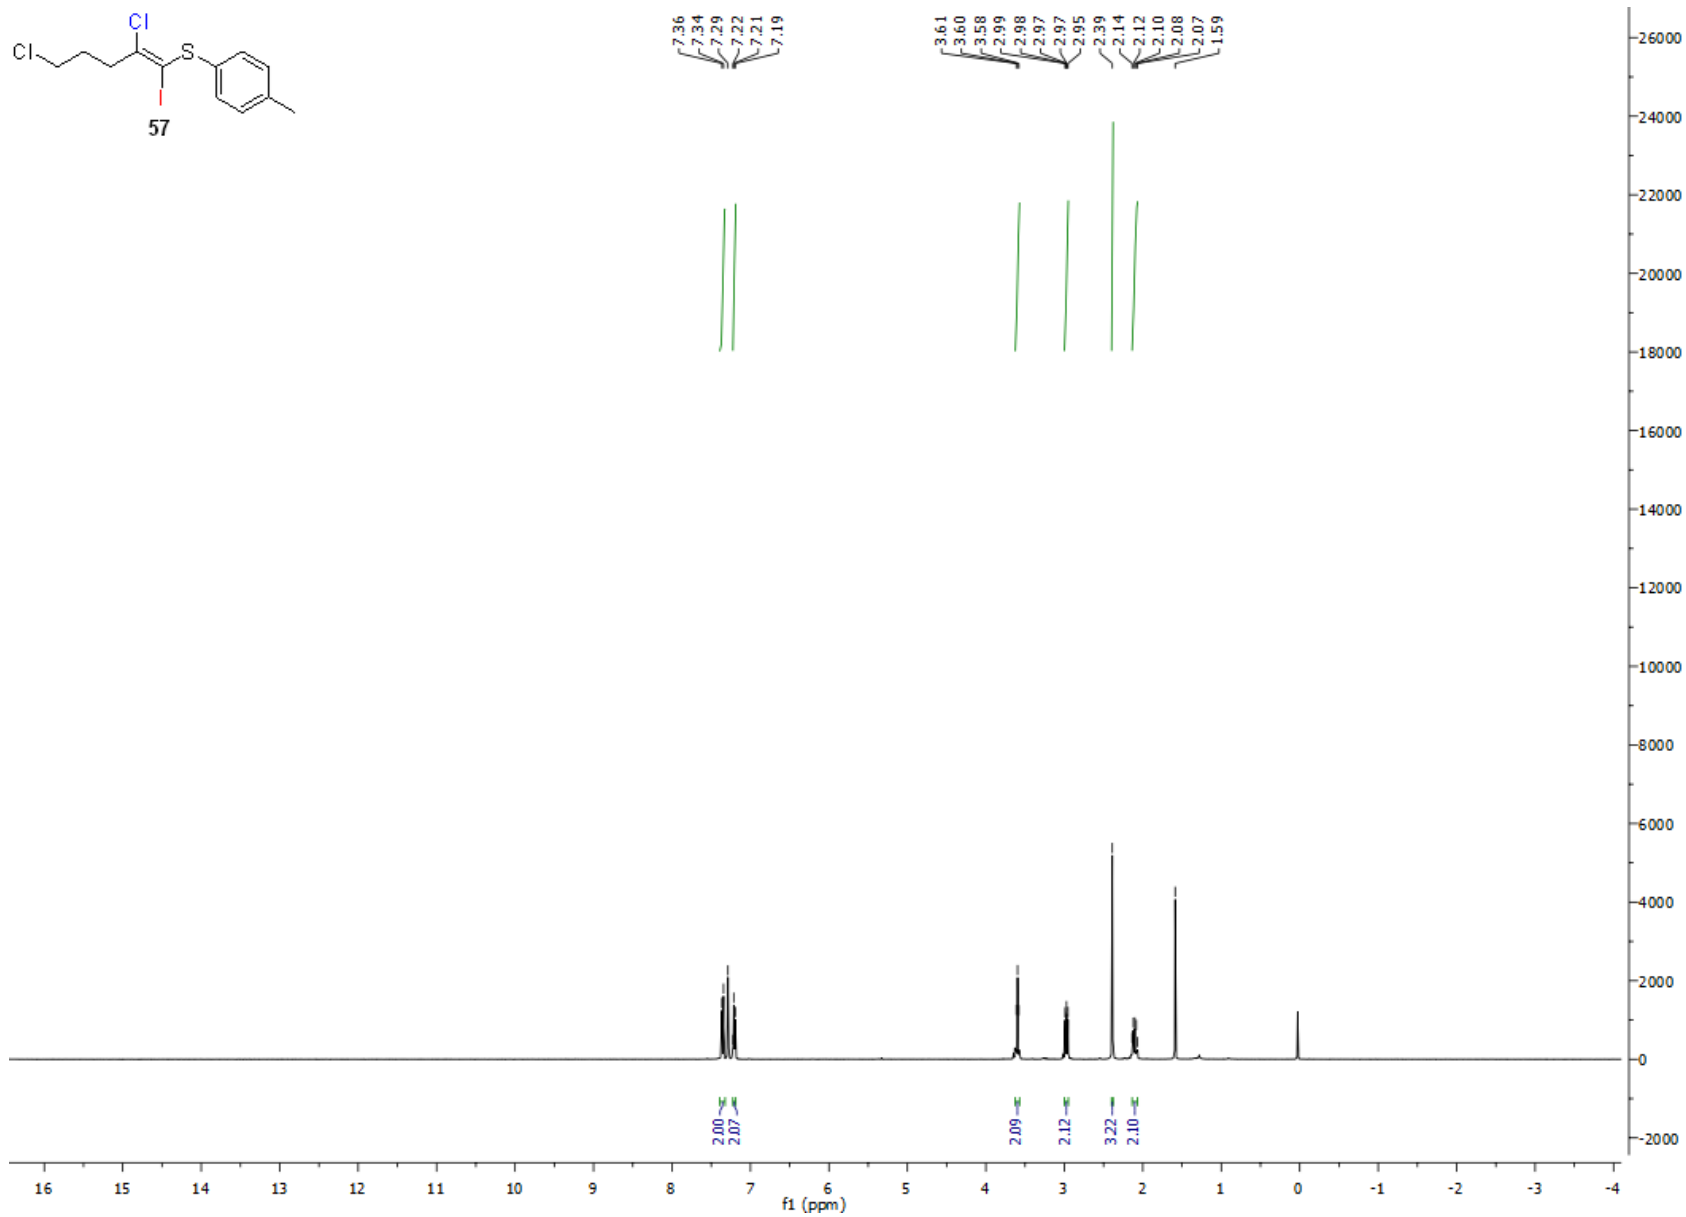

Figure S133. <sup>13</sup>C-NMR of 57

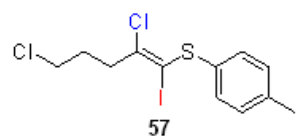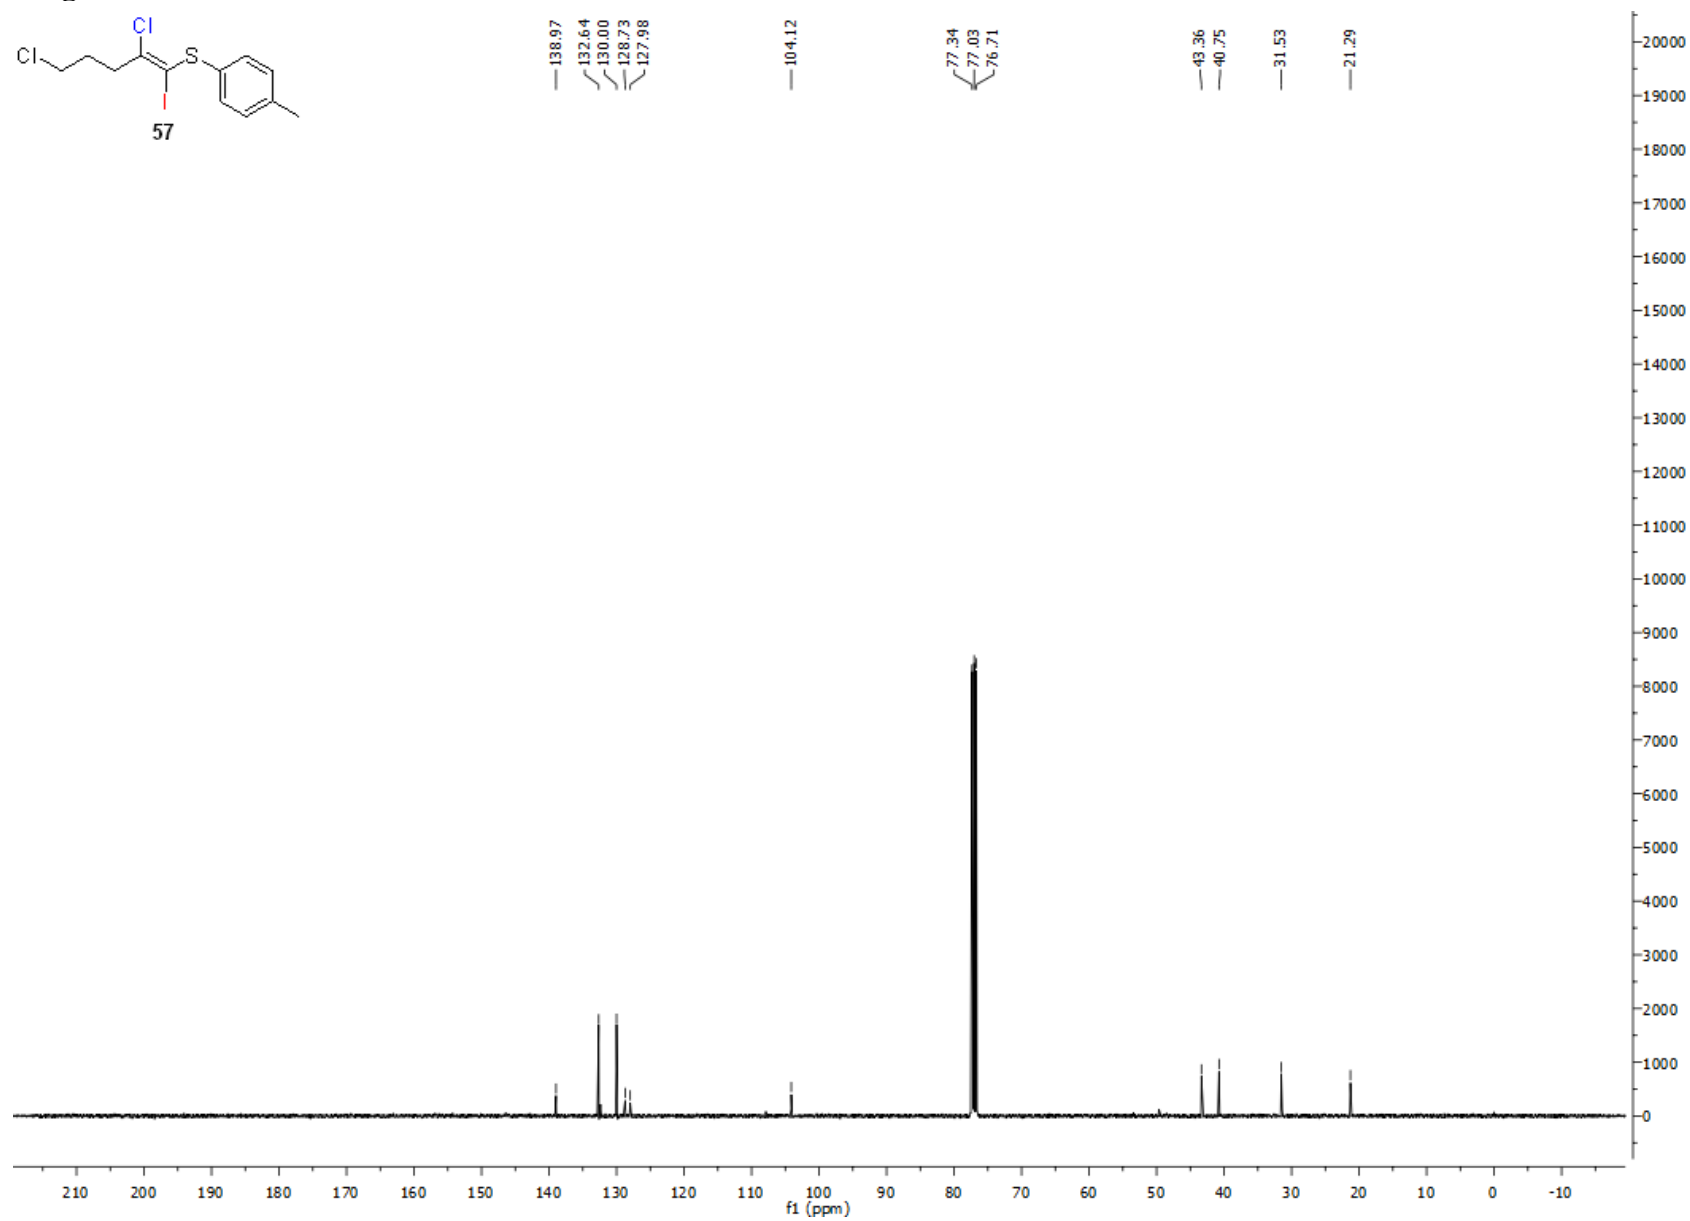

Figure S134. <sup>1</sup>H-NMR of 58

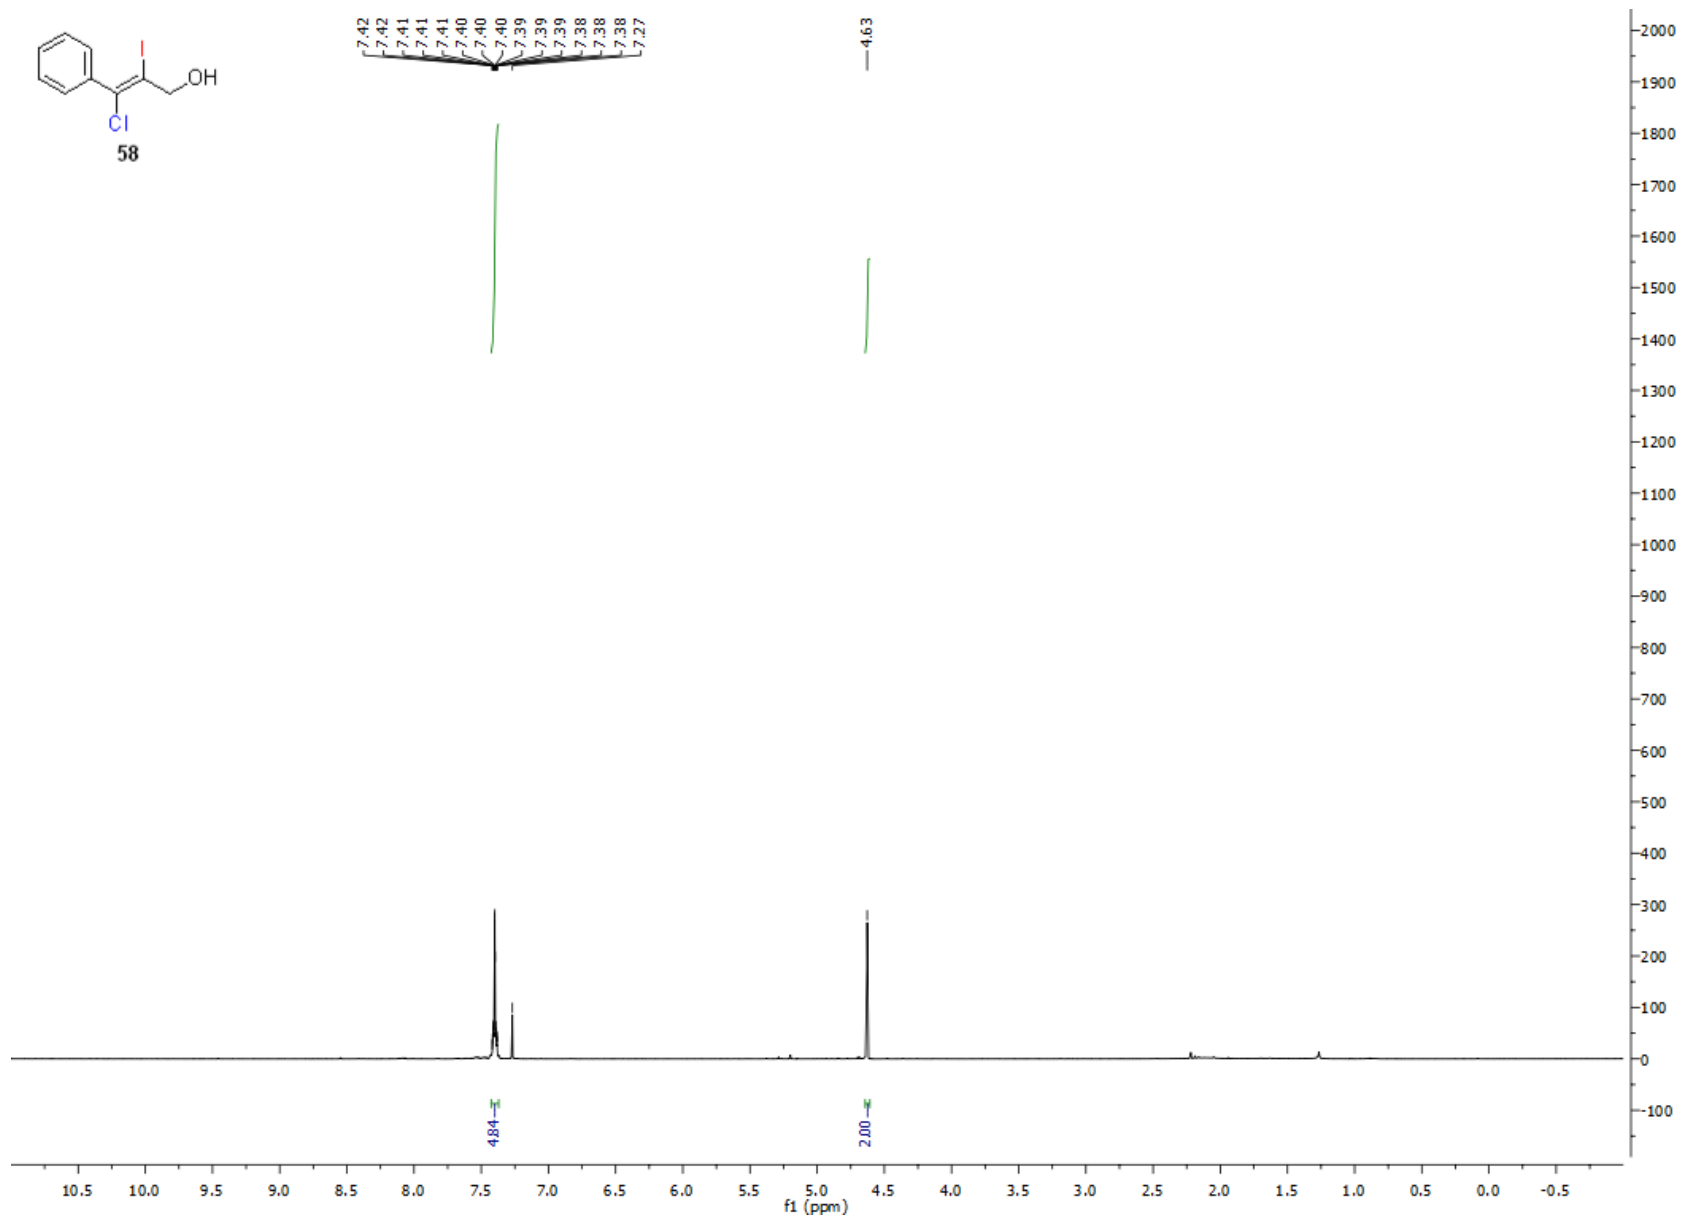

Figure S135.  $^{13}\text{C}$ -NMR of 58

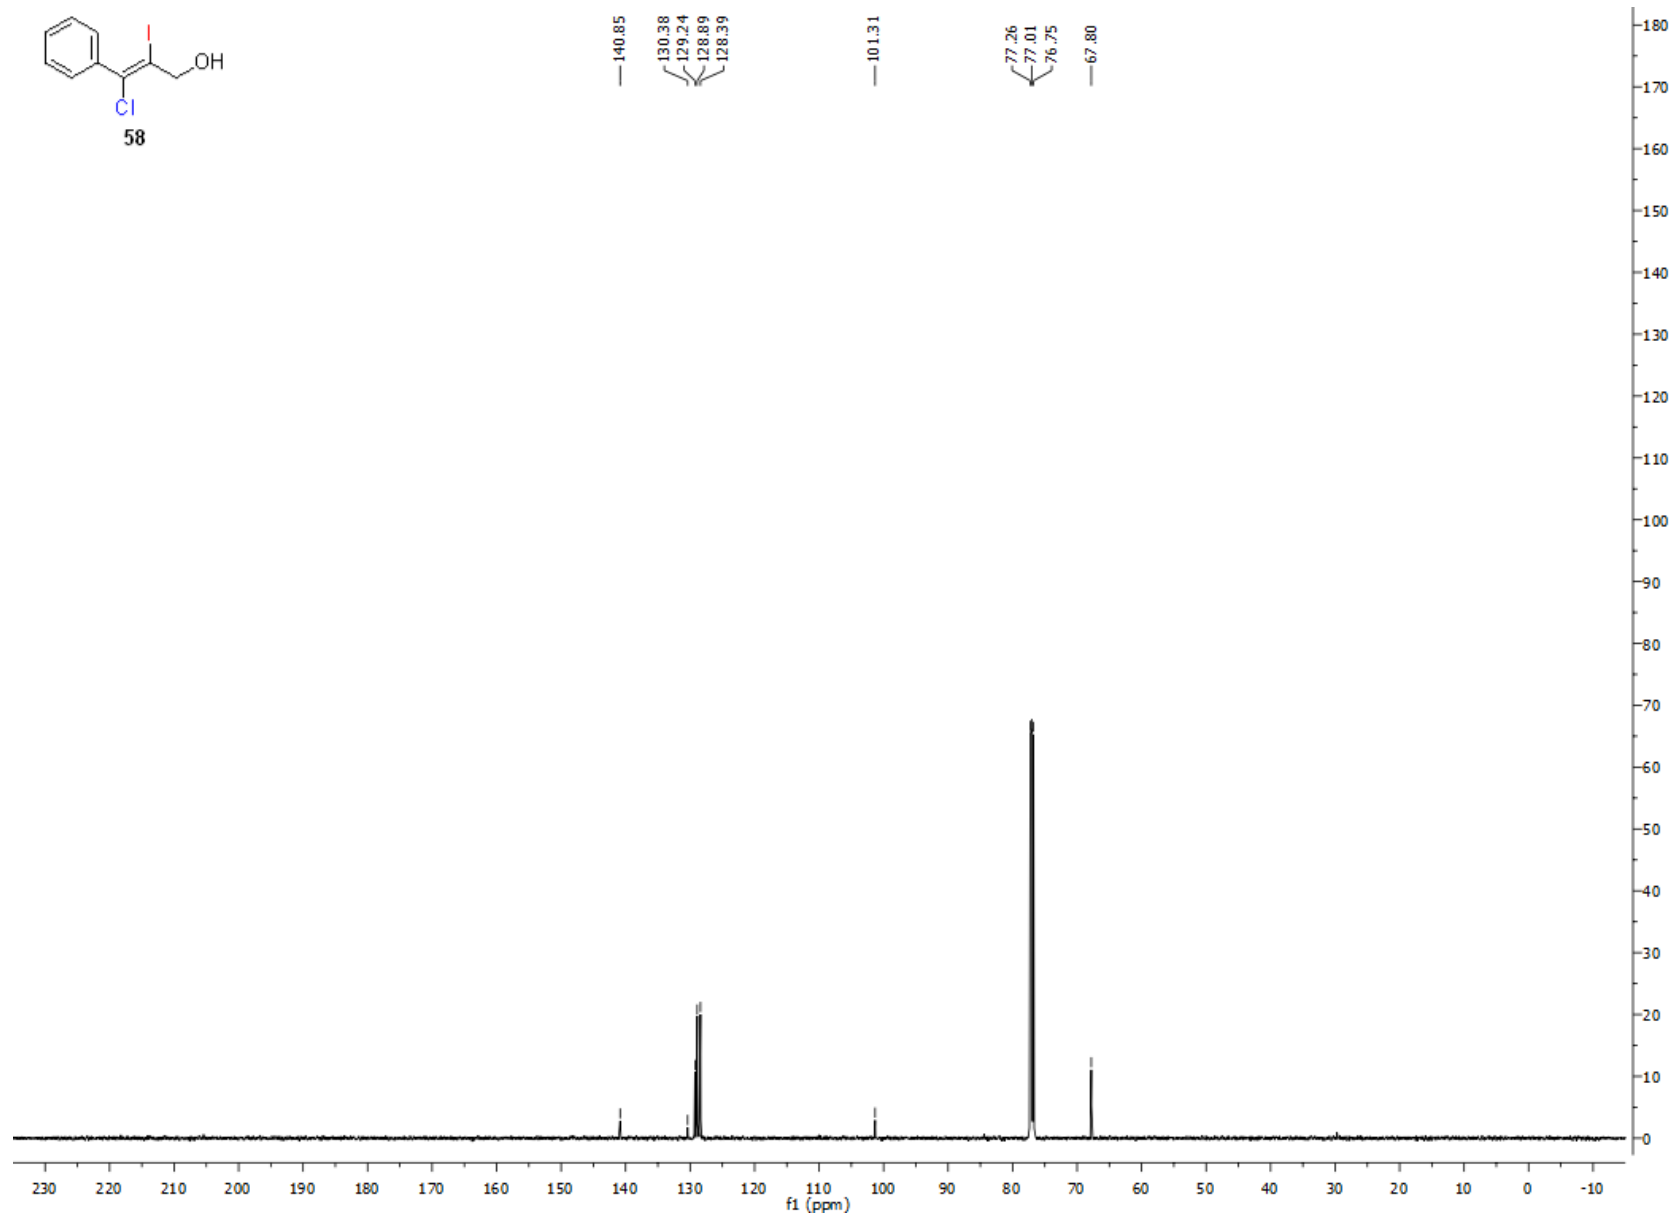

Figure S136. <sup>1</sup>H-NMR of 59

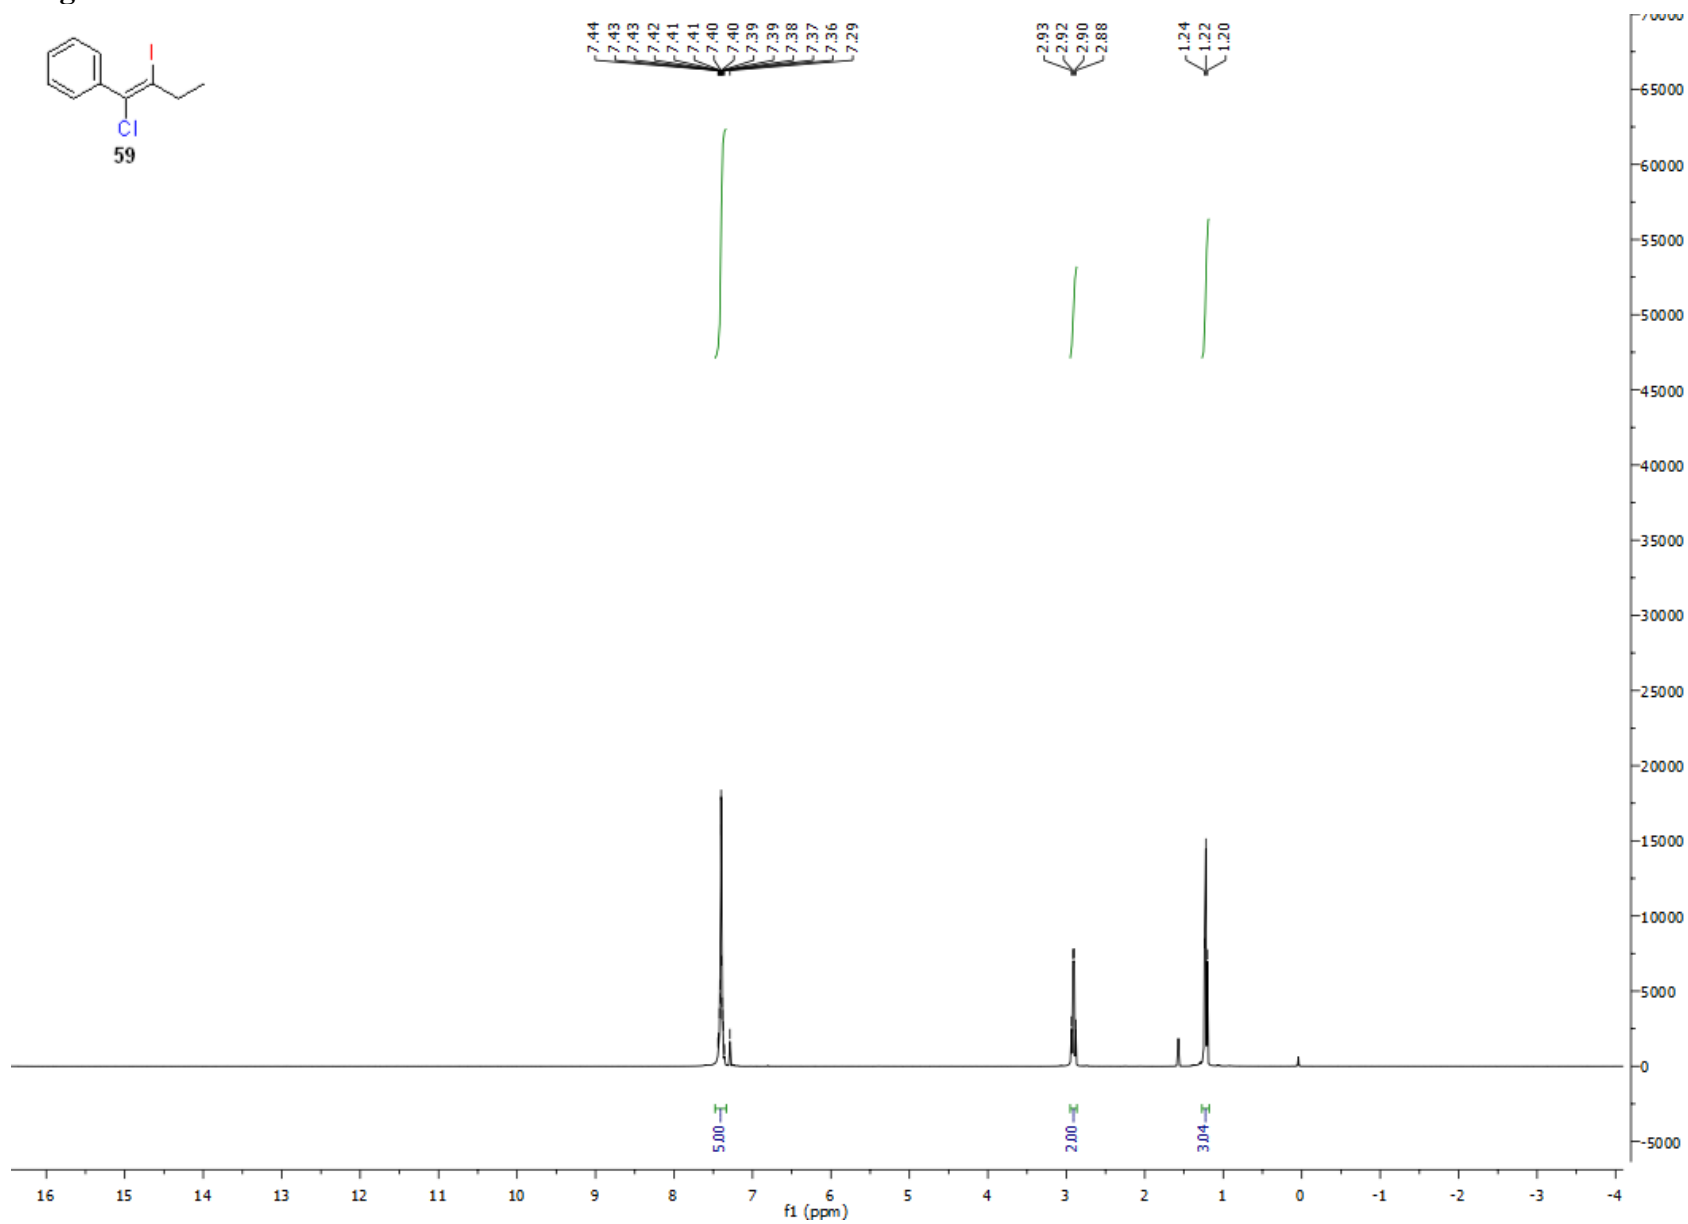

Figure S137.  $^{13}\text{C}$ -NMR of 59

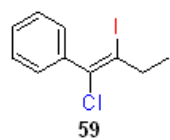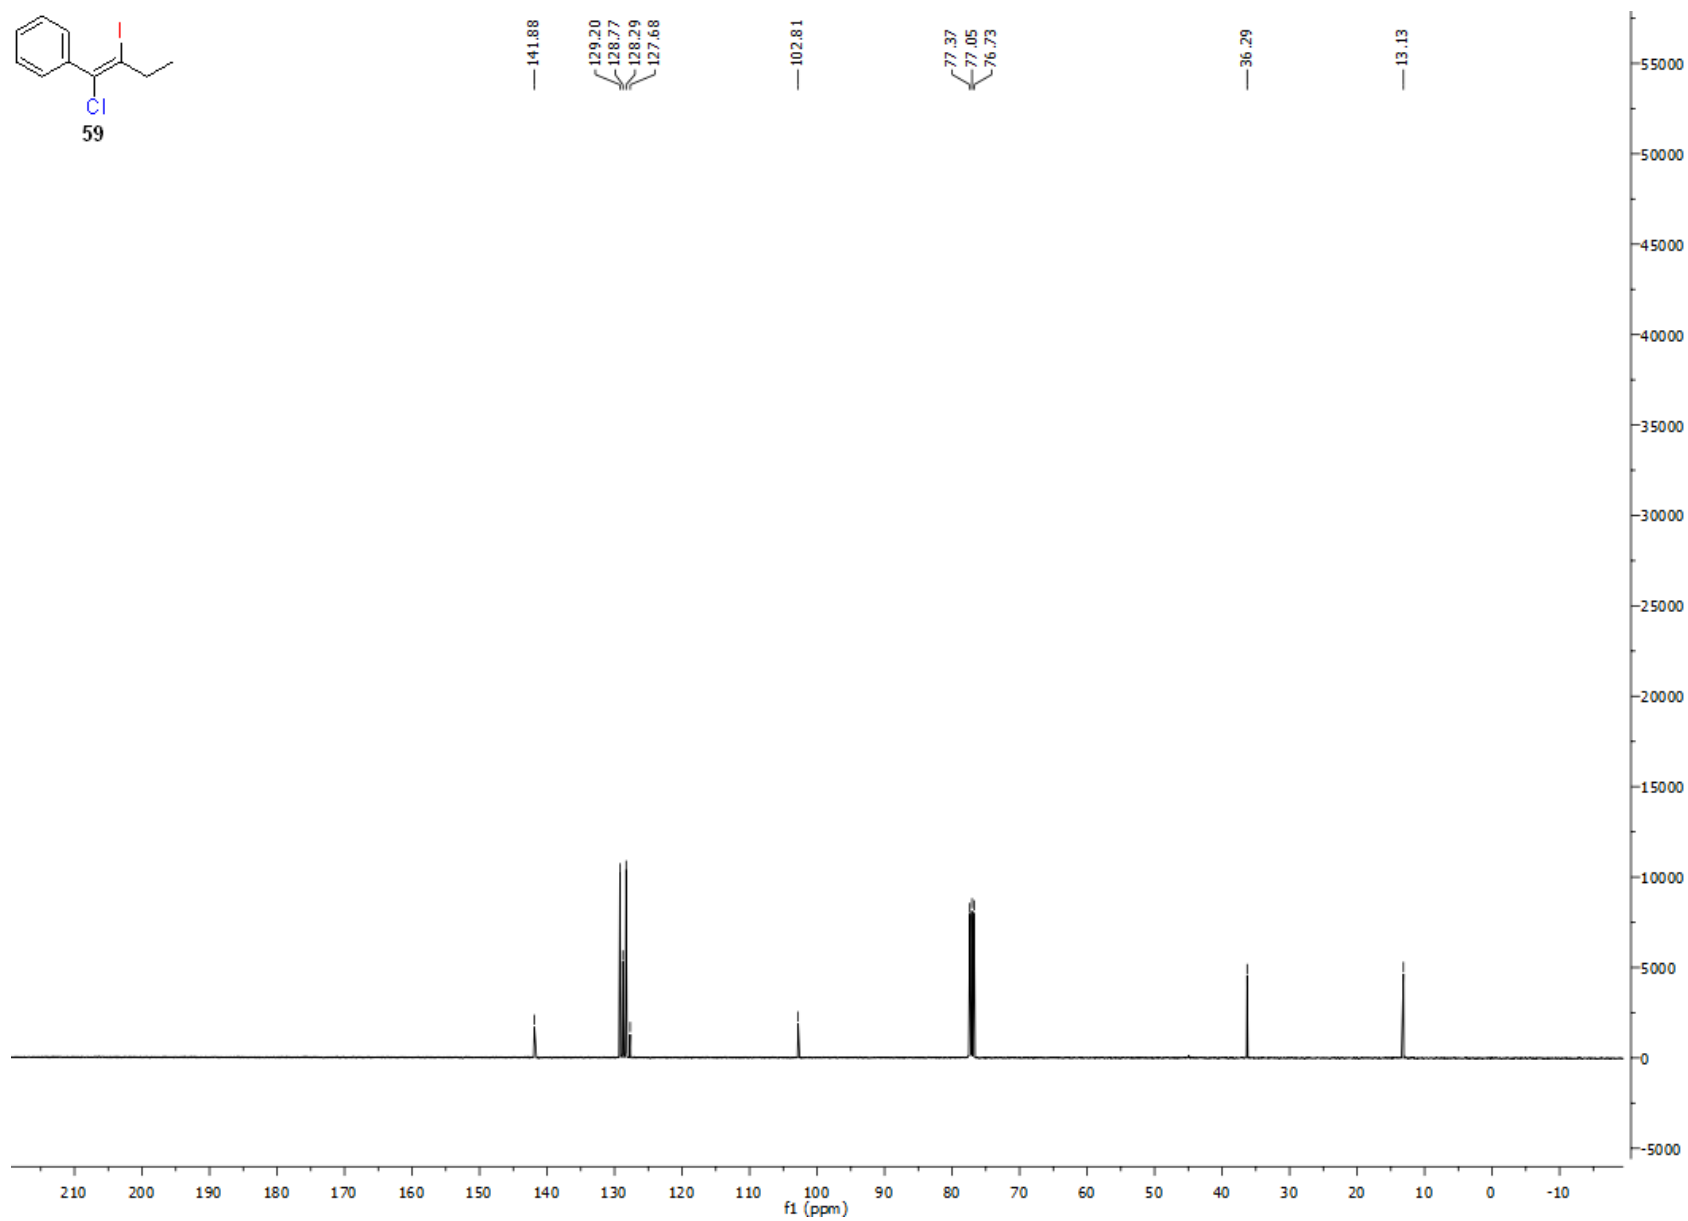

Figure S138. <sup>1</sup>H-NMR of **60**

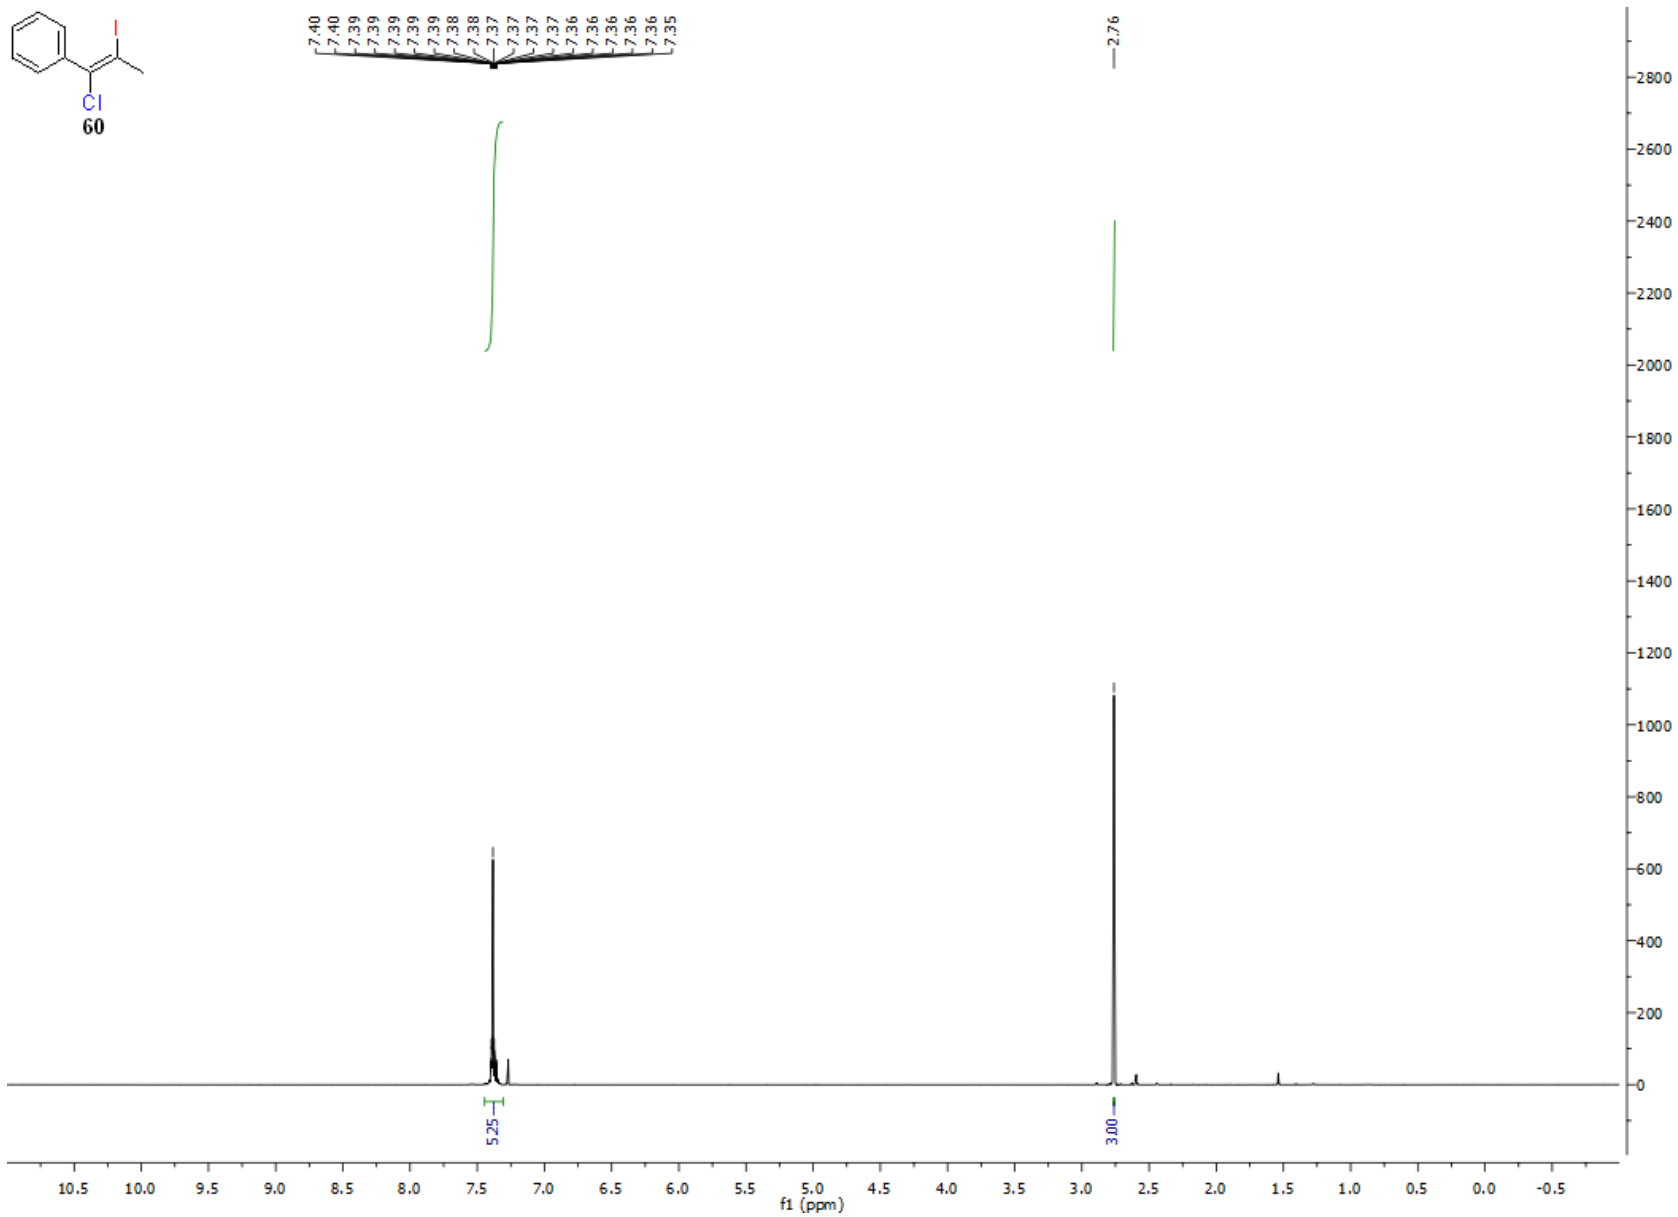



Figure S139.  $^{13}\text{C}$ -NMR of **60**

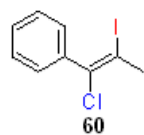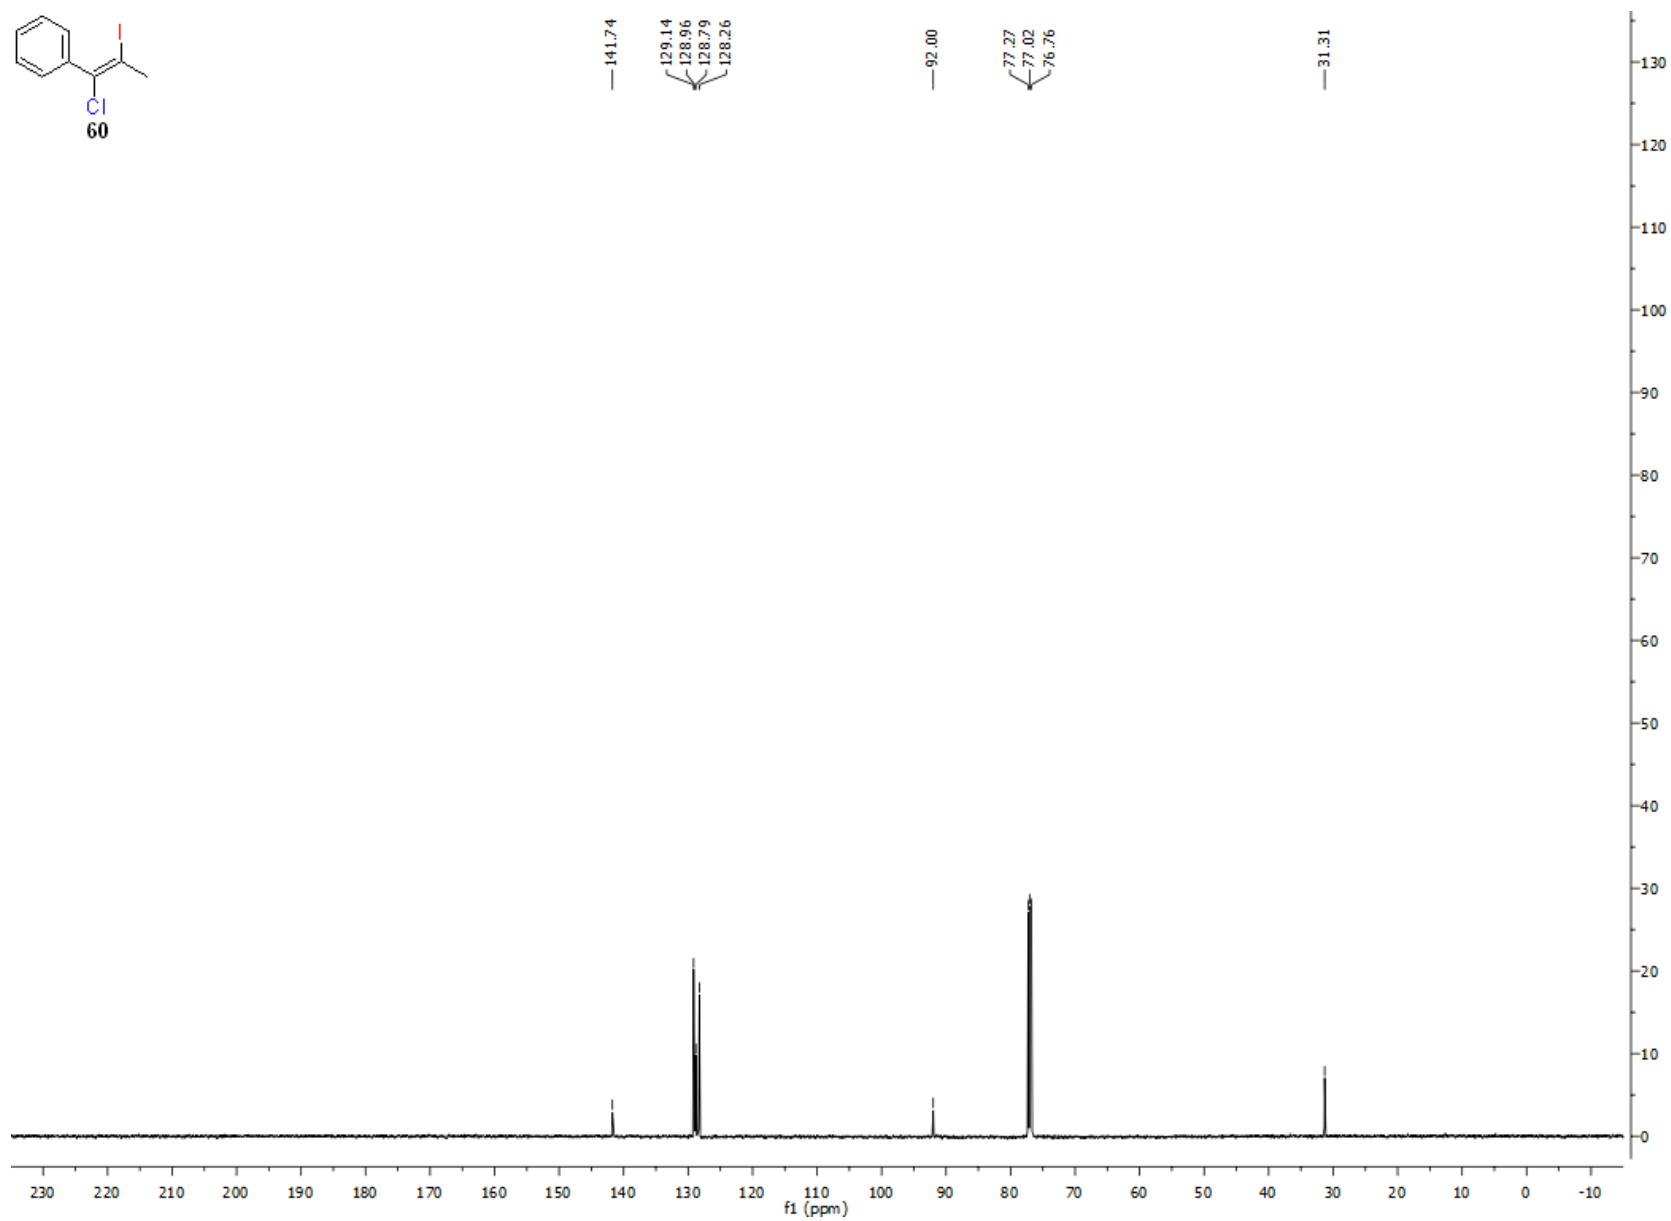

Figure S140. <sup>1</sup>H-NMR of 61

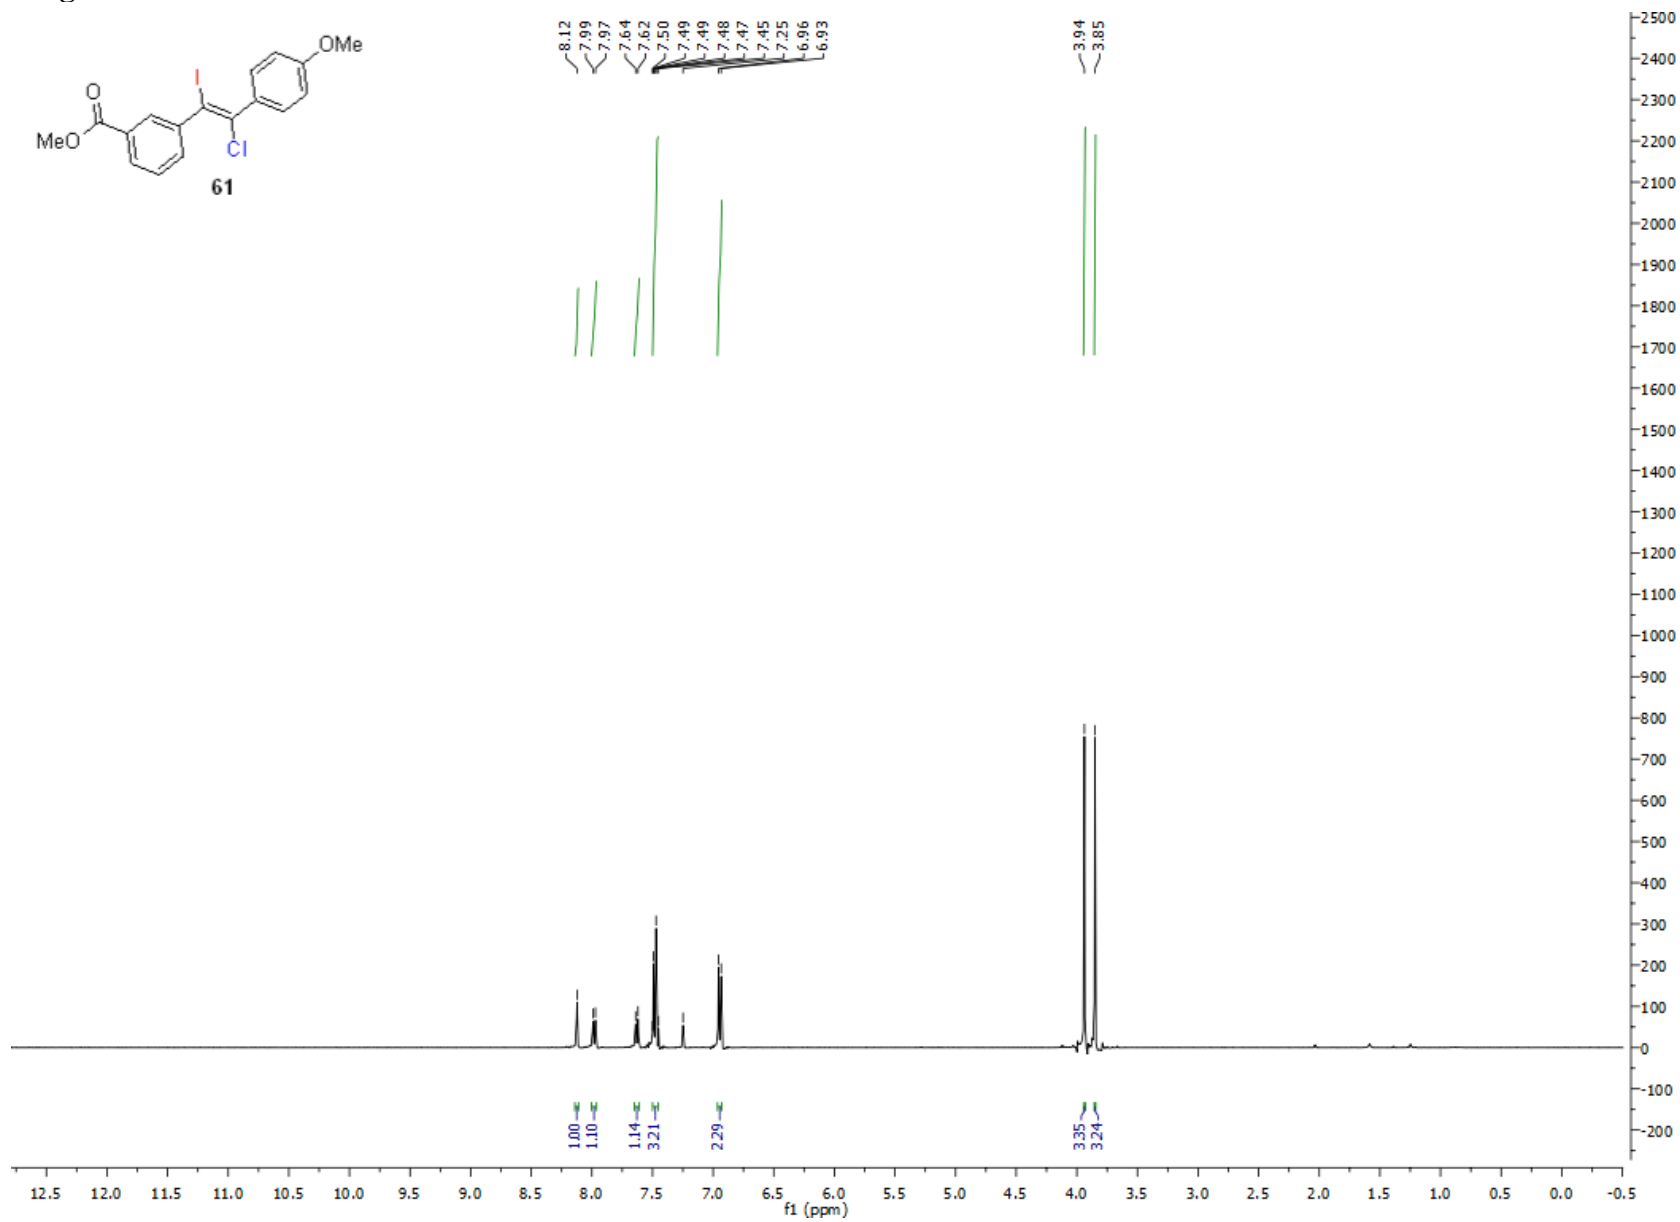

Figure S141.  $^{13}\text{C}$ -NMR of **61**

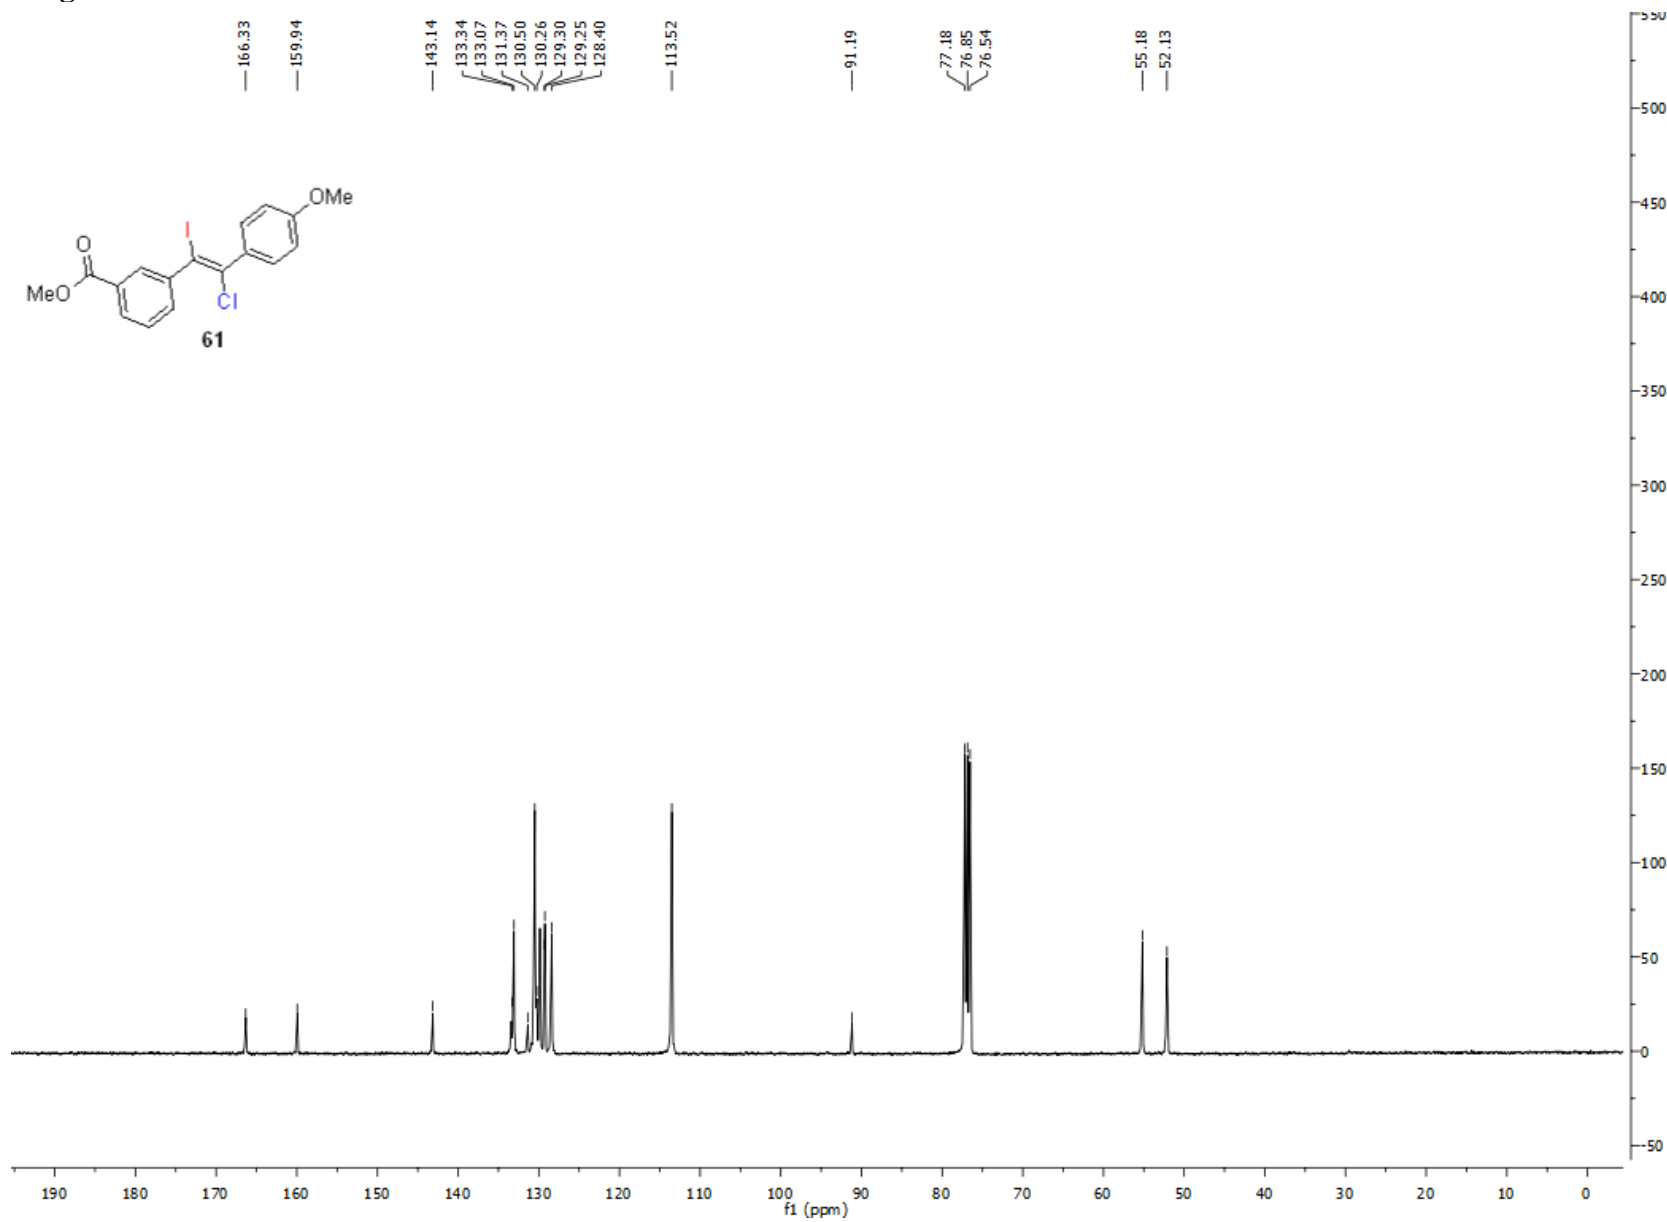

Figure S142. <sup>1</sup>H-NMR of 62

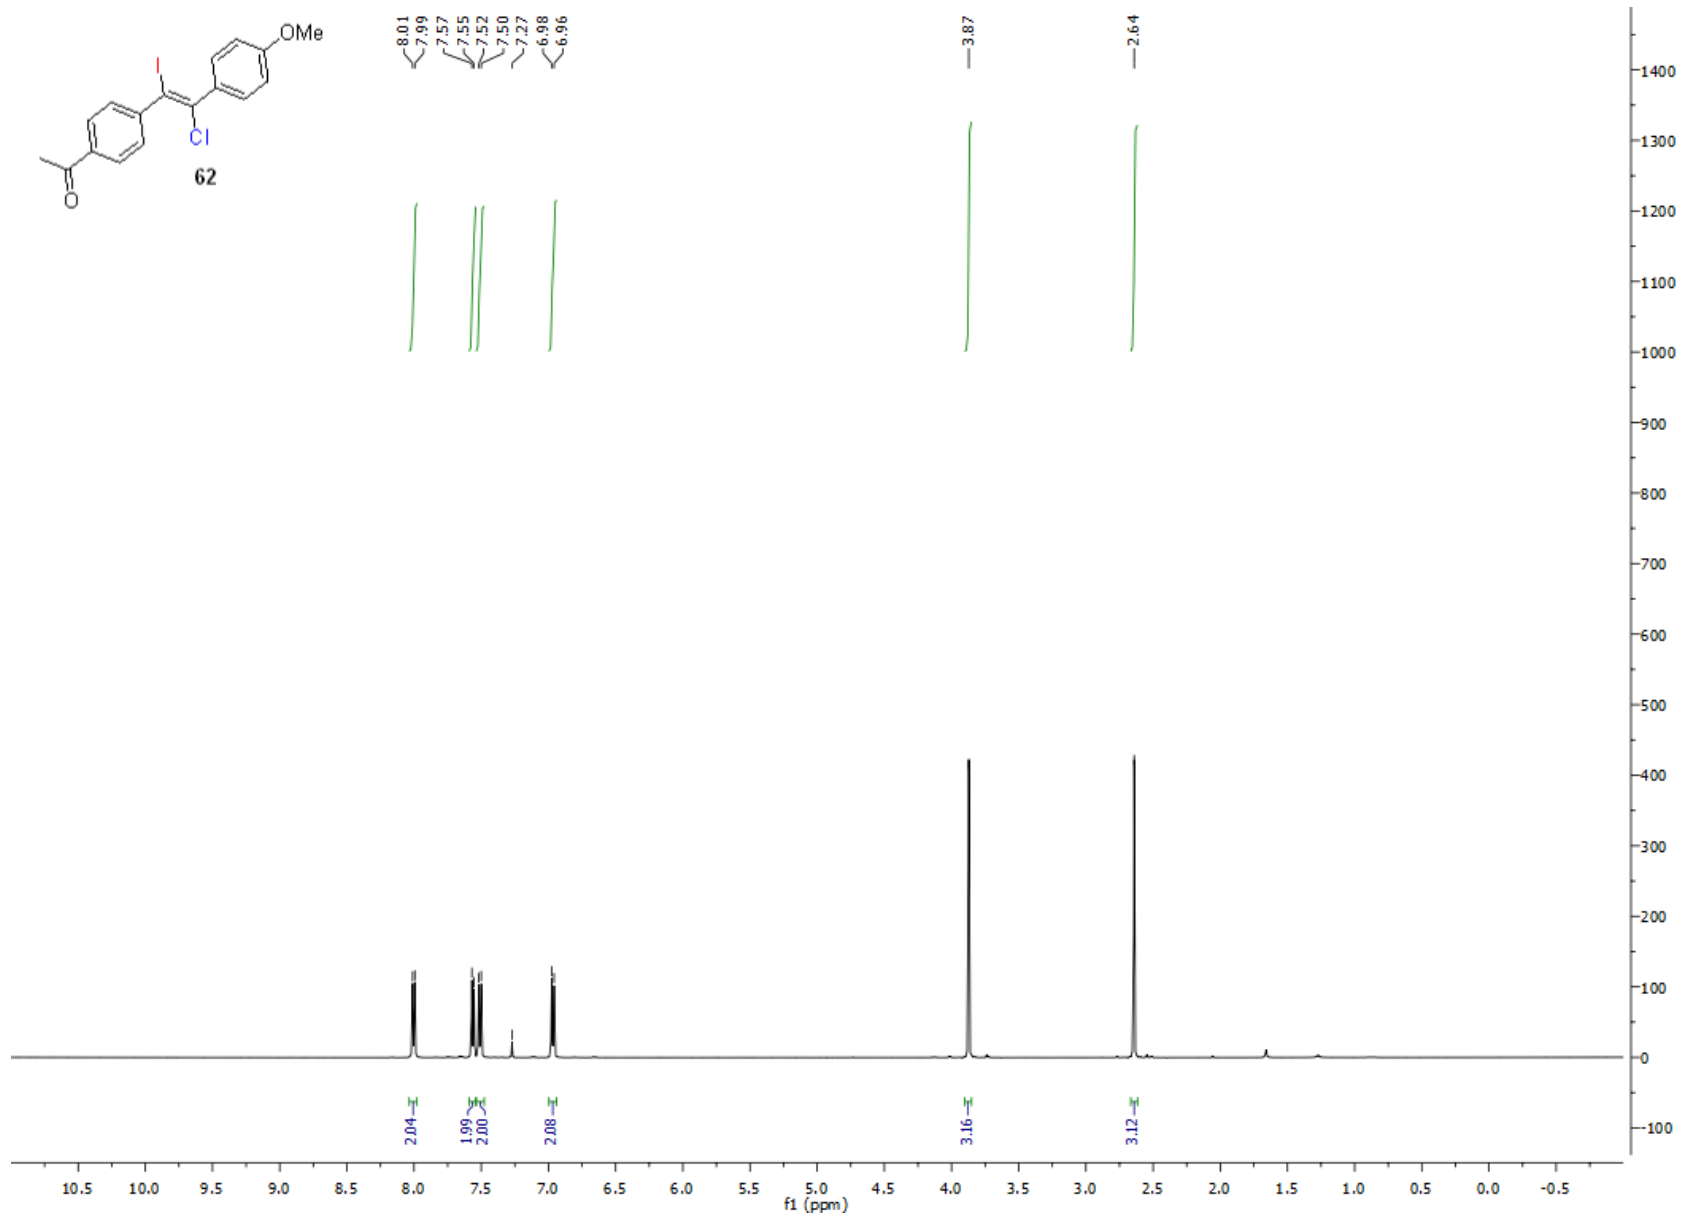

Figure S143.  $^{13}\text{C}$ -NMR of **62**

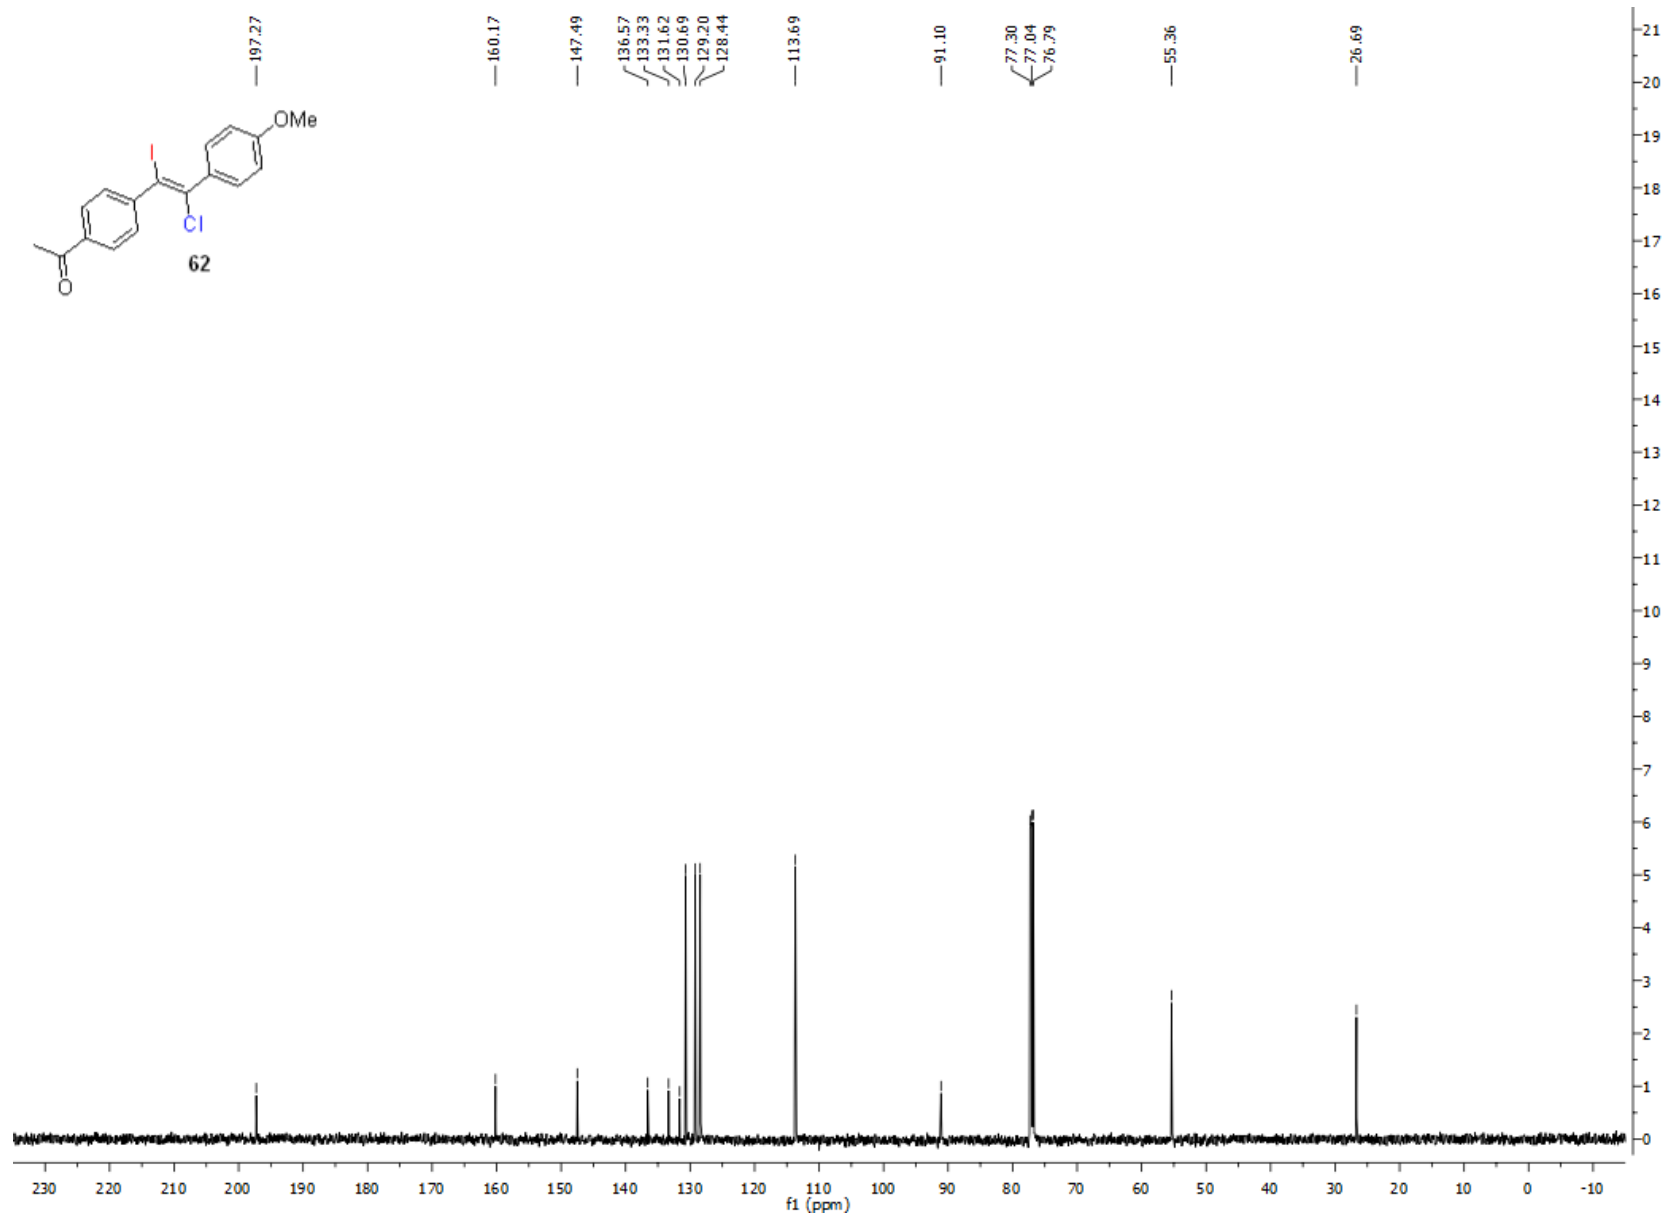

Figure S144. <sup>1</sup>H-NMR of 63

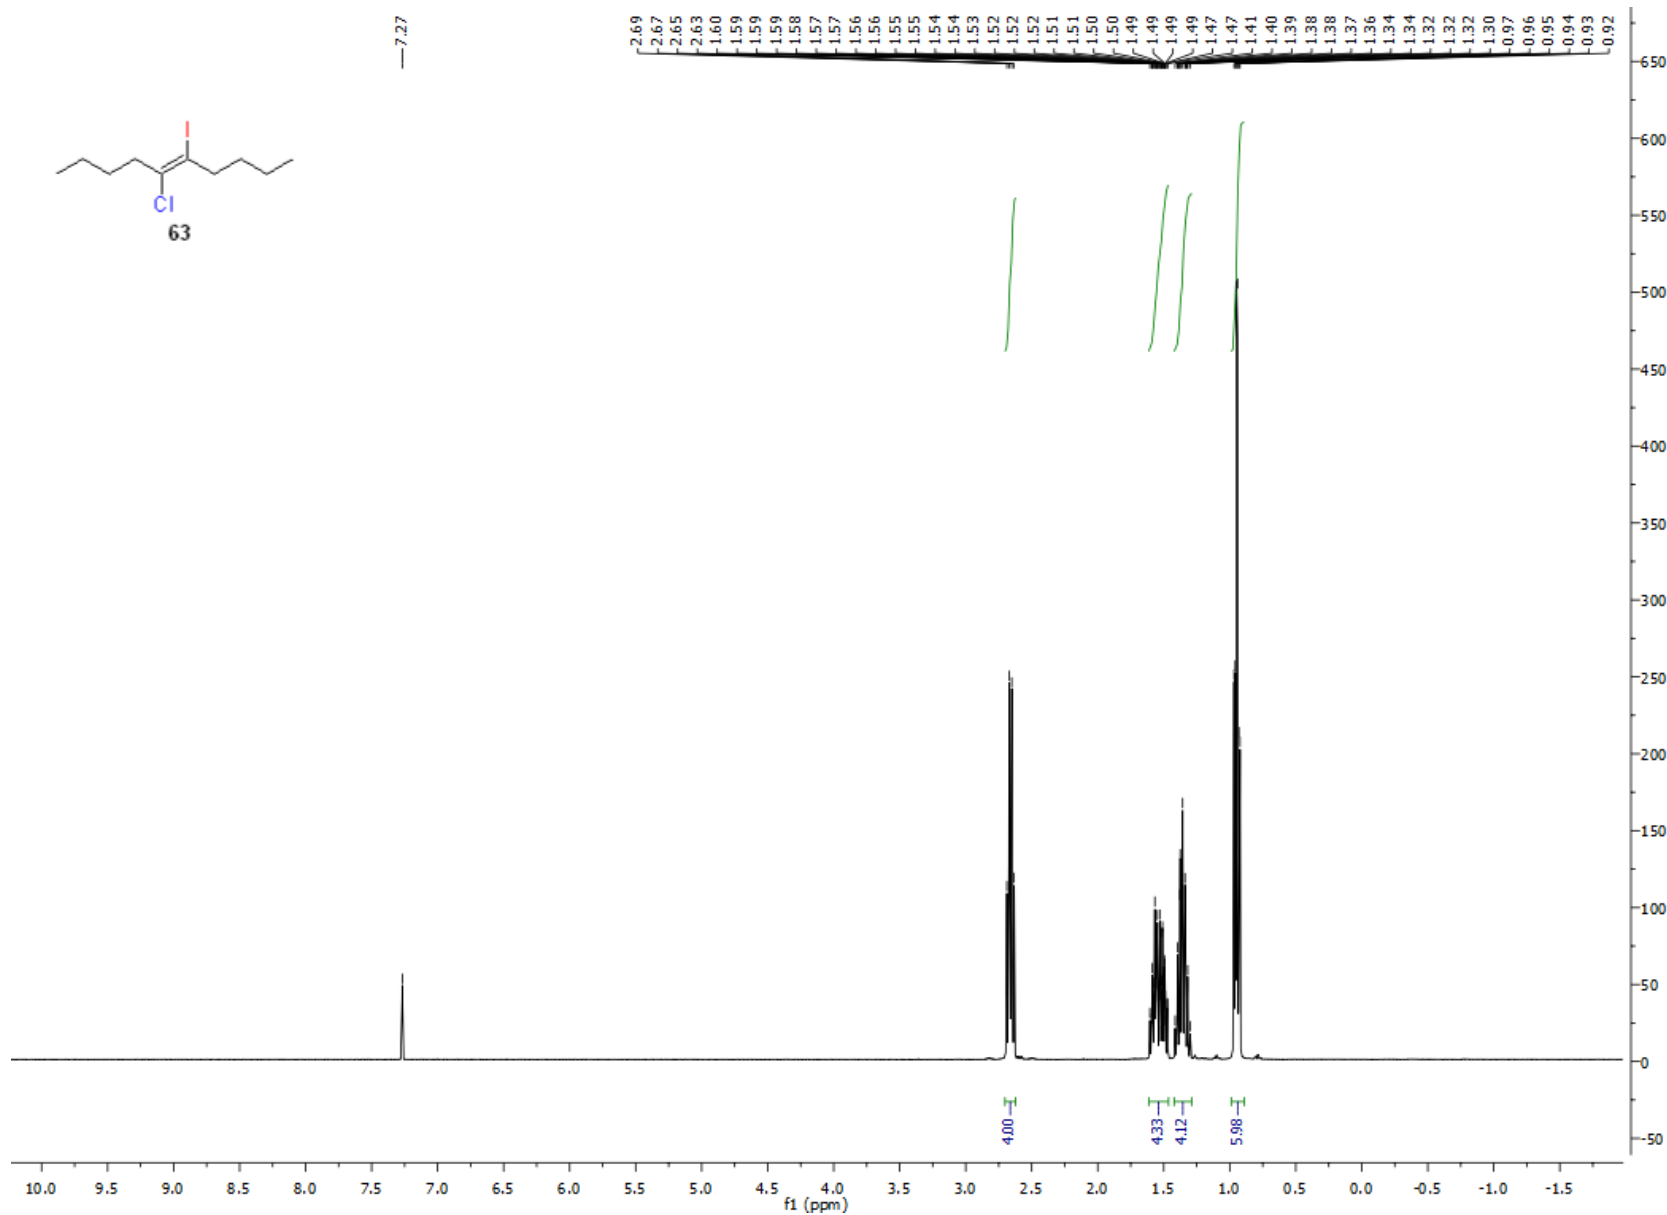

Figure S145.  $^{13}\text{C}$ -NMR of **63**

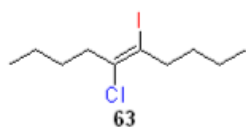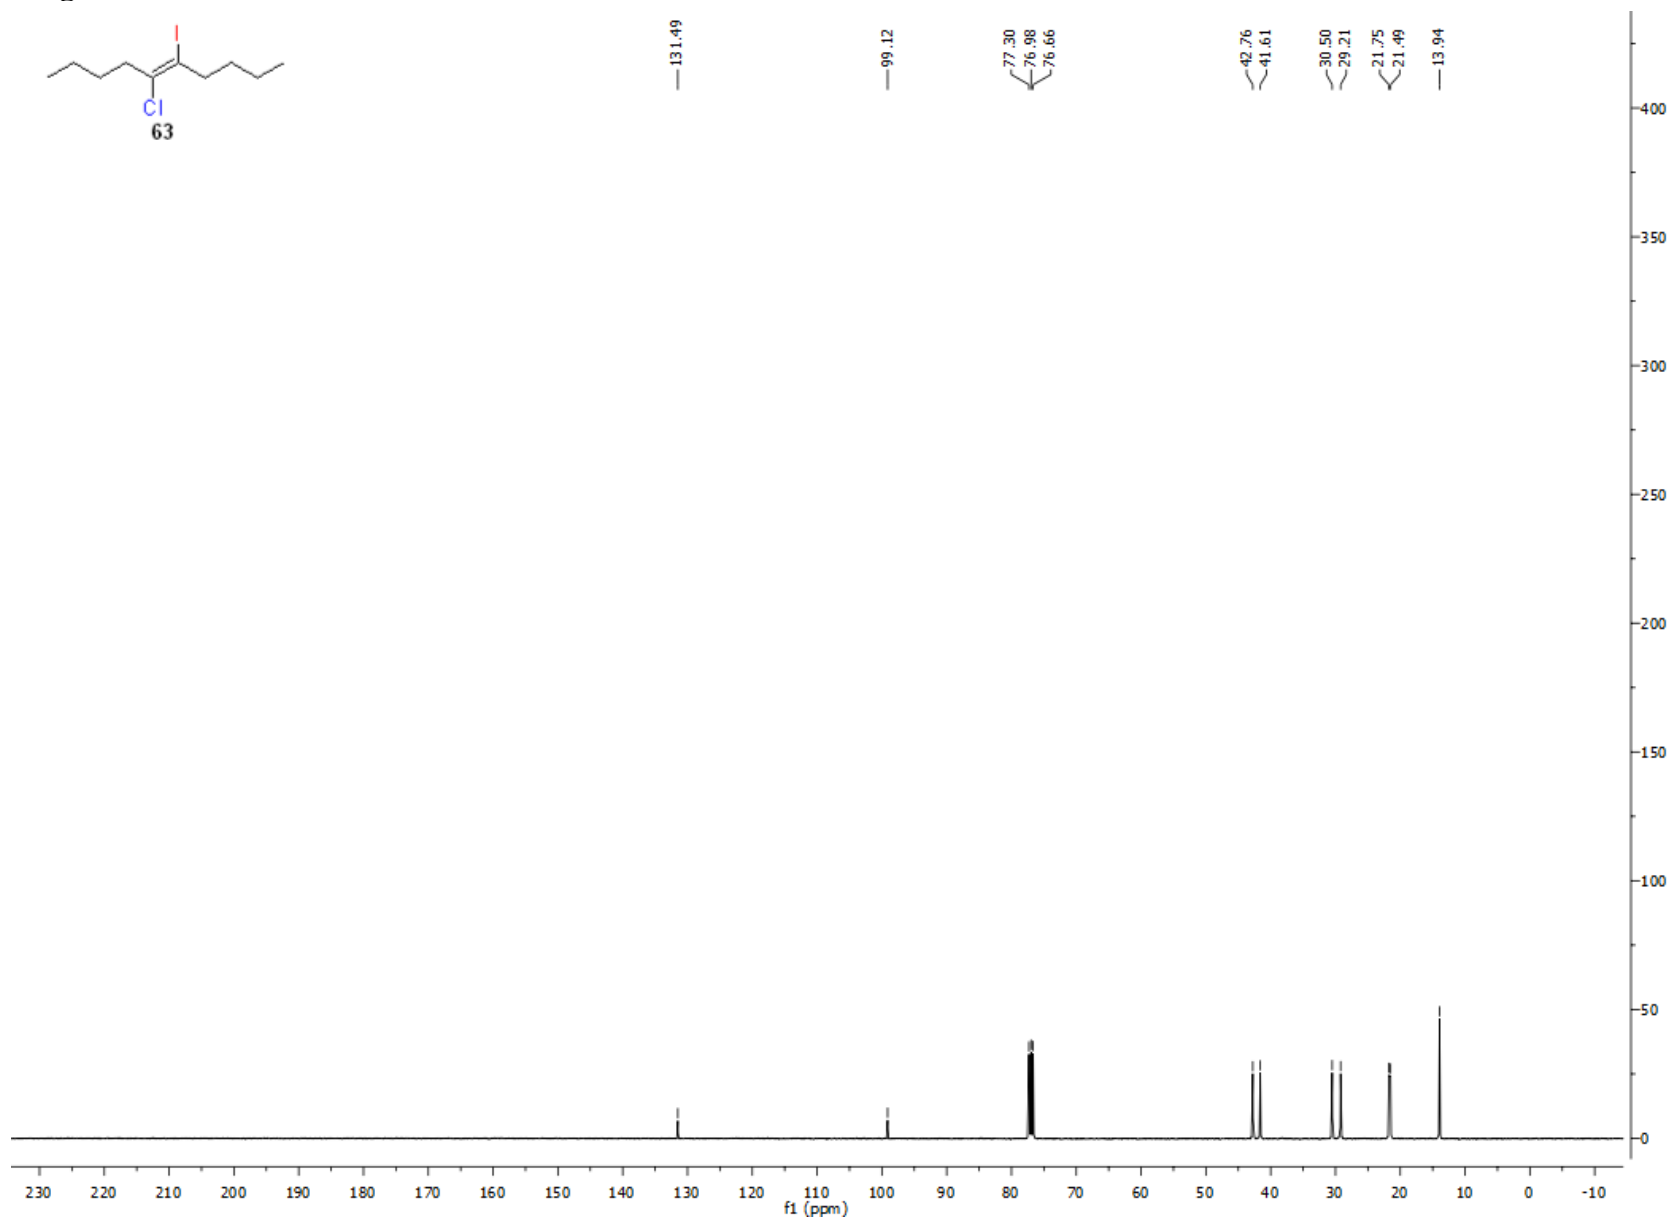

Figure S146. <sup>1</sup>H-NMR of 64

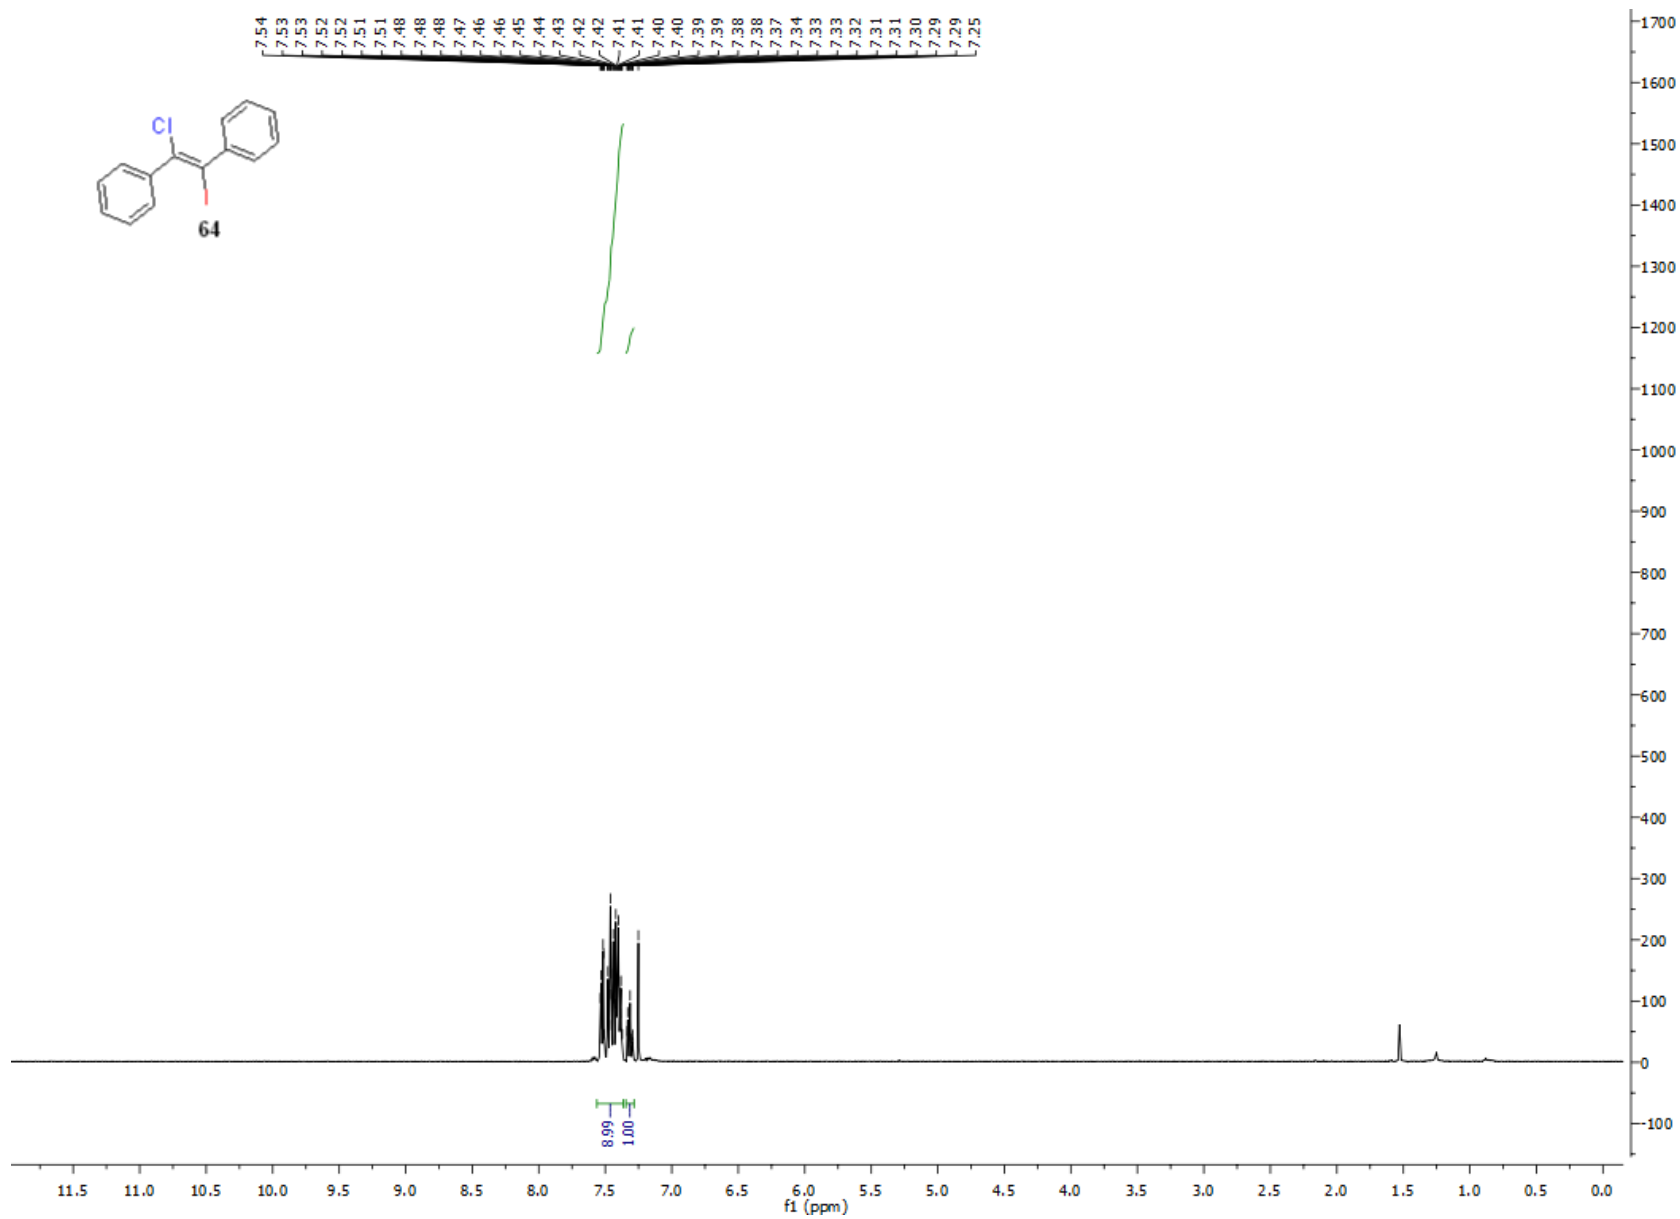



Figure S147.  $^{13}\text{C}$ -NMR of **64**

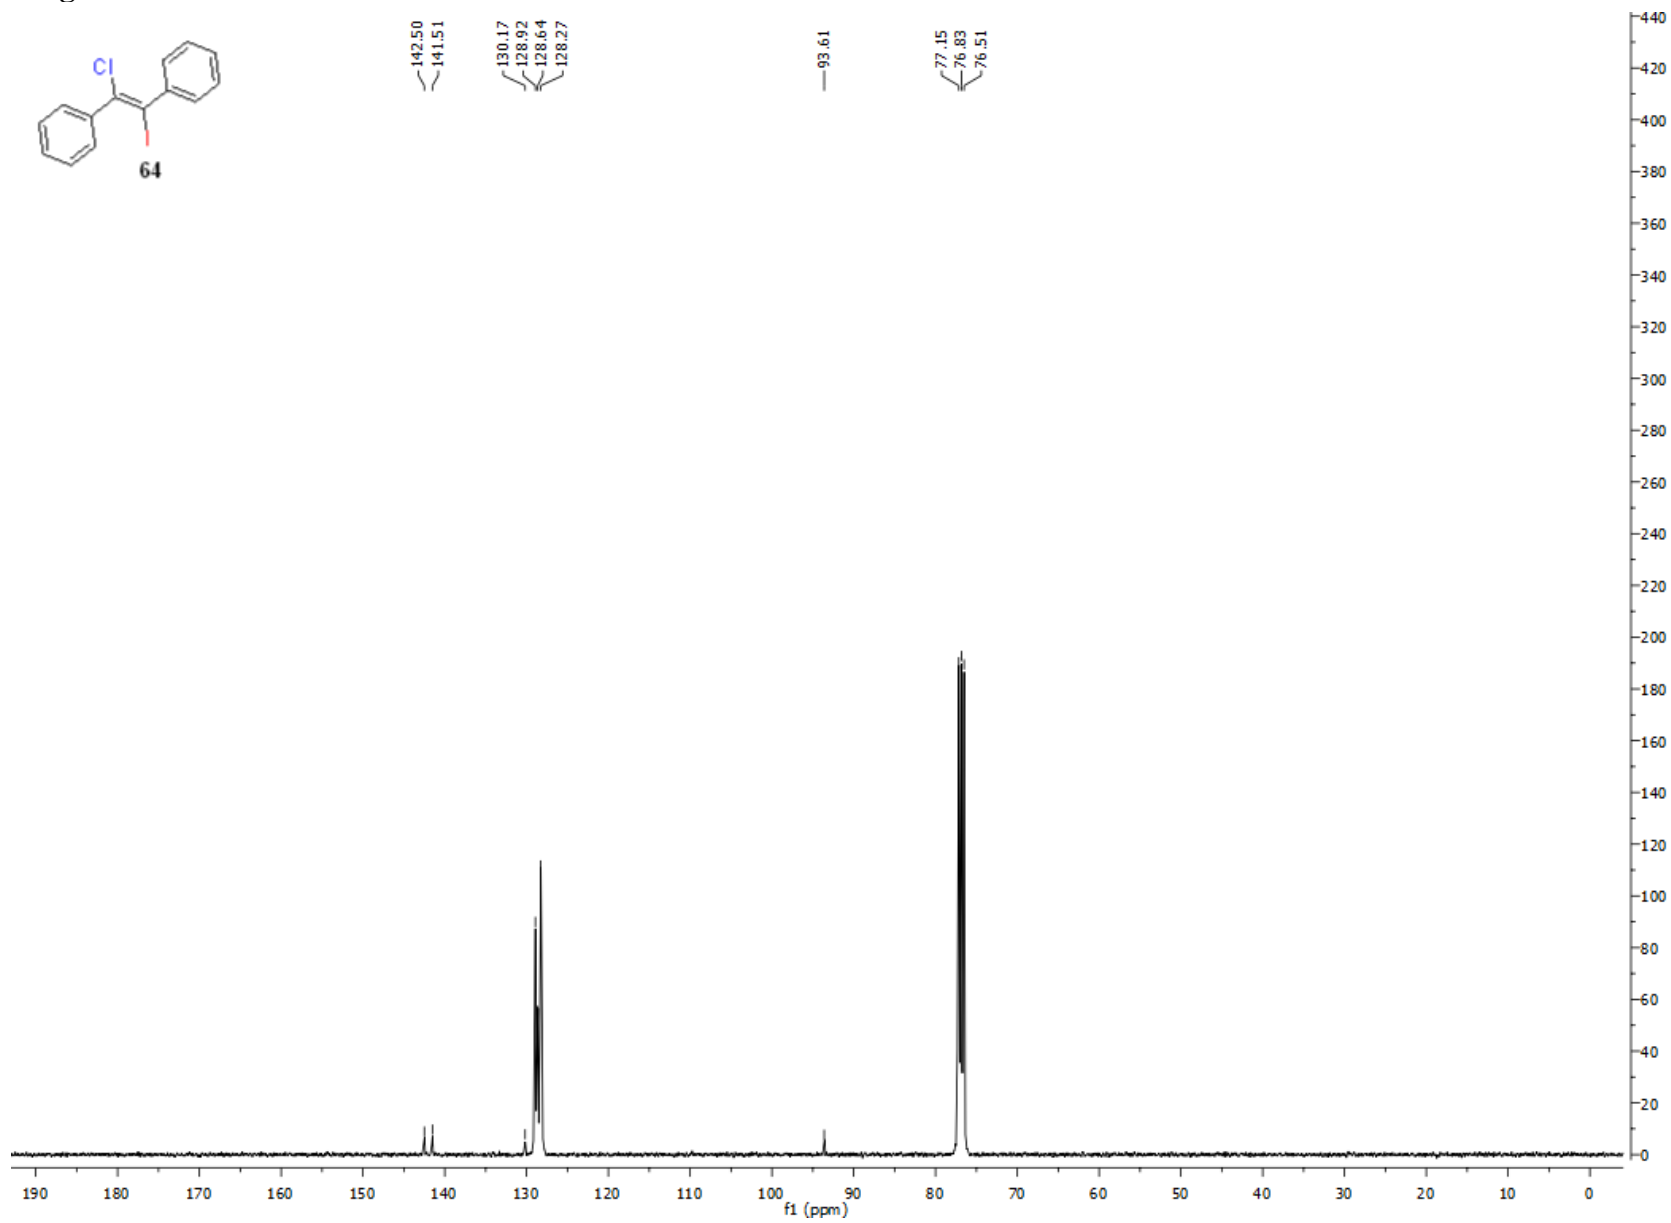

Figure S148. <sup>1</sup>H-NMR of 65

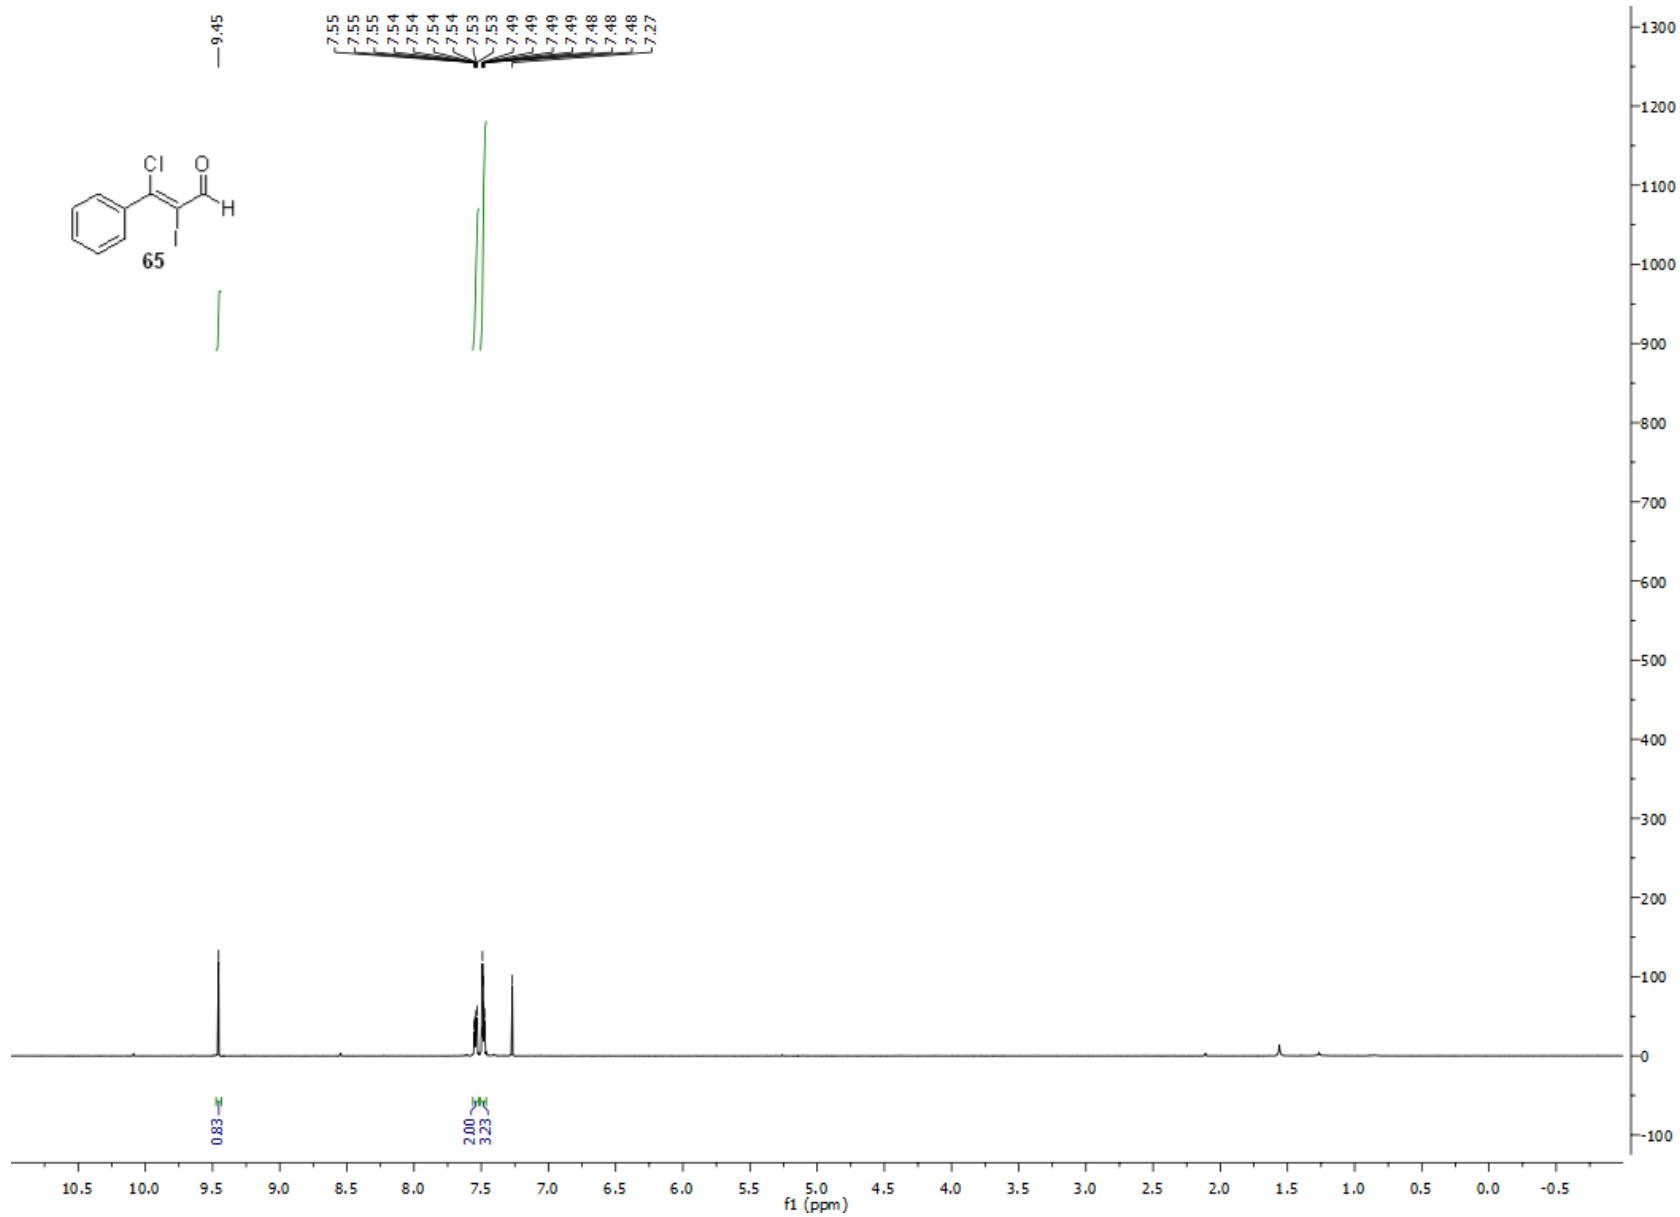

Figure S149.  $^{13}\text{C}$ -NMR of **65**

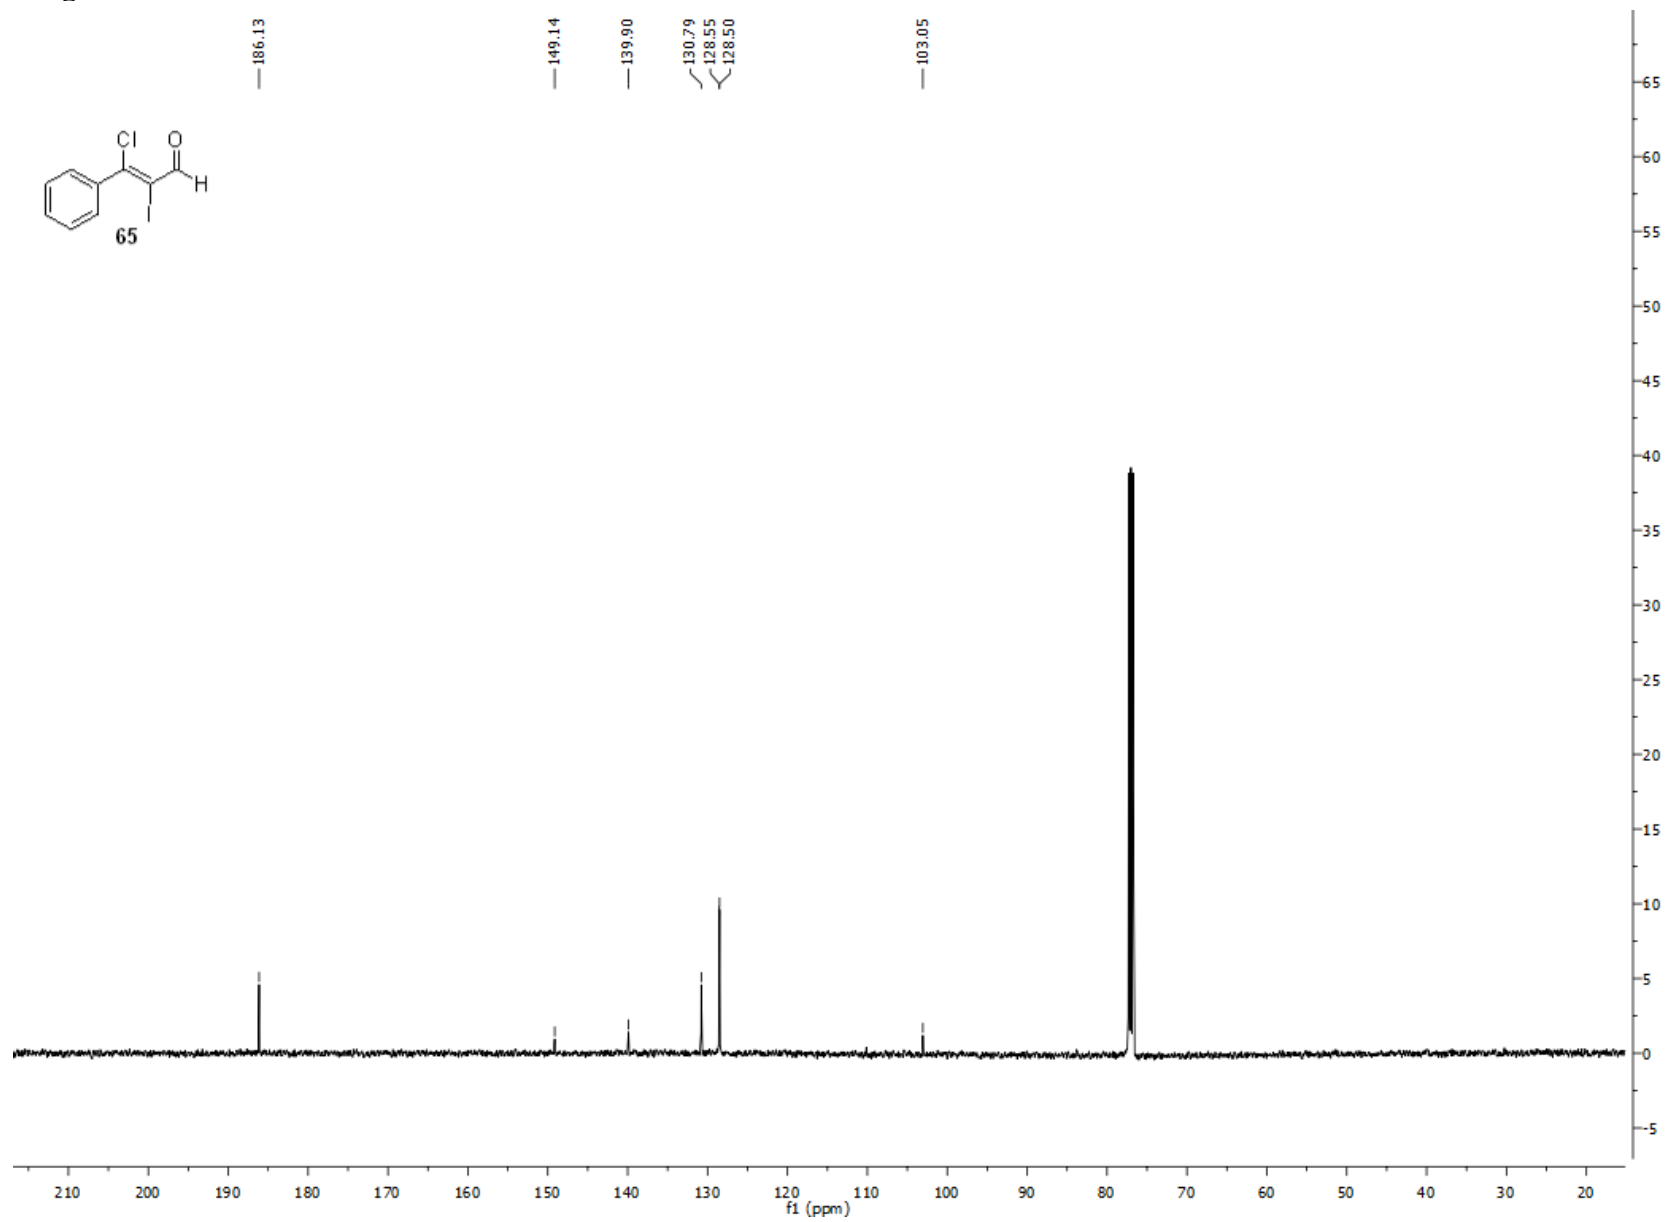

Figure S150. <sup>1</sup>H-NMR of 66

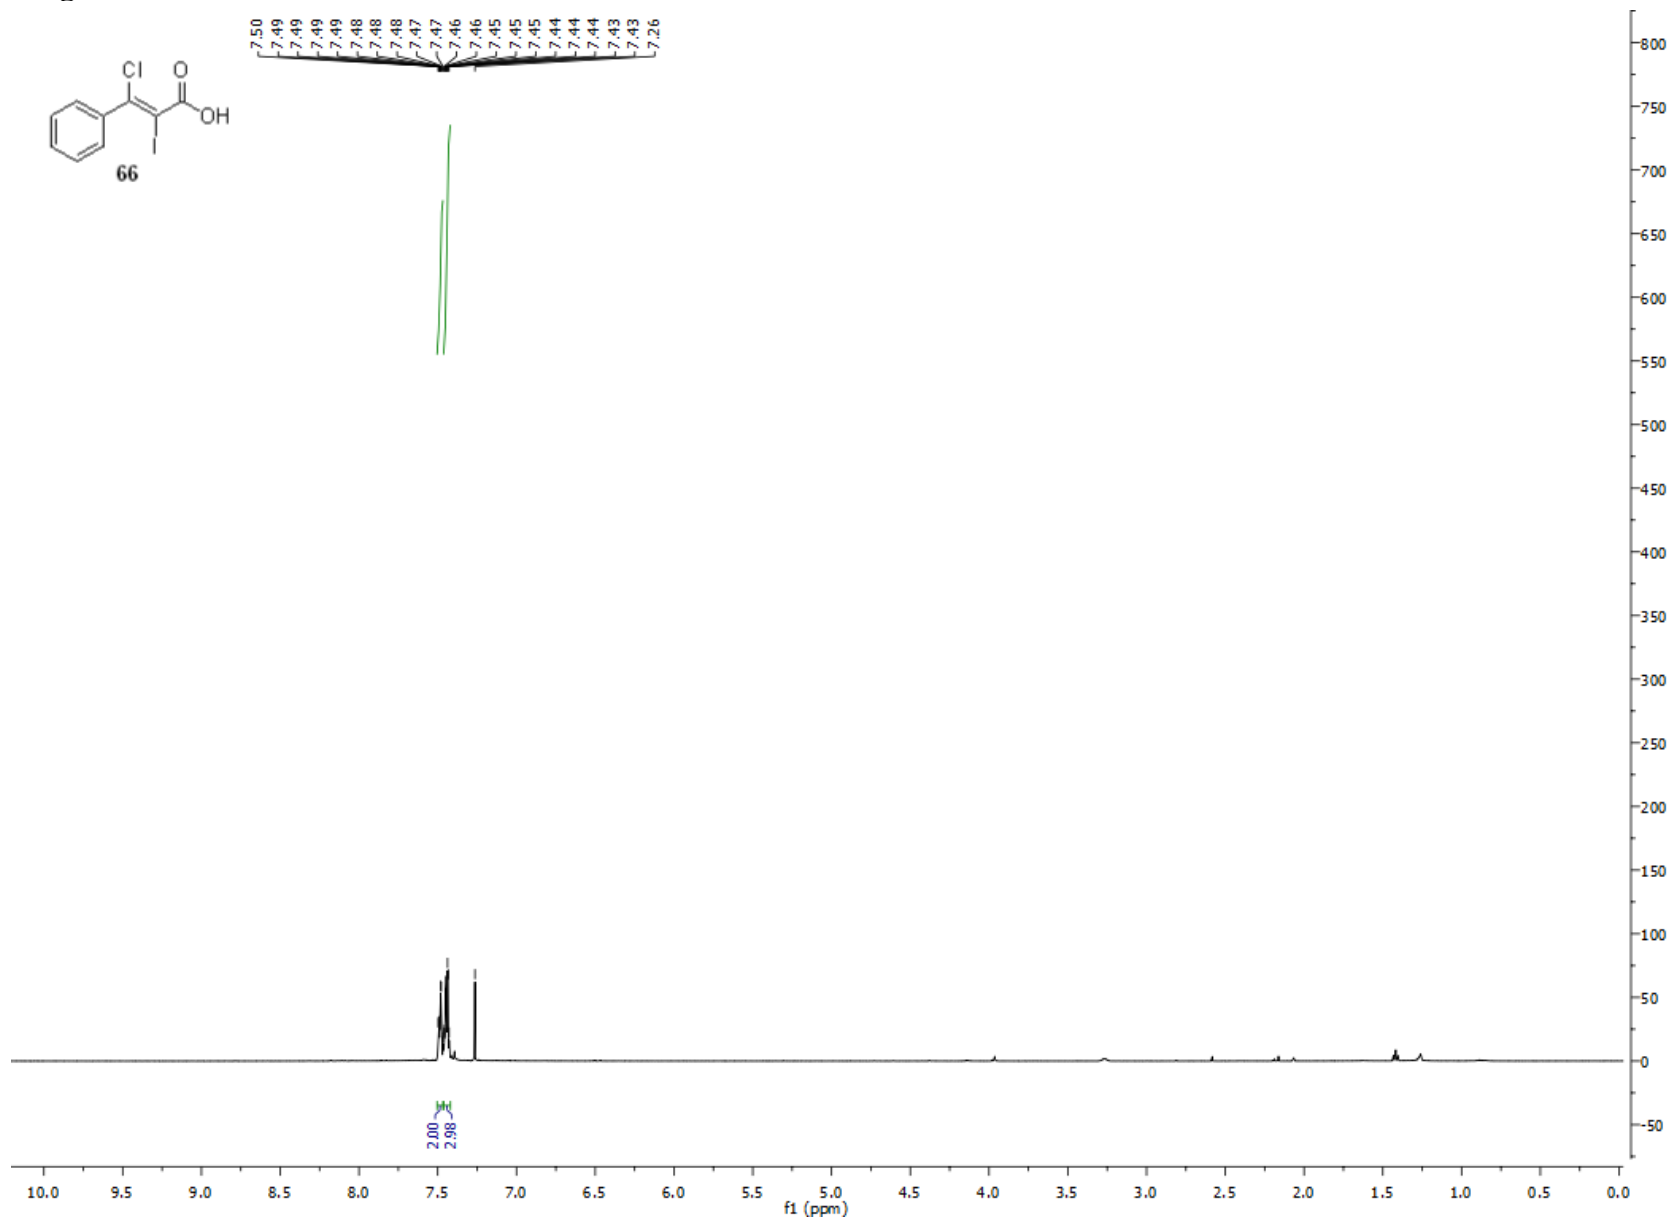

Figure S151.  $^{13}\text{C}$ -NMR of **66**

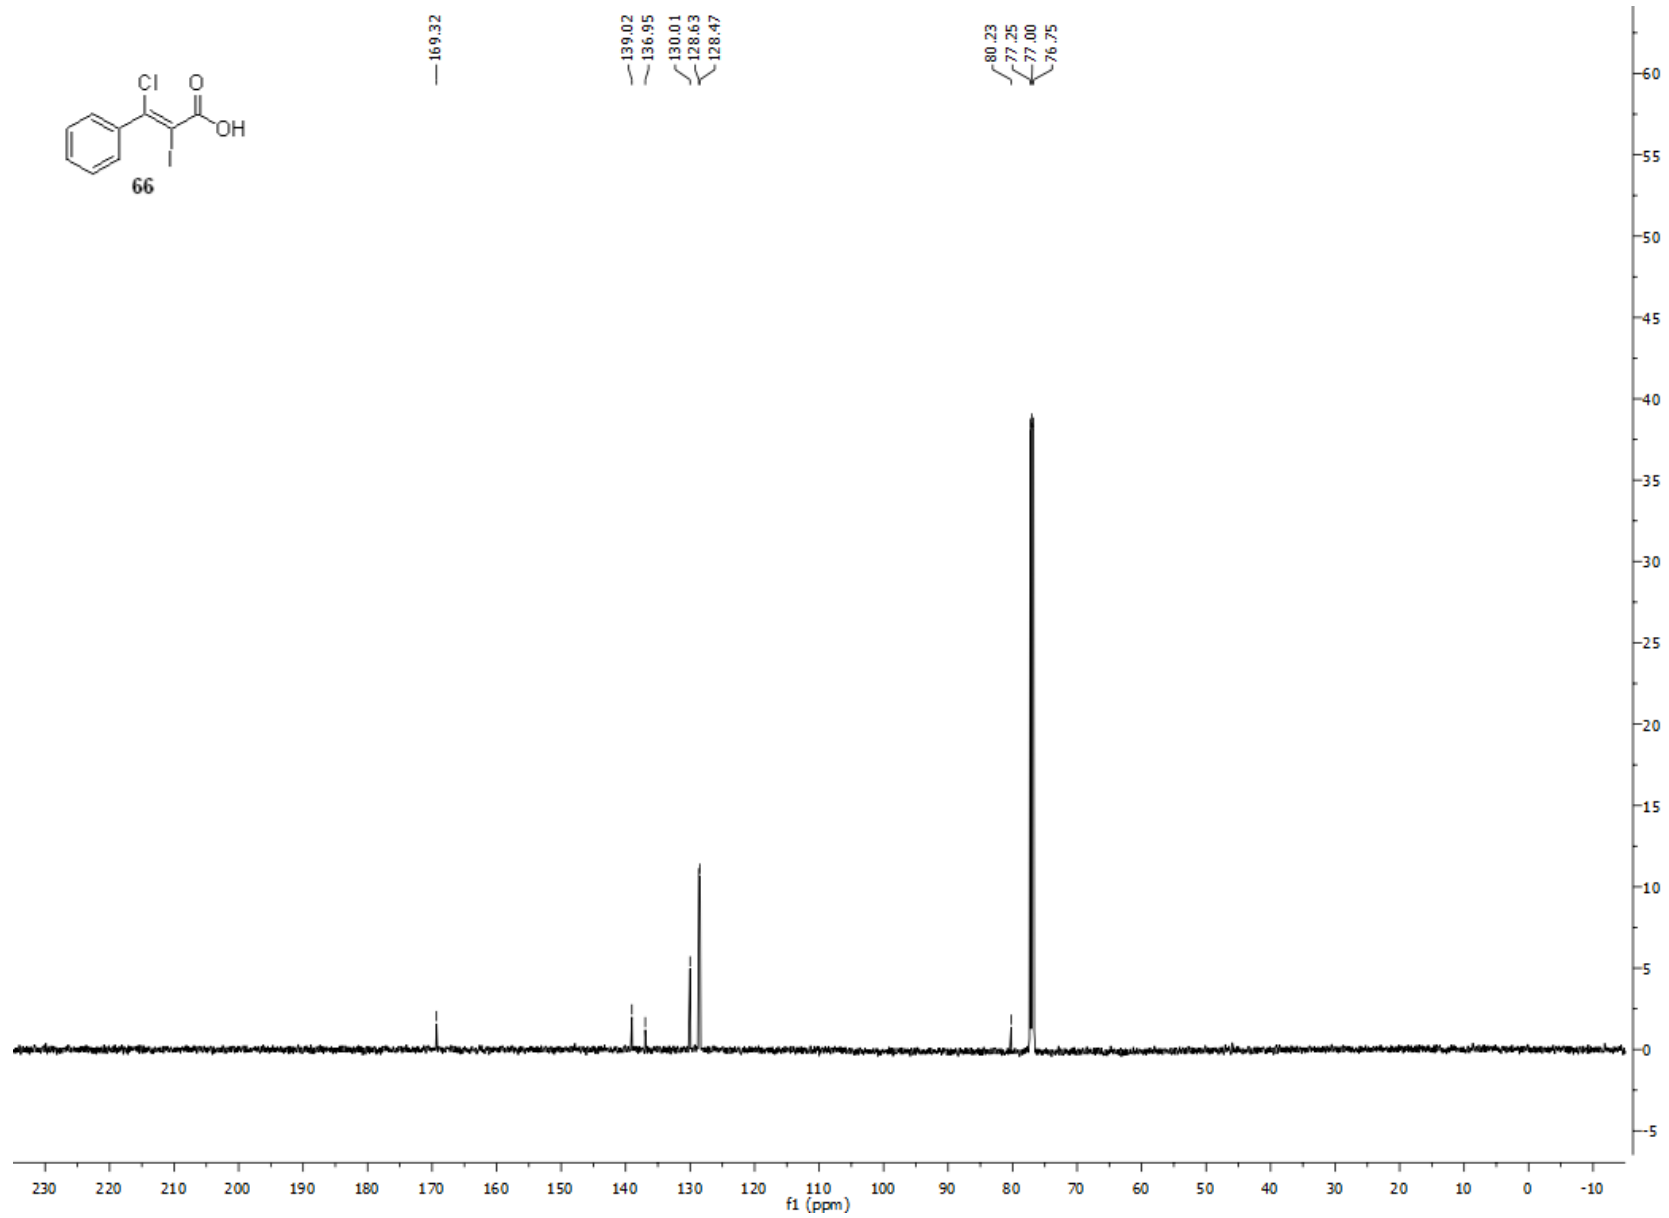

Figure S152. <sup>1</sup>H-NMR of 67

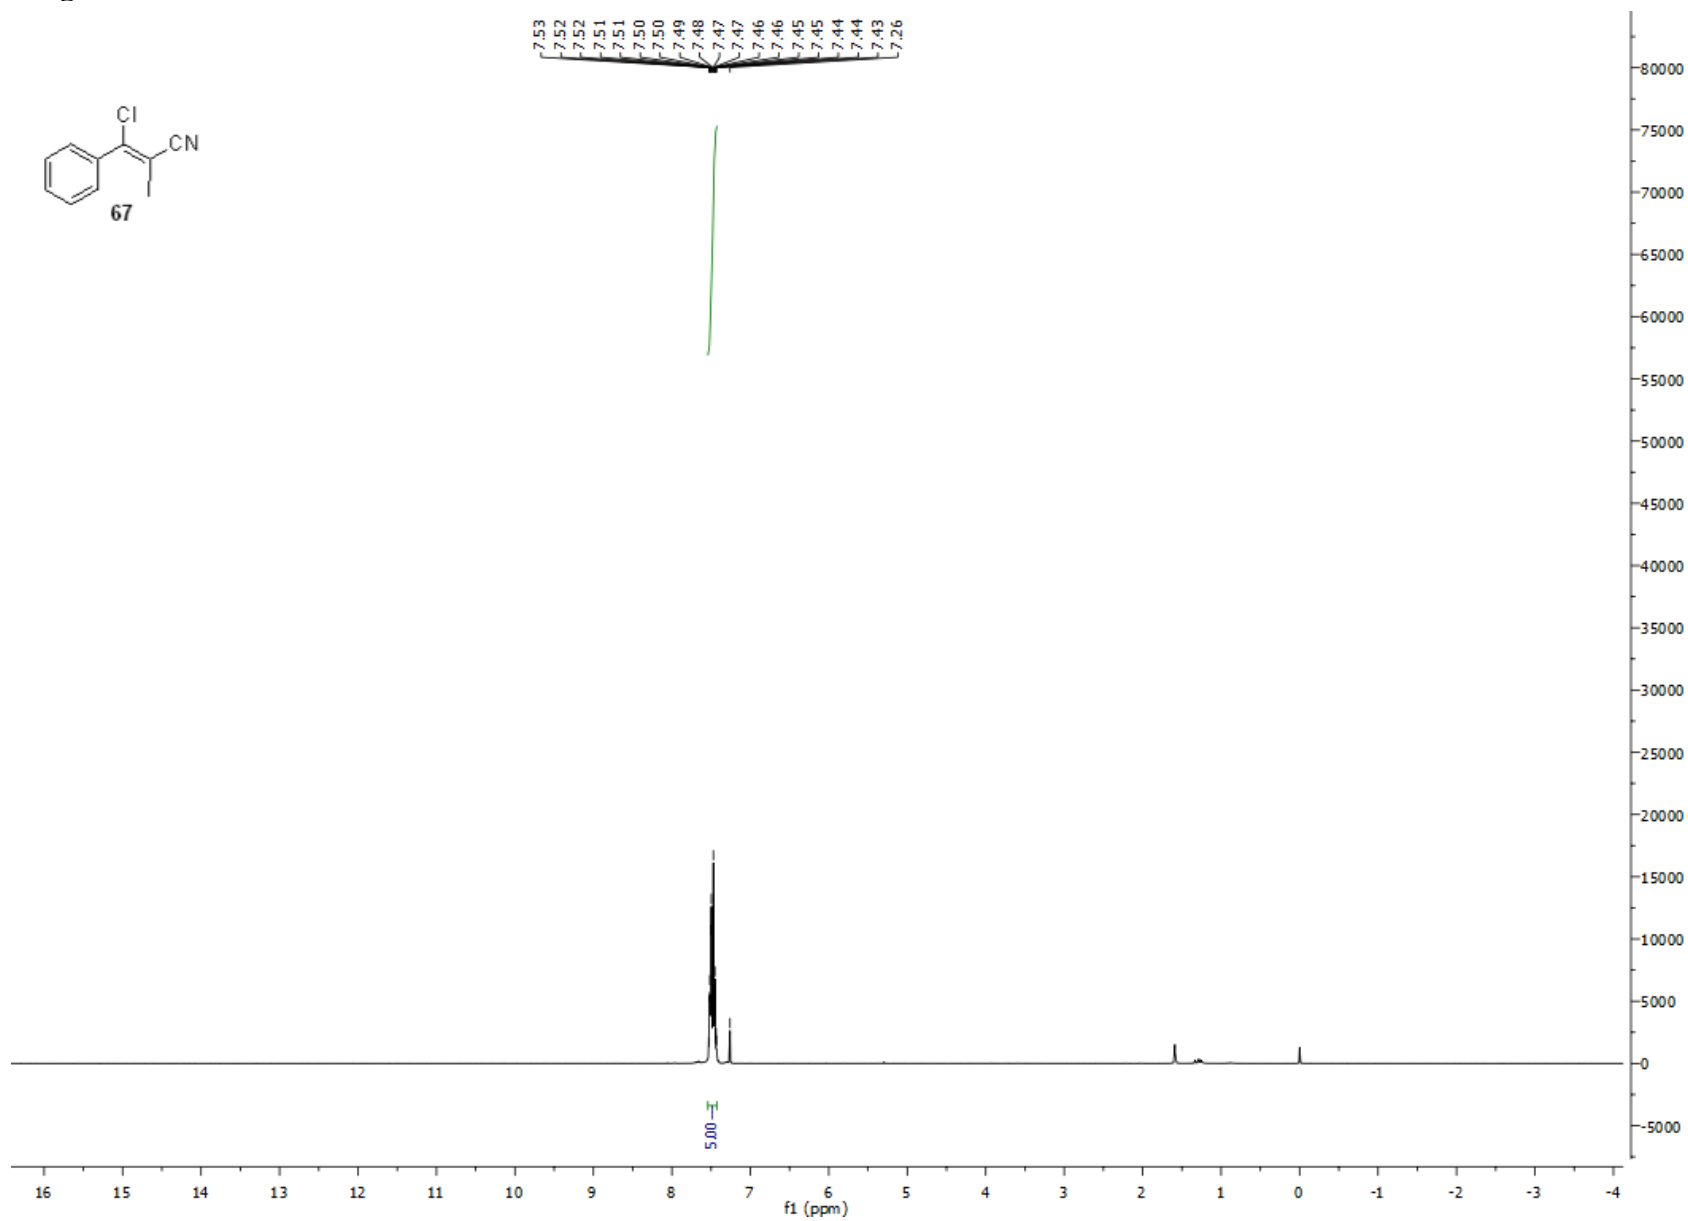

Figure S153.  $^{13}\text{C}$ -NMR of 67

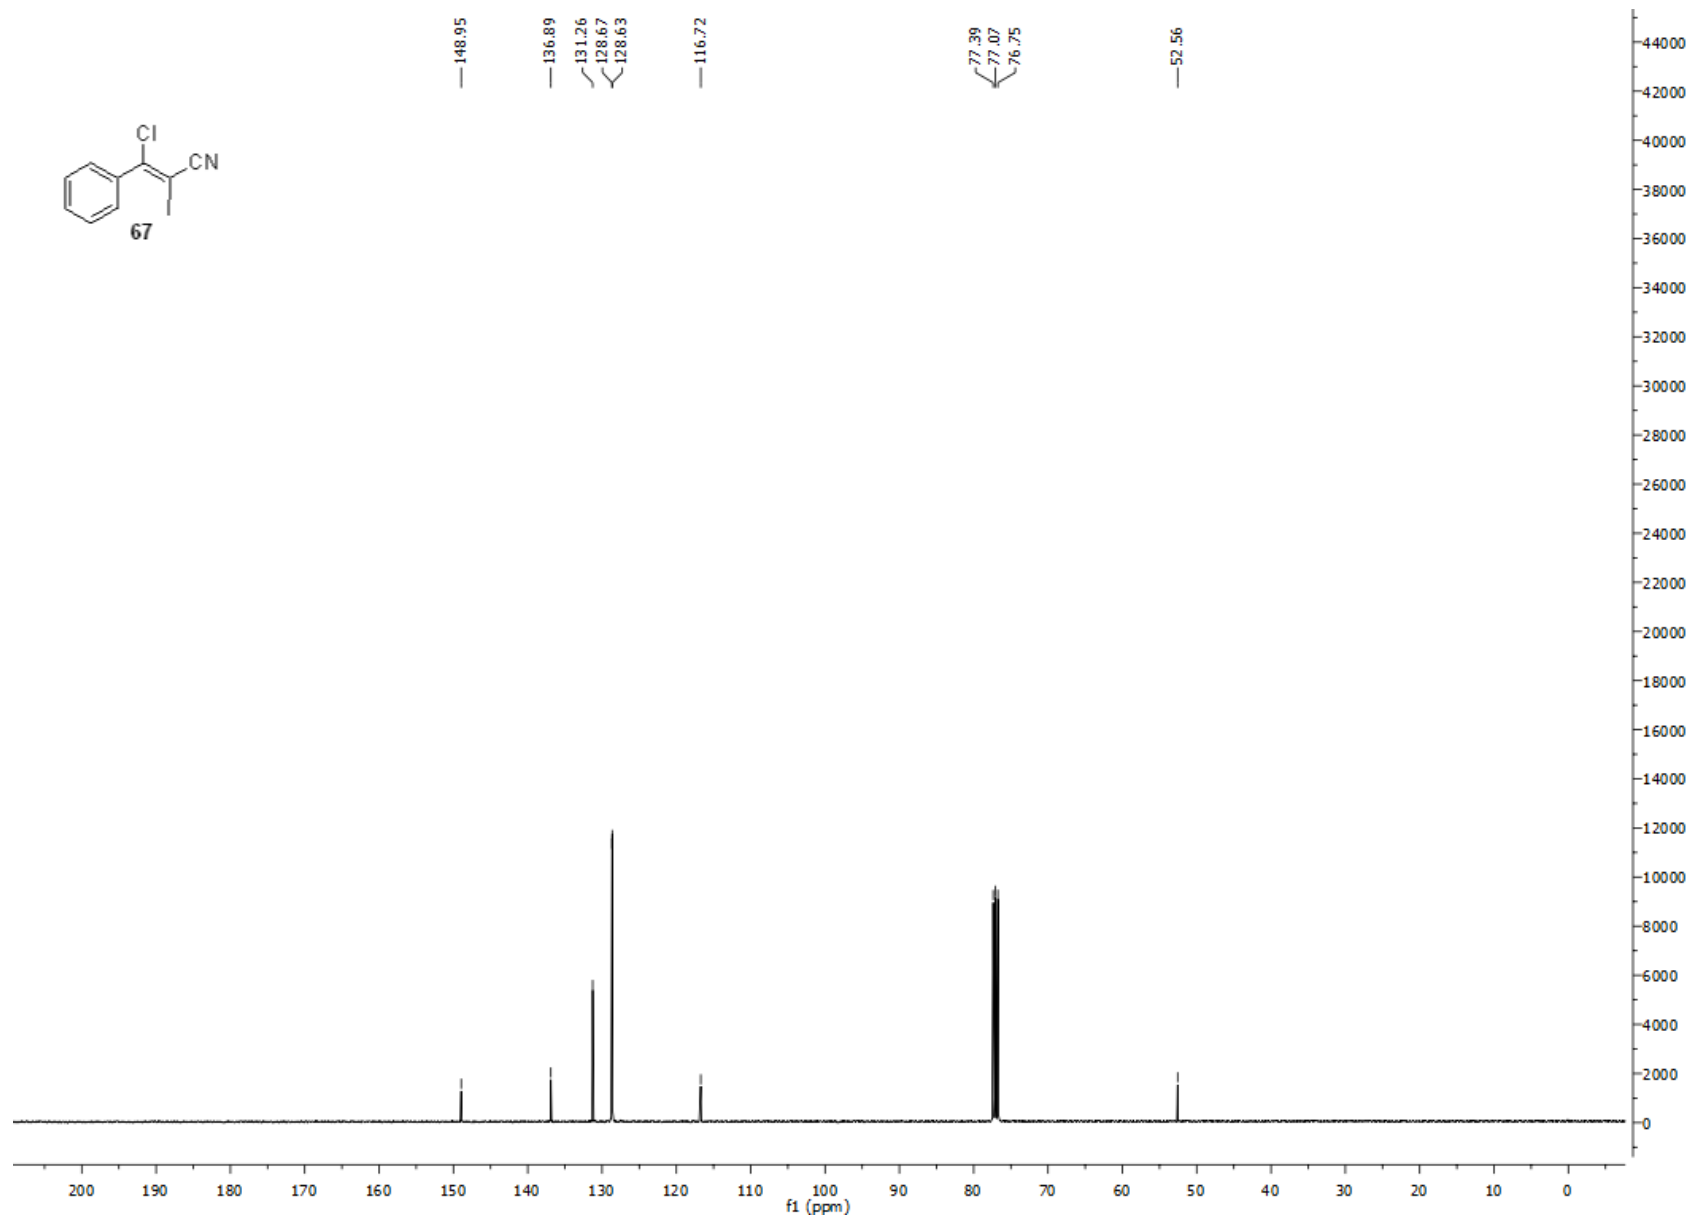

Figure S154. <sup>1</sup>H-NMR of 68

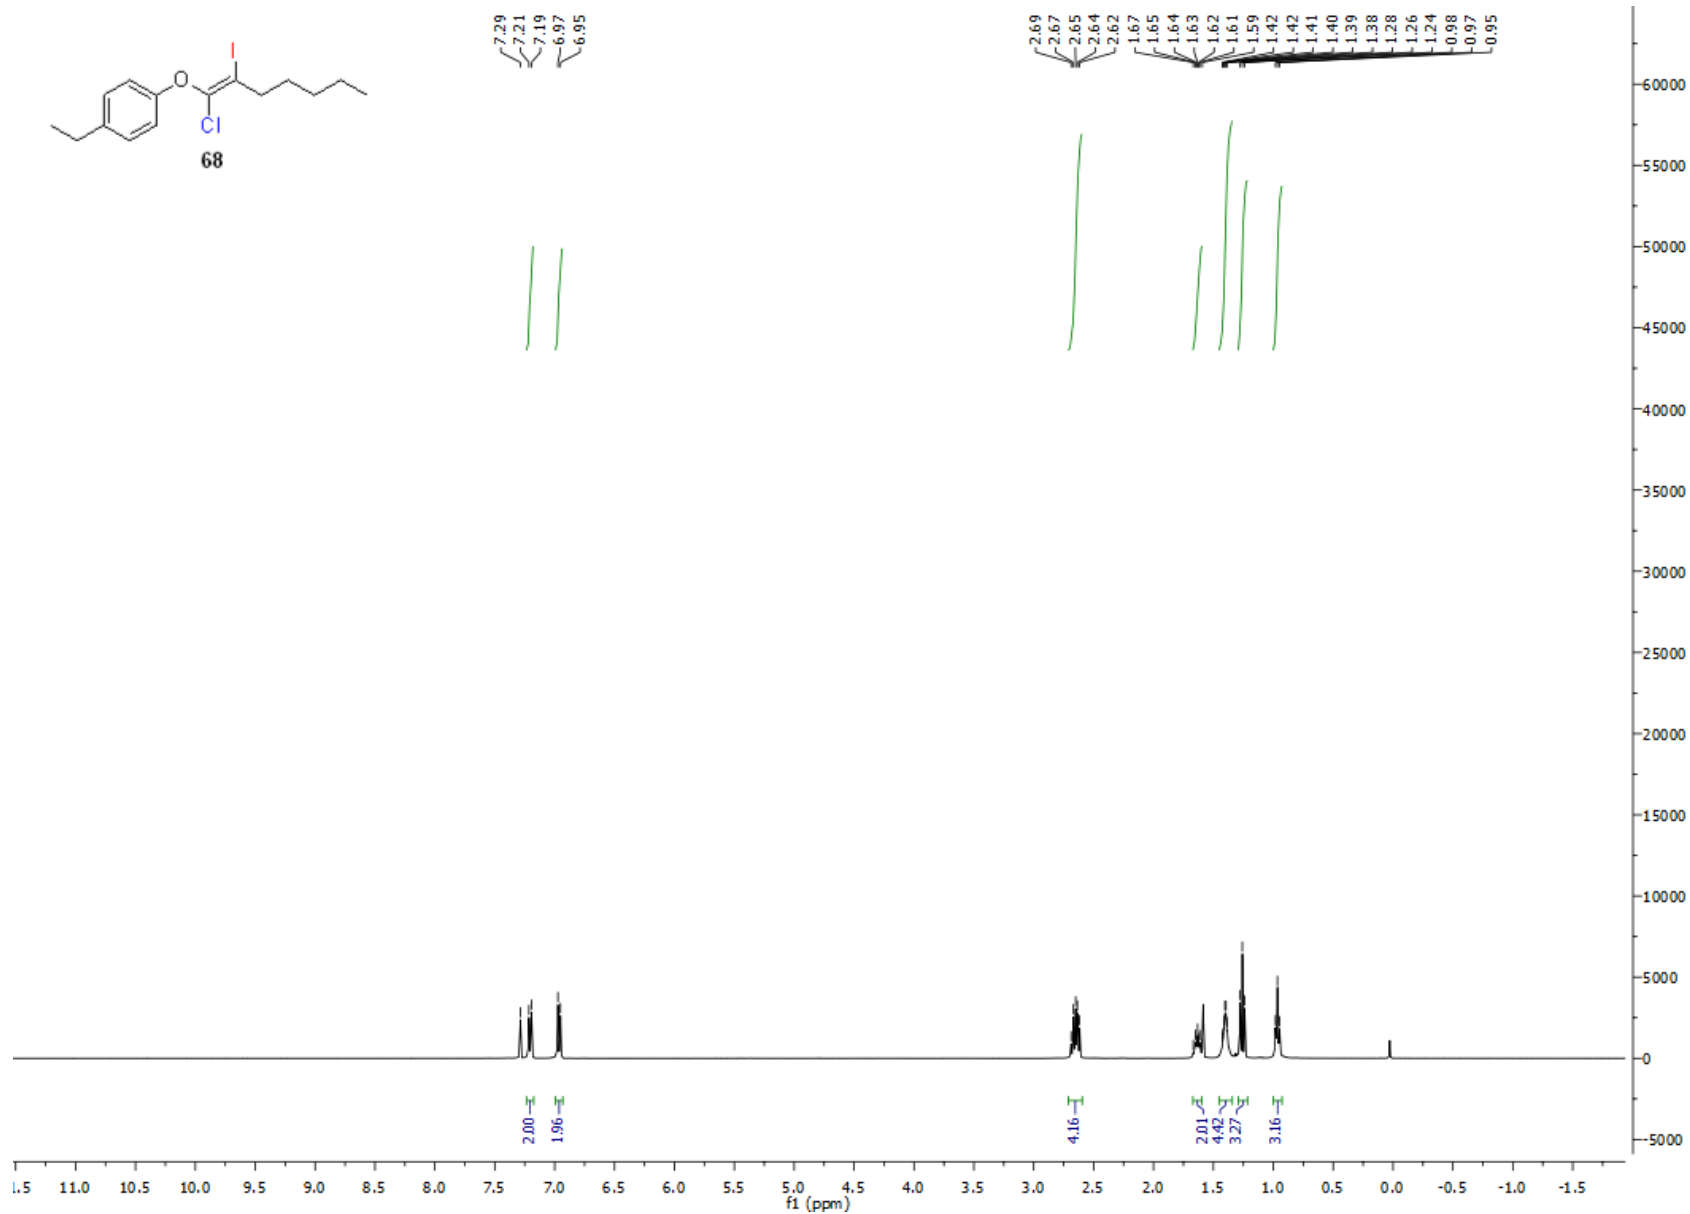



Figure S155.  $^{13}\text{C}$ -NMR of **68**

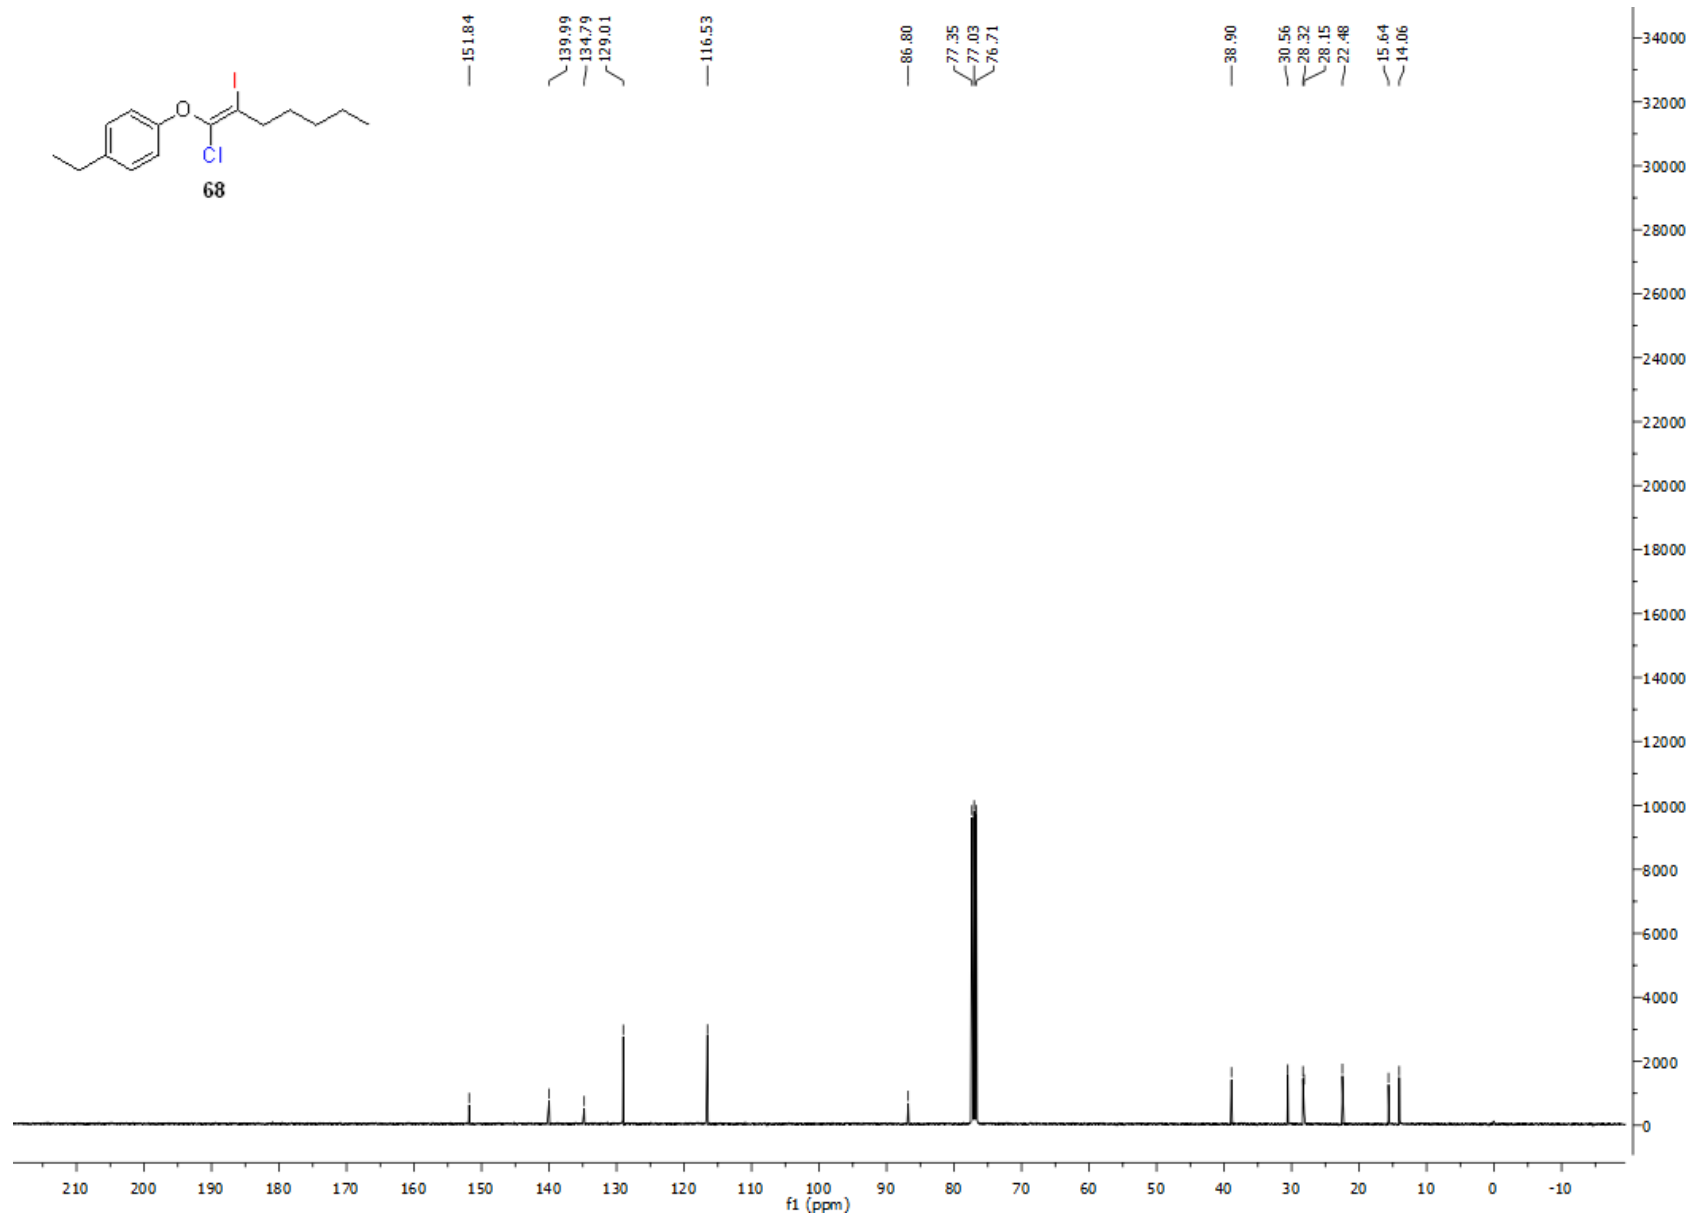

Figure S156. <sup>1</sup>H-NMR of 69

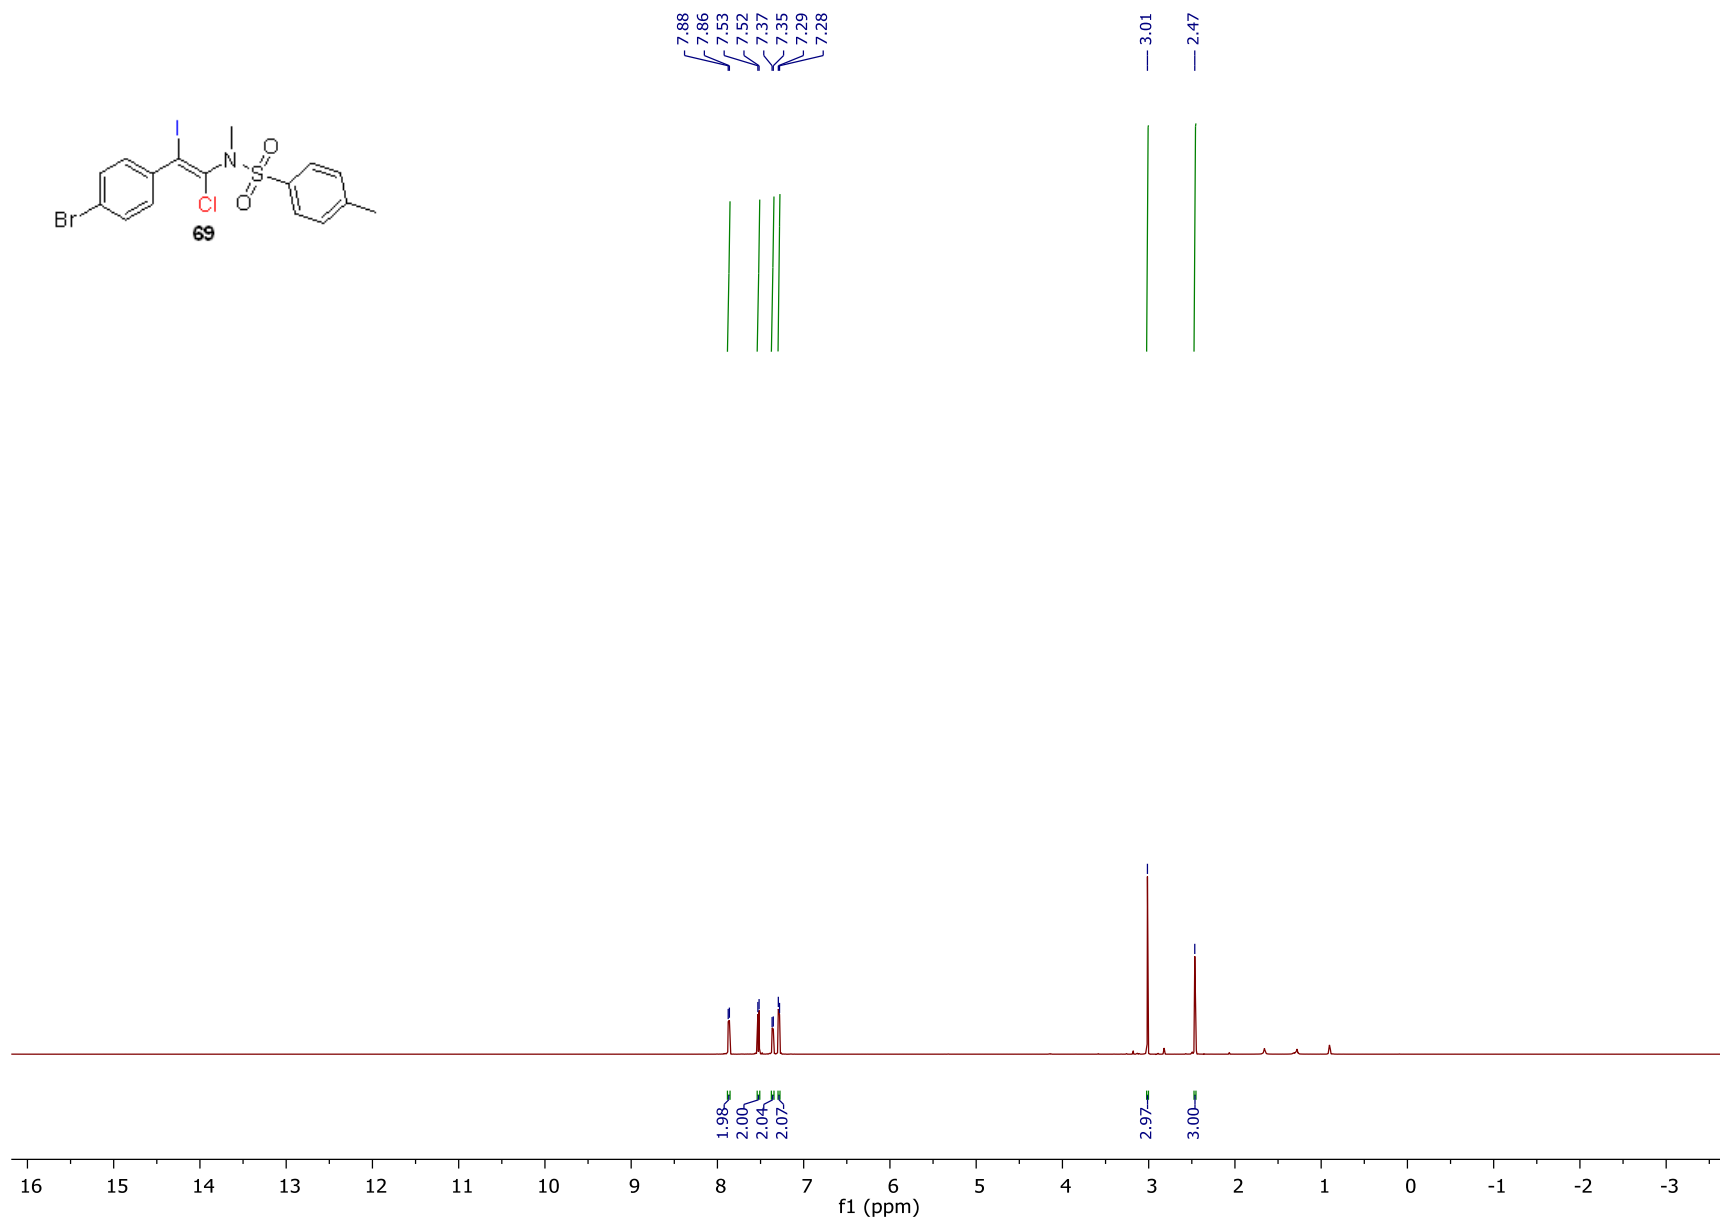

Figure S157.  $^{13}\text{C}$ -NMR of **69**

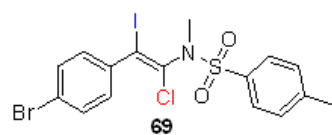

144.67  
139.67  
134.41  
131.62  
130.37  
129.63  
129.57  
128.77  
123.18

99.21

77.26  
77.05  
76.84

35.12

21.68

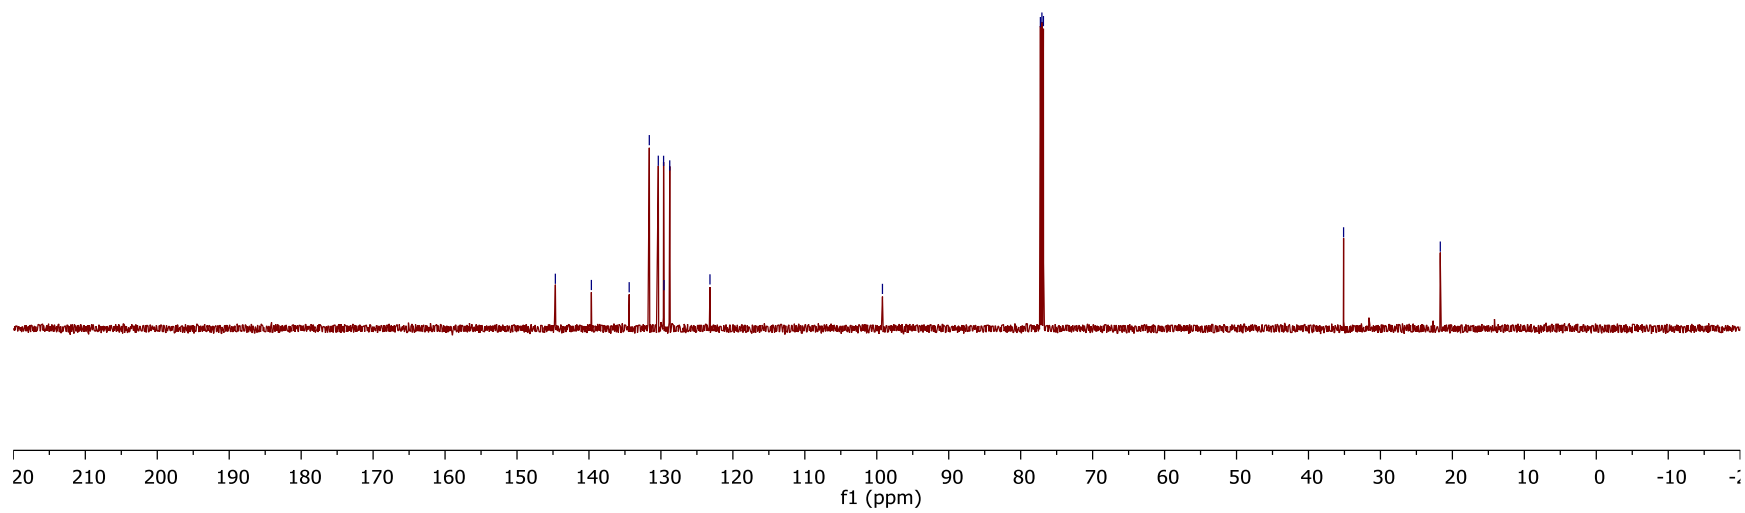

Figure S158. <sup>1</sup>H-NMR of 70

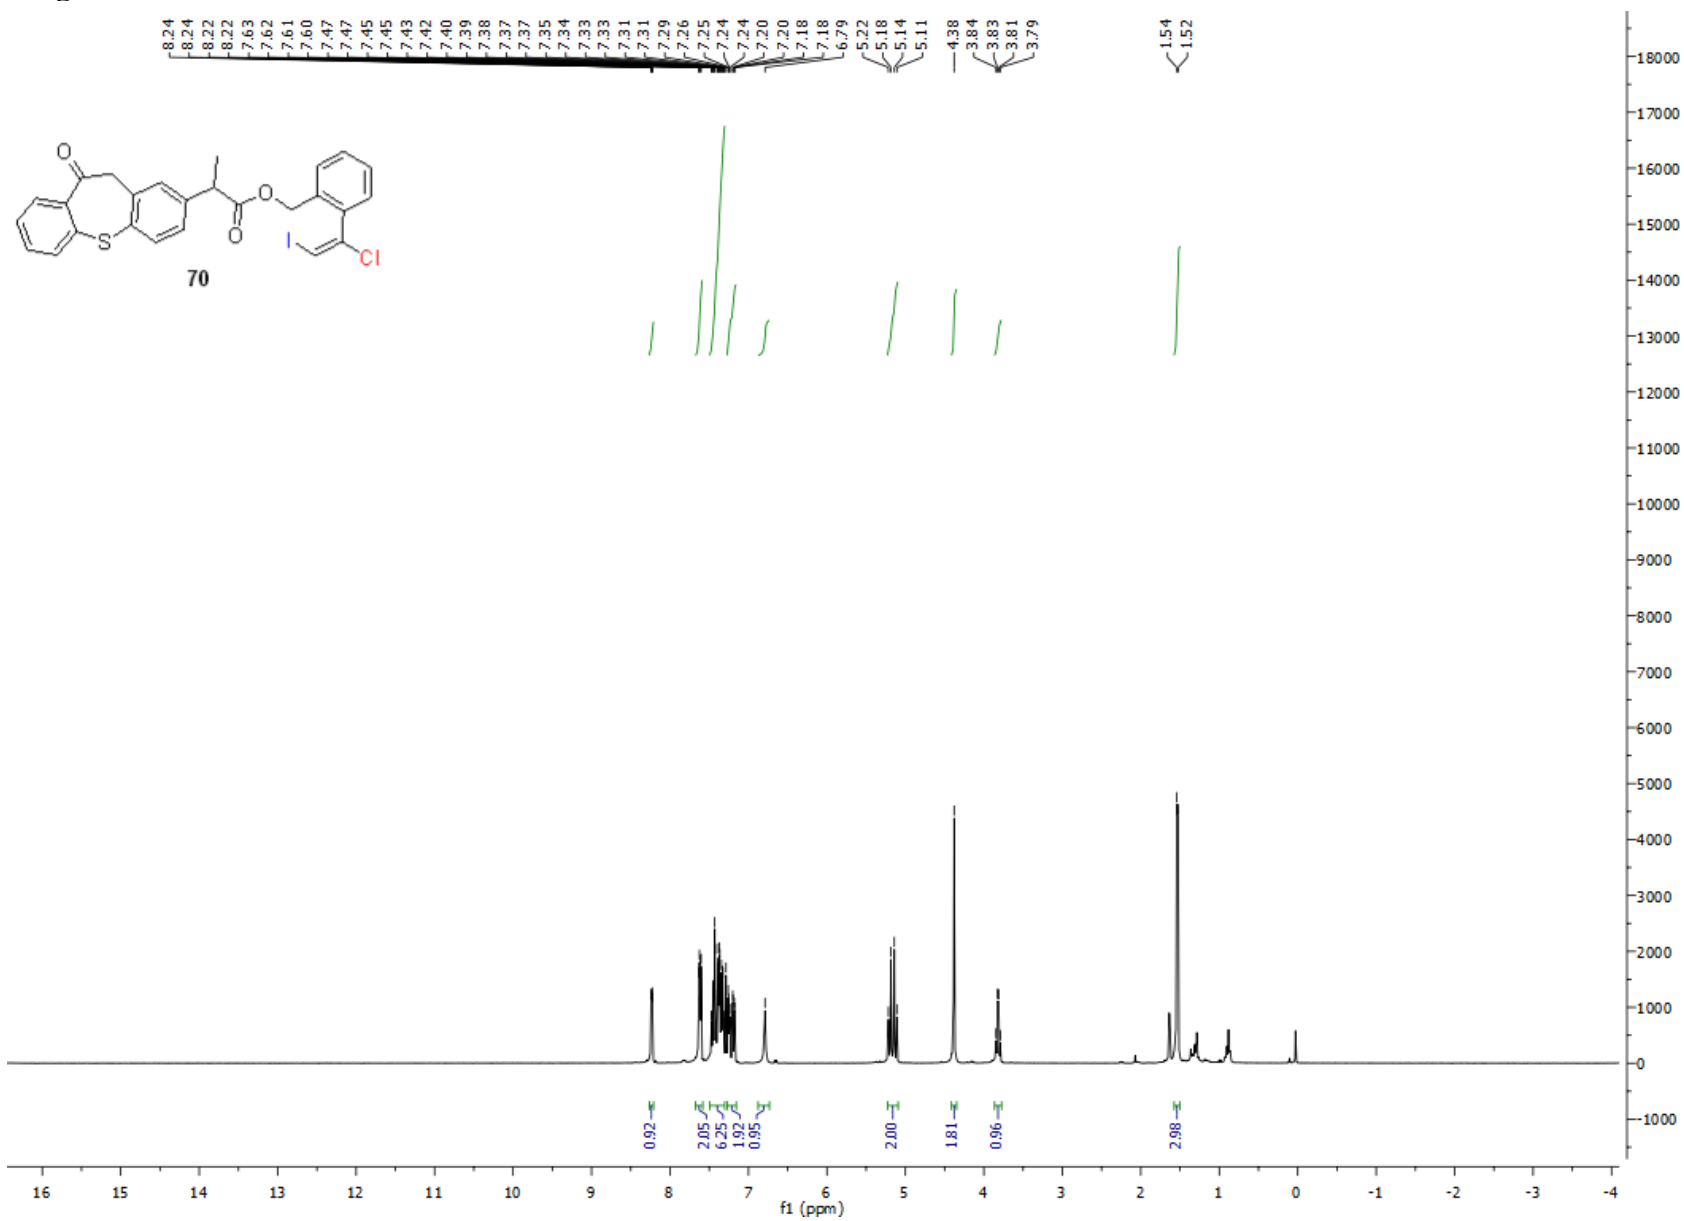

Figure S159.  $^{13}\text{C}$ -NMR of 70

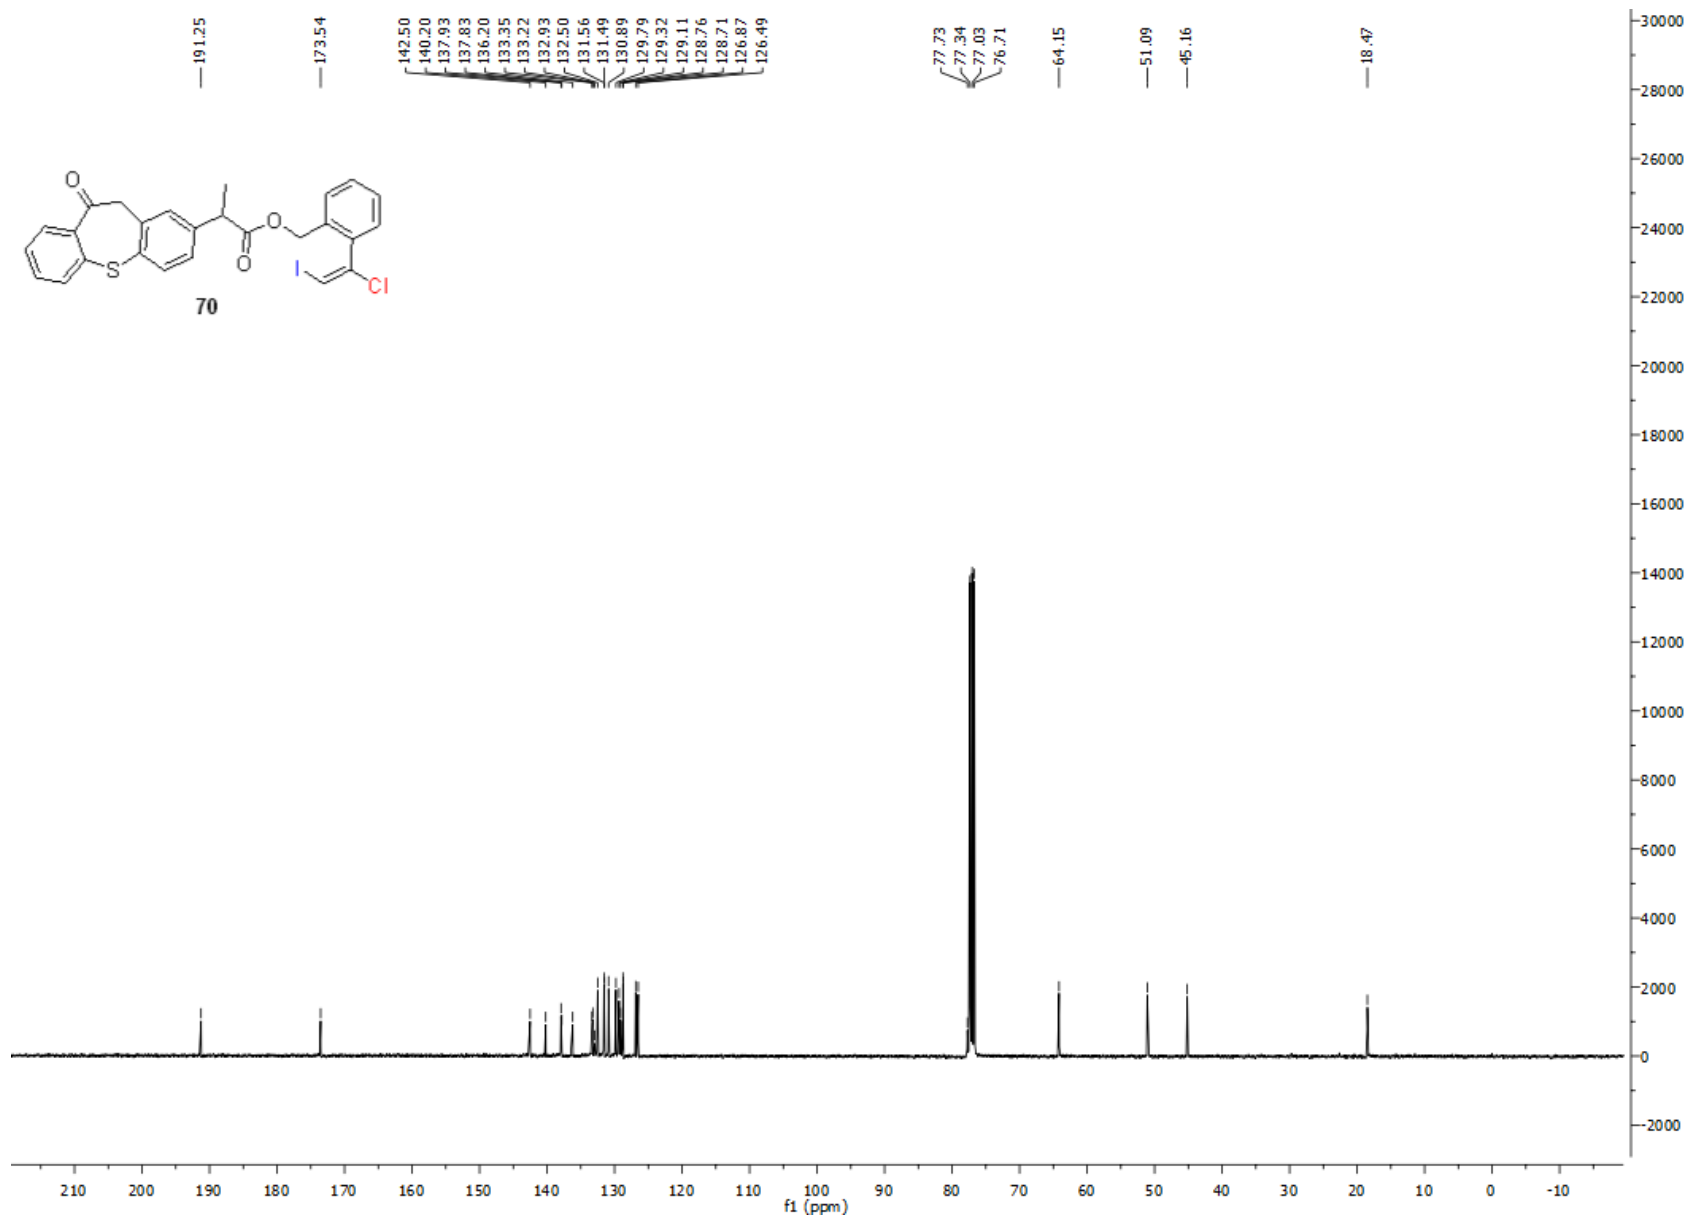

**Figure S160.**  $^1\text{H-NMR}$  of **71**

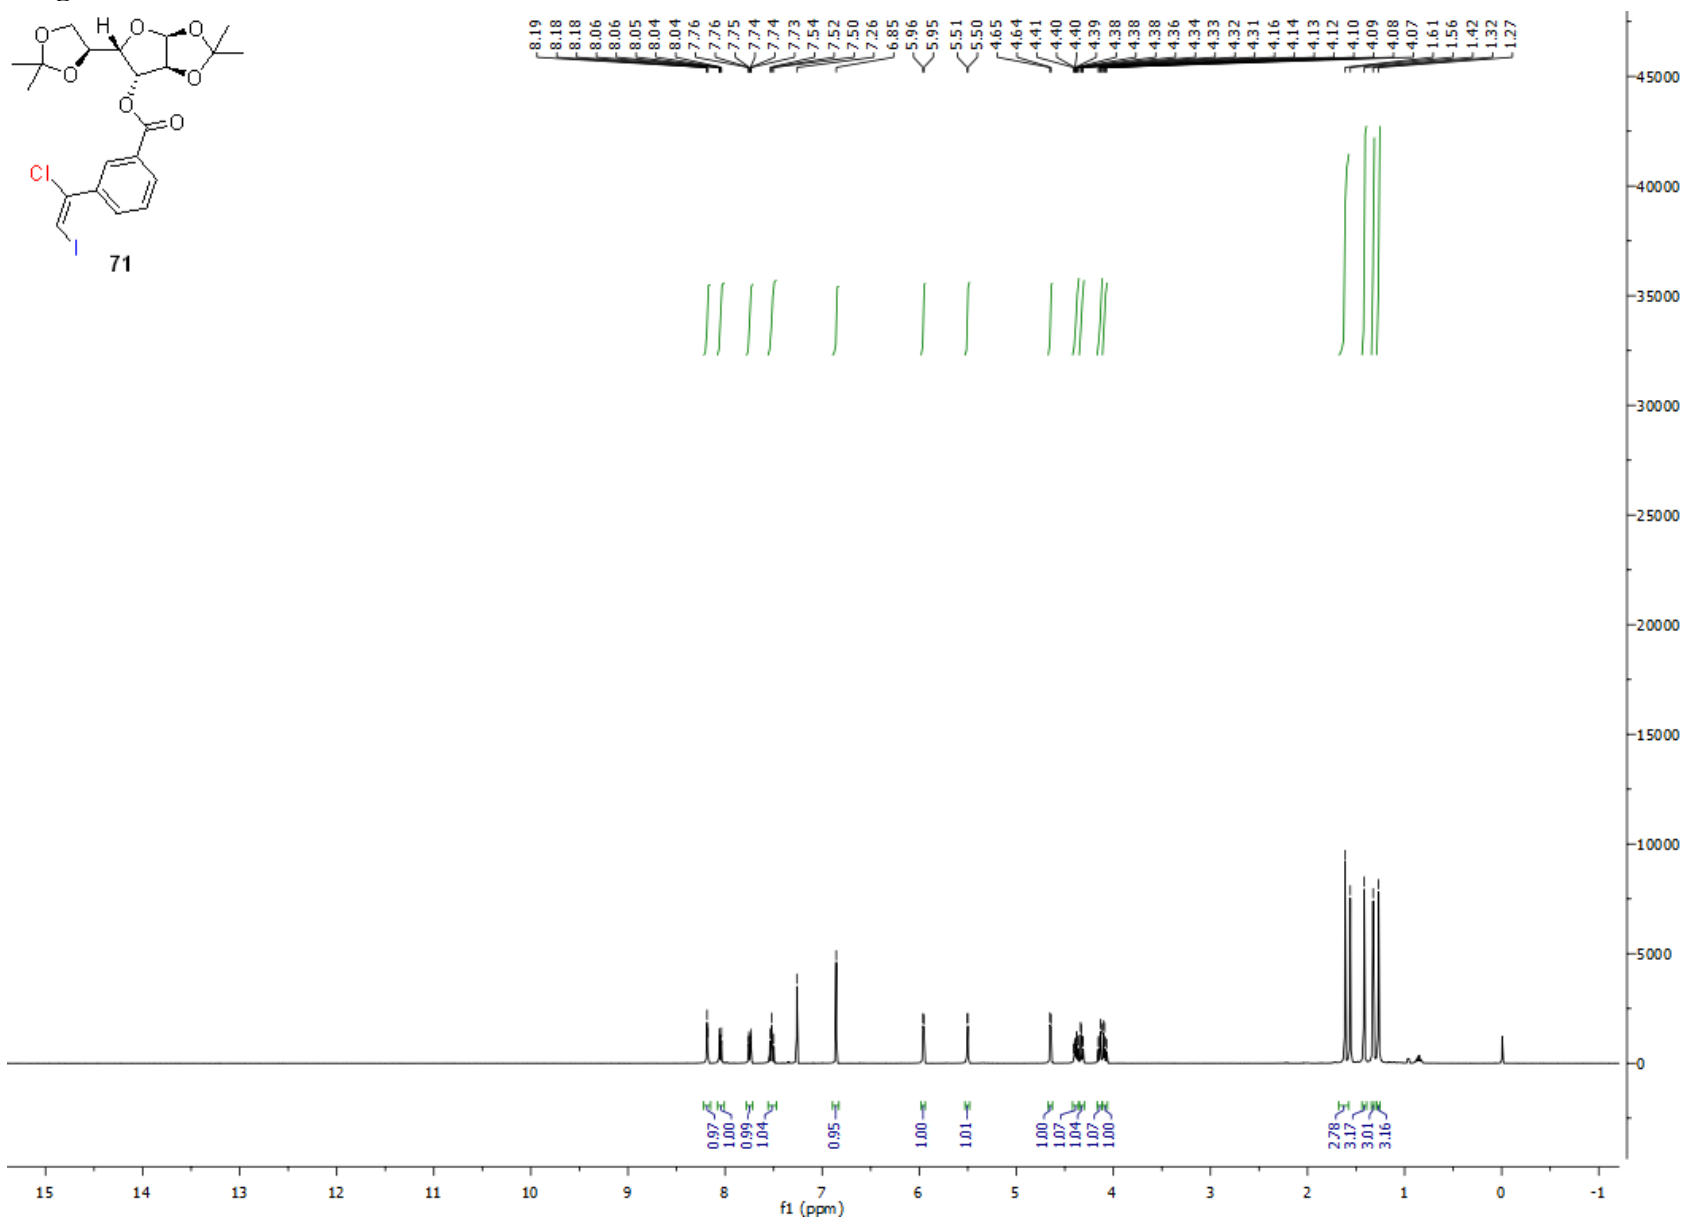

Figure S161. <sup>13</sup>C-NMR of 71

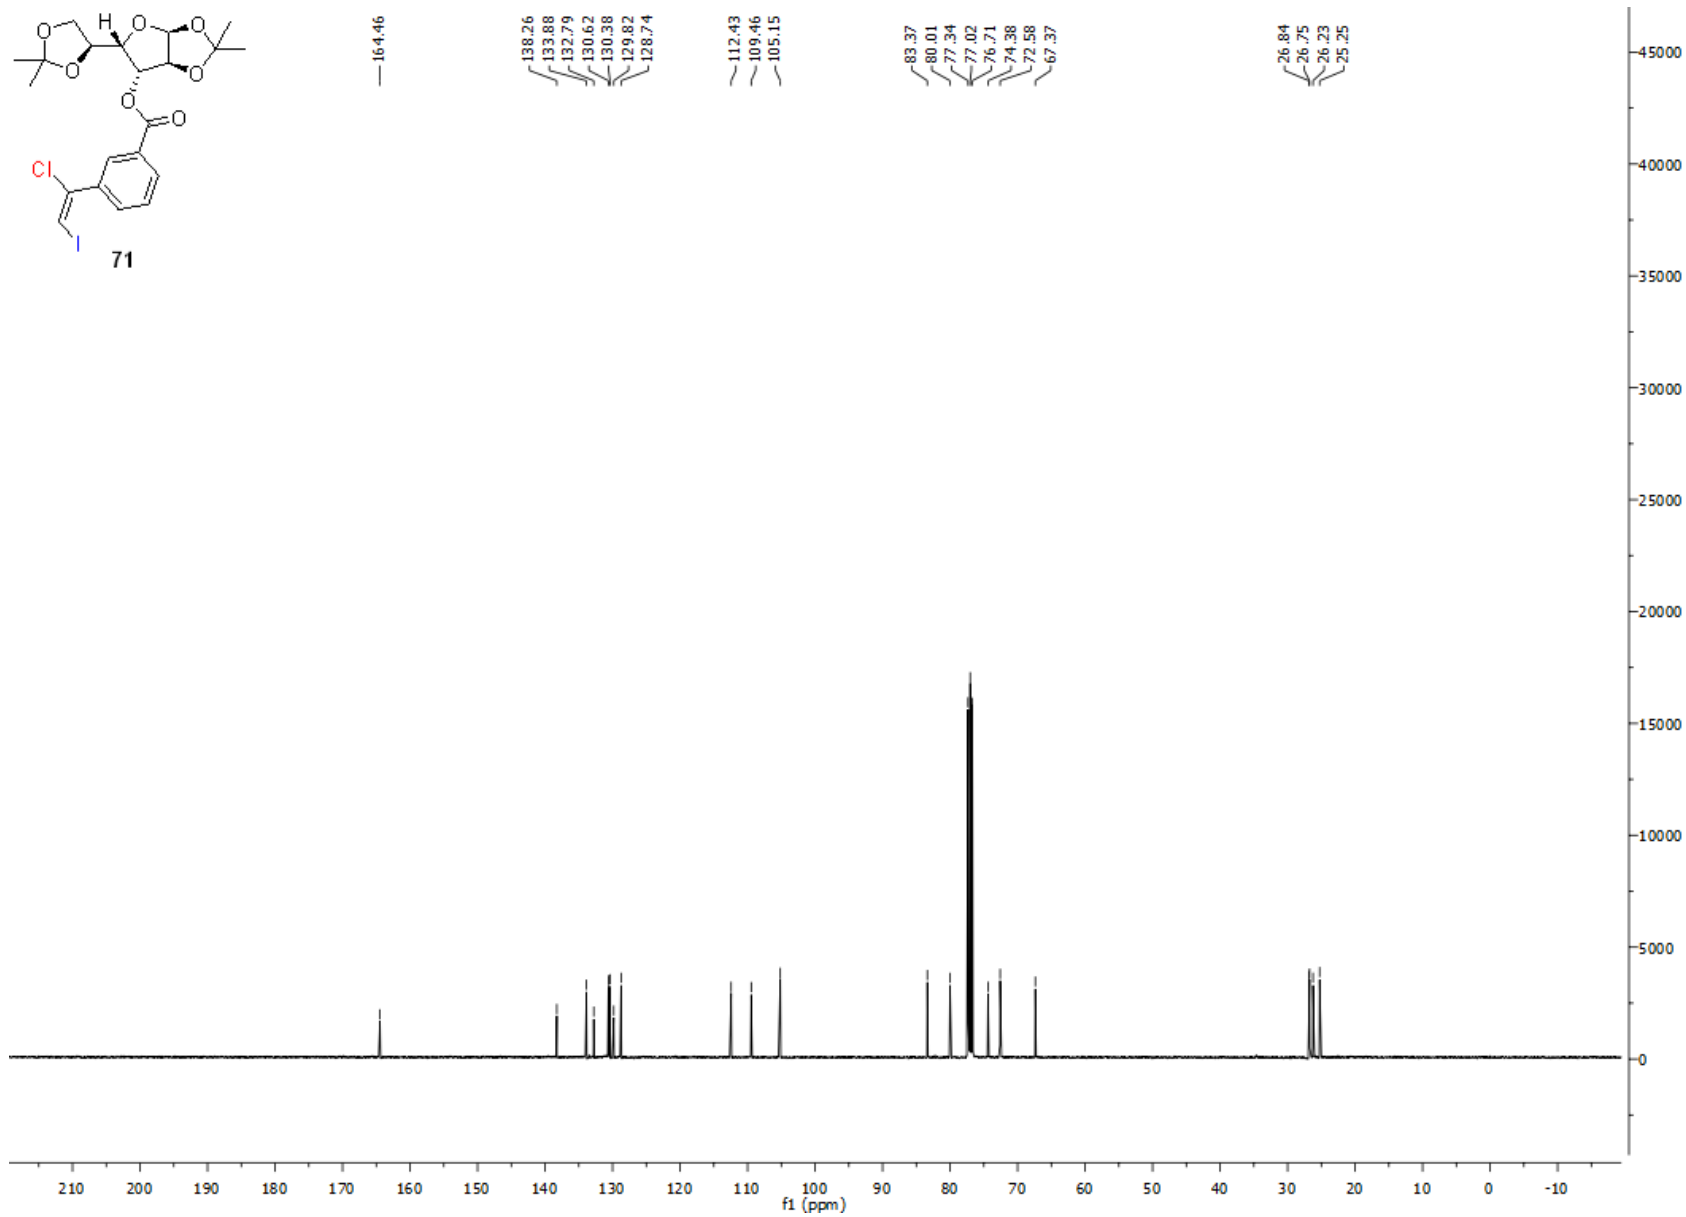

Figure S162. <sup>1</sup>H-NMR of 72

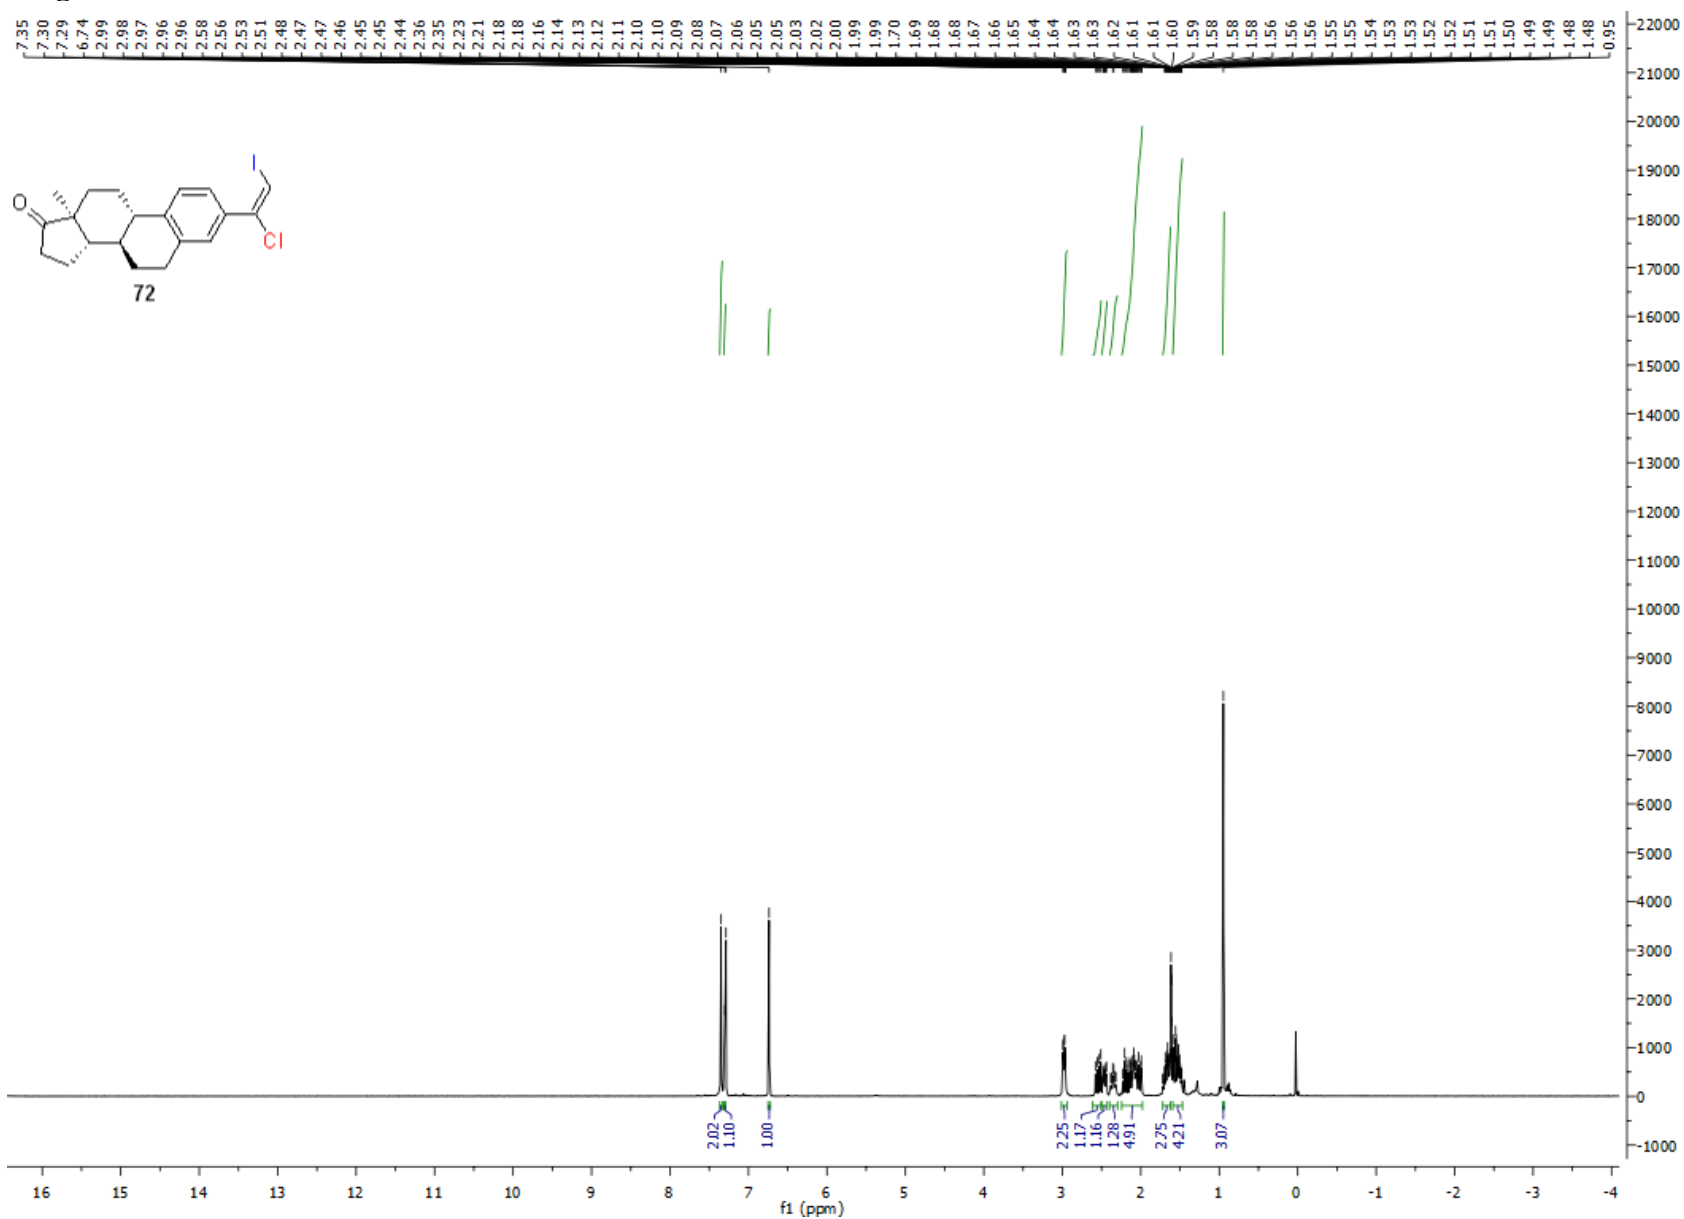



Figure S163.  $^{13}\text{C}$ -NMR of 72

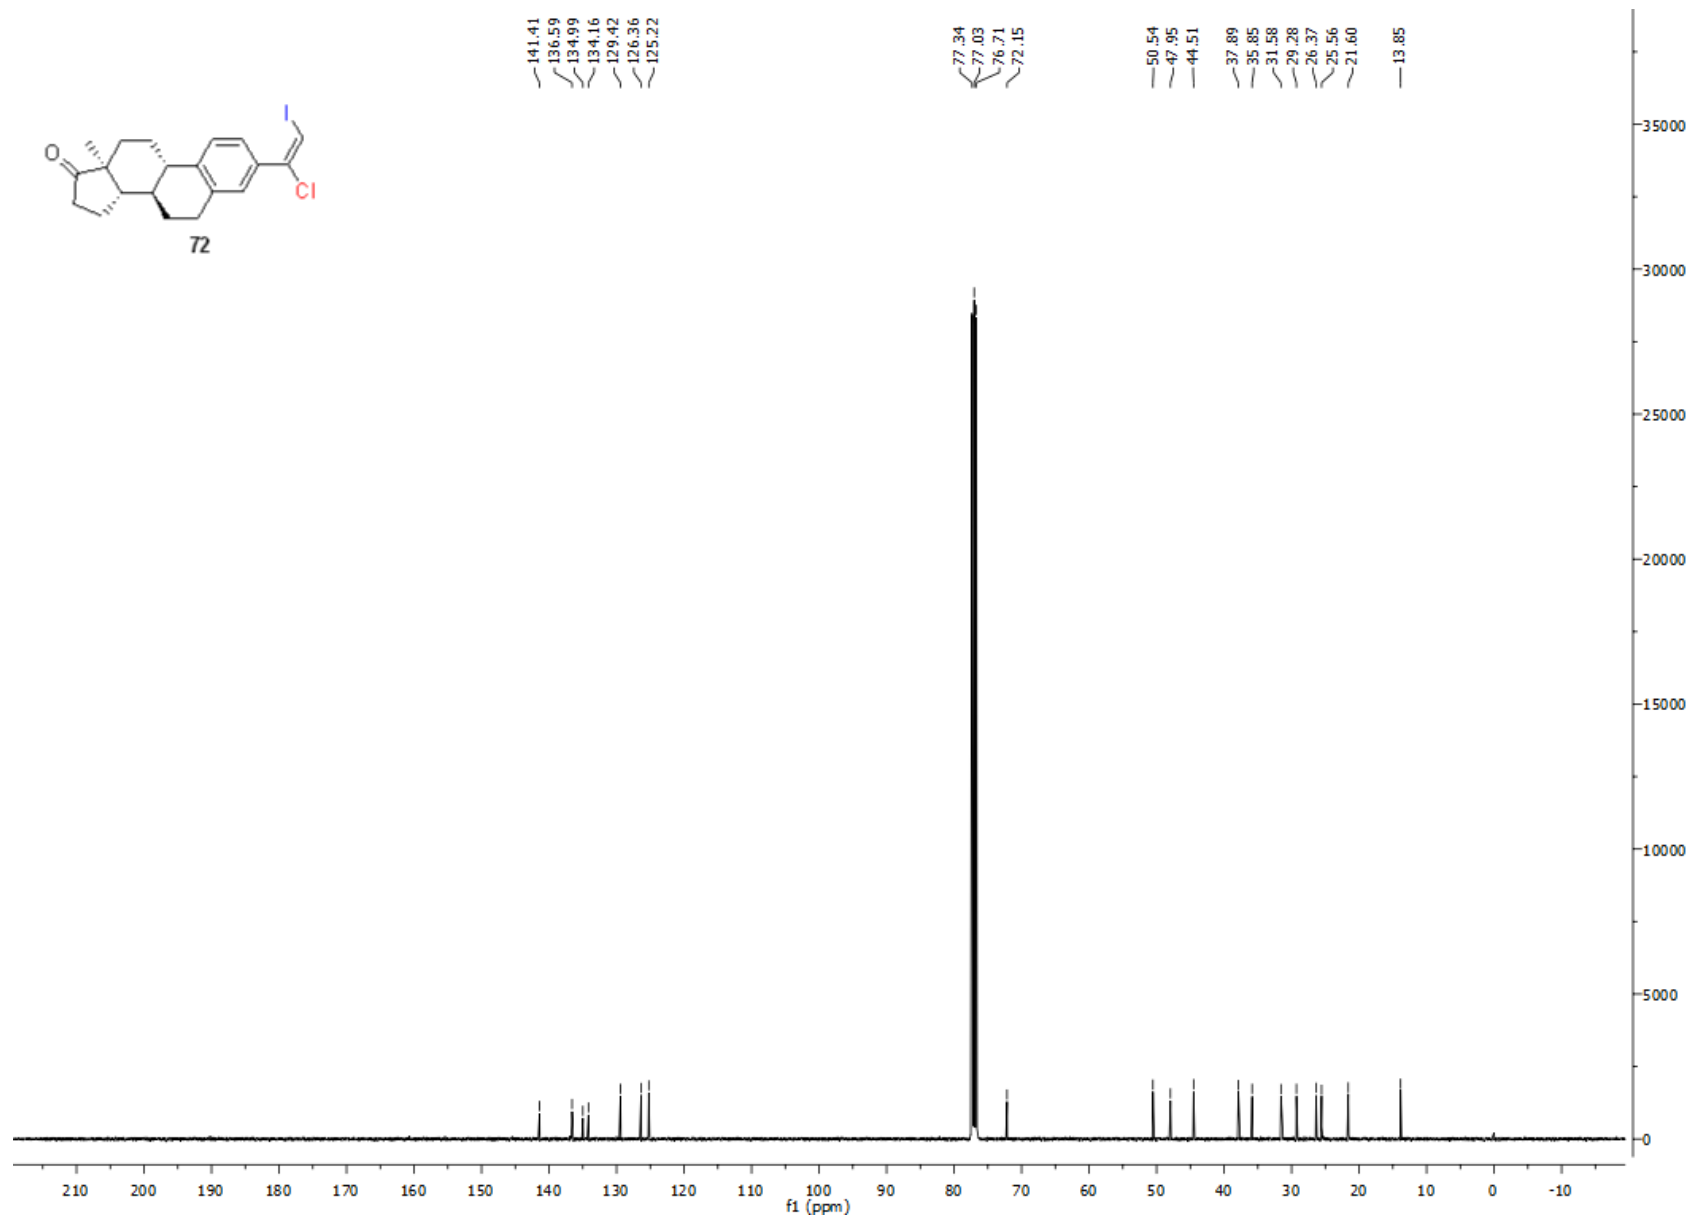

Figure S164. <sup>1</sup>H-NMR of 73

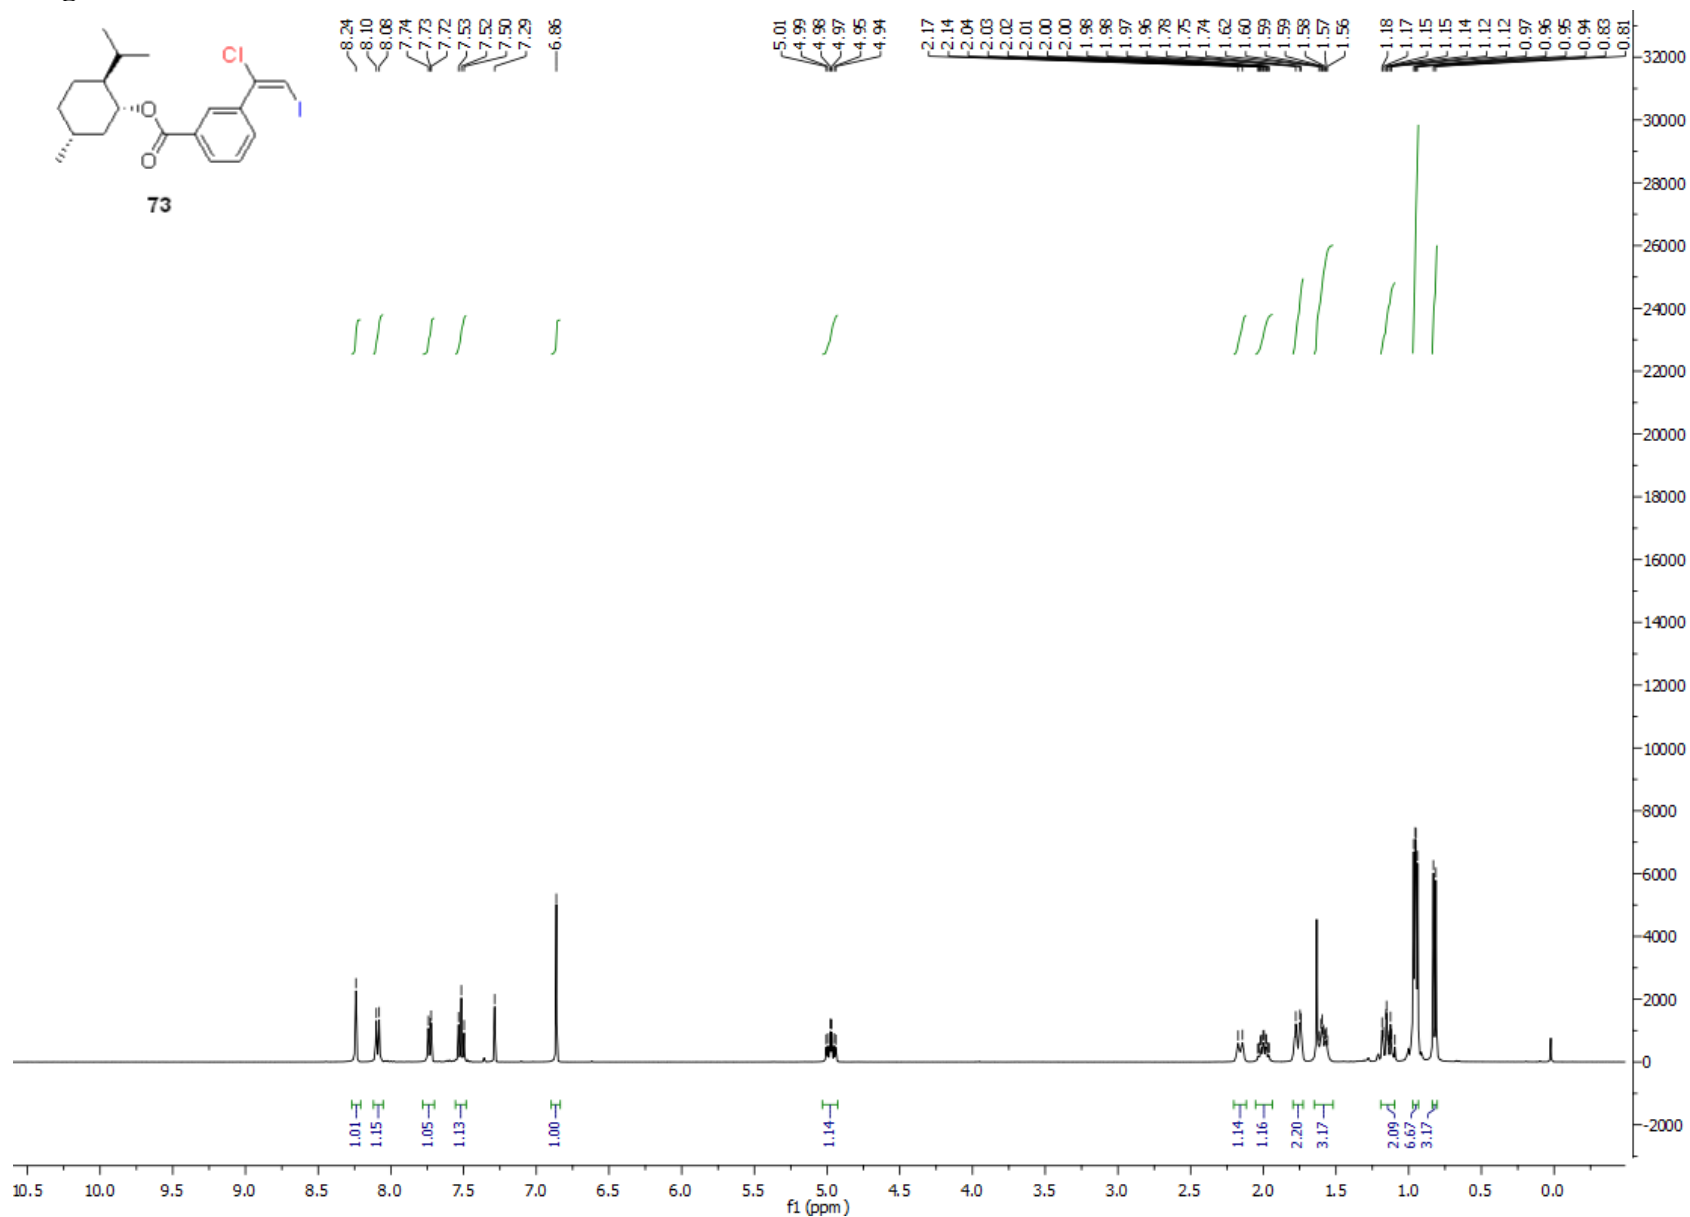

Figure S165.  $^{13}\text{C}$ -NMR of

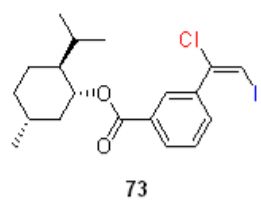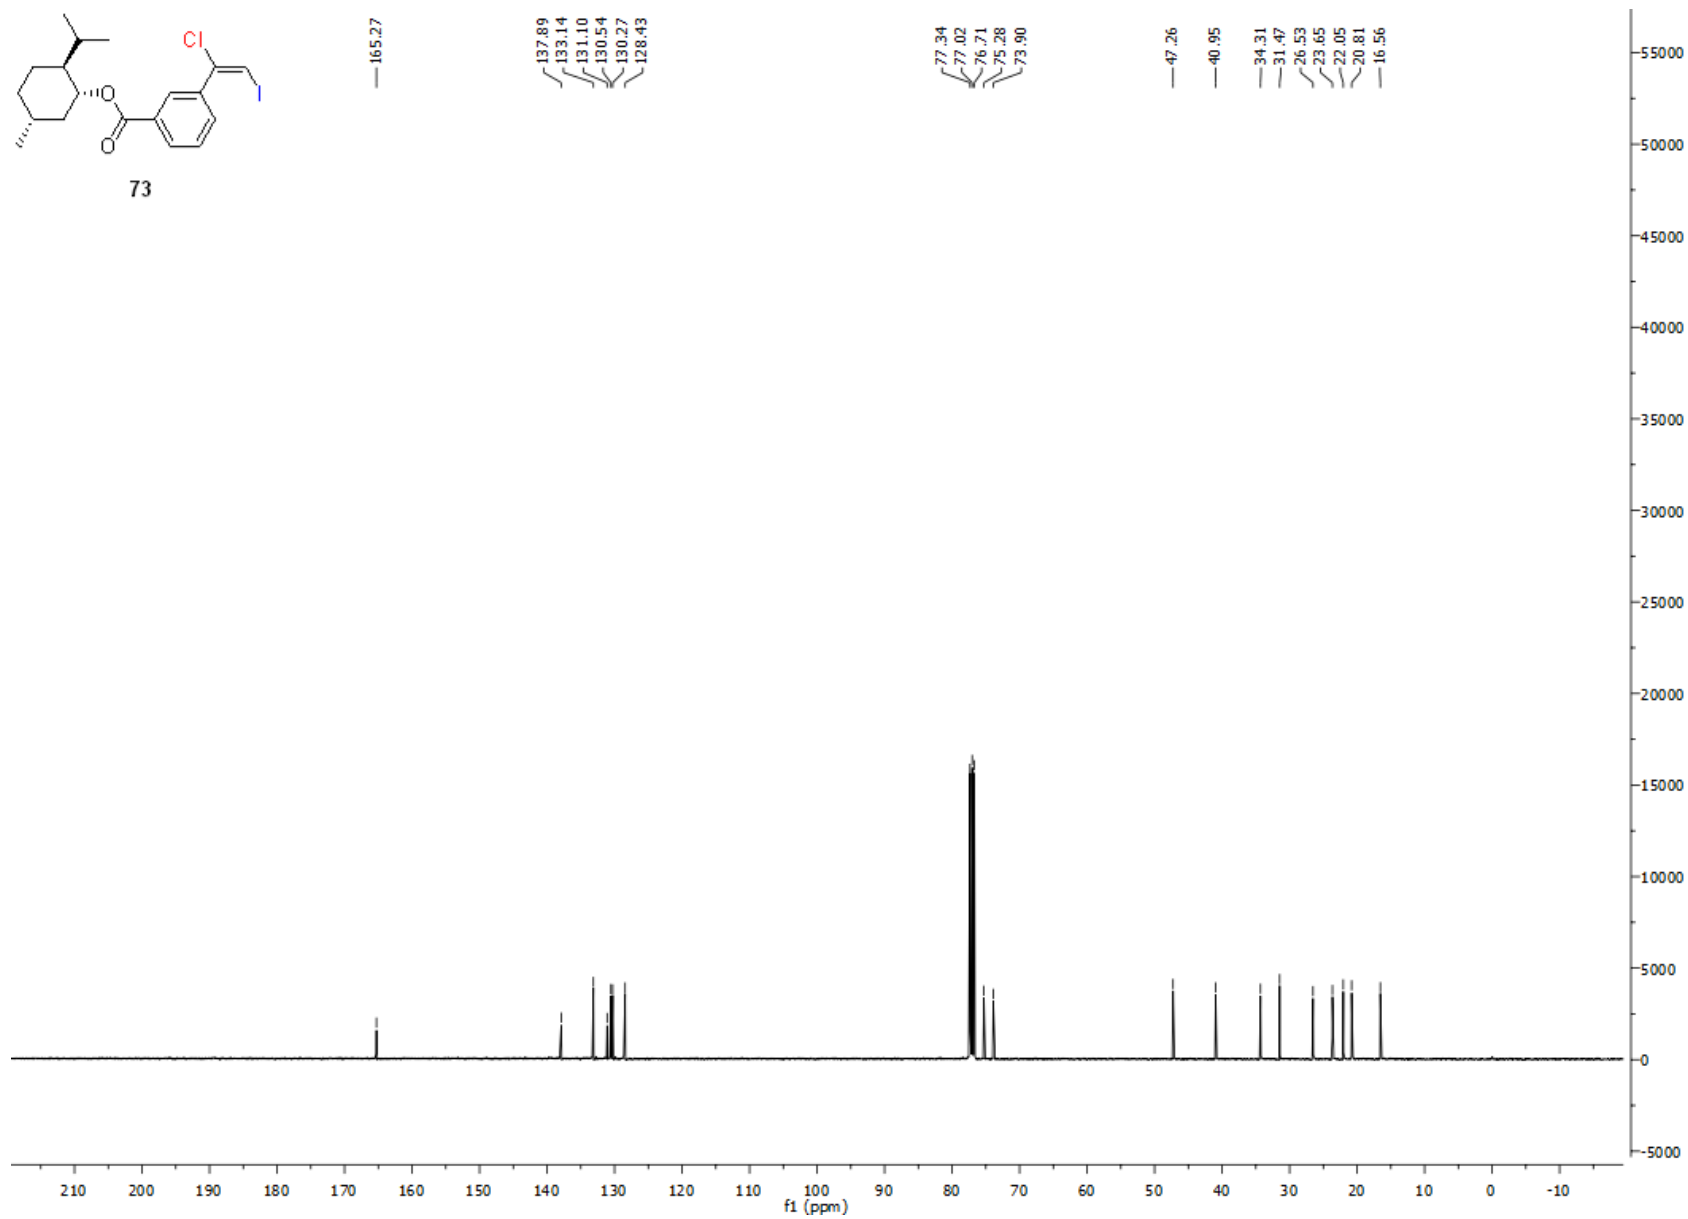

Figure S166. <sup>1</sup>H-NMR of 74

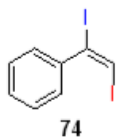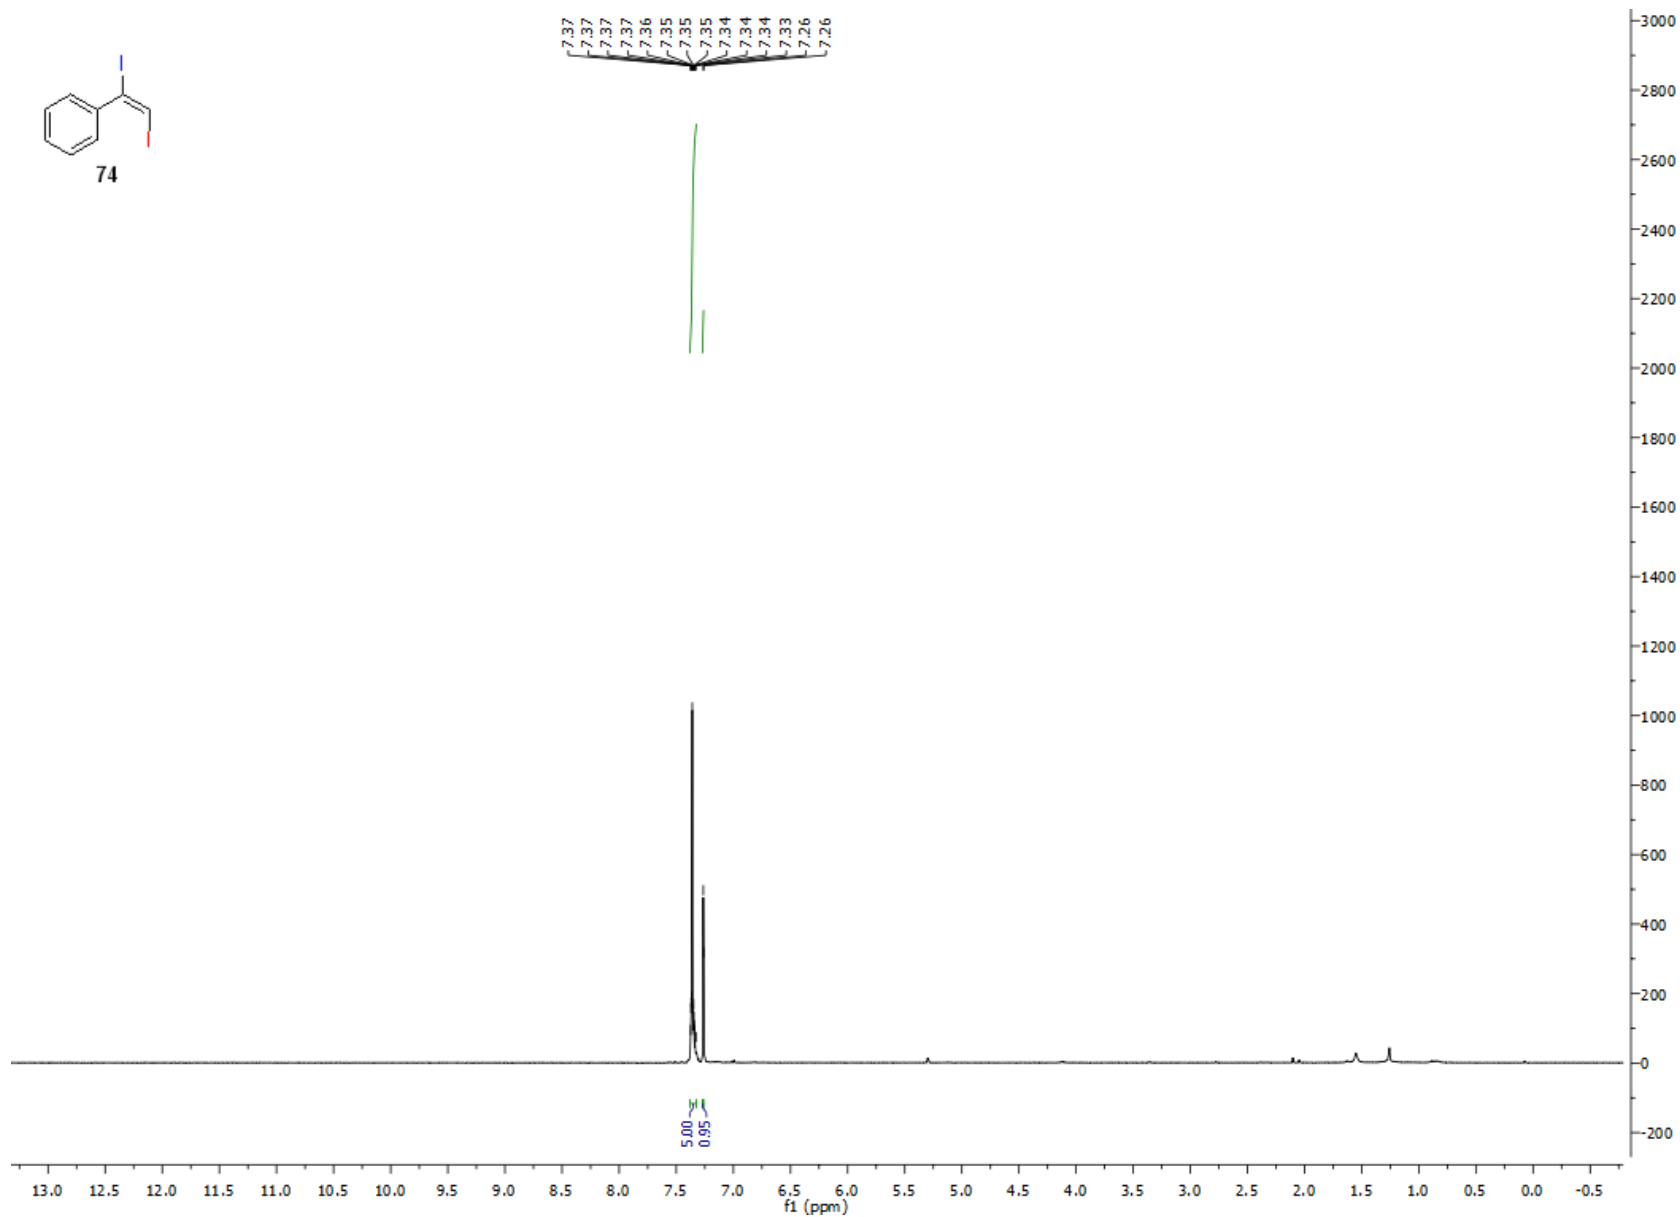

Figure S167.  $^{13}\text{C}$ -NMR of 74

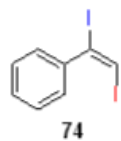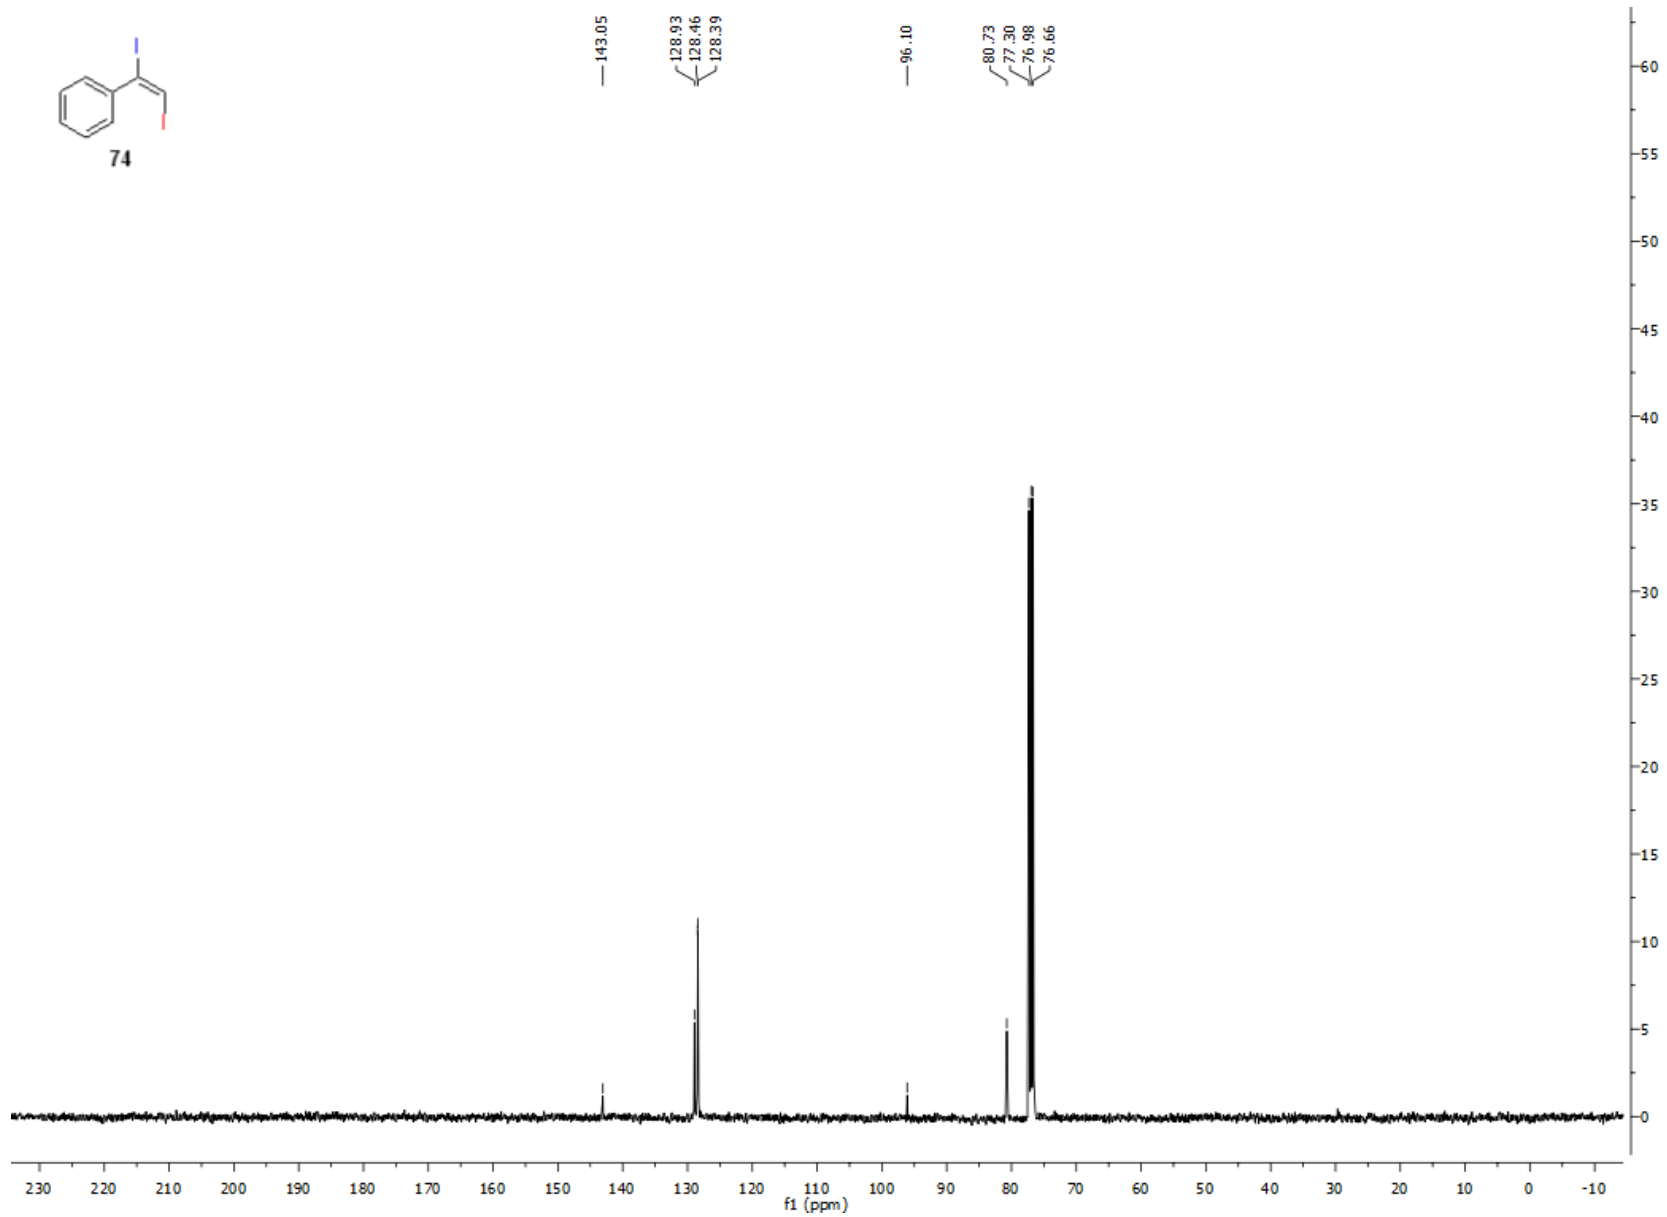

Figure S168. <sup>1</sup>H-NMR of 75

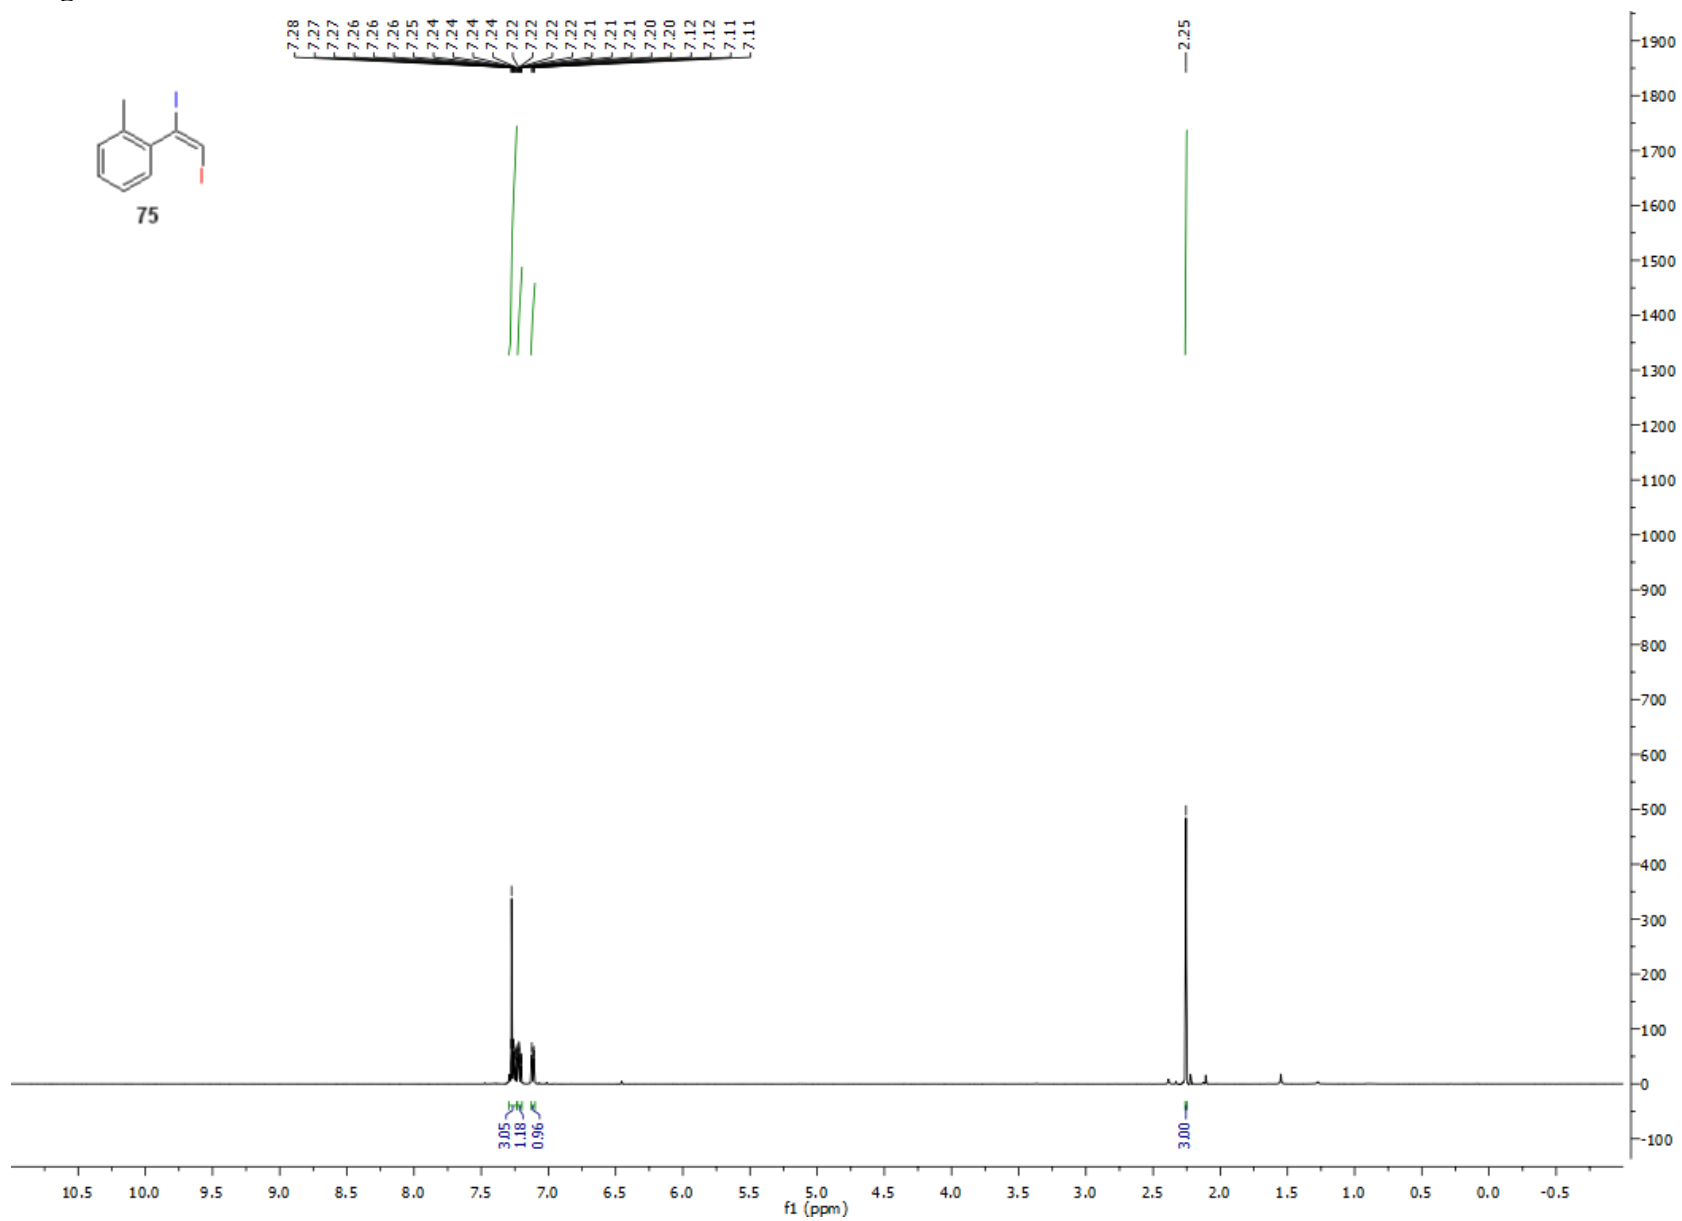

Figure S169.  $^{13}\text{C}$ -NMR of 75

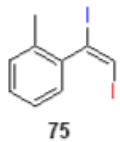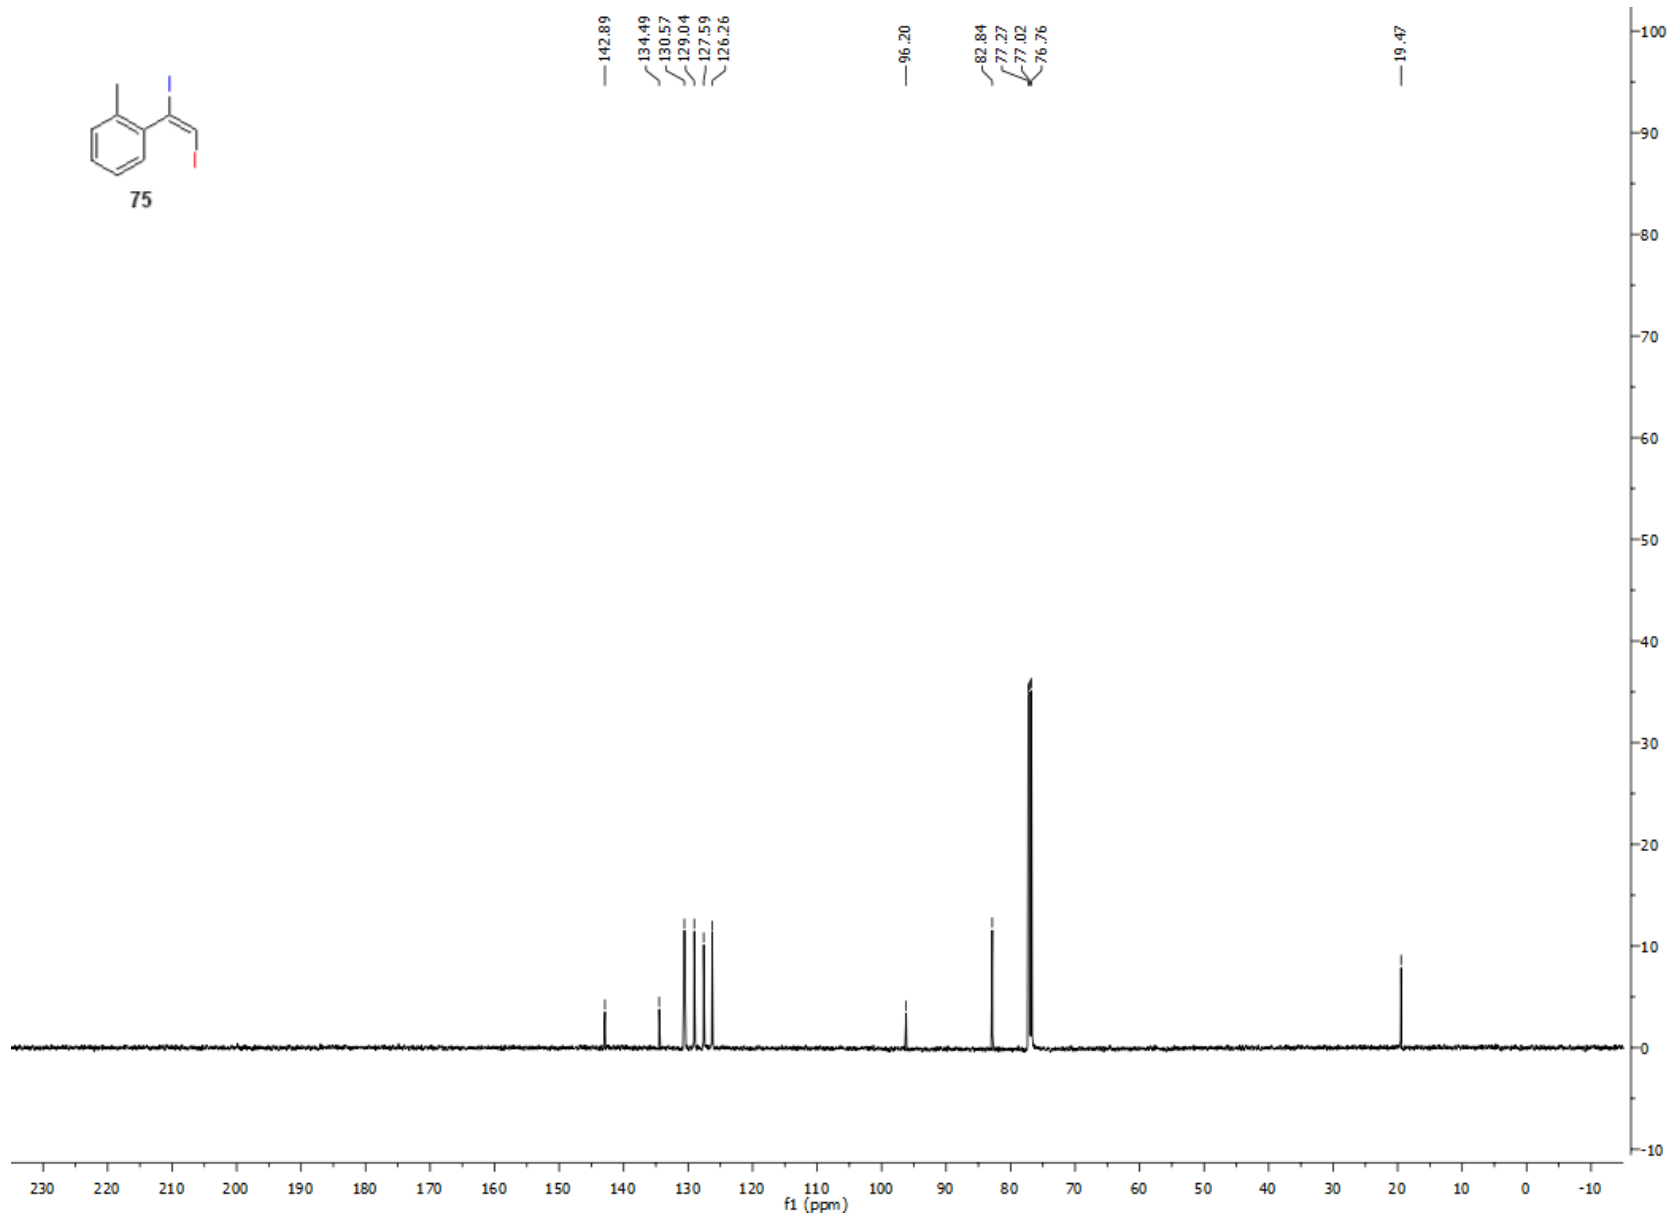

Figure S170. <sup>1</sup>H-NMR of 76

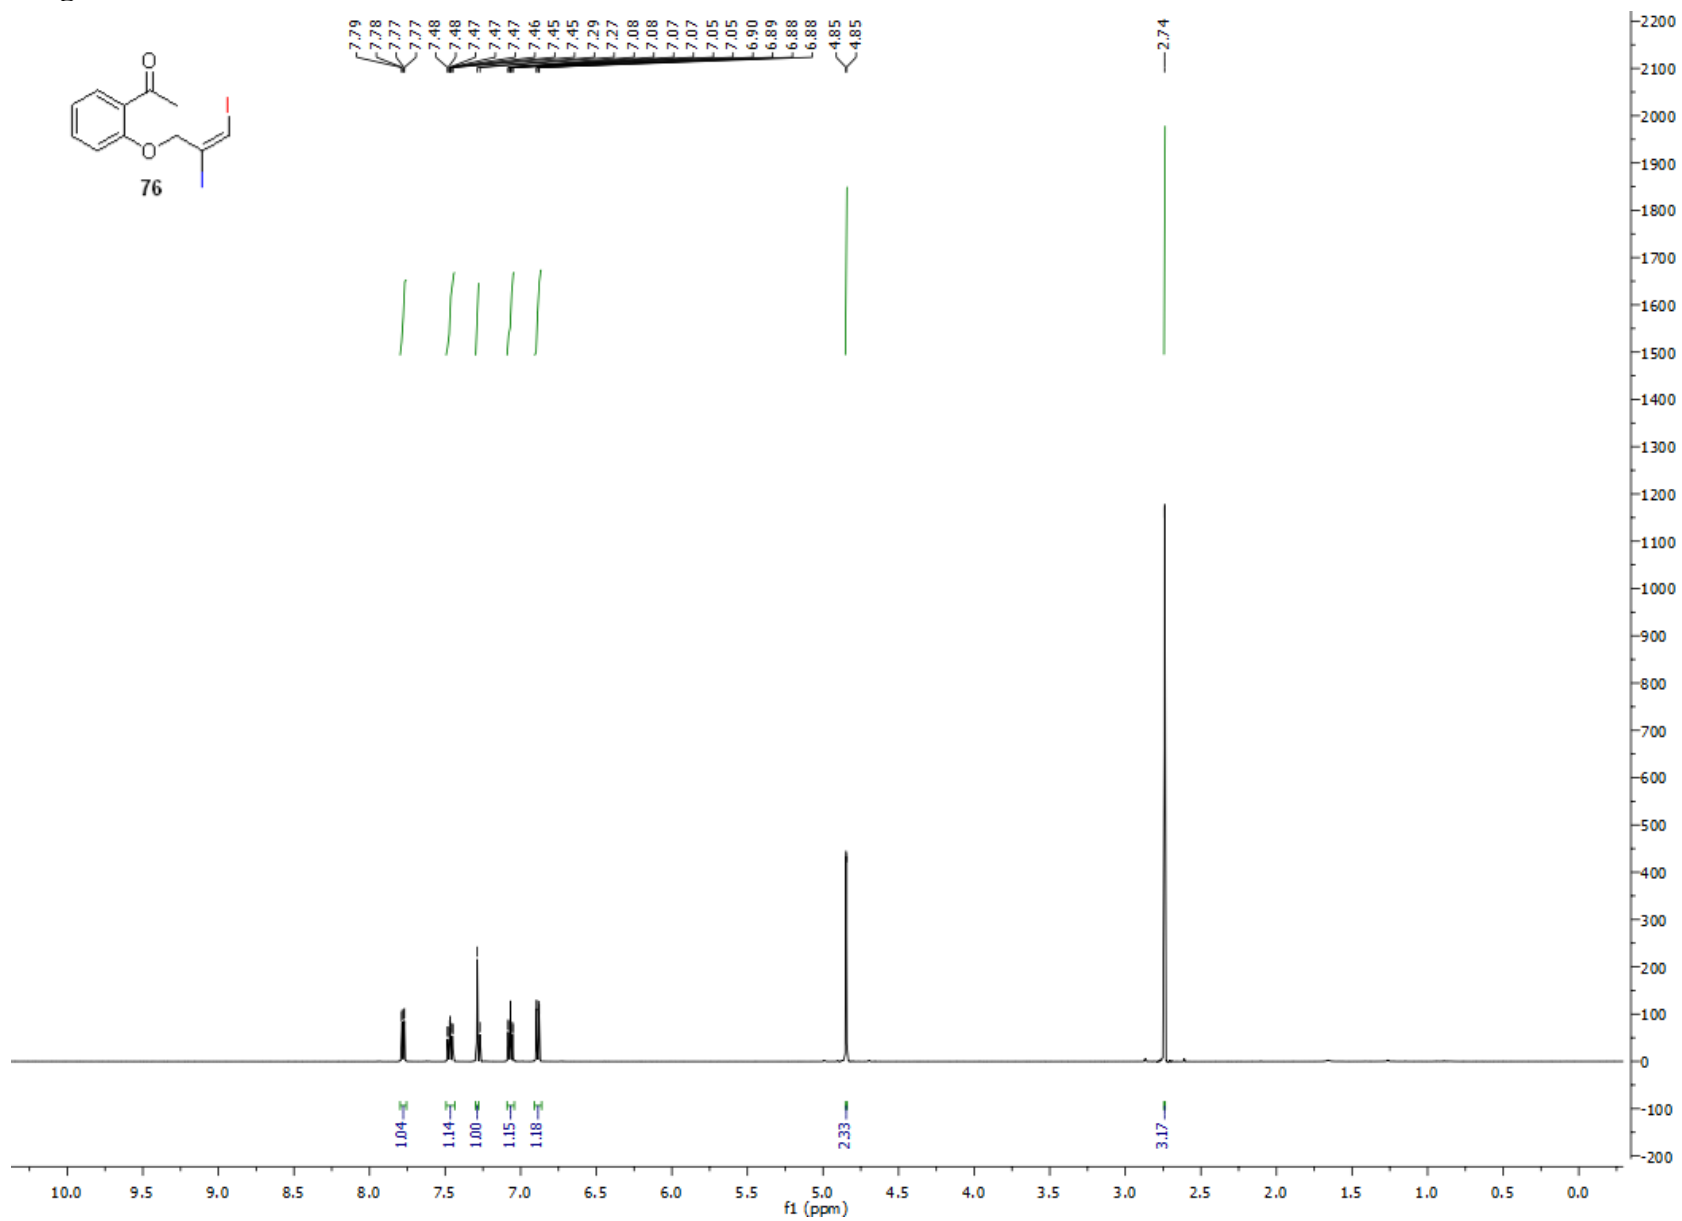



Figure S171.  $^{13}\text{C}$ -NMR of 76

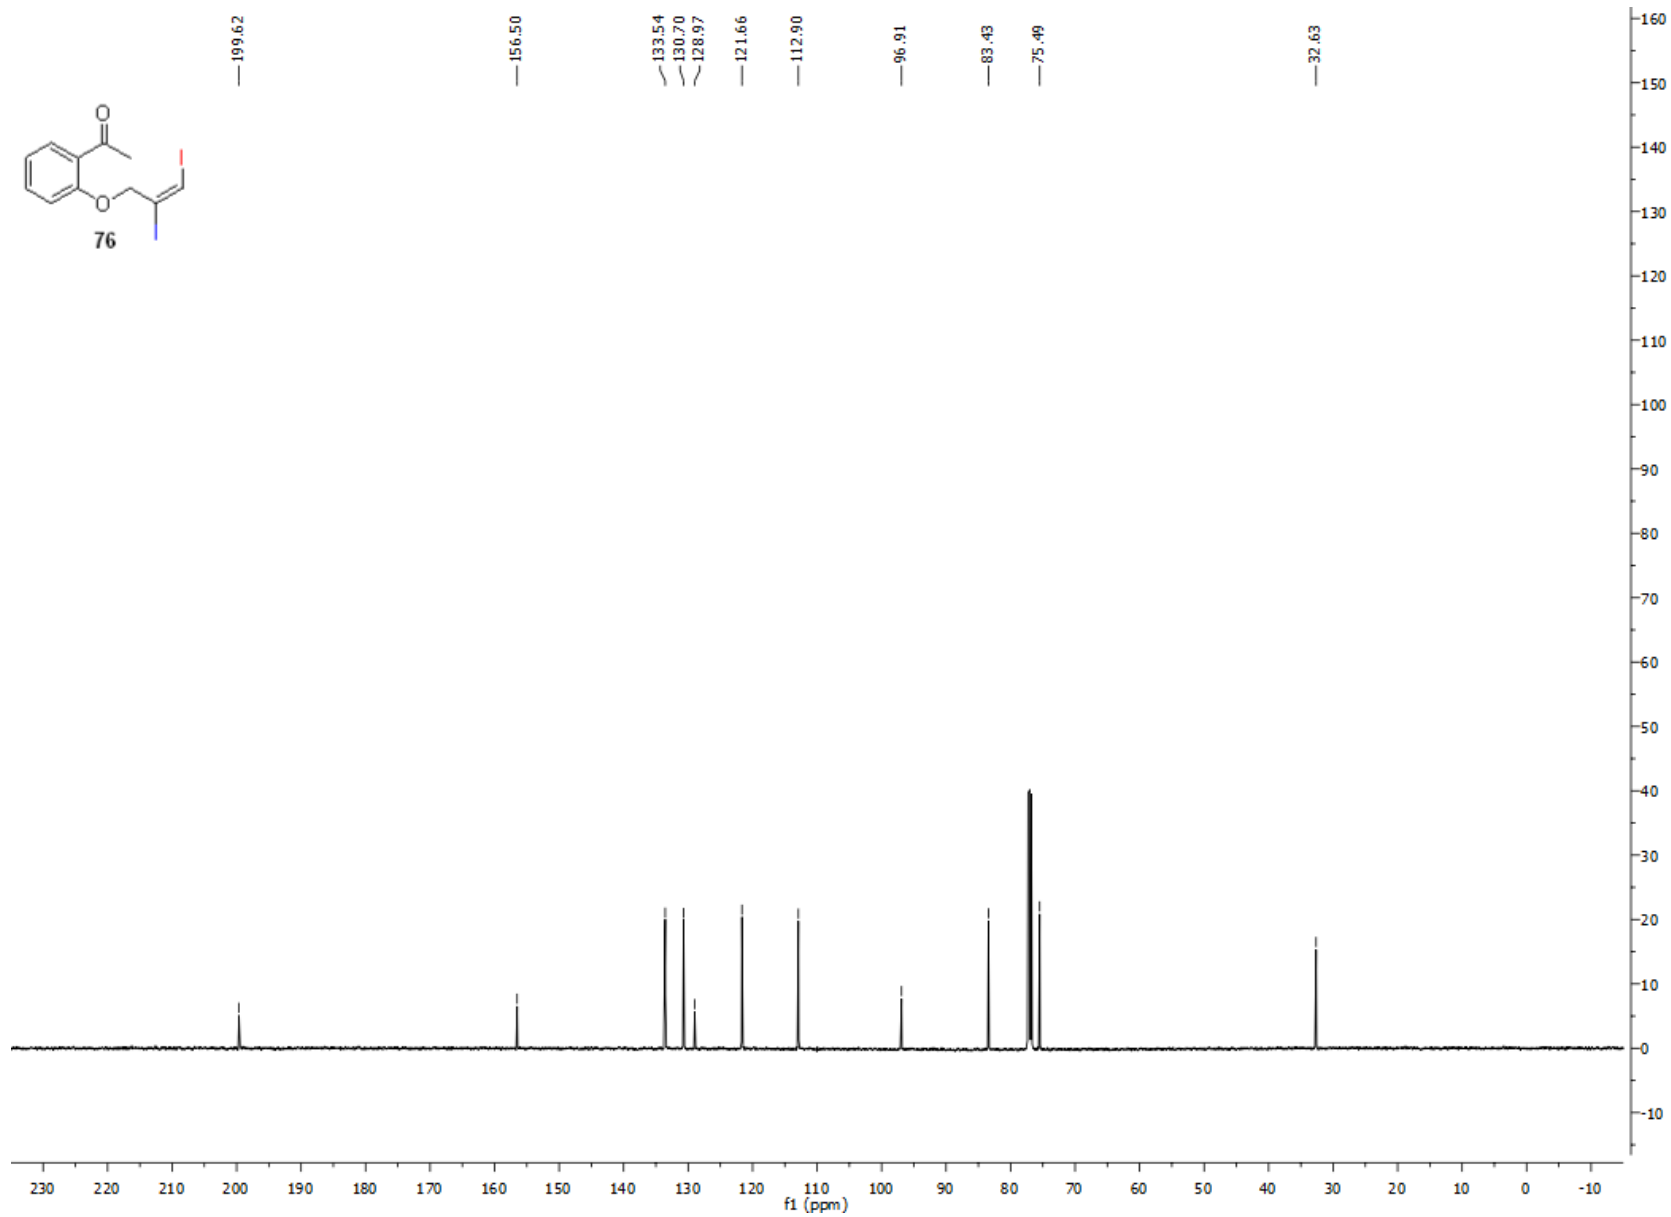

Figure S172. <sup>1</sup>H-NMR of 77

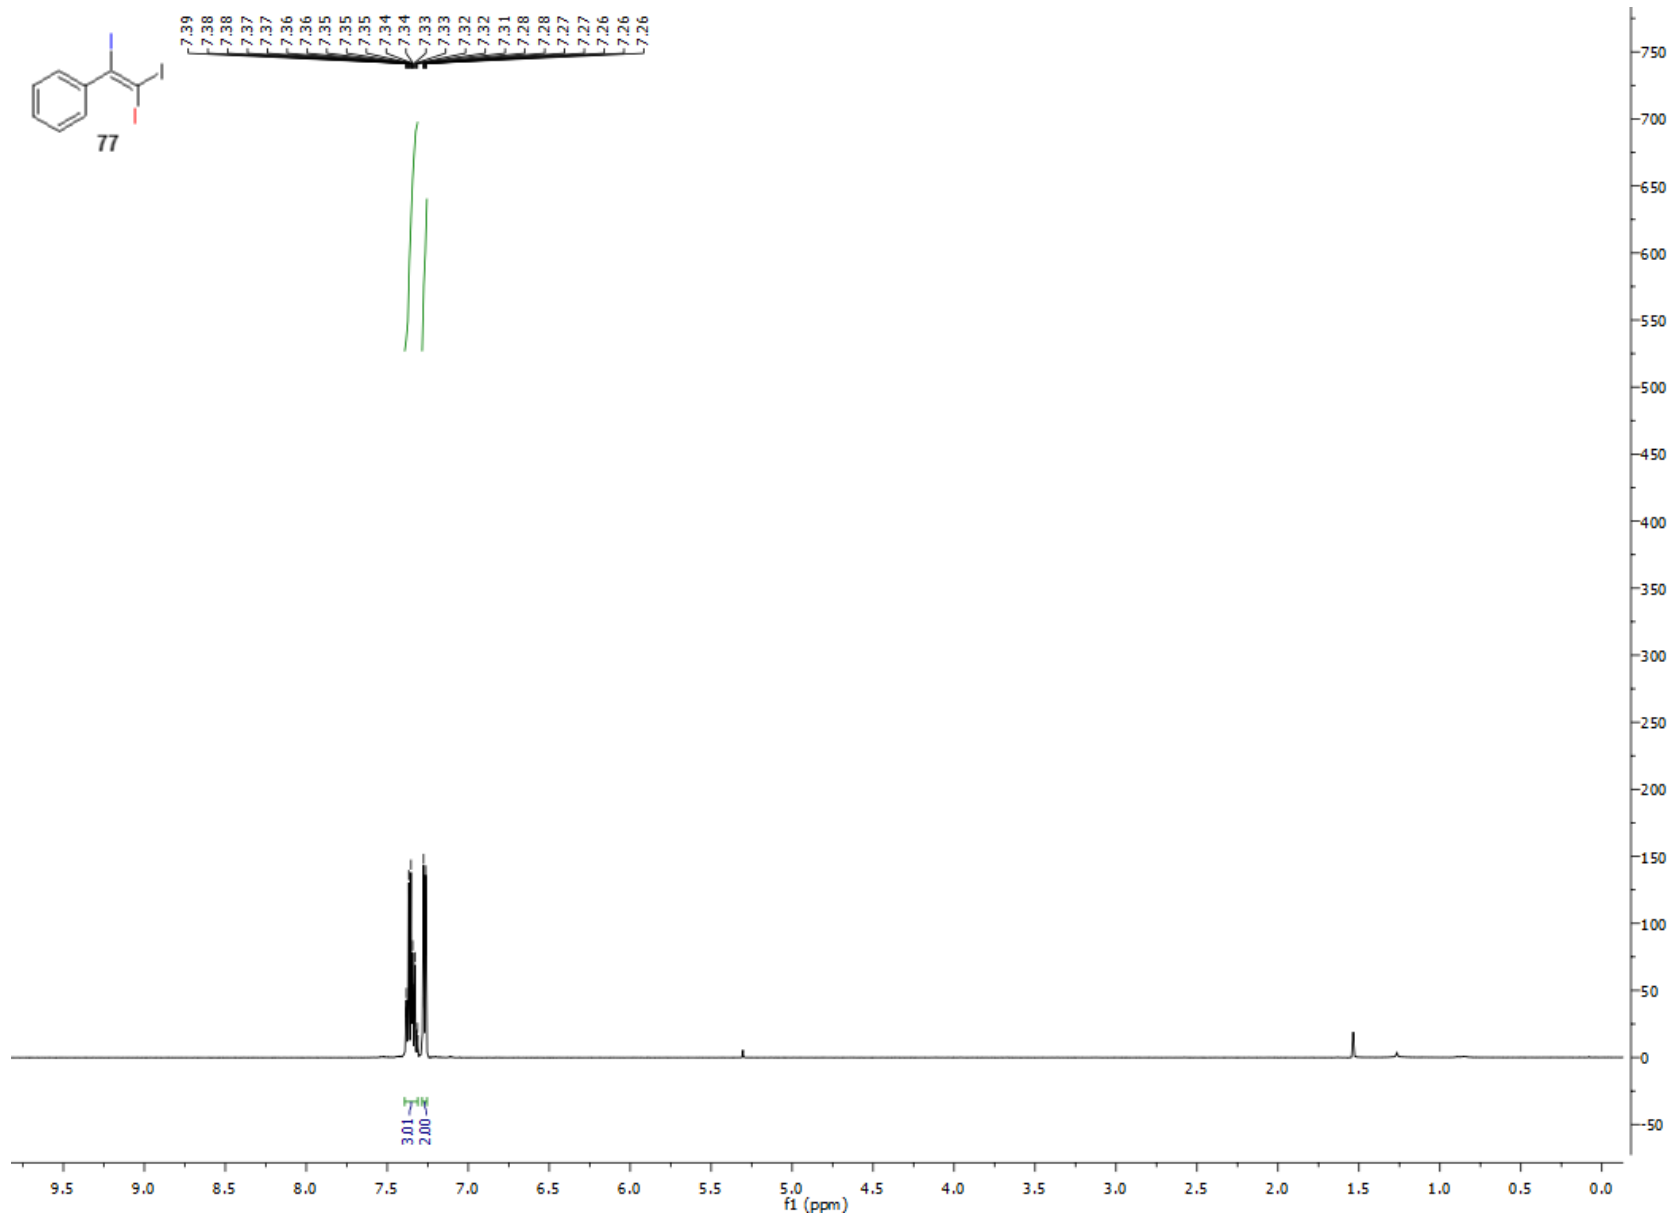

Figure S173.  $^{13}\text{C}$ -NMR of 77

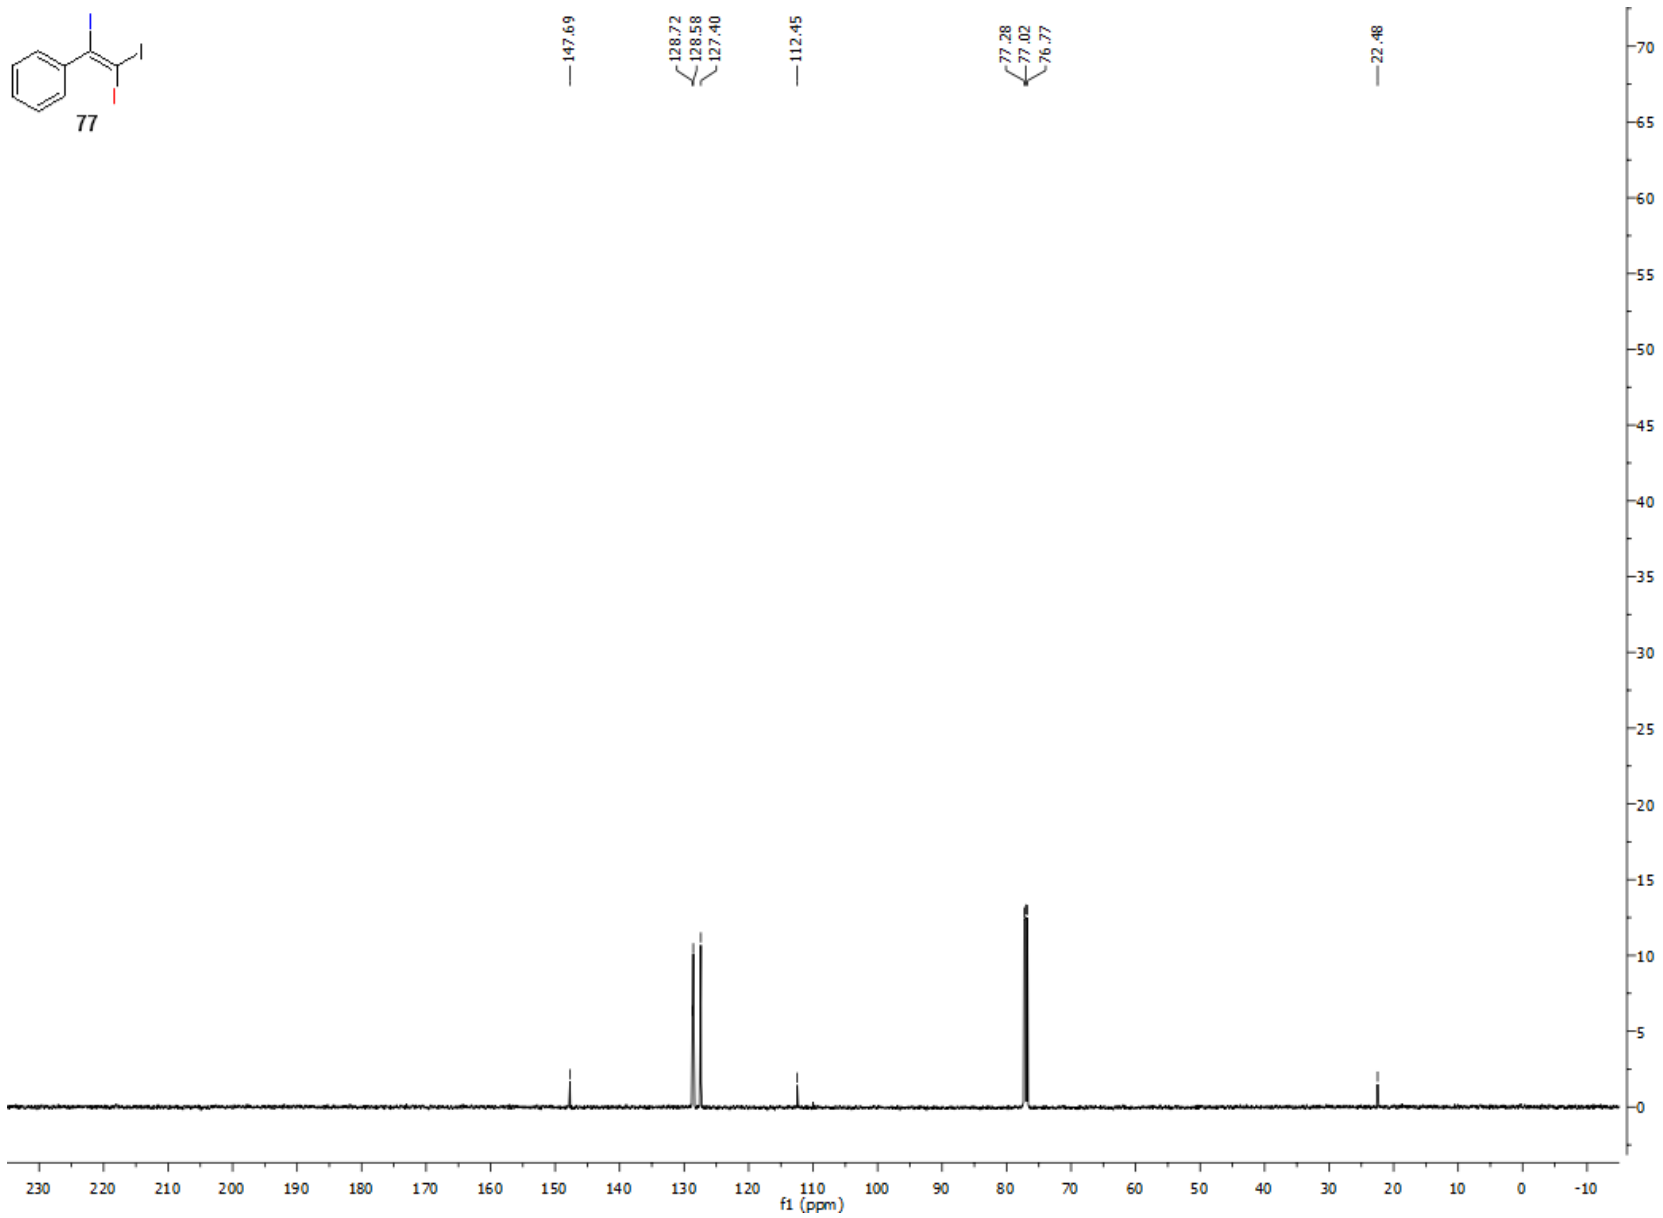

Figure S174. <sup>1</sup>H-NMR of 78

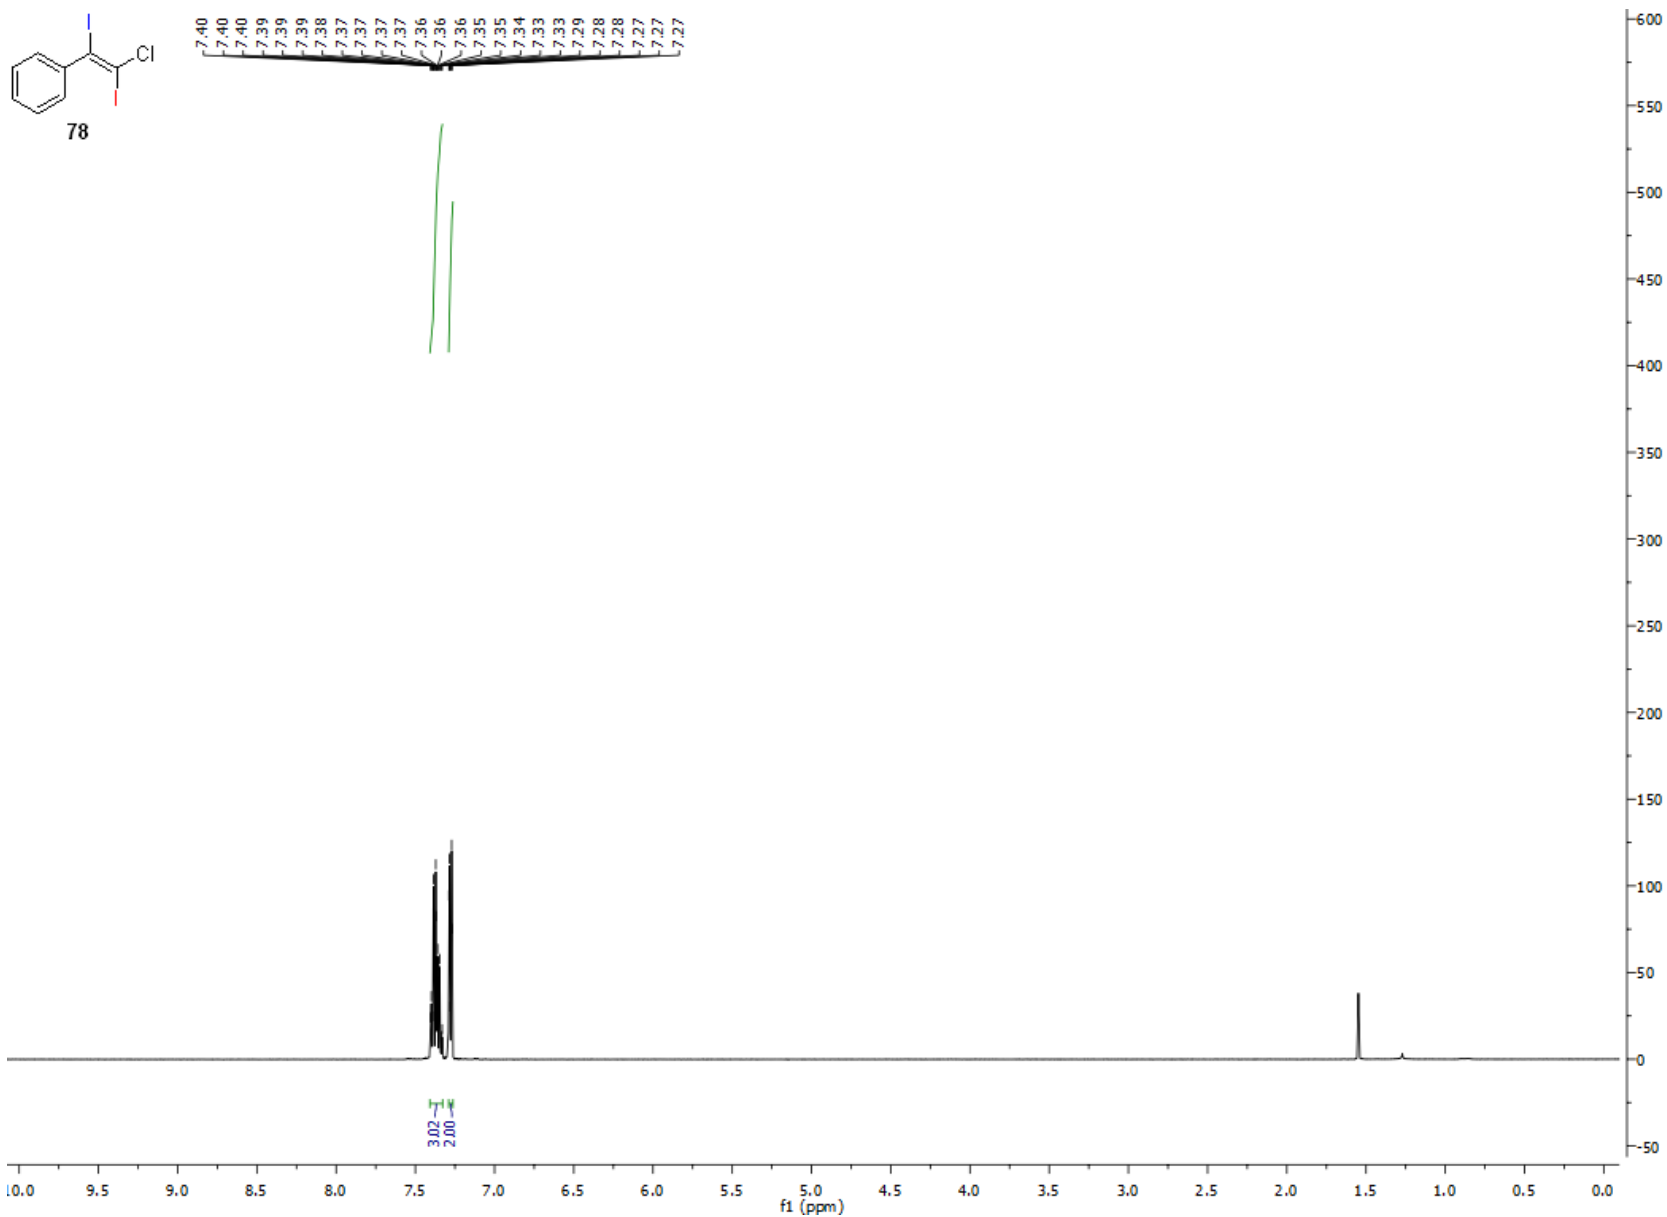

Figure S175.  $^{13}\text{C}$ -NMR of 78

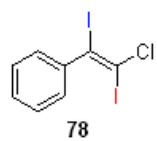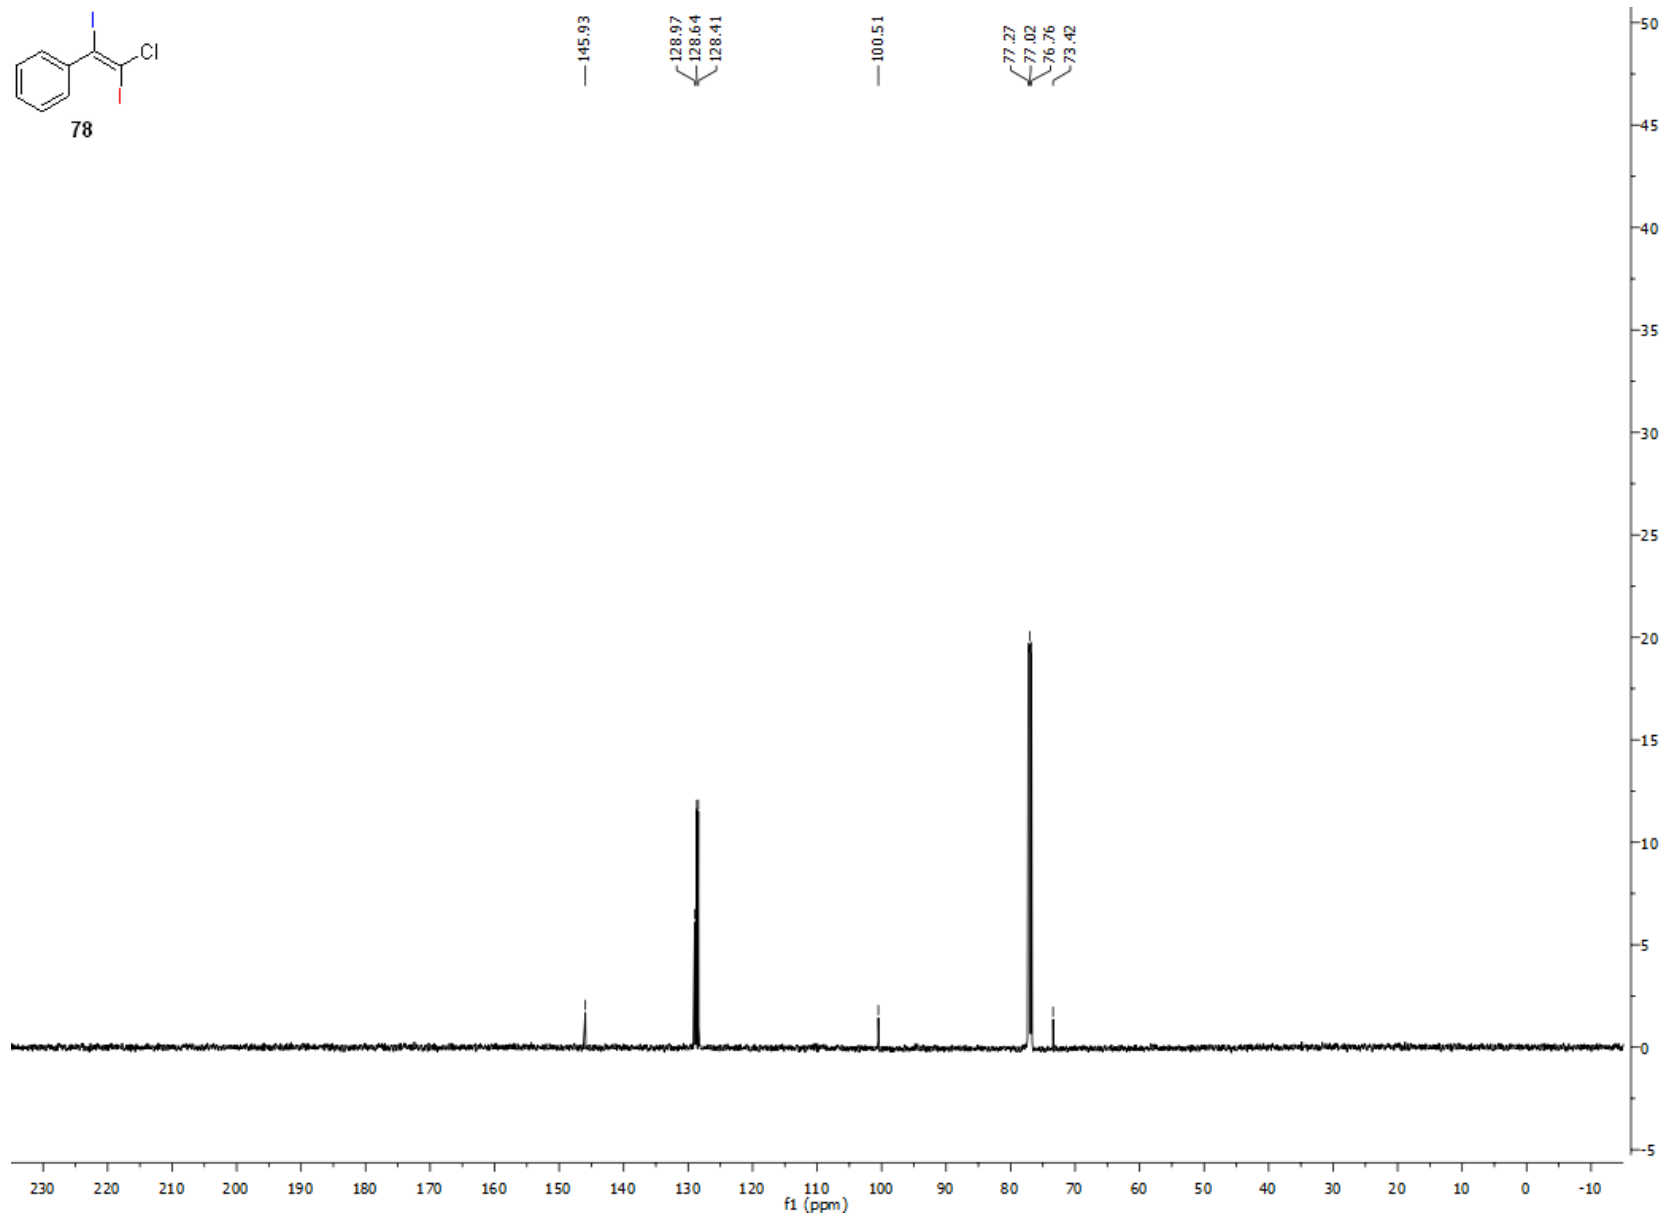

Figure S176. <sup>1</sup>H-NMR of 79

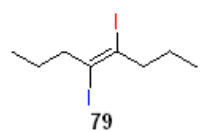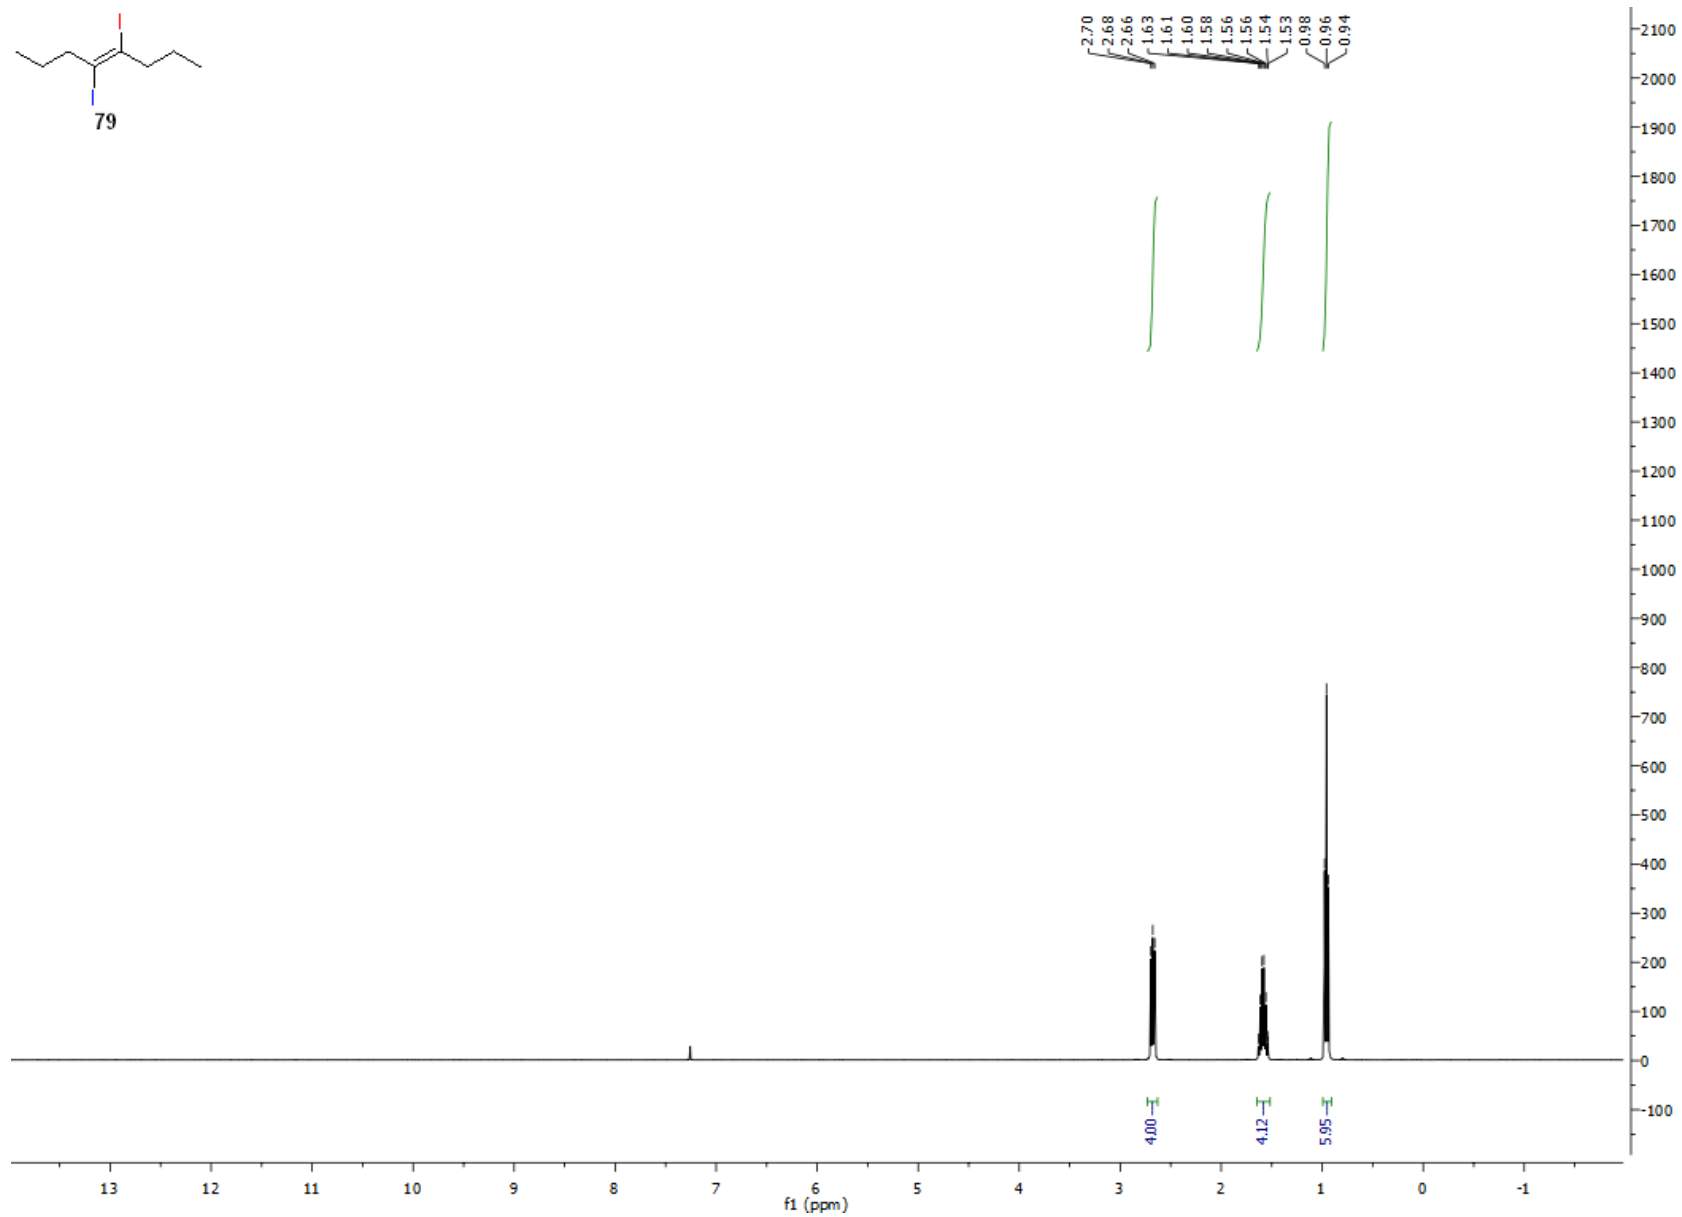

Figure S177.  $^{13}\text{C}$ -NMR of 79

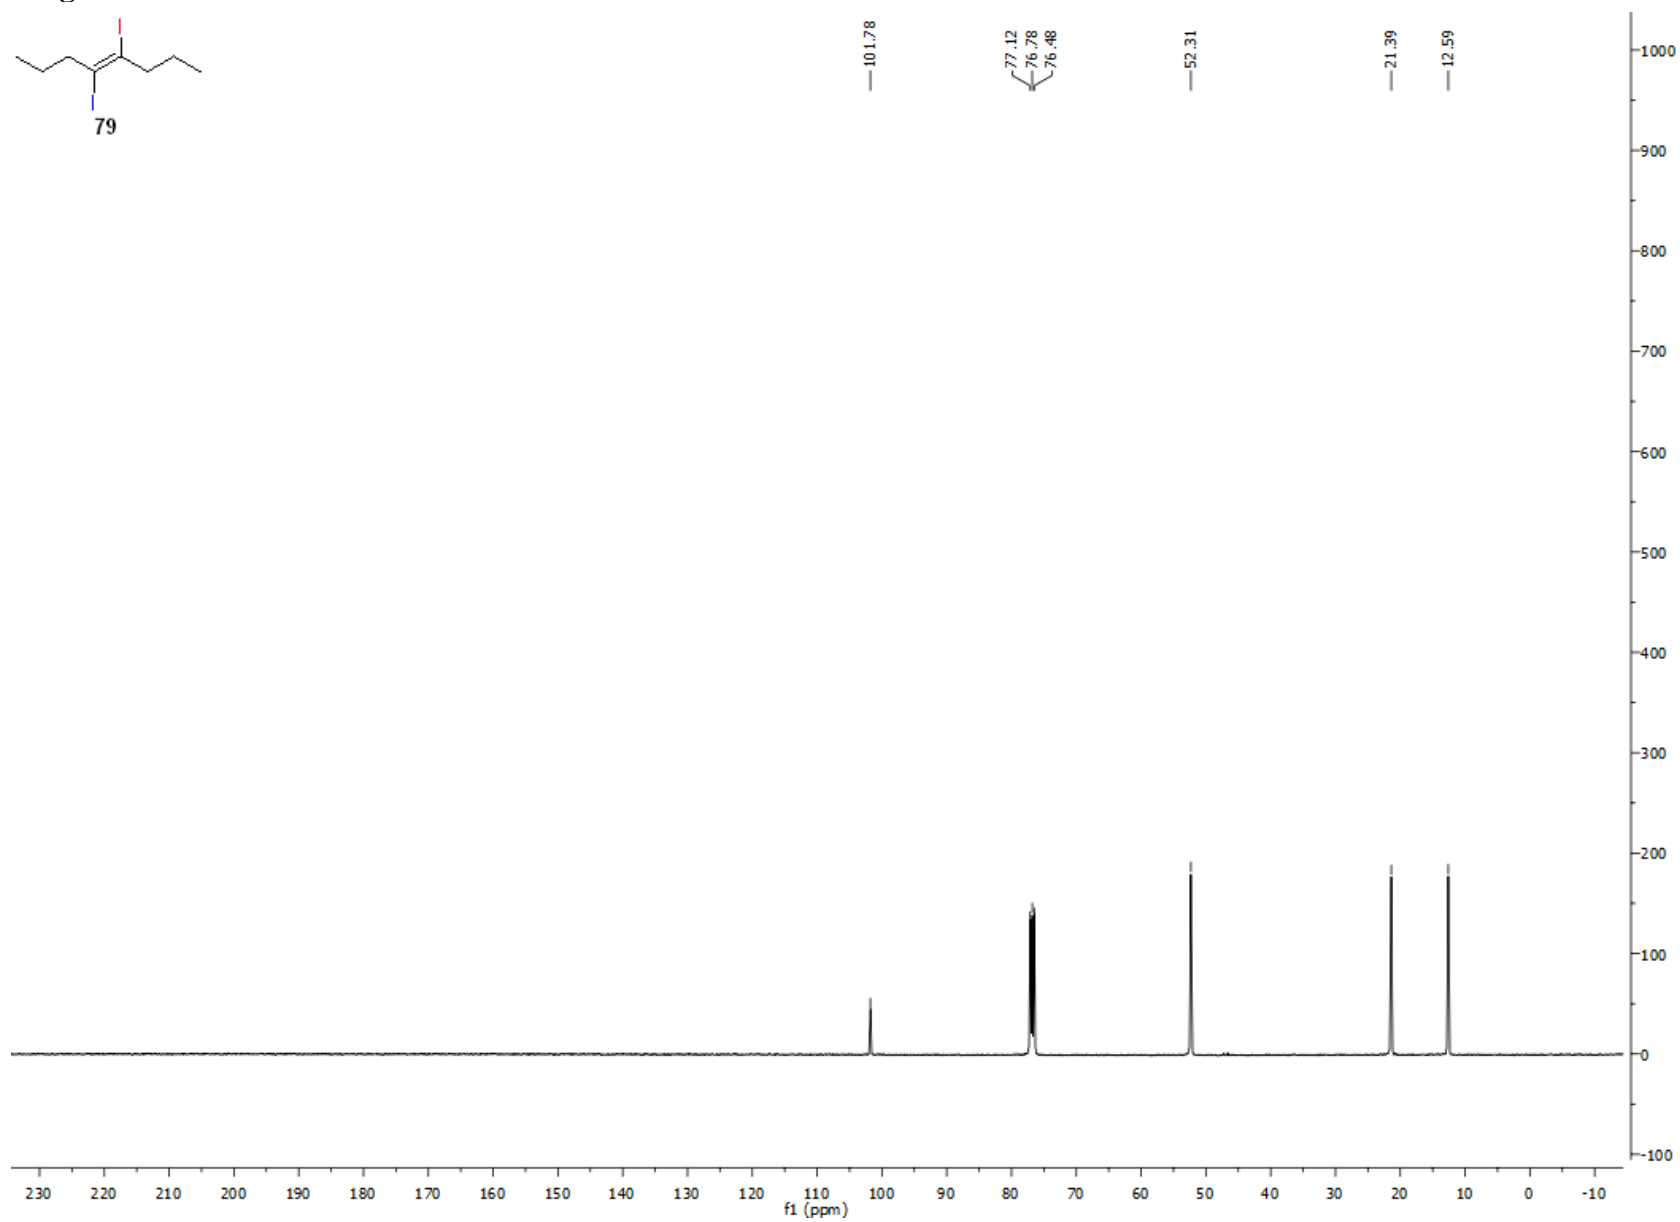

Figure S178. <sup>1</sup>H-NMR of 80

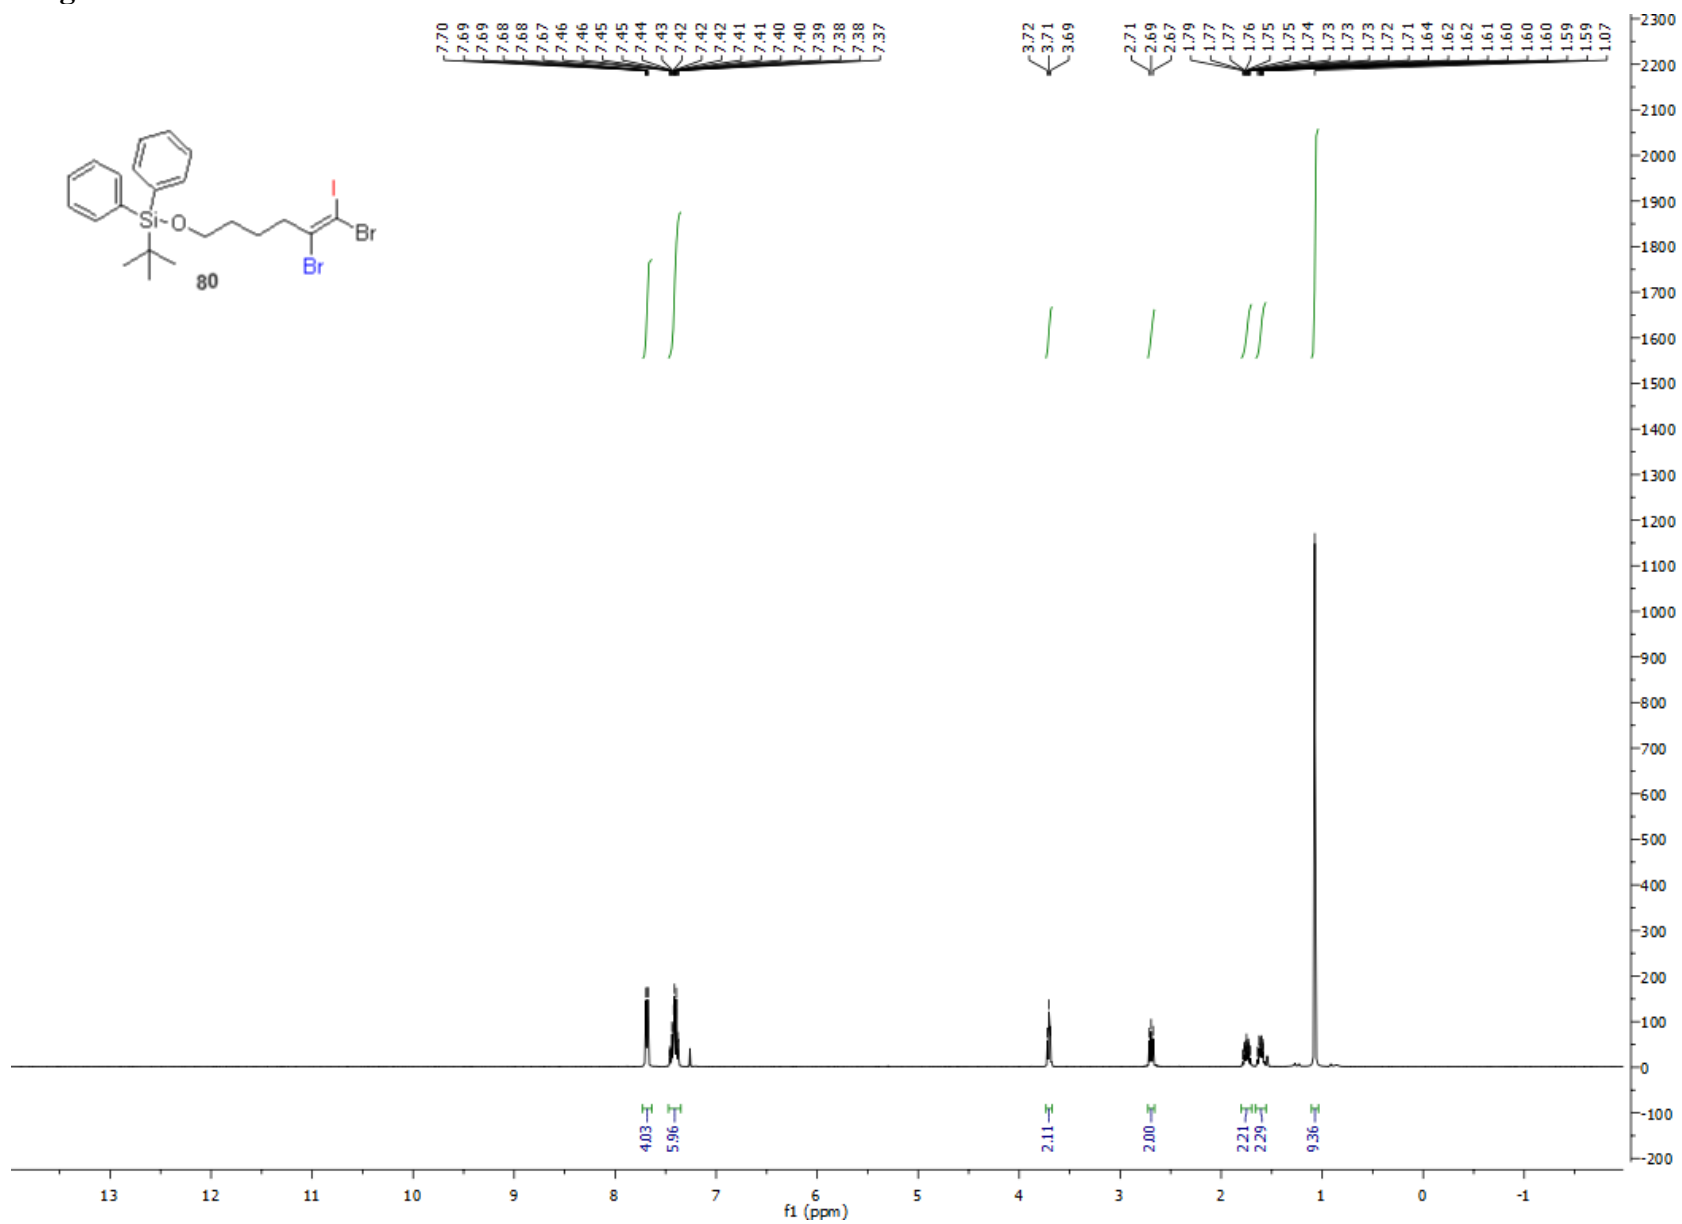



Figure S179.  $^{13}\text{C}$ -NMR of 80

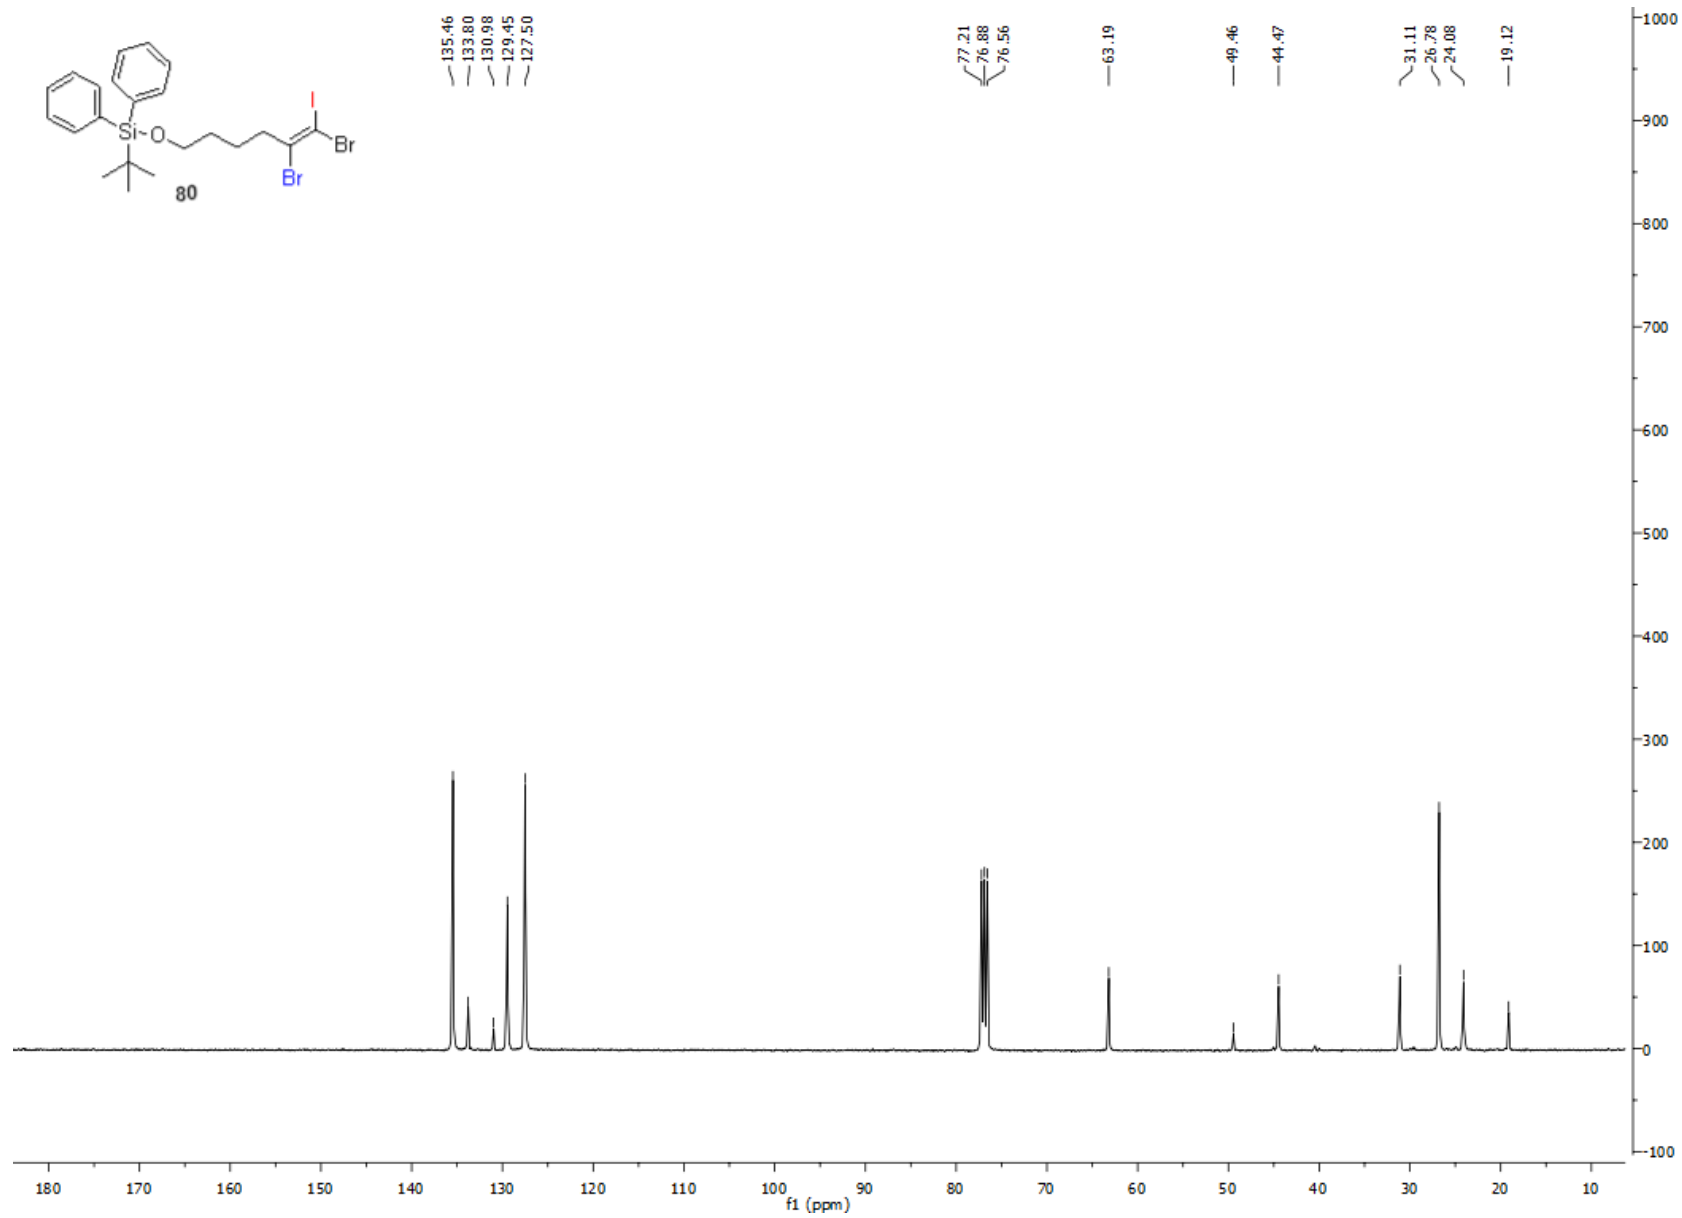

Figure S180. <sup>1</sup>H-NMR of 81

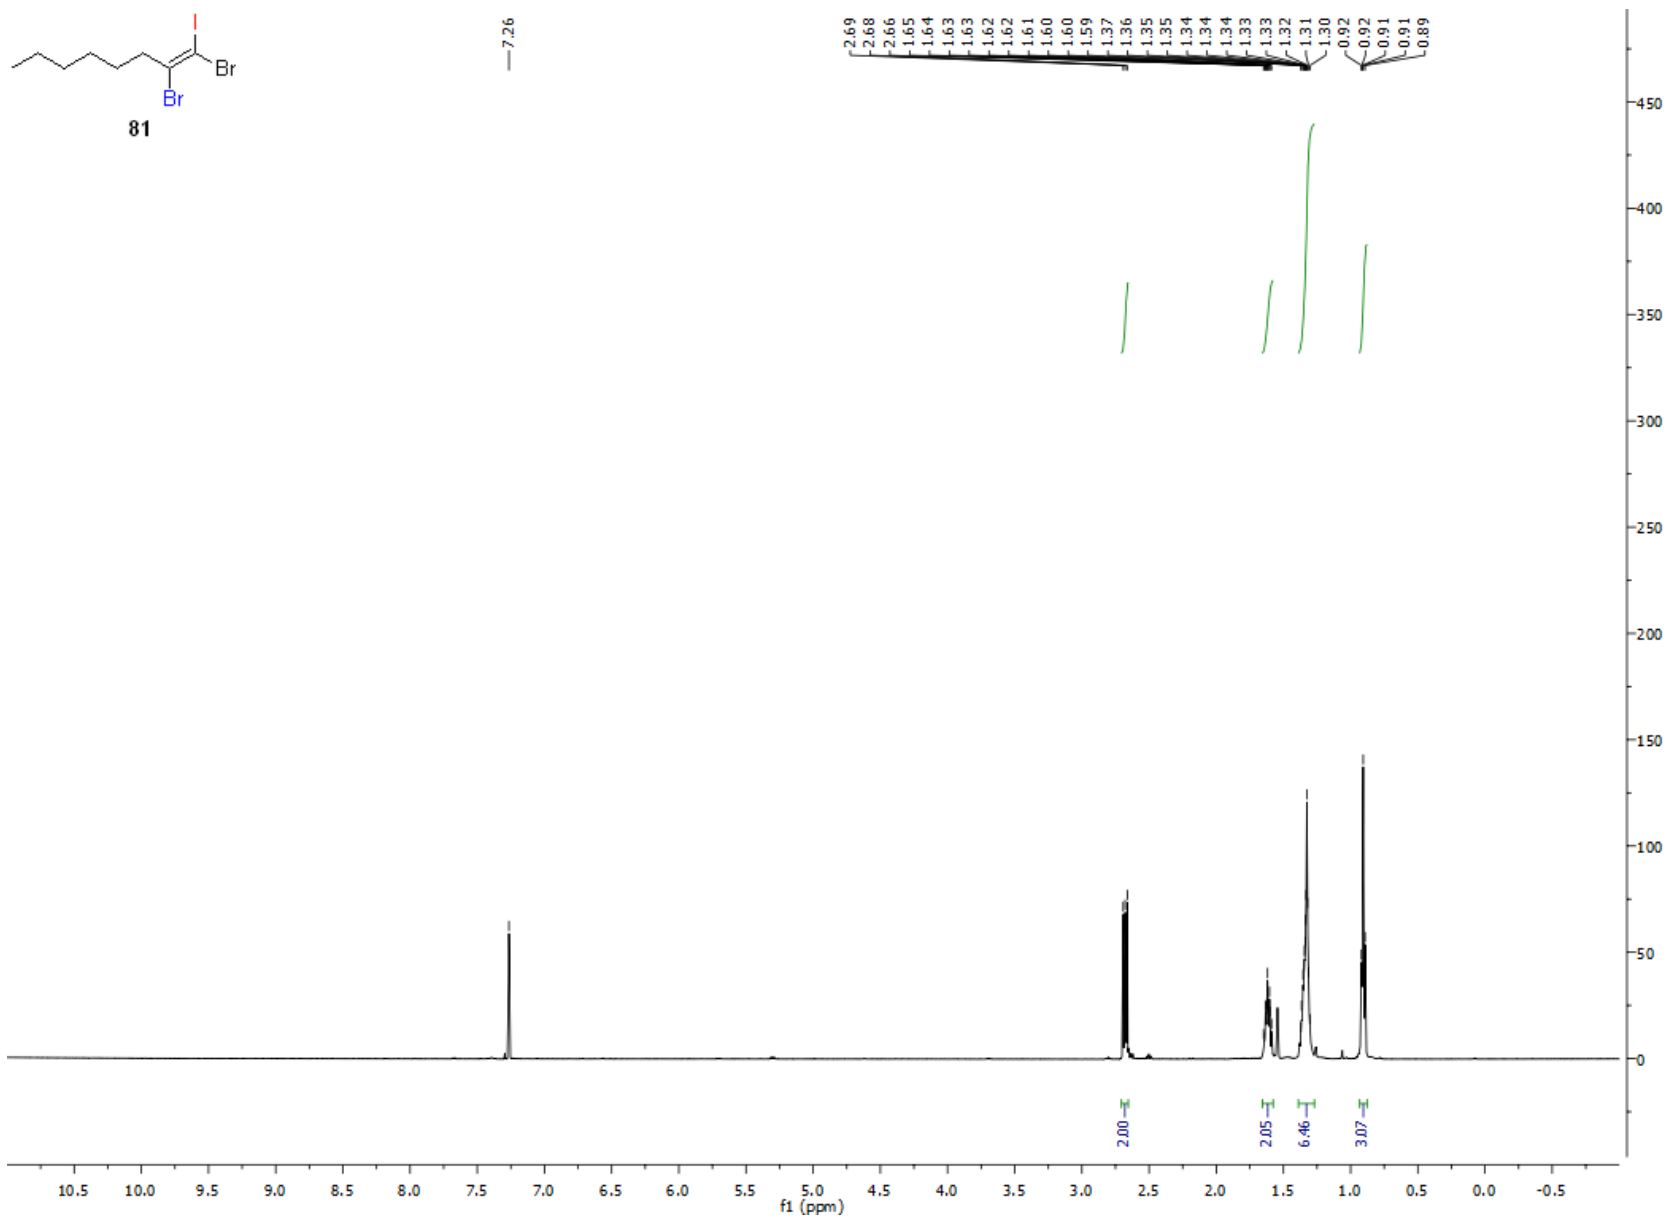

Figure S181.  $^{13}\text{C}$ -NMR of **81**

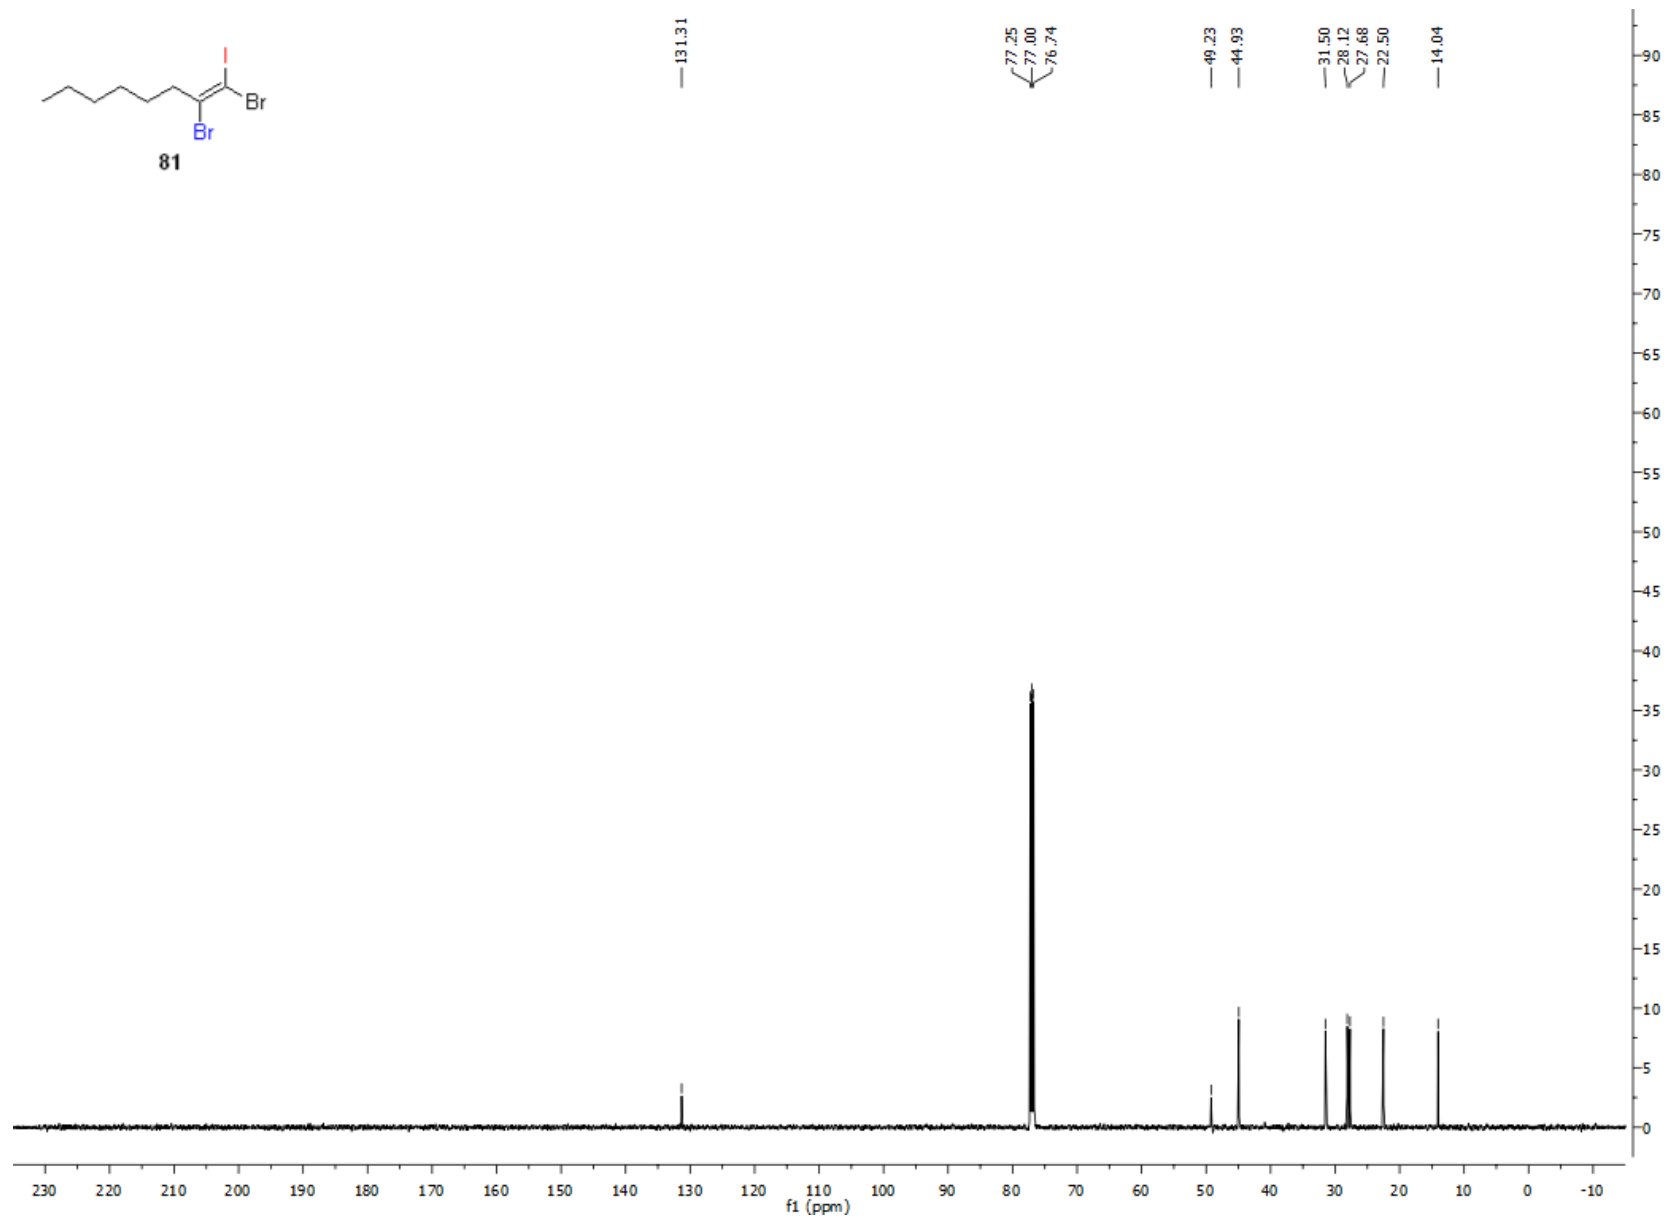

Figure S182.  $^1\text{H-NMR}$  of **82**

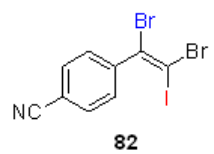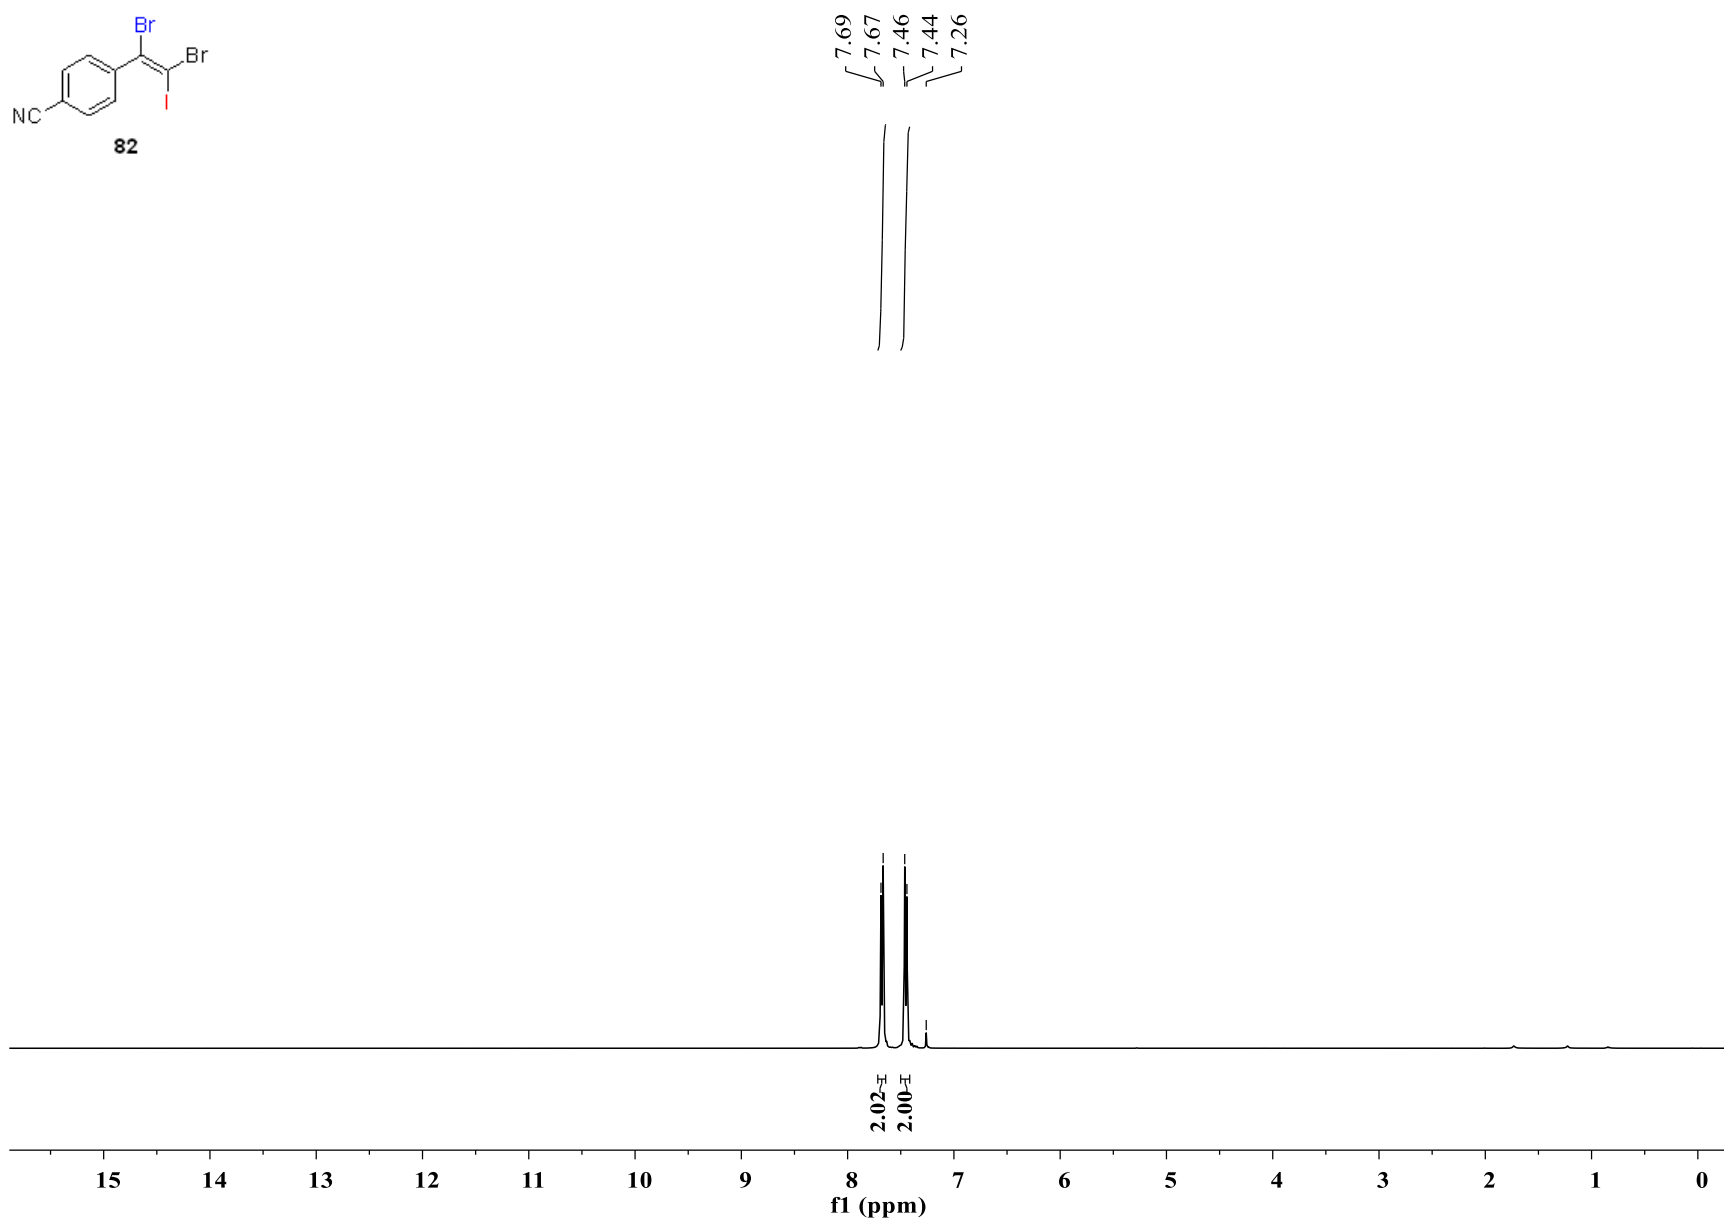

Figure S183.  $^{13}\text{C}$ -NMR of **82**

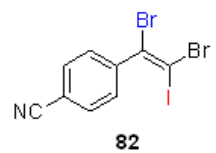

— 146.30

~ 132.61

~ 129.68

~ 123.61

~ 118.12

~ 113.14

{ 77.61

{ 77.30

{ 76.98

— 55.21

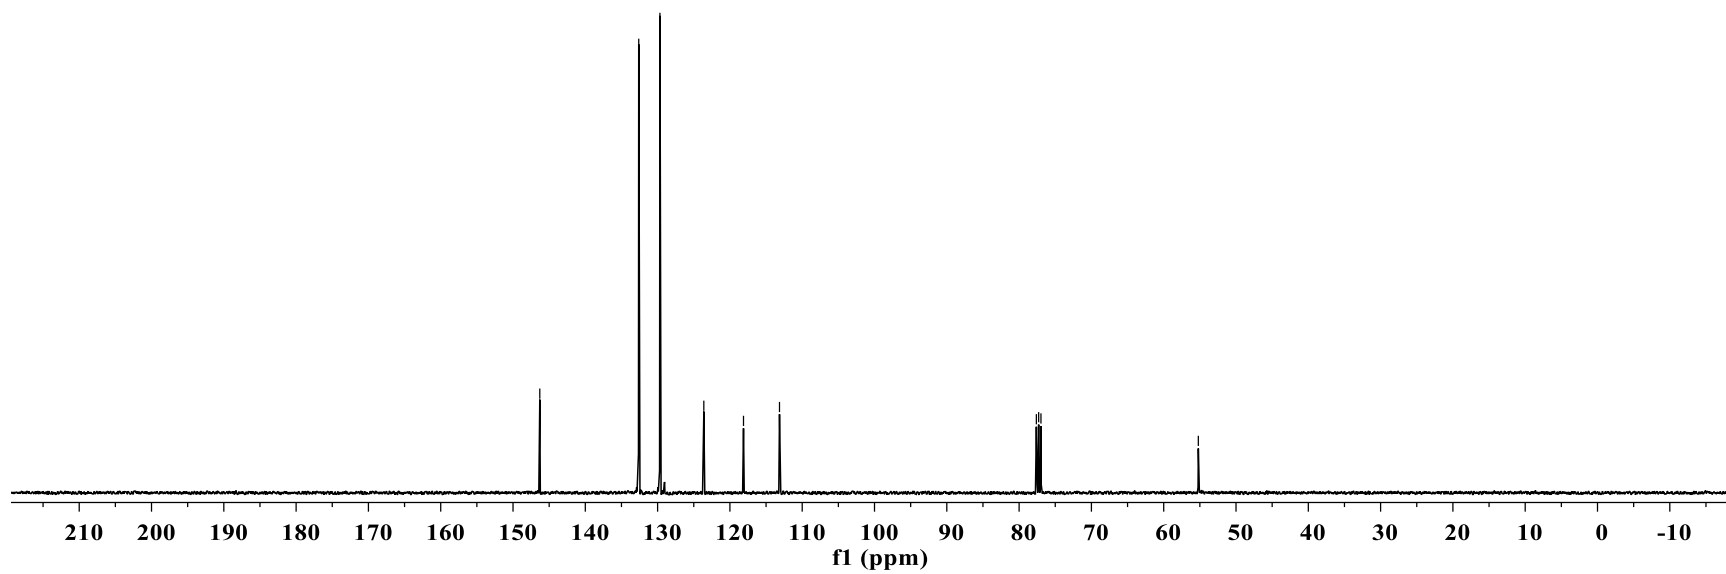

Figure S184. <sup>1</sup>H-NMR of 83

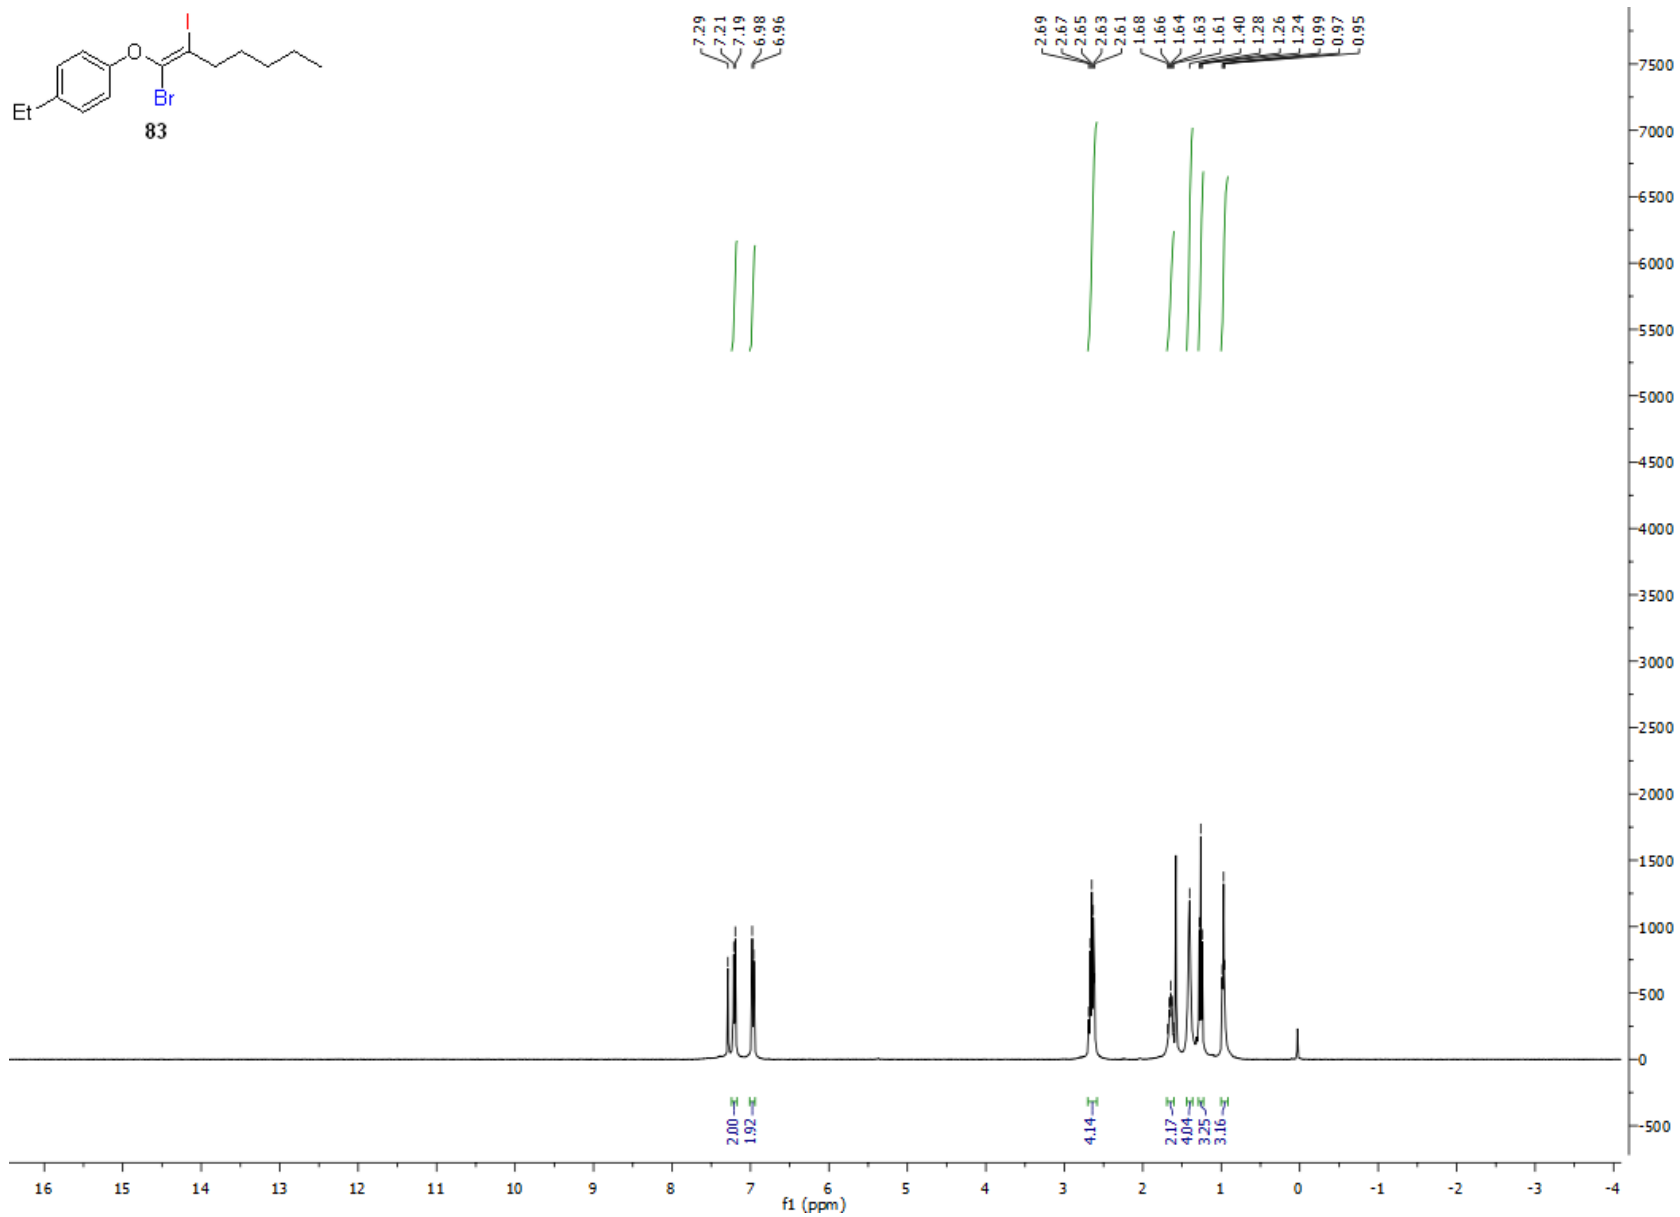

Figure S185.  $^{13}\text{C}$ -NMR of 83

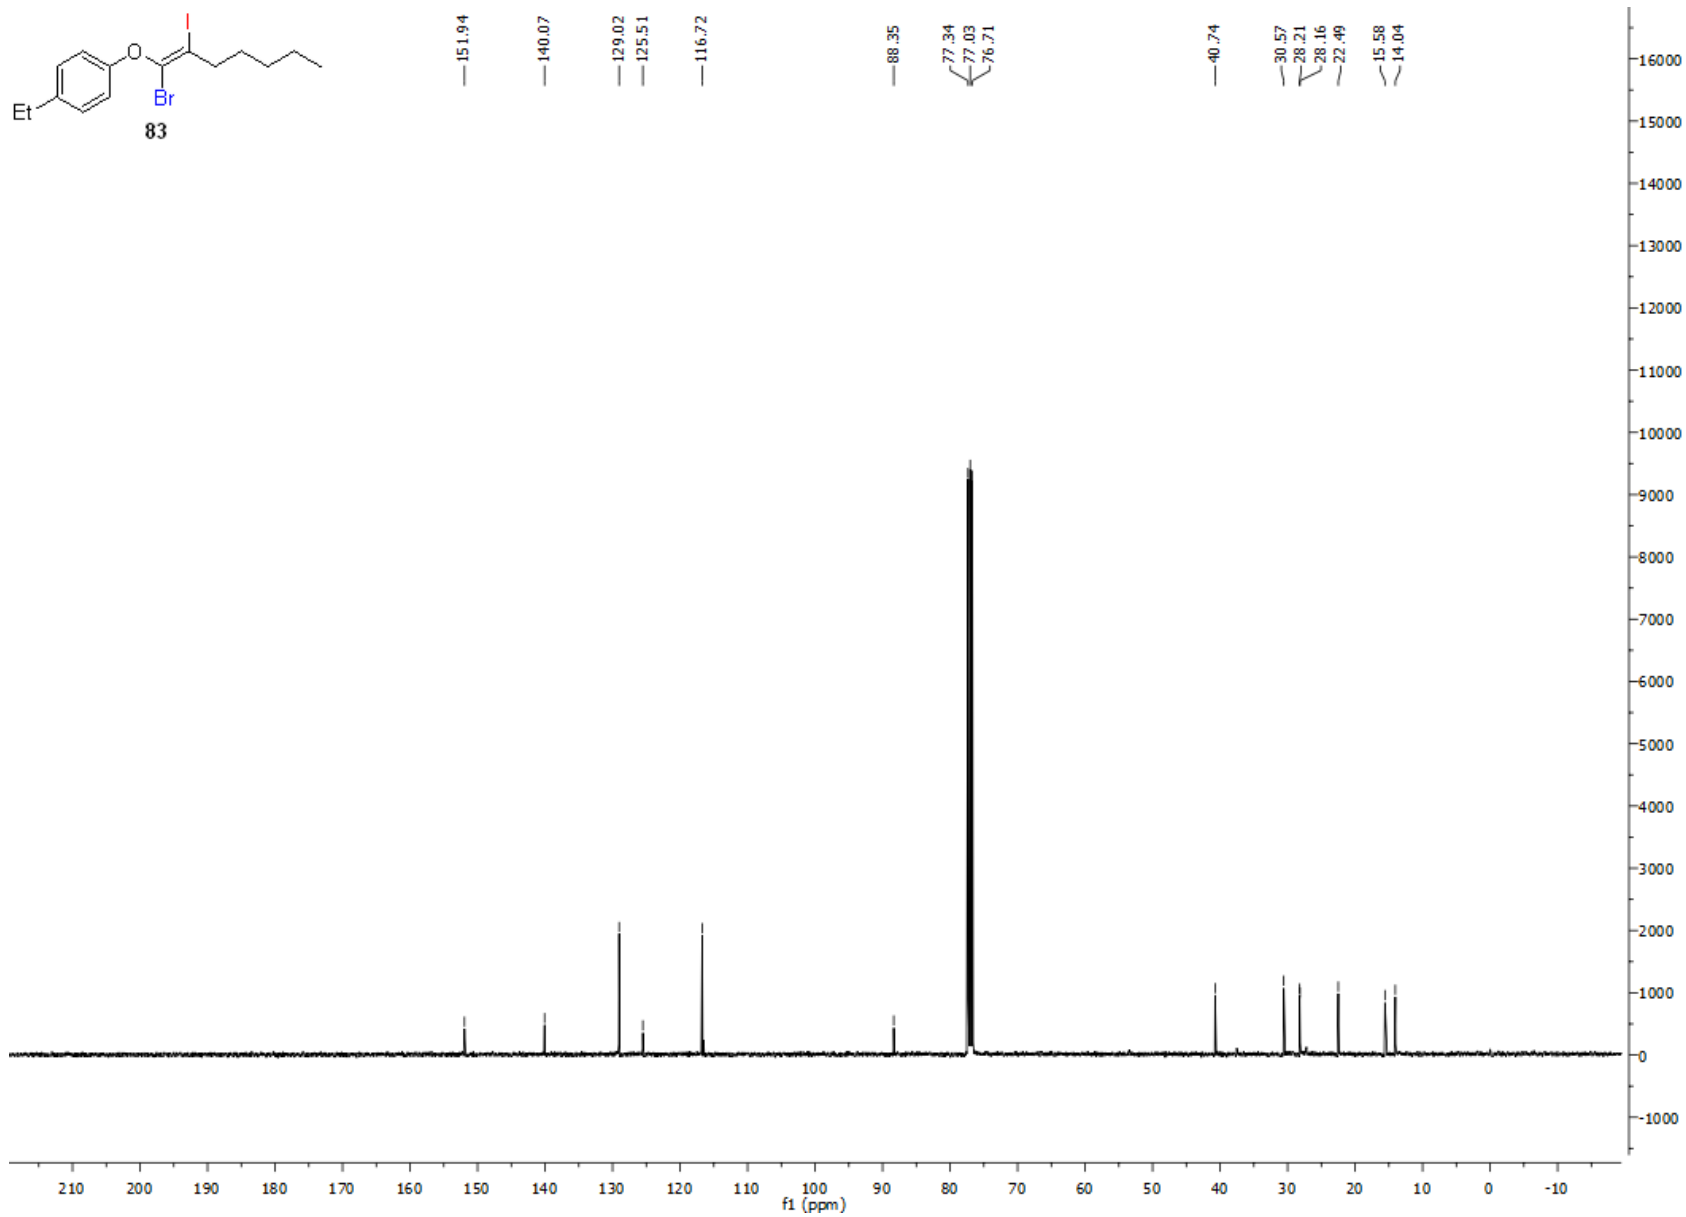

Figure S186. <sup>1</sup>H-NMR of 84

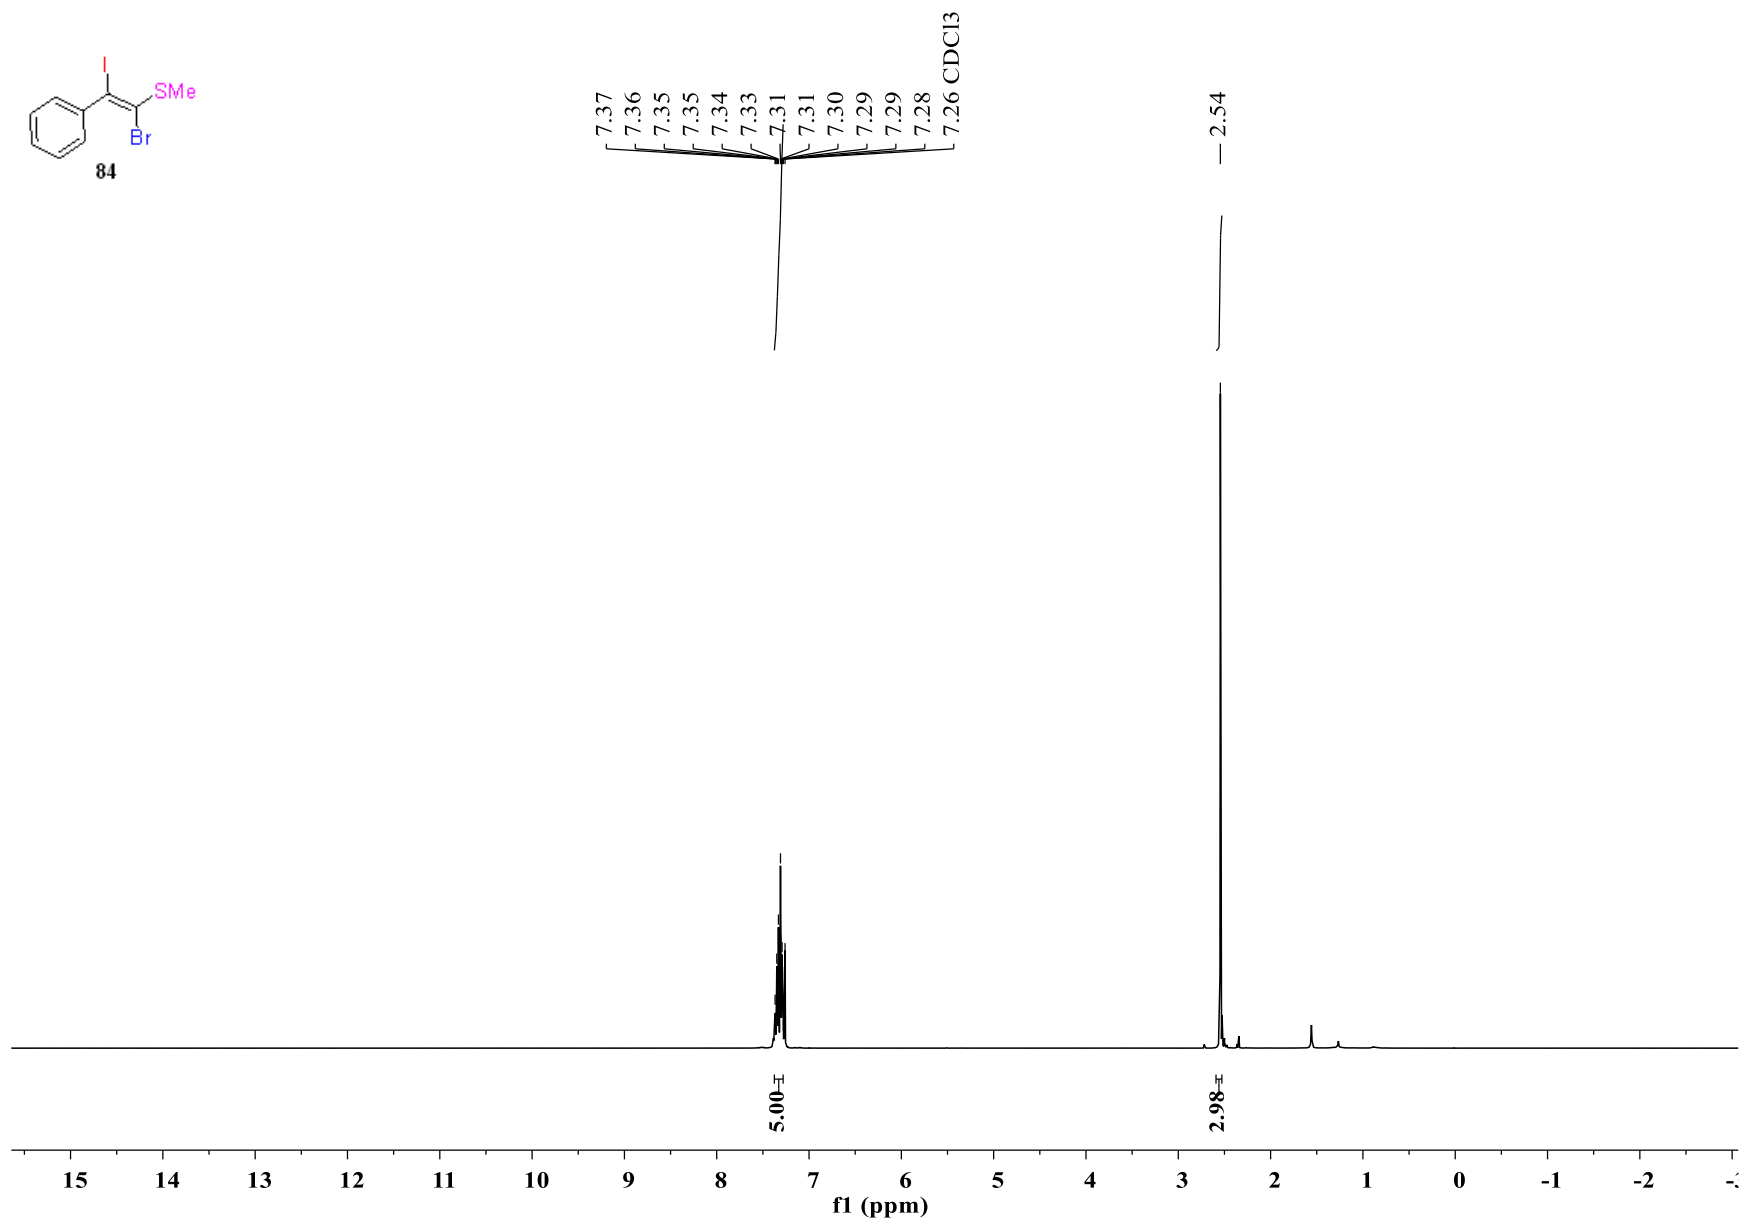



Figure S187.  $^{13}\text{C}$ -NMR of **84**

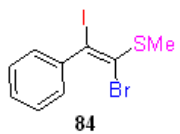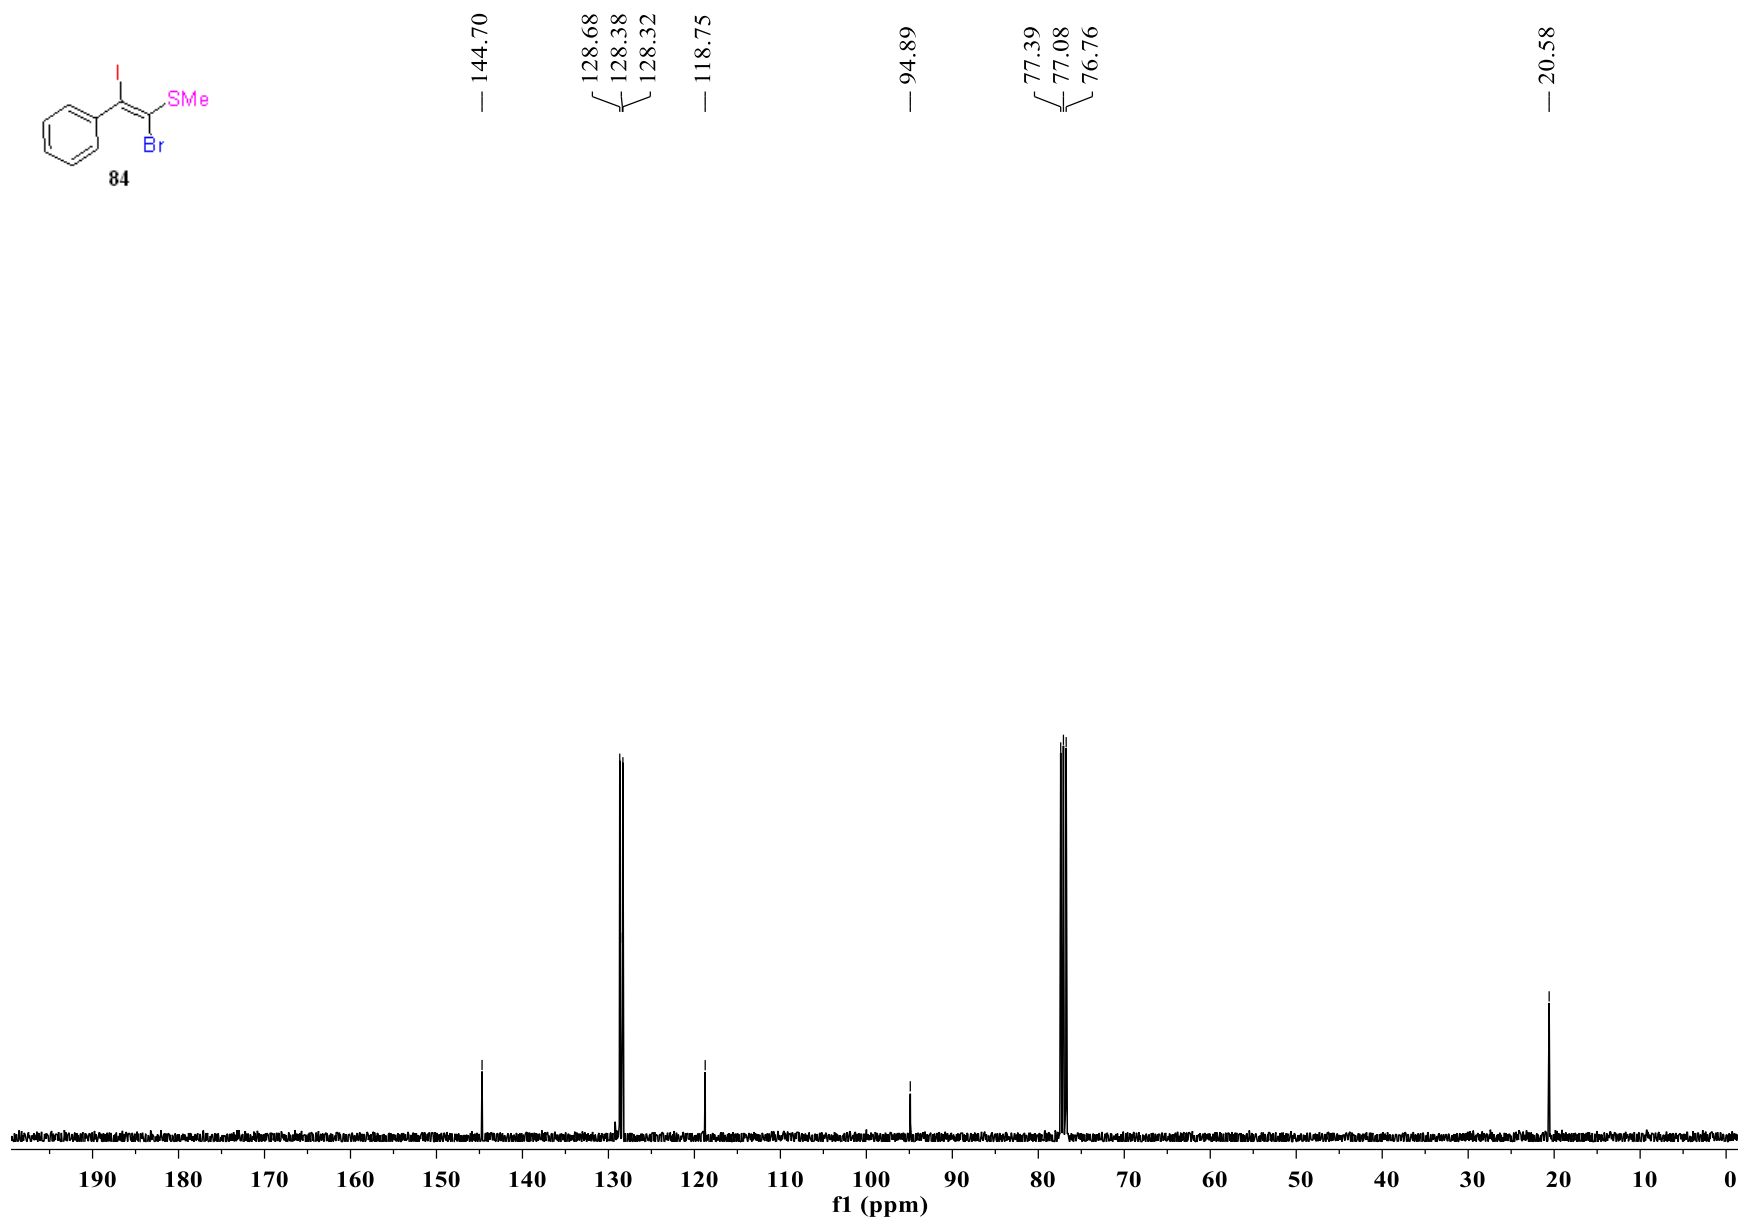

Figure S188. <sup>1</sup>H-NMR of 85

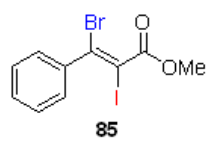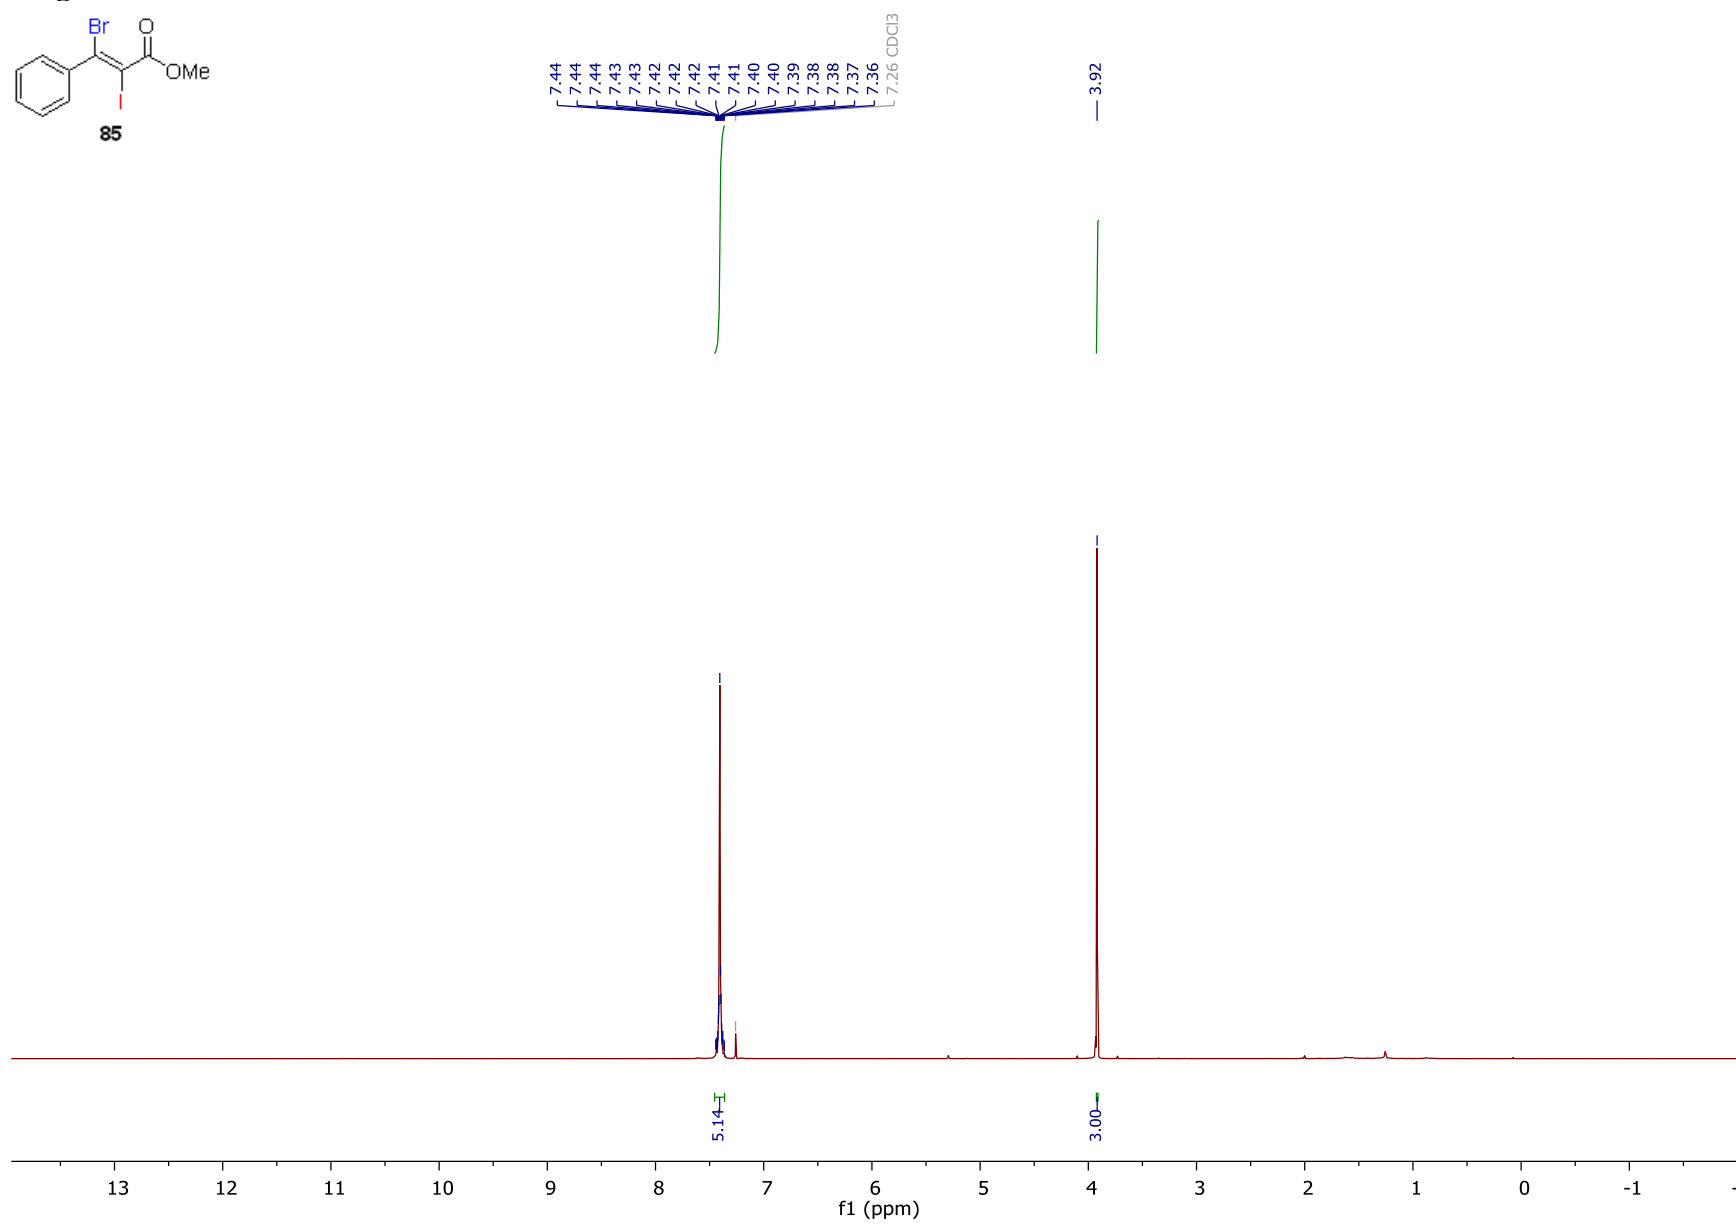

Figure S189.  $^{13}\text{C}$ -NMR of **85**

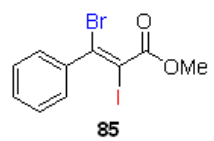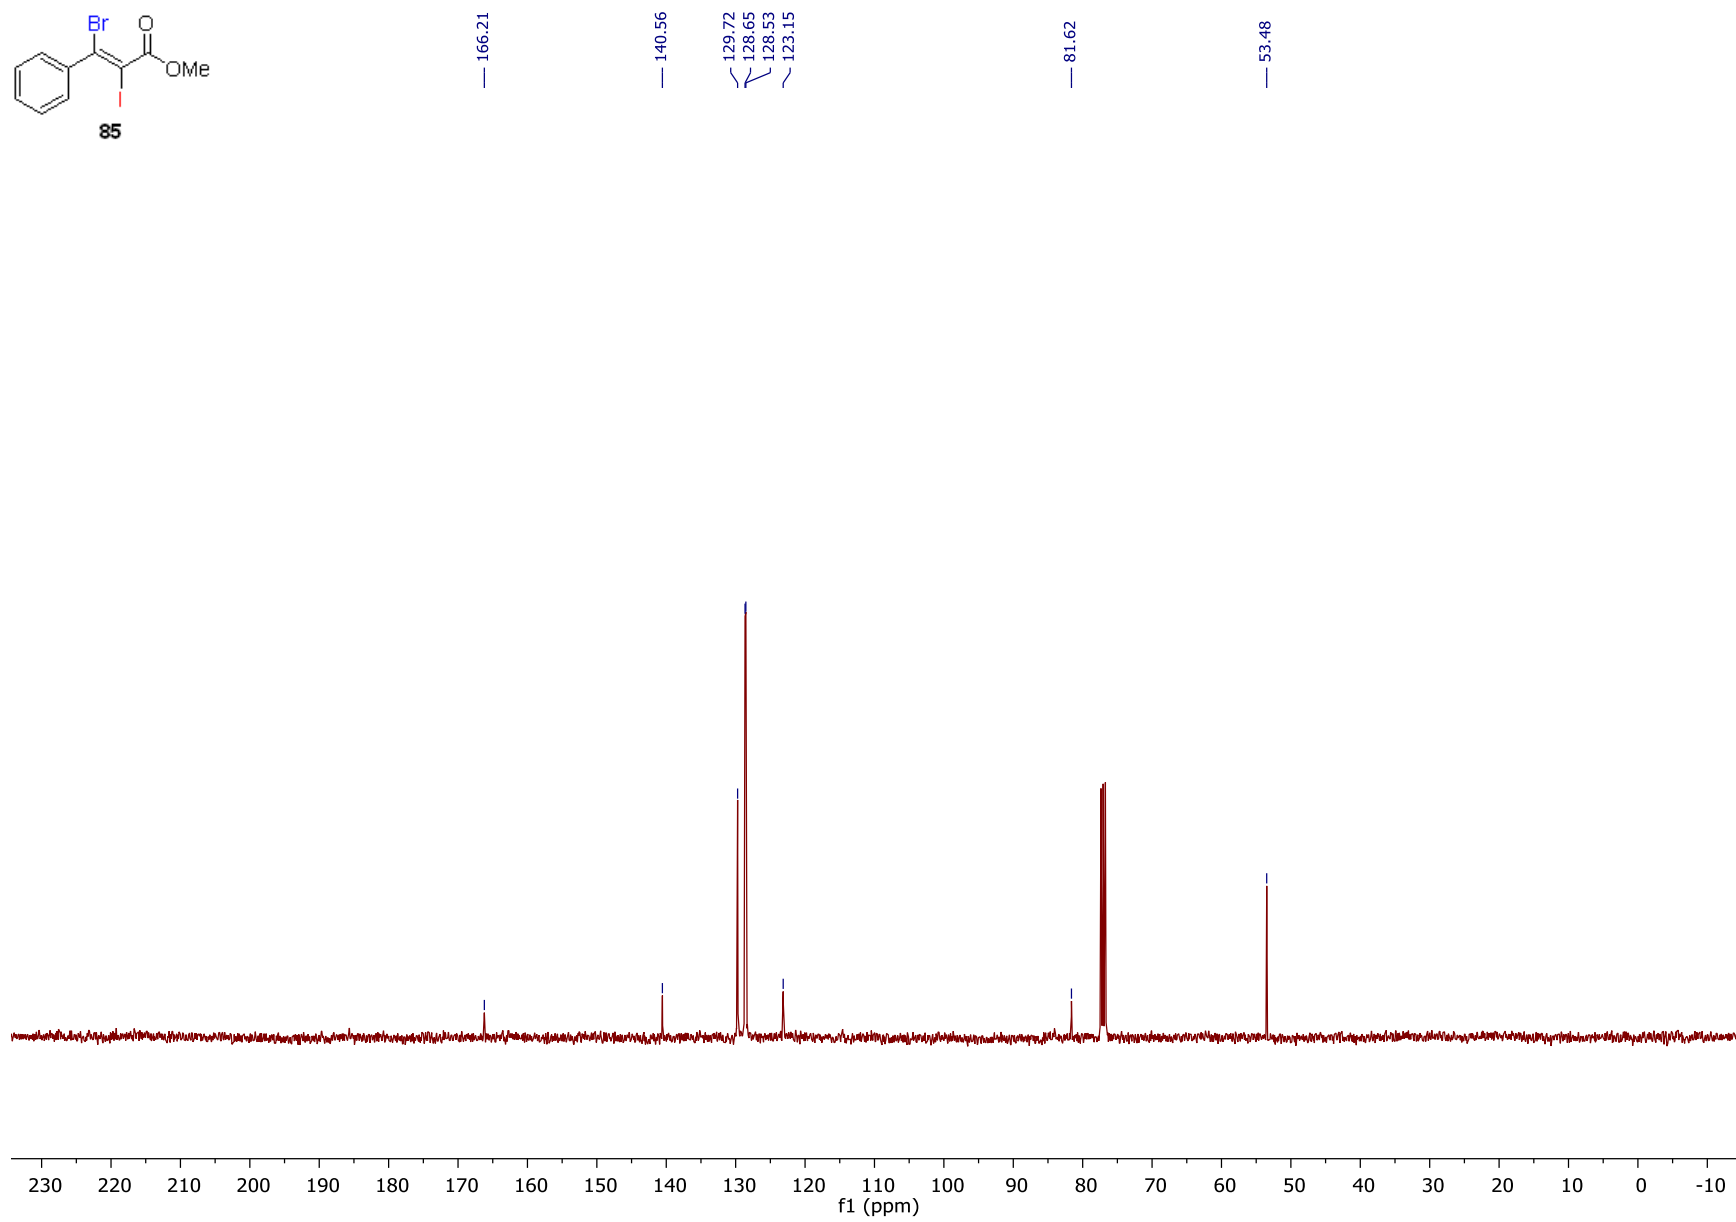

Figure S190. <sup>1</sup>H-NMR of 86

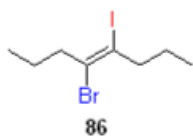

—7.27

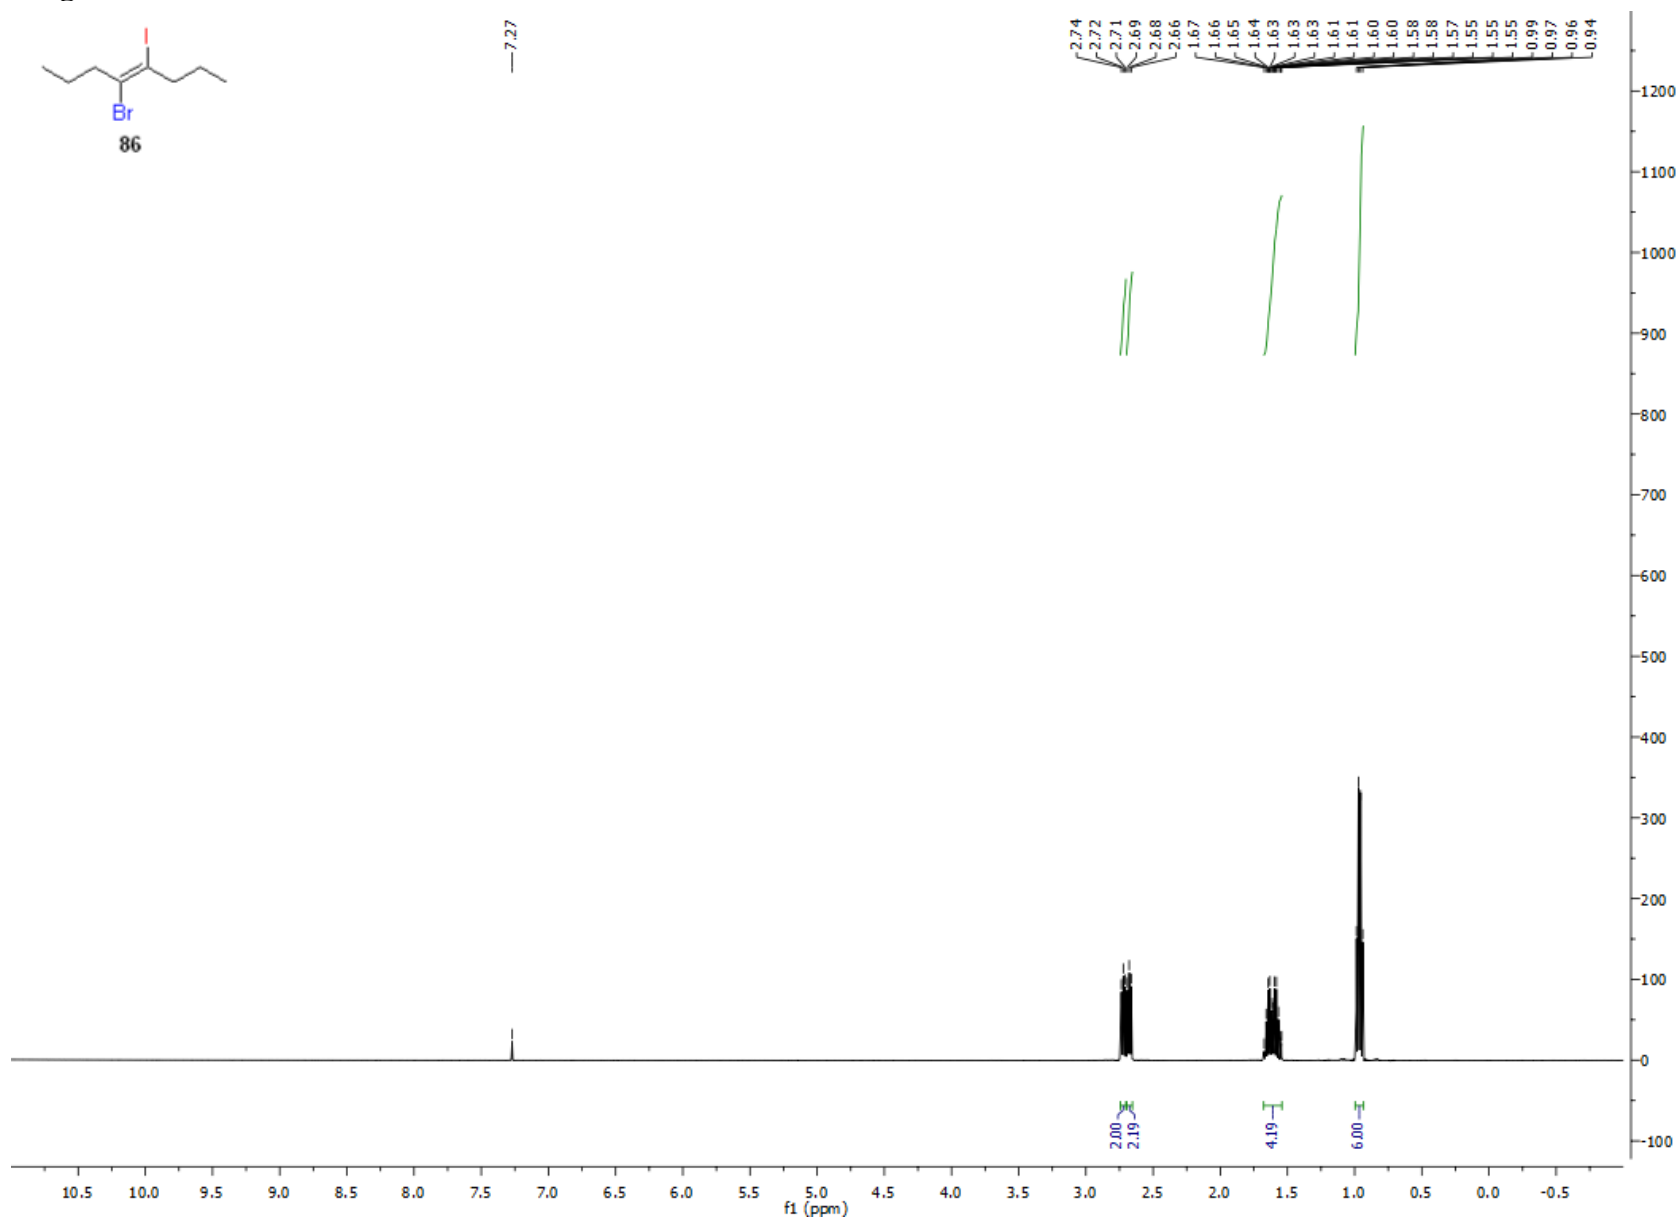

Figure S191.  $^{13}\text{C}$ -NMR of 86

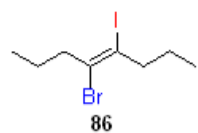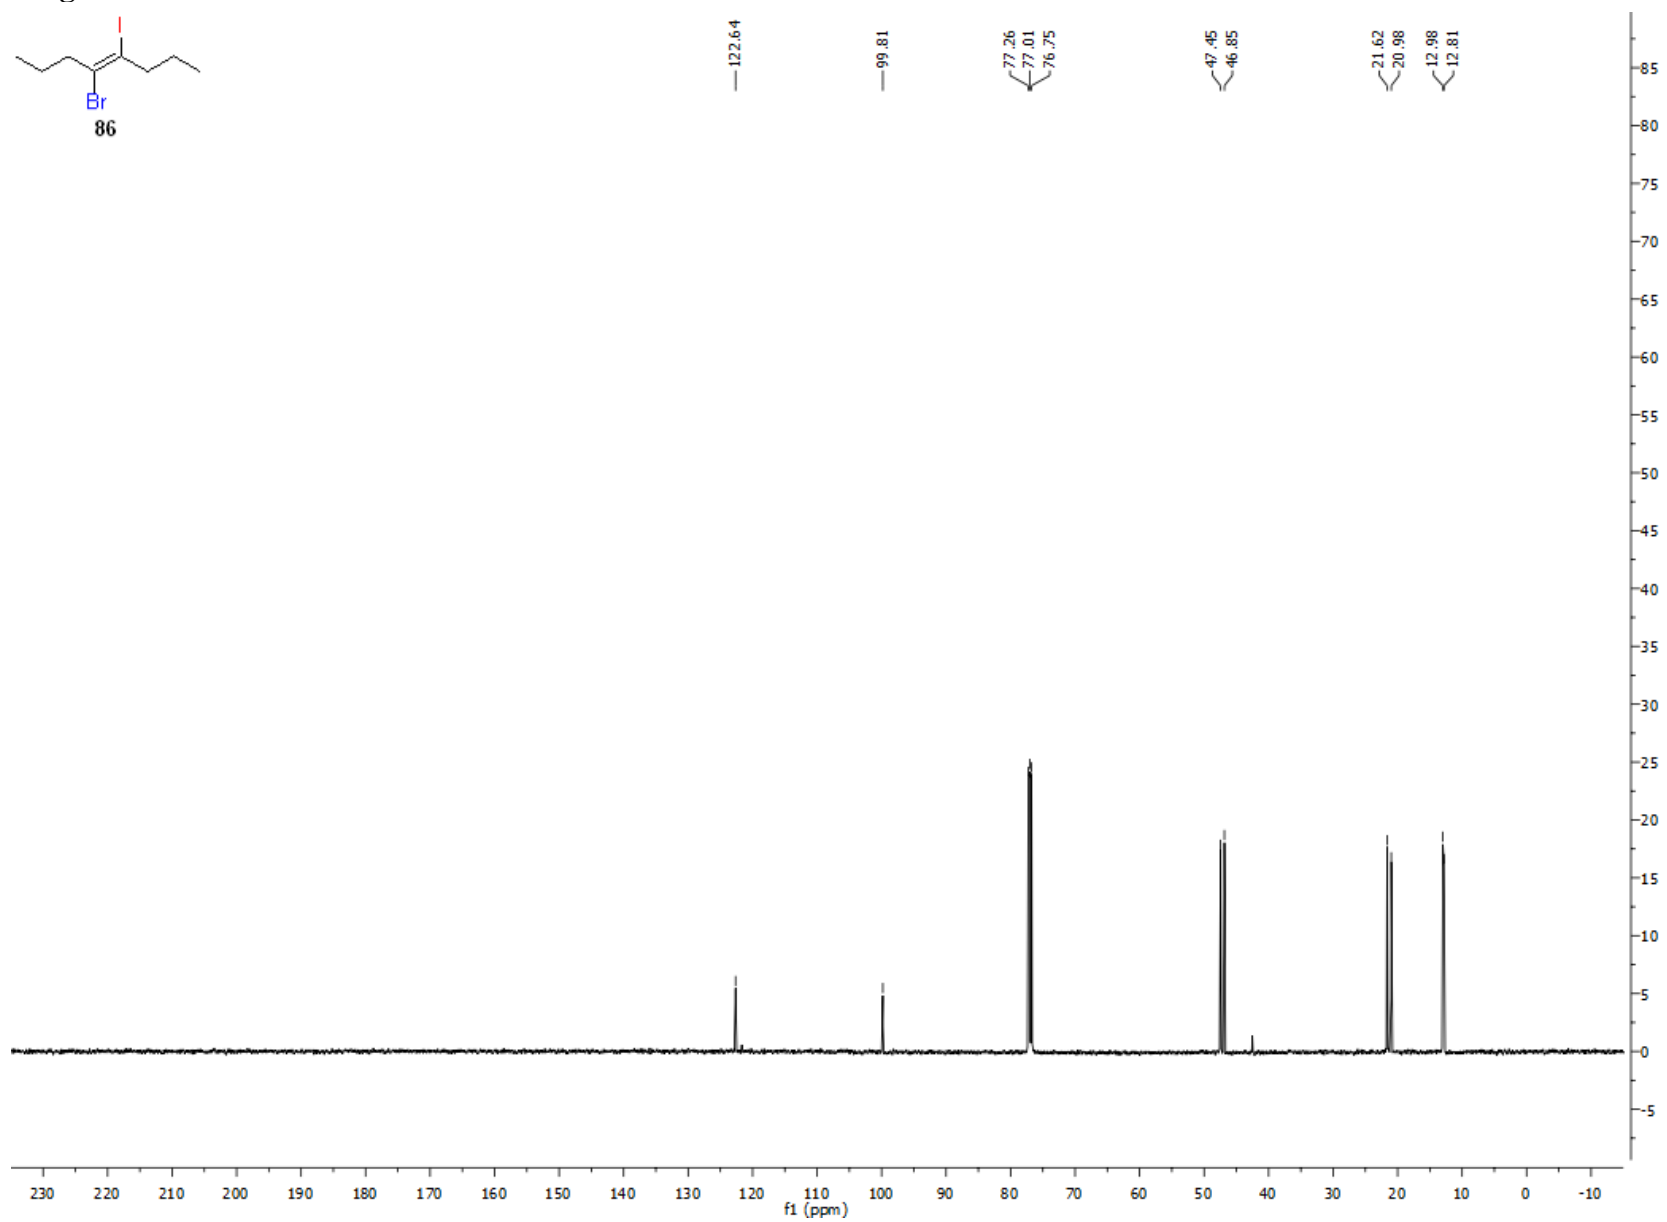

Figure S192. <sup>1</sup>H-NMR of 87

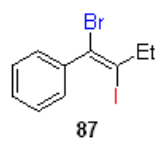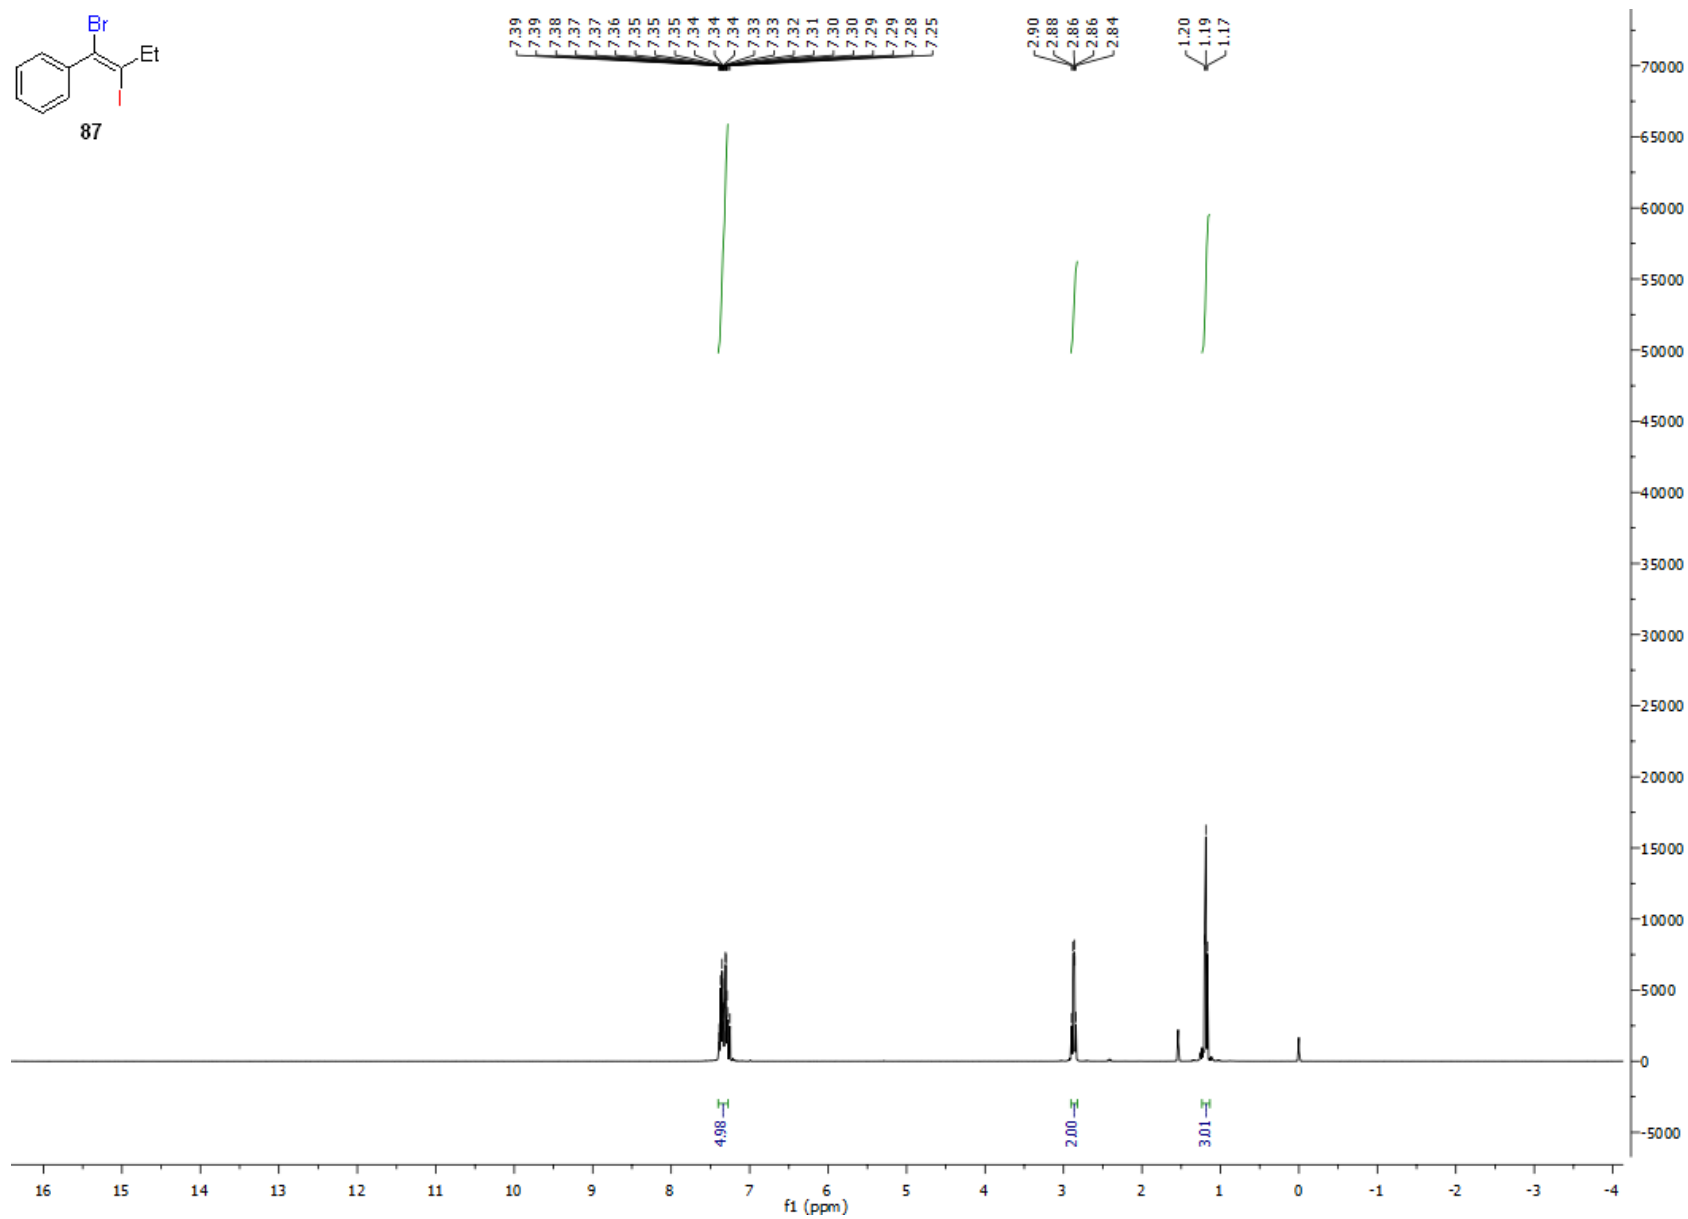

Figure S193.  $^{13}\text{C}$ -NMR of 87

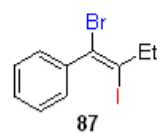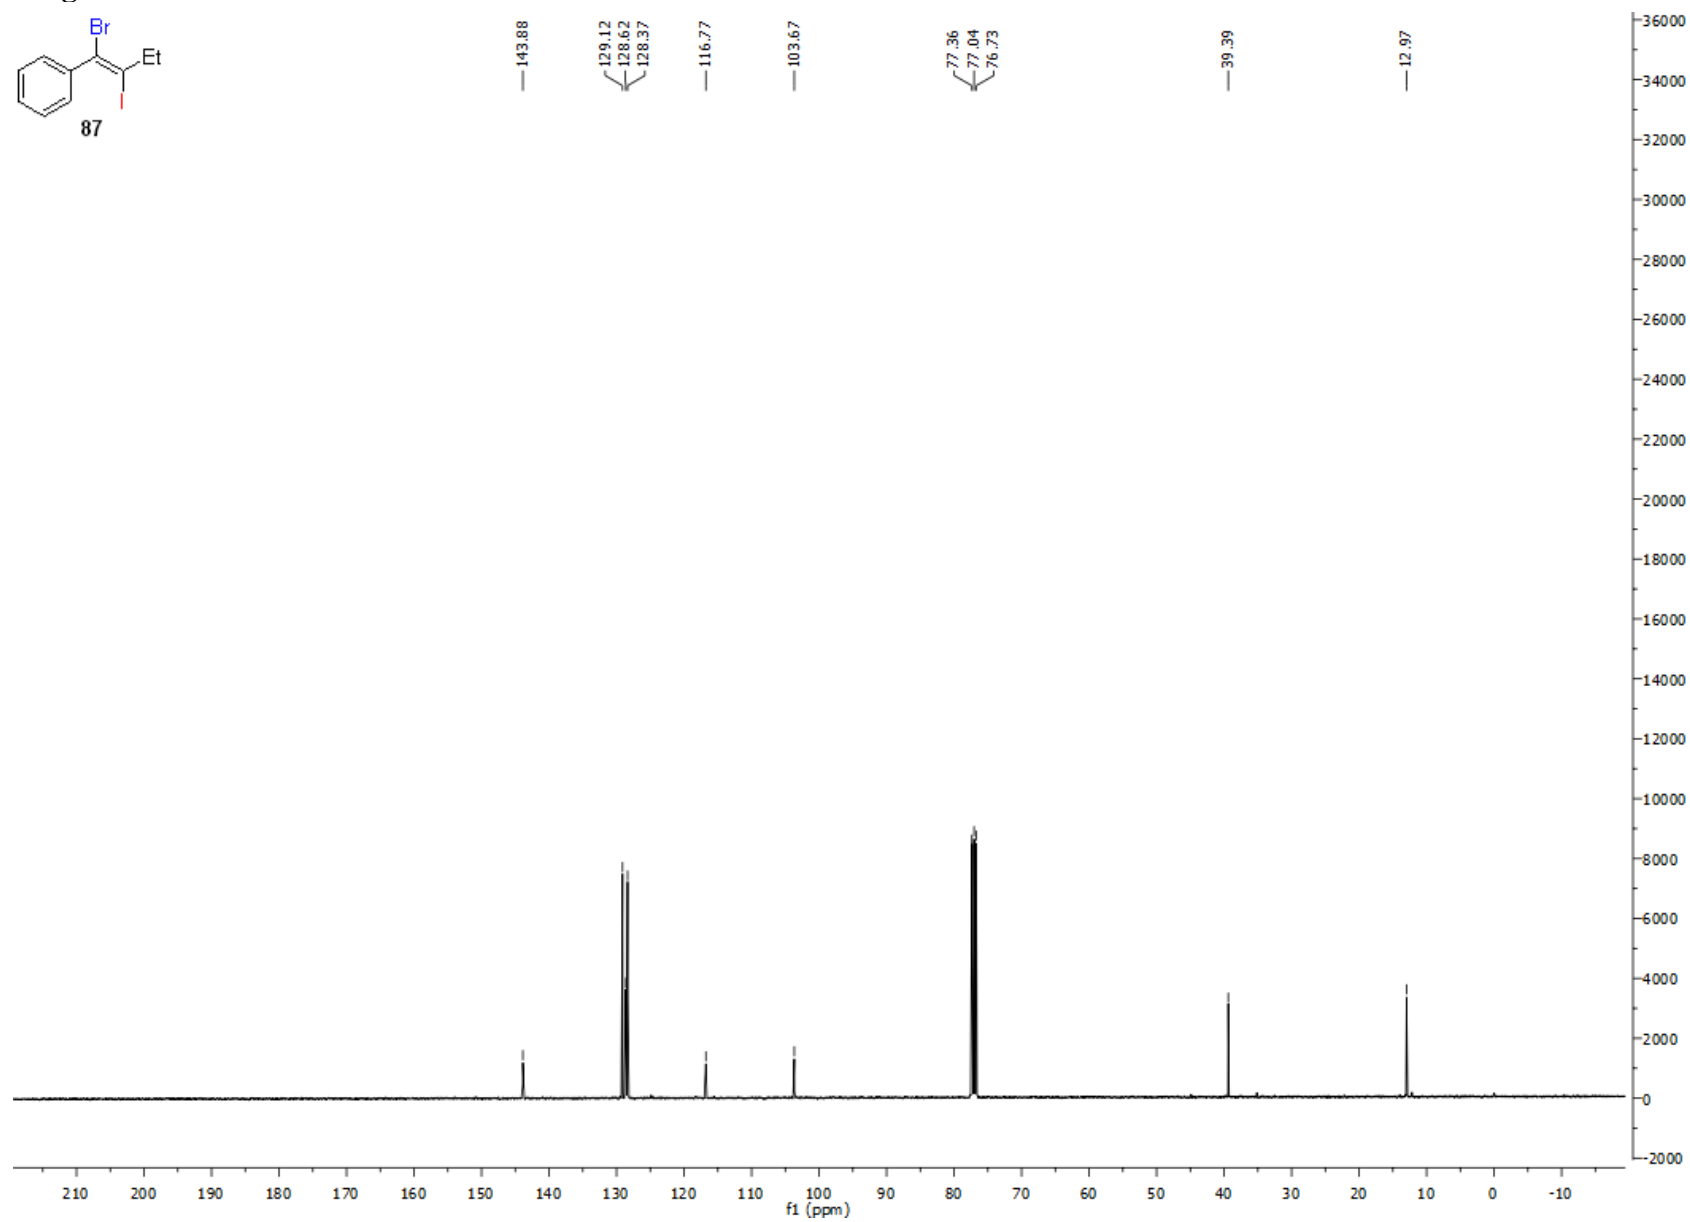

Figure S194. <sup>1</sup>H-NMR of 88

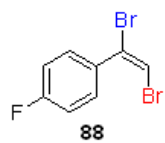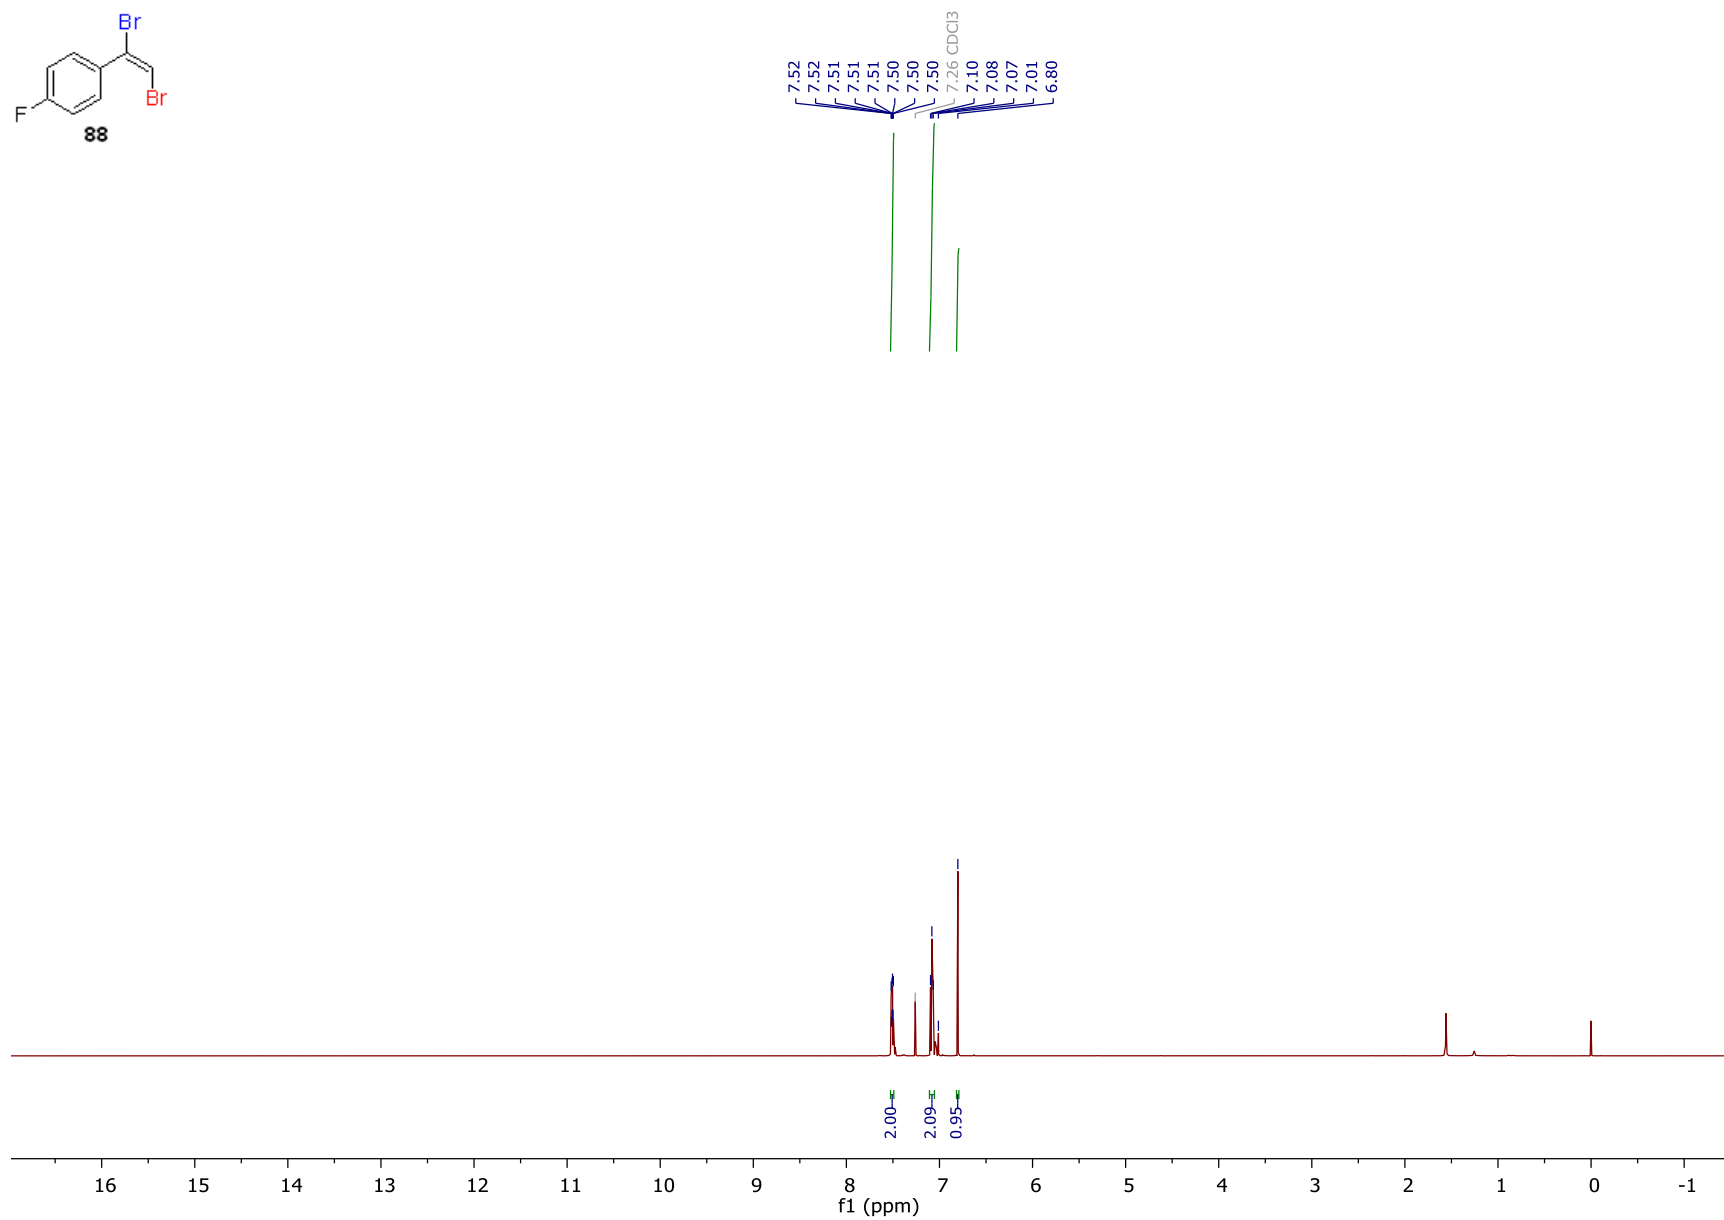



Figure S195.  $^{13}\text{C}$ -NMR of **88**

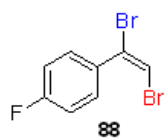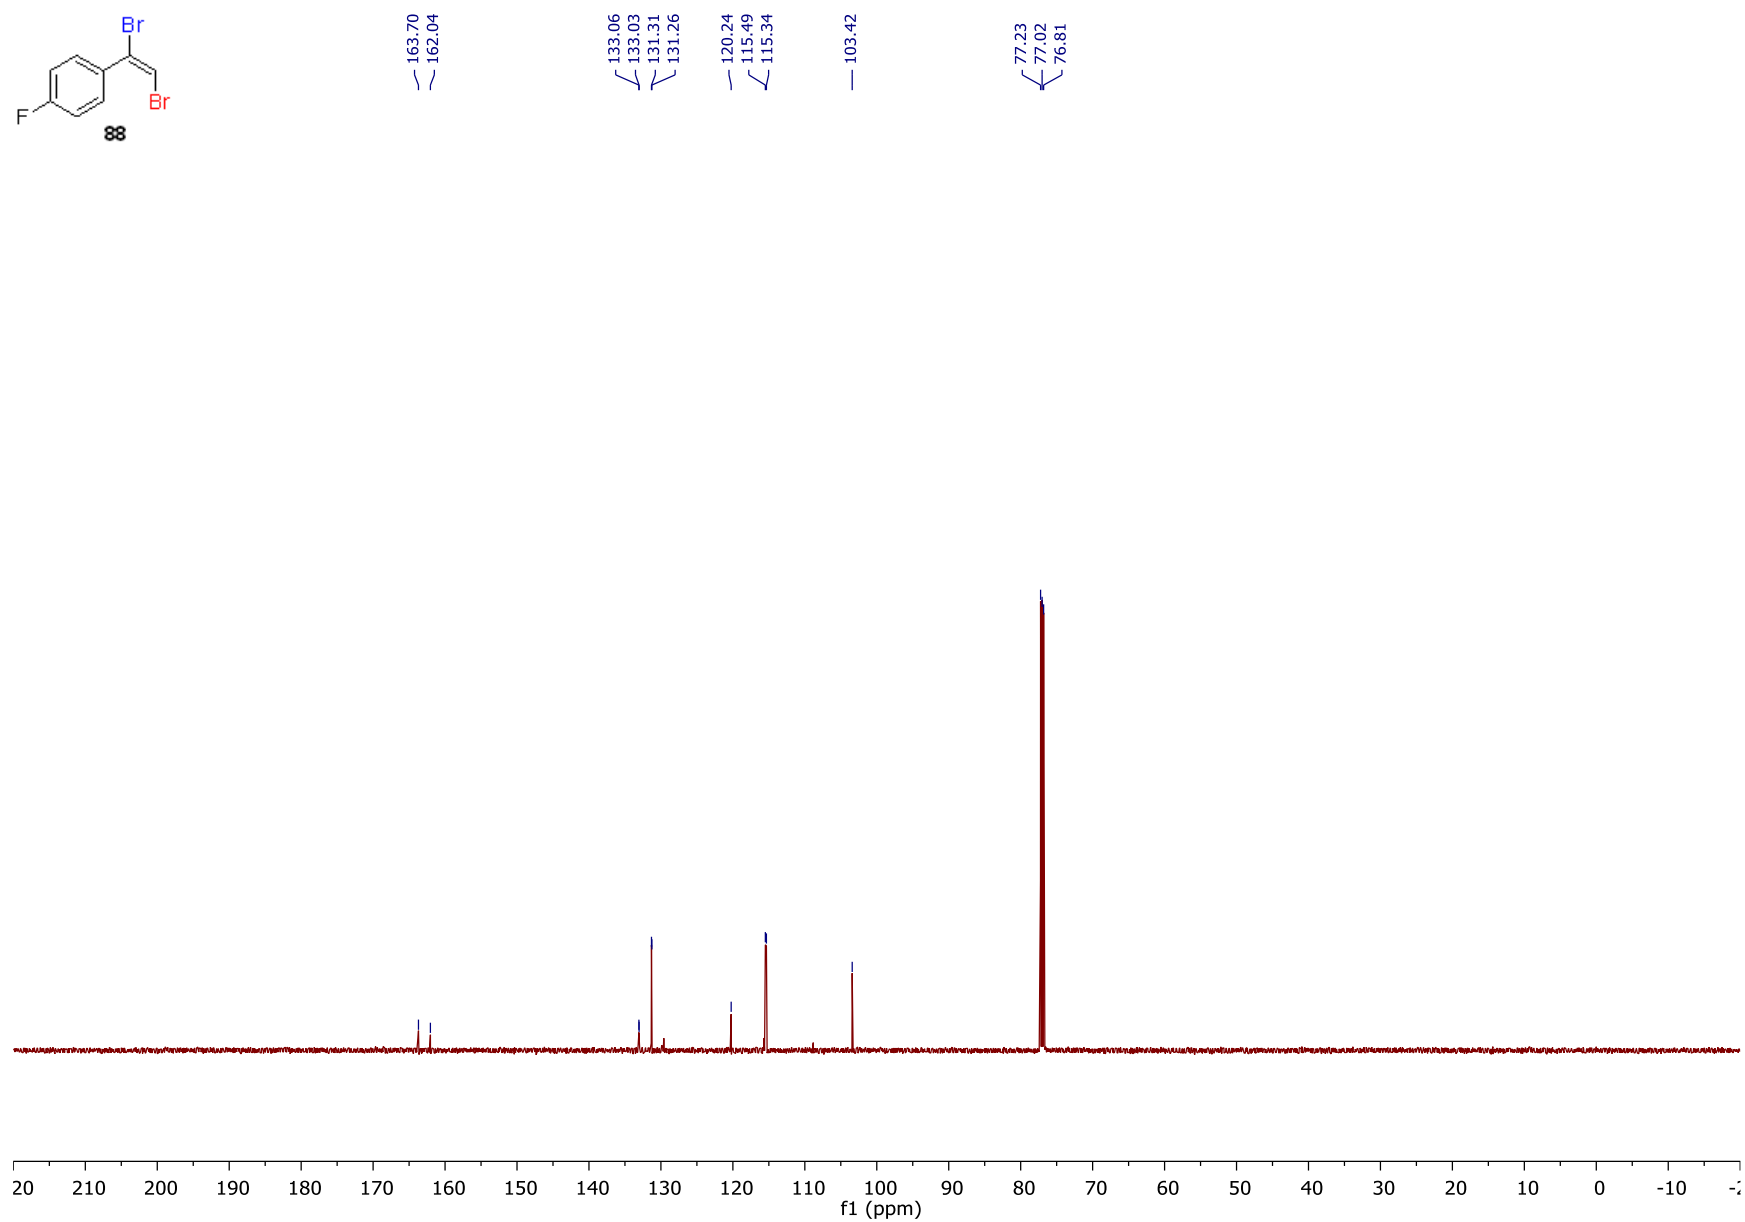

Figure S196. <sup>1</sup>H-NMR of 89

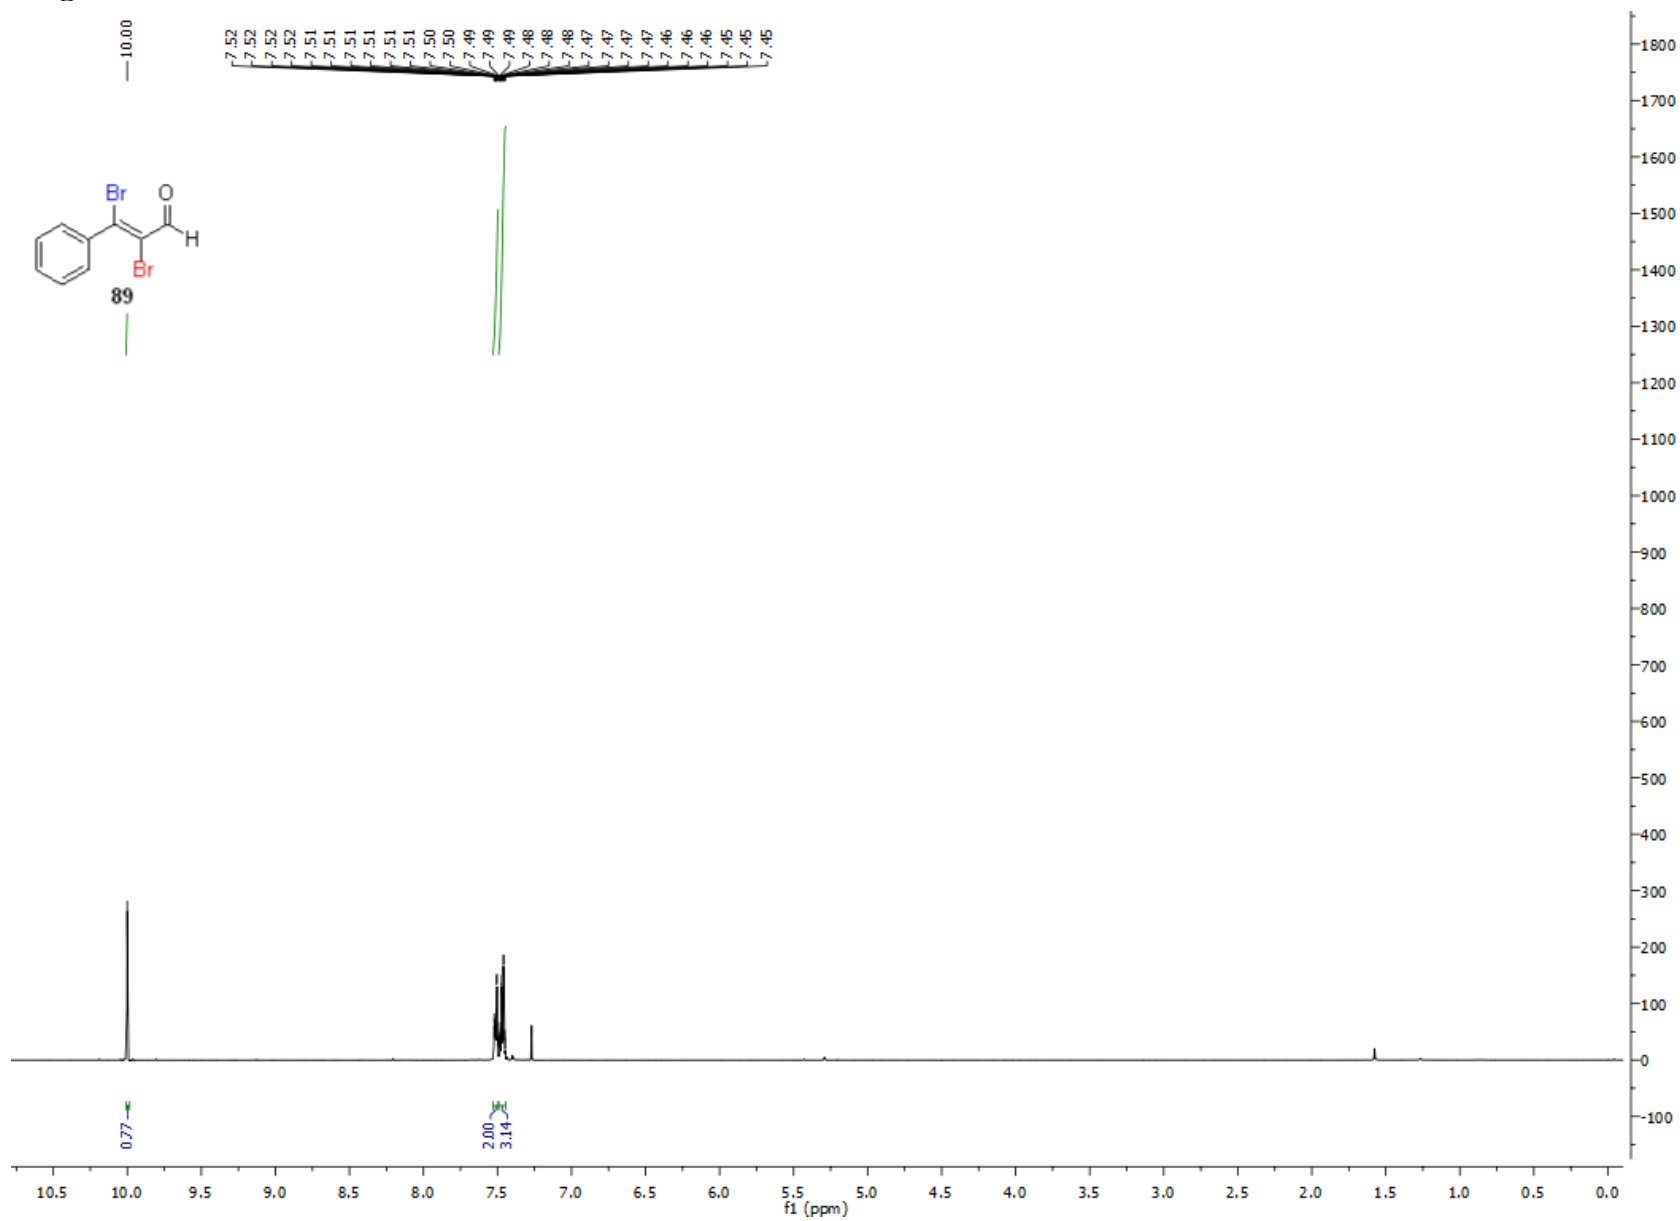

Figure S197.  $^{13}\text{C}$ -NMR of **89**

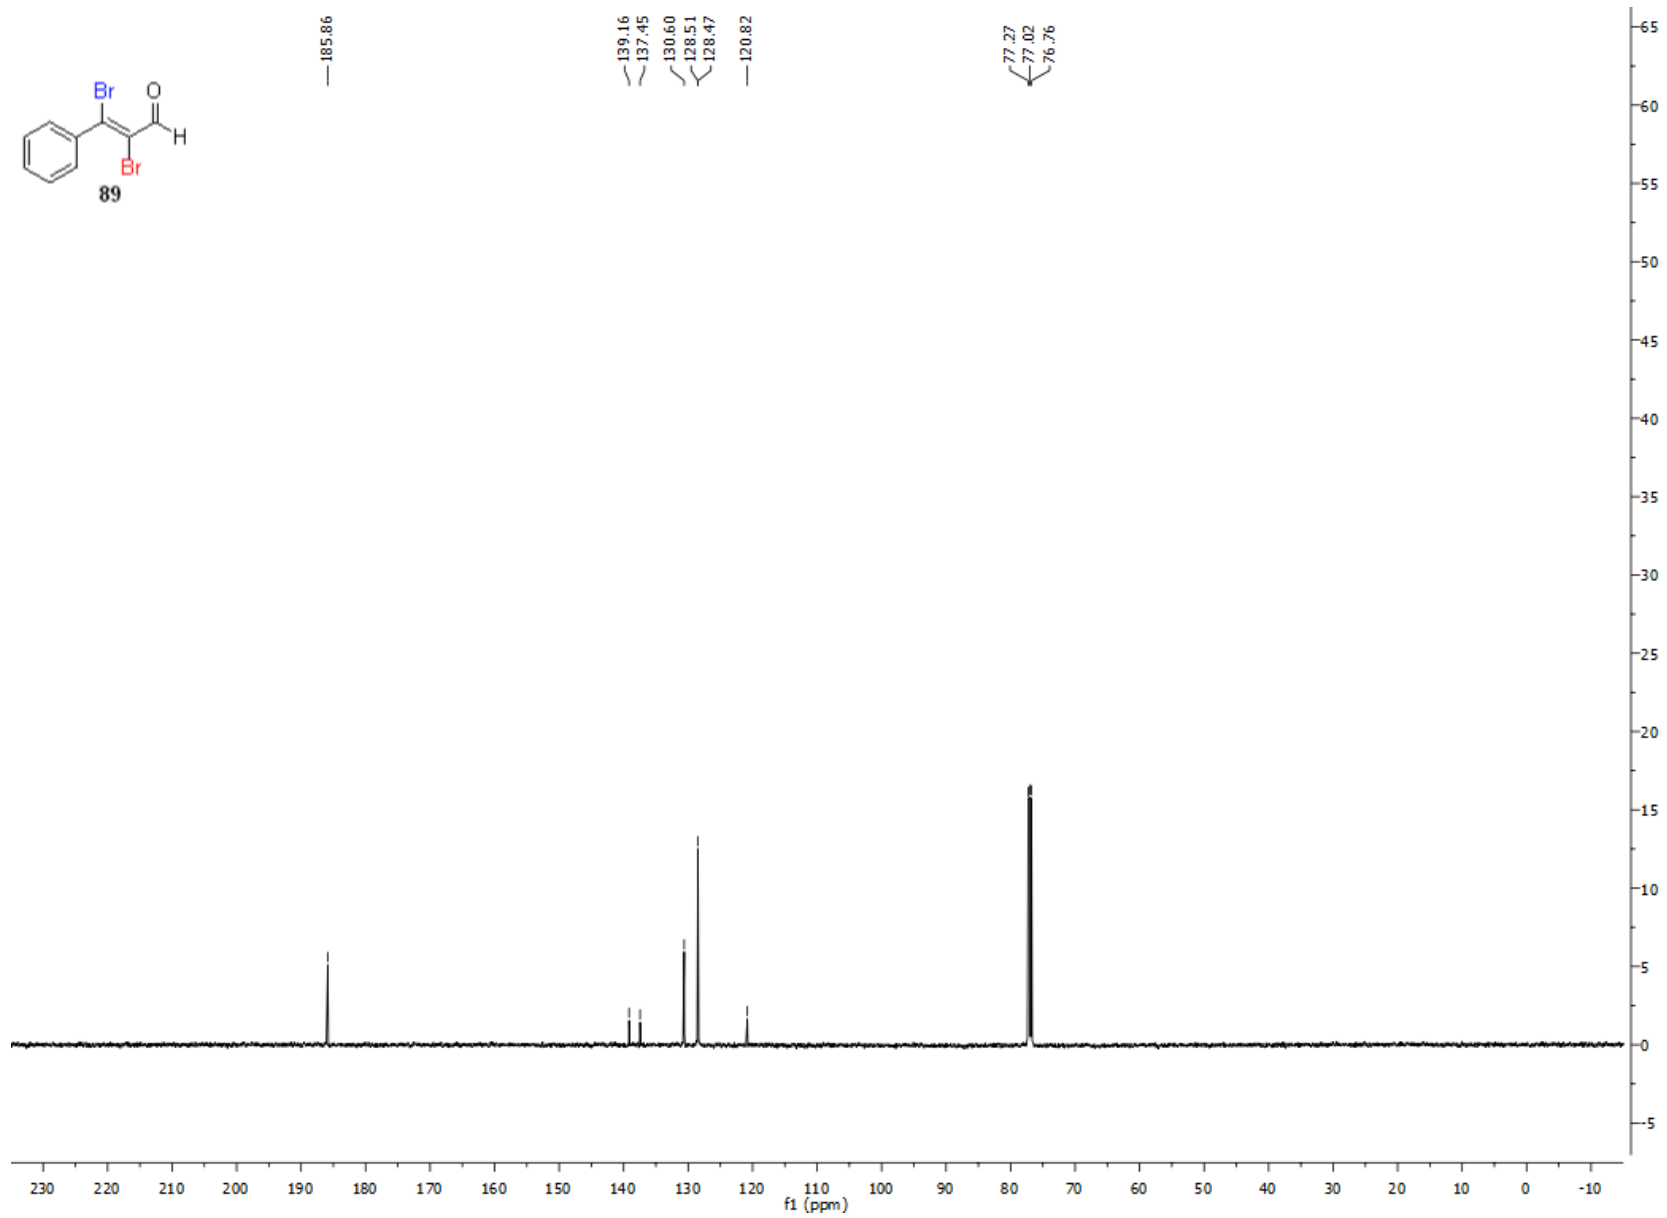

Figure S198. <sup>1</sup>H-NMR of 90

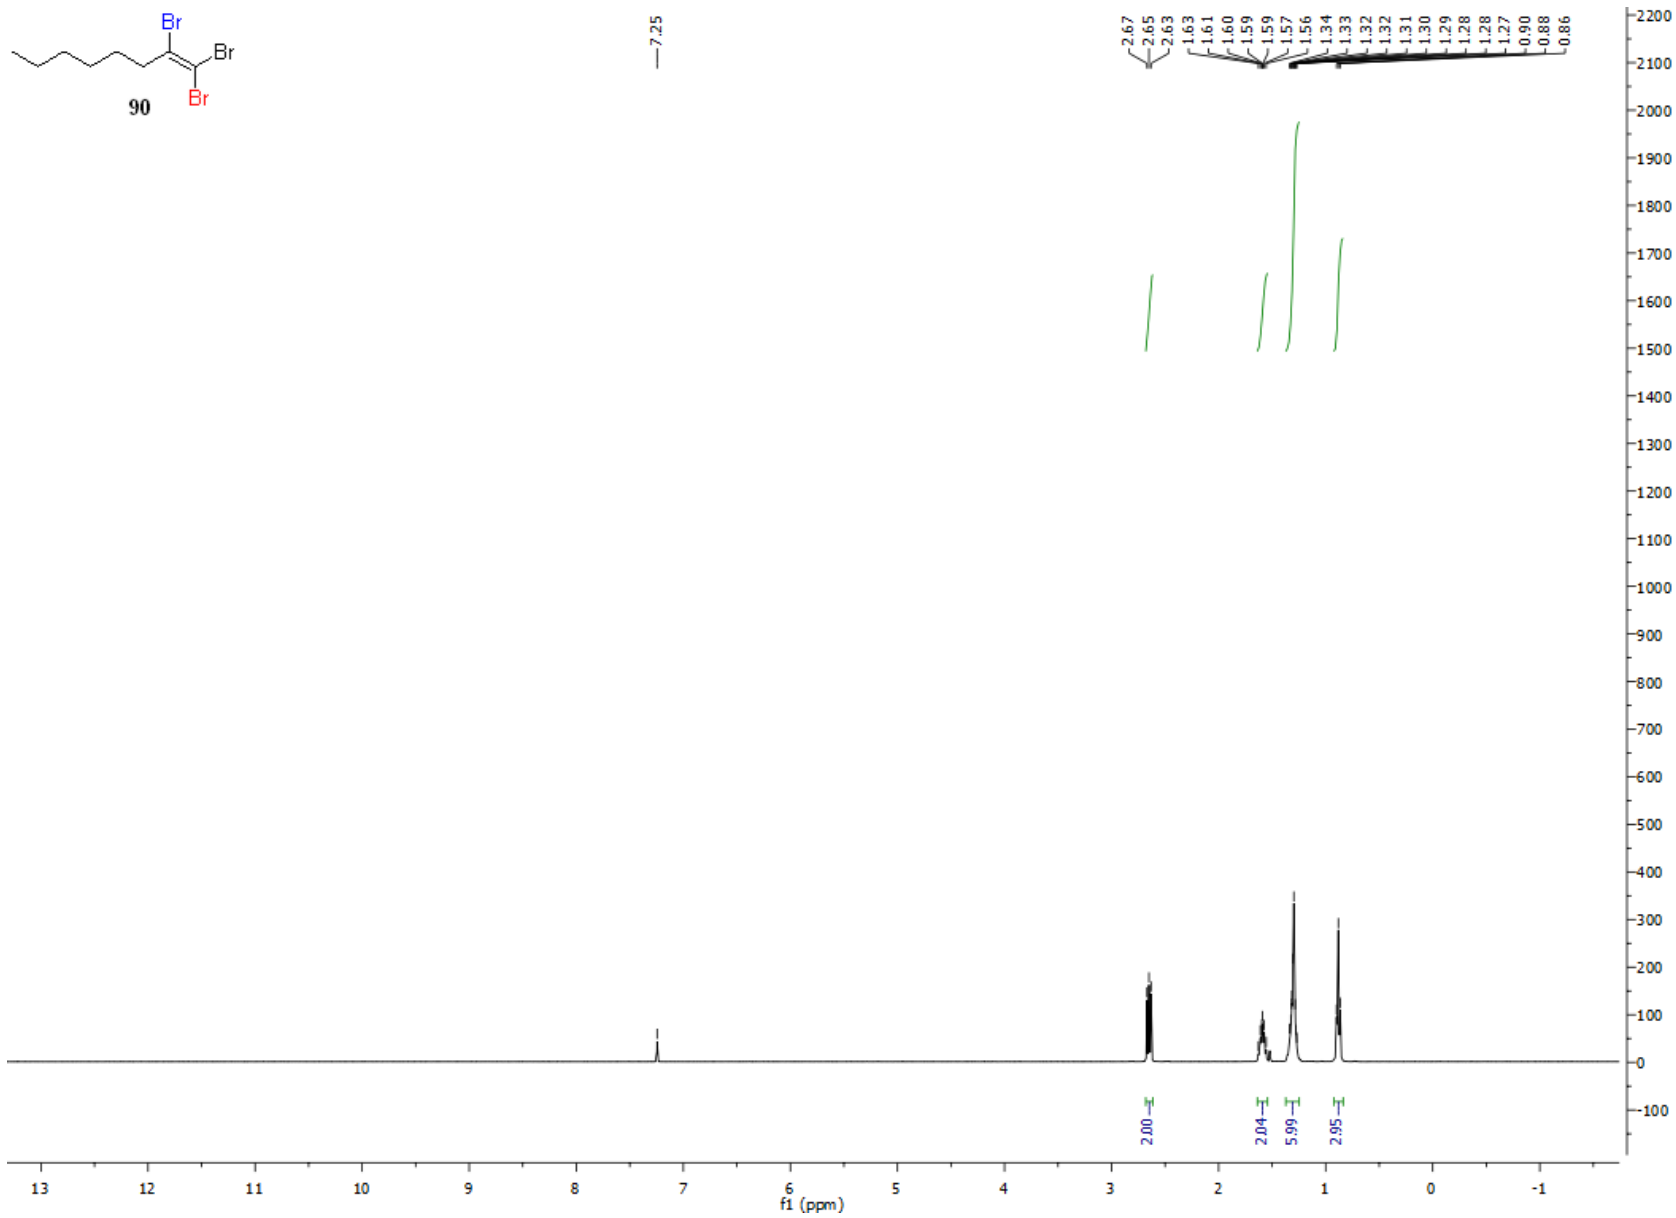

Figure S199.  $^{13}\text{C}$ -NMR of **90**

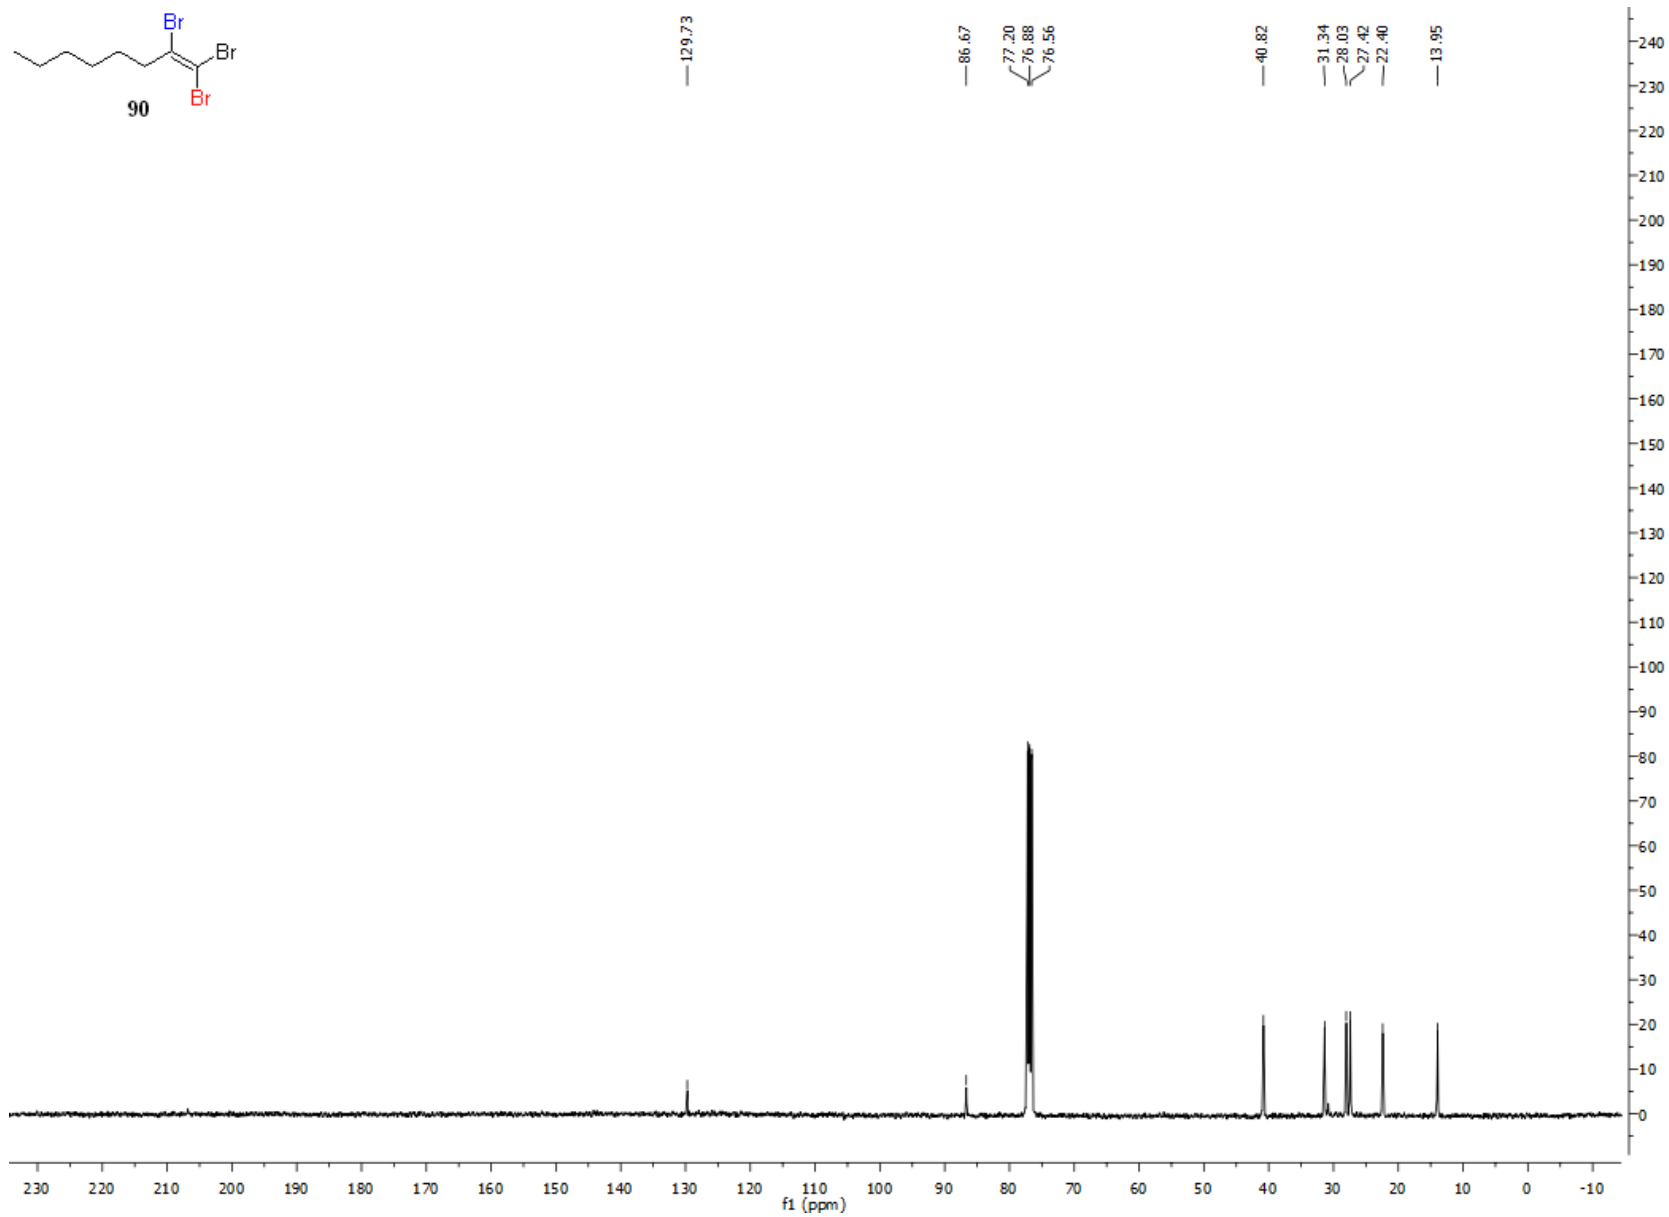

Figure S200. <sup>1</sup>H-NMR of 91

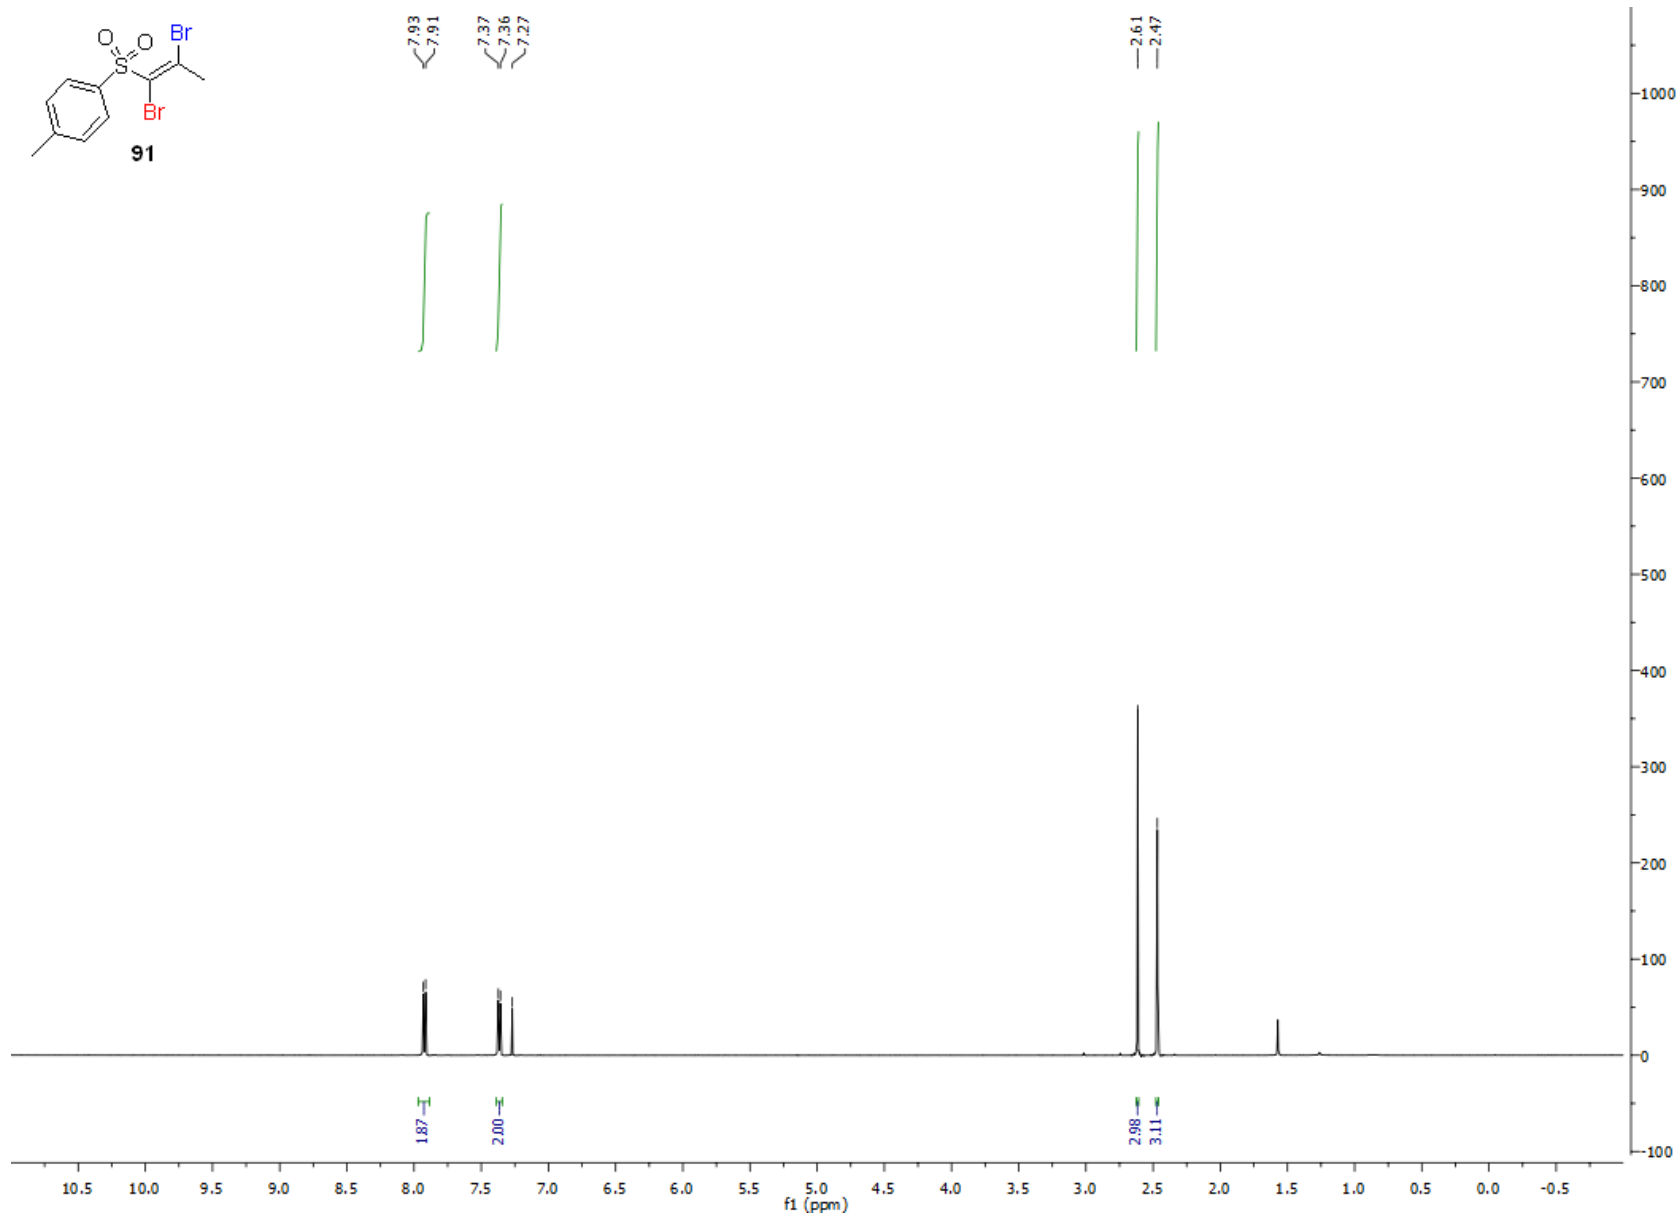

Figure S201.  $^{13}\text{C}$ -NMR of **91**

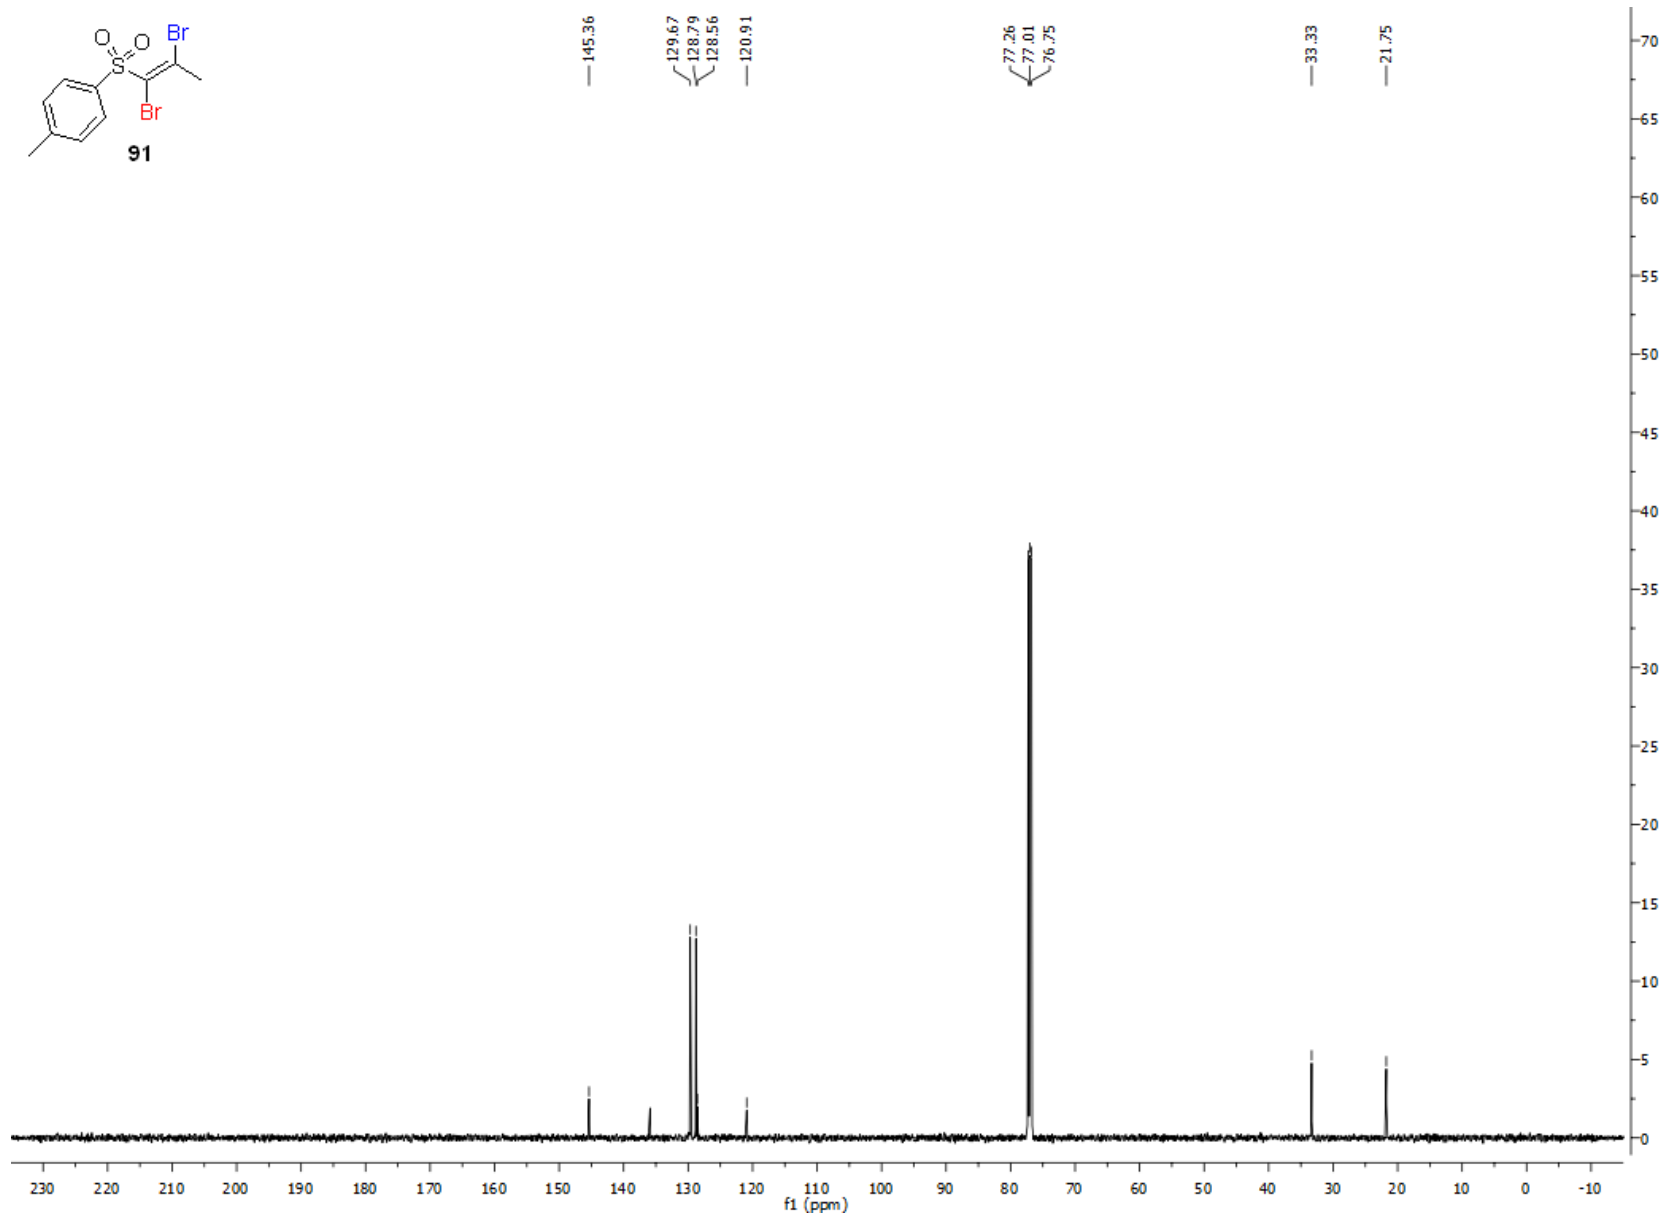

Figure S202. <sup>1</sup>H-NMR of 92

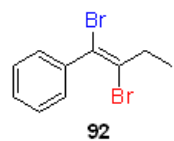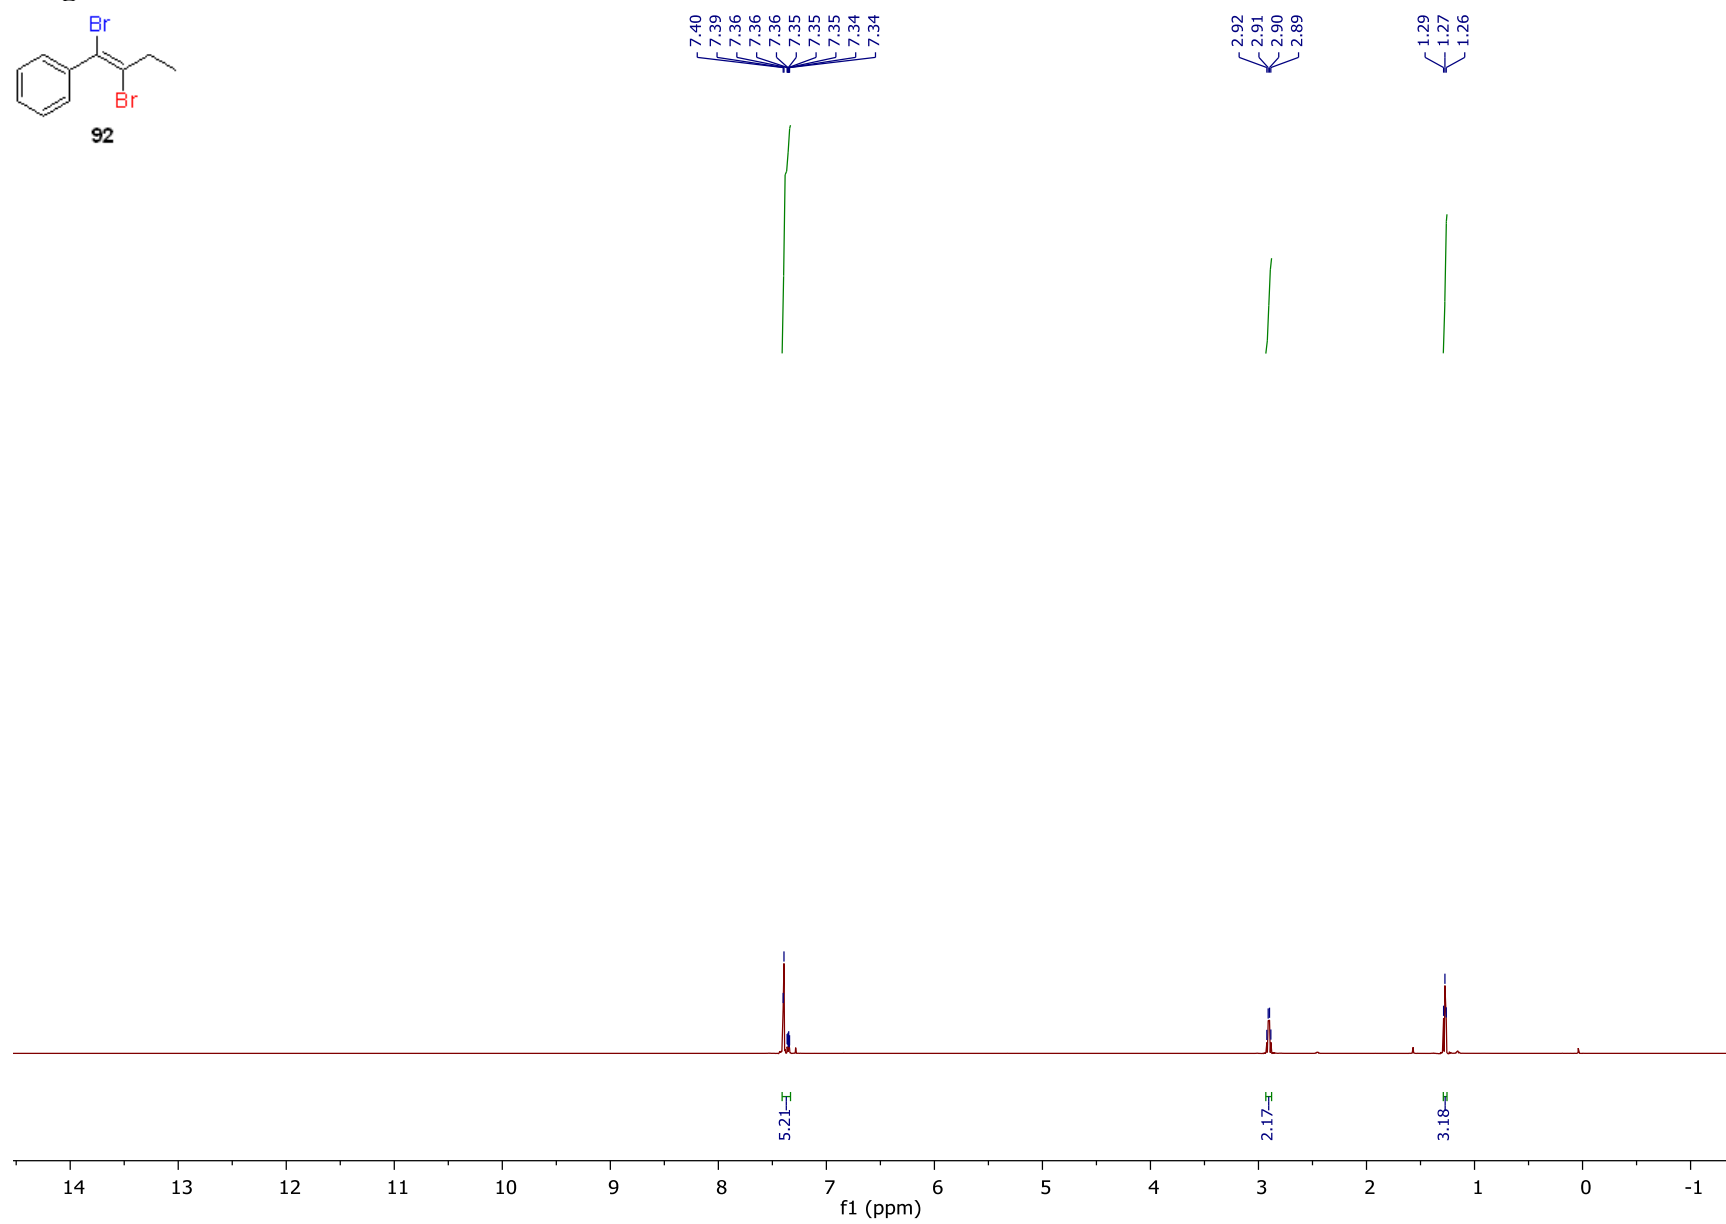



Figure S203.  $^{13}\text{C}$ -NMR of **92**

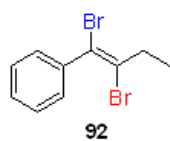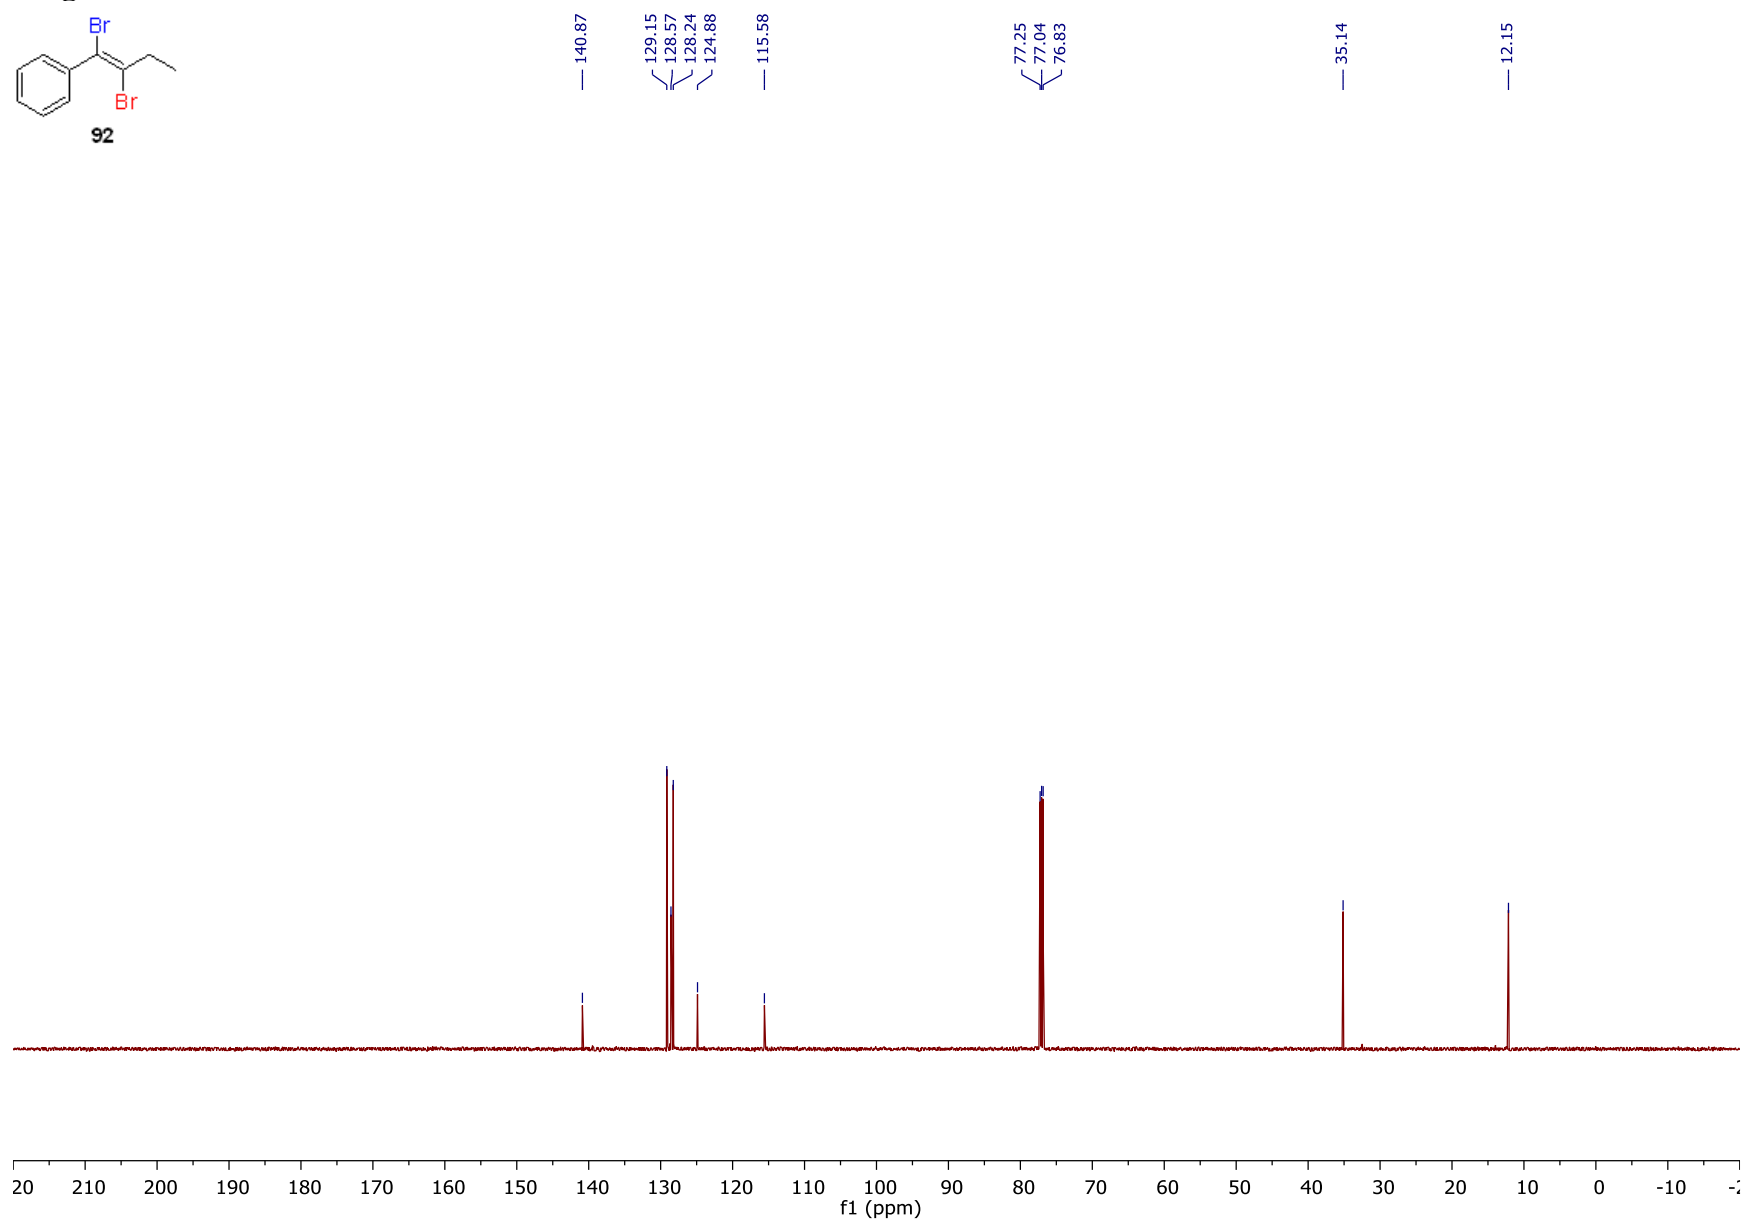



Figure S205.  $^{13}\text{C}$ -NMR of **93**

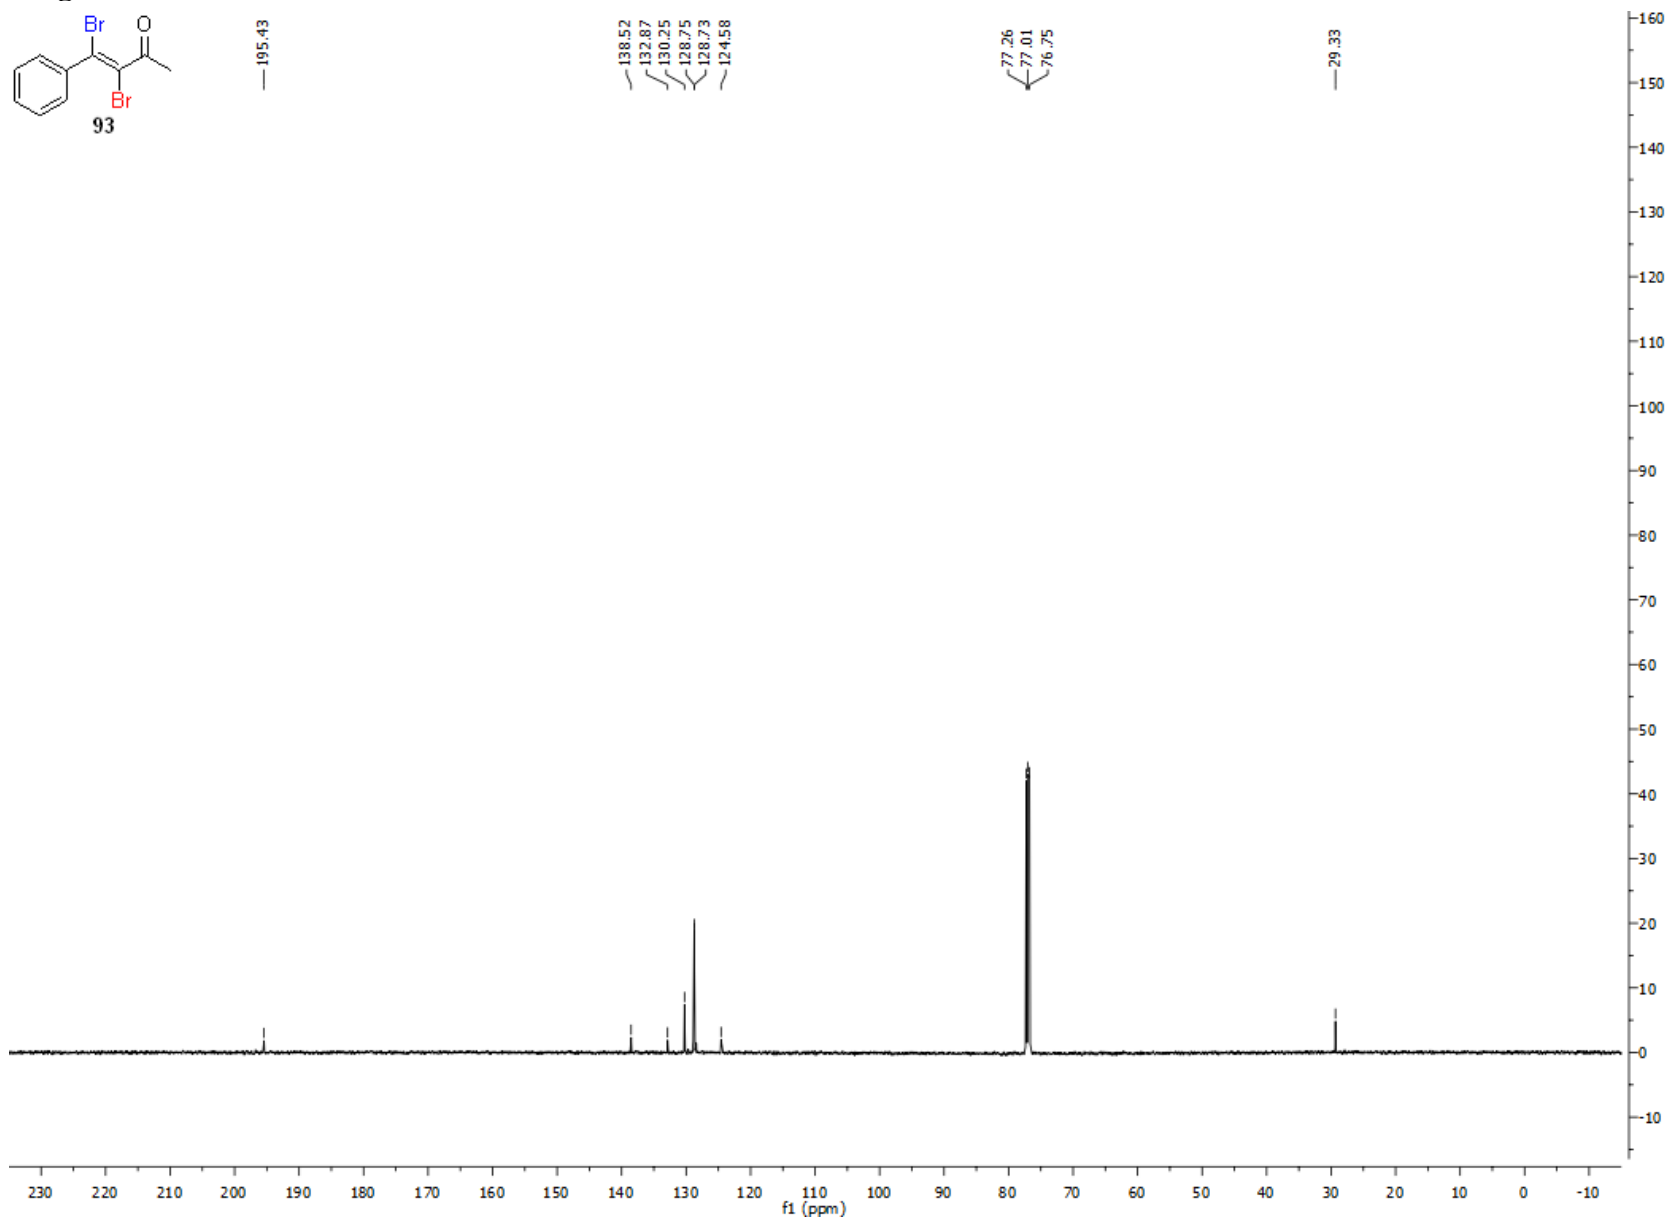

Figure S206. <sup>1</sup>H-NMR of 94

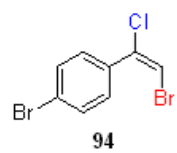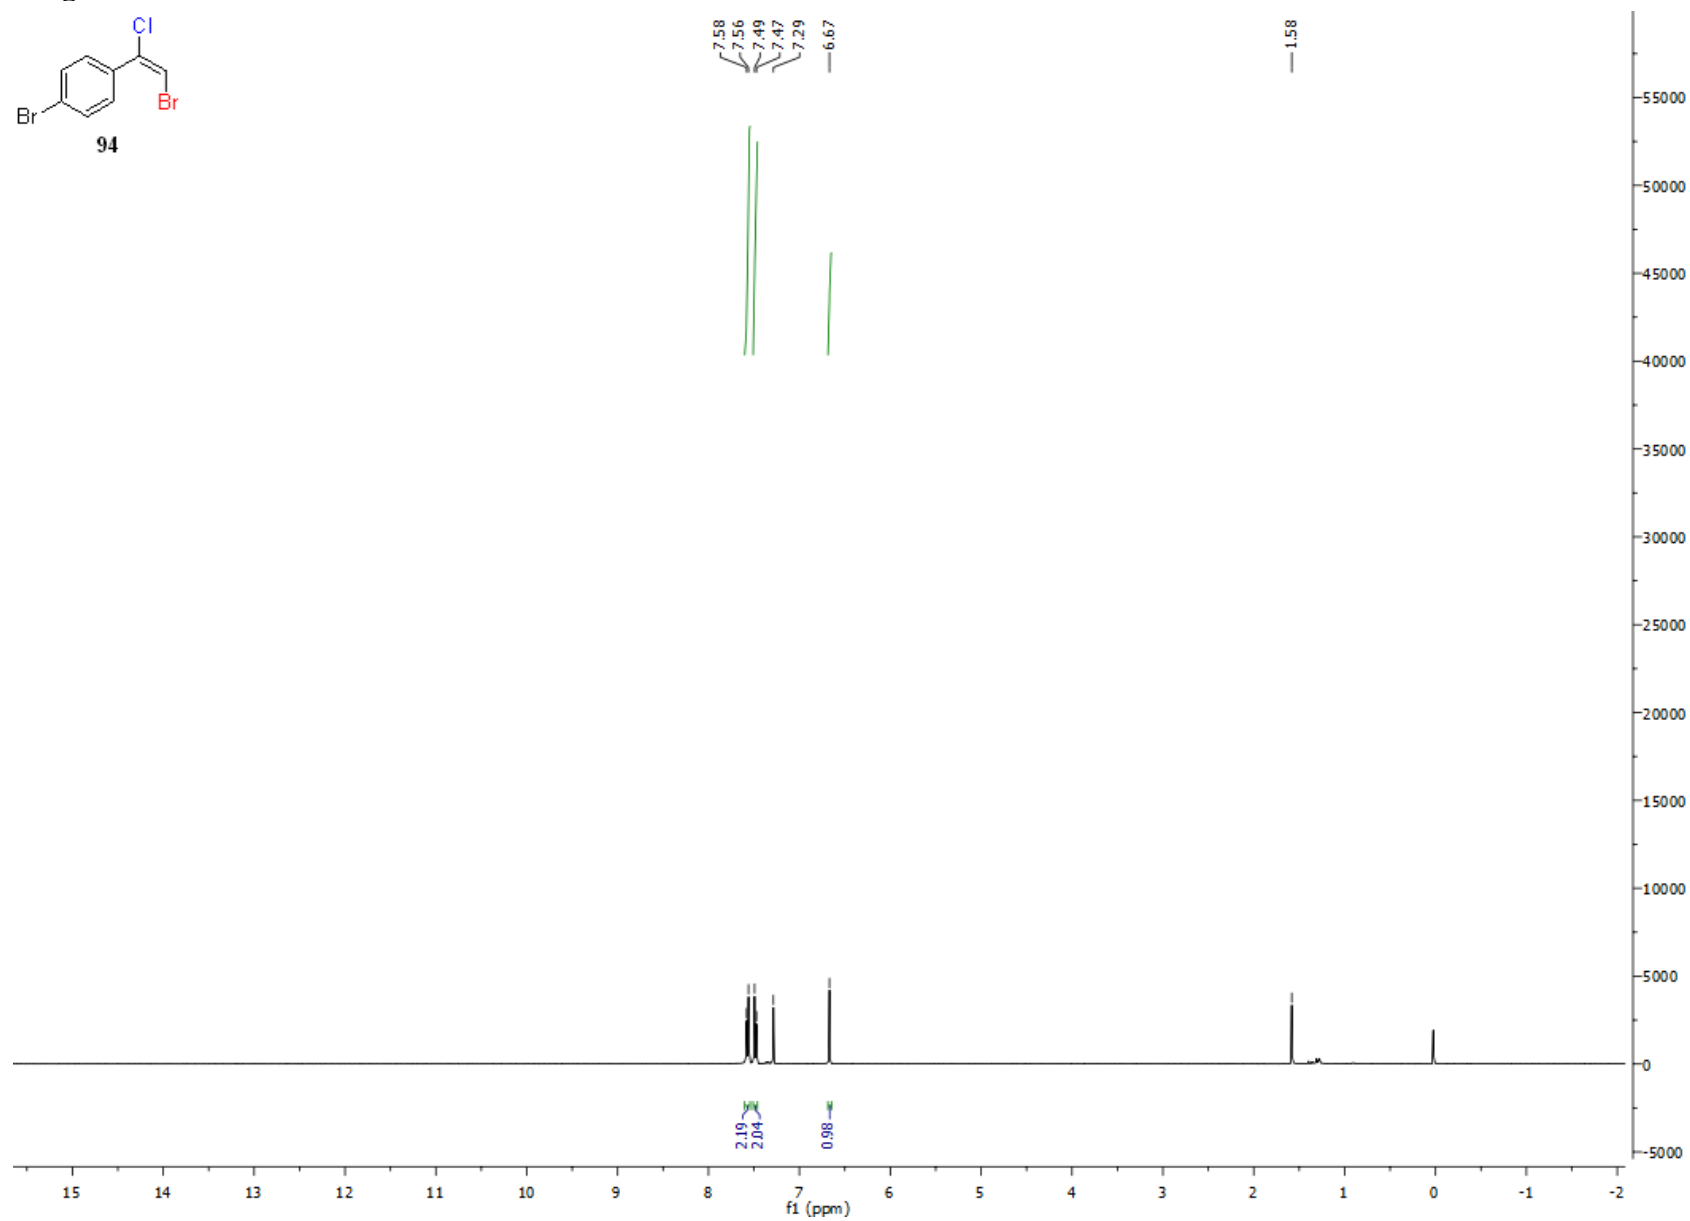

Figure S207.  $^{13}\text{C}$ -NMR of **94**

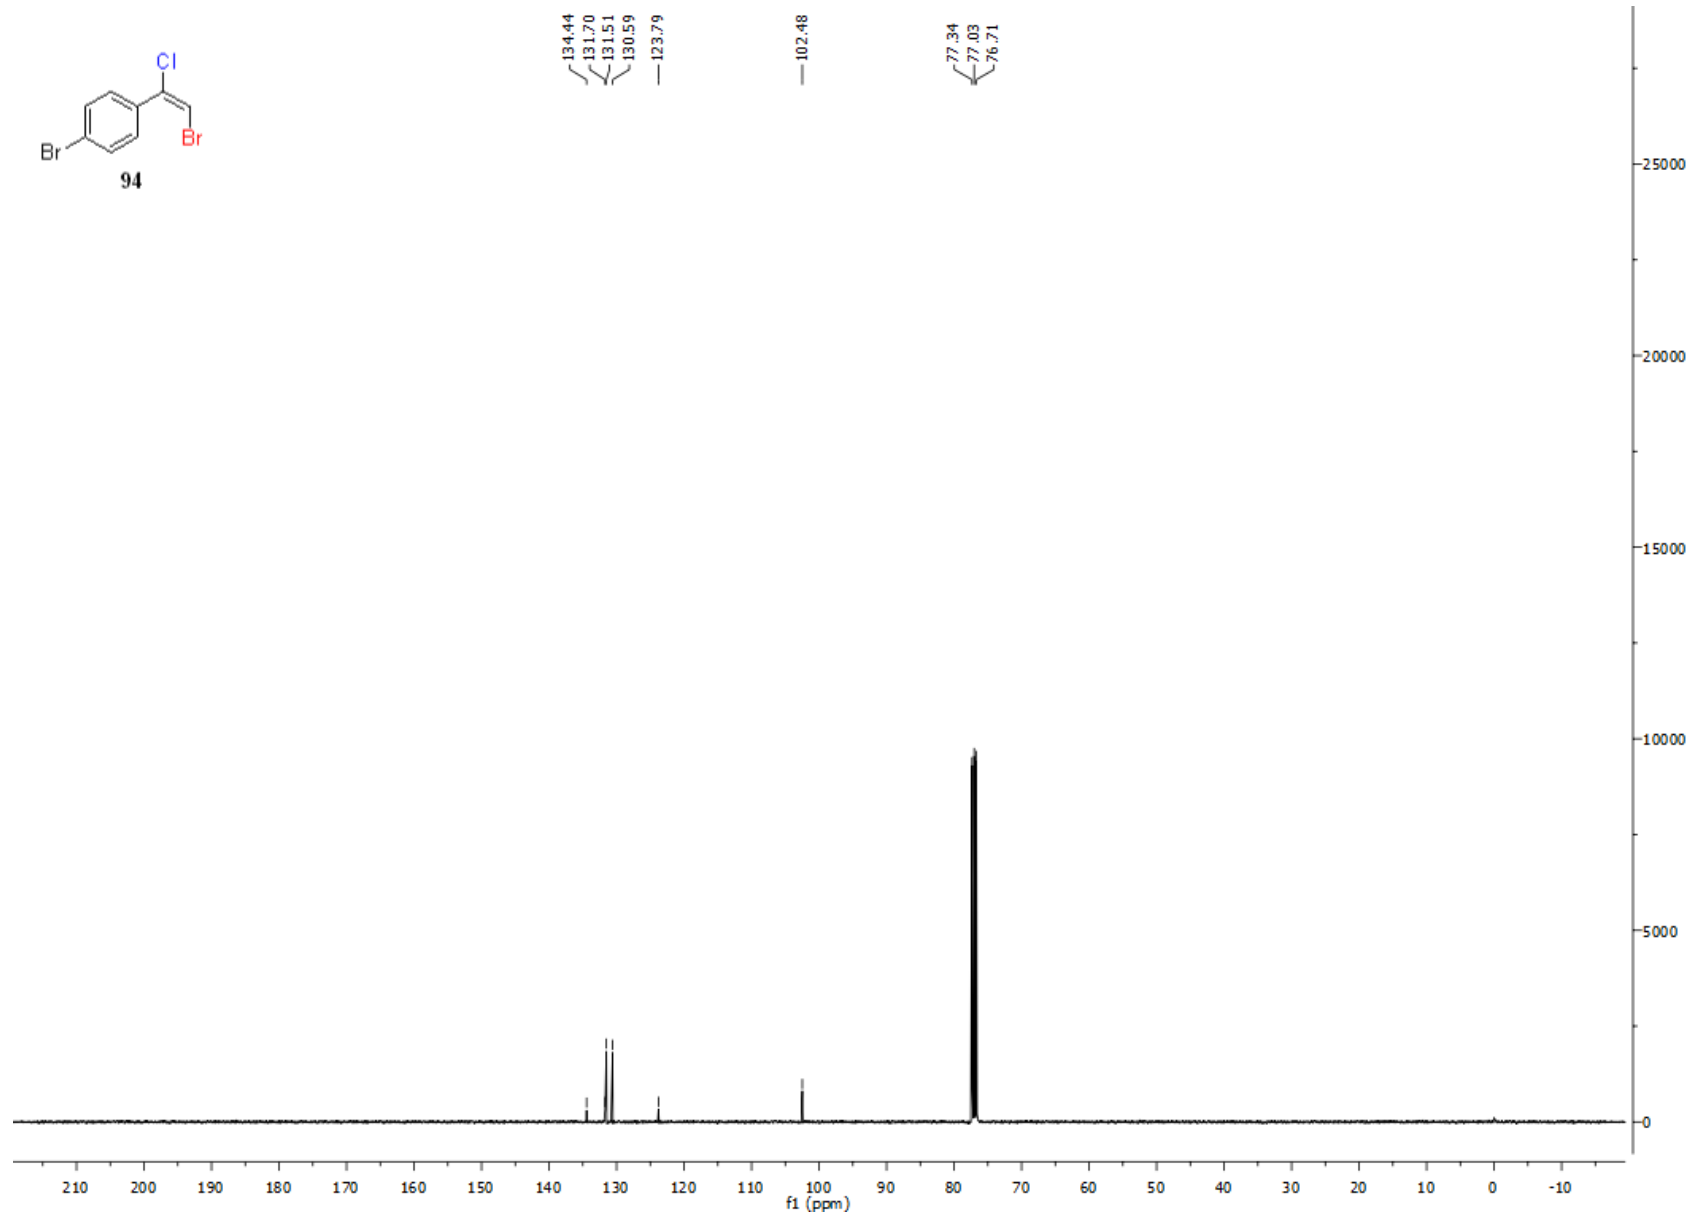

Figure S208. <sup>1</sup>H-NMR of 95

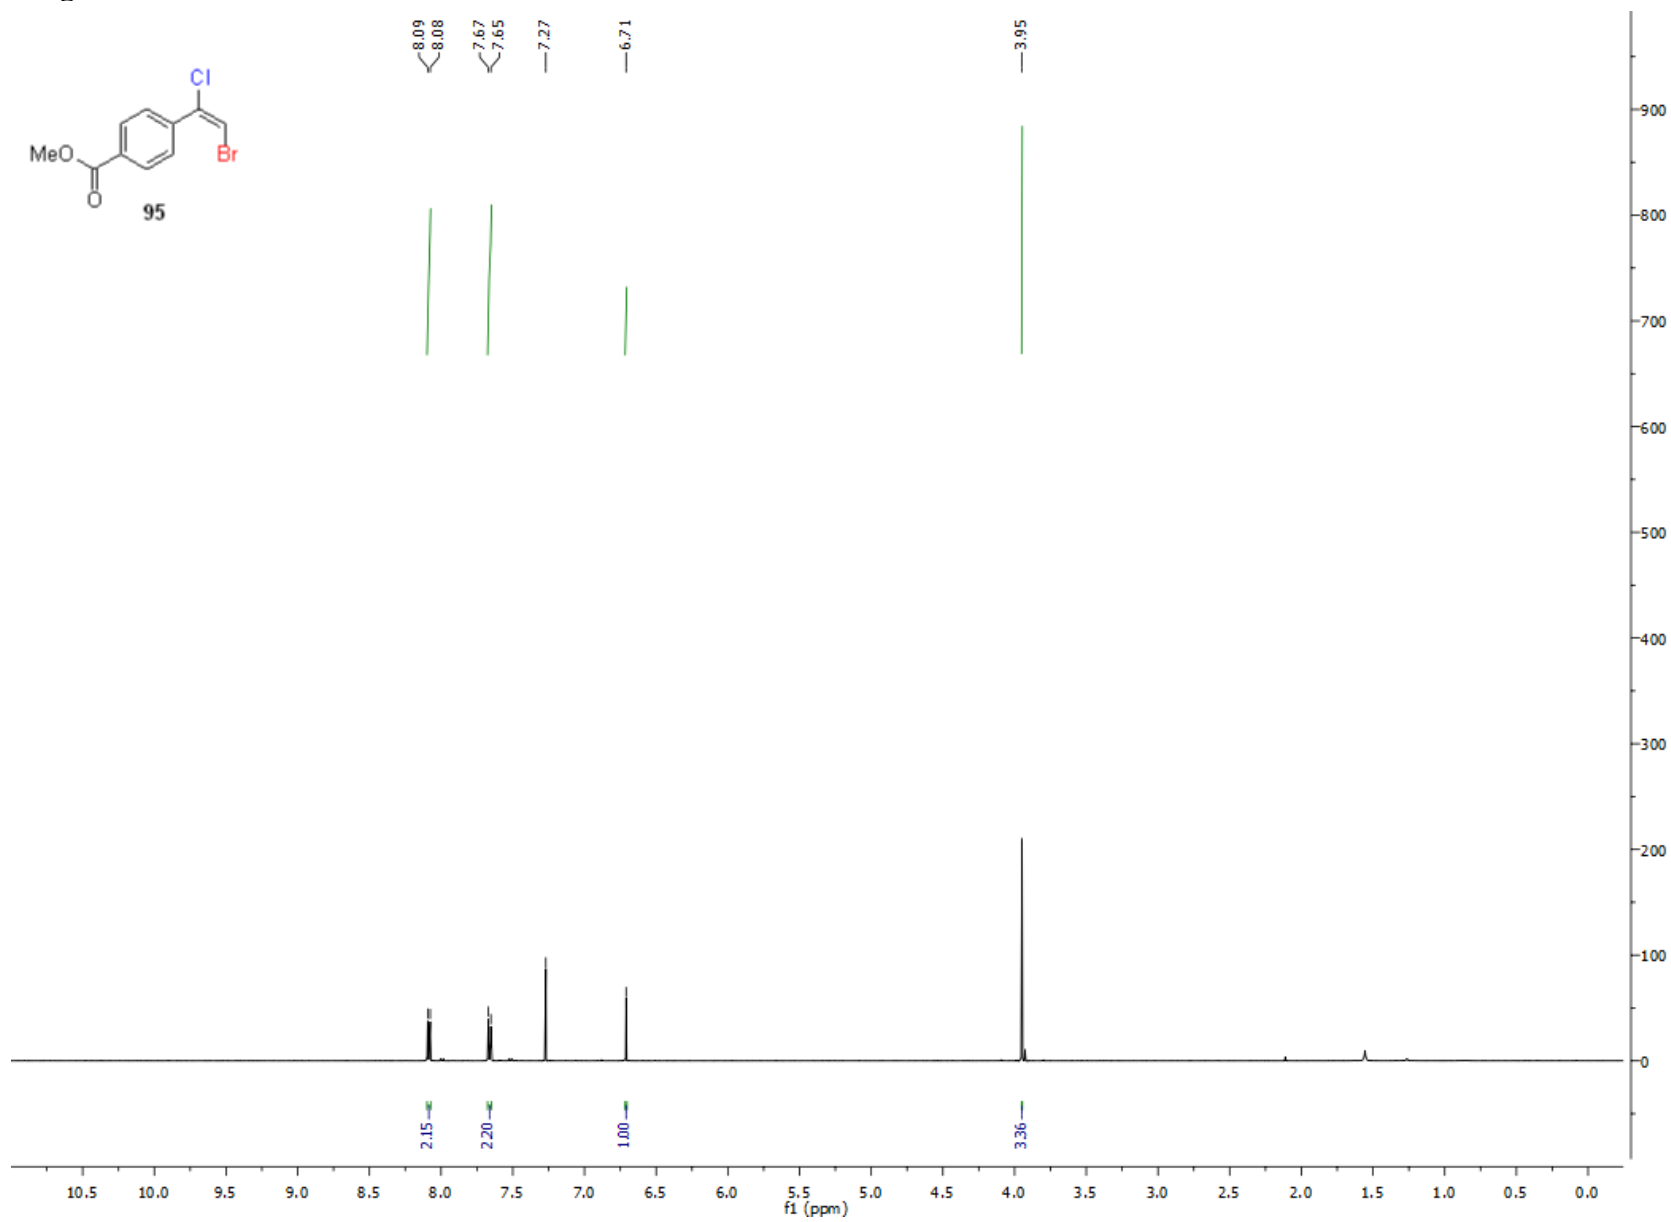

Figure S209.  $^{13}\text{C}$ -NMR of **95**

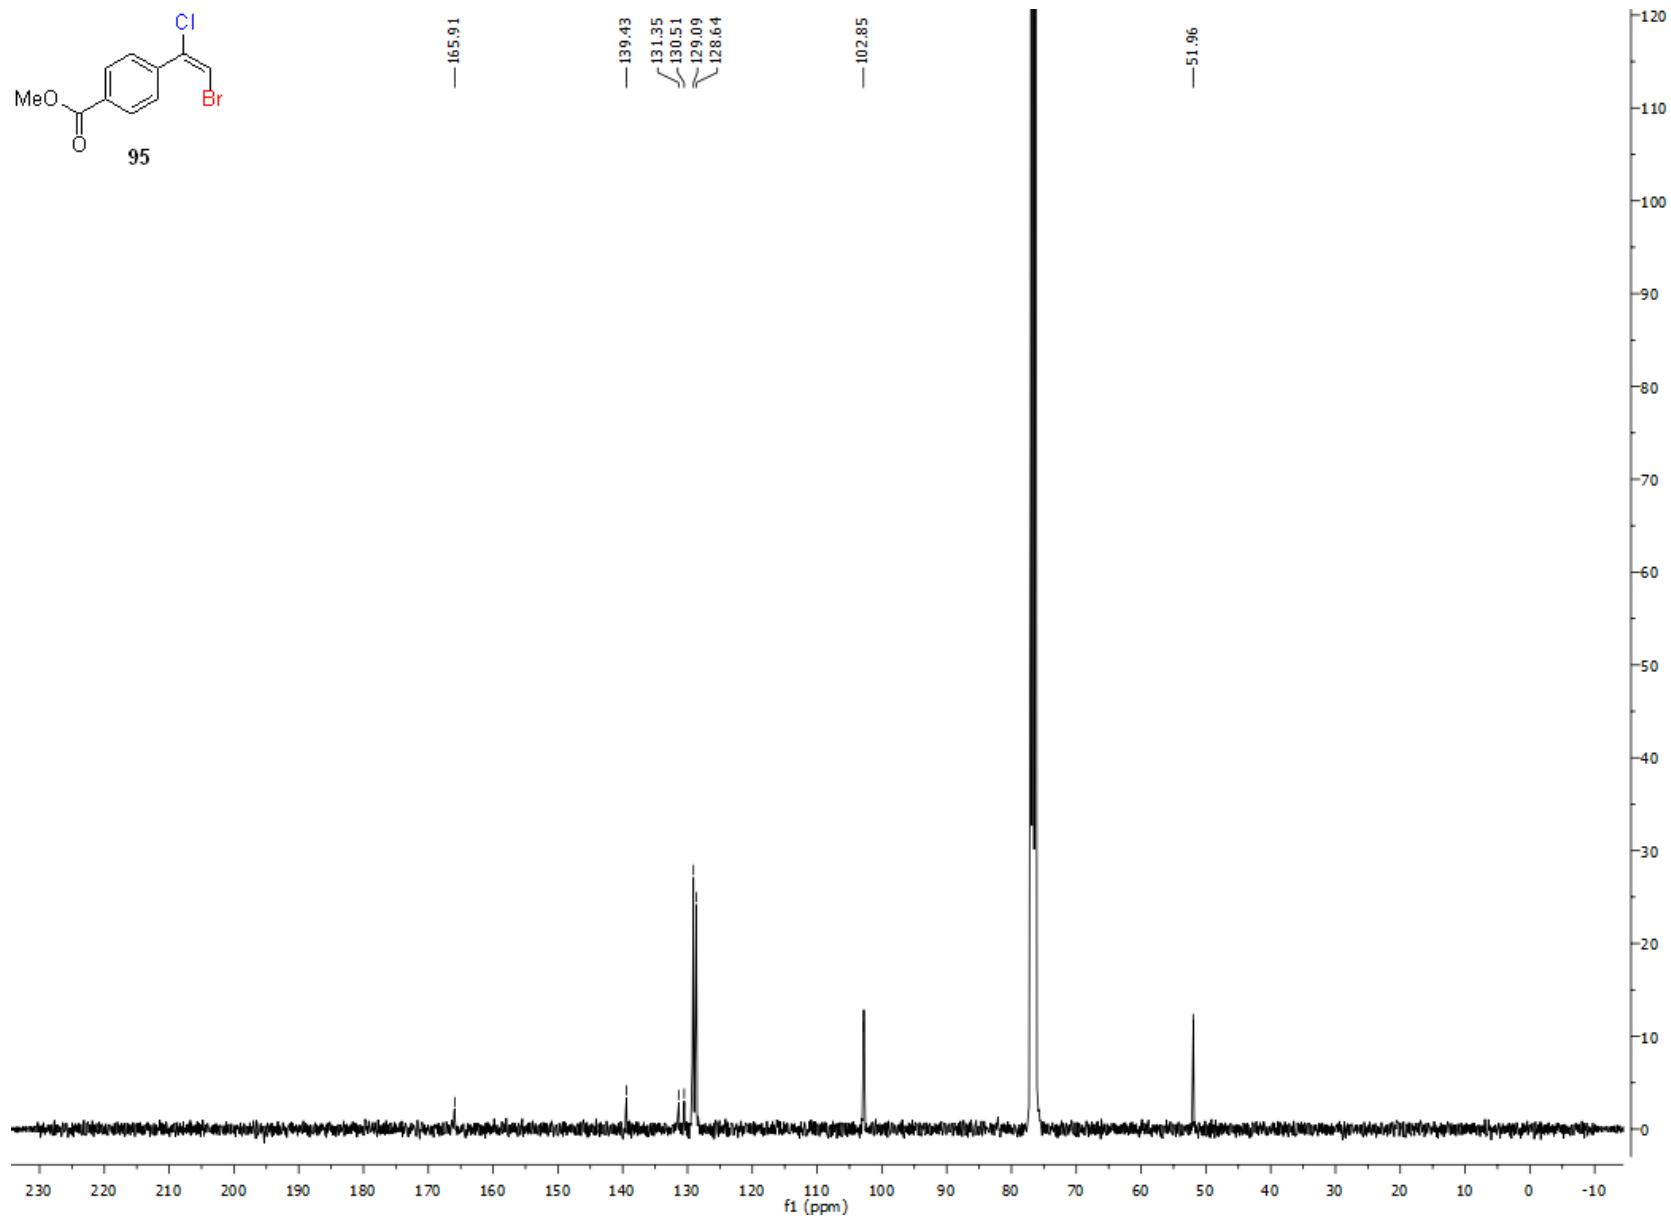

Figure S210. <sup>1</sup>H-NMR of 96

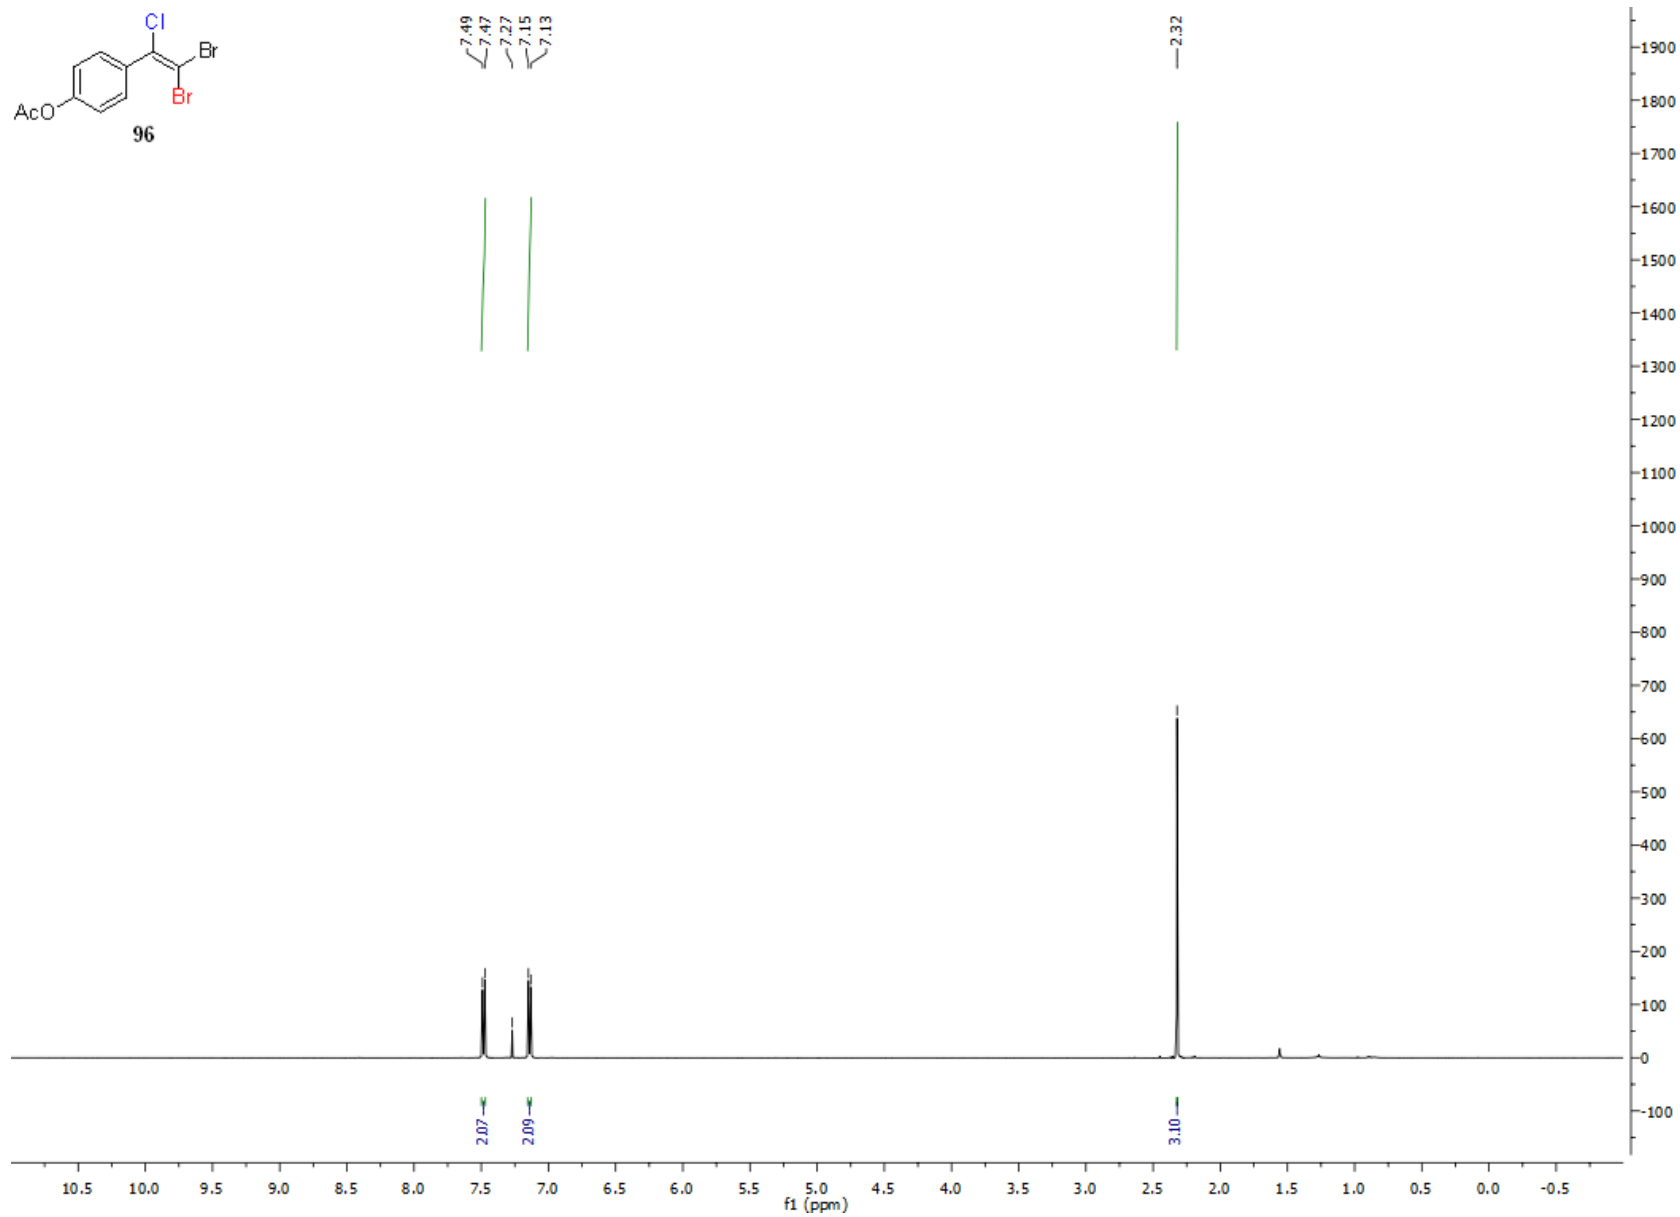



Figure S211.  $^{13}\text{C}$ -NMR of **96**

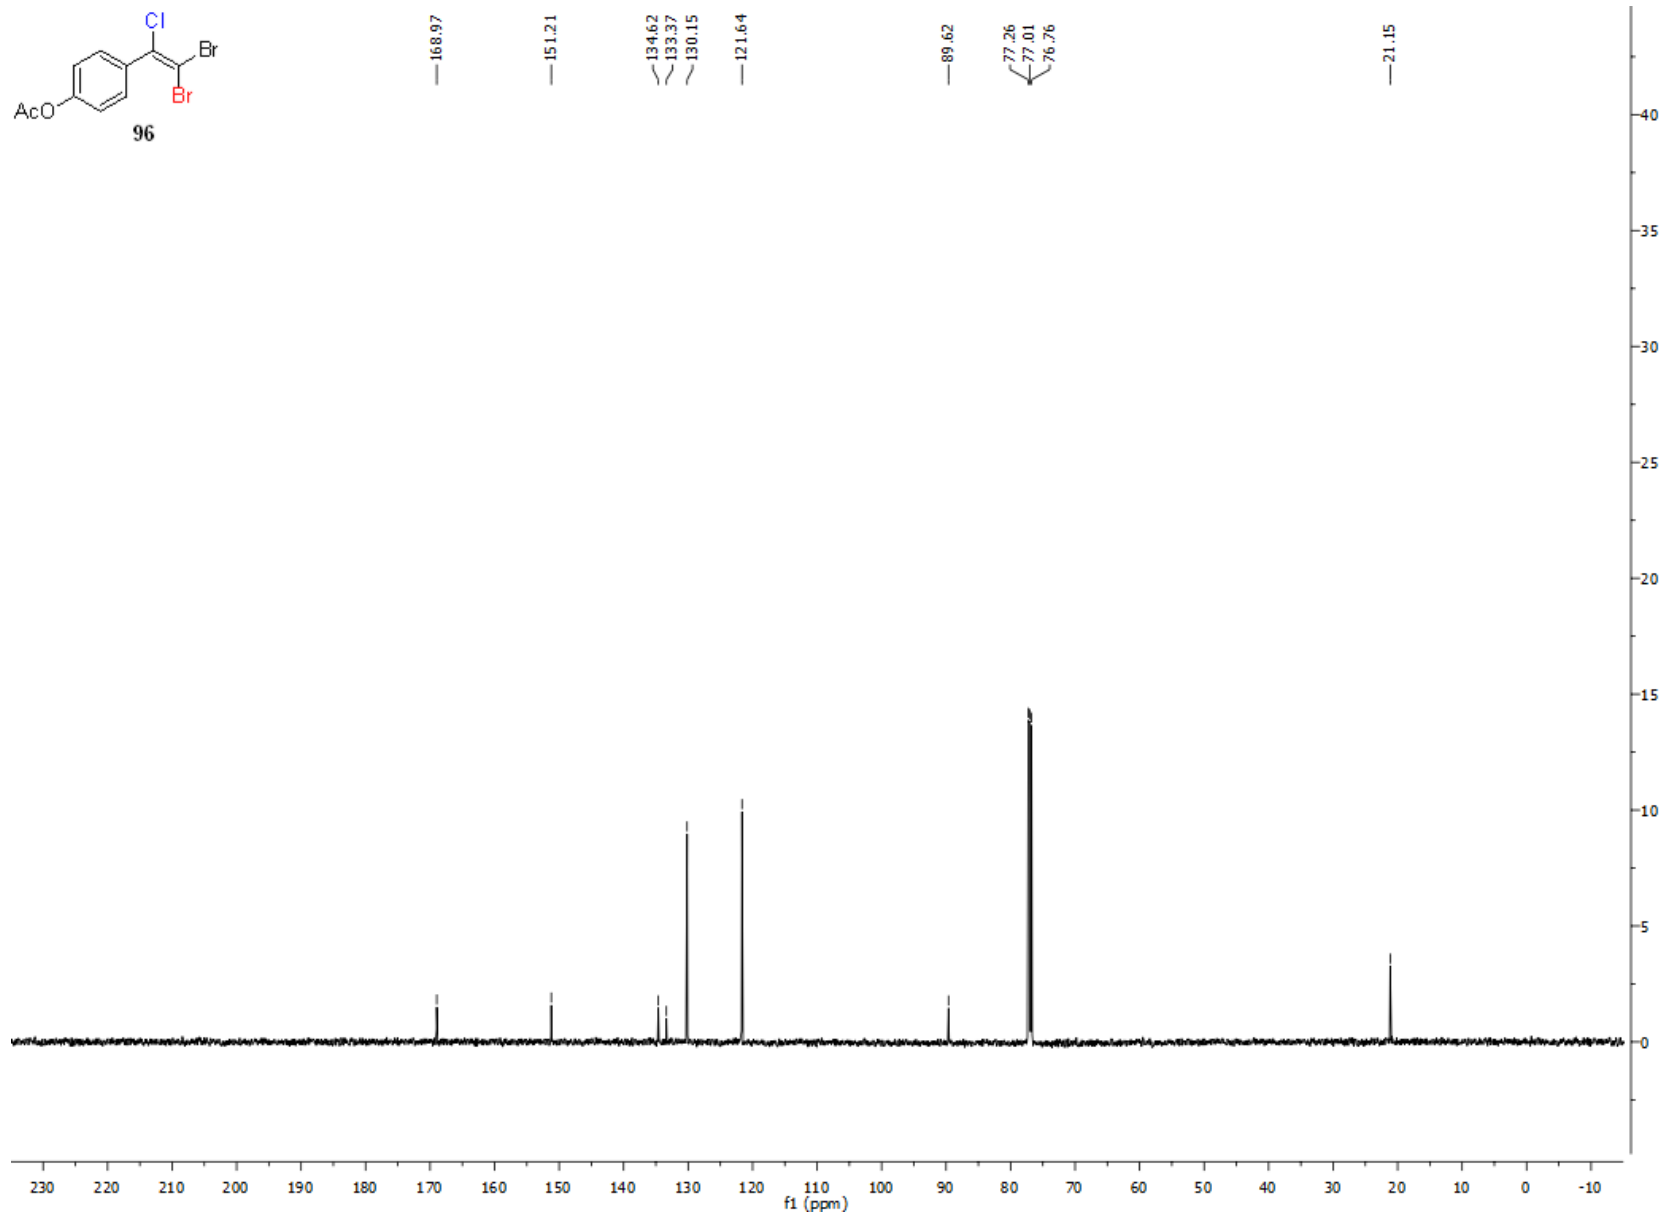

Figure S212. <sup>1</sup>H-NMR of 97

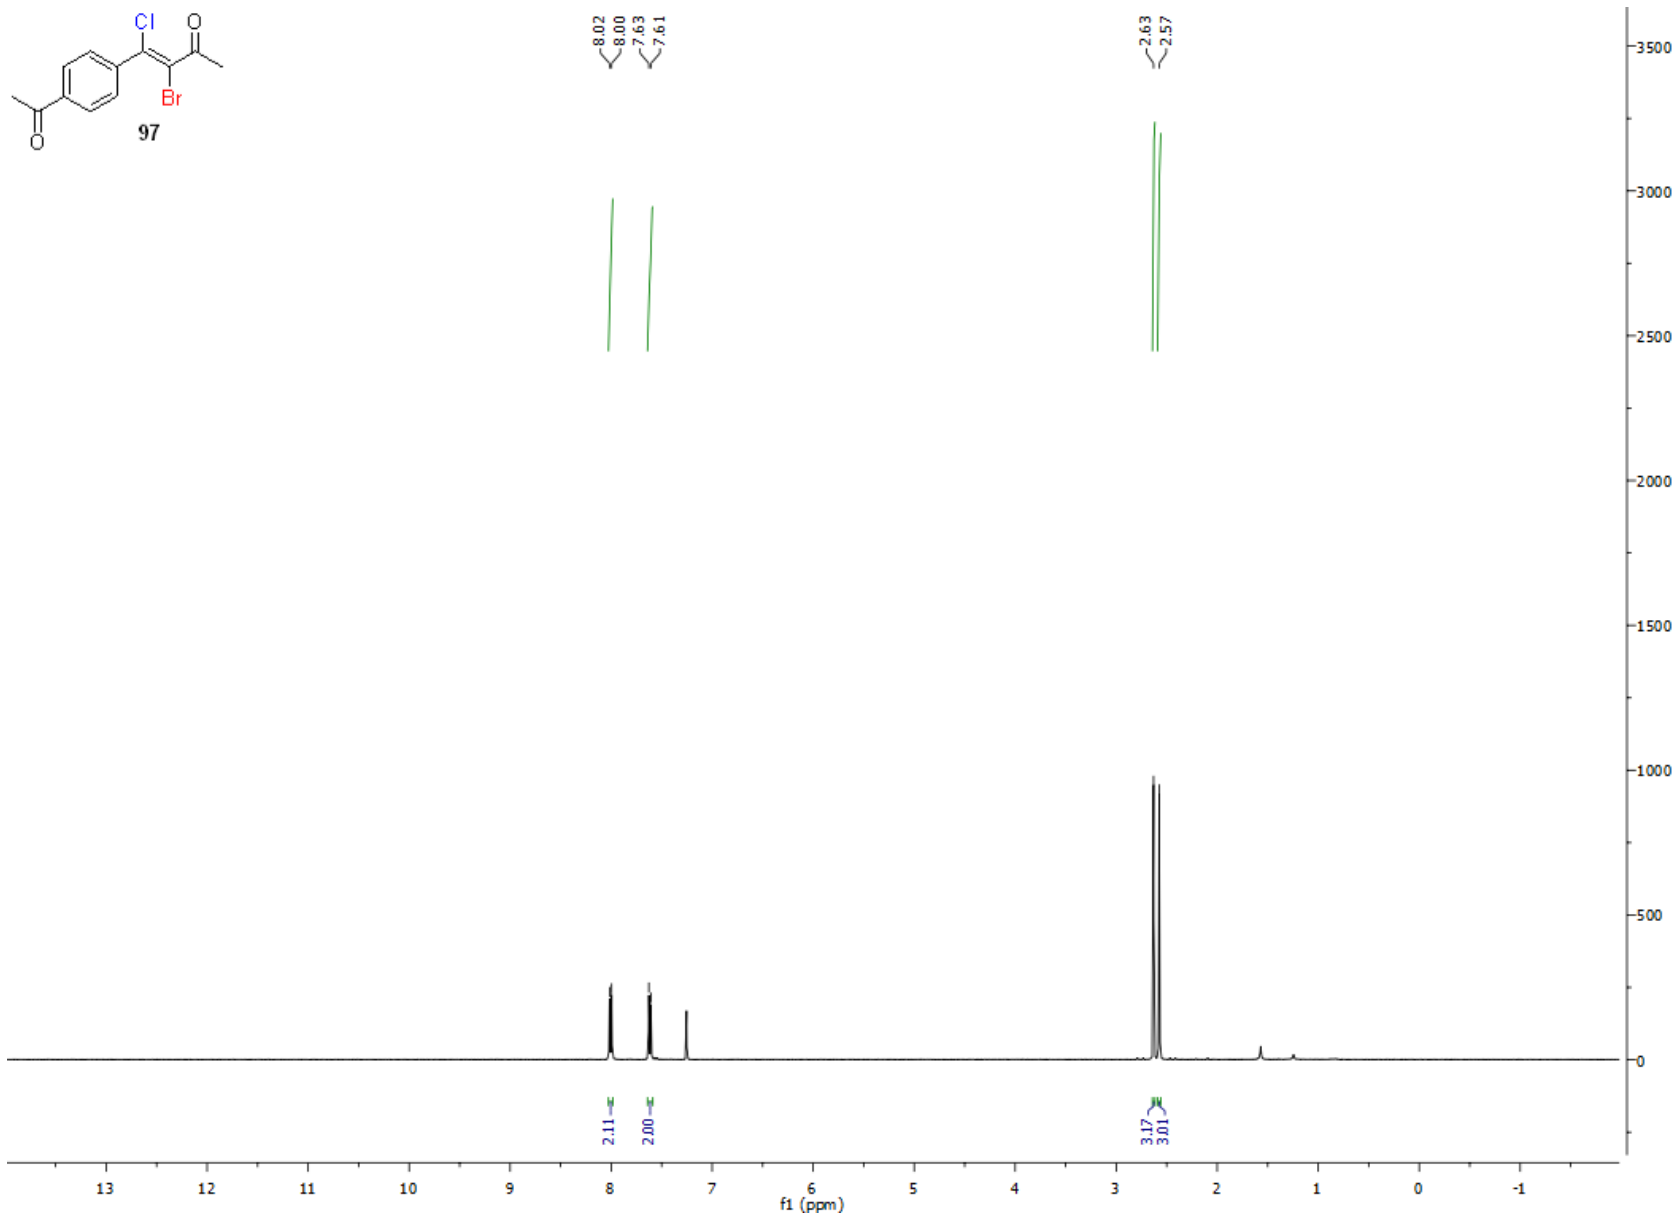

Figure S213.  $^{13}\text{C}$ -NMR of **97**

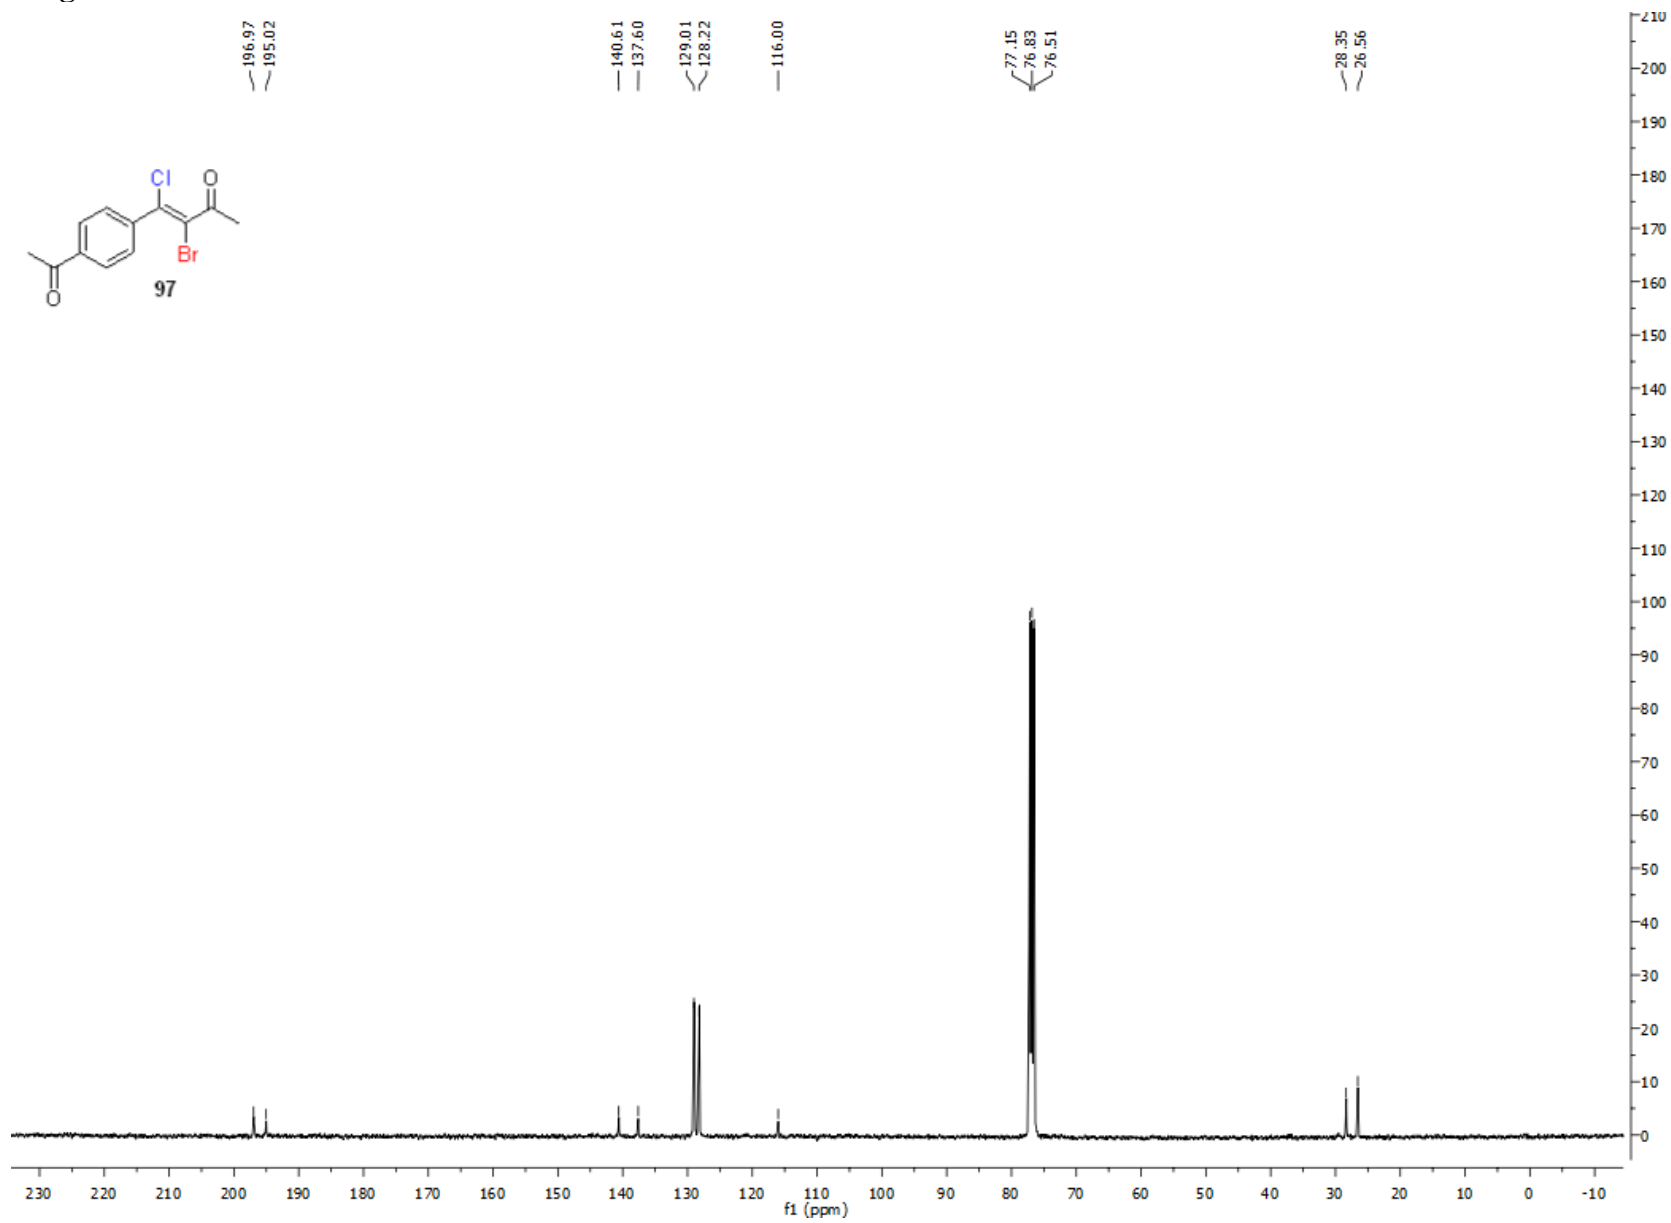

Figure S214. <sup>1</sup>H-NMR of 98

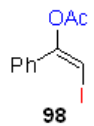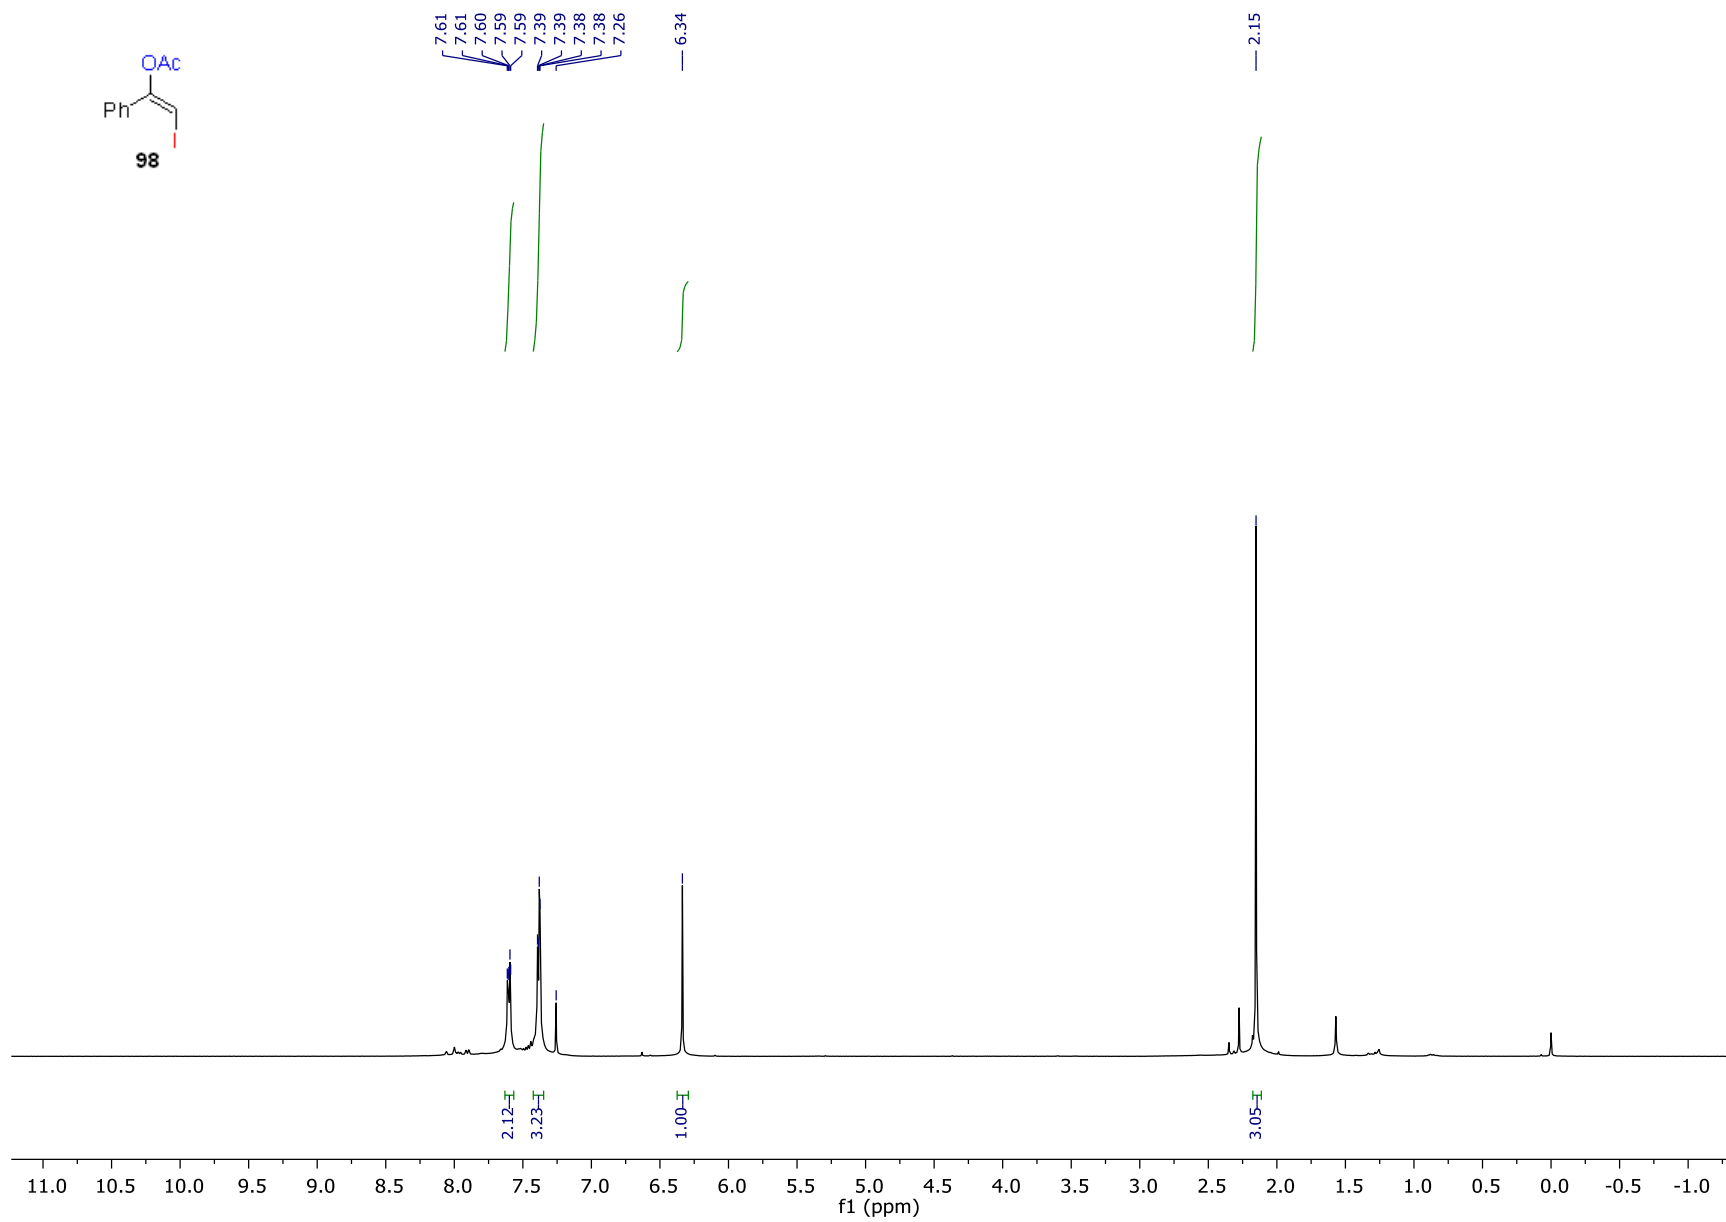

Figure S215.  $^{13}\text{C}$ -NMR of **98**

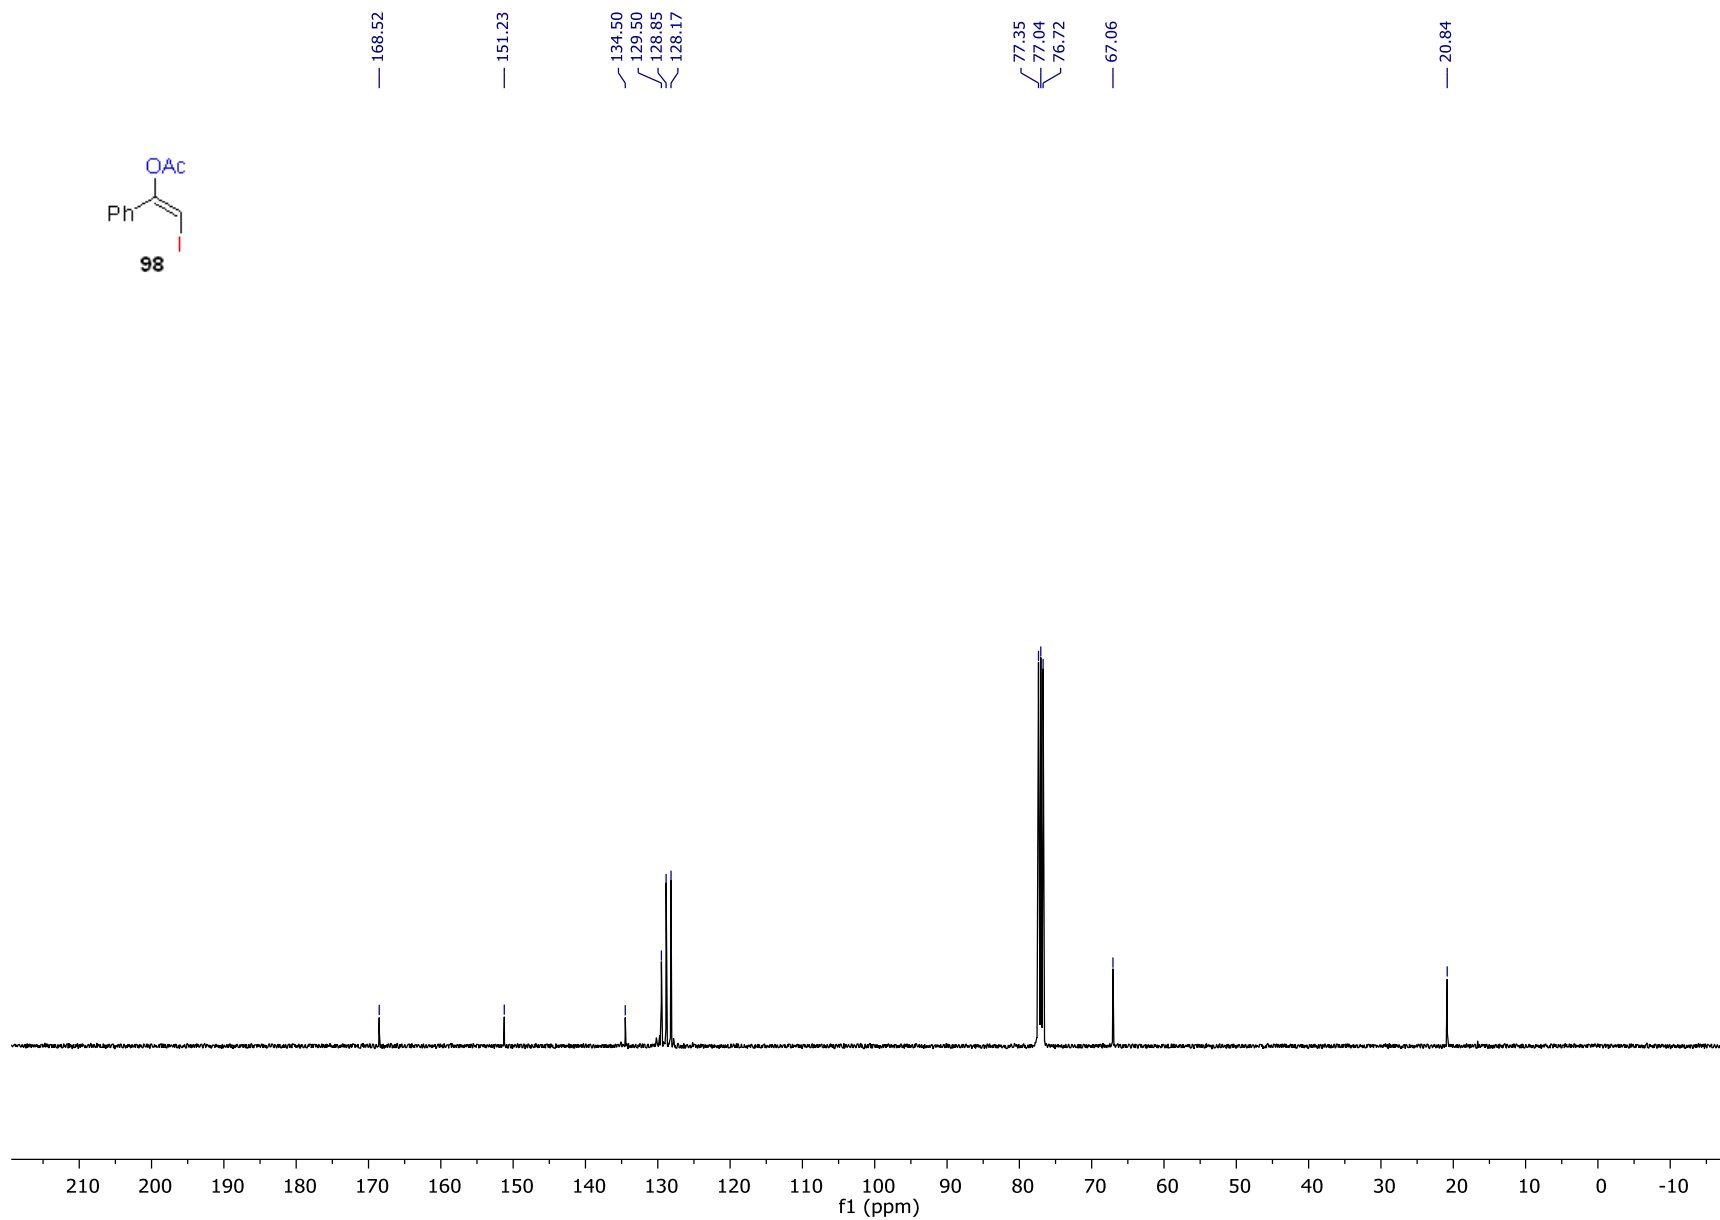

Figure S216. <sup>1</sup>H-NMR of **99**

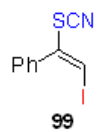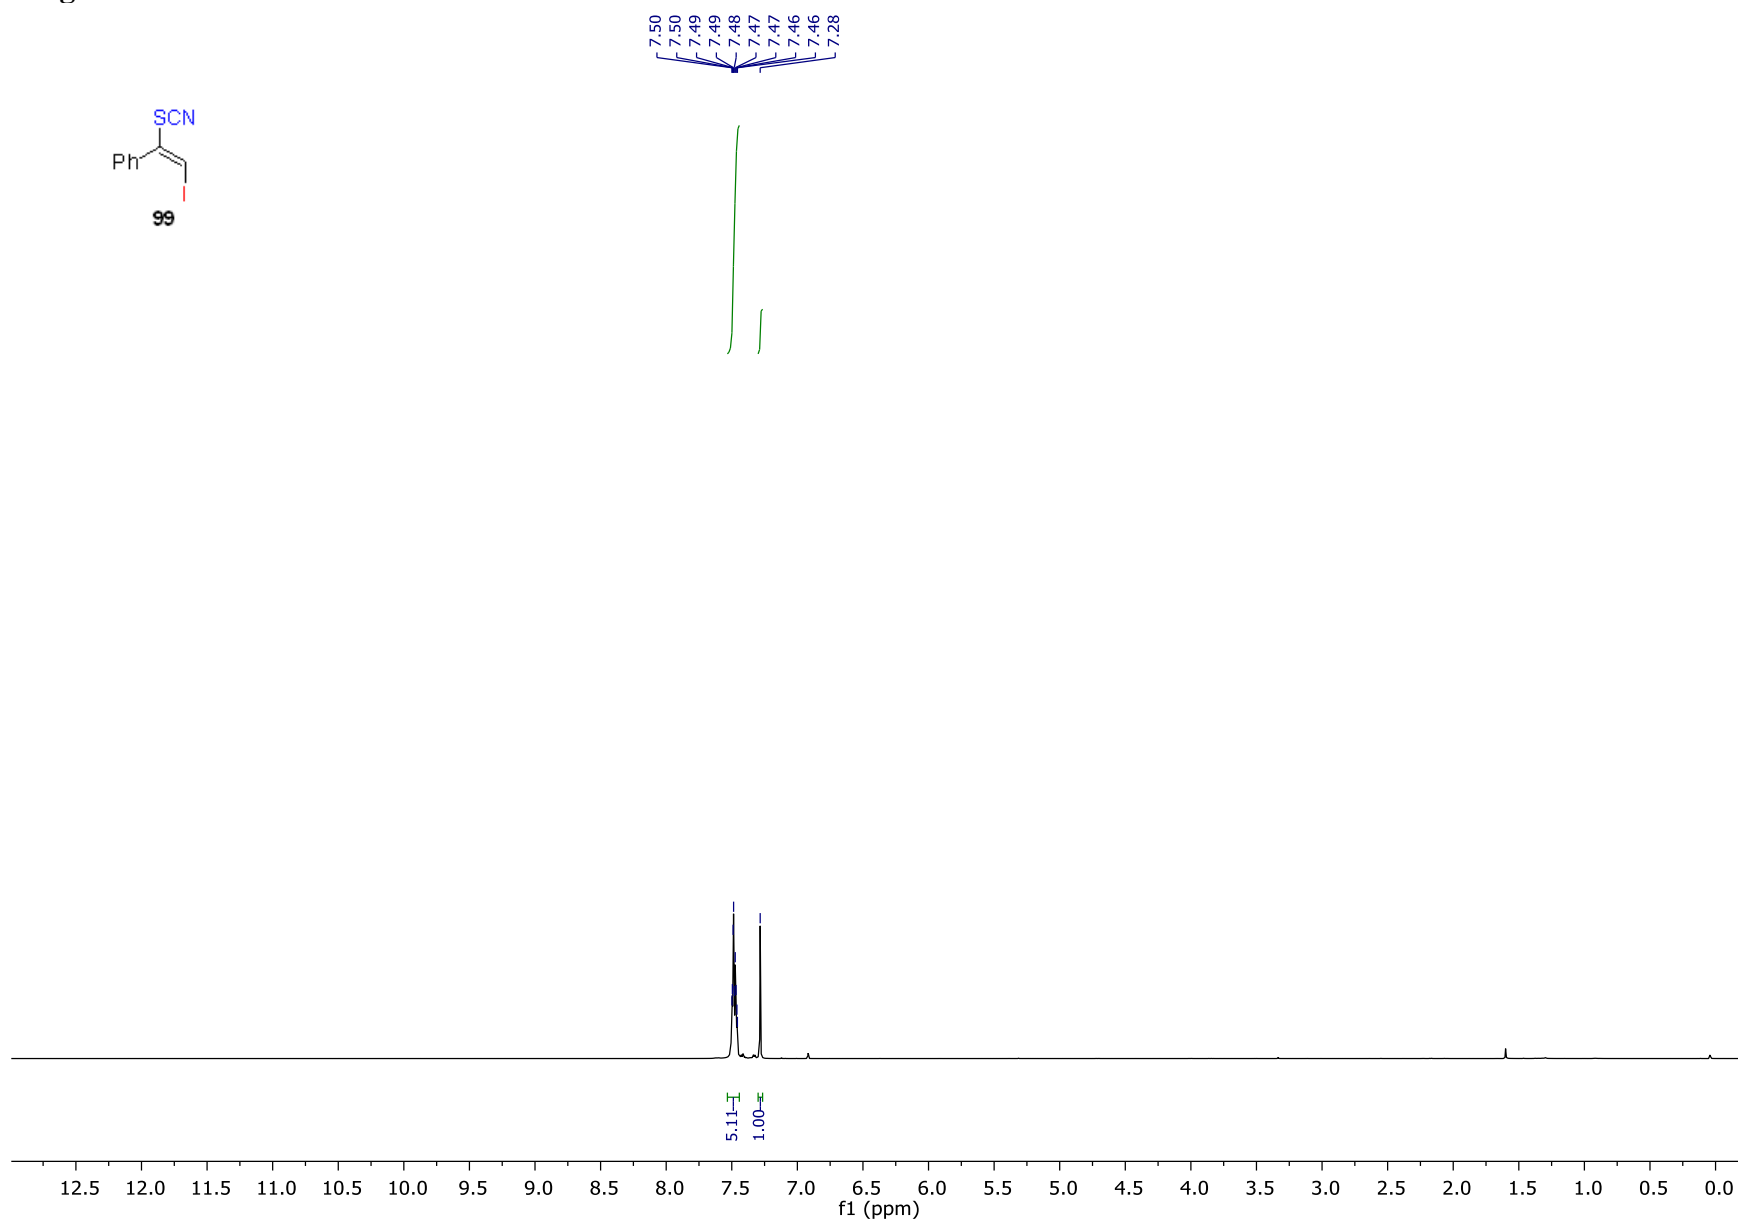

Figure S217.  $^{13}\text{C}$ -NMR of **99**

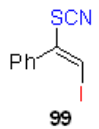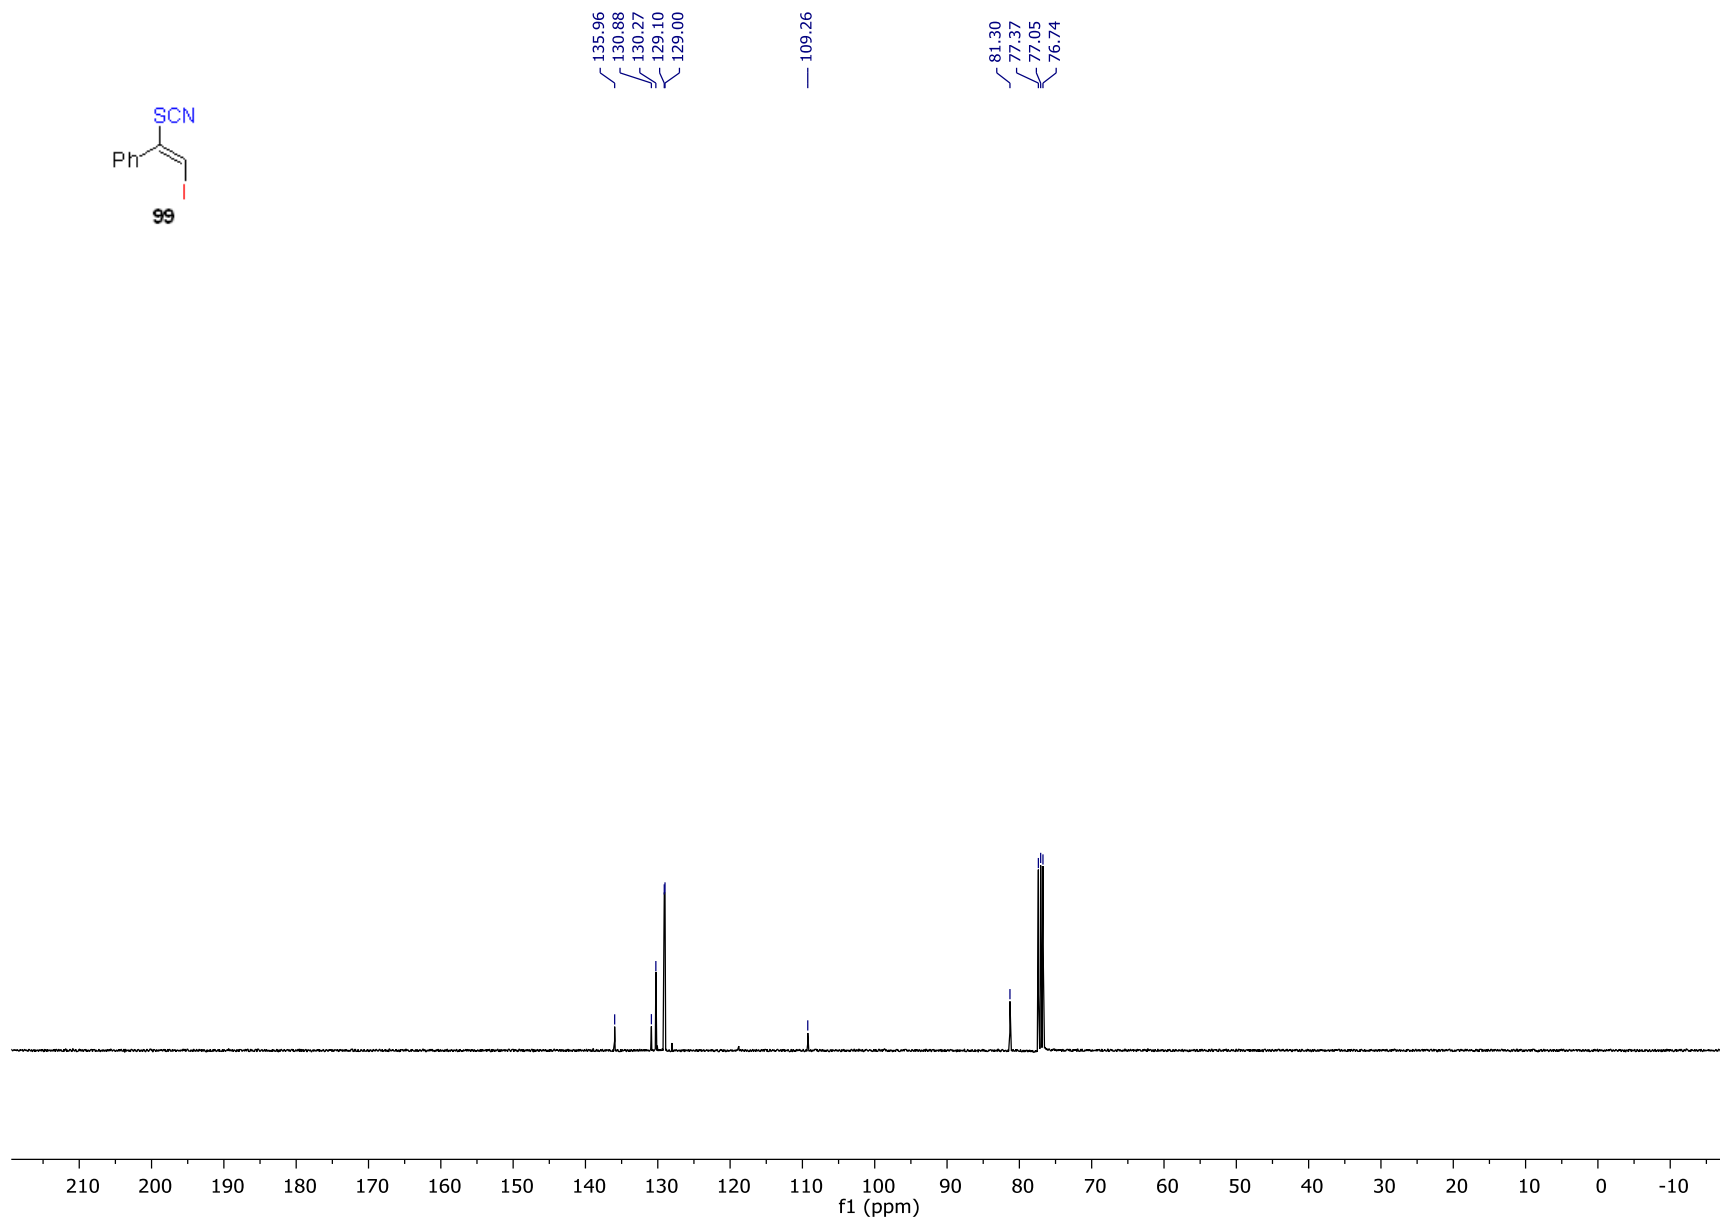

Figure S218. <sup>1</sup>H-NMR of 2A

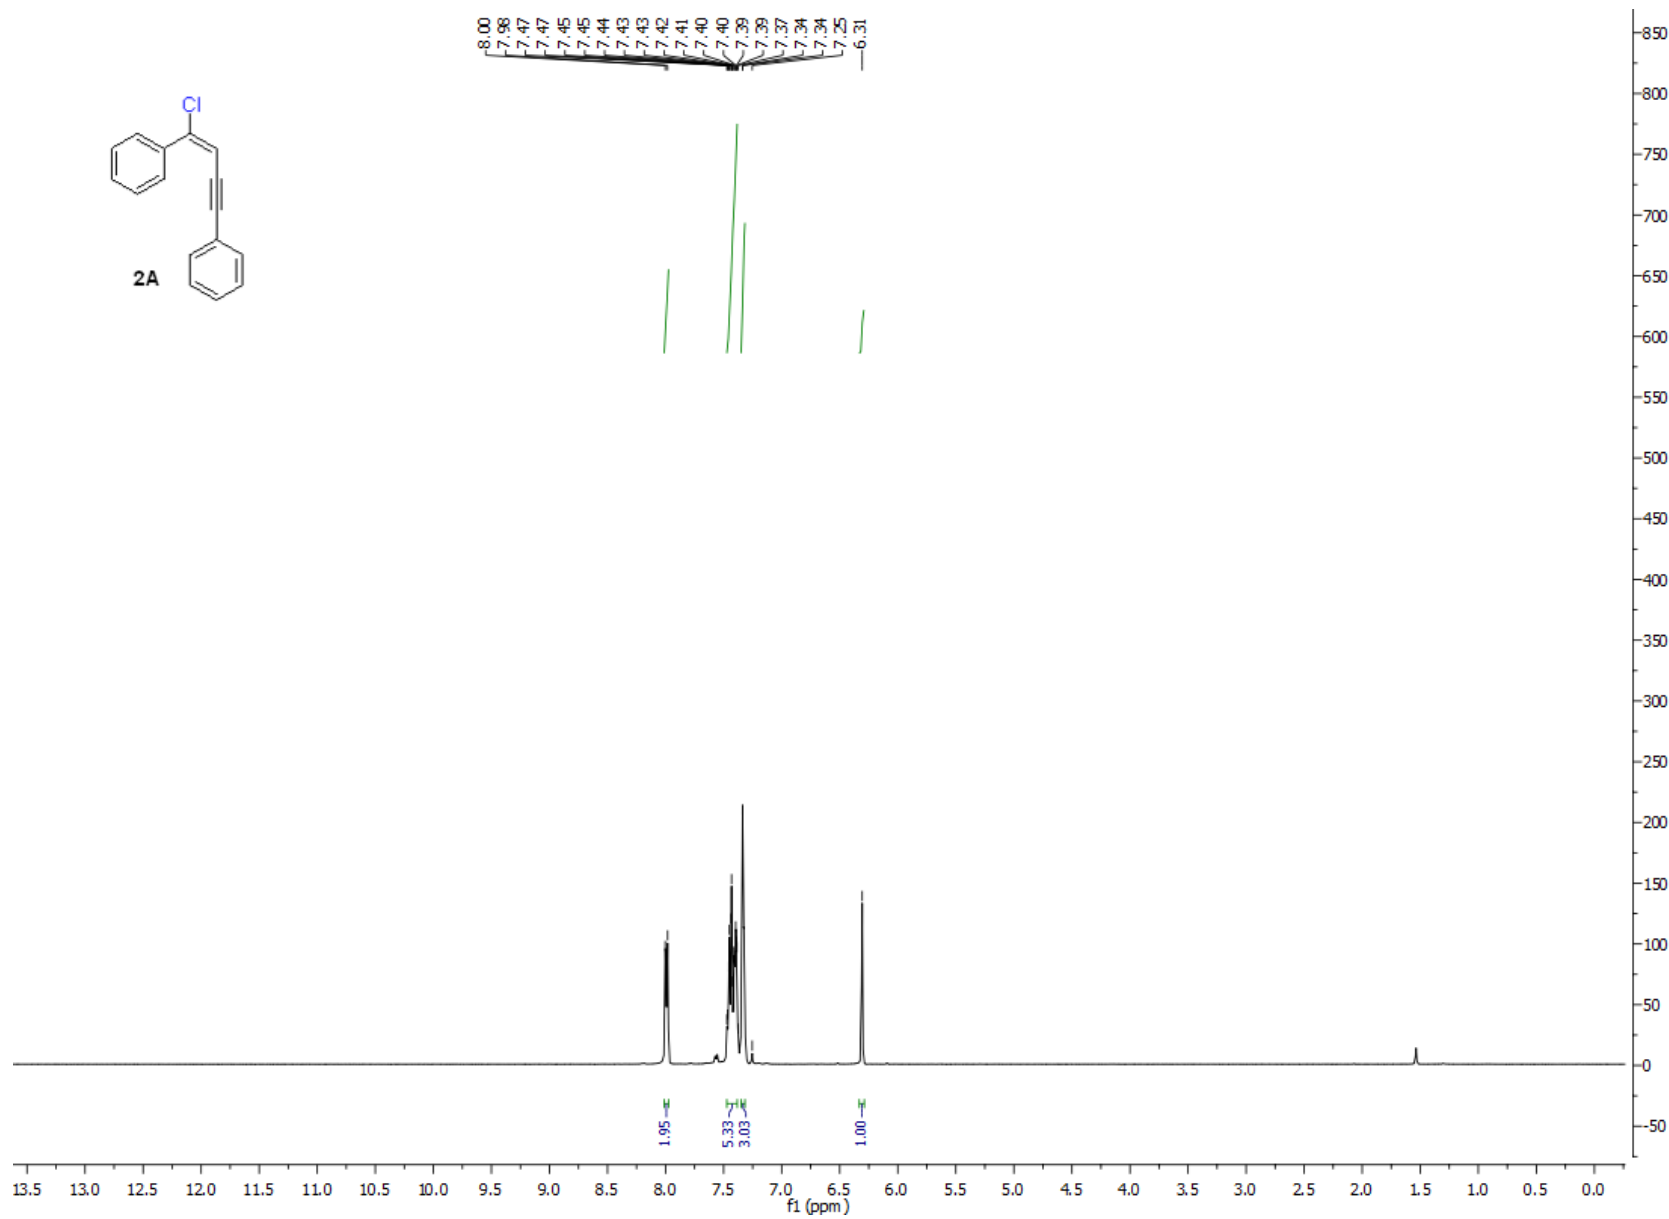



Figure S219.  $^{13}\text{C}$ -NMR of 2A

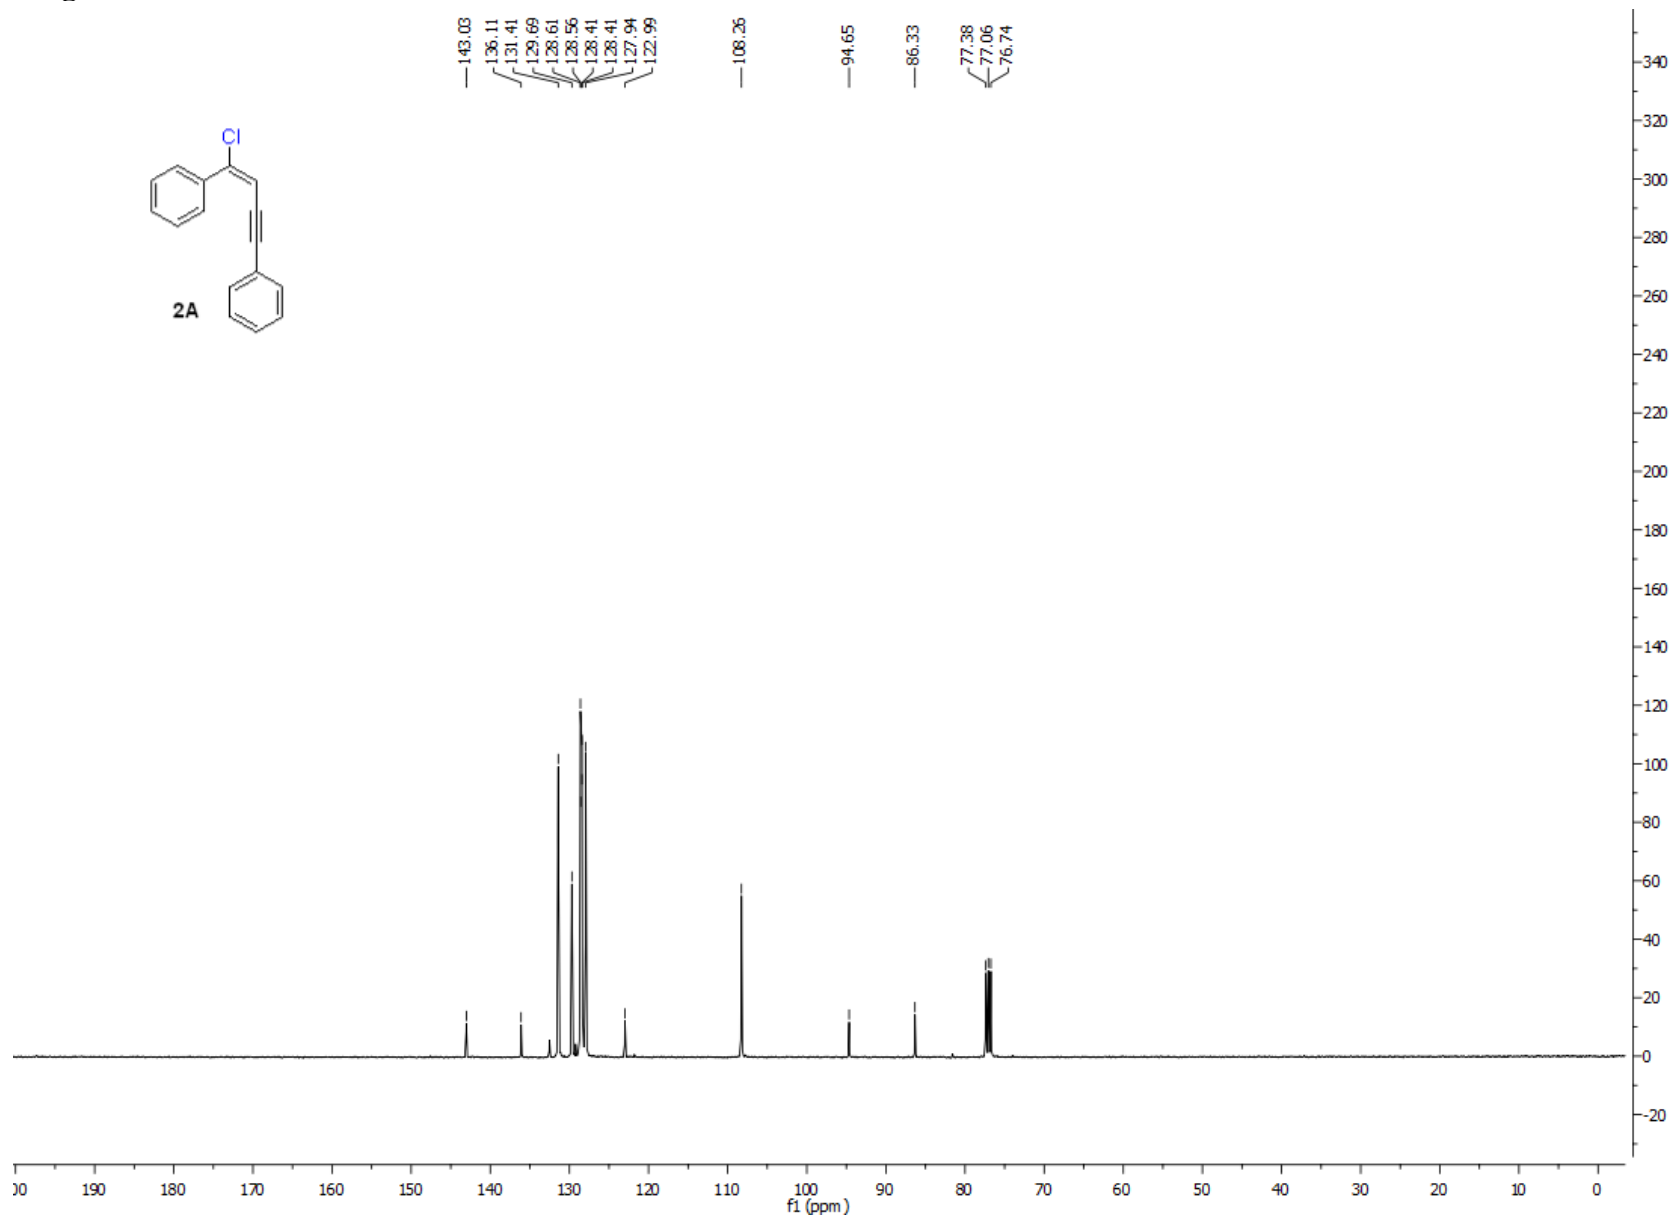

Figure S220. <sup>1</sup>H-NMR of 100

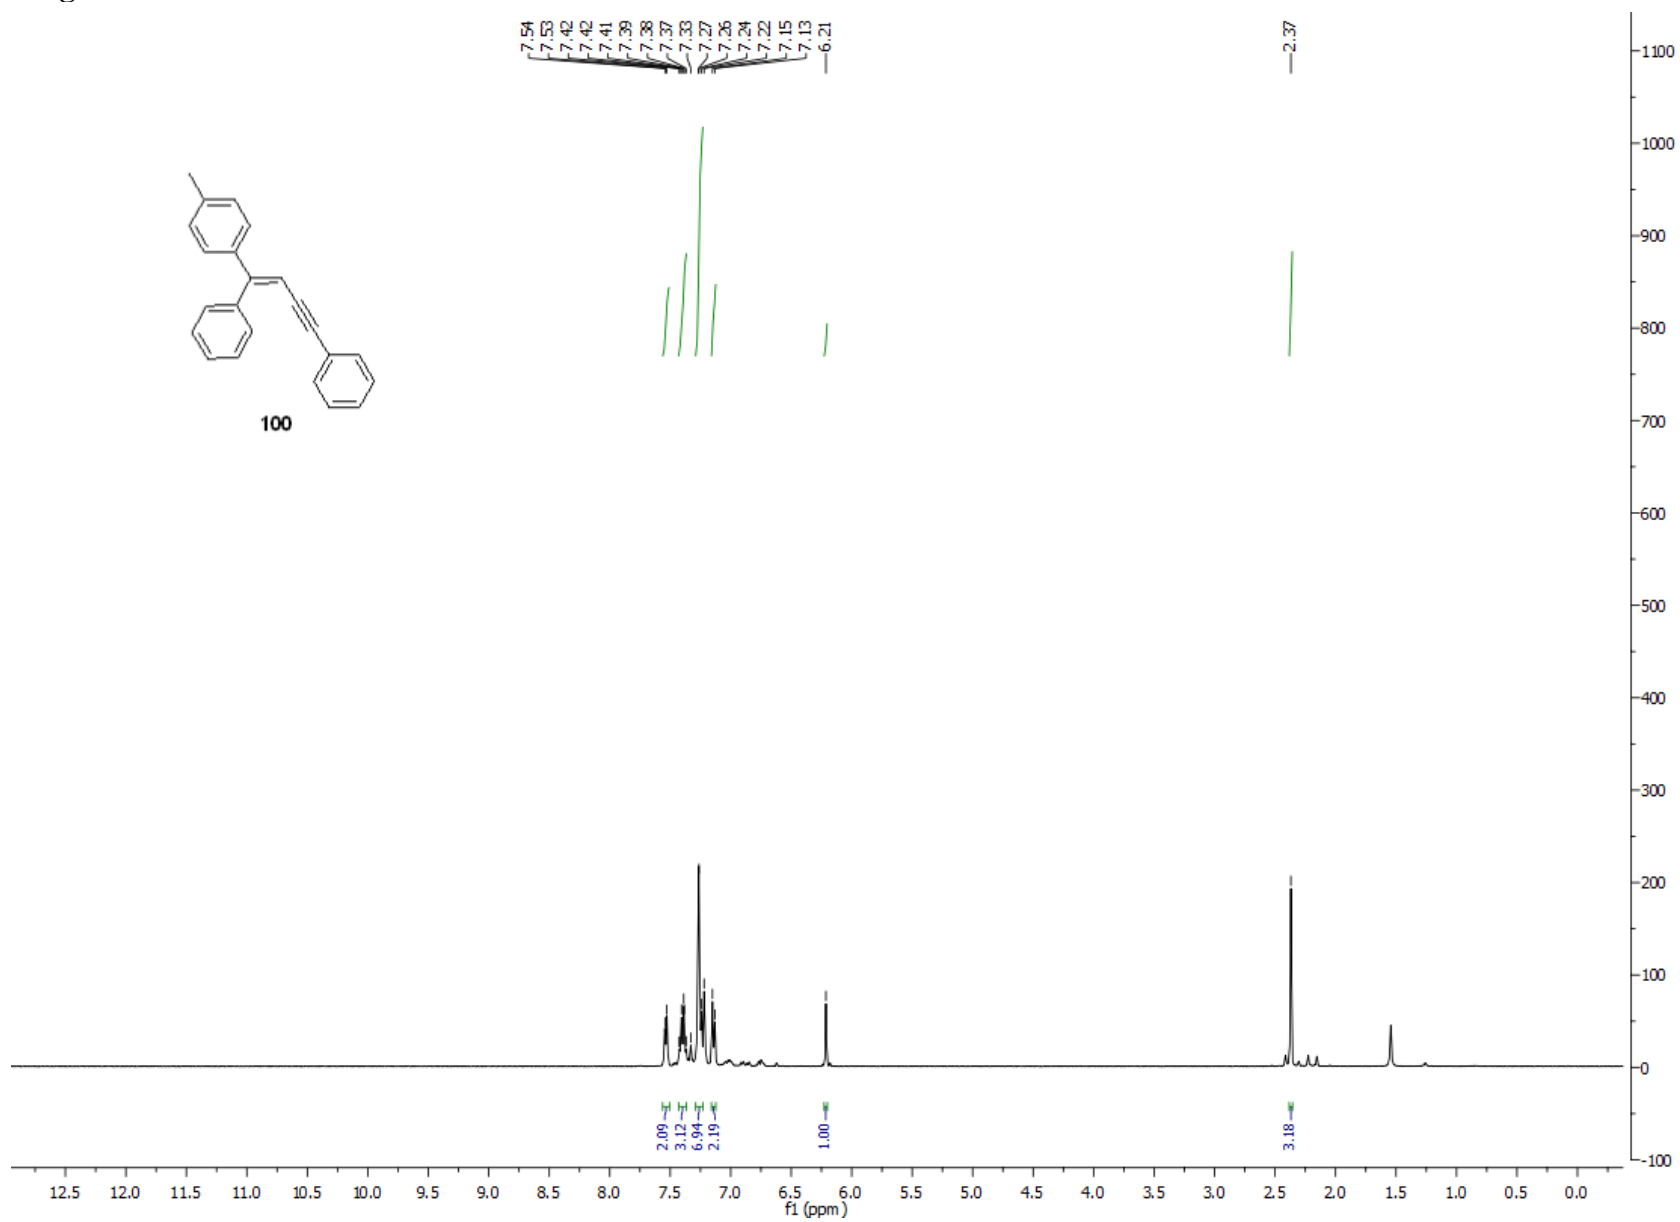

Figure S221.  $^{13}\text{C}$ -NMR of **100**

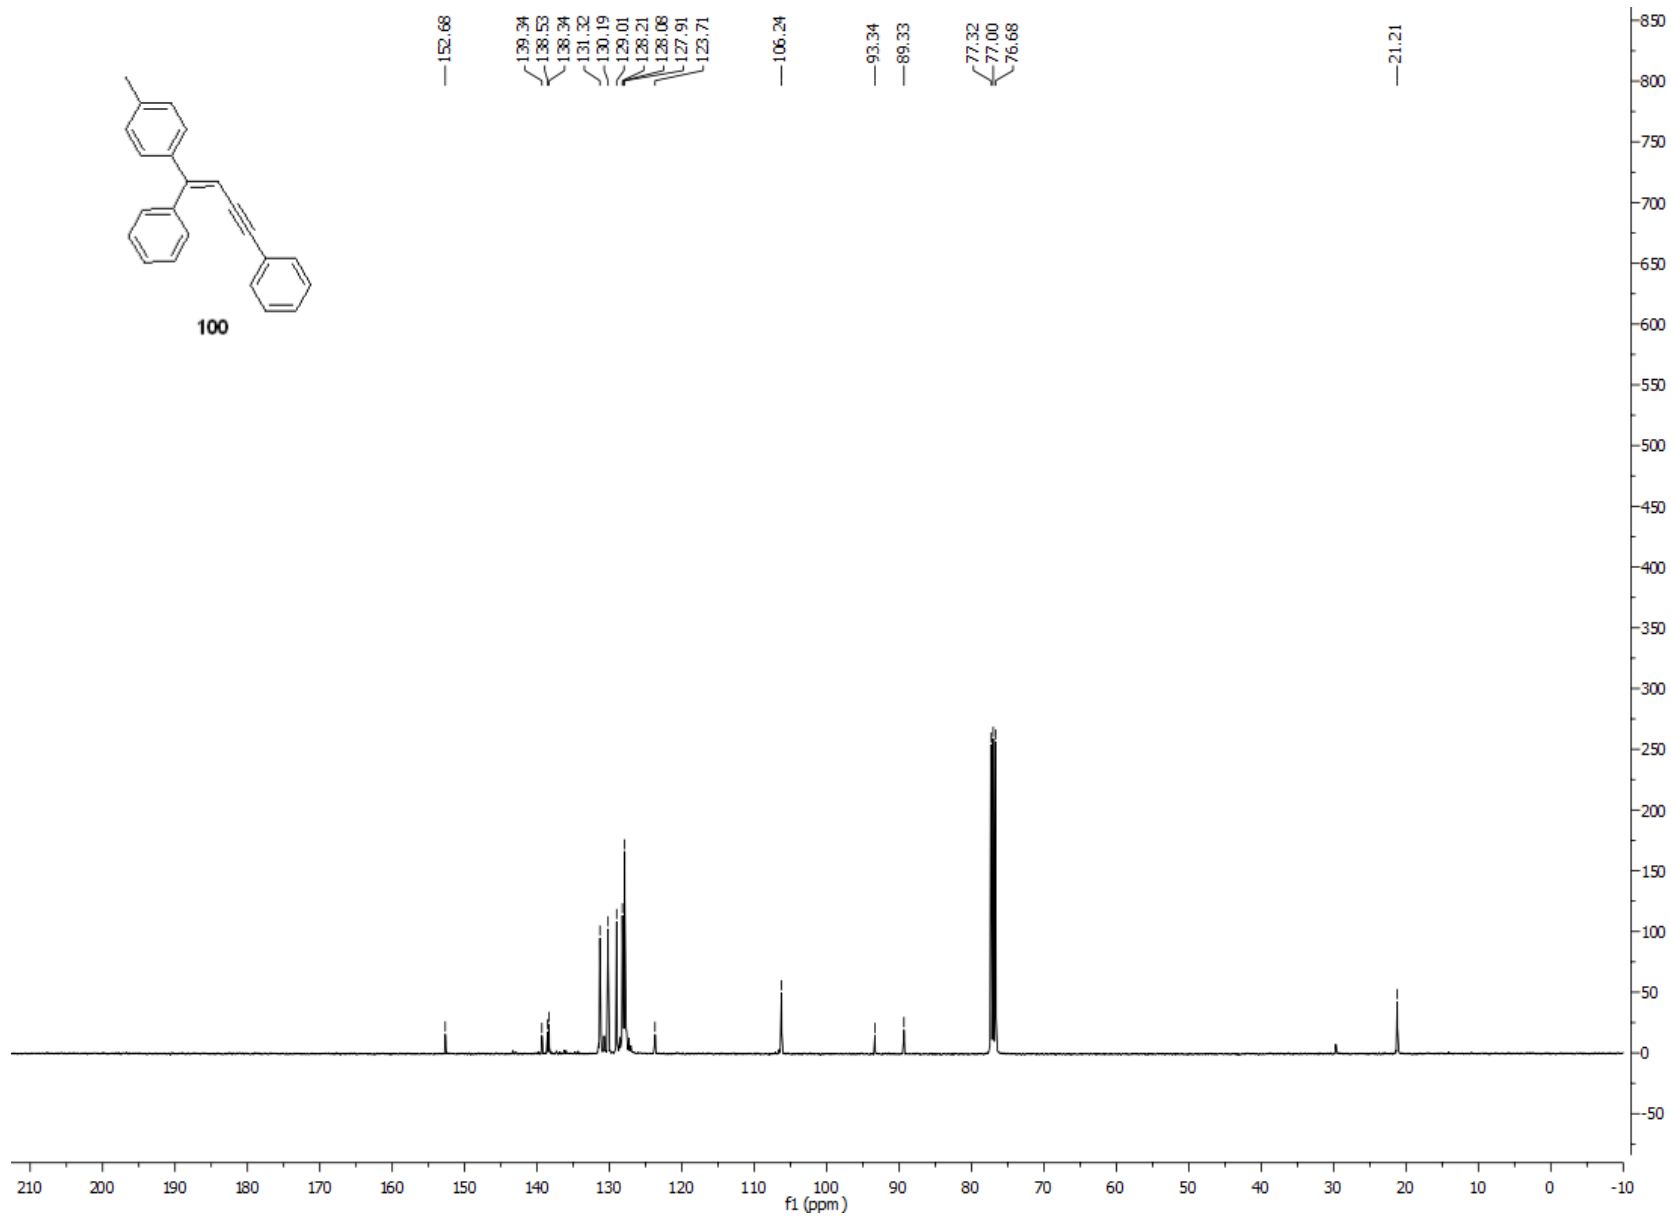

Figure S222. <sup>1</sup>H-NMR of **101**

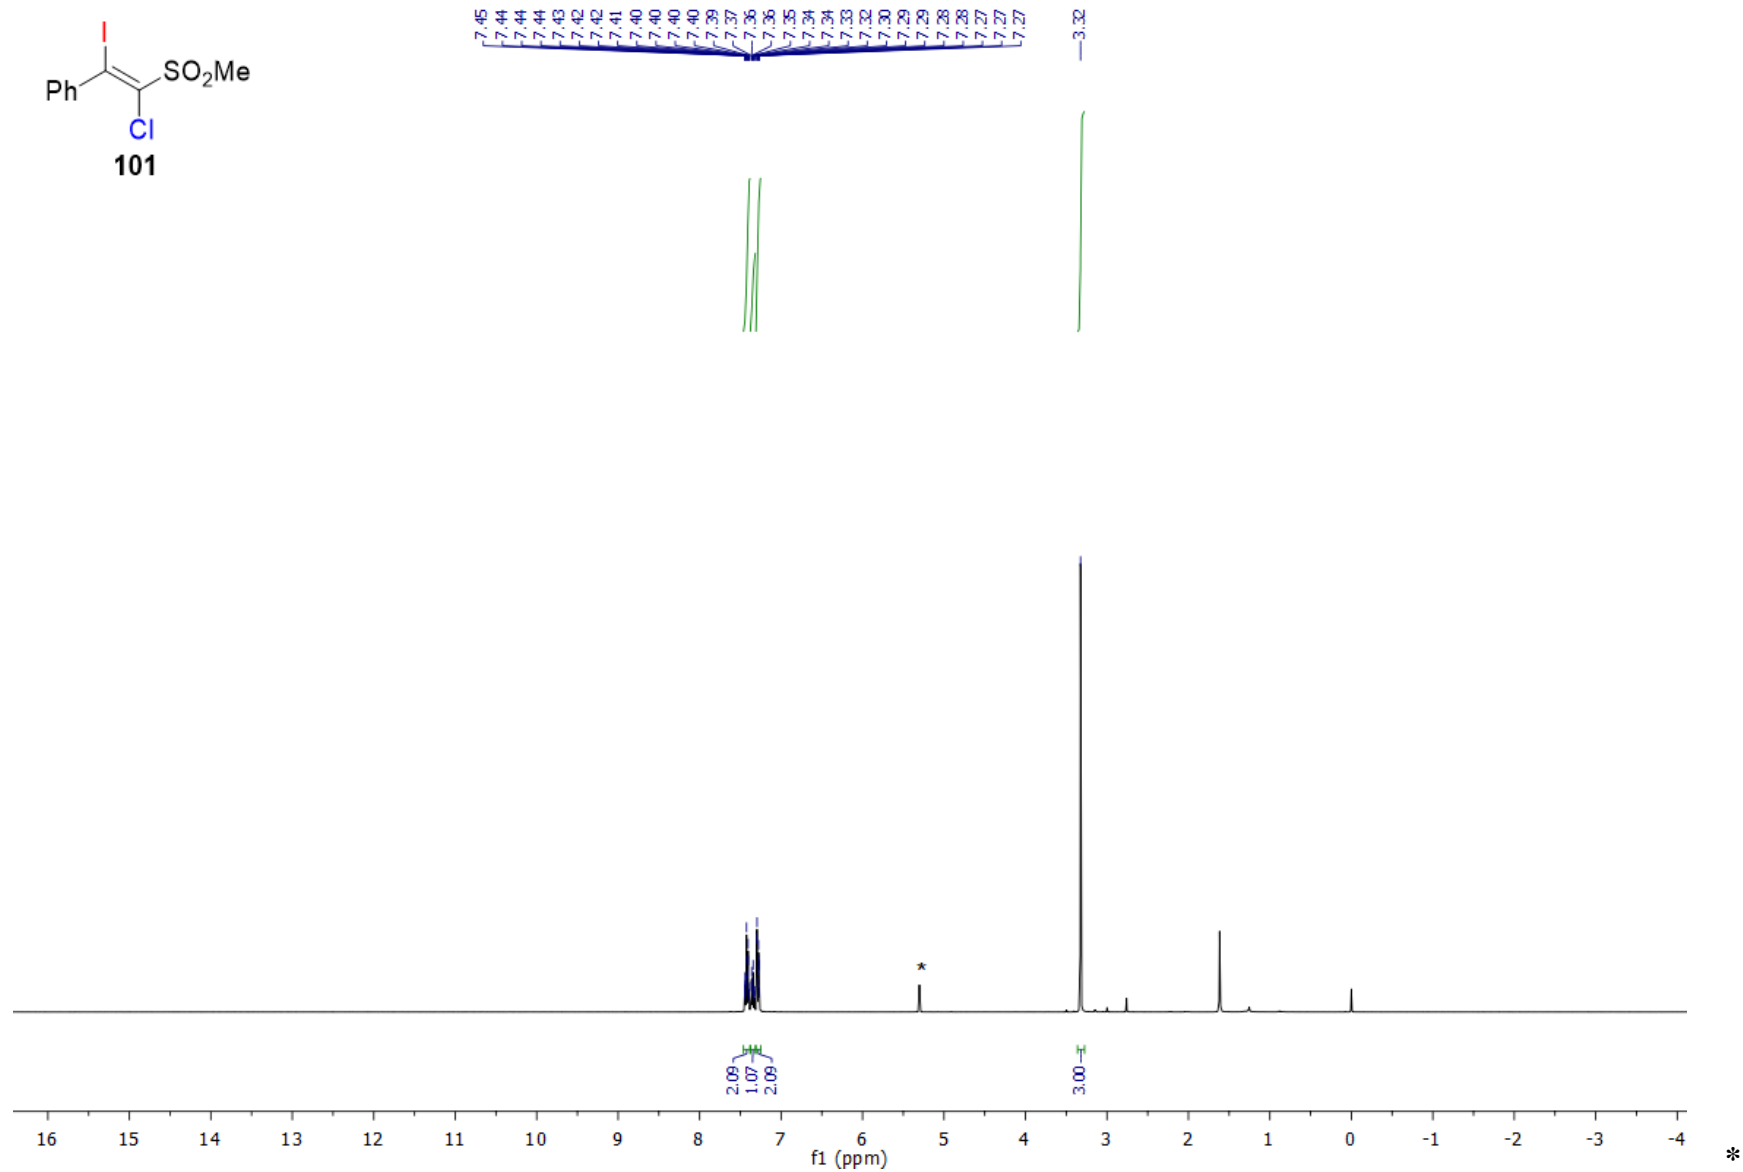

Figure S223.  $^{13}\text{C}$ -NMR of **101**

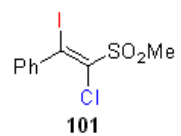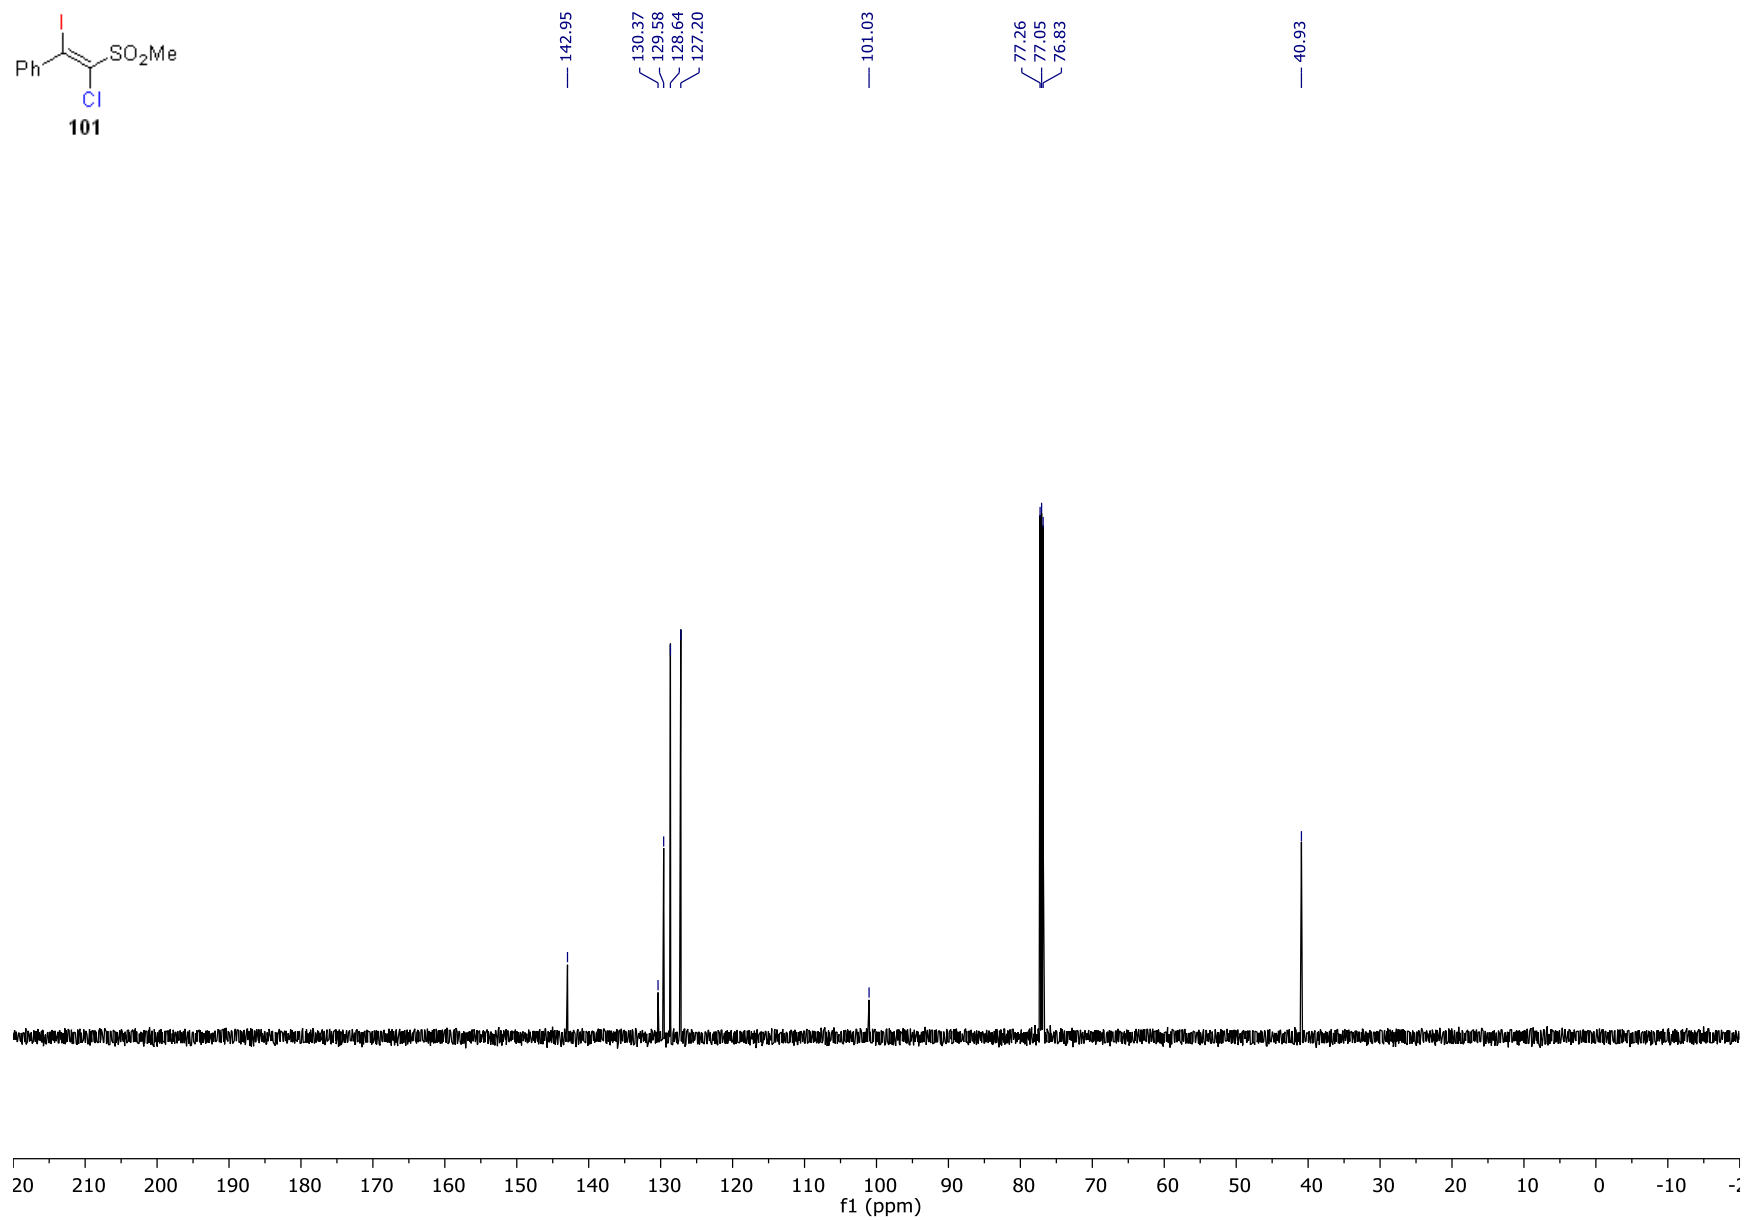

Figure S224. <sup>1</sup>H-NMR of 102

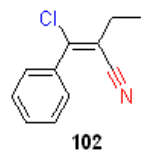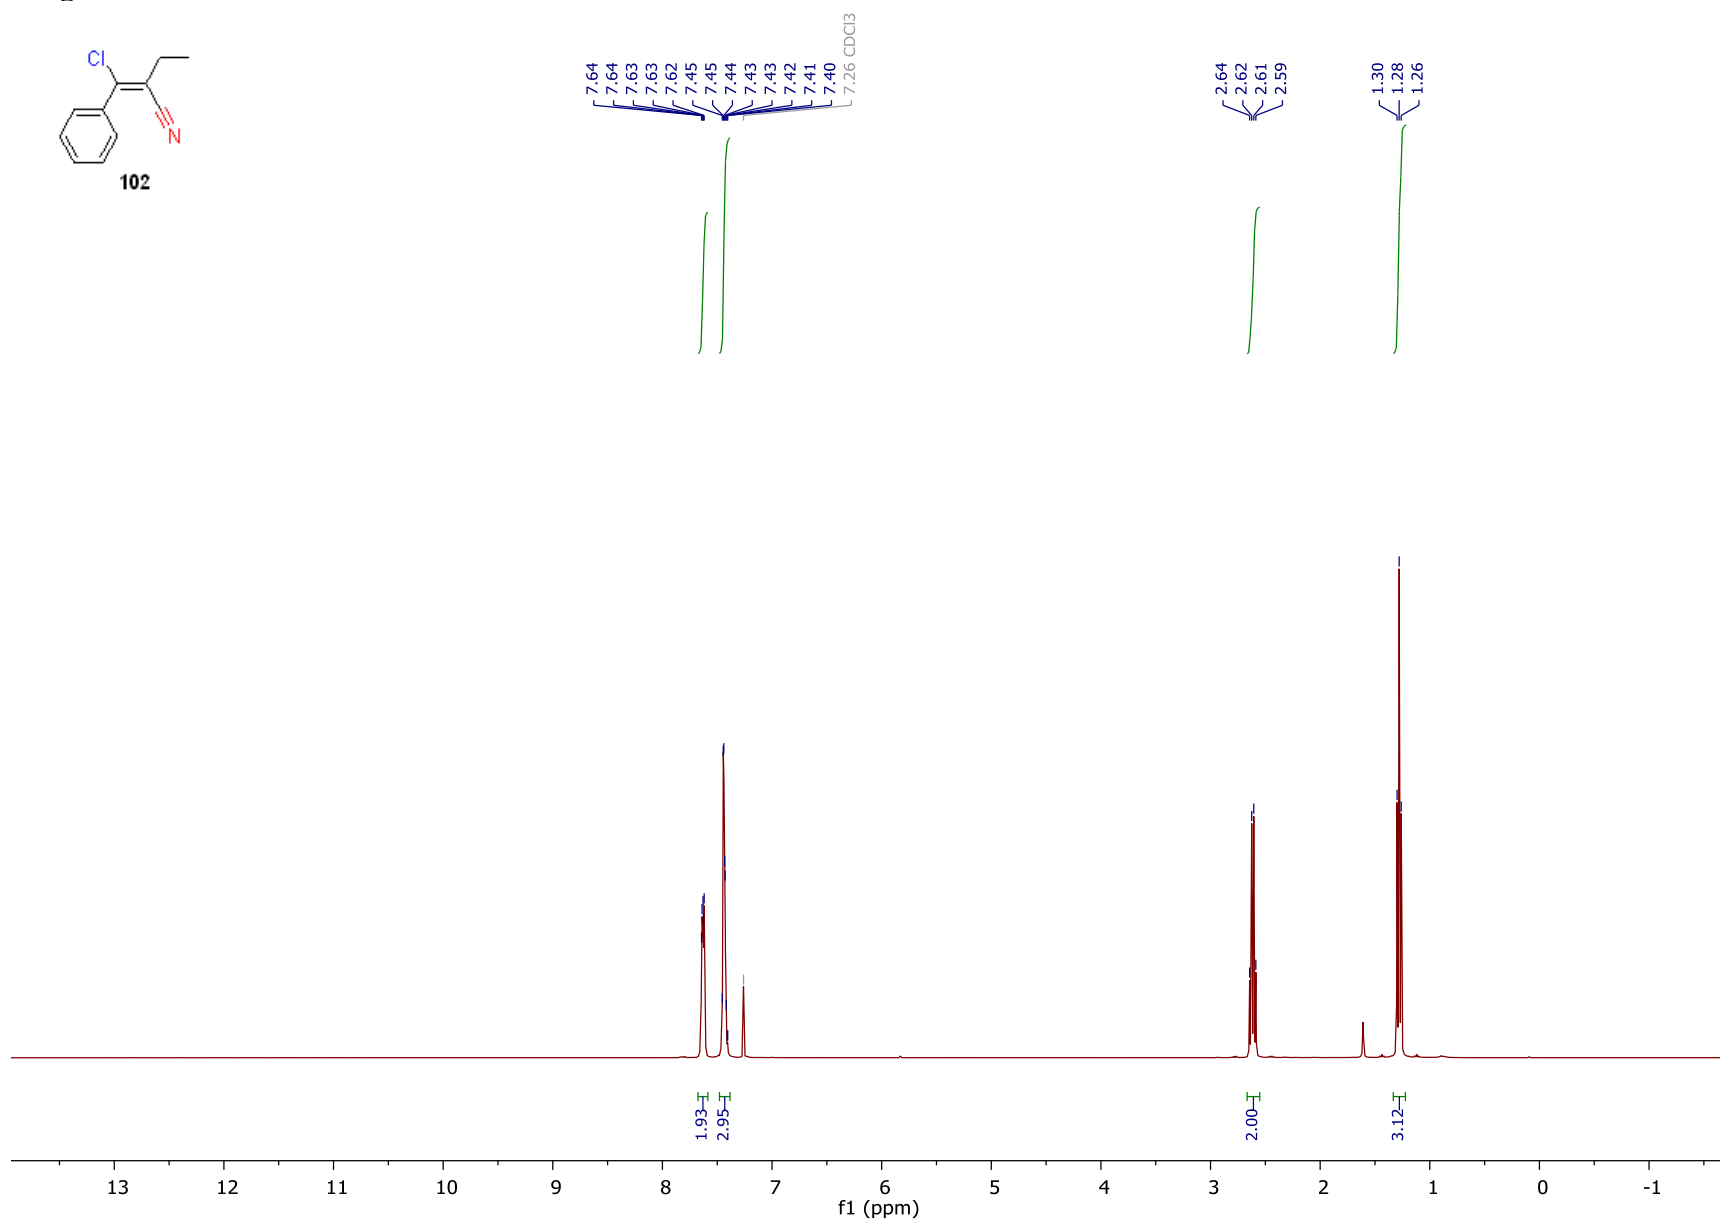

Figure S225.  $^{13}\text{C}$ -NMR of **102**

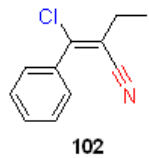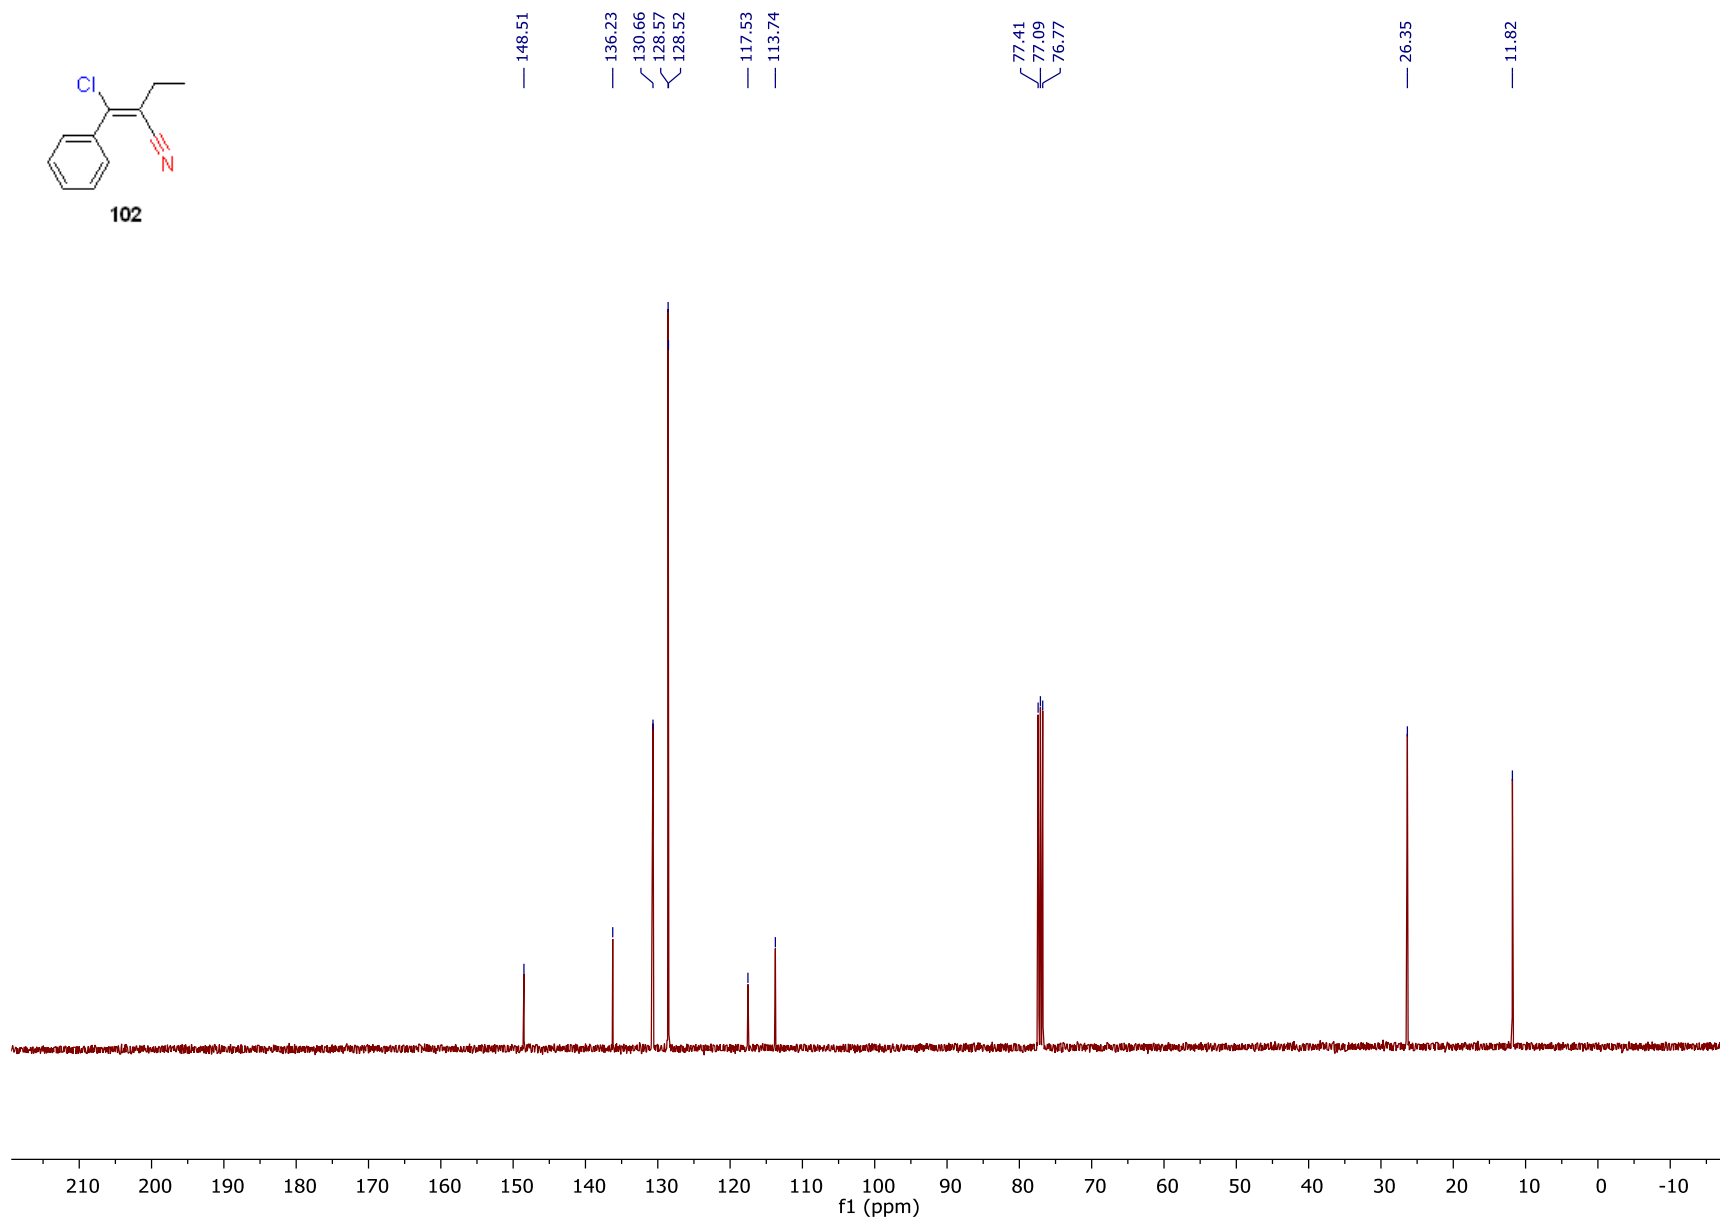

Figure S226. <sup>1</sup>H-NMR of 103

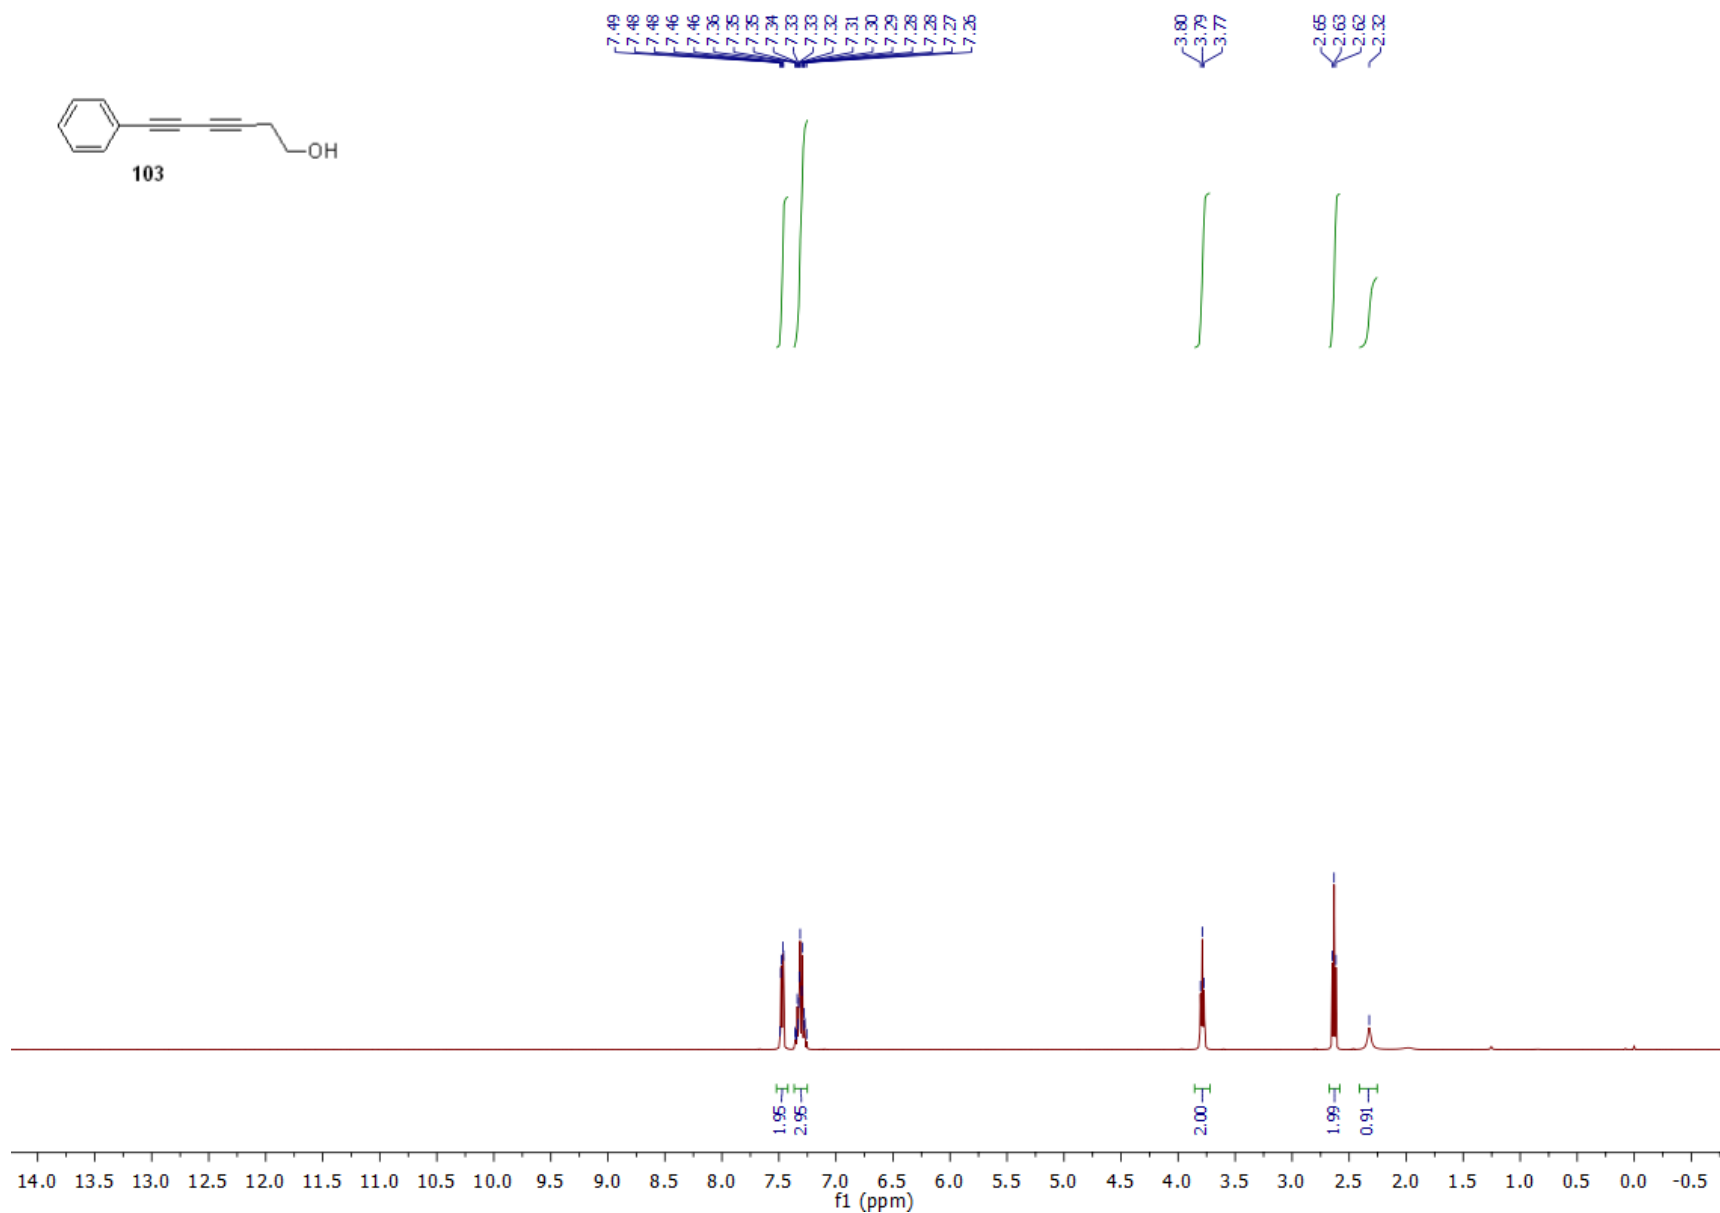



Figure S227.  $^{13}\text{C}$ -NMR of **103**

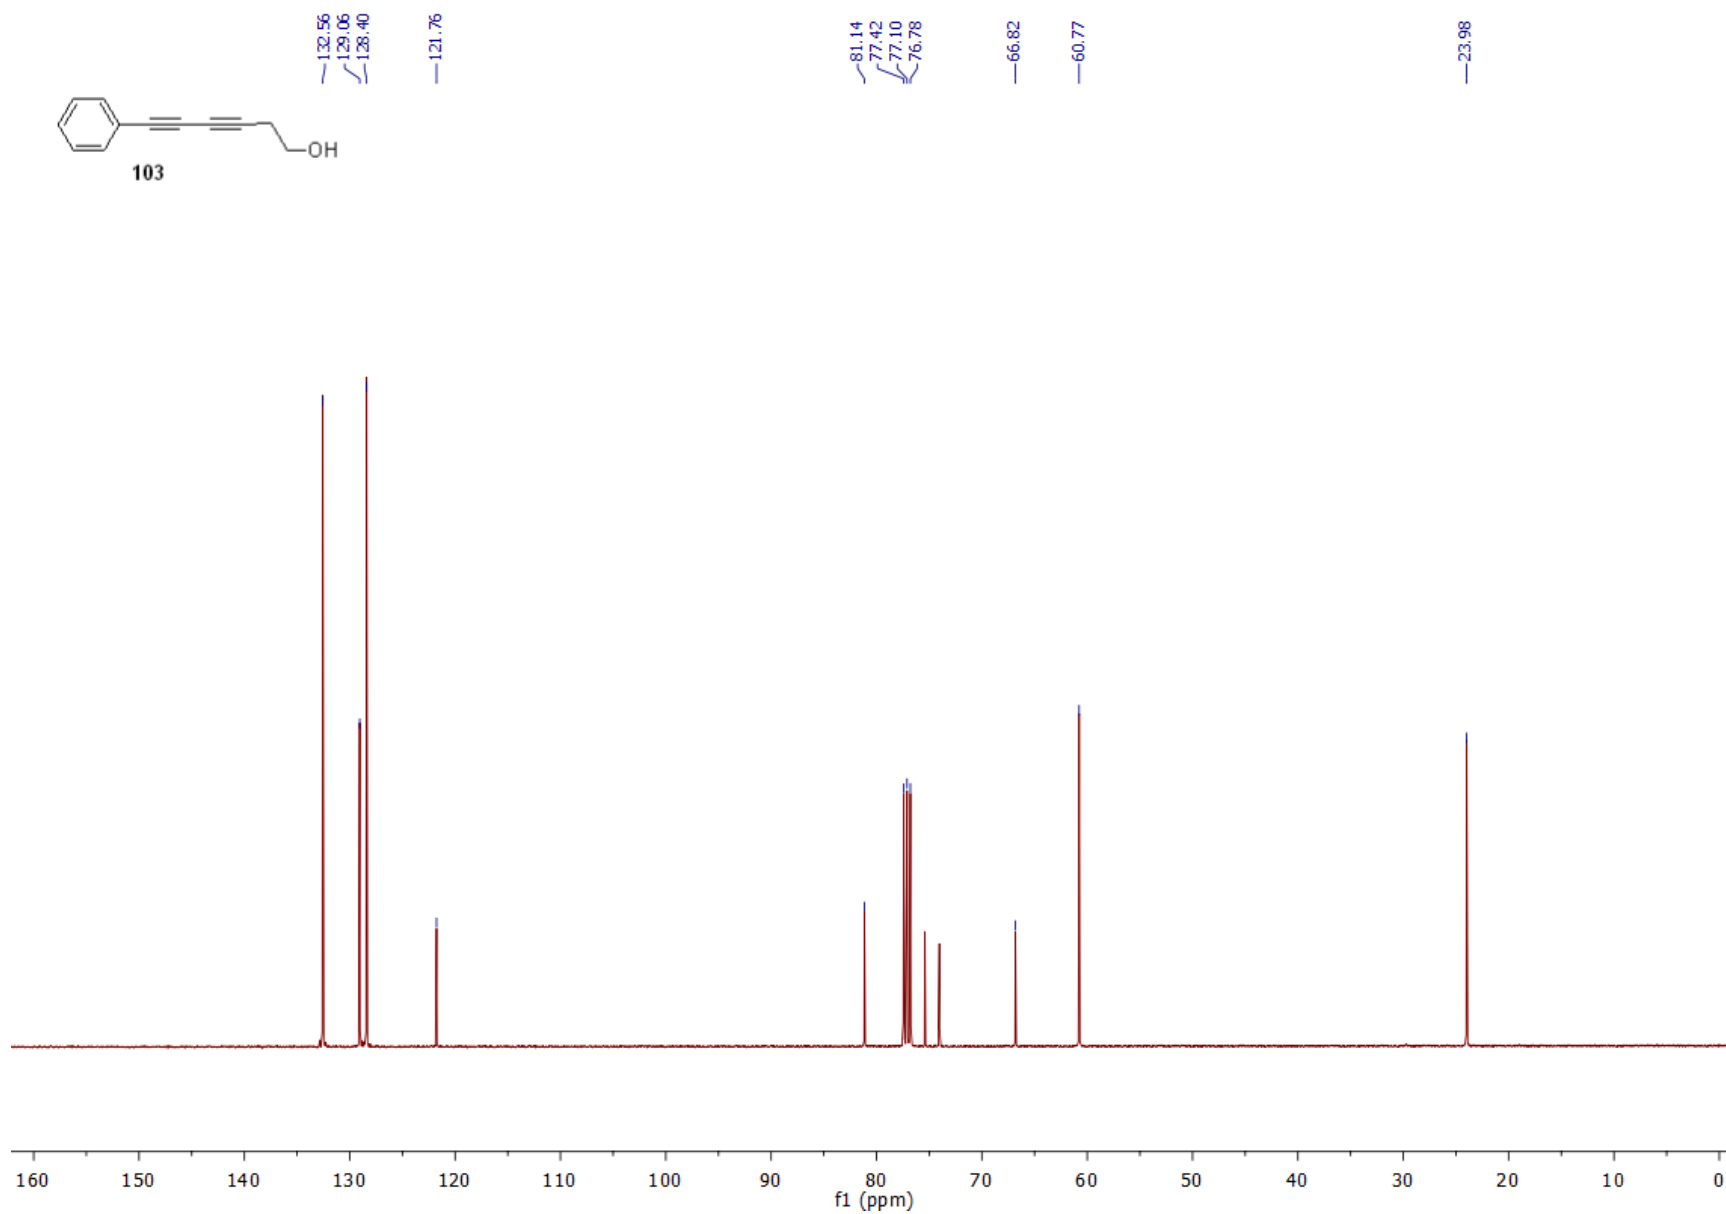

Figure S228. <sup>1</sup>H-NMR of 104

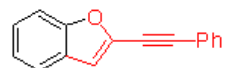

104

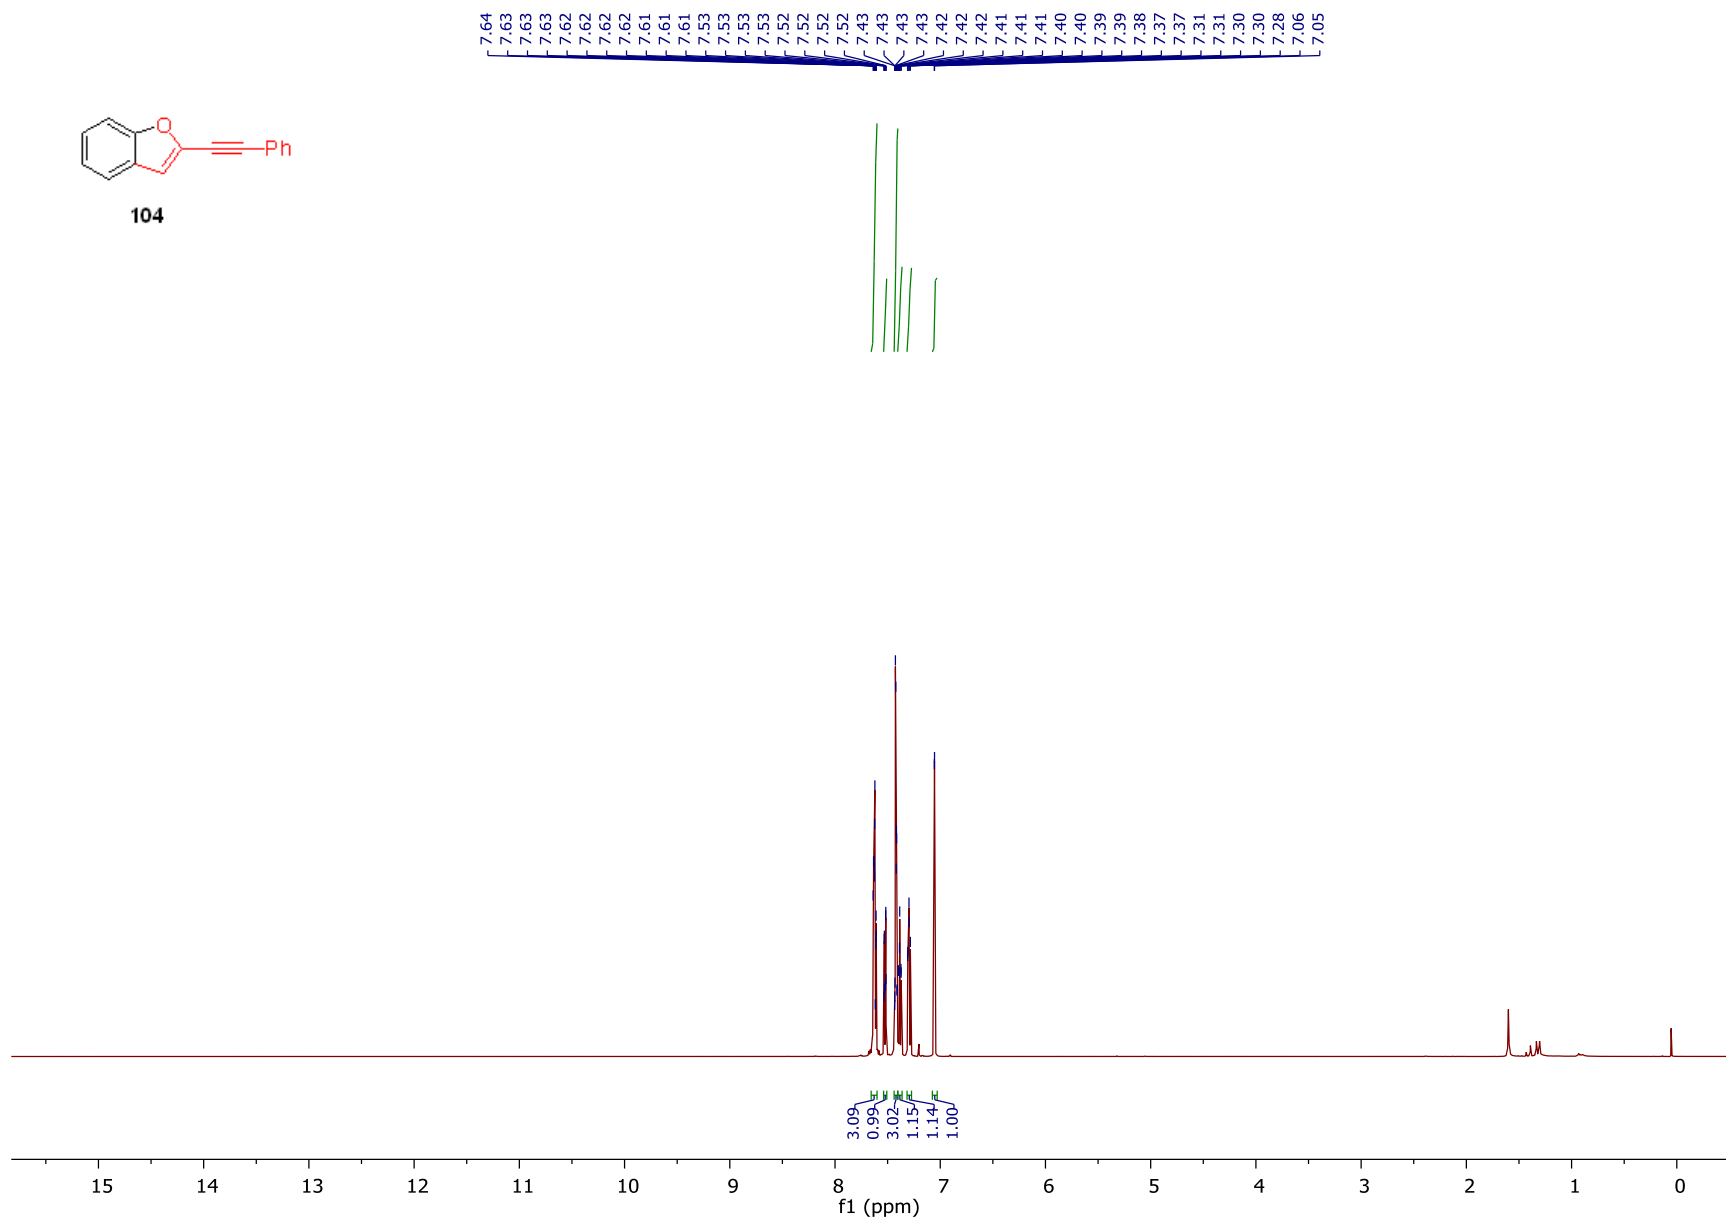

S298

Figure S229.  $^{13}\text{C}$ -NMR of **104**

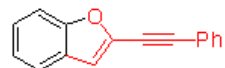

**104**

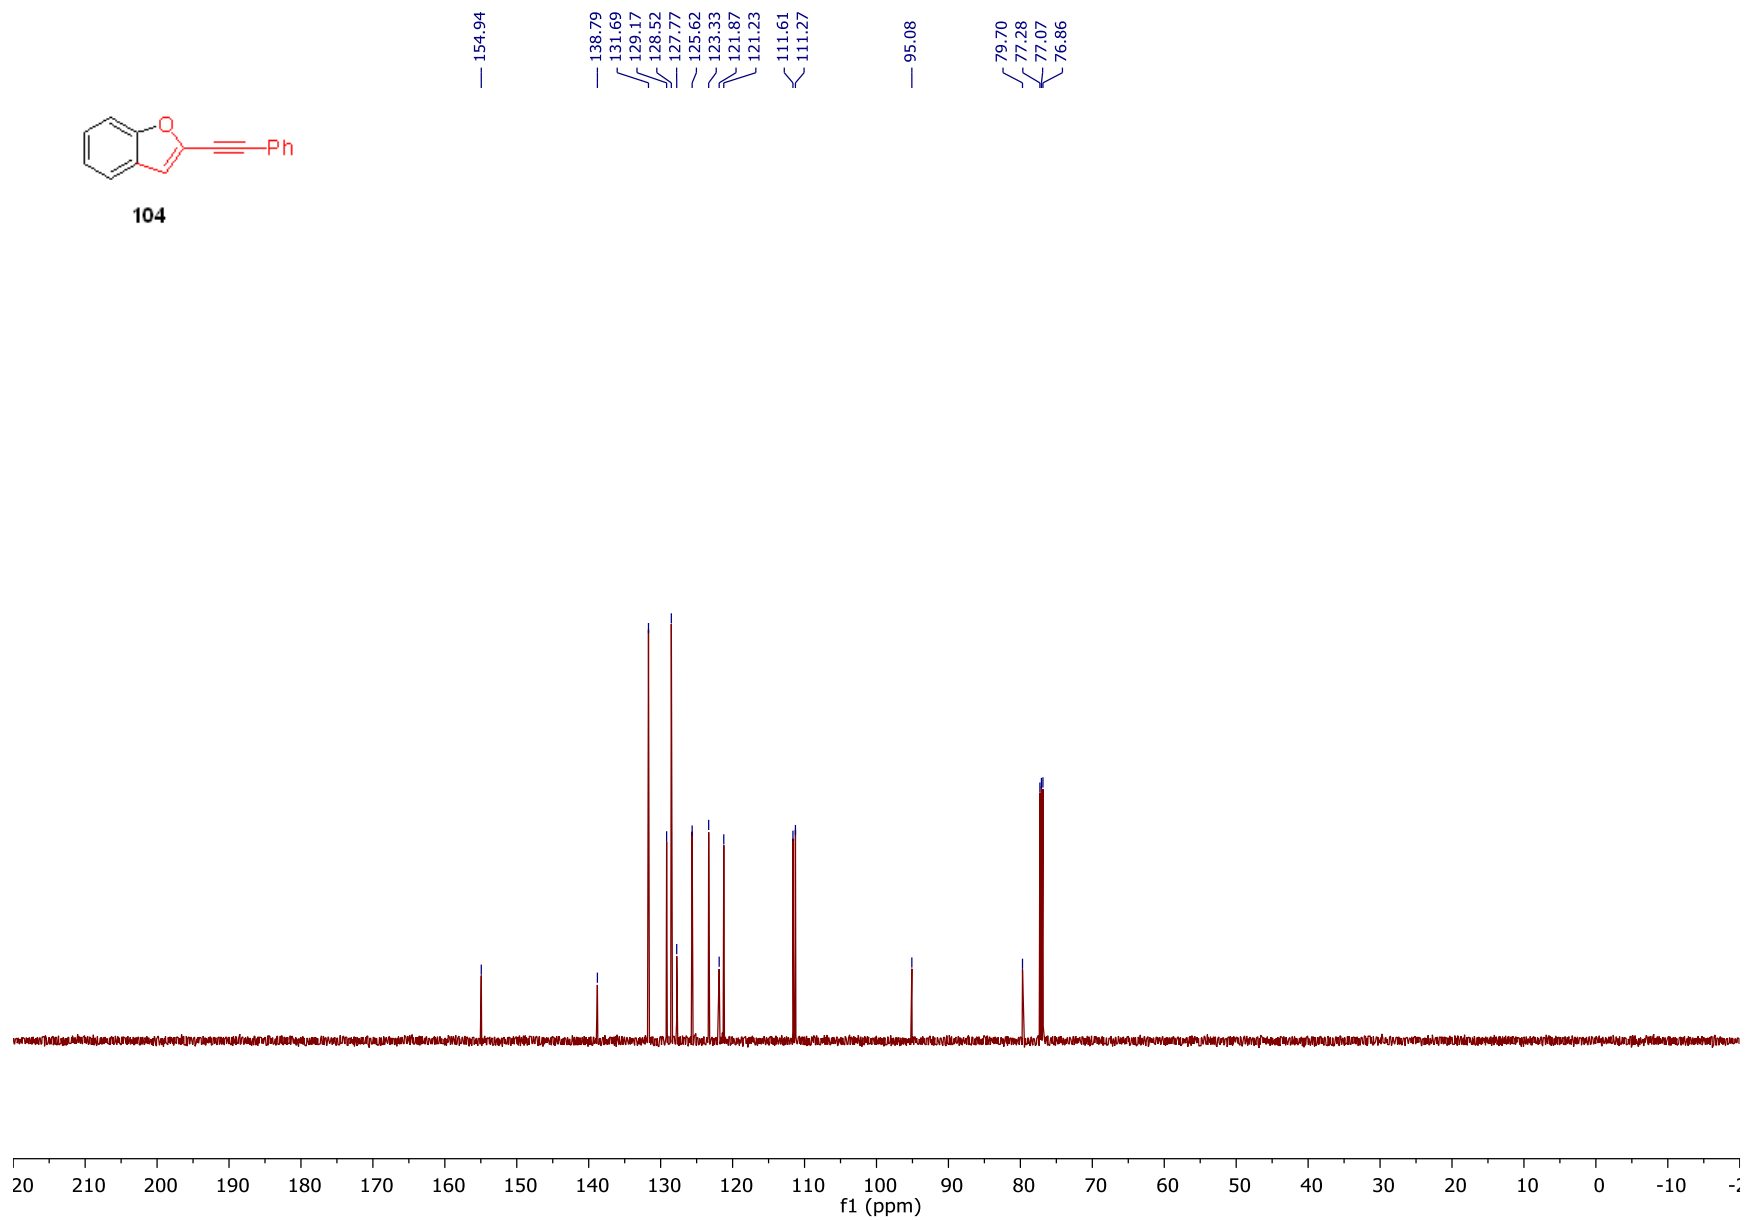

Figure S230. <sup>1</sup>H-NMR of 105

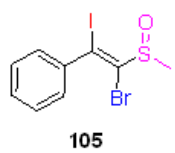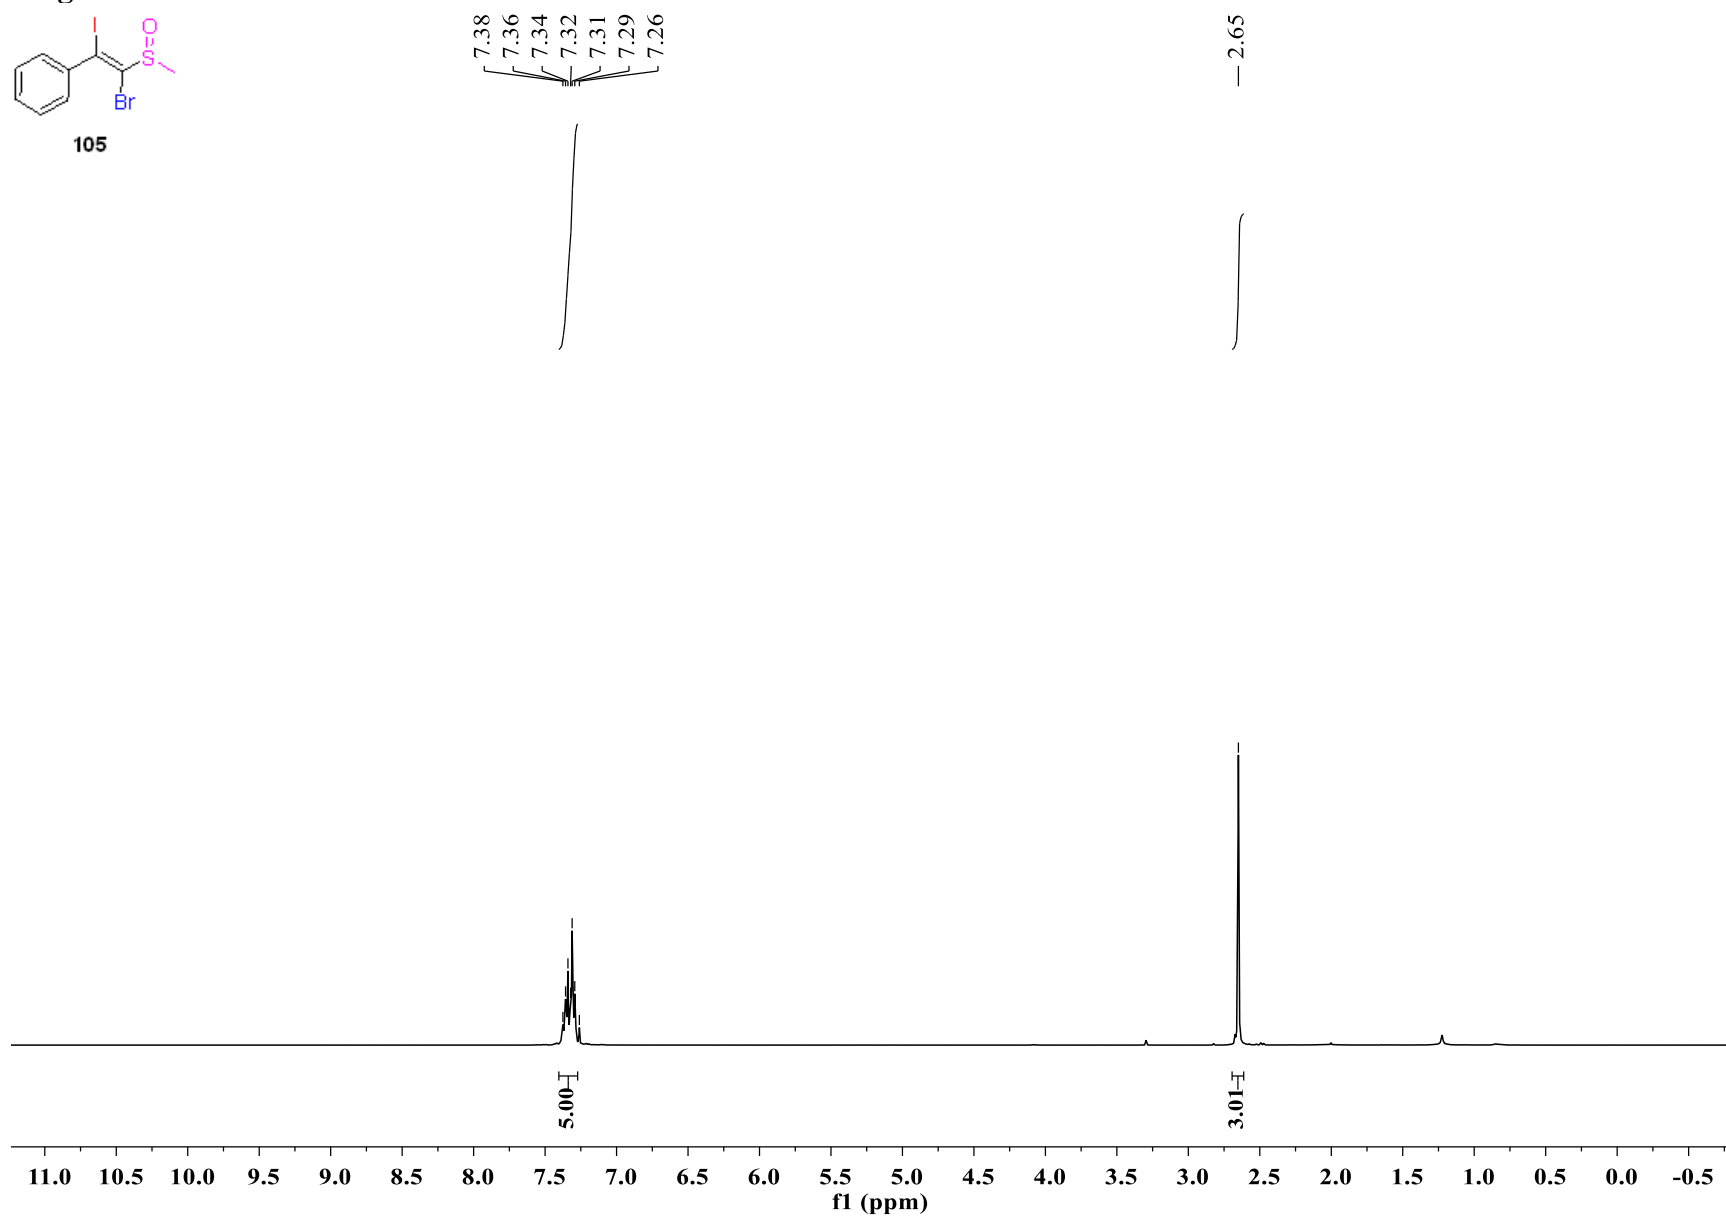

Figure S231.  $^{13}\text{C}$ -NMR of **105**

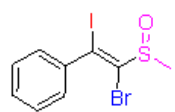

**105**

— 141.98

131.27

129.62

128.56

128.22

— 99.34

— 38.98

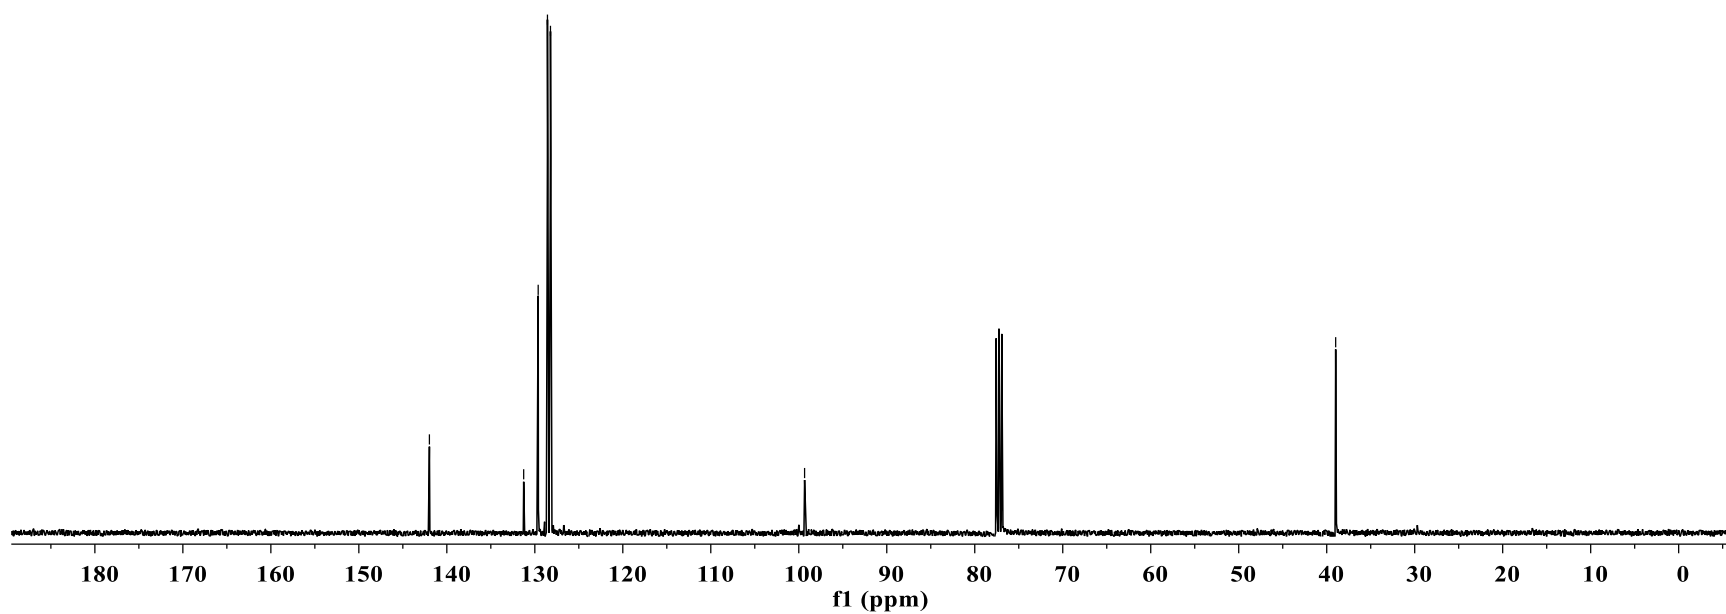

S301
